# Supplementary material for: Identification of Methylation Signatures and Rules for Sarcoma Subtypes by Machine Learning Methods
Source: Hindawi journal article supplement (doi:10.1155/2022/5297235), 2022-01-01
Supplement: f1 [file 5297235.f1.zip]

**Table S2:** Feature ranking results obtained using LASSO, LightGBM, and MCFS.

| Rank | LASSO feature list | LightGBM feature list | MCFS feature list |
|------|--------------------|-----------------------|-------------------|
| 1    | cg16452651         | cg03359508            | cg04703221        |
| 2    | cg25339408         | cg20560906            | cg03438101        |
| 3    | cg08325885         | cg24613083            | cg13453203        |
| 4    | cg17056676         | cg03988119            | cg01013023        |
| 5    | cg22799860         | cg16071782            | cg01727408        |
| 6    | cg06509362         | cg12895304            | cg20415947        |
| 7    | cg09604238         | cg08304608            | cg27065717        |
| 8    | cg21726593         | cg02619478            | cg11854392        |
| 9    | cg10457066         | cg13810664            | cg13734860        |
| 10   | cg21307043         | cg22706883            | cg26152051        |
| 11   | cg08573299         | cg17886413            | cg01084215        |
| 12   | cg01356872         | cg02315513            | cg23902076        |
| 13   | cg25373624         | cg03639152            | cg14839134        |
| 14   | cg10370025         | cg05555455            | cg03223959        |
| 15   | cg20065217         | cg02202664            | cg10131972        |
| 16   | cg19287349         | cg25461827            | cg02650017        |
| 17   | cg27336068         | cg06827256            | cg06814256        |
| 18   | cg27403628         | cg06950392            | cg23075506        |
| 19   | cg26607933         | cg08913523            | cg26929355        |
| 20   | cg15532942         | cg22161706            | cg17758899        |
| 21   | cg02734419         | cg11843516            | cg23311929        |
| 22   | cg02471028         | cg01863398            | cg05951828        |
| 23   | cg06950392         | cg00765705            | cg13473184        |
| 24   | cg06323896         | cg07333510            | cg04815973        |
| 25   | cg20943461         | cg04007841            | cg24202221        |
| 26   | cg10960375         | cg17171539            | cg16461139        |
| 27   | cg15346286         | cg02628360            | cg23519637        |
| 28   | cg08240917         | cg09925747            | cg02816525        |
| 29   | cg03614132         | cg26543333            | cg27495643        |
| 30   | cg22731190         | cg25834632            | cg04867652        |
| 31   | cg24073994         | cg01664382            | cg11285912        |
| 32   | cg16269776         | cg09123625            | cg16232530        |
| 33   | cg00042325         | cg26018322            | cg05376738        |
| 34   | cg27143326         | cg15639842            | cg07324116        |
| 35   | cg19849641         | cg27010076            | cg23723410        |
| 36   | cg12266049         | cg12744447            | cg15577180        |
| 37   | cg07727134         | cg06659338            | cg24283049        |
| 38   | cg20218614         | cg03971344            | cg27301230        |
| 39   | cg25134701         | cg22663660            | cg00651497        |
| 40   | cg07066794         | cg17428748            | cg23986590        |
| 41   | cg10546888         | cg06967316            | cg08132573        |
| 42   | cg03840920         | cg15317049            | cg17367884        |
| 43   | cg16023107         | cg25453957            | cg02665399        |
| 44   | cg00706536         | cg22204453            | cg04658707        |
| 45   | cg25245161         | cg21163714            | cg02061967        |
| 46   | cg25556464         | cg04708036            | cg13808936        |
| 47   | cg05760053         | cg17938607            | cg20592766        |
| 48   | cg17497965         | cg24852135            | cg08209934        |
| 49   | cg15553612         | cg00001687            | cg15230883        |
| 50   | cg18273464         | cg02829456            | cg11311843        |

|     |            |            |            |
|-----|------------|------------|------------|
| 51  | cg11088489 | cg17469039 | cg19857461 |
| 52  | cg13734106 | cg14410516 | cg23539753 |
| 53  | cg18847089 | cg23719367 | cg24499677 |
| 54  | cg10532807 | cg04774476 | cg10722267 |
| 55  | cg06584121 | cg22977745 | cg05813328 |
| 56  | cg24926121 | cg15540341 | cg20690695 |
| 57  | cg06562964 | cg01439112 | cg00657810 |
| 58  | cg10327980 | cg00885461 | cg16073408 |
| 59  | cg11143193 | cg09786420 | cg20899781 |
| 60  | cg22958118 | cg07891483 | cg01323212 |
| 61  | cg08343075 | cg02148034 | cg15342087 |
| 62  | cg19313353 | cg09494609 | cg24024036 |
| 63  | cg13922681 | cg01818102 | cg08061755 |
| 64  | cg01837846 | cg16700163 | cg19259111 |
| 65  | cg19745930 | cg06752365 | cg14505694 |
| 66  | cg05364072 | cg00783706 | cg07946977 |
| 67  | cg09982918 | cg18556792 | cg16700163 |
| 68  | cg04665930 | cg08097657 | cg01007781 |
| 69  | cg11748187 | cg03234557 | cg03077671 |
| 70  | cg12865675 | cg14005246 | cg00133595 |
| 71  | cg25815219 | cg23237976 | cg19262818 |
| 72  | cg05960932 | cg23208152 | cg20669366 |
| 73  | cg04254540 | cg09558069 | cg04147497 |
| 74  | cg06098693 | cg09326362 | cg08779777 |
| 75  | cg10457079 | cg02353448 | cg21386766 |
| 76  | cg27067922 | cg16602460 | cg18749563 |
| 77  | cg09425164 | cg17459290 | cg01262865 |
| 78  | cg03017946 | cg07266910 | cg02753511 |
| 79  | cg04457069 | cg11412527 | cg07197326 |
| 80  | cg07824182 | cg04140971 | cg24859433 |
| 81  | cg05116002 | cg26847438 | cg12690127 |
| 82  | cg06340118 | cg19138499 | cg15028507 |
| 83  | cg04440361 | cg16819272 | cg21757281 |
| 84  | cg05205532 | cg16770054 | cg15161050 |
| 85  | cg00610577 | cg26321613 | cg18055067 |
| 86  | cg02528008 | cg18852515 | cg15262242 |
| 87  | cg05139187 | cg24358599 | cg05482864 |
| 88  | cg06772578 | cg25403283 | cg24987440 |
| 89  | cg15959921 | cg19536781 | cg24386135 |
| 90  | cg23171099 | cg13358061 | cg12308279 |
| 91  | cg01723892 | cg26880445 | cg27226424 |
| 92  | cg21171299 | cg06193668 | cg09335712 |
| 93  | cg00187129 | cg01968002 | cg05229802 |
| 94  | cg12178980 | cg00785482 | cg27161027 |
| 95  | cg20285745 | cg00436722 | cg17508905 |
| 96  | cg09861034 | cg02793948 | cg16185457 |
| 97  | cg20528338 | cg00216961 | cg27449255 |
| 98  | cg09141835 | cg22575379 | cg00158530 |
| 99  | cg14129169 | cg08825895 | cg17193551 |
| 100 | cg08390994 | cg15715853 | cg17736336 |
| 101 | cg12700788 | cg20592766 | cg18503234 |
| 102 | cg20256649 | cg02926266 | cg14789529 |
| 103 | cg13624631 | cg04963697 | cg00900735 |

|     |            |            |            |
|-----|------------|------------|------------|
| 104 | cg24866203 | cg14024328 | cg07294624 |
| 105 | cg13148921 | cg00259518 | cg00070460 |
| 106 | cg16535788 | cg26720682 | cg19849478 |
| 107 | cg14467840 | cg02306481 | cg20664445 |
| 108 | cg05976516 | cg06943385 | cg13957126 |
| 109 | cg17860133 | cg18752987 | cg24002003 |
| 110 | cg12210305 | cg12121782 | cg26011438 |
| 111 | cg06884199 | cg01683570 | cg00586700 |
| 112 | cg00341297 | cg21850879 | cg15679098 |
| 113 | cg17297775 | cg19779886 | cg17610889 |
| 114 | cg16723180 | cg15899297 | cg10142436 |
| 115 | cg08897688 | cg06263395 | cg26064794 |
| 116 | cg04141218 | cg03148858 | cg03549146 |
| 117 | cg05229802 | cg01260146 | cg11444072 |
| 118 | cg03212620 | cg20329085 | cg24186506 |
| 119 | cg25028855 | cg07571745 | cg24824472 |
| 120 | cg13745832 | cg01338955 | cg18231184 |
| 121 | cg17329004 | cg23690444 | cg05824174 |
| 122 | cg13414654 | cg13298538 | cg19508622 |
| 123 | cg07012739 | cg04716580 | cg10012530 |
| 124 | cg14462432 | cg02983650 | cg05109049 |
| 125 | cg12939390 | cg02660541 | cg07802362 |
| 126 | cg13215078 | cg14081251 | cg24866203 |
| 127 | cg09932436 | cg00982952 | cg05650238 |
| 128 | cg27395391 | cg23971517 | cg16402415 |
| 129 | cg13461509 | cg09685505 | cg26757820 |
| 130 | cg00299943 | cg27505472 | cg26566236 |
| 131 | cg13071729 | cg22990726 | cg19536781 |
| 132 | cg03131767 | cg16217297 | cg25138553 |
| 133 | cg08806632 | cg08331427 | cg15934607 |
| 134 | cg05181397 | cg02462416 | cg06562888 |
| 135 | cg01448551 | cg24420164 | cg08002981 |
| 136 | cg08894066 | cg18461635 | cg02108015 |
| 137 | cg24747239 | cg17036007 | cg25431366 |
| 138 | cg13309415 | cg11935248 | cg09897737 |
| 139 | cg03498175 | cg11762760 | cg17796043 |
| 140 | cg04629141 | cg09318508 | cg07363131 |
| 141 | cg13470673 | cg04311473 | cg04195226 |
| 142 | cg04505897 | cg23393892 | cg18758976 |
| 143 | cg04907595 | cg19057779 | cg14189391 |
| 144 | cg20019410 | cg12939390 | cg06323896 |
| 145 | cg22957135 | cg00131423 | cg09141835 |
| 146 | cg15174926 | cg24314474 | cg13598881 |
| 147 | cg19354017 | cg19857633 | cg19244380 |
| 148 | cg24386905 | cg13808936 | cg25947619 |
| 149 | cg09327610 | cg11080651 | cg13753526 |
| 150 | cg07907506 | cg03006477 | cg25510609 |
| 151 | cg25154482 | cg00757391 | cg21648069 |
| 152 | cg10000148 | cg23357150 | cg19698242 |
| 153 | cg19244380 | cg04353106 | cg21557473 |
| 154 | cg07187503 | cg02034328 | cg03545972 |
| 155 | cg17477806 | cg00626390 | cg15881332 |
| 156 | cg14584535 | cg26954228 | cg15843262 |

|     |            |            |            |
|-----|------------|------------|------------|
| 157 | cg00680277 | cg19239692 | cg12017558 |
| 158 | cg07329131 | cg16996266 | cg00569091 |
| 159 | cg14065153 | cg20415947 | cg26034341 |
| 160 | cg10841956 | cg15020964 | cg08240917 |
| 161 | cg10518527 | cg00810292 | cg05664352 |
| 162 | cg00887848 | cg18090631 | cg15715853 |
| 163 | cg07598035 | cg08092318 | cg05341539 |
| 164 | cg26156321 | cg04438661 | cg09230938 |
| 165 | cg24059075 | cg24259291 | cg25590335 |
| 166 | cg25236277 | cg00607989 | cg09186408 |
| 167 | cg17437086 | cg25189808 | cg01349691 |
| 168 | cg19101998 | cg23172911 | cg16306870 |
| 169 | cg10107466 | cg15720017 | cg13721644 |
| 170 | cg12734386 | cg14420645 | cg06186808 |
| 171 | cg16889721 | cg08750440 | cg13800349 |
| 172 | cg05339403 | cg03538565 | cg22731637 |
| 173 | cg19109601 | cg13708908 | cg06174078 |
| 174 | cg02817925 | cg11444072 | cg06611426 |
| 175 | cg06783380 | cg11234767 | cg22451412 |
| 176 | cg04724275 | cg26963844 | cg17434577 |
| 177 | cg07607355 | cg06143290 | cg01044293 |
| 178 | cg18382744 | cg01661567 | cg12832726 |
| 179 | cg23413464 | cg21698310 | cg09701233 |
| 180 | cg15464763 | cg20285745 | cg13366501 |
| 181 | cg23181573 | cg15545942 | cg04963697 |
| 182 | cg11468635 | cg09623085 | cg01400750 |
| 183 | cg26105283 | cg06937357 | cg07536018 |
| 184 | cg03811905 | cg26891661 | cg04884579 |
| 185 | cg02827340 | cg24982682 | cg00820405 |
| 186 | cg08364860 | cg23222247 | cg16572224 |
| 187 | cg24404329 | cg15929241 | cg14565439 |
| 188 | cg05661968 | cg11538848 | cg19130973 |
| 189 | cg16617774 | cg01937669 | cg12681370 |
| 190 | cg03515290 | cg21189849 | cg16752592 |
| 191 | cg12113251 | cg01012242 | cg27306787 |
| 192 | cg03888083 | cg27302539 | cg13681684 |
| 193 | cg21658153 | cg12113251 | cg20293725 |
| 194 | cg10626305 | cg08572315 | cg04956511 |
| 195 | cg04015687 | cg00051546 | cg06989253 |
| 196 | cg24706505 | cg17266282 | cg03538565 |
| 197 | cg25573640 | cg16489468 | cg19374752 |
| 198 | cg00559439 | cg14104252 | cg04213390 |
| 199 | cg03446062 | cg12762413 | cg14286546 |
| 200 | cg07131274 | cg16721977 | cg00353407 |
| 201 | cg14698794 | cg16102706 | cg06368978 |
| 202 | cg11068930 | cg15247169 | cg09825309 |
| 203 | cg09123625 | cg14514032 | cg15702277 |
| 204 | cg24613083 | cg13663738 | cg06547766 |
| 205 | cg12741436 | cg04972957 | cg08447373 |
| 206 | cg21863721 | cg22202031 | cg10017293 |
| 207 | cg11270070 | cg20195046 | cg15686782 |
| 208 | cg04612073 | cg08033285 | cg09006420 |
| 209 | cg22805632 | cg07927953 | cg10408178 |

|     |            |            |            |
|-----|------------|------------|------------|
| 210 | cg22584802 | cg07377299 | cg03013917 |
| 211 | cg04883903 | cg05482973 | cg03431524 |
| 212 | cg03779973 | cg03779937 | cg03376089 |
| 213 | cg09164574 | cg03139388 | cg07021447 |
| 214 | cg16067210 | cg21979773 | cg11041314 |
| 215 | cg03131732 | cg12944530 | cg01606770 |
| 216 | cg09537038 | cg05076082 | cg26184501 |
| 217 | cg06126019 | cg26124719 | cg02998240 |
| 218 | cg23477348 | cg13470673 | cg07507493 |
| 219 | cg04254198 | cg11994639 | cg06795827 |
| 220 | cg07512971 | cg04473209 | cg25730564 |
| 221 | cg08779982 | cg02197542 | cg20076442 |
| 222 | cg10062065 | cg25520910 | cg23485307 |
| 223 | cg01678309 | cg25310555 | cg00967711 |
| 224 | cg01828733 | cg25013838 | cg25281849 |
| 225 | cg02633600 | cg22809726 | cg25556464 |
| 226 | cg06204229 | cg17384769 | cg06880930 |
| 227 | cg13846358 | cg04095995 | cg16081096 |
| 228 | cg17196713 | cg27437304 | cg14482093 |
| 229 | cg12595697 | cg27351813 | cg27025137 |
| 230 | cg24015175 | cg25364972 | cg18878210 |
| 231 | cg06765552 | cg19772651 | cg19776793 |
| 232 | cg19137748 | cg17367836 | cg15487498 |
| 233 | cg14081465 | cg11977716 | cg13948857 |
| 234 | cg21450654 | cg10976861 | cg02968890 |
| 235 | cg03417340 | cg05650238 | cg22459052 |
| 236 | cg10071852 | cg03017946 | cg02339793 |
| 237 | cg24976262 | cg00567872 | cg21546522 |
| 238 | cg01677310 | cg22803510 | cg12727940 |
| 239 | cg00927364 | cg19051802 | cg16205958 |
| 240 | cg26638069 | cg18854004 | cg09304617 |
| 241 | cg15226226 | cg16185457 | cg15089181 |
| 242 | cg06460400 | cg13488220 | cg04232282 |
| 243 | cg24426483 | cg10886334 | cg19856705 |
| 244 | cg11432630 | cg08091050 | cg00944304 |
| 245 | cg05800368 | cg07529658 | cg13447933 |
| 246 | cg23750338 | cg06748078 | cg15582707 |
| 247 | cg07349899 | cg26180843 | cg23058246 |
| 248 | cg14843670 | cg24073994 | cg00673191 |
| 249 | cg08007899 | cg23687021 | cg27390206 |
| 250 | cg00841141 | cg27226424 | cg07281938 |
| 251 | cg08613144 | cg26882115 | cg08726900 |
| 252 | cg06436667 | cg20934096 | cg25287071 |
| 253 | cg04771901 | cg15063366 | cg07793033 |
| 254 | cg26267483 | cg09421126 | cg23910341 |
| 255 | cg01260603 | cg07818422 | cg24750887 |
| 256 | cg23929809 | cg04555379 | cg21870038 |
| 257 | cg00051546 | cg03840920 | cg27092594 |
| 258 | cg01483824 | cg25430713 | cg19784198 |
| 259 | cg10667102 | cg22644984 | cg21351483 |
| 260 | cg19643097 | cg10713589 | cg07921503 |
| 261 | cg01696984 | cg03444965 | cg11960033 |
| 262 | cg03640756 | cg03216506 | cg14655905 |

|     |            |            |            |
|-----|------------|------------|------------|
| 263 | cg06344576 | cg00058291 | cg18645642 |
| 264 | cg09796786 | cg24787929 | cg25846061 |
| 265 | cg16056849 | cg20139145 | cg20027784 |
| 266 | cg24773418 | cg08775793 | cg14571537 |
| 267 | cg04774930 | cg00542261 | cg14628049 |
| 268 | cg03812676 | cg23920016 | cg03400491 |
| 269 | cg13093023 | cg23664774 | cg01103253 |
| 270 | cg26927190 | cg23300494 | cg27331828 |
| 271 | cg07433453 | cg18765405 | cg04601090 |
| 272 | cg01613294 | cg11553311 | cg25061701 |
| 273 | cg03659476 | cg03938353 | cg10227280 |
| 274 | cg03077533 | cg03861097 | cg13838713 |
| 275 | cg11450827 | cg25692669 | cg03614132 |
| 276 | cg09185884 | cg20122645 | cg24635581 |
| 277 | cg15712057 | cg19220272 | cg00994389 |
| 278 | cg08749443 | cg08377924 | cg04403415 |
| 279 | cg22605643 | cg06436663 | cg26215113 |
| 280 | cg04196068 | cg02124957 | cg15862380 |
| 281 | cg13637654 | cg27489873 | cg05552543 |
| 282 | cg03953506 | cg24408316 | cg09421126 |
| 283 | cg04716580 | cg22286382 | cg10037894 |
| 284 | cg11135937 | cg17778120 | cg08577953 |
| 285 | cg00949635 | cg10907727 | cg07275305 |
| 286 | cg05547140 | cg09829263 | cg03606646 |
| 287 | cg02622601 | cg05982473 | cg11320499 |
| 288 | cg05305993 | cg04804648 | cg17578309 |
| 289 | cg10091866 | cg01303480 | cg06200670 |
| 290 | cg16459391 | cg25270886 | cg10899681 |
| 291 | cg12843033 | cg24647108 | cg18369990 |
| 292 | cg24319076 | cg22593342 | cg12302797 |
| 293 | cg16812352 | cg13496979 | cg26572651 |
| 294 | cg22152438 | cg09665571 | cg06746318 |
| 295 | cg18766210 | cg03999452 | cg05116002 |
| 296 | cg08257212 | cg01753263 | cg18766210 |
| 297 | cg01697623 | cg01013023 | cg22161706 |
| 298 | cg15363973 | cg15553612 | cg16366639 |
| 299 | cg07917127 | cg13734860 | cg17152266 |
| 300 | cg07099056 | cg06400255 | cg26726230 |
| 301 | cg24970620 | cg01824933 | cg23973885 |
| 302 | cg23237976 | cg25900150 | cg07044414 |
| 303 | cg01385157 | cg24870688 | cg23207527 |
| 304 | cg15127702 | cg20700977 | cg18244708 |
| 305 | cg01546047 | cg18375421 | cg11869499 |
| 306 | cg04188241 | cg10409799 | cg15451258 |
| 307 | cg10439859 | cg04009429 | cg11685391 |
| 308 | cg16516980 | cg03285823 | cg11051022 |
| 309 | cg22118369 | cg00732878 | cg00512872 |
| 310 | cg23301539 | cg23058673 | cg10607603 |
| 311 | cg01462184 | cg14419424 | cg04110886 |
| 312 | cg18965086 | cg12948543 | cg06579465 |
| 313 | cg00478851 | cg11958644 | cg18207099 |
| 314 | cg03291336 | cg05468559 | cg16026813 |
| 315 | cg13070215 | cg02926747 | cg25102842 |

|     |            |            |            |
|-----|------------|------------|------------|
| 316 | cg14003974 | cg01345395 | cg12312338 |
| 317 | cg01640684 | cg17693222 | cg01357897 |
| 318 | cg13439189 | cg14935206 | cg17130544 |
| 319 | cg03401464 | cg05196820 | cg26169991 |
| 320 | cg04867652 | cg03393445 | cg03023681 |
| 321 | cg22370005 | cg00412775 | cg15299233 |
| 322 | cg21613549 | cg22871566 | cg25723217 |
| 323 | cg23024810 | cg00290626 | cg25941751 |
| 324 | cg05931119 | cg21035368 | cg00903438 |
| 325 | cg19706515 | cg18238763 | cg16625770 |
| 326 | cg15081886 | cg12389888 | cg03161498 |
| 327 | cg19767562 | cg11391732 | cg00223767 |
| 328 | cg17539235 | cg10202788 | cg13916835 |
| 329 | cg27540799 | cg09322899 | cg06752482 |
| 330 | cg02047646 | cg06618764 | cg08527124 |
| 331 | cg19702383 | cg06084403 | cg02137970 |
| 332 | cg06891043 | cg05547140 | cg11637968 |
| 333 | cg06591973 | cg04914198 | cg22854448 |
| 334 | cg07295362 | cg04819655 | cg05403316 |
| 335 | cg06297857 | cg00651497 | cg19308185 |
| 336 | cg04324917 | cg22376204 | cg21756765 |
| 337 | cg04398282 | cg15225991 | cg07720334 |
| 338 | cg00358023 | cg14890730 | cg04425005 |
| 339 | cg25940447 | cg10979364 | cg15250073 |
| 340 | cg01602730 | cg06675951 | cg14558880 |
| 341 | cg17518949 | cg00806009 | cg20354777 |
| 342 | cg22173510 | cg19313353 | cg10512089 |
| 343 | cg19382808 | cg19047670 | cg24706505 |
| 344 | cg22472304 | cg15506281 | cg12847536 |
| 345 | cg21887193 | cg14742341 | cg15815827 |
| 346 | cg07811002 | cg14101193 | cg21118367 |
| 347 | cg05445244 | cg13397568 | cg13352836 |
| 348 | cg05755441 | cg13374528 | cg24982682 |
| 349 | cg18203044 | cg09425164 | cg11650648 |
| 350 | cg14231959 | cg06819431 | cg07155331 |
| 351 | cg09646934 | cg05951828 | cg06407371 |
| 352 | cg07281938 | cg04729730 | cg20540235 |
| 353 | cg08476843 | cg01306824 | cg25005357 |
| 354 | cg21569714 | cg01170069 | cg00904578 |
| 355 | cg15460348 | cg00549561 | cg01589353 |
| 356 | cg17046776 | cg00095326 | cg06385449 |
| 357 | cg07010552 | cg00095259 | cg07385220 |
| 358 | cg04568492 | cg27007717 | cg07630327 |
| 359 | cg24697460 | cg23873200 | cg02767093 |
| 360 | cg14207326 | cg22451265 | cg08847512 |
| 361 | cg04060308 | cg18965086 | cg02817932 |
| 362 | cg14468090 | cg16167741 | cg01166827 |
| 363 | cg15941159 | cg13849495 | cg17939585 |
| 364 | cg27643147 | cg12413156 | cg09548893 |
| 365 | cg14375387 | cg10059410 | cg15646741 |
| 366 | cg14507658 | cg09777637 | cg25310555 |
| 367 | cg00994984 | cg08841613 | cg23779478 |
| 368 | cg02068351 | cg03315432 | cg27381488 |

|     |            |            |            |
|-----|------------|------------|------------|
| 369 | cg17654747 | cg26784106 | cg06225767 |
| 370 | cg08727428 | cg19827875 | cg16204524 |
| 371 | cg12245876 | cg09534872 | cg04604708 |
| 372 | cg08002981 | cg07041720 | cg03452625 |
| 373 | cg11360860 | cg05386977 | cg02013841 |
| 374 | cg22987116 | cg03482221 | cg26552621 |
| 375 | cg13411507 | cg01487195 | cg14213430 |
| 376 | cg10997906 | cg27095984 | cg14195992 |
| 377 | cg13170807 | cg23533073 | cg00876376 |
| 378 | cg25364972 | cg23493018 | cg12416830 |
| 379 | cg18766468 | cg21658153 | cg13611006 |
| 380 | cg03743074 | cg19770671 | cg25312122 |
| 381 | cg05201312 | cg19340420 | cg21642054 |
| 382 | cg13035910 | cg18560638 | cg08571020 |
| 383 | cg19702397 | cg17024719 | cg14599015 |
| 384 | cg08273640 | cg15592324 | cg22666103 |
| 385 | cg13367537 | cg12700788 | cg16996242 |
| 386 | cg23539494 | cg11960033 | cg14753356 |
| 387 | cg11319760 | cg10664272 | cg14583973 |
| 388 | cg08843756 | cg08619651 | cg04381888 |
| 389 | cg24407065 | cg08248600 | cg02937548 |
| 390 | cg25650076 | cg04727924 | cg09892984 |
| 391 | cg05797224 | cg03779973 | cg06943385 |
| 392 | cg23486701 | cg03667405 | cg01456030 |
| 393 | cg21616243 | cg02003272 | cg05201300 |
| 394 | cg19418951 | cg00860425 | cg25084760 |
| 395 | cg00767010 | cg00001809 | cg07552087 |
| 396 | cg16976520 | cg26566236 | cg01749725 |
| 397 | cg00360324 | cg24590353 | cg04967410 |
| 398 | cg26888672 | cg18120259 | cg05798126 |
| 399 | cg12669088 | cg13808641 | cg17174566 |
| 400 | cg18617669 | cg12688942 | cg20338754 |
| 401 | cg01780685 | cg09331409 | cg24212268 |
| 402 | cg01983725 | cg07324116 | cg22016731 |
| 403 | cg03439687 | cg05832823 | cg00711291 |
| 404 | cg03163819 | cg00248856 | cg15899800 |
| 405 | cg21650861 | cg27073311 | cg14811011 |
| 406 | cg04784315 | cg25471740 | cg12422551 |
| 407 | cg27076552 | cg25287071 | cg21235119 |
| 408 | cg16936094 | cg24993140 | cg17036007 |
| 409 | cg05575733 | cg12494355 | cg01581360 |
| 410 | cg09725874 | cg12210305 | cg25249728 |
| 411 | cg15411034 | cg11631173 | cg12657297 |
| 412 | cg27278001 | cg07344990 | cg10237442 |
| 413 | cg07654843 | cg04944177 | cg04707715 |
| 414 | cg19714865 | cg01437411 | cg27202913 |
| 415 | cg05139219 | cg00967711 | cg26362368 |
| 416 | cg12293340 | cg23005227 | cg16523645 |
| 417 | cg19784013 | cg16597437 | cg27498434 |
| 418 | cg00089486 | cg15416179 | cg08824291 |
| 419 | cg16158296 | cg14870461 | cg01824933 |
| 420 | cg13299824 | cg11231069 | cg23939642 |
| 421 | cg05488981 | cg06927900 | cg20252837 |



|     |            |            |            |
|-----|------------|------------|------------|
| 422 | cg20387087 | cg00277804 | cg06212582 |
| 423 | cg10244706 | cg00223767 | cg09510085 |
| 424 | cg06024540 | cg26705574 | cg15543534 |
| 425 | cg25019378 | cg22964758 | cg23887149 |
| 426 | cg00232535 | cg21163717 | cg01653532 |
| 427 | cg07818422 | cg20197694 | cg18854872 |
| 428 | cg05274056 | cg17903316 | cg17865371 |
| 429 | cg20154222 | cg13863769 | cg00810292 |
| 430 | cg20383521 | cg13798270 | cg17781669 |
| 431 | cg09335911 | cg12186219 | cg23835923 |
| 432 | cg16625770 | cg11248182 | cg11772801 |
| 433 | cg15991104 | cg10149870 | cg17185710 |
| 434 | cg14425914 | cg08345465 | cg15862394 |
| 435 | cg08092318 | cg07630327 | cg27549186 |
| 436 | cg00688539 | cg03380645 | cg08825895 |
| 437 | cg01077618 | cg02827132 | cg23339720 |
| 438 | cg02452418 | cg26995244 | cg01871631 |
| 439 | cg15963326 | cg21526773 | cg23313005 |
| 440 | cg24870688 | cg21450547 | cg27200466 |
| 441 | cg15326069 | cg21292981 | cg05041265 |
| 442 | cg25568066 | cg16564132 | cg26697605 |
| 443 | cg21475076 | cg14602839 | cg09015905 |
| 444 | cg22256482 | cg13297120 | cg09912552 |
| 445 | cg18819574 | cg12669088 | cg08777316 |
| 446 | cg08863422 | cg11405458 | cg25984524 |
| 447 | cg26754071 | cg09142595 | cg05825120 |
| 448 | cg23748751 | cg08469834 | cg14879279 |
| 449 | cg15082028 | cg05185926 | cg18710162 |
| 450 | cg03030665 | cg05088605 | cg07412315 |
| 451 | cg22422264 | cg02878891 | cg08566548 |
| 452 | cg09746044 | cg02157052 | cg04312967 |
| 453 | cg04260307 | cg27177983 | cg02372856 |
| 454 | cg04195543 | cg26529094 | cg10174683 |
| 455 | cg10458392 | cg24783499 | cg07888884 |
| 456 | cg24960799 | cg24747239 | cg10963218 |
| 457 | cg08877591 | cg24215159 | cg19745930 |
| 458 | cg09603024 | cg19573208 | cg04911180 |
| 459 | cg25684961 | cg16161135 | cg17721879 |
| 460 | cg24899558 | cg13366501 | cg11046030 |
| 461 | cg20494661 | cg12832726 | cg22021794 |
| 462 | cg22463097 | cg12072024 | cg07038689 |
| 463 | cg09278623 | cg10546888 | cg14412134 |
| 464 | cg08642081 | cg10239163 | cg16102778 |
| 465 | cg19549465 | cg10129154 | cg19988492 |
| 466 | cg14553765 | cg09861034 | cg14919455 |
| 467 | cg07622079 | cg09009788 | cg23100428 |
| 468 | cg11390504 | cg08094614 | cg20861822 |
| 469 | cg20924972 | cg06900571 | cg06849167 |
| 470 | cg14320530 | cg04911680 | cg17787876 |
| 471 | cg18583276 | cg03038245 | cg00863893 |
| 472 | cg14431528 | cg02607972 | cg03999452 |
| 473 | cg09279803 | cg00916659 | cg08258867 |
| 474 | cg05226061 | cg27110374 | cg12167489 |

|     |            |            |            |
|-----|------------|------------|------------|
| 475 | cg19621160 | cg26932693 | cg08141395 |
| 476 | cg06943845 | cg26929355 | cg02806704 |
| 477 | cg11016151 | cg22528270 | cg06389574 |
| 478 | cg24990238 | cg21393818 | cg19783160 |
| 479 | cg14935206 | cg21105227 | cg27565803 |
| 480 | cg00748072 | cg16570314 | cg07094487 |
| 481 | cg24939470 | cg11661534 | cg19736117 |
| 482 | cg00259518 | cg07283582 | cg06098693 |
| 483 | cg24018760 | cg07021447 | cg03036214 |
| 484 | cg14095283 | cg05477920 | cg20449048 |
| 485 | cg15351186 | cg05364072 | cg13782615 |
| 486 | cg21698310 | cg03512577 | cg21252105 |
| 487 | cg02658272 | cg01349691 | cg25881985 |
| 488 | cg06927900 | cg23525541 | cg06344576 |
| 489 | cg19432283 | cg21735516 | cg20792436 |
| 490 | cg08386696 | cg19747992 | cg02835462 |
| 491 | cg03044471 | cg18527971 | cg22731190 |
| 492 | cg27302539 | cg17901582 | cg24233679 |
| 493 | cg06853455 | cg17853850 | cg21670987 |
| 494 | cg06390613 | cg16820411 | cg00581541 |
| 495 | cg06037365 | cg13165992 | cg06853455 |
| 496 | cg10225755 | cg13115424 | cg08390994 |
| 497 | cg23953820 | cg12245876 | cg24175188 |
| 498 | cg26397391 | cg10676125 | cg03991106 |
| 499 | cg21105227 | cg10611016 | cg23854567 |
| 500 | cg05966641 | cg04386759 | cg12076543 |
| 501 | cg26308909 | cg04234758 | cg03621841 |
| 502 | cg01716084 | cg03604011 | cg16636756 |
| 503 | cg20341998 | cg01467882 | cg16812352 |
| 504 | cg25921543 | cg24738036 | cg27566403 |
| 505 | cg18761976 | cg24002003 | cg15033511 |
| 506 | cg06547766 | cg21648069 | cg03872934 |
| 507 | cg01872216 | cg20951650 | cg03818193 |
| 508 | cg13216372 | cg20138711 | cg18327695 |
| 509 | cg09028132 | cg15959893 | cg23925540 |
| 510 | cg15353597 | cg14978242 | cg22700848 |
| 511 | cg03495660 | cg09957712 | cg22786667 |
| 512 | cg06443231 | cg09631175 | cg02644867 |
| 513 | cg01675694 | cg09604238 | cg15188939 |
| 514 | cg18888464 | cg05999324 | cg08304608 |
| 515 | cg21546226 | cg01501896 | cg14350114 |
| 516 | cg07990390 | cg01380319 | cg05251593 |
| 517 | cg16349616 | cg00610205 | cg20316440 |
| 518 | cg25013838 | cg00083399 | cg10820904 |
| 519 | cg16205958 | cg25888386 | cg18061711 |
| 520 | cg07050626 | cg25355635 | cg19621160 |
| 521 | cg06186808 | cg22798362 | cg00937742 |
| 522 | cg14360029 | cg20010135 | cg01442620 |
| 523 | cg13951223 | cg19063061 | cg01818539 |
| 524 | cg02935097 | cg18763720 | cg12233100 |
| 525 | cg19016264 | cg18465694 | cg10149889 |
| 526 | cg02882004 | cg18397308 | cg18120259 |
| 527 | cg14628049 | cg14523734 | cg13488013 |

|     |            |            |            |
|-----|------------|------------|------------|
| 528 | cg13681684 | cg14330078 | cg18233538 |
| 529 | cg06887283 | cg14003974 | cg24365837 |
| 530 | cg24335984 | cg08966413 | cg08913523 |
| 531 | cg08412188 | cg05798126 | cg25596405 |
| 532 | cg22451412 | cg00421693 | cg15259233 |
| 533 | cg04838832 | cg25227364 | cg21268578 |
| 534 | cg05269678 | cg22365446 | cg06660116 |
| 535 | cg19182035 | cg21377260 | cg08113187 |
| 536 | cg14569423 | cg21246624 | cg14521421 |
| 537 | cg07927953 | cg19921577 | cg11546709 |
| 538 | cg10152624 | cg19382808 | cg06422467 |
| 539 | cg24630426 | cg16700555 | cg26927190 |
| 540 | cg14565781 | cg15451258 | cg16936094 |
| 541 | cg23732483 | cg08897688 | cg18011099 |
| 542 | cg07104557 | cg08866865 | cg13223682 |
| 543 | cg20323175 | cg00631702 | cg05705335 |
| 544 | cg04070601 | cg26638069 | cg26326208 |
| 545 | cg03654273 | cg26315221 | cg12762413 |
| 546 | cg26171489 | cg24987440 | cg09950920 |
| 547 | cg05986052 | cg24175188 | cg04143348 |
| 548 | cg24631518 | cg20418529 | cg11143193 |
| 549 | cg19921577 | cg19450111 | cg07716847 |
| 550 | cg07027613 | cg18474180 | cg06618764 |
| 551 | cg13343549 | cg13556624 | cg23468002 |
| 552 | cg15889057 | cg13070215 | cg09029193 |
| 553 | cg11253592 | cg11700356 | cg08934799 |
| 554 | cg20591120 | cg10884953 | cg22255690 |
| 555 | cg10472711 | cg09725874 | cg08110337 |
| 556 | cg09597070 | cg08236537 | cg25841625 |
| 557 | cg08695912 | cg07917127 | cg27571329 |
| 558 | cg20609679 | cg07706695 | cg04993279 |
| 559 | cg06925389 | cg05977276 | cg15121417 |
| 560 | cg24164238 | cg04926380 | cg05288253 |
| 561 | cg21628927 | cg23777946 | cg21048763 |
| 562 | cg07925587 | cg22397446 | cg13694343 |
| 563 | cg23415916 | cg21818807 | cg06817454 |
| 564 | cg26745294 | cg20256649 | cg06833798 |
| 565 | cg13582959 | cg16794682 | cg22700246 |
| 566 | cg08205361 | cg15063355 | cg10461264 |
| 567 | cg12846837 | cg14971998 | cg13721589 |
| 568 | cg13620881 | cg12595461 | cg14884828 |
| 569 | cg06116260 | cg10642094 | cg04273604 |
| 570 | cg03798162 | cg10052840 | cg18280717 |
| 571 | cg27483571 | cg08559648 | cg06267617 |
| 572 | cg07038689 | cg08489478 | cg08774694 |
| 573 | cg02102684 | cg07749442 | cg09901529 |
| 574 | cg05399244 | cg07309864 | cg23974819 |
| 575 | cg17696194 | cg05204104 | cg10859133 |
| 576 | cg11902934 | cg03040489 | cg11786870 |
| 577 | cg17221945 | cg27067922 | cg12459932 |
| 578 | cg22920258 | cg26379230 | cg26810214 |
| 579 | cg11861709 | cg24059075 | cg26884345 |
| 580 | cg09036558 | cg23682934 | cg14330078 |

|     |            |            |            |
|-----|------------|------------|------------|
| 581 | cg05330056 | cg20686479 | cg05977523 |
| 582 | cg12612065 | cg20227592 | cg22330533 |
| 583 | cg01710084 | cg19702397 | cg00901982 |
| 584 | cg16965936 | cg18601229 | cg17250537 |
| 585 | cg06259664 | cg14671764 | cg04074404 |
| 586 | cg01185921 | cg13915179 | cg27295434 |
| 587 | cg17307791 | cg12448664 | cg17755483 |
| 588 | cg18645642 | cg10897631 | cg24298539 |
| 589 | cg00035074 | cg10091866 | cg23545258 |
| 590 | cg01788682 | cg10089081 | cg02838178 |
| 591 | cg01012242 | cg09669930 | cg12106976 |
| 592 | cg19756253 | cg07900344 | cg20090290 |
| 593 | cg12503110 | cg06255609 | cg03318904 |
| 594 | cg00106093 | cg05705335 | cg24065957 |
| 595 | cg19295314 | cg04260307 | cg18938534 |
| 596 | cg06890747 | cg03589898 | cg21936959 |
| 597 | cg06363129 | cg02595280 | cg10109635 |
| 598 | cg00216061 | cg02579022 | cg23881119 |
| 599 | cg05750926 | cg01691522 | cg11307417 |
| 600 | cg02961196 | cg27044641 | cg01791238 |
| 601 | cg04624413 | cg25138553 | cg07265549 |
| 602 | cg04685302 | cg22700848 | cg04248332 |
| 603 | cg01835489 | cg20586531 | cg25634000 |
| 604 | cg12878382 | cg18253910 | cg00444740 |
| 605 | cg20137237 | cg17825194 | cg20418529 |
| 606 | cg01239666 | cg17638841 | cg15275017 |
| 607 | cg09646558 | cg17475200 | cg05202347 |
| 608 | cg11367404 | cg16863382 | cg21442998 |
| 609 | cg14437446 | cg15016233 | cg02697979 |
| 610 | cg20461270 | cg12183501 | cg01154505 |
| 611 | cg15161854 | cg11215918 | cg21546226 |
| 612 | cg08124923 | cg10921702 | cg00548009 |
| 613 | cg15410236 | cg10472711 | cg07483007 |
| 614 | cg10860364 | cg10299941 | cg23049226 |
| 615 | cg00372132 | cg07379550 | cg08476843 |
| 616 | cg02346135 | cg06856329 | cg07938459 |
| 617 | cg18905668 | cg06257110 | cg08687995 |
| 618 | cg05664352 | cg05623411 | cg12143499 |
| 619 | cg22663660 | cg04025970 | cg17415355 |
| 620 | cg09900084 | cg03962809 | cg18109289 |
| 621 | cg00656603 | cg03800922 | cg26835798 |
| 622 | cg25883020 | cg03421440 | cg19553402 |
| 623 | cg13517605 | cg03031526 | cg17884766 |
| 624 | cg08625996 | cg02829279 | cg19802929 |
| 625 | cg21925748 | cg27495643 | cg11728201 |
| 626 | cg24365837 | cg25463863 | cg17444479 |
| 627 | cg02725453 | cg24158160 | cg15226226 |
| 628 | cg06815308 | cg19956769 | cg13332142 |
| 629 | cg19240021 | cg19444998 | cg19133023 |
| 630 | cg06825317 | cg18435870 | cg09534872 |
| 631 | cg25521853 | cg16205958 | cg14313184 |
| 632 | cg06513888 | cg15988734 | cg11025609 |
| 633 | cg13287523 | cg15074047 | cg16060382 |

|     |            |            |            |
|-----|------------|------------|------------|
| 634 | cg26929355 | cg14789529 | cg04091816 |
| 635 | cg05376267 | cg14202146 | cg05032848 |
| 636 | cg16074271 | cg14190344 | cg21156057 |
| 637 | cg04213390 | cg13348246 | cg09631059 |
| 638 | cg08110337 | cg12642717 | cg20608966 |
| 639 | cg23052758 | cg10508317 | cg27627006 |
| 640 | cg22866068 | cg09279803 | cg03006477 |
| 641 | cg09450022 | cg08364860 | cg23748172 |
| 642 | cg04091816 | cg06989443 | cg10493436 |
| 643 | cg23235334 | cg06012410 | cg03218909 |
| 644 | cg06483517 | cg05017639 | cg25658272 |
| 645 | cg19525780 | cg04158792 | cg00937817 |
| 646 | cg07124859 | cg03571927 | cg07844828 |
| 647 | cg19081470 | cg00039385 | cg16712866 |
| 648 | cg13274107 | cg24706505 | cg24941195 |
| 649 | cg18532070 | cg21201494 | cg08806632 |
| 650 | cg09666417 | cg20757748 | cg03604011 |
| 651 | cg01441113 | cg20133730 | cg14747072 |
| 652 | cg17854510 | cg18957751 | cg12895304 |
| 653 | cg01399475 | cg18533833 | cg07749442 |
| 654 | cg14651518 | cg17920820 | cg05139187 |
| 655 | cg07438999 | cg16681083 | cg02066441 |
| 656 | cg03892631 | cg15547344 | cg01411786 |
| 657 | cg10654373 | cg14865516 | cg00123090 |
| 658 | cg22846966 | cg13680246 | cg03417340 |
| 659 | cg02829279 | cg13655570 | cg21377260 |
| 660 | cg25445431 | cg12395479 | cg09837656 |
| 661 | cg07541559 | cg10865444 | cg23378722 |
| 662 | cg20999795 | cg10802680 | cg26689934 |
| 663 | cg11423998 | cg10380108 | cg18801945 |
| 664 | cg08661751 | cg09165170 | cg16602460 |
| 665 | cg09165170 | cg07733851 | cg13618880 |
| 666 | cg09745791 | cg07555102 | cg11490961 |
| 667 | cg17375396 | cg04919234 | cg09537038 |
| 668 | cg04149585 | cg02418175 | cg19683675 |
| 669 | cg03101492 | cg02247300 | cg04771901 |
| 670 | cg23304923 | cg00948274 | cg04607323 |
| 671 | cg19216851 | cg00257455 | cg06827256 |
| 672 | cg13413247 | cg00118783 | cg00449021 |
| 673 | cg08910524 | cg27506609 | cg04397652 |
| 674 | cg16060382 | cg26092233 | cg14820213 |
| 675 | cg10990188 | cg24424381 | cg09665571 |
| 676 | cg22822048 | cg23818351 | cg15536947 |
| 677 | cg07520608 | cg20435464 | cg11818853 |
| 678 | cg07398661 | cg20005923 | cg18652285 |
| 679 | cg23348723 | cg19849641 | cg23663547 |
| 680 | cg09307742 | cg18280717 | cg04972957 |
| 681 | cg14839134 | cg17152266 | cg08115732 |
| 682 | cg25498969 | cg16996242 | cg22780675 |
| 683 | cg10925829 | cg16488544 | cg24158160 |
| 684 | cg09526469 | cg15613048 | cg23936766 |
| 685 | cg08836729 | cg15127656 | cg16411103 |
| 686 | cg21450652 | cg13425135 | cg04140971 |

|     |            |            |            |
|-----|------------|------------|------------|
| 687 | cg27222884 | cg12614090 | cg26313421 |
| 688 | cg26124719 | cg12552626 | cg05242371 |
| 689 | cg13971603 | cg11030811 | cg16766632 |
| 690 | cg09520904 | cg11010976 | cg07236781 |
| 691 | cg13877631 | cg10977734 | cg16213787 |
| 692 | cg04508114 | cg10803714 | cg23172911 |
| 693 | cg23244877 | cg10634182 | cg01399475 |
| 694 | cg27051683 | cg10109635 | cg02138124 |
| 695 | cg06292709 | cg08115297 | cg21497060 |
| 696 | cg10809958 | cg07346310 | cg25532627 |
| 697 | cg23632333 | cg07197326 | cg22918700 |
| 698 | cg22257056 | cg07044414 | cg00699693 |
| 699 | cg07915976 | cg05041265 | cg20386404 |
| 700 | cg16649474 | cg04661959 | cg20230305 |
| 701 | cg07156006 | cg03495832 | cg12710648 |
| 702 | cg01993468 | cg02867857 | cg07577837 |
| 703 | cg11722816 | cg01448551 | cg23019935 |
| 704 | cg13385220 | cg00968638 | cg07713495 |
| 705 | cg01783960 | cg00904578 | cg24993140 |
| 706 | cg11497526 | cg27641240 | cg25552843 |
| 707 | cg03379631 | cg24845165 | cg07088950 |
| 708 | cg09276451 | cg24594604 | cg17327331 |
| 709 | cg04819655 | cg24024036 | cg16078863 |
| 710 | cg24541176 | cg23344121 | cg05279866 |
| 711 | cg16519668 | cg22099441 | cg20679271 |
| 712 | cg00713247 | cg17945541 | cg16829042 |
| 713 | cg25028527 | cg16759204 | cg21196487 |
| 714 | cg11490944 | cg15684702 | cg16277214 |
| 715 | cg06792186 | cg13251842 | cg14606082 |
| 716 | cg23019935 | cg12866104 | cg24148817 |
| 717 | cg24034465 | cg12093620 | cg12728588 |
| 718 | cg05718035 | cg09330834 | cg12204166 |
| 719 | cg02522196 | cg08688659 | cg05204104 |
| 720 | cg00158770 | cg08605965 | cg08850243 |
| 721 | cg18539086 | cg07795346 | cg03573679 |
| 722 | cg03784886 | cg07079828 | cg04058399 |
| 723 | cg21945949 | cg06755413 | cg00559439 |
| 724 | cg01414464 | cg06377278 | cg03131767 |
| 725 | cg01380319 | cg06142351 | cg04157865 |
| 726 | cg12053105 | cg05595469 | cg06070445 |
| 727 | cg06813419 | cg05109049 | cg11815072 |
| 728 | cg19513582 | cg02862467 | cg26899399 |
| 729 | cg27117828 | cg00322201 | cg09036558 |
| 730 | cg24462247 | cg26960083 | cg13068653 |
| 731 | cg01207974 | cg26547741 | cg19541247 |
| 732 | cg12927715 | cg26383057 | cg26734040 |
| 733 | cg22180848 | cg26064794 | cg10082445 |
| 734 | cg09935792 | cg24738592 | cg08677210 |
| 735 | cg23125506 | cg23217547 | cg05376267 |
| 736 | cg10677144 | cg22076676 | cg13657981 |
| 737 | cg13863769 | cg20418769 | cg01272202 |
| 738 | cg04919234 | cg20167126 | cg24044501 |
| 739 | cg09230938 | cg19799865 | cg25974922 |

|     |            |            |            |
|-----|------------|------------|------------|
| 740 | cg09175915 | cg19683675 | cg27042523 |
| 741 | cg15891850 | cg19190487 | cg22979433 |
| 742 | cg07385490 | cg17601658 | cg05380734 |
| 743 | cg01077713 | cg15364618 | cg07165066 |
| 744 | cg05091570 | cg15016740 | cg04805065 |
| 745 | cg22946562 | cg14218838 | cg22380476 |
| 746 | cg02928110 | cg14159036 | cg05945030 |
| 747 | cg16826504 | cg14001518 | cg25095994 |
| 748 | cg21108851 | cg13008252 | cg17169982 |
| 749 | cg27409974 | cg12312338 | cg13724812 |
| 750 | cg11772801 | cg10223066 | cg08185095 |
| 751 | cg12117658 | cg09334629 | cg13857210 |
| 752 | cg27394987 | cg06937205 | cg01356198 |
| 753 | cg21973907 | cg06825317 | cg09884107 |
| 754 | cg26828494 | cg06363798 | cg14096042 |
| 755 | cg22890571 | cg05242371 | cg06251016 |
| 756 | cg08154963 | cg04482110 | cg14700524 |
| 757 | cg27578381 | cg04384810 | cg17107017 |
| 758 | cg24249775 | cg03538436 | cg00464814 |
| 759 | cg00001809 | cg03053456 | cg06812840 |
| 760 | cg00008452 | cg02882004 | cg12727138 |
| 761 | cg00013441 | cg02522196 | cg05900955 |
| 762 | cg00017461 | cg02226672 | cg21095280 |
| 763 | cg00027650 | cg01663970 | cg27521744 |
| 764 | cg00027990 | cg01079658 | cg06786153 |
| 765 | cg00028338 | cg01014262 | cg23337031 |
| 766 | cg00035923 | cg00627347 | cg16640450 |
| 767 | cg00038342 | cg00449021 | cg19815596 |
| 768 | cg00039385 | cg27339974 | cg14758740 |
| 769 | cg00043005 | cg27051683 | cg00549561 |
| 770 | cg00044665 | cg26873164 | cg08276755 |
| 771 | cg00047338 | cg26308909 | cg15756507 |
| 772 | cg00050289 | cg25950520 | cg14096074 |
| 773 | cg00054496 | cg25408950 | cg14242936 |
| 774 | cg00058291 | cg24899558 | cg15104081 |
| 775 | cg00059024 | cg22529541 | cg23999526 |
| 776 | cg00060715 | cg21397287 | cg13472900 |
| 777 | cg00061185 | cg20675852 | cg01356872 |
| 778 | cg00070460 | cg20230305 | cg11982525 |
| 779 | cg00074348 | cg20147164 | cg11576424 |
| 780 | cg00083399 | cg20072162 | cg01691710 |
| 781 | cg00085256 | cg19332409 | cg06607764 |
| 782 | cg00086171 | cg18653451 | cg03074188 |
| 783 | cg00091004 | cg18247852 | cg22108360 |
| 784 | cg00095259 | cg17599809 | cg10239163 |
| 785 | cg00095326 | cg17528003 | cg18939081 |
| 786 | cg00096810 | cg17444642 | cg02235663 |
| 787 | cg00103778 | cg17378535 | cg25568066 |
| 788 | cg00118317 | cg17107017 | cg13447099 |
| 789 | cg00118783 | cg16776331 | cg13496979 |
| 790 | cg00123090 | cg16412000 | cg21854332 |
| 791 | cg00127198 | cg15844895 | cg07613391 |
| 792 | cg00131423 | cg14826031 | cg01761758 |

|     |            |            |            |
|-----|------------|------------|------------|
| 793 | cg00133595 | cg13282594 | cg19439043 |
| 794 | cg00134602 | cg11205589 | cg02249969 |
| 795 | cg00137696 | cg10780981 | cg06856329 |
| 796 | cg00143606 | cg09410453 | cg11703759 |
| 797 | cg00144414 | cg08833741 | cg25654695 |
| 798 | cg00145911 | cg06500727 | cg00127198 |
| 799 | cg00147216 | cg04576568 | cg06376598 |
| 800 | cg00147850 | cg03879386 | cg23344121 |
| 801 | cg00149708 | cg02935097 | cg21893764 |
| 802 | cg00158530 | cg02281970 | cg04784212 |
| 803 | cg00166343 | cg01675694 | cg22663660 |
| 804 | cg00169184 | cg01553584 | cg07612468 |
| 805 | cg00175487 | cg26280578 | cg05194102 |
| 806 | cg00175895 | cg25575145 | cg14024328 |
| 807 | cg00180097 | cg25521853 | cg04145890 |
| 808 | cg00184279 | cg24775327 | cg11263420 |
| 809 | cg00185413 | cg23976336 | cg03038245 |
| 810 | cg00187535 | cg21450652 | cg07308243 |
| 811 | cg00201819 | cg21145938 | cg20000866 |
| 812 | cg00204976 | cg20647485 | cg10617739 |
| 813 | cg00206063 | cg20637405 | cg02793948 |
| 814 | cg00209623 | cg19569551 | cg01352276 |
| 815 | cg00209918 | cg18851831 | cg04113348 |
| 816 | cg00210271 | cg18677603 | cg14406727 |
| 817 | cg00216961 | cg18639238 | cg14136781 |
| 818 | cg00218484 | cg16640008 | cg07925587 |
| 819 | cg00226615 | cg15815827 | cg07268431 |
| 820 | cg00232500 | cg15035360 | cg02481714 |
| 821 | cg00236766 | cg14406727 | cg26978064 |
| 822 | cg00236831 | cg13931531 | cg08400424 |
| 823 | cg00244267 | cg13634090 | cg15618758 |
| 824 | cg00244391 | cg11848157 | cg14362630 |
| 825 | cg00245896 | cg11844358 | cg08784950 |
| 826 | cg00248856 | cg09975561 | cg08149747 |
| 827 | cg00257455 | cg08764162 | cg22782017 |
| 828 | cg00260235 | cg07577837 | cg20566286 |
| 829 | cg00266968 | cg07508304 | cg08701134 |
| 830 | cg00268330 | cg06241044 | cg26639076 |
| 831 | cg00270141 | cg03286742 | cg25807487 |
| 832 | cg00270654 | cg00828762 | cg05590156 |
| 833 | cg00271177 | cg00704869 | cg12452298 |
| 834 | cg00271311 | cg00680875 | cg12669088 |
| 835 | cg00275234 | cg00271311 | cg10439859 |
| 836 | cg00275503 | cg00035074 | cg07824182 |
| 837 | cg00277804 | cg25587431 | cg01767116 |
| 838 | cg00285343 | cg24727133 | cg01559787 |
| 839 | cg00286717 | cg24293145 | cg26573923 |
| 840 | cg00289254 | cg23998645 | cg11046864 |
| 841 | cg00296038 | cg23408990 | cg12005412 |
| 842 | cg00308508 | cg23040685 | cg09989037 |
| 843 | cg00311883 | cg22622667 | cg16529592 |
| 844 | cg00314994 | cg21329649 | cg12448539 |
| 845 | cg00322201 | cg20382418 | cg04293307 |



|     |            |            |            |
|-----|------------|------------|------------|
| 846 | cg00330518 | cg20322433 | cg23777946 |
| 847 | cg00333583 | cg19912309 | cg24541176 |
| 848 | cg00334274 | cg19598713 | cg18120975 |
| 849 | cg00335361 | cg18645642 | cg07410597 |
| 850 | cg00352652 | cg18544888 | cg04706201 |
| 851 | cg00353407 | cg18369325 | cg09801824 |
| 852 | cg00355286 | cg18231184 | cg02238387 |
| 853 | cg00358442 | cg18118490 | cg09650907 |
| 854 | cg00359087 | cg16883145 | cg25352714 |
| 855 | cg00359365 | cg16442814 | cg12503110 |
| 856 | cg00362381 | cg15574810 | cg00590590 |
| 857 | cg00366037 | cg15082028 | cg10803714 |
| 858 | cg00371570 | cg14992217 | cg01837846 |
| 859 | cg00373967 | cg13827597 | cg07900344 |
| 860 | cg00374546 | cg13515351 | cg14553895 |
| 861 | cg00380428 | cg11671925 | cg24453118 |
| 862 | cg00386725 | cg11069071 | cg08682625 |
| 863 | cg00392155 | cg10827460 | cg07662964 |
| 864 | cg00400654 | cg09646934 | cg23903708 |
| 865 | cg00400992 | cg09230938 | cg06741896 |
| 866 | cg00401972 | cg07561338 | cg13643040 |
| 867 | cg00405824 | cg06093152 | cg02227879 |
| 868 | cg00408764 | cg05341539 | cg18560571 |
| 869 | cg00409245 | cg04819180 | cg10338518 |
| 870 | cg00410534 | cg04707715 | cg15425427 |
| 871 | cg00412142 | cg04046364 | cg27365627 |
| 872 | cg00412772 | cg03837909 | cg05150697 |
| 873 | cg00412775 | cg02711397 | cg18677603 |
| 874 | cg00414709 | cg02144874 | cg04070601 |
| 875 | cg00415011 | cg00949635 | cg00651488 |
| 876 | cg00418613 | cg00900735 | cg12744447 |
| 877 | cg00421693 | cg00869582 | cg18703227 |
| 878 | cg00423871 | cg27604702 | cg19770281 |
| 879 | cg00426425 | cg27543578 | cg14231959 |
| 880 | cg00428526 | cg27302301 | cg01546047 |
| 881 | cg00431813 | cg27161027 | cg10588276 |
| 882 | cg00436722 | cg26071556 | cg02369775 |
| 883 | cg00442220 | cg25828334 | cg12070646 |
| 884 | cg00444740 | cg25510609 | cg11288260 |
| 885 | cg00446536 | cg24812143 | cg01361499 |
| 886 | cg00449021 | cg24804060 | cg11363168 |
| 887 | cg00452755 | cg24137774 | cg11609668 |
| 888 | cg00454770 | cg23949216 | cg13431342 |
| 889 | cg00460268 | cg23261343 | cg14833626 |
| 890 | cg00464814 | cg22370005 | cg02901644 |
| 891 | cg00469547 | cg22022181 | cg26231761 |
| 892 | cg00470794 | cg21736854 | cg11961845 |
| 893 | cg00470817 | cg20242065 | cg18960324 |
| 894 | cg00472277 | cg19244553 | cg21658153 |
| 895 | cg00473257 | cg18857655 | cg00998132 |
| 896 | cg00484122 | cg17616283 | cg06556244 |
| 897 | cg00488512 | cg16812352 | cg22189544 |
| 898 | cg00488575 | cg16803044 | cg07990658 |

|     |            |            |            |
|-----|------------|------------|------------|
| 899 | cg00488716 | cg16734433 | cg20072162 |
| 900 | cg00489394 | cg16572603 | cg10811426 |
| 901 | cg00500424 | cg16133703 | cg25623727 |
| 902 | cg00501242 | cg15396800 | cg12058875 |
| 903 | cg00503920 | cg15353597 | cg04034685 |
| 904 | cg00512872 | cg14553895 | cg14201946 |
| 905 | cg00523012 | cg14094409 | cg26800893 |
| 906 | cg00528490 | cg13840520 | cg04356968 |
| 907 | cg00542261 | cg13514778 | cg09437283 |
| 908 | cg00545796 | cg13488851 | cg10248100 |
| 909 | cg00547727 | cg13274107 | cg22151881 |
| 910 | cg00547768 | cg12727940 | cg09457490 |
| 911 | cg00548009 | cg12120430 | cg08883078 |
| 912 | cg00549561 | cg11815790 | cg01385157 |
| 913 | cg00549798 | cg11351841 | cg11341086 |
| 914 | cg00550040 | cg10857774 | cg08749443 |
| 915 | cg00552168 | cg10255535 | cg13840520 |
| 916 | cg00554604 | cg10024484 | cg14178043 |
| 917 | cg00556407 | cg09832108 | cg10709026 |
| 918 | cg00562504 | cg09775533 | cg12075928 |
| 919 | cg00563061 | cg09524639 | cg05982473 |
| 920 | cg00567872 | cg09164574 | cg15364618 |
| 921 | cg00569091 | cg09038962 | cg21374048 |
| 922 | cg00578637 | cg08571020 | cg06784602 |
| 923 | cg00581541 | cg08005460 | cg03040489 |
| 924 | cg00585698 | cg07743919 | cg18935449 |
| 925 | cg00585818 | cg07531248 | cg23049758 |
| 926 | cg00586700 | cg07512971 | cg25854527 |
| 927 | cg00589581 | cg07410597 | cg09811393 |
| 928 | cg00590590 | cg06504636 | cg03501387 |
| 929 | cg00592944 | cg06376426 | cg02344497 |
| 930 | cg00594228 | cg05873568 | cg20067780 |
| 931 | cg00594917 | cg05229802 | cg02836864 |
| 932 | cg00595472 | cg05030450 | cg07803375 |
| 933 | cg00604356 | cg05013912 | cg07041720 |
| 934 | cg00606396 | cg04685228 | cg19799865 |
| 935 | cg00607630 | cg03817675 | cg26177041 |
| 936 | cg00607989 | cg02785870 | cg16077055 |
| 937 | cg00610205 | cg02150714 | cg09256716 |
| 938 | cg00618323 | cg01303236 | cg22871566 |
| 939 | cg00622702 | cg01259126 | cg06033488 |
| 940 | cg00623312 | cg00920668 | cg00334274 |
| 941 | cg00624949 | cg00118317 | cg01120132 |
| 942 | cg00626390 | cg27604101 | cg10604241 |
| 943 | cg00627347 | cg26828839 | cg16479633 |
| 944 | cg00631702 | cg26808779 | cg27560818 |
| 945 | cg00637826 | cg26169991 | cg18436810 |
| 946 | cg00639143 | cg25203627 | cg00216961 |
| 947 | cg00639837 | cg24247537 | cg17722435 |
| 948 | cg00647879 | cg24194998 | cg06340118 |
| 949 | cg00651488 | cg24064506 | cg05909702 |
| 950 | cg00651497 | cg23999526 | cg25461775 |
| 951 | cg00656264 | cg23173517 | cg05426006 |

|      |            |            |            |
|------|------------|------------|------------|
| 952  | cg00656991 | cg23144649 | cg23037644 |
| 953  | cg00657810 | cg20386404 | cg17216243 |
| 954  | cg00663077 | cg19691659 | cg01441113 |
| 955  | cg00665106 | cg18929814 | cg10921702 |
| 956  | cg00667680 | cg18668813 | cg08044294 |
| 957  | cg00669182 | cg17898124 | cg12999366 |
| 958  | cg00669856 | cg16823064 | cg11492886 |
| 959  | cg00670539 | cg16680624 | cg13586038 |
| 960  | cg00673191 | cg15968604 | cg25189808 |
| 961  | cg00674220 | cg15765251 | cg20322433 |
| 962  | cg00675878 | cg13953458 | cg12669271 |
| 963  | cg00676360 | cg13851989 | cg13402847 |
| 964  | cg00677217 | cg13500797 | cg17548735 |
| 965  | cg00681103 | cg12609948 | cg17920820 |
| 966  | cg00686915 | cg12467960 | cg09119854 |
| 967  | cg00694888 | cg11546709 | cg10434728 |
| 968  | cg00699693 | cg09358973 | cg19774846 |
| 969  | cg00701514 | cg08843064 | cg22153312 |
| 970  | cg00701856 | cg07328519 | cg03829194 |
| 971  | cg00704869 | cg07133097 | cg10498921 |
| 972  | cg00706207 | cg07099056 | cg15417249 |
| 973  | cg00707452 | cg06566615 | cg06290096 |
| 974  | cg00710466 | cg05503991 | cg27554156 |
| 975  | cg00711291 | cg05388880 | cg16151538 |
| 976  | cg00711584 | cg04961225 | cg18163092 |
| 977  | cg00713253 | cg04681879 | cg10907727 |
| 978  | cg00713972 | cg04547809 | cg17827670 |
| 979  | cg00715343 | cg03888083 | cg16874347 |
| 980  | cg00718694 | cg03812676 | cg01303055 |
| 981  | cg00718831 | cg03143347 | cg04719721 |
| 982  | cg00729995 | cg02767093 | cg00610577 |
| 983  | cg00732878 | cg00830283 | cg12659065 |
| 984  | cg00738945 | cg00711291 | cg05591270 |
| 985  | cg00742738 | cg00488575 | cg23058673 |
| 986  | cg00747342 | cg27571590 | cg07795968 |
| 987  | cg00750074 | cg27567761 | cg22798362 |
| 988  | cg00753492 | cg27410449 | cg17943672 |
| 989  | cg00755287 | cg27127017 | cg09280800 |
| 990  | cg00757262 | cg26894079 | cg07965110 |
| 991  | cg00757391 | cg26127113 | cg25408950 |
| 992  | cg00757822 | cg25865108 | cg25589001 |
| 993  | cg00760872 | cg25479732 | cg10979364 |
| 994  | cg00765705 | cg25189085 | cg17749384 |
| 995  | cg00776208 | cg24600706 | cg15988734 |
| 996  | cg00777079 | cg24297835 | cg08089518 |
| 997  | cg00784105 | cg23723410 | cg10418812 |
| 998  | cg00785482 | cg23619577 | cg13857933 |
| 999  | cg00786138 | cg23375717 | cg19974227 |
| 1000 | cg00789416 | cg23337031 | cg08688659 |
| 1001 | cg00802617 | cg22058664 | cg04505809 |
| 1002 | cg00806009 | cg19632842 | cg03296204 |
| 1003 | cg00808555 | cg19508622 | cg22964758 |
| 1004 | cg00810292 | cg19360685 | cg13066703 |

|      |            |            |            |
|------|------------|------------|------------|
| 1005 | cg00816182 | cg17650713 | cg21244322 |
| 1006 | cg00818557 | cg17508905 | cg09702334 |
| 1007 | cg00820405 | cg17216243 | cg00405824 |
| 1008 | cg00825317 | cg15895197 | cg18729681 |
| 1009 | cg00827581 | cg15639581 | cg05966978 |
| 1010 | cg00828762 | cg13298379 | cg01176028 |
| 1011 | cg00845883 | cg12522144 | cg19287349 |
| 1012 | cg00851981 | cg12362980 | cg06659338 |
| 1013 | cg00852414 | cg12072973 | cg07270259 |
| 1014 | cg00854594 | cg11695684 | cg08719095 |
| 1015 | cg00857907 | cg10584300 | cg13550401 |
| 1016 | cg00860425 | cg10480329 | cg14003974 |
| 1017 | cg00863271 | cg10371037 | cg23273465 |
| 1018 | cg00863893 | cg10149889 | cg25406657 |
| 1019 | cg00864551 | cg10099813 | cg24812143 |
| 1020 | cg00866186 | cg09911316 | cg21241424 |
| 1021 | cg00869941 | cg09529783 | cg18544888 |
| 1022 | cg00869989 | cg09511662 | cg05370752 |
| 1023 | cg00870269 | cg08920210 | cg04743876 |
| 1024 | cg00872170 | cg08565675 | cg26426334 |
| 1025 | cg00873009 | cg08329113 | cg10102102 |
| 1026 | cg00876376 | cg08291302 | cg07561547 |
| 1027 | cg00876694 | cg07617152 | cg18918538 |
| 1028 | cg00881300 | cg07481273 | cg02338778 |
| 1029 | cg00885461 | cg06561892 | cg26947127 |
| 1030 | cg00890378 | cg05715751 | cg21840948 |
| 1031 | cg00892999 | cg05099221 | cg26460678 |
| 1032 | cg00899463 | cg05016508 | cg02461114 |
| 1033 | cg00899856 | cg02704946 | cg08293102 |
| 1034 | cg00900735 | cg02633600 | cg06109284 |
| 1035 | cg00901982 | cg01848660 | cg16723180 |
| 1036 | cg00902427 | cg26929394 | cg12069547 |
| 1037 | cg00903438 | cg26551200 | cg06580014 |
| 1038 | cg00904122 | cg26452091 | cg22418565 |
| 1039 | cg00904578 | cg26368942 | cg06656553 |
| 1040 | cg00906241 | cg26224624 | cg02867857 |
| 1041 | cg00912277 | cg26070874 | cg07467854 |
| 1042 | cg00916659 | cg26002713 | cg08169341 |
| 1043 | cg00918130 | cg25938735 | cg26350921 |
| 1044 | cg00919689 | cg24734735 | cg01678309 |
| 1045 | cg00920069 | cg23539753 | cg23322122 |
| 1046 | cg00920668 | cg23408104 | cg04961225 |
| 1047 | cg00927435 | cg23079522 | cg17985555 |
| 1048 | cg00934066 | cg22108360 | cg19507725 |
| 1049 | cg00935361 | cg21242508 | cg01108243 |
| 1050 | cg00936895 | cg21143086 | cg23682934 |
| 1051 | cg00936935 | cg19755886 | cg17394978 |
| 1052 | cg00937742 | cg18977727 | cg27437304 |
| 1053 | cg00938266 | cg18617669 | cg17475304 |
| 1054 | cg00941576 | cg18338925 | cg09279803 |
| 1055 | cg00941900 | cg17758899 | cg20829550 |
| 1056 | cg00944304 | cg17332023 | cg18998442 |
| 1057 | cg00945443 | cg17099569 | cg13408795 |

|      |            |            |            |
|------|------------|------------|------------|
| 1058 | cg00947413 | cg16617774 | cg16565294 |
| 1059 | cg00948881 | cg16337430 | cg07795346 |
| 1060 | cg00950038 | cg15633699 | cg04384810 |
| 1061 | cg00950412 | cg14691924 | cg24090911 |
| 1062 | cg00951857 | cg14606082 | cg13206932 |
| 1063 | cg00952822 | cg13608684 | cg11879277 |
| 1064 | cg00954841 | cg13576994 | cg16897462 |
| 1065 | cg00961416 | cg13066703 | cg26605683 |
| 1066 | cg00967711 | cg12832565 | cg12494355 |
| 1067 | cg00968638 | cg12219134 | cg04717045 |
| 1068 | cg00969565 | cg12092201 | cg20418769 |
| 1069 | cg00978248 | cg11585301 | cg18352616 |
| 1070 | cg00981003 | cg11251006 | cg05168368 |
| 1071 | cg00981877 | cg10691866 | cg00748072 |
| 1072 | cg00982952 | cg10588276 | cg10558233 |
| 1073 | cg00989505 | cg10152624 | cg19289969 |
| 1074 | cg00990874 | cg09400566 | cg05388880 |
| 1075 | cg00991659 | cg09368832 | cg07260789 |
| 1076 | cg00994389 | cg09258240 | cg16526755 |
| 1077 | cg00998132 | cg09075515 | cg02570643 |
| 1078 | cg00999267 | cg08850243 | cg23233631 |
| 1079 | cg01000937 | cg08450122 | cg18637761 |
| 1080 | cg01004063 | cg08065374 | cg26709300 |
| 1081 | cg01007781 | cg07306006 | cg03035704 |
| 1082 | cg01013023 | cg07241090 | cg04305601 |
| 1083 | cg01014262 | cg06241812 | cg19640166 |
| 1084 | cg01017228 | cg06116260 | cg14978242 |
| 1085 | cg01017395 | cg05116002 | cg06061760 |
| 1086 | cg01017397 | cg04867652 | cg11958644 |
| 1087 | cg01023169 | cg04688645 | cg12865939 |
| 1088 | cg01023808 | cg04034685 | cg07108443 |
| 1089 | cg01032946 | cg03655701 | cg21964551 |
| 1090 | cg01038640 | cg03543120 | cg25487008 |
| 1091 | cg01040499 | cg03538922 | cg11425149 |
| 1092 | cg01044293 | cg03420242 | cg07894983 |
| 1093 | cg01044693 | cg02289020 | cg15888569 |
| 1094 | cg01046905 | cg01992684 | cg01669185 |
| 1095 | cg01048810 | cg01872216 | cg13225881 |
| 1096 | cg01052428 | cg01716084 | cg04462774 |
| 1097 | cg01055121 | cg00647879 | cg12417815 |
| 1098 | cg01060040 | cg27346937 | cg26413192 |
| 1099 | cg01062470 | cg27120246 | cg11996592 |
| 1100 | cg01062651 | cg26797297 | cg22579075 |
| 1101 | cg01063615 | cg26692003 | cg23398508 |
| 1102 | cg01063813 | cg26601559 | cg11976592 |
| 1103 | cg01065180 | cg26152188 | cg10388307 |
| 1104 | cg01066494 | cg25616055 | cg01360115 |
| 1105 | cg01069043 | cg23421128 | cg03529015 |
| 1106 | cg01079658 | cg22427797 | cg20070852 |
| 1107 | cg01084215 | cg20725704 | cg18050634 |
| 1108 | cg01088579 | cg20048529 | cg18556792 |
| 1109 | cg01089364 | cg19827089 | cg22325145 |
| 1110 | cg01094351 | cg18487916 | cg17027476 |

|      |            |            |            |
|------|------------|------------|------------|
| 1111 | cg01096199 | cg16453673 | cg18485877 |
| 1112 | cg01099855 | cg15854022 | cg10989175 |
| 1113 | cg01101448 | cg15702277 | cg14487665 |
| 1114 | cg01103253 | cg14833626 | cg09400566 |
| 1115 | cg01104466 | cg14078730 | cg19638572 |
| 1116 | cg01108243 | cg13461509 | cg13877974 |
| 1117 | cg01110955 | cg13431028 | cg10734581 |
| 1118 | cg01120132 | cg12156838 | cg09331409 |
| 1119 | cg01122461 | cg11843691 | cg10532384 |
| 1120 | cg01138652 | cg09906558 | cg10721220 |
| 1121 | cg01139503 | cg09666417 | cg02572552 |
| 1122 | cg01147665 | cg09567735 | cg02281970 |
| 1123 | cg01150866 | cg09356020 | cg25268422 |
| 1124 | cg01153620 | cg08419373 | cg12108265 |
| 1125 | cg01154505 | cg07872947 | cg23415916 |
| 1126 | cg01156295 | cg07608094 | cg23486701 |
| 1127 | cg01158079 | cg07456413 | cg13871900 |
| 1128 | cg01166827 | cg07067993 | cg06061092 |
| 1129 | cg01170069 | cg06790069 | cg14992217 |
| 1130 | cg01176028 | cg06415302 | cg16738646 |
| 1131 | cg01176141 | cg05539509 | cg25638714 |
| 1132 | cg01176823 | cg04352763 | cg08397968 |
| 1133 | cg01188722 | cg03269976 | cg25341653 |
| 1134 | cg01195672 | cg02855309 | cg23350812 |
| 1135 | cg01197763 | cg02473287 | cg21133992 |
| 1136 | cg01201519 | cg02227879 | cg06918474 |
| 1137 | cg01204060 | cg01788682 | cg22343299 |
| 1138 | cg01214847 | cg27009448 | cg17638841 |
| 1139 | cg01227084 | cg26695387 | cg20197694 |
| 1140 | cg01228193 | cg26618058 | cg00952822 |
| 1141 | cg01246855 | cg26152051 | cg22655196 |
| 1142 | cg01254644 | cg24969303 | cg03407184 |
| 1143 | cg01256365 | cg24893073 | cg03393445 |
| 1144 | cg01259126 | cg24270629 | cg08437802 |
| 1145 | cg01260146 | cg23908771 | cg10095226 |
| 1146 | cg01260820 | cg23711760 | cg18634690 |
| 1147 | cg01262865 | cg23507051 | cg07102397 |
| 1148 | cg01267373 | cg23345038 | cg23318523 |
| 1149 | cg01274028 | cg22946562 | cg16711983 |
| 1150 | cg01274233 | cg22800332 | cg21376658 |
| 1151 | cg01277910 | cg22786667 | cg20080282 |
| 1152 | cg01283625 | cg22700246 | cg08264481 |
| 1153 | cg01288155 | cg22512847 | cg24691835 |
| 1154 | cg01290421 | cg21687003 | cg00945443 |
| 1155 | cg01293277 | cg21457110 | cg13099139 |
| 1156 | cg01294717 | cg21241424 | cg03217729 |
| 1157 | cg01296758 | cg21238061 | cg01827633 |
| 1158 | cg01297744 | cg20941528 | cg08419373 |
| 1159 | cg01298514 | cg20713092 | cg18304186 |
| 1160 | cg01298912 | cg20436707 | cg14377596 |
| 1161 | cg01303055 | cg20323175 | cg14524975 |
| 1162 | cg01303236 | cg19040077 | cg13269555 |
| 1163 | cg01303480 | cg17291826 | cg15587041 |

|      |            |            |            |
|------|------------|------------|------------|
| 1164 | cg01306747 | cg17276624 | cg19514469 |
| 1165 | cg01306824 | cg16283362 | cg19090861 |
| 1166 | cg01314034 | cg15121364 | cg14059665 |
| 1167 | cg01314597 | cg14506192 | cg02522196 |
| 1168 | cg01323212 | cg13973594 | cg11945474 |
| 1169 | cg01324452 | cg13881619 | cg18905668 |
| 1170 | cg01329151 | cg12417362 | cg11562411 |
| 1171 | cg01330448 | cg12108265 | cg23956760 |
| 1172 | cg01333205 | cg11915444 | cg22095128 |
| 1173 | cg01337429 | cg10237442 | cg02449166 |
| 1174 | cg01337736 | cg09956907 | cg24468934 |
| 1175 | cg01338955 | cg09544892 | cg17289222 |
| 1176 | cg01339351 | cg09006420 | cg10024583 |
| 1177 | cg01342572 | cg08351911 | cg03773809 |
| 1178 | cg01343045 | cg08240917 | cg21637392 |
| 1179 | cg01343936 | cg07612468 | cg14769121 |
| 1180 | cg01345395 | cg07192772 | cg23976499 |
| 1181 | cg01349691 | cg06784563 | cg16407998 |
| 1182 | cg01350190 | cg05541267 | cg24969303 |
| 1183 | cg01352276 | cg05139187 | cg13264394 |
| 1184 | cg01356198 | cg04842880 | cg03041650 |
| 1185 | cg01357897 | cg04838832 | cg10639411 |
| 1186 | cg01360115 | cg04113348 | cg07969918 |
| 1187 | cg01362762 | cg03991120 | cg04868238 |
| 1188 | cg01364674 | cg03227104 | cg04964845 |
| 1189 | cg01369033 | cg03212620 | cg08681293 |
| 1190 | cg01370334 | cg02700194 | cg02659431 |
| 1191 | cg01377082 | cg02665727 | cg11964216 |
| 1192 | cg01380884 | cg01753176 | cg16681436 |
| 1193 | cg01388243 | cg01716016 | cg13148544 |
| 1194 | cg01390647 | cg27360231 | cg08154963 |
| 1195 | cg01398428 | cg27241873 | cg03769734 |
| 1196 | cg01400750 | cg26607933 | cg15125438 |
| 1197 | cg01402099 | cg26441486 | cg00637745 |
| 1198 | cg01403055 | cg26411080 | cg12036877 |
| 1199 | cg01403803 | cg26204042 | cg05826596 |
| 1200 | cg01406317 | cg25339408 | cg26543333 |
| 1201 | cg01411786 | cg24479752 | cg15420720 |
| 1202 | cg01413698 | cg23722792 | cg12657361 |
| 1203 | cg01415527 | cg23207527 | cg20663495 |
| 1204 | cg01422009 | cg22501449 | cg05286252 |
| 1205 | cg01422416 | cg22402769 | cg07012484 |
| 1206 | cg01428849 | cg22366375 | cg18252102 |
| 1207 | cg01428928 | cg21532408 | cg13586696 |
| 1208 | cg01432405 | cg21189146 | cg03187301 |
| 1209 | cg01436550 | cg20999795 | cg12183501 |
| 1210 | cg01439112 | cg20773915 | cg05469118 |
| 1211 | cg01442132 | cg20692268 | cg08236537 |
| 1212 | cg01442620 | cg20673255 | cg08088222 |
| 1213 | cg01443467 | cg20000539 | cg21850879 |
| 1214 | cg01449168 | cg19821361 | cg12343881 |
| 1215 | cg01449425 | cg19589800 | cg02804722 |
| 1216 | cg01452115 | cg19109601 | cg02193283 |

|      |            |            |            |
|------|------------|------------|------------|
| 1217 | cg01454538 | cg18917736 | cg15657100 |
| 1218 | cg01456030 | cg18095041 | cg20723705 |
| 1219 | cg01456989 | cg17781669 | cg06509362 |
| 1220 | cg01460382 | cg17578309 | cg24940701 |
| 1221 | cg01467882 | cg17009731 | cg14878988 |
| 1222 | cg01475325 | cg16502866 | cg16133703 |
| 1223 | cg01481251 | cg15963326 | cg08897688 |
| 1224 | cg01482620 | cg14569423 | cg15209369 |
| 1225 | cg01483459 | cg14426682 | cg01579765 |
| 1226 | cg01486610 | cg13924326 | cg15016624 |
| 1227 | cg01486910 | cg13815311 | cg11935248 |
| 1228 | cg01487195 | cg13657511 | cg08104146 |
| 1229 | cg01493020 | cg13215078 | cg09863094 |
| 1230 | cg01494593 | cg12817154 | cg01828733 |
| 1231 | cg01497892 | cg12692727 | cg18818075 |
| 1232 | cg01501018 | cg11835347 | cg19257111 |
| 1233 | cg01503773 | cg11588197 | cg13867915 |
| 1234 | cg01512113 | cg10488777 | cg25864762 |
| 1235 | cg01514831 | cg10095352 | cg27655512 |
| 1236 | cg01518755 | cg09501516 | cg16427420 |
| 1237 | cg01519195 | cg09474229 | cg07125976 |
| 1238 | cg01523759 | cg08576185 | cg08764162 |
| 1239 | cg01527159 | cg06212263 | cg20165037 |
| 1240 | cg01537847 | cg06113801 | cg03784886 |
| 1241 | cg01543307 | cg05651243 | cg04458219 |
| 1242 | cg01545140 | cg05376267 | cg21335012 |
| 1243 | cg01553388 | cg04843968 | cg22986770 |
| 1244 | cg01553584 | cg02644867 | cg14329833 |
| 1245 | cg01553866 | cg02566359 | cg00330518 |
| 1246 | cg01558195 | cg02528008 | cg00760872 |
| 1247 | cg01559031 | cg02393496 | cg18459869 |
| 1248 | cg01559356 | cg02304427 | cg10233454 |
| 1249 | cg01559787 | cg01519195 | cg19961522 |
| 1250 | cg01570589 | cg01361499 | cg17672035 |
| 1251 | cg01576275 | cg01246855 | cg25684961 |
| 1252 | cg01577298 | cg01040499 | cg06254425 |
| 1253 | cg01578585 | cg00663077 | cg04684246 |
| 1254 | cg01578875 | cg00578637 | cg02712546 |
| 1255 | cg01579765 | cg00437969 | cg18657988 |
| 1256 | cg01580176 | cg00358442 | cg25389863 |
| 1257 | cg01581360 | cg00218484 | cg16387467 |
| 1258 | cg01589353 | cg27618145 | cg04774476 |
| 1259 | cg01589629 | cg26710819 | cg20166714 |
| 1260 | cg01592387 | cg26642540 | cg08365638 |
| 1261 | cg01596854 | cg26313421 | cg27618305 |
| 1262 | cg01598009 | cg25517015 | cg21189849 |
| 1263 | cg01604401 | cg25117523 | cg19643097 |
| 1264 | cg01604946 | cg25038926 | cg24403487 |
| 1265 | cg01606770 | cg24260710 | cg09719124 |
| 1266 | cg01618851 | cg24065957 | cg01968525 |
| 1267 | cg01628053 | cg22737001 | cg02243479 |
| 1268 | cg01634146 | cg22525688 | cg17473727 |
| 1269 | cg01637244 | cg22459081 | cg17587997 |



|      |            |            |            |
|------|------------|------------|------------|
| 1270 | cg01645401 | cg22040672 | cg26929394 |
| 1271 | cg01653532 | cg22021794 | cg08523978 |
| 1272 | cg01655150 | cg21222559 | cg22451265 |
| 1273 | cg01656717 | cg21159068 | cg24004007 |
| 1274 | cg01663970 | cg20156139 | cg18869485 |
| 1275 | cg01664382 | cg19970953 | cg03044471 |
| 1276 | cg01667978 | cg19668990 | cg06400255 |
| 1277 | cg01669185 | cg19441674 | cg02688118 |
| 1278 | cg01676623 | cg19358589 | cg22123915 |
| 1279 | cg01691710 | cg18566883 | cg07085590 |
| 1280 | cg01693662 | cg17766055 | cg15816464 |
| 1281 | cg01705036 | cg16778107 | cg17820025 |
| 1282 | cg01715499 | cg16745596 | cg02196592 |
| 1283 | cg01716016 | cg16572410 | cg15022671 |
| 1284 | cg01716827 | cg16290996 | cg05307141 |
| 1285 | cg01719663 | cg15944060 | cg09925747 |
| 1286 | cg01722498 | cg15475080 | cg09040552 |
| 1287 | cg01723163 | cg15420720 | cg02317397 |
| 1288 | cg01727408 | cg14947411 | cg17702736 |
| 1289 | cg01730064 | cg14783283 | cg19317226 |
| 1290 | cg01733438 | cg14210790 | cg15991082 |
| 1291 | cg01741616 | cg14035238 | cg27039312 |
| 1292 | cg01749725 | cg13477354 | cg10809958 |
| 1293 | cg01753176 | cg13447933 | cg22427797 |
| 1294 | cg01753263 | cg11850468 | cg23920016 |
| 1295 | cg01758022 | cg11786870 | cg12266049 |
| 1296 | cg01759870 | cg11637968 | cg18034859 |
| 1297 | cg01761758 | cg11576424 | cg21439672 |
| 1298 | cg01767116 | cg10677144 | cg09074223 |
| 1299 | cg01770296 | cg10512951 | cg22430861 |
| 1300 | cg01778908 | cg10507281 | cg19235974 |
| 1301 | cg01778994 | cg10215501 | cg20780180 |
| 1302 | cg01789743 | cg09912552 | cg10016358 |
| 1303 | cg01791238 | cg08954601 | cg08947774 |
| 1304 | cg01792640 | cg08934799 | cg27454102 |
| 1305 | cg01793617 | cg07965566 | cg26828839 |
| 1306 | cg01794853 | cg07716847 | cg05060686 |
| 1307 | cg01794926 | cg07295918 | cg04654299 |
| 1308 | cg01804278 | cg07206497 | cg13877631 |
| 1309 | cg01809895 | cg06890747 | cg25568490 |
| 1310 | cg01810186 | cg06445533 | cg10681992 |
| 1311 | cg01810347 | cg05261433 | cg22171607 |
| 1312 | cg01810684 | cg05162523 | cg21879102 |
| 1313 | cg01818102 | cg05051393 | cg14741474 |
| 1314 | cg01818539 | cg04993279 | cg00873009 |
| 1315 | cg01820765 | cg04550439 | cg03430597 |
| 1316 | cg01824284 | cg04249605 | cg13278004 |
| 1317 | cg01824933 | cg03727333 | cg02061820 |
| 1318 | cg01825806 | cg03511735 | cg05299486 |
| 1319 | cg01838863 | cg03344672 | cg24429037 |
| 1320 | cg01848660 | cg03278299 | cg20336472 |
| 1321 | cg01849845 | cg02979010 | cg01514831 |
| 1322 | cg01851970 | cg02426072 | cg04819655 |

|      |            |            |            |
|------|------------|------------|------------|
| 1323 | cg01852611 | cg02278728 | cg02512395 |
| 1324 | cg01859228 | cg02115911 | cg25909064 |
| 1325 | cg01859460 | cg01559031 | cg02607972 |
| 1326 | cg01863398 | cg00552168 | cg00578637 |
| 1327 | cg01866330 | cg00050289 | cg13107973 |
| 1328 | cg01866959 | cg27635271 | cg05771342 |
| 1329 | cg01869896 | cg26915618 | cg12555086 |
| 1330 | cg01870865 | cg26899399 | cg21460582 |
| 1331 | cg01870976 | cg26668713 | cg23539494 |
| 1332 | cg01871631 | cg26066560 | cg05976168 |
| 1333 | cg01876978 | cg25993608 | cg15317049 |
| 1334 | cg01881549 | cg25920512 | cg19770671 |
| 1335 | cg01885814 | cg25389863 | cg03141944 |
| 1336 | cg01887374 | cg25341653 | cg05817833 |
| 1337 | cg01902704 | cg25264265 | cg25117523 |
| 1338 | cg01903305 | cg24873093 | cg07283859 |
| 1339 | cg01914059 | cg24212377 | cg11822372 |
| 1340 | cg01922697 | cg23656110 | cg17340779 |
| 1341 | cg01924223 | cg23630423 | cg14467840 |
| 1342 | cg01930756 | cg23378722 | cg20692268 |
| 1343 | cg01930924 | cg23366234 | cg10427430 |
| 1344 | cg01932663 | cg23252698 | cg01274028 |
| 1345 | cg01937669 | cg22430861 | cg25197500 |
| 1346 | cg01938025 | cg21386766 | cg03437713 |
| 1347 | cg01942927 | cg20780180 | cg21643731 |
| 1348 | cg01943414 | cg20664445 | cg10327980 |
| 1349 | cg01945624 | cg20218614 | cg06702537 |
| 1350 | cg01946510 | cg19918057 | cg11909137 |
| 1351 | cg01949455 | cg19289969 | cg07866001 |
| 1352 | cg01954438 | cg18697143 | cg01902704 |
| 1353 | cg01957900 | cg17724175 | cg11919577 |
| 1354 | cg01959071 | cg17586345 | cg26224624 |
| 1355 | cg01959238 | cg16826504 | cg04133502 |
| 1356 | cg01959262 | cg16422492 | cg22584802 |
| 1357 | cg01968002 | cg16234490 | cg06422947 |
| 1358 | cg01968525 | cg16026813 | cg19270309 |
| 1359 | cg01971085 | cg15911948 | cg13626676 |
| 1360 | cg01989275 | cg14692453 | cg01838863 |
| 1361 | cg01991625 | cg14244360 | cg16446824 |
| 1362 | cg01992684 | cg14207326 | cg23475725 |
| 1363 | cg01997461 | cg14095720 | cg02873783 |
| 1364 | cg02003272 | cg13948956 | cg19480117 |
| 1365 | cg02003612 | cg13784276 | cg16889721 |
| 1366 | cg02008511 | cg13662628 | cg04751761 |
| 1367 | cg02010047 | cg13537008 | cg11828741 |
| 1368 | cg02011409 | cg12117658 | cg17173086 |
| 1369 | cg02013018 | cg11909989 | cg02250553 |
| 1370 | cg02015219 | cg11043092 | cg02550308 |
| 1371 | cg02017718 | cg10626305 | cg26026296 |
| 1372 | cg02021485 | cg10604241 | cg25865108 |
| 1373 | cg02025435 | cg10472320 | cg08576185 |
| 1374 | cg02034328 | cg09913449 | cg11850468 |
| 1375 | cg02040734 | cg09727436 | cg19623406 |

|      |            |            |            |
|------|------------|------------|------------|
| 1376 | cg02043994 | cg09643151 | cg00166343 |
| 1377 | cg02048412 | cg09307742 | cg02469356 |
| 1378 | cg02053092 | cg09276451 | cg23280294 |
| 1379 | cg02055483 | cg08929612 | cg20677267 |
| 1380 | cg02058267 | cg08719095 | cg20721135 |
| 1381 | cg02060039 | cg07835154 | cg26495716 |
| 1382 | cg02060434 | cg07103201 | cg13471336 |
| 1383 | cg02061820 | cg06787609 | cg02386311 |
| 1384 | cg02061967 | cg06183287 | cg21818807 |
| 1385 | cg02062816 | cg05898188 | cg20309371 |
| 1386 | cg02065141 | cg05798436 | cg13420004 |
| 1387 | cg02066343 | cg04397884 | cg21251203 |
| 1388 | cg02066441 | cg04349839 | cg10036892 |
| 1389 | cg02067239 | cg04198125 | cg12692386 |
| 1390 | cg02069095 | cg04002957 | cg13661703 |
| 1391 | cg02069944 | cg03168587 | cg04716580 |
| 1392 | cg02078525 | cg03078718 | cg18700940 |
| 1393 | cg02083559 | cg02998075 | cg02528008 |
| 1394 | cg02083676 | cg02816367 | cg07116732 |
| 1395 | cg02084214 | cg02648064 | cg00954841 |
| 1396 | cg02084834 | cg02055483 | cg09921821 |
| 1397 | cg02084948 | cg01576275 | cg01101448 |
| 1398 | cg02087101 | cg01228193 | cg24437859 |
| 1399 | cg02102075 | cg00990874 | cg22413209 |
| 1400 | cg02107173 | cg00876376 | cg01462184 |
| 1401 | cg02108015 | cg00512280 | cg04431002 |
| 1402 | cg02110527 | cg00158770 | cg01048810 |
| 1403 | cg02112621 | cg27573308 | cg07103201 |
| 1404 | cg02113385 | cg27143326 | cg16175077 |
| 1405 | cg02113604 | cg26656452 | cg12232388 |
| 1406 | cg02116283 | cg26650973 | cg02723533 |
| 1407 | cg02119693 | cg26166004 | cg14041194 |
| 1408 | cg02122052 | cg25552705 | cg24870662 |
| 1409 | cg02124957 | cg23304923 | cg26311262 |
| 1410 | cg02131465 | cg23143093 | cg13283765 |
| 1411 | cg02133557 | cg22971402 | cg25369553 |
| 1412 | cg02137970 | cg22890896 | cg02737507 |
| 1413 | cg02138124 | cg22605643 | cg00941900 |
| 1414 | cg02144518 | cg22448292 | cg17297775 |
| 1415 | cg02144874 | cg21757281 | cg19582744 |
| 1416 | cg02146941 | cg21756355 | cg06853492 |
| 1417 | cg02147208 | cg21475076 | cg11438039 |
| 1418 | cg02148034 | cg20916646 | cg00686915 |
| 1419 | cg02150714 | cg20899781 | cg16452866 |
| 1420 | cg02153814 | cg20739726 | cg24335984 |
| 1421 | cg02153855 | cg20462191 | cg00442802 |
| 1422 | cg02156952 | cg20100049 | cg12526923 |
| 1423 | cg02157002 | cg19992808 | cg01818102 |
| 1424 | cg02157052 | cg19863040 | cg16976520 |
| 1425 | cg02157454 | cg19793499 | cg10950593 |
| 1426 | cg02159643 | cg18998365 | cg08616182 |
| 1427 | cg02162605 | cg18772205 | cg15507500 |
| 1428 | cg02165692 | cg18751958 | cg24852135 |

|      |            |            |            |
|------|------------|------------|------------|
| 1429 | cg02172773 | cg18738548 | cg01983725 |
| 1430 | cg02175033 | cg18710162 | cg04100595 |
| 1431 | cg02190127 | cg18634690 | cg18729298 |
| 1432 | cg02191483 | cg18560571 | cg05824594 |
| 1433 | cg02192555 | cg17634490 | cg13560612 |
| 1434 | cg02193283 | cg17344813 | cg09580592 |
| 1435 | cg02193967 | cg17115147 | cg24288527 |
| 1436 | cg02196592 | cg17112695 | cg06241812 |
| 1437 | cg02197542 | cg16306083 | cg20516209 |
| 1438 | cg02202664 | cg16277214 | cg05585379 |
| 1439 | cg02212339 | cg16239826 | cg05888037 |
| 1440 | cg02214441 | cg16073408 | cg10480329 |
| 1441 | cg02216206 | cg15941159 | cg19006220 |
| 1442 | cg02217035 | cg15262242 | cg06492744 |
| 1443 | cg02225004 | cg15249446 | cg15556723 |
| 1444 | cg02226672 | cg14852276 | cg00089486 |
| 1445 | cg02227879 | cg14694342 | cg27399387 |
| 1446 | cg02228688 | cg14461852 | cg01428849 |
| 1447 | cg02235663 | cg14437446 | cg04438661 |
| 1448 | cg02237875 | cg14117392 | cg10488777 |
| 1449 | cg02238387 | cg13079633 | cg25317315 |
| 1450 | cg02240030 | cg12796332 | cg11190278 |
| 1451 | cg02240936 | cg11009590 | cg26092233 |
| 1452 | cg02243479 | cg10877385 | cg22152438 |
| 1453 | cg02244933 | cg10740573 | cg02882004 |
| 1454 | cg02246916 | cg10457066 | cg06208158 |
| 1455 | cg02247300 | cg10063637 | cg13556624 |
| 1456 | cg02249969 | cg09647797 | cg26449178 |
| 1457 | cg02250553 | cg09631059 | cg14651518 |
| 1458 | cg02255721 | cg09602138 | cg20482280 |
| 1459 | cg02262037 | cg09100695 | cg06719042 |
| 1460 | cg02264288 | cg08215532 | cg26889953 |
| 1461 | cg02272457 | cg07986222 | cg07425568 |
| 1462 | cg02272751 | cg07691914 | cg14101687 |
| 1463 | cg02273647 | cg07665060 | cg01096199 |
| 1464 | cg02274236 | cg07561547 | cg08351911 |
| 1465 | cg02278728 | cg07236812 | cg27273675 |
| 1466 | cg02281970 | cg06933824 | cg11724511 |
| 1467 | cg02283353 | cg06765552 | cg16564135 |
| 1468 | cg02287325 | cg05867158 | cg09526469 |
| 1469 | cg02297063 | cg05854826 | cg05054460 |
| 1470 | cg02304222 | cg05595142 | cg06824199 |
| 1471 | cg02304427 | cg05483875 | cg01422009 |
| 1472 | cg02304580 | cg05426006 | cg19025193 |
| 1473 | cg02306481 | cg05002642 | cg16222367 |
| 1474 | cg02315513 | cg04948014 | cg08378932 |
| 1475 | cg02317251 | cg04944536 | cg02574861 |
| 1476 | cg02317397 | cg03784886 | cg20428133 |
| 1477 | cg02323633 | cg03701759 | cg17384769 |
| 1478 | cg02327654 | cg03639170 | cg05091570 |
| 1479 | cg02331025 | cg03573445 | cg19725377 |
| 1480 | cg02332902 | cg03291336 | cg13930682 |
| 1481 | cg02338778 | cg03217729 | cg05515072 |

|      |            |            |            |
|------|------------|------------|------------|
| 1482 | cg02339793 | cg02966841 | cg11632592 |
| 1483 | cg02340818 | cg02928110 | cg13475704 |
| 1484 | cg02344497 | cg02567151 | cg21035368 |
| 1485 | cg02348449 | cg02374486 | cg17094249 |
| 1486 | cg02353448 | cg01870865 | cg02113385 |
| 1487 | cg02358804 | cg01545140 | cg04454664 |
| 1488 | cg02362505 | cg01099855 | cg23732483 |
| 1489 | cg02363010 | cg01089364 | cg19018155 |
| 1490 | cg02363969 | cg00944304 | cg21158528 |
| 1491 | cg02364518 | cg00818557 | cg16927379 |
| 1492 | cg02364610 | cg00623312 | cg25852019 |
| 1493 | cg02366931 | cg00334274 | cg19016264 |
| 1494 | cg02367992 | cg27059537 | cg15396800 |
| 1495 | cg02369775 | cg26552621 | cg10364862 |
| 1496 | cg02372856 | cg25971741 | cg15074047 |
| 1497 | cg02374486 | cg25878830 | cg08864083 |
| 1498 | cg02384859 | cg25590335 | cg19921577 |
| 1499 | cg02386311 | cg25373624 | cg04046364 |
| 1500 | cg02393496 | cg25301103 | cg09657114 |
| 1501 | cg02399019 | cg25048985 | cg08869160 |
| 1502 | cg02399294 | cg24925163 | cg27110374 |
| 1503 | cg02402630 | cg24859433 | cg13821008 |
| 1504 | cg02418175 | cg24083817 | cg05482973 |
| 1505 | cg02421824 | cg23903708 | cg05051393 |
| 1506 | cg02426072 | cg23493119 | cg05386977 |
| 1507 | cg02435083 | cg22240998 | cg00777079 |
| 1508 | cg02436098 | cg22197033 | cg04307274 |
| 1509 | cg02438575 | cg21854332 | cg12866104 |
| 1510 | cg02447268 | cg21670987 | cg07826642 |
| 1511 | cg02447556 | cg21460686 | cg22488259 |
| 1512 | cg02449166 | cg21032292 | cg06518233 |
| 1513 | cg02451516 | cg20210637 | cg26448609 |
| 1514 | cg02454890 | cg20027331 | cg20700977 |
| 1515 | cg02455836 | cg19513744 | cg27212729 |
| 1516 | cg02461114 | cg19259111 | cg12686055 |
| 1517 | cg02462416 | cg18938534 | cg02722657 |
| 1518 | cg02463970 | cg18817654 | cg22119466 |
| 1519 | cg02468821 | cg17327331 | cg10677144 |
| 1520 | cg02469356 | cg17196448 | cg25794830 |
| 1521 | cg02469916 | cg17013513 | cg19354017 |
| 1522 | cg02473287 | cg16927379 | cg15894581 |
| 1523 | cg02480405 | cg16636756 | cg10488292 |
| 1524 | cg02481307 | cg16616370 | cg14701108 |
| 1525 | cg02481714 | cg16366639 | cg18148375 |
| 1526 | cg02486181 | cg16293569 | cg08369014 |
| 1527 | cg02492708 | cg15336269 | cg08833741 |
| 1528 | cg02493905 | cg15089806 | cg03608520 |
| 1529 | cg02495250 | cg14835545 | cg11966063 |
| 1530 | cg02495395 | cg14701108 | cg09075515 |
| 1531 | cg02495413 | cg14558880 | cg14210790 |
| 1532 | cg02509027 | cg14144513 | cg01794853 |
| 1533 | cg02512395 | cg13716849 | cg06755413 |
| 1534 | cg02517473 | cg13263472 | cg26932693 |

|      |            |            |            |
|------|------------|------------|------------|
| 1535 | cg02524863 | cg13036546 | cg18250135 |
| 1536 | cg02538557 | cg12817352 | cg23019125 |
| 1537 | cg02550308 | cg12786452 | cg20210151 |
| 1538 | cg02552250 | cg12485685 | cg01604401 |
| 1539 | cg02556345 | cg12163952 | cg00359365 |
| 1540 | cg02560388 | cg12079279 | cg26638069 |
| 1541 | cg02563156 | cg12076543 | cg06172939 |
| 1542 | cg02566359 | cg11979837 | cg14788686 |
| 1543 | cg02567151 | cg11698119 | cg00592695 |
| 1544 | cg02569718 | cg11628781 | cg20169015 |
| 1545 | cg02570361 | cg11583751 | cg08293075 |
| 1546 | cg02570643 | cg11344729 | cg21719704 |
| 1547 | cg02572552 | cg11018723 | cg00232535 |
| 1548 | cg02574861 | cg10931901 | cg08039592 |
| 1549 | cg02581587 | cg10515332 | cg03667405 |
| 1550 | cg02582619 | cg10214757 | cg22989033 |
| 1551 | cg02583282 | cg09863094 | cg25588389 |
| 1552 | cg02588098 | cg09835239 | cg03654273 |
| 1553 | cg02592525 | cg09807875 | cg16521032 |
| 1554 | cg02596645 | cg09695261 | cg01452115 |
| 1555 | cg02597698 | cg09159050 | cg12944530 |
| 1556 | cg02598618 | cg08964948 | cg07835154 |
| 1557 | cg02604890 | cg08737189 | cg22442617 |
| 1558 | cg02604995 | cg08463775 | cg07549381 |
| 1559 | cg02605292 | cg08185095 | cg10278297 |
| 1560 | cg02607544 | cg07132183 | cg27494100 |
| 1561 | cg02607972 | cg07012484 | cg06749819 |
| 1562 | cg02613295 | cg06853455 | cg01824603 |
| 1563 | cg02613380 | cg06272543 | cg03576555 |
| 1564 | cg02619478 | cg06126019 | cg17171539 |
| 1565 | cg02621481 | cg05966641 | cg06272543 |
| 1566 | cg02625138 | cg05750926 | cg21214613 |
| 1567 | cg02627286 | cg05634149 | cg01298514 |
| 1568 | cg02628107 | cg05258102 | cg25587431 |
| 1569 | cg02628360 | cg05004818 | cg23309670 |
| 1570 | cg02631921 | cg04890137 | cg05145297 |
| 1571 | cg02633363 | cg04458219 | cg26645242 |
| 1572 | cg02633409 | cg04384031 | cg14684068 |
| 1573 | cg02635482 | cg04381888 | cg24212377 |
| 1574 | cg02638755 | cg04210082 | cg19266014 |
| 1575 | cg02643834 | cg03631837 | cg07478501 |
| 1576 | cg02644867 | cg03526625 | cg03583746 |
| 1577 | cg02645302 | cg03316628 | cg07904865 |
| 1578 | cg02648064 | cg03138206 | cg16452651 |
| 1579 | cg02648939 | cg03074188 | cg07109453 |
| 1580 | cg02650017 | cg03042971 | cg20447038 |
| 1581 | cg02654449 | cg02667335 | cg24896649 |
| 1582 | cg02656049 | cg02153855 | cg01099855 |
| 1583 | cg02659431 | cg02102075 | cg18537410 |
| 1584 | cg02660541 | cg01876978 | cg07409629 |
| 1585 | cg02665399 | cg01640684 | cg06791695 |
| 1586 | cg02665727 | cg00656264 | cg02931058 |
| 1587 | cg02667335 | cg00007036 | cg25688583 |

|      |            |            |            |
|------|------------|------------|------------|
| 1588 | cg02667880 | cg27627006 | cg14035238 |
| 1589 | cg02685896 | cg27280313 | cg19410796 |
| 1590 | cg02688118 | cg27222884 | cg21177165 |
| 1591 | cg02693127 | cg27117828 | cg16318412 |
| 1592 | cg02695969 | cg26449178 | cg15335728 |
| 1593 | cg02697979 | cg26423542 | cg21364077 |
| 1594 | cg02700194 | cg26325286 | cg25567938 |
| 1595 | cg02704331 | cg26034341 | cg07048516 |
| 1596 | cg02704946 | cg25731074 | cg27067922 |
| 1597 | cg02707799 | cg25479682 | cg17213154 |
| 1598 | cg02710481 | cg25013910 | cg03615933 |
| 1599 | cg02712546 | cg24875593 | cg15408497 |
| 1600 | cg02714192 | cg24830876 | cg27375286 |
| 1601 | cg02718078 | cg24257168 | cg24463664 |
| 1602 | cg02723533 | cg22913843 | cg12491114 |
| 1603 | cg02725620 | cg22834511 | cg13981325 |
| 1604 | cg02727423 | cg22685009 | cg06342954 |
| 1605 | cg02729303 | cg22418565 | cg22982093 |
| 1606 | cg02730804 | cg22342925 | cg17903316 |
| 1607 | cg02733842 | cg21973907 | cg02365900 |
| 1608 | cg02734600 | cg21936959 | cg27117828 |
| 1609 | cg02737507 | cg21893764 | cg10514113 |
| 1610 | cg02742533 | cg21855211 | cg08426200 |
| 1611 | cg02743136 | cg21727276 | cg16668903 |
| 1612 | cg02753511 | cg21528710 | cg22622505 |
| 1613 | cg02753990 | cg21108851 | cg05700348 |
| 1614 | cg02762546 | cg20185083 | cg12987059 |
| 1615 | cg02764093 | cg20154222 | cg13414654 |
| 1616 | cg02767093 | cg19747744 | cg23021584 |
| 1617 | cg02776768 | cg19271753 | cg01937669 |
| 1618 | cg02780210 | cg18553570 | cg04508114 |
| 1619 | cg02785745 | cg17670999 | cg24073994 |
| 1620 | cg02785870 | cg17569754 | cg13708908 |
| 1621 | cg02793948 | cg17256760 | cg13477354 |
| 1622 | cg02800817 | cg16752592 | cg18794809 |
| 1623 | cg02804722 | cg16510440 | cg10273135 |
| 1624 | cg02806032 | cg15970457 | cg09196257 |
| 1625 | cg02806704 | cg15661715 | cg11952493 |
| 1626 | cg02807008 | cg15191744 | cg21223341 |
| 1627 | cg02816367 | cg15188939 | cg19233001 |
| 1628 | cg02816525 | cg15076811 | cg10904740 |
| 1629 | cg02817932 | cg15033036 | cg24766229 |
| 1630 | cg02818775 | cg14482093 | cg13276704 |
| 1631 | cg02821693 | cg14467415 | cg22730007 |
| 1632 | cg02823137 | cg14260162 | cg26894079 |
| 1633 | cg02825527 | cg14189391 | cg21779805 |
| 1634 | cg02827132 | cg13994897 | cg03139388 |
| 1635 | cg02829456 | cg13821008 | cg19107511 |
| 1636 | cg02832357 | cg13565718 | cg06678137 |
| 1637 | cg02832905 | cg13525067 | cg00585818 |
| 1638 | cg02835462 | cg13153796 | cg25412310 |
| 1639 | cg02836864 | cg12948116 | cg13171643 |
| 1640 | cg02844593 | cg12938917 | cg15082028 |

|      |            |            |            |
|------|------------|------------|------------|
| 1641 | cg02855309 | cg12865675 | cg27196496 |
| 1642 | cg02855558 | cg12416830 | cg02084948 |
| 1643 | cg02857760 | cg12267069 | cg20505457 |
| 1644 | cg02862467 | cg12265604 | cg07471052 |
| 1645 | cg02867857 | cg11589139 | cg14082061 |
| 1646 | cg02869364 | cg10982692 | cg12667792 |
| 1647 | cg02872491 | cg10583144 | cg09326362 |
| 1648 | cg02873783 | cg09890597 | cg03837909 |
| 1649 | cg02875487 | cg09548893 | cg19325477 |
| 1650 | cg02878891 | cg08573299 | cg16908123 |
| 1651 | cg02886591 | cg08527124 | cg21759907 |
| 1652 | cg02898721 | cg08418375 | cg06537652 |
| 1653 | cg02901002 | cg08351131 | cg05651243 |
| 1654 | cg02901644 | cg08317243 | cg01343045 |
| 1655 | cg02907662 | cg08205361 | cg13948956 |
| 1656 | cg02910959 | cg07894983 | cg16092370 |
| 1657 | cg02914790 | cg07691004 | cg00869941 |
| 1658 | cg02920396 | cg07433905 | cg21544633 |
| 1659 | cg02926160 | cg06784602 | cg24550880 |
| 1660 | cg02926266 | cg06387842 | cg02452418 |
| 1661 | cg02926747 | cg06208270 | cg12271433 |
| 1662 | cg02930033 | cg06056558 | cg01932663 |
| 1663 | cg02931058 | cg05615477 | cg26953293 |
| 1664 | cg02935024 | cg05529123 | cg02597698 |
| 1665 | cg02937548 | cg05384450 | cg02961707 |
| 1666 | cg02938429 | cg04213390 | cg04234758 |
| 1667 | cg02940164 | cg04196068 | cg20634514 |
| 1668 | cg02940562 | cg03573679 | cg19950556 |
| 1669 | cg02951526 | cg03485217 | cg14021880 |
| 1670 | cg02958180 | cg03431067 | cg10062065 |
| 1671 | cg02958947 | cg03358345 | cg03562531 |
| 1672 | cg02959112 | cg03333149 | cg10354880 |
| 1673 | cg02961707 | cg03318904 | cg17692230 |
| 1674 | cg02966841 | cg02102684 | cg19287817 |
| 1675 | cg02968890 | cg01938025 | cg17266282 |
| 1676 | cg02970384 | cg01716827 | cg06551007 |
| 1677 | cg02972941 | cg00901982 | cg07565042 |
| 1678 | cg02973735 | cg00750074 | cg15269394 |
| 1679 | cg02975060 | cg00669856 | cg08095452 |
| 1680 | cg02976723 | cg00489394 | cg13431028 |
| 1681 | cg02979010 | cg00355286 | cg09226986 |
| 1682 | cg02983650 | cg00123317 | cg01329151 |
| 1683 | cg02993070 | cg27663249 | cg15540341 |
| 1684 | cg02998075 | cg27655716 | cg24553775 |
| 1685 | cg02998240 | cg27410136 | cg04349839 |
| 1686 | cg02999082 | cg27301230 | cg03803102 |
| 1687 | cg03006477 | cg26872742 | cg09483967 |
| 1688 | cg03010561 | cg26572651 | cg00118783 |
| 1689 | cg03013188 | cg26503877 | cg03198029 |
| 1690 | cg03013917 | cg25995420 | cg08351131 |
| 1691 | cg03017264 | cg25964040 | cg26888672 |
| 1692 | cg03023681 | cg25556464 | cg20515846 |
| 1693 | cg03029255 | cg25424742 | cg23476802 |



|      |            |            |            |
|------|------------|------------|------------|
| 1694 | cg03031073 | cg25061701 | cg04397884 |
| 1695 | cg03031182 | cg24614218 | cg06096901 |
| 1696 | cg03031526 | cg24075760 | cg10021749 |
| 1697 | cg03035359 | cg23085846 | cg15346286 |
| 1698 | cg03035704 | cg23049226 | cg14914440 |
| 1699 | cg03036214 | cg22937762 | cg08915024 |
| 1700 | cg03036398 | cg22921096 | cg05584950 |
| 1701 | cg03038245 | cg22118416 | cg03227104 |
| 1702 | cg03040489 | cg21546522 | cg05101437 |
| 1703 | cg03042971 | cg21513803 | cg08384155 |
| 1704 | cg03047420 | cg21270847 | cg24469719 |
| 1705 | cg03049691 | cg21000919 | cg12785228 |
| 1706 | cg03049782 | cg20937296 | cg06263395 |
| 1707 | cg03050096 | cg20822767 | cg00001687 |
| 1708 | cg03050965 | cg20792436 | cg16786144 |
| 1709 | cg03051577 | cg20761844 | cg12832565 |
| 1710 | cg03052760 | cg20141509 | cg02695969 |
| 1711 | cg03054026 | cg20019410 | cg11567885 |
| 1712 | cg03058664 | cg19756253 | cg10472320 |
| 1713 | cg03063946 | cg19709083 | cg02436098 |
| 1714 | cg03072692 | cg19025193 | cg06892907 |
| 1715 | cg03074188 | cg18766468 | cg07267984 |
| 1716 | cg03077492 | cg18537410 | cg20300776 |
| 1717 | cg03077671 | cg17589079 | cg07733851 |
| 1718 | cg03078718 | cg17173086 | cg01343936 |
| 1719 | cg03082830 | cg16953473 | cg02366931 |
| 1720 | cg03089923 | cg16263152 | cg26847438 |
| 1721 | cg03091010 | cg16106427 | cg12728606 |
| 1722 | cg03095814 | cg16075266 | cg18465694 |
| 1723 | cg03098159 | cg15853299 | cg08644340 |
| 1724 | cg03098837 | cg15373257 | cg01303480 |
| 1725 | cg03101580 | cg15329179 | cg24259291 |
| 1726 | cg03110167 | cg15162922 | cg26804423 |
| 1727 | cg03114711 | cg15012161 | cg01881549 |
| 1728 | cg03119088 | cg14937059 | cg00062282 |
| 1729 | cg03119829 | cg14058027 | cg05621583 |
| 1730 | cg03125400 | cg13701991 | cg18697143 |
| 1731 | cg03125765 | cg13654085 | cg25189085 |
| 1732 | cg03129134 | cg13514824 | cg24495350 |
| 1733 | cg03137908 | cg13491731 | cg13943333 |
| 1734 | cg03138206 | cg13089661 | cg23036171 |
| 1735 | cg03139388 | cg12774921 | cg24804060 |
| 1736 | cg03140766 | cg12599569 | cg07127410 |
| 1737 | cg03142002 | cg12503110 | cg06294954 |
| 1738 | cg03143333 | cg12486287 | cg07541559 |
| 1739 | cg03143347 | cg11728201 | cg05185926 |
| 1740 | cg03148858 | cg11654662 | cg01063813 |
| 1741 | cg03158194 | cg11492886 | cg16890796 |
| 1742 | cg03161498 | cg11482422 | cg02517473 |
| 1743 | cg03162779 | cg11439877 | cg22422264 |
| 1744 | cg03163783 | cg11263420 | cg18539461 |
| 1745 | cg03168587 | cg11253592 | cg19295314 |
| 1746 | cg03177023 | cg10532384 | cg09086087 |

|      |            |            |            |
|------|------------|------------|------------|
| 1747 | cg03178838 | cg10338364 | cg23258611 |
| 1748 | cg03181382 | cg10021122 | cg19791606 |
| 1749 | cg03181618 | cg10018519 | cg21422871 |
| 1750 | cg03182608 | cg08970648 | cg25666403 |
| 1751 | cg03187301 | cg08159271 | cg04324821 |
| 1752 | cg03197830 | cg08143701 | cg16309127 |
| 1753 | cg03198029 | cg07048592 | cg26692003 |
| 1754 | cg03199926 | cg06919693 | cg00415011 |
| 1755 | cg03215152 | cg06898502 | cg18998365 |
| 1756 | cg03215657 | cg06194960 | cg07818422 |
| 1757 | cg03216474 | cg05833851 | cg06553058 |
| 1758 | cg03216729 | cg05823589 | cg13089599 |
| 1759 | cg03217729 | cg04813695 | cg15626112 |
| 1760 | cg03227104 | cg04767697 | cg04402828 |
| 1761 | cg03229767 | cg04287574 | cg06132803 |
| 1762 | cg03234557 | cg04216070 | cg09607915 |
| 1763 | cg03242880 | cg04091961 | cg16174644 |
| 1764 | cg03244438 | cg04026354 | cg00054496 |
| 1765 | cg03244796 | cg03977174 | cg20008846 |
| 1766 | cg03252568 | cg03738365 | cg19831403 |
| 1767 | cg03253309 | cg03582793 | cg18595065 |
| 1768 | cg03260744 | cg03562531 | cg14326472 |
| 1769 | cg03267954 | cg03355204 | cg13298379 |
| 1770 | cg03269976 | cg03101492 | cg25498969 |
| 1771 | cg03270929 | cg03036398 | cg18272538 |
| 1772 | cg03278299 | cg02704331 | cg26960083 |
| 1773 | cg03284113 | cg02695969 | cg02764093 |
| 1774 | cg03285823 | cg02574861 | cg02133557 |
| 1775 | cg03286742 | cg02481307 | cg11758841 |
| 1776 | cg03286774 | cg02317397 | cg11344729 |
| 1777 | cg03287929 | cg02146941 | cg02068351 |
| 1778 | cg03289072 | cg02113604 | cg12914733 |
| 1779 | cg03294704 | cg01809895 | cg08094614 |
| 1780 | cg03296204 | cg01794926 | cg07284476 |
| 1781 | cg03300805 | cg01678309 | cg03956820 |
| 1782 | cg03301025 | cg01004063 | cg00870269 |
| 1783 | cg03307425 | cg00353407 | cg01922697 |
| 1784 | cg03315432 | cg00335361 | cg24197051 |
| 1785 | cg03316628 | cg27493345 | cg08955461 |
| 1786 | cg03318904 | cg27483571 | cg10667102 |
| 1787 | cg03318937 | cg27449255 | cg23916878 |
| 1788 | cg03326128 | cg27092594 | cg14467415 |
| 1789 | cg03326699 | cg26685539 | cg01602730 |
| 1790 | cg03330678 | cg26502610 | cg23058194 |
| 1791 | cg03333116 | cg26466921 | cg22846809 |
| 1792 | cg03333149 | cg26215113 | cg07581623 |
| 1793 | cg03339668 | cg25589001 | cg25364972 |
| 1794 | cg03339817 | cg25504217 | cg04025970 |
| 1795 | cg03344672 | cg25346117 | cg05141289 |
| 1796 | cg03345925 | cg24831140 | cg02707799 |
| 1797 | cg03358345 | cg24387101 | cg08805497 |
| 1798 | cg03359508 | cg24104241 | cg04285855 |
| 1799 | cg03367519 | cg24018760 | cg00656264 |

|      |            |            |            |
|------|------------|------------|------------|
| 1800 | cg03370270 | cg23929809 | cg07306006 |
| 1801 | cg03379681 | cg23244877 | cg21286967 |
| 1802 | cg03380645 | cg23235334 | cg14939765 |
| 1803 | cg03380744 | cg23039189 | cg12351906 |
| 1804 | cg03381007 | cg22396663 | cg10055950 |
| 1805 | cg03384915 | cg22289815 | cg02951526 |
| 1806 | cg03385114 | cg21483216 | cg19622474 |
| 1807 | cg03389789 | cg21273407 | cg26504421 |
| 1808 | cg03393445 | cg20847114 | cg04188241 |
| 1809 | cg03400139 | cg19594745 | cg16163756 |
| 1810 | cg03400491 | cg19495444 | cg24114708 |
| 1811 | cg03407184 | cg19462352 | cg01012242 |
| 1812 | cg03417342 | cg19078037 | cg02619478 |
| 1813 | cg03419014 | cg18203044 | cg21171299 |
| 1814 | cg03420242 | cg17798749 | cg00311883 |
| 1815 | cg03421440 | cg17450505 | cg05781582 |
| 1816 | cg03421964 | cg17439009 | cg10091866 |
| 1817 | cg03424213 | cg17241937 | cg19170881 |
| 1818 | cg03426226 | cg16846503 | cg02857760 |
| 1819 | cg03426615 | cg16517702 | cg08605965 |
| 1820 | cg03431067 | cg16288579 | cg16212219 |
| 1821 | cg03431524 | cg16265932 | cg02009766 |
| 1822 | cg03431903 | cg16116632 | cg04731861 |
| 1823 | cg03434029 | cg15933120 | cg26261270 |
| 1824 | cg03437713 | cg15374133 | cg01534871 |
| 1825 | cg03438101 | cg15232718 | cg23783444 |
| 1826 | cg03441279 | cg14914440 | cg02175033 |
| 1827 | cg03444965 | cg14373988 | cg15168816 |
| 1828 | cg03445151 | cg14272573 | cg01052428 |
| 1829 | cg03452625 | cg14122652 | cg19589800 |
| 1830 | cg03457485 | cg13573244 | cg01741616 |
| 1831 | cg03469682 | cg13408795 | cg05004818 |
| 1832 | cg03482221 | cg13378934 | cg13530474 |
| 1833 | cg03484435 | cg12266049 | cg23259001 |
| 1834 | cg03487040 | cg11609668 | cg10099813 |
| 1835 | cg03488422 | cg11270070 | cg26862316 |
| 1836 | cg03495832 | cg11199137 | cg24928546 |
| 1837 | cg03501128 | cg11025750 | cg10714509 |
| 1838 | cg03501387 | cg10864794 | cg19793499 |
| 1839 | cg03512577 | cg10856972 | cg25517015 |
| 1840 | cg03514843 | cg10681992 | cg07071036 |
| 1841 | cg03515246 | cg10644206 | cg25713411 |
| 1842 | cg03526625 | cg10533694 | cg09868556 |
| 1843 | cg03528037 | cg10024508 | cg17854297 |
| 1844 | cg03528118 | cg10019018 | cg27127017 |
| 1845 | cg03529015 | cg09729166 | cg06125821 |
| 1846 | cg03535239 | cg09029193 | cg20464155 |
| 1847 | cg03538436 | cg08805497 | cg13008252 |
| 1848 | cg03538565 | cg08777316 | cg04860563 |
| 1849 | cg03538922 | cg08218971 | cg03047420 |
| 1850 | cg03540589 | cg07990390 | cg10016364 |
| 1851 | cg03543120 | cg07661965 | cg27302301 |
| 1852 | cg03543319 | cg07095945 | cg22252999 |

|      |            |            |            |
|------|------------|------------|------------|
| 1853 | cg03545972 | cg07083272 | cg19995891 |
| 1854 | cg03549146 | cg06921552 | cg17636309 |
| 1855 | cg03550233 | cg06489615 | cg17860133 |
| 1856 | cg03555203 | cg06061760 | cg01971590 |
| 1857 | cg03556771 | cg06036236 | cg10543634 |
| 1858 | cg03562531 | cg05692420 | cg09356020 |
| 1859 | cg03566001 | cg05360774 | cg22429169 |
| 1860 | cg03571927 | cg05327192 | cg16340152 |
| 1861 | cg03573445 | cg04958227 | cg22685009 |
| 1862 | cg03573679 | cg04884579 | cg10828599 |
| 1863 | cg03575974 | cg04762676 | cg00410534 |
| 1864 | cg03576555 | cg04479713 | cg00607630 |
| 1865 | cg03582793 | cg04360519 | cg12497581 |
| 1866 | cg03583746 | cg04305601 | cg02399019 |
| 1867 | cg03589898 | cg03829194 | cg27250037 |
| 1868 | cg03591954 | cg03613003 | cg15036118 |
| 1869 | cg03596635 | cg03543319 | cg10976861 |
| 1870 | cg03600605 | cg03535239 | cg26268125 |
| 1871 | cg03604011 | cg03431903 | cg21474062 |
| 1872 | cg03606646 | cg03253309 | cg02237875 |
| 1873 | cg03608003 | cg03049782 | cg16009311 |
| 1874 | cg03608520 | cg03013917 | cg14692453 |
| 1875 | cg03613003 | cg02486904 | cg27351239 |
| 1876 | cg03615933 | cg02069095 | cg27641240 |
| 1877 | cg03618741 | cg01837846 | cg10864794 |
| 1878 | cg03621841 | cg01778994 | cg07891483 |
| 1879 | cg03627931 | cg01359676 | cg01017395 |
| 1880 | cg03629926 | cg01272202 | cg25888386 |
| 1881 | cg03630710 | cg00260235 | cg18804667 |
| 1882 | cg03631837 | cg00144414 | cg18758281 |
| 1883 | cg03639152 | cg00028338 | cg01260820 |
| 1884 | cg03639170 | cg00008452 | cg00567872 |
| 1885 | cg03639964 | cg27650212 | cg10034572 |
| 1886 | cg03640215 | cg27375286 | cg18628371 |
| 1887 | cg03644585 | cg27287438 | cg26204042 |
| 1888 | cg03648611 | cg27100436 | cg24748868 |
| 1889 | cg03649353 | cg27040468 | cg01388243 |
| 1890 | cg03655701 | cg26540302 | cg03575974 |
| 1891 | cg03657791 | cg26366087 | cg01664382 |
| 1892 | cg03660377 | cg26245697 | cg15489196 |
| 1893 | cg03661299 | cg25701364 | cg10215501 |
| 1894 | cg03661844 | cg25162533 | cg13521018 |
| 1895 | cg03666300 | cg25134701 | cg06616905 |
| 1896 | cg03666500 | cg24989405 | cg00180097 |
| 1897 | cg03667405 | cg24969902 | cg14118946 |
| 1898 | cg03668470 | cg24386135 | cg01501896 |
| 1899 | cg03669590 | cg24097241 | cg21962025 |
| 1900 | cg03674127 | cg23956760 | cg04815334 |
| 1901 | cg03680680 | cg23946462 | cg22058664 |
| 1902 | cg03683994 | cg23910098 | cg03339668 |
| 1903 | cg03684893 | cg23902076 | cg14290705 |
| 1904 | cg03695693 | cg23350558 | cg04890137 |
| 1905 | cg03696370 | cg23021584 | cg20383521 |

|      |            |            |            |
|------|------------|------------|------------|
| 1906 | cg03701759 | cg22846611 | cg15941159 |
| 1907 | cg03726437 | cg22521416 | cg05529922 |
| 1908 | cg03728898 | cg22472360 | cg09596336 |
| 1909 | cg03730709 | cg21770322 | cg20637405 |
| 1910 | cg03731348 | cg21593628 | cg16704889 |
| 1911 | cg03736774 | cg21408581 | cg14168733 |
| 1912 | cg03736944 | cg21211480 | cg01014262 |
| 1913 | cg03737788 | cg20679271 | cg19357094 |
| 1914 | cg03738365 | cg19611817 | cg02112621 |
| 1915 | cg03761162 | cg19277672 | cg21756355 |
| 1916 | cg03762393 | cg19058262 | cg22699768 |
| 1917 | cg03763874 | cg18729086 | cg14577373 |
| 1918 | cg03764767 | cg18610958 | cg06351520 |
| 1919 | cg03765423 | cg18444673 | cg15770585 |
| 1920 | cg03769734 | cg17755483 | cg07552868 |
| 1921 | cg03773809 | cg17721879 | cg11150559 |
| 1922 | cg03778594 | cg17587997 | cg06597413 |
| 1923 | cg03779937 | cg17021949 | cg27010076 |
| 1924 | cg03782662 | cg16910448 | cg05162523 |
| 1925 | cg03785456 | cg16421653 | cg08692006 |
| 1926 | cg03788408 | cg16172837 | cg27044591 |
| 1927 | cg03789088 | cg16030878 | cg14217074 |
| 1928 | cg03789507 | cg15755154 | cg03550233 |
| 1929 | cg03793055 | cg15637234 | cg15302379 |
| 1930 | cg03796321 | cg15401523 | cg11646638 |
| 1931 | cg03800922 | cg14645880 | cg15368455 |
| 1932 | cg03803102 | cg14231959 | cg07206676 |
| 1933 | cg03808580 | cg13681684 | cg00701514 |
| 1934 | cg03815917 | cg13453203 | cg20751706 |
| 1935 | cg03817675 | cg12878382 | cg06933824 |
| 1936 | cg03818193 | cg12872329 | cg16425726 |
| 1937 | cg03824114 | cg12866859 | cg21145938 |
| 1938 | cg03829194 | cg12403778 | cg07959741 |
| 1939 | cg03834055 | cg12371563 | cg07054804 |
| 1940 | cg03835755 | cg11592677 | cg19668990 |
| 1941 | cg03837909 | cg11400707 | cg10705306 |
| 1942 | cg03841376 | cg10917602 | cg04874782 |
| 1943 | cg03851401 | cg10632728 | cg19445044 |
| 1944 | cg03861097 | cg10520924 | cg01860459 |
| 1945 | cg03872934 | cg10330187 | cg13054419 |
| 1946 | cg03879386 | cg10247864 | cg00701856 |
| 1947 | cg03881382 | cg10233454 | cg17789138 |
| 1948 | cg03884079 | cg09921821 | cg20732160 |
| 1949 | cg03884082 | cg09781414 | cg00981877 |
| 1950 | cg03889044 | cg09657114 | cg03779937 |
| 1951 | cg03899510 | cg09627339 | cg03669590 |
| 1952 | cg03899978 | cg09278623 | cg01364674 |
| 1953 | cg03918756 | cg08932665 | cg08920210 |
| 1954 | cg03919694 | cg07990658 | cg18919478 |
| 1955 | cg03933756 | cg07937803 | cg24247370 |
| 1956 | cg03934478 | cg07907506 | cg04920385 |
| 1957 | cg03938353 | cg07824182 | cg00951857 |
| 1958 | cg03950492 | cg07763497 | cg13297120 |

|      |            |            |            |
|------|------------|------------|------------|
| 1959 | cg03954280 | cg07102406 | cg17818471 |
| 1960 | cg03956820 | cg06814256 | cg09597070 |
| 1961 | cg03958928 | cg06212213 | cg05185038 |
| 1962 | cg03961998 | cg06087826 | cg27409974 |
| 1963 | cg03962809 | cg05899471 | cg07508304 |
| 1964 | cg03965207 | cg05824174 | cg07805999 |
| 1965 | cg03970032 | cg05816786 | cg00784105 |
| 1966 | cg03975834 | cg05698228 | cg04995521 |
| 1967 | cg03977174 | cg05678758 | cg14817655 |
| 1968 | cg03980268 | cg05516390 | cg03072692 |
| 1969 | cg03980715 | cg05403316 | cg00048381 |
| 1970 | cg03985415 | cg05308970 | cg14055379 |
| 1971 | cg03988119 | cg05168015 | cg27073311 |
| 1972 | cg03988952 | cg05150641 | cg20438460 |
| 1973 | cg03991106 | cg04920917 | cg14175330 |
| 1974 | cg03999452 | cg04658841 | cg16463044 |
| 1975 | cg04002063 | cg04601228 | cg14444376 |
| 1976 | cg04002957 | cg04425005 | cg26381919 |
| 1977 | cg04003615 | cg04077677 | cg05308970 |
| 1978 | cg04007841 | cg03991106 | cg12486498 |
| 1979 | cg04009429 | cg03391019 | cg26711406 |
| 1980 | cg04011474 | cg03098837 | cg20800216 |
| 1981 | cg04023831 | cg02495395 | cg14281591 |
| 1982 | cg04025970 | cg02468821 | cg02654449 |
| 1983 | cg04026354 | cg02447268 | cg04791718 |
| 1984 | cg04030444 | cg02157002 | cg11016151 |
| 1985 | cg04034685 | cg02043994 | cg23039189 |
| 1986 | cg04041283 | cg01993468 | cg19839325 |
| 1987 | cg04046364 | cg01972651 | cg16023122 |
| 1988 | cg04055053 | cg01856887 | cg10857774 |
| 1989 | cg04058399 | cg01294717 | cg07888912 |
| 1990 | cg04074404 | cg01147665 | cg22387323 |
| 1991 | cg04077677 | cg01065180 | cg21897315 |
| 1992 | cg04078658 | cg00753492 | cg19709083 |
| 1993 | cg04080724 | cg00554604 | cg25765315 |
| 1994 | cg04086327 | cg00266968 | cg12776287 |
| 1995 | cg04088152 | cg27406975 | cg20852364 |
| 1996 | cg04091961 | cg27039312 | cg21793437 |
| 1997 | cg04095069 | cg26939375 | cg18560638 |
| 1998 | cg04099803 | cg26893743 | cg08625996 |
| 1999 | cg04100337 | cg26867987 | cg01406317 |
| 2000 | cg04100595 | cg26763380 | cg14699728 |
| 2001 | cg04107939 | cg26268125 | cg22305797 |
| 2002 | cg04110886 | cg26262482 | cg01794929 |
| 2003 | cg04113348 | cg26187194 | cg11915444 |
| 2004 | cg04124361 | cg26160492 | cg26475911 |
| 2005 | cg04125460 | cg26143540 | cg13700912 |
| 2006 | cg04129282 | cg25852019 | cg23493018 |
| 2007 | cg04133502 | cg25617157 | cg05564438 |
| 2008 | cg04135242 | cg25606046 | cg13428516 |
| 2009 | cg04140297 | cg25573640 | cg12117658 |
| 2010 | cg04140971 | cg25413575 | cg05916989 |
| 2011 | cg04143348 | cg25372085 | cg19631779 |

|      |            |            |            |
|------|------------|------------|------------|
| 2012 | cg04145522 | cg25247887 | cg19509663 |
| 2013 | cg04145890 | cg25197500 | cg05637092 |
| 2014 | cg04147497 | cg25153629 | cg05133706 |
| 2015 | cg04147875 | cg25135706 | cg17854510 |
| 2016 | cg04155280 | cg25084760 | cg01156295 |
| 2017 | cg04156383 | cg24875415 | cg22845855 |
| 2018 | cg04156643 | cg24767368 | cg20778199 |
| 2019 | cg04157865 | cg24617568 | cg16316042 |
| 2020 | cg04158792 | cg24482246 | cg00409245 |
| 2021 | cg04175417 | cg24288527 | cg06218688 |
| 2022 | cg04183638 | cg23974819 | cg01613294 |
| 2023 | cg04186815 | cg23939875 | cg03668470 |
| 2024 | cg04187433 | cg23522522 | cg01306824 |
| 2025 | cg04194173 | cg23475725 | cg00027650 |
| 2026 | cg04195226 | cg23398508 | cg03743074 |
| 2027 | cg04198125 | cg23366832 | cg05750926 |
| 2028 | cg04208466 | cg23313005 | cg26964426 |
| 2029 | cg04210082 | cg23250795 | cg16711011 |
| 2030 | cg04214430 | cg23196346 | cg21770322 |
| 2031 | cg04216070 | cg23028631 | cg20741105 |
| 2032 | cg04217556 | cg22989033 | cg26178184 |
| 2033 | cg04220455 | cg22638977 | cg11714334 |
| 2034 | cg04226256 | cg22628240 | cg26152017 |
| 2035 | cg04226952 | cg22550309 | cg03339817 |
| 2036 | cg04232282 | cg22329743 | cg07571745 |
| 2037 | cg04234540 | cg22095128 | cg12121782 |
| 2038 | cg04234758 | cg21903817 | cg00827581 |
| 2039 | cg04236512 | cg21847393 | cg13162581 |
| 2040 | cg04240456 | cg21726593 | cg00285343 |
| 2041 | cg04248332 | cg21650193 | cg25946646 |
| 2042 | cg04248364 | cg21251203 | cg09076584 |
| 2043 | cg04249605 | cg21242663 | cg15354065 |
| 2044 | cg04249706 | cg20731213 | cg04403423 |
| 2045 | cg04251828 | cg20140662 | cg25617157 |
| 2046 | cg04260676 | cg20049727 | cg00175487 |
| 2047 | cg04261952 | cg19988492 | cg17966344 |
| 2048 | cg04262465 | cg19513582 | cg17611093 |
| 2049 | cg04269098 | cg19482885 | cg19713196 |
| 2050 | cg04269351 | cg19478343 | cg25275372 |
| 2051 | cg04282530 | cg18526008 | cg01553584 |
| 2052 | cg04285855 | cg18273464 | cg02993070 |
| 2053 | cg04287574 | cg18051353 | cg18325866 |
| 2054 | cg04296187 | cg18045658 | cg01185921 |
| 2055 | cg04304033 | cg17783359 | cg27241873 |
| 2056 | cg04305601 | cg17672035 | cg16474791 |
| 2057 | cg04307274 | cg17400235 | cg13282594 |
| 2058 | cg04312967 | cg17193551 | cg17742459 |
| 2059 | cg04315086 | cg17101681 | cg26934993 |
| 2060 | cg04323313 | cg17046776 | cg06376426 |
| 2061 | cg04324821 | cg16734451 | cg03965207 |
| 2062 | cg04328729 | cg16625770 | cg19089328 |
| 2063 | cg04334792 | cg16392860 | cg25350986 |
| 2064 | cg04348080 | cg16318412 | cg10369955 |

|      |            |            |            |
|------|------------|------------|------------|
| 2065 | cg04349985 | cg16312872 | cg09494609 |
| 2066 | cg04352404 | cg16277922 | cg18870258 |
| 2067 | cg04352763 | cg16159491 | cg19702397 |
| 2068 | cg04354126 | cg16081499 | cg18369325 |
| 2069 | cg04356968 | cg16023107 | cg25019378 |
| 2070 | cg04360147 | cg14817655 | cg25567021 |
| 2071 | cg04360519 | cg14778721 | cg22877380 |
| 2072 | cg04366815 | cg14741474 | cg04601228 |
| 2073 | cg04372182 | cg14711433 | cg14947466 |
| 2074 | cg04375492 | cg14597504 | cg20231900 |
| 2075 | cg04381888 | cg14326472 | cg06194960 |
| 2076 | cg04384031 | cg14326263 | cg15128510 |
| 2077 | cg04386759 | cg14242936 | cg01122461 |
| 2078 | cg04390667 | cg14136214 | cg06889272 |
| 2079 | cg04392554 | cg14125542 | cg01759870 |
| 2080 | cg04394390 | cg13775299 | cg14626525 |
| 2081 | cg04397652 | cg13728069 | cg24960799 |
| 2082 | cg04397884 | cg13171643 | cg08331427 |
| 2083 | cg04398861 | cg13149996 | cg03543120 |
| 2084 | cg04399647 | cg13089599 | cg00715343 |
| 2085 | cg04402828 | cg12308279 | cg11700959 |
| 2086 | cg04402948 | cg12251803 | cg01656717 |
| 2087 | cg04403415 | cg12104982 | cg08606951 |
| 2088 | cg04403423 | cg11835806 | cg00520380 |
| 2089 | cg04410777 | cg11438039 | cg07802350 |
| 2090 | cg04411052 | cg11400143 | cg01930756 |
| 2091 | cg04415736 | cg11275487 | cg10664272 |
| 2092 | cg04425005 | cg10963218 | cg02876276 |
| 2093 | cg04437605 | cg10617494 | cg05253759 |
| 2094 | cg04438661 | cg10543634 | cg17179557 |
| 2095 | cg04454664 | cg10514113 | cg19063061 |
| 2096 | cg04456245 | cg10017293 | cg15627593 |
| 2097 | cg04458219 | cg09858160 | cg05865493 |
| 2098 | cg04460041 | cg09700054 | cg04697056 |
| 2099 | cg04462561 | cg09674368 | cg05670093 |
| 2100 | cg04462774 | cg09358422 | cg03042971 |
| 2101 | cg04465834 | cg09333143 | cg07217341 |
| 2102 | cg04473654 | cg08705647 | cg13736131 |
| 2103 | cg04476286 | cg08458912 | cg17972213 |
| 2104 | cg04482110 | cg08251036 | cg01870976 |
| 2105 | cg04493177 | cg08173959 | cg02959112 |
| 2106 | cg04500730 | cg07832950 | cg06094523 |
| 2107 | cg04505809 | cg07574267 | cg01481251 |
| 2108 | cg04508340 | cg06927337 | cg06142351 |
| 2109 | cg04510807 | cg06880930 | cg25642974 |
| 2110 | cg04512603 | cg06628679 | cg05715751 |
| 2111 | cg04517274 | cg06580014 | cg08506026 |
| 2112 | cg04524477 | cg06477663 | cg08611376 |
| 2113 | cg04529785 | cg06259664 | cg20909380 |
| 2114 | cg04530852 | cg06172939 | cg26620147 |
| 2115 | cg04534503 | cg06017355 | cg17695841 |
| 2116 | cg04535391 | cg05887890 | cg01938025 |
| 2117 | cg04536844 | cg05836492 | cg12384918 |



|      |            |            |            |
|------|------------|------------|------------|
| 2118 | cg04541146 | cg05736906 | cg18475969 |
| 2119 | cg04545872 | cg05267394 | cg00594917 |
| 2120 | cg04546061 | cg05080811 | cg06943845 |
| 2121 | cg04547809 | cg04899175 | cg19495444 |
| 2122 | cg04550439 | cg04650653 | cg23249399 |
| 2123 | cg04555379 | cg04622001 | cg19821361 |
| 2124 | cg04558973 | cg04608722 | cg02363010 |
| 2125 | cg04568774 | cg04410777 | cg09386073 |
| 2126 | cg04573078 | cg04372182 | cg12468255 |
| 2127 | cg04576568 | cg04183638 | cg26723735 |
| 2128 | cg04585669 | cg04125460 | cg00589581 |
| 2129 | cg04591732 | cg04060308 | cg02569718 |
| 2130 | cg04600641 | cg04002063 | cg02628360 |
| 2131 | cg04601228 | cg03884079 | cg03119829 |
| 2132 | cg04604708 | cg03835755 | cg00058291 |
| 2133 | cg04607323 | cg03788408 | cg16422492 |
| 2134 | cg04607844 | cg03469682 | cg09101894 |
| 2135 | cg04608722 | cg03439687 | cg10644206 |
| 2136 | cg04618903 | cg03367519 | cg12019806 |
| 2137 | cg04623131 | cg03287929 | cg27143703 |
| 2138 | cg04627183 | cg03229767 | cg04681879 |
| 2139 | cg04628014 | cg03182608 | cg09309208 |
| 2140 | cg04633661 | cg03177023 | cg04576568 |
| 2141 | cg04654299 | cg03004417 | cg14596589 |
| 2142 | cg04655520 | cg02635482 | cg19502812 |
| 2143 | cg04658707 | cg02481714 | cg20675852 |
| 2144 | cg04658841 | cg02421824 | cg10691866 |
| 2145 | cg04663956 | cg02304580 | cg19084508 |
| 2146 | cg04668631 | cg02304222 | cg08814268 |
| 2147 | cg04674497 | cg02097309 | cg23693485 |
| 2148 | cg04677227 | cg02061967 | cg17876645 |
| 2149 | cg04678901 | cg02009766 | cg06275130 |
| 2150 | cg04679114 | cg01825806 | cg11654662 |
| 2151 | cg04681879 | cg01824284 | cg00187535 |
| 2152 | cg04684246 | cg01537847 | cg04948014 |
| 2153 | cg04687939 | cg01454538 | cg14016236 |
| 2154 | cg04689023 | cg01441113 | cg24600706 |
| 2155 | cg04696969 | cg01120132 | cg09368832 |
| 2156 | cg04697056 | cg00903308 | cg11936643 |
| 2157 | cg04699214 | cg00688539 | cg16489468 |
| 2158 | cg04703221 | cg00374717 | cg13858803 |
| 2159 | cg04703974 | cg00371570 | cg01104466 |
| 2160 | cg04706201 | cg00245896 | cg23850277 |
| 2161 | cg04707715 | cg00236831 | cg18238763 |
| 2162 | cg04708036 | cg00085256 | cg25283432 |
| 2163 | cg04717045 | cg00042325 | cg26143540 |
| 2164 | cg04719721 | cg27579131 | cg08317243 |
| 2165 | cg04724190 | cg27549186 | cg08740088 |
| 2166 | cg04724387 | cg27498434 | cg07015803 |
| 2167 | cg04727924 | cg27454102 | cg24052817 |
| 2168 | cg04729730 | cg27144884 | cg25595431 |
| 2169 | cg04731861 | cg26868306 | cg11840849 |
| 2170 | cg04743876 | cg26745294 | cg24897108 |

|      |            |            |            |
|------|------------|------------|------------|
| 2171 | cg04744514 | cg26446949 | cg14037652 |
| 2172 | cg04745820 | cg26338030 | cg06573945 |
| 2173 | cg04751761 | cg25607321 | cg16885557 |
| 2174 | cg04767697 | cg25588826 | cg02816367 |
| 2175 | cg04774476 | cg25502179 | cg12747076 |
| 2176 | cg04774496 | cg25476129 | cg21837323 |
| 2177 | cg04777612 | cg25283432 | cg18720622 |
| 2178 | cg04780481 | cg24706981 | cg01306747 |
| 2179 | cg04784212 | cg24673886 | cg17291826 |
| 2180 | cg04787317 | cg24135645 | cg03091010 |
| 2181 | cg04791718 | cg24035682 | cg23623681 |
| 2182 | cg04797170 | cg23973885 | cg02131465 |
| 2183 | cg04800347 | cg23925540 | cg04550439 |
| 2184 | cg04803994 | cg22846809 | cg05360774 |
| 2185 | cg04804094 | cg22584802 | cg27320213 |
| 2186 | cg04804648 | cg22439641 | cg09835239 |
| 2187 | cg04805065 | cg21171279 | cg11190890 |
| 2188 | cg04806664 | cg20690695 | cg08535779 |
| 2189 | cg04813695 | cg20679011 | cg13761321 |
| 2190 | cg04815334 | cg20516209 | cg10278394 |
| 2191 | cg04815973 | cg20333027 | cg14476630 |
| 2192 | cg04819180 | cg19802929 | cg02157052 |
| 2193 | cg04820362 | cg19791606 | cg07236812 |
| 2194 | cg04837783 | cg19548479 | cg18881778 |
| 2195 | cg04839616 | cg19201770 | cg09812790 |
| 2196 | cg04843690 | cg18801945 | cg11272874 |
| 2197 | cg04843968 | cg18729681 | cg19494591 |
| 2198 | cg04844977 | cg18369990 | cg25137314 |
| 2199 | cg04846781 | cg18153137 | cg09233395 |
| 2200 | cg04860563 | cg18067847 | cg02966841 |
| 2201 | cg04868238 | cg18032164 | cg05161923 |
| 2202 | cg04872027 | cg18013789 | cg09675604 |
| 2203 | cg04873169 | cg17680611 | cg16236270 |
| 2204 | cg04874782 | cg17475304 | cg27618145 |
| 2205 | cg04880940 | cg17442932 | cg04505897 |
| 2206 | cg04882759 | cg17067528 | cg26137103 |
| 2207 | cg04884579 | cg16998564 | cg09612502 |
| 2208 | cg04885333 | cg16668903 | cg16283362 |
| 2209 | cg04890137 | cg16452866 | cg03050965 |
| 2210 | cg04899175 | cg16452651 | cg16499415 |
| 2211 | cg04902542 | cg16285424 | cg08364860 |
| 2212 | cg04904609 | cg16092370 | cg05899471 |
| 2213 | cg04910179 | cg16078863 | cg23812660 |
| 2214 | cg04911180 | cg15969277 | cg24844449 |
| 2215 | cg04911307 | cg15874642 | cg07547336 |
| 2216 | cg04911680 | cg15813460 | cg27441486 |
| 2217 | cg04914198 | cg15582707 | cg04402948 |
| 2218 | cg04920385 | cg15411034 | cg02556345 |
| 2219 | cg04920917 | cg15368455 | cg08458637 |
| 2220 | cg04921335 | cg15326069 | cg19162768 |
| 2221 | cg04924028 | cg15117891 | cg11080651 |
| 2222 | cg04926380 | cg14679558 | cg23525541 |
| 2223 | cg04929165 | cg14588828 | cg02844593 |

|      |            |            |            |
|------|------------|------------|------------|
| 2224 | cg04930596 | cg14443041 | cg08038054 |
| 2225 | cg04944177 | cg14438213 | cg20018563 |
| 2226 | cg04944536 | cg14412134 | cg18817831 |
| 2227 | cg04945557 | cg14228788 | cg17319795 |
| 2228 | cg04948014 | cg13877974 | cg22052672 |
| 2229 | cg04955856 | cg13708635 | cg07818978 |
| 2230 | cg04956511 | cg13618969 | cg00412772 |
| 2231 | cg04958227 | cg13385220 | cg26939375 |
| 2232 | cg04961225 | cg13264394 | cg02325128 |
| 2233 | cg04963697 | cg13148544 | cg06919693 |
| 2234 | cg04964845 | cg13105904 | cg16509173 |
| 2235 | cg04966586 | cg13058457 | cg03543319 |
| 2236 | cg04967009 | cg12486498 | cg25862117 |
| 2237 | cg04967410 | cg12293340 | cg11585280 |
| 2238 | cg04968127 | cg12075928 | cg14288326 |
| 2239 | cg04972957 | cg11457582 | cg25652751 |
| 2240 | cg04982190 | cg11035122 | cg05099063 |
| 2241 | cg04983933 | cg10904856 | cg03380744 |
| 2242 | cg04986373 | cg10737521 | cg23457862 |
| 2243 | cg04990420 | cg10705306 | cg01946510 |
| 2244 | cg04993279 | cg10590657 | cg20382418 |
| 2245 | cg04995521 | cg10558233 | cg09859805 |
| 2246 | cg04997235 | cg10356060 | cg10404601 |
| 2247 | cg05002642 | cg10338518 | cg25386426 |
| 2248 | cg05004818 | cg10311754 | cg04236512 |
| 2249 | cg05013912 | cg09950920 | cg23301563 |
| 2250 | cg05016508 | cg09828346 | cg03918756 |
| 2251 | cg05017639 | cg09712234 | cg25383568 |
| 2252 | cg05024916 | cg09489567 | cg08112616 |
| 2253 | cg05030450 | cg09464883 | cg00999267 |
| 2254 | cg05032848 | cg09141835 | cg19897003 |
| 2255 | cg05037360 | cg08993878 | cg19991046 |
| 2256 | cg05037556 | cg08823975 | cg27177779 |
| 2257 | cg05040210 | cg08812108 | cg26828494 |
| 2258 | cg05041061 | cg08712631 | cg08628233 |
| 2259 | cg05041265 | cg08703151 | cg13737493 |
| 2260 | cg05041871 | cg08642081 | cg13543915 |
| 2261 | cg05051393 | cg08276889 | cg10827460 |
| 2262 | cg05051734 | cg08206881 | cg14698794 |
| 2263 | cg05054460 | cg08151983 | cg00074348 |
| 2264 | cg05056653 | cg07976390 | cg02066343 |
| 2265 | cg05057834 | cg07880135 | cg03573445 |
| 2266 | cg05058103 | cg07876450 | cg20805475 |
| 2267 | cg05060427 | cg07410188 | cg07346310 |
| 2268 | cg05060686 | cg07036799 | cg14630692 |
| 2269 | cg05065603 | cg07012739 | cg01158079 |
| 2270 | cg05069728 | cg06981182 | cg25339612 |
| 2271 | cg05070608 | cg06868569 | cg07050611 |
| 2272 | cg05073386 | cg06772578 | cg02940562 |
| 2273 | cg05076082 | cg06705004 | cg10888242 |
| 2274 | cg05080811 | cg06259557 | cg15424477 |
| 2275 | cg05088513 | cg05917480 | cg15546071 |
| 2276 | cg05088605 | cg05816006 | cg05452742 |

|      |            |            |            |
|------|------------|------------|------------|
| 2277 | cg05088794 | cg05664352 | cg09358481 |
| 2278 | cg05099063 | cg05181397 | cg16582732 |
| 2279 | cg05099221 | cg04982190 | cg21619325 |
| 2280 | cg05101437 | cg04968127 | cg22987116 |
| 2281 | cg05109049 | cg04791718 | cg19048950 |
| 2282 | cg05112986 | cg04703974 | cg09322899 |
| 2283 | cg05133706 | cg04582672 | cg14126884 |
| 2284 | cg05134769 | cg04175292 | cg25479732 |
| 2285 | cg05141289 | cg04133502 | cg14360029 |
| 2286 | cg05145297 | cg03695693 | cg18765405 |
| 2287 | cg05150667 | cg03657791 | cg13818316 |
| 2288 | cg05150697 | cg03178838 | cg04708036 |
| 2289 | cg05159066 | cg03044471 | cg03640756 |
| 2290 | cg05161923 | cg02951526 | cg07990390 |
| 2291 | cg05162523 | cg02931058 | cg15968604 |
| 2292 | cg05168015 | cg02838178 | cg21806750 |
| 2293 | cg05179396 | cg02366931 | cg11844464 |
| 2294 | cg05180954 | cg02066441 | cg16258545 |
| 2295 | cg05185019 | cg02011409 | cg24394336 |
| 2296 | cg05185038 | cg02003612 | cg26421308 |
| 2297 | cg05185926 | cg01971590 | cg07310500 |
| 2298 | cg05188868 | cg01606770 | cg01303236 |
| 2299 | cg05190559 | cg01486610 | cg12179658 |
| 2300 | cg05194102 | cg01398428 | cg05797224 |
| 2301 | cg05196820 | cg01293277 | cg10296062 |
| 2302 | cg05201300 | cg00961932 | cg05999324 |
| 2303 | cg05202347 | cg00707452 | cg25476129 |
| 2304 | cg05202424 | cg00686915 | cg24097241 |
| 2305 | cg05204104 | cg00677217 | cg21332304 |
| 2306 | cg05210671 | cg00624949 | cg04095069 |
| 2307 | cg05218696 | cg00592695 | cg11284582 |
| 2308 | cg05220083 | cg00158530 | cg16337430 |
| 2309 | cg05223346 | cg00061185 | cg02317251 |
| 2310 | cg05224498 | cg00038342 | cg13455439 |
| 2311 | cg05229528 | cg27585557 | cg06927337 |
| 2312 | cg05235248 | cg27248741 | cg08886695 |
| 2313 | cg05242371 | cg27177415 | cg21155834 |
| 2314 | cg05249271 | cg27100471 | cg03445151 |
| 2315 | cg05251593 | cg27096981 | cg04234540 |
| 2316 | cg05253759 | cg27092248 | cg19201144 |
| 2317 | cg05258102 | cg26672794 | cg24479752 |
| 2318 | cg05260236 | cg26607528 | cg10370305 |
| 2319 | cg05267269 | cg26341003 | cg20000602 |
| 2320 | cg05267394 | cg26284638 | cg14921326 |
| 2321 | cg05270552 | cg26068595 | cg06649282 |
| 2322 | cg05272587 | cg26014373 | cg03879386 |
| 2323 | cg05272807 | cg26007445 | cg25488990 |
| 2324 | cg05279172 | cg25947619 | cg05529123 |
| 2325 | cg05279866 | cg25714956 | cg18440069 |
| 2326 | cg05280797 | cg25666403 | cg02384859 |
| 2327 | cg05283542 | cg25625457 | cg10921517 |
| 2328 | cg05286252 | cg25604994 | cg06989443 |
| 2329 | cg05288253 | cg25352924 | cg06328338 |

|      |            |            |            |
|------|------------|------------|------------|
| 2330 | cg05289897 | cg25321935 | cg15944060 |
| 2331 | cg05291588 | cg25221919 | cg24783499 |
| 2332 | cg05294455 | cg24752354 | cg03355204 |
| 2333 | cg05299486 | cg24502047 | cg27186013 |
| 2334 | cg05303899 | cg24448421 | cg01176141 |
| 2335 | cg05307141 | cg24425531 | cg10338364 |
| 2336 | cg05308970 | cg24247370 | cg11958668 |
| 2337 | cg05309505 | cg24197051 | cg26420566 |
| 2338 | cg05309989 | cg24052817 | cg20323175 |
| 2339 | cg05317605 | cg23916878 | cg13542073 |
| 2340 | cg05322217 | cg23760873 | cg11319760 |
| 2341 | cg05324992 | cg23415916 | cg16142965 |
| 2342 | cg05334190 | cg23260554 | cg07336123 |
| 2343 | cg05336268 | cg23251296 | cg16828491 |
| 2344 | cg05337637 | cg22805632 | cg02008511 |
| 2345 | cg05339066 | cg22750845 | cg05468559 |
| 2346 | cg05340240 | cg22720481 | cg21528927 |
| 2347 | cg05340658 | cg22371518 | cg08097359 |
| 2348 | cg05341539 | cg22272218 | cg24003508 |
| 2349 | cg05346688 | cg21889263 | cg07044523 |
| 2350 | cg05349039 | cg21511816 | cg11844358 |
| 2351 | cg05350020 | cg21434355 | cg11802013 |
| 2352 | cg05360477 | cg21352006 | cg02331025 |
| 2353 | cg05360774 | cg21331845 | cg02725453 |
| 2354 | cg05361262 | cg21118367 | cg22593342 |
| 2355 | cg05364570 | cg20971998 | cg07582655 |
| 2356 | cg05368595 | cg20927312 | cg26315985 |
| 2357 | cg05368971 | cg20767977 | cg14437446 |
| 2358 | cg05369142 | cg20571592 | cg13852730 |
| 2359 | cg05370752 | cg20341998 | cg20027456 |
| 2360 | cg05376738 | cg20210151 | cg22257056 |
| 2361 | cg05380734 | cg20078454 | cg27478167 |
| 2362 | cg05384450 | cg19770281 | cg14565781 |
| 2363 | cg05386977 | cg19698242 | cg01197763 |
| 2364 | cg05388880 | cg19623406 | cg06900571 |
| 2365 | cg05390712 | cg19584674 | cg00663077 |
| 2366 | cg05397809 | cg19561607 | cg05035470 |
| 2367 | cg05400196 | cg19514469 | cg17030415 |
| 2368 | cg05400252 | cg19018155 | cg17511604 |
| 2369 | cg05403316 | cg18869485 | cg24191821 |
| 2370 | cg05404117 | cg18761894 | cg07266910 |
| 2371 | cg05404787 | cg18758976 | cg21863721 |
| 2372 | cg05409945 | cg18378662 | cg01730064 |
| 2373 | cg05415936 | cg18325866 | cg11547122 |
| 2374 | cg05418508 | cg18241094 | cg20547131 |
| 2375 | cg05418719 | cg18225577 | cg00920668 |
| 2376 | cg05426006 | cg17781958 | cg20471017 |
| 2377 | cg05434397 | cg17636986 | cg06109482 |
| 2378 | cg05450563 | cg17473727 | cg09825670 |
| 2379 | cg05452391 | cg17250537 | cg25236277 |
| 2380 | cg05452742 | cg17094249 | cg04210082 |
| 2381 | cg05459650 | cg16694664 | cg11998932 |
| 2382 | cg05469118 | cg16653700 | cg19842026 |

|      |            |            |            |
|------|------------|------------|------------|
| 2383 | cg05477920 | cg16649474 | cg10492836 |
| 2384 | cg05479174 | cg16626731 | cg24183575 |
| 2385 | cg05482864 | cg16349616 | cg19646759 |
| 2386 | cg05482973 | cg16142965 | cg07290269 |
| 2387 | cg05483875 | cg16126178 | cg10149870 |
| 2388 | cg05484458 | cg16067210 | cg14393609 |
| 2389 | cg05494073 | cg15637254 | cg11496593 |
| 2390 | cg05498905 | cg15425427 | cg18148488 |
| 2391 | cg05503991 | cg15111351 | cg13500797 |
| 2392 | cg05504354 | cg15081886 | cg02013018 |
| 2393 | cg05506498 | cg15033511 | cg05776138 |
| 2394 | cg05508315 | cg14842237 | cg06232205 |
| 2395 | cg05515072 | cg14839830 | cg01523759 |
| 2396 | cg05516390 | cg14819399 | cg11538848 |
| 2397 | cg05517824 | cg14641266 | cg17056676 |
| 2398 | cg05528280 | cg14560240 | cg05931119 |
| 2399 | cg05529123 | cg14550212 | cg07344990 |
| 2400 | cg05529922 | cg14274896 | cg01705036 |
| 2401 | cg05535123 | cg14264773 | cg02829279 |
| 2402 | cg05536457 | cg14234732 | cg07133097 |
| 2403 | cg05539509 | cg13947999 | cg13982956 |
| 2404 | cg05544807 | cg13857210 | cg03788408 |
| 2405 | cg05552543 | cg13737493 | cg00927435 |
| 2406 | cg05554592 | cg13637654 | cg02202664 |
| 2407 | cg05555455 | cg13572069 | cg05544807 |
| 2408 | cg05559648 | cg13367537 | cg17442683 |
| 2409 | cg05561386 | cg12914733 | cg07487572 |
| 2410 | cg05564438 | cg12776287 | cg23401796 |
| 2411 | cg05579549 | cg12732734 | cg18279126 |
| 2412 | cg05584950 | cg12598178 | cg22076676 |
| 2413 | cg05585379 | cg12526346 | cg18397743 |
| 2414 | cg05588341 | cg12352896 | cg06539449 |
| 2415 | cg05590156 | cg12195230 | cg01518755 |
| 2416 | cg05590948 | cg12005412 | cg27288127 |
| 2417 | cg05591270 | cg11936643 | cg14312334 |
| 2418 | cg05591701 | cg11854392 | cg17958516 |
| 2419 | cg05595142 | cg11743827 | cg01810186 |
| 2420 | cg05595469 | cg11562411 | cg07374490 |
| 2421 | cg05603553 | cg11321921 | cg02958947 |
| 2422 | cg05615230 | cg11116288 | cg06796435 |
| 2423 | cg05615477 | cg10799492 | cg05862007 |
| 2424 | cg05621583 | cg10507988 | cg12245876 |
| 2425 | cg05623411 | cg10461264 | cg20494661 |
| 2426 | cg05634149 | cg10319905 | cg00604356 |
| 2427 | cg05637092 | cg10225755 | cg20210637 |
| 2428 | cg05650238 | cg09920043 | cg06363798 |
| 2429 | cg05651243 | cg09597710 | cg18526008 |
| 2430 | cg05657292 | cg09586198 | cg08812108 |
| 2431 | cg05658807 | cg09553581 | cg03469682 |
| 2432 | cg05662839 | cg09465065 | cg00185413 |
| 2433 | cg05670093 | cg09373983 | cg00656603 |
| 2434 | cg05678758 | cg09358481 | cg23363971 |
| 2435 | cg05680710 | cg09119854 | cg17821664 |

|      |            |            |            |
|------|------------|------------|------------|
| 2436 | cg05682319 | cg08972190 | cg02643834 |
| 2437 | cg05692420 | cg08824291 | cg20334115 |
| 2438 | cg05698228 | cg08692006 | cg16081499 |
| 2439 | cg05703996 | cg08677210 | cg21811911 |
| 2440 | cg05705335 | cg08661751 | cg23366832 |
| 2441 | cg05711037 | cg08613794 | cg00131423 |
| 2442 | cg05712931 | cg08447373 | cg04002063 |
| 2443 | cg05714748 | cg08378932 | cg14890730 |
| 2444 | cg05715422 | cg08369014 | cg09251291 |
| 2445 | cg05715751 | cg08132025 | cg20662658 |
| 2446 | cg05724271 | cg08110337 | cg10004897 |
| 2447 | cg05727180 | cg08043592 | cg25588826 |
| 2448 | cg05730150 | cg07992340 | cg11197908 |
| 2449 | cg05736906 | cg07965110 | cg10147974 |
| 2450 | cg05738470 | cg07875385 | cg21105227 |
| 2451 | cg05738687 | cg07802350 | cg16030878 |
| 2452 | cg05757474 | cg07795968 | cg15854022 |
| 2453 | cg05757530 | cg07447742 | cg24037270 |
| 2454 | cg05767015 | cg07409629 | cg02393496 |
| 2455 | cg05767299 | cg07398661 | cg26955275 |
| 2456 | cg05770240 | cg07116732 | cg06371044 |
| 2457 | cg05771342 | cg07109453 | cg04784315 |
| 2458 | cg05776138 | cg07094993 | cg14114546 |
| 2459 | cg05777316 | cg06864351 | cg12579684 |
| 2460 | cg05781582 | cg06857516 | cg09076960 |
| 2461 | cg05798126 | cg06758191 | cg04882759 |
| 2462 | cg05798436 | cg06611426 | cg11718965 |
| 2463 | cg05801879 | cg06579465 | cg23388085 |
| 2464 | cg05816006 | cg06525127 | cg23953820 |
| 2465 | cg05816041 | cg06422467 | cg02119693 |
| 2466 | cg05817833 | cg06376598 | cg09913449 |
| 2467 | cg05821186 | cg06204229 | cg12442385 |
| 2468 | cg05823589 | cg06200092 | cg13793145 |
| 2469 | cg05824174 | cg06109482 | cg12678686 |
| 2470 | cg05824594 | cg05865493 | cg12927715 |
| 2471 | cg05825120 | cg05380734 | cg16572603 |
| 2472 | cg05826596 | cg05370752 | cg24075760 |
| 2473 | cg05832823 | cg05168368 | cg17113147 |
| 2474 | cg05833851 | cg04964845 | cg02323633 |
| 2475 | cg05836492 | cg04910179 | cg05397809 |
| 2476 | cg05845879 | cg04880940 | cg24083817 |
| 2477 | cg05846044 | cg04847478 | cg26740525 |
| 2478 | cg05846633 | cg04431002 | cg03370270 |
| 2479 | cg05851042 | cg04234540 | cg03426226 |
| 2480 | cg05851887 | cg04208466 | cg21647035 |
| 2481 | cg05854826 | cg03934478 | cg21494132 |
| 2482 | cg05856230 | cg03884082 | cg00852414 |
| 2483 | cg05858079 | cg03785456 | cg04819180 |
| 2484 | cg05862007 | cg03722184 | cg02920396 |
| 2485 | cg05865493 | cg03683994 | cg11035122 |
| 2486 | cg05865548 | cg03421964 | cg23280999 |
| 2487 | cg05867158 | cg03376089 | cg25202370 |
| 2488 | cg05869732 | cg03119088 | cg12725520 |

|      |            |            |            |
|------|------------|------------|------------|
| 2489 | cg05874233 | cg02857760 | cg25903122 |
| 2490 | cg05876246 | cg02650017 | cg24590353 |
| 2491 | cg05887890 | cg02452418 | cg08892499 |
| 2492 | cg05888037 | cg02332902 | cg16365663 |
| 2493 | cg05894015 | cg02262037 | cg09554406 |
| 2494 | cg05898188 | cg02087101 | cg11346522 |
| 2495 | cg05899507 | cg01902704 | cg15104211 |
| 2496 | cg05900955 | cg01634146 | cg04983933 |
| 2497 | cg05909553 | cg01579765 | cg24926121 |
| 2498 | cg05909702 | cg01559787 | cg01592387 |
| 2499 | cg05915622 | cg01512113 | cg27168410 |
| 2500 | cg05916989 | cg01277910 | cg22048683 |
| 2501 | cg05917480 | cg01156295 | cg08613144 |
| 2502 | cg05918682 | cg01017228 | cg00710466 |
| 2503 | cg05934824 | cg00820405 | cg11847597 |
| 2504 | cg05945030 | cg00169184 | cg05579549 |
| 2505 | cg05949181 | cg00133595 | cg10129154 |
| 2506 | cg05951828 | cg00103778 | cg10809282 |
| 2507 | cg05966978 | cg00074348 | cg00941576 |
| 2508 | cg05968917 | cg27514730 | cg20090162 |
| 2509 | cg05970317 | cg27247807 | cg01362762 |
| 2510 | cg05971891 | cg27203917 | cg04086327 |
| 2511 | cg05975710 | cg27192012 | cg22908922 |
| 2512 | cg05976168 | cg27133959 | cg13086402 |
| 2513 | cg05977276 | cg27096087 | cg07433453 |
| 2514 | cg05977523 | cg27074355 | cg21032564 |
| 2515 | cg05978010 | cg26955275 | cg08904630 |
| 2516 | cg05982473 | cg26884345 | cg27118035 |
| 2517 | cg05989746 | cg26862316 | cg19020855 |
| 2518 | cg05995260 | cg26794830 | cg07333510 |
| 2519 | cg05996835 | cg26668872 | cg19444998 |
| 2520 | cg05999324 | cg26653360 | cg06823034 |
| 2521 | cg06008803 | cg26503644 | cg05058103 |
| 2522 | cg06012410 | cg26448137 | cg13657511 |
| 2523 | cg06012483 | cg26144207 | cg07132183 |
| 2524 | cg06013127 | cg26030804 | cg20943461 |
| 2525 | cg06017355 | cg26013235 | cg04462561 |
| 2526 | cg06018095 | cg25825612 | cg17534540 |
| 2527 | cg06028151 | cg25629077 | cg12075498 |
| 2528 | cg06033488 | cg25350986 | cg08737189 |
| 2529 | cg06036236 | cg25350827 | cg22803510 |
| 2530 | cg06038180 | cg25289803 | cg00857907 |
| 2531 | cg06056558 | cg25167447 | cg26882115 |
| 2532 | cg06058262 | cg24930851 | cg17819085 |
| 2533 | cg06061092 | cg24866203 | cg14403241 |
| 2534 | cg06068392 | cg24856699 | cg19340420 |
| 2535 | cg06070445 | cg24825262 | cg15391531 |
| 2536 | cg06078337 | cg24824472 | cg13763482 |
| 2537 | cg06084403 | cg24773418 | cg16560256 |
| 2538 | cg06085713 | cg24495350 | cg06200092 |
| 2539 | cg06087826 | cg24233679 | cg17361593 |
| 2540 | cg06090895 | cg24030630 | cg04060308 |
| 2541 | cg06093152 | cg23754431 | cg02729303 |



|      |            |            |            |
|------|------------|------------|------------|
| 2542 | cg06094523 | cg23388085 | cg16759204 |
| 2543 | cg06096901 | cg23288298 | cg13654085 |
| 2544 | cg06104859 | cg22765117 | cg11902934 |
| 2545 | cg06109284 | cg22730007 | cg23630423 |
| 2546 | cg06109482 | cg22482278 | cg04761077 |
| 2547 | cg06113801 | cg22461758 | cg00622702 |
| 2548 | cg06115826 | cg22348713 | cg08616663 |
| 2549 | cg06120235 | cg22325145 | cg01723892 |
| 2550 | cg06123891 | cg22082745 | cg05876246 |
| 2551 | cg06124434 | cg21906519 | cg05887890 |
| 2552 | cg06125821 | cg21863499 | cg14401746 |
| 2553 | cg06132803 | cg21696975 | cg09524658 |
| 2554 | cg06142351 | cg21406967 | cg25834632 |
| 2555 | cg06143290 | cg21255128 | cg15541630 |
| 2556 | cg06154633 | cg20892492 | cg18444673 |
| 2557 | cg06159340 | cg20852364 | cg23408104 |
| 2558 | cg06167719 | cg20464155 | cg23237976 |
| 2559 | cg06172939 | cg20165037 | cg00500424 |
| 2560 | cg06173481 | cg20095124 | cg16867086 |
| 2561 | cg06174078 | cg19949955 | cg06752365 |
| 2562 | cg06179971 | cg19849478 | cg24775327 |
| 2563 | cg06194960 | cg19765175 | cg11037787 |
| 2564 | cg06198069 | cg19565757 | cg09637963 |
| 2565 | cg06200092 | cg19016264 | cg14642045 |
| 2566 | cg06200670 | cg18863119 | cg15374133 |
| 2567 | cg06208158 | cg18857588 | cg26315221 |
| 2568 | cg06208229 | cg18795383 | cg19827875 |
| 2569 | cg06208270 | cg18285813 | cg04573078 |
| 2570 | cg06212213 | cg18201671 | cg05261433 |
| 2571 | cg06212263 | cg18108009 | cg09293488 |
| 2572 | cg06212582 | cg18083415 | cg08740008 |
| 2573 | cg06213876 | cg17817350 | cg02272751 |
| 2574 | cg06219670 | cg17683336 | cg04399631 |
| 2575 | cg06219732 | cg17442683 | cg21735516 |
| 2576 | cg06225767 | cg17367901 | cg13763232 |
| 2577 | cg06232205 | cg17364872 | cg06646728 |
| 2578 | cg06233301 | cg17202331 | cg12609948 |
| 2579 | cg06237774 | cg17174566 | cg09109383 |
| 2580 | cg06241044 | cg17156862 | cg07005960 |
| 2581 | cg06241812 | cg16897800 | cg20379239 |
| 2582 | cg06246000 | cg16711084 | cg25761326 |
| 2583 | cg06251016 | cg16666964 | cg10731848 |
| 2584 | cg06252645 | cg16640450 | cg01661567 |
| 2585 | cg06254425 | cg16629076 | cg15693937 |
| 2586 | cg06255601 | cg16621790 | cg25484139 |
| 2587 | cg06255609 | cg16402415 | cg24916358 |
| 2588 | cg06257110 | cg16238993 | cg09375892 |
| 2589 | cg06264060 | cg16081096 | cg03977174 |
| 2590 | cg06267617 | cg15250073 | cg17901582 |
| 2591 | cg06272543 | cg15228983 | cg18699466 |
| 2592 | cg06275130 | cg14983540 | cg21329649 |
| 2593 | cg06290096 | cg14878988 | cg24137511 |
| 2594 | cg06292891 | cg14601444 | cg03345925 |

|      |            |            |            |
|------|------------|------------|------------|
| 2595 | cg06294856 | cg14571537 | cg08860136 |
| 2596 | cg06294954 | cg14389425 | cg08307171 |
| 2597 | cg06309980 | cg14337844 | cg00542261 |
| 2598 | cg06313479 | cg14199827 | cg27548256 |
| 2599 | cg06321304 | cg14055379 | cg17156862 |
| 2600 | cg06328338 | cg13910681 | cg22921096 |
| 2601 | cg06333135 | cg13700912 | cg12079279 |
| 2602 | cg06338958 | cg13517605 | cg05309989 |
| 2603 | cg06342954 | cg13508949 | cg22525688 |
| 2604 | cg06351520 | cg13414654 | cg00675878 |
| 2605 | cg06355908 | cg13287523 | cg21230793 |
| 2606 | cg06363798 | cg13278004 | cg10190898 |
| 2607 | cg06368978 | cg13154622 | cg10101600 |
| 2608 | cg06369532 | cg12549211 | cg01545140 |
| 2609 | cg06371044 | cg12179658 | cg15264708 |
| 2610 | cg06376426 | cg11912239 | cg00400992 |
| 2611 | cg06377278 | cg11761615 | cg20065217 |
| 2612 | cg06378490 | cg11703759 | cg17017404 |
| 2613 | cg06379876 | cg11650648 | cg01578875 |
| 2614 | cg06385449 | cg11530995 | cg06864351 |
| 2615 | cg06386880 | cg11423998 | cg03181382 |
| 2616 | cg06387204 | cg11311843 | cg04612073 |
| 2617 | cg06387842 | cg11115867 | cg07394799 |
| 2618 | cg06389574 | cg11108115 | cg16609966 |
| 2619 | cg06397381 | cg11068930 | cg03125765 |
| 2620 | cg06400255 | cg10898310 | cg27485845 |
| 2621 | cg06406157 | cg10813908 | cg09180239 |
| 2622 | cg06407371 | cg10724774 | cg20773915 |
| 2623 | cg06407441 | cg10174683 | cg00562504 |
| 2624 | cg06415302 | cg10082445 | cg07048592 |
| 2625 | cg06419732 | cg09634481 | cg13996750 |
| 2626 | cg06422467 | cg09524658 | cg04842880 |
| 2627 | cg06422947 | cg09486967 | cg11888747 |
| 2628 | cg06432200 | cg09375892 | cg08186671 |
| 2629 | cg06436663 | cg09326135 | cg16242615 |
| 2630 | cg06439736 | cg09293488 | cg04787317 |
| 2631 | cg06445533 | cg09198138 | cg24155123 |
| 2632 | cg06456125 | cg08986727 | cg00729995 |
| 2633 | cg06463230 | cg08847512 | cg13162609 |
| 2634 | cg06474428 | cg08695912 | cg05934824 |
| 2635 | cg06477663 | cg08681293 | cg11691844 |
| 2636 | cg06485166 | cg08628233 | cg24093182 |
| 2637 | cg06489615 | cg08463581 | cg07965566 |
| 2638 | cg06492744 | cg08400424 | cg09631175 |
| 2639 | cg06497934 | cg08342966 | cg15661715 |
| 2640 | cg06500727 | cg08193650 | cg25382652 |
| 2641 | cg06504636 | cg08186671 | cg08412215 |
| 2642 | cg06506523 | cg08113187 | cg25430713 |
| 2643 | cg06518233 | cg08108655 | cg23429698 |
| 2644 | cg06521357 | cg08095452 | cg09389557 |
| 2645 | cg06522179 | cg07915976 | cg05970317 |
| 2646 | cg06524531 | cg07888912 | cg10107330 |
| 2647 | cg06525127 | cg07826642 | cg00501242 |

|      |            |            |            |
|------|------------|------------|------------|
| 2648 | cg06528340 | cg07811002 | cg15460348 |
| 2649 | cg06530983 | cg07720334 | cg05917419 |
| 2650 | cg06532257 | cg07374490 | cg02043994 |
| 2651 | cg06537333 | cg07270259 | cg00899463 |
| 2652 | cg06537652 | cg07187503 | cg00158770 |
| 2653 | cg06537744 | cg07127410 | cg02306481 |
| 2654 | cg06539449 | cg07085590 | cg23990272 |
| 2655 | cg06541938 | cg07071036 | cg06219732 |
| 2656 | cg06546521 | cg06947205 | cg03488422 |
| 2657 | cg06549228 | cg06809295 | cg13171107 |
| 2658 | cg06551007 | cg06808089 | cg08098420 |
| 2659 | cg06553058 | cg06760467 | cg07624888 |
| 2660 | cg06553975 | cg06646728 | cg00209623 |
| 2661 | cg06556244 | cg06642012 | cg05602356 |
| 2662 | cg06561892 | cg06551007 | cg14758812 |
| 2663 | cg06562888 | cg06013127 | cg10496150 |
| 2664 | cg06566615 | cg05995260 | cg07740306 |
| 2665 | cg06568783 | cg05851887 | cg20049727 |
| 2666 | cg06572904 | cg05479174 | cg09425164 |
| 2667 | cg06573945 | cg05210671 | cg15991104 |
| 2668 | cg06577703 | cg05159066 | cg05017639 |
| 2669 | cg06579465 | cg05101437 | cg06840243 |
| 2670 | cg06580014 | cg04658707 | cg11390504 |
| 2671 | cg06584329 | cg04324821 | cg22461758 |
| 2672 | cg06586578 | cg04315086 | cg01634146 |
| 2673 | cg06597413 | cg04307274 | cg06537333 |
| 2674 | cg06599914 | cg04131010 | cg21552014 |
| 2675 | cg06604690 | cg04058399 | cg19548524 |
| 2676 | cg06607764 | cg04030444 | cg25545917 |
| 2677 | cg06610254 | cg03684893 | cg06525127 |
| 2678 | cg06611426 | cg03583746 | cg01792640 |
| 2679 | cg06614534 | cg03488422 | cg14615152 |
| 2680 | cg06616905 | cg03330678 | cg25053164 |
| 2681 | cg06617528 | cg03326699 | cg02710481 |
| 2682 | cg06621620 | cg03244438 | cg13817905 |
| 2683 | cg06622892 | cg02898721 | cg00732878 |
| 2684 | cg06628679 | cg02340818 | cg23910098 |
| 2685 | cg06632214 | cg02331025 | cg16778107 |
| 2686 | cg06632821 | cg02263260 | cg10457079 |
| 2687 | cg06633739 | cg02216206 | cg17898124 |
| 2688 | cg06641607 | cg02107173 | cg14313576 |
| 2689 | cg06642012 | cg01903305 | cg12925881 |
| 2690 | cg06646728 | cg01691710 | cg13475822 |
| 2691 | cg06647026 | cg01581360 | cg01997461 |
| 2692 | cg06649282 | cg01546047 | cg02069944 |
| 2693 | cg06650364 | cg01518755 | cg00143606 |
| 2694 | cg06656553 | cg01413698 | cg19604110 |
| 2695 | cg06659338 | cg01339351 | cg26837766 |
| 2696 | cg06660116 | cg01314034 | cg04100337 |
| 2697 | cg06665485 | cg01267373 | cg27378814 |
| 2698 | cg06671298 | cg01214847 | cg23115933 |
| 2699 | cg06673840 | cg01158079 | cg25424742 |
| 2700 | cg06675951 | cg00981877 | cg14671764 |

|      |            |            |            |
|------|------------|------------|------------|
| 2701 | cg06678137 | cg00887848 | cg09185884 |
| 2702 | cg06689039 | cg00869941 | cg25346117 |
| 2703 | cg06694381 | cg00710466 | cg14062119 |
| 2704 | cg06702537 | cg00699693 | cg05657292 |
| 2705 | cg06705004 | cg00594917 | cg21740826 |
| 2706 | cg06706550 | cg00523012 | cg10904856 |
| 2707 | cg06710741 | cg00409245 | cg12019990 |
| 2708 | cg06711298 | cg00352031 | cg25372085 |
| 2709 | cg06719042 | cg00232500 | cg03252568 |
| 2710 | cg06723357 | cg27612166 | cg23464284 |
| 2711 | cg06741399 | cg27611699 | cg00341297 |
| 2712 | cg06741896 | cg27578381 | cg22575379 |
| 2713 | cg06746318 | cg27566403 | cg04156383 |
| 2714 | cg06746774 | cg27532130 | cg04328729 |
| 2715 | cg06748078 | cg27234648 | cg06372475 |
| 2716 | cg06750802 | cg27207616 | cg15351186 |
| 2717 | cg06753050 | cg27202913 | cg00936935 |
| 2718 | cg06753827 | cg27073349 | cg00356131 |
| 2719 | cg06753918 | cg26977086 | cg00785482 |
| 2720 | cg06754496 | cg26818159 | cg10737521 |
| 2721 | cg06755413 | cg26740525 | cg11523661 |
| 2722 | cg06758191 | cg26660115 | cg08115297 |
| 2723 | cg06760467 | cg26637901 | cg18225577 |
| 2724 | cg06768437 | cg26120842 | cg06894011 |
| 2725 | cg06769510 | cg26097051 | cg09028383 |
| 2726 | cg06776976 | cg25707005 | cg03730709 |
| 2727 | cg06784563 | cg25644380 | cg23707719 |
| 2728 | cg06784602 | cg25271479 | cg05309505 |
| 2729 | cg06786153 | cg25116615 | cg02658272 |
| 2730 | cg06787104 | cg24940701 | cg17046776 |
| 2731 | cg06787609 | cg24940138 | cg05874233 |
| 2732 | cg06790069 | cg24897108 | cg13058457 |
| 2733 | cg06791695 | cg24896649 | cg18311516 |
| 2734 | cg06795827 | cg24750887 | cg09890339 |
| 2735 | cg06796435 | cg24657347 | cg20540306 |
| 2736 | cg06797069 | cg24630383 | cg05037360 |
| 2737 | cg06799533 | cg24544986 | cg27247807 |
| 2738 | cg06807837 | cg24474622 | cg17470627 |
| 2739 | cg06808089 | cg24100115 | cg01576275 |
| 2740 | cg06809295 | cg23850277 | cg11043092 |
| 2741 | cg06812836 | cg23812679 | cg19572849 |
| 2742 | cg06812840 | cg23397909 | cg07531248 |
| 2743 | cg06814256 | cg22990430 | cg23173517 |
| 2744 | cg06817454 | cg22885000 | cg24659758 |
| 2745 | cg06819431 | cg22780675 | cg23887746 |
| 2746 | cg06823034 | cg22743617 | cg02855558 |
| 2747 | cg06824199 | cg22039204 | cg13470673 |
| 2748 | cg06827256 | cg21500064 | cg20548182 |
| 2749 | cg06833798 | cg21442998 | cg19100996 |
| 2750 | cg06836544 | cg21235119 | cg07398661 |
| 2751 | cg06840243 | cg20800216 | cg09586198 |
| 2752 | cg06846976 | cg20784591 | cg19317433 |
| 2753 | cg06849167 | cg20459543 | cg13808641 |

|      |            |            |            |
|------|------------|------------|------------|
| 2754 | cg06851844 | cg20316440 | cg20069939 |
| 2755 | cg06853492 | cg20226512 | cg27514730 |
| 2756 | cg06856329 | cg20166714 | cg17470198 |
| 2757 | cg06856570 | cg20018563 | cg02627286 |
| 2758 | cg06857516 | cg19974227 | cg23691781 |
| 2759 | cg06861572 | cg19892287 | cg17285883 |
| 2760 | cg06862949 | cg19874640 | cg13385220 |
| 2761 | cg06863830 | cg19603100 | cg04473654 |
| 2762 | cg06864351 | cg19303748 | cg09932436 |
| 2763 | cg06868569 | cg18696900 | cg05229528 |
| 2764 | cg06869755 | cg18436810 | cg21370924 |
| 2765 | cg06870740 | cg18384190 | cg11777290 |
| 2766 | cg06880930 | cg18304186 | cg12614090 |
| 2767 | cg06881421 | cg18149689 | cg17450505 |
| 2768 | cg06889272 | cg18120975 | cg21089789 |
| 2769 | cg06892815 | cg18108716 | cg08701675 |
| 2770 | cg06892907 | cg17796593 | cg05536457 |
| 2771 | cg06894011 | cg17791936 | cg02928110 |
| 2772 | cg06895946 | cg17550566 | cg00489394 |
| 2773 | cg06898502 | cg17537493 | cg14044465 |
| 2774 | cg06899970 | cg17431079 | cg07067993 |
| 2775 | cg06900571 | cg17307791 | cg11176525 |
| 2776 | cg06900843 | cg17304712 | cg16263152 |
| 2777 | cg06907347 | cg16995299 | cg20459543 |
| 2778 | cg06914693 | cg16711011 | cg10925829 |
| 2779 | cg06916574 | cg16704889 | cg11482422 |
| 2780 | cg06918474 | cg16660312 | cg12552626 |
| 2781 | cg06919312 | cg16572224 | cg09259595 |
| 2782 | cg06919693 | cg16514214 | cg01770296 |
| 2783 | cg06921552 | cg16407998 | cg21903817 |
| 2784 | cg06924233 | cg16265707 | cg23460369 |
| 2785 | cg06926306 | cg16114651 | cg11977716 |
| 2786 | cg06927337 | cg16031980 | cg18854004 |
| 2787 | cg06931444 | cg16027775 | cg15464763 |
| 2788 | cg06937201 | cg15770585 | cg05832823 |
| 2789 | cg06937205 | cg15576082 | cg09175915 |
| 2790 | cg06937357 | cg15402232 | cg23610994 |
| 2791 | cg06938890 | cg15354065 | cg10126181 |
| 2792 | cg06943385 | cg15121417 | cg05698228 |
| 2793 | cg06943835 | cg15028232 | cg26965897 |
| 2794 | cg06947205 | cg14916108 | cg02078525 |
| 2795 | cg06967316 | cg14870682 | cg18048309 |
| 2796 | cg06967828 | cg14657458 | cg06642012 |
| 2797 | cg06969777 | cg14524553 | cg16516980 |
| 2798 | cg06981182 | cg14393609 | cg09320595 |
| 2799 | cg06984255 | cg13927454 | cg17329004 |
| 2800 | cg06987369 | cg13642149 | cg24875593 |
| 2801 | cg06989253 | cg13618372 | cg09006487 |
| 2802 | cg06989443 | cg13522118 | cg08524717 |
| 2803 | cg06995299 | cg13483248 | cg27346937 |
| 2804 | cg06996029 | cg13422164 | cg04249605 |
| 2805 | cg06996896 | cg13216372 | cg26574247 |
| 2806 | cg07005960 | cg13207250 | cg15264991 |

|      |            |            |            |
|------|------------|------------|------------|
| 2807 | cg07008193 | cg13071729 | cg09520904 |
| 2808 | cg07012484 | cg12692386 | cg24738592 |
| 2809 | cg07012725 | cg12616177 | cg25520910 |
| 2810 | cg07014438 | cg12367789 | cg16823064 |
| 2811 | cg07015803 | cg12109728 | cg00469547 |
| 2812 | cg07016298 | cg12019990 | cg23834919 |
| 2813 | cg07020987 | cg11998932 | cg11535638 |
| 2814 | cg07021447 | cg11864076 | cg25714956 |
| 2815 | cg07022478 | cg11822372 | cg02613295 |
| 2816 | cg07025242 | cg11818853 | cg14125542 |
| 2817 | cg07026910 | cg10876003 | cg21546950 |
| 2818 | cg07034004 | cg10859358 | cg20822767 |
| 2819 | cg07036799 | cg10759972 | cg19584674 |
| 2820 | cg07038822 | cg10434728 | cg27302539 |
| 2821 | cg07041214 | cg10404601 | cg16034562 |
| 2822 | cg07041720 | cg10095226 | cg22286382 |
| 2823 | cg07041883 | cg09897737 | cg23393892 |
| 2824 | cg07043952 | cg09702334 | cg27635271 |
| 2825 | cg07044414 | cg09647352 | cg07214314 |
| 2826 | cg07044523 | cg09256716 | cg17049328 |
| 2827 | cg07046047 | cg09238162 | cg12786452 |
| 2828 | cg07048516 | cg09175915 | cg06723357 |
| 2829 | cg07048592 | cg09171093 | cg02742533 |
| 2830 | cg07050599 | cg09036558 | cg24215159 |
| 2831 | cg07050611 | cg09028132 | cg19055390 |
| 2832 | cg07051221 | cg08978399 | cg27503499 |
| 2833 | cg07054804 | cg08973281 | cg05400196 |
| 2834 | cg07057687 | cg08892499 | cg08004045 |
| 2835 | cg07058109 | cg08864083 | cg22186291 |
| 2836 | cg07061582 | cg08739576 | cg06784563 |
| 2837 | cg07064592 | cg08607612 | cg10626305 |
| 2838 | cg07067280 | cg08577953 | cg12109728 |
| 2839 | cg07067993 | cg08407014 | cg22932649 |
| 2840 | cg07068045 | cg08282578 | cg27026202 |
| 2841 | cg07070824 | cg08134301 | cg07377299 |
| 2842 | cg07071036 | cg07997682 | cg16274890 |
| 2843 | cg07071809 | cg07925615 | cg13050716 |
| 2844 | cg07077978 | cg07588779 | cg04678901 |
| 2845 | cg07078758 | cg07581623 | cg10378795 |
| 2846 | cg07079828 | cg07447845 | cg17181336 |
| 2847 | cg07083272 | cg07347148 | cg07520608 |
| 2848 | cg07085590 | cg07041214 | cg17095737 |
| 2849 | cg07086112 | cg07038689 | cg20679011 |
| 2850 | cg07088950 | cg06892907 | cg12764441 |
| 2851 | cg07090980 | cg06892815 | cg12474695 |
| 2852 | cg07091062 | cg06873590 | cg24523322 |
| 2853 | cg07094487 | cg06812840 | cg04847386 |
| 2854 | cg07094993 | cg06812836 | cg26942121 |
| 2855 | cg07095945 | cg06647026 | cg00982952 |
| 2856 | cg07097367 | cg06492744 | cg04685228 |
| 2857 | cg07097374 | cg06378490 | cg04800347 |
| 2858 | cg07102397 | cg06309980 | cg09152259 |
| 2859 | cg07102406 | cg06208158 | cg03287929 |

|      |            |            |            |
|------|------------|------------|------------|
| 2860 | cg07103201 | cg06070445 | cg24163668 |
| 2861 | cg07104086 | cg05976516 | cg23990942 |
| 2862 | cg07108443 | cg05865548 | cg01824284 |
| 2863 | cg07109453 | cg05826596 | cg22986999 |
| 2864 | cg07109788 | cg05730150 | cg14359798 |
| 2865 | cg07116732 | cg05536457 | cg20840795 |
| 2866 | cg07122529 | cg05434397 | cg09970023 |
| 2867 | cg07123022 | cg05283542 | cg20195046 |
| 2868 | cg07125976 | cg05251593 | cg20382493 |
| 2869 | cg07127410 | cg05037360 | cg20927312 |
| 2870 | cg07129714 | cg04883903 | cg16803044 |
| 2871 | cg07129769 | cg04847386 | cg03439687 |
| 2872 | cg07133097 | cg04774930 | cg10810290 |
| 2873 | cg07139329 | cg04724190 | cg00401972 |
| 2874 | cg07146723 | cg04687939 | cg13149996 |
| 2875 | cg07148207 | cg04375492 | cg24881255 |
| 2876 | cg07152894 | cg04304033 | cg26005197 |
| 2877 | cg07155331 | cg04015687 | cg17431079 |
| 2878 | cg07156484 | cg03988952 | cg12367789 |
| 2879 | cg07160118 | cg03669590 | cg24873093 |
| 2880 | cg07162085 | cg03661844 | cg09745791 |
| 2881 | cg07165066 | cg03627931 | cg07057687 |
| 2882 | cg07166333 | cg03596635 | cg16326073 |
| 2883 | cg07171780 | cg03575245 | cg00017461 |
| 2884 | cg07178379 | cg03417342 | cg07283582 |
| 2885 | cg07181257 | cg03379631 | cg13393917 |
| 2886 | cg07192047 | cg03197830 | cg03389789 |
| 2887 | cg07192772 | cg03098159 | cg23998645 |
| 2888 | cg07197326 | cg03049691 | cg05846633 |
| 2889 | cg07204803 | cg02938429 | cg25232510 |
| 2890 | cg07206497 | cg02725620 | cg19007948 |
| 2891 | cg07206676 | cg02451516 | cg24123198 |
| 2892 | cg07207742 | cg02399019 | cg01604946 |
| 2893 | cg07217341 | cg02325128 | cg25403283 |
| 2894 | cg07221518 | cg02131465 | cg18375421 |
| 2895 | cg07230078 | cg02068351 | cg27213925 |
| 2896 | cg07236781 | cg01859228 | cg09911316 |
| 2897 | cg07236812 | cg01818539 | cg09124230 |
| 2898 | cg07241090 | cg01789743 | cg09790523 |
| 2899 | cg07260789 | cg01705036 | cg12528056 |
| 2900 | cg07261940 | cg01656717 | cg26919387 |
| 2901 | cg07265549 | cg01580176 | cg02153814 |
| 2902 | cg07266910 | cg01442620 | cg08831077 |
| 2903 | cg07267984 | cg01357897 | cg16499416 |
| 2904 | cg07268431 | cg01256365 | cg18772205 |
| 2905 | cg07270259 | cg01000937 | cg12450391 |
| 2906 | cg07275305 | cg00994389 | cg03419014 |
| 2907 | cg07279281 | cg00927364 | cg07835443 |
| 2908 | cg07283859 | cg00872170 | cg23827284 |
| 2909 | cg07284476 | cg00808555 | cg08097657 |
| 2910 | cg07284519 | cg00760872 | cg12650685 |
| 2911 | cg07285148 | cg00757822 | cg02926266 |
| 2912 | cg07290269 | cg00590590 | cg06204229 |

|      |            |            |            |
|------|------------|------------|------------|
| 2913 | cg07290652 | cg00184279 | cg16234490 |
| 2914 | cg07294624 | cg27522078 | cg12491594 |
| 2915 | cg07295918 | cg27349909 | cg19951269 |
| 2916 | cg07296854 | cg27306243 | cg18989491 |
| 2917 | cg07306006 | cg27239280 | cg19238415 |
| 2918 | cg07308243 | cg27073066 | cg09494646 |
| 2919 | cg07309864 | cg27065717 | cg00386725 |
| 2920 | cg07310500 | cg26937267 | cg11351841 |
| 2921 | cg07324116 | cg26837766 | cg06809295 |
| 2922 | cg07333510 | cg26767198 | cg26441230 |
| 2923 | cg07336123 | cg26744332 | cg16863382 |
| 2924 | cg07336964 | cg26645242 | cg07608094 |
| 2925 | cg07337025 | cg26526953 | cg17797898 |
| 2926 | cg07338476 | cg26516446 | cg08151983 |
| 2927 | cg07344990 | cg26467269 | cg18327762 |
| 2928 | cg07346310 | cg26410484 | cg11391732 |
| 2929 | cg07347148 | cg26332285 | cg09829263 |
| 2930 | cg07352757 | cg26231761 | cg27089352 |
| 2931 | cg07353266 | cg26177041 | cg00245896 |
| 2932 | cg07363131 | cg26156321 | cg26514080 |
| 2933 | cg07365071 | cg26132163 | cg04011474 |
| 2934 | cg07368061 | cg25952596 | cg21569714 |
| 2935 | cg07374490 | cg25831522 | cg17683336 |
| 2936 | cg07379550 | cg25801976 | cg02244933 |
| 2937 | cg07384019 | cg25677394 | cg04623131 |
| 2938 | cg07385220 | cg25588389 | cg15889057 |
| 2939 | cg07391023 | cg25586305 | cg03666300 |
| 2940 | cg07394799 | cg25582924 | cg04945557 |
| 2941 | cg07396047 | cg25390635 | cg08787401 |
| 2942 | cg07410597 | cg25281849 | cg19765175 |
| 2943 | cg07412315 | cg25115276 | cg16776981 |
| 2944 | cg07416344 | cg25086418 | cg18847089 |
| 2945 | cg07420867 | cg24926121 | cg02621481 |
| 2946 | cg07425568 | cg24918798 | cg02473287 |
| 2947 | cg07425646 | cg24738346 | cg16139912 |
| 2948 | cg07431229 | cg24659758 | cg00380428 |
| 2949 | cg07433905 | cg24589334 | cg03899510 |
| 2950 | cg07447742 | cg24275626 | cg19747992 |
| 2951 | cg07447845 | cg24148817 | cg14468090 |
| 2952 | cg07449447 | cg23936766 | cg05201312 |
| 2953 | cg07456413 | cg23900422 | cg13637552 |
| 2954 | cg07464578 | cg23756143 | cg11894474 |
| 2955 | cg07467854 | cg23712594 | cg10273072 |
| 2956 | cg07468956 | cg23620047 | cg14005246 |
| 2957 | cg07471052 | cg23538755 | cg14514032 |
| 2958 | cg07475178 | cg23530850 | cg23547892 |
| 2959 | cg07477924 | cg23468002 | cg06881421 |
| 2960 | cg07478111 | cg23166740 | cg05065603 |
| 2961 | cg07478501 | cg23010693 | cg23024810 |
| 2962 | cg07481273 | cg22699768 | cg20284937 |
| 2963 | cg07483007 | cg22558061 | cg23032993 |
| 2964 | cg07483266 | cg22542420 | cg16084313 |
| 2965 | cg07486170 | cg22255690 | cg24998879 |



|      |            |            |            |
|------|------------|------------|------------|
| 2966 | cg07487572 | cg22154992 | cg06143290 |
| 2967 | cg07495357 | cg22013790 | cg19137748 |
| 2968 | cg07503211 | cg21947590 | cg26995244 |
| 2969 | cg07505515 | cg21573345 | cg13798679 |
| 2970 | cg07505901 | cg21528927 | cg08407014 |
| 2971 | cg07506407 | cg21335012 | cg02102075 |
| 2972 | cg07508304 | cg21332304 | cg10213353 |
| 2973 | cg07511723 | cg21304766 | cg10361005 |
| 2974 | cg07529658 | cg21165519 | cg11025750 |
| 2975 | cg07531248 | cg20925383 | cg00299943 |
| 2976 | cg07536018 | cg20703928 | cg16880392 |
| 2977 | cg07545858 | cg20663495 | cg24926689 |
| 2978 | cg07547336 | cg20515846 | cg00335361 |
| 2979 | cg07549381 | cg20505457 | cg03446062 |
| 2980 | cg07549715 | cg20441046 | cg08059361 |
| 2981 | cg07552087 | cg20329303 | cg20197756 |
| 2982 | cg07552868 | cg20254251 | cg10811485 |
| 2983 | cg07555102 | cg19995891 | cg03049691 |
| 2984 | cg07560287 | cg19841423 | cg11971852 |
| 2985 | cg07561547 | cg19593878 | cg06489615 |
| 2986 | cg07565042 | cg19548524 | cg14414154 |
| 2987 | cg07571745 | cg19262818 | cg03514843 |
| 2988 | cg07572251 | cg19244380 | cg24973993 |
| 2989 | cg07574267 | cg19178876 | cg00968638 |
| 2990 | cg07574854 | cg19130973 | cg02727423 |
| 2991 | cg07577837 | cg19084508 | cg05205532 |
| 2992 | cg07577934 | cg19083914 | cg25932290 |
| 2993 | cg07581623 | cg18978531 | cg19293468 |
| 2994 | cg07582655 | cg18931850 | cg12379145 |
| 2995 | cg07584734 | cg18878210 | cg04366815 |
| 2996 | cg07585257 | cg18732855 | cg09140274 |
| 2997 | cg07586345 | cg18657988 | cg24670927 |
| 2998 | cg07588779 | cg18440069 | cg09623085 |
| 2999 | cg07605062 | cg18047920 | cg18371976 |
| 3000 | cg07608094 | cg17980999 | cg08650647 |
| 3001 | cg07612468 | cg17799760 | cg22979083 |
| 3002 | cg07613391 | cg17775332 | cg09184899 |
| 3003 | cg07617152 | cg17695841 | cg01403055 |
| 3004 | cg07620571 | cg17454920 | cg06937357 |
| 3005 | cg07624888 | cg17319795 | cg20567148 |
| 3006 | cg07630327 | cg17285177 | cg01819707 |
| 3007 | cg07638689 | cg17113147 | cg02552250 |
| 3008 | cg07642499 | cg17056676 | cg15959921 |
| 3009 | cg07661899 | cg16829042 | cg17206596 |
| 3010 | cg07662964 | cg16797656 | cg05360477 |
| 3011 | cg07665060 | cg16706038 | cg25373624 |
| 3012 | cg07673230 | cg16608596 | cg02255721 |
| 3013 | cg07674095 | cg16523645 | cg02462416 |
| 3014 | cg07685601 | cg16511831 | cg03540589 |
| 3015 | cg07691004 | cg16421359 | cg10798745 |
| 3016 | cg07691914 | cg16222790 | cg10425513 |
| 3017 | cg07701911 | cg16158296 | cg13637654 |
| 3018 | cg07706695 | cg16089233 | cg00204976 |

|      |            |            |            |
|------|------------|------------|------------|
| 3019 | cg07713495 | cg15934607 | cg10301695 |
| 3020 | cg07714708 | cg15843262 | cg09537448 |
| 3021 | cg07716287 | cg15726557 | cg26041493 |
| 3022 | cg07716847 | cg15408497 | cg00582671 |
| 3023 | cg07720334 | cg15164881 | cg15034300 |
| 3024 | cg07731639 | cg15141238 | cg07184807 |
| 3025 | cg07732097 | cg15016481 | cg10692363 |
| 3026 | cg07733800 | cg14937228 | cg20591120 |
| 3027 | cg07733851 | cg14715030 | cg07642499 |
| 3028 | cg07736115 | cg14701122 | cg27573308 |
| 3029 | cg07740306 | cg14553765 | cg11139446 |
| 3030 | cg07741192 | cg14428166 | cg09926389 |
| 3031 | cg07743919 | cg14362630 | cg00550040 |
| 3032 | cg07746532 | cg14201387 | cg06984255 |
| 3033 | cg07748741 | cg14143441 | cg23811289 |
| 3034 | cg07749442 | cg14129169 | cg10464467 |
| 3035 | cg07754347 | cg14081465 | cg16031980 |
| 3036 | cg07763497 | cg14065153 | cg26361671 |
| 3037 | cg07770222 | cg13991631 | cg27040468 |
| 3038 | cg07793033 | cg13920768 | cg11951169 |
| 3039 | cg07795346 | cg13852730 | cg08843064 |
| 3040 | cg07795968 | cg13842262 | cg07099056 |
| 3041 | cg07800359 | cg13543915 | cg05415936 |
| 3042 | cg07802350 | cg13495850 | cg02930033 |
| 3043 | cg07802362 | cg13461247 | cg04003615 |
| 3044 | cg07803375 | cg13455439 | cg07665060 |
| 3045 | cg07804434 | cg13169796 | cg15532942 |
| 3046 | cg07805999 | cg13148921 | cg14334310 |
| 3047 | cg07810967 | cg12921473 | cg10607485 |
| 3048 | cg07811634 | cg12764441 | cg04384031 |
| 3049 | cg07813622 | cg12710648 | cg06159340 |
| 3050 | cg07818978 | cg12220376 | cg27110054 |
| 3051 | cg07826642 | cg12185975 | cg01296758 |
| 3052 | cg07828612 | cg12141218 | cg15970457 |
| 3053 | cg07832950 | cg12017558 | cg21450547 |
| 3054 | cg07833472 | cg11971852 | cg04674497 |
| 3055 | cg07834408 | cg11897120 | cg17333042 |
| 3056 | cg07835154 | cg11781564 | cg21973907 |
| 3057 | cg07835443 | cg11731626 | cg04777612 |
| 3058 | cg07836226 | cg11469540 | cg04689023 |
| 3059 | cg07841877 | cg11197908 | cg14058027 |
| 3060 | cg07844828 | cg10980495 | cg14692854 |
| 3061 | cg07849237 | cg10774480 | cg13278105 |
| 3062 | cg07850832 | cg10726559 | cg23217547 |
| 3063 | cg07858195 | cg10654373 | cg03727333 |
| 3064 | cg07862575 | cg10555744 | cg12734386 |
| 3065 | cg07866001 | cg10492836 | cg19400179 |
| 3066 | cg07867517 | cg10332704 | cg02573234 |
| 3067 | cg07874353 | cg10298992 | cg00137696 |
| 3068 | cg07876450 | cg10294836 | cg17724627 |
| 3069 | cg07880135 | cg10288921 | cg13710553 |
| 3070 | cg07888884 | cg10021749 | cg23181573 |
| 3071 | cg07894983 | cg10005273 | cg11327857 |

|      |            |            |            |
|------|------------|------------|------------|
| 3072 | cg07899389 | cg09687417 | cg10146514 |
| 3073 | cg07900344 | cg09580592 | cg25736617 |
| 3074 | cg07904865 | cg09555736 | cg25582924 |
| 3075 | cg07910945 | cg09541576 | cg07309864 |
| 3076 | cg07912144 | cg09500421 | cg16159491 |
| 3077 | cg07921503 | cg09385972 | cg06907347 |
| 3078 | cg07925615 | cg09370702 | cg16391182 |
| 3079 | cg07927540 | cg09335712 | cg17454920 |
| 3080 | cg07929112 | cg09086087 | cg16221927 |
| 3081 | cg07937803 | cg09063434 | cg13148921 |
| 3082 | cg07938459 | cg09035930 | cg18181891 |
| 3083 | cg07941953 | cg09028383 | cg14428166 |
| 3084 | cg07946977 | cg08954277 | cg24629431 |
| 3085 | cg07951978 | cg08883485 | cg25940447 |
| 3086 | cg07959741 | cg08818094 | cg08823837 |
| 3087 | cg07962882 | cg08774694 | cg09499482 |
| 3088 | cg07964527 | cg08613144 | cg14920846 |
| 3089 | cg07965110 | cg08611376 | cg22222413 |
| 3090 | cg07965566 | cg08437576 | cg25629077 |
| 3091 | cg07969918 | cg08412215 | cg13029400 |
| 3092 | cg07976390 | cg08276755 | cg10255535 |
| 3093 | cg07986222 | cg08242475 | cg00262446 |
| 3094 | cg07990198 | cg08098420 | cg07447845 |
| 3095 | cg07990658 | cg08037719 | cg19372504 |
| 3096 | cg07992340 | cg07969918 | cg18760055 |
| 3097 | cg08003887 | cg07862575 | cg15633699 |
| 3098 | cg08004045 | cg07802362 | cg05898188 |
| 3099 | cg08005460 | cg07748741 | cg16892393 |
| 3100 | cg08033285 | cg07665929 | cg12939390 |
| 3101 | cg08037719 | cg07620571 | cg02832357 |
| 3102 | cg08039592 | cg07584734 | cg15174926 |
| 3103 | cg08043592 | cg07131274 | cg19937288 |
| 3104 | cg08044294 | cg07122529 | cg12178980 |
| 3105 | cg08059361 | cg07027613 | cg23514135 |
| 3106 | cg08061755 | cg07010552 | cg09534489 |
| 3107 | cg08062713 | cg06749819 | cg07463059 |
| 3108 | cg08065374 | cg06673840 | cg06813419 |
| 3109 | cg08067991 | cg06641607 | cg04843968 |
| 3110 | cg08070235 | cg06532257 | cg23726802 |
| 3111 | cg08073527 | cg06390613 | cg02055483 |
| 3112 | cg08088222 | cg06254425 | cg16770054 |
| 3113 | cg08089518 | cg06219670 | cg17893426 |
| 3114 | cg08091050 | cg06123891 | cg12832282 |
| 3115 | cg08091706 | cg06028151 | cg24129923 |
| 3116 | cg08094614 | cg05816041 | cg05150641 |
| 3117 | cg08097359 | cg05750323 | cg10589745 |
| 3118 | cg08098420 | cg05657292 | cg16616765 |
| 3119 | cg08101977 | cg05602356 | cg12419932 |
| 3120 | cg08103691 | cg05516020 | cg03591954 |
| 3121 | cg08104146 | cg05494073 | cg19944656 |
| 3122 | cg08104310 | cg05235248 | cg19220272 |
| 3123 | cg08105005 | cg05056653 | cg27133959 |
| 3124 | cg08106635 | cg05041061 | cg22532155 |

|      |            |            |            |
|------|------------|------------|------------|
| 3125 | cg08108655 | cg04995521 | cg05272587 |
| 3126 | cg08110688 | cg04967410 | cg02976723 |
| 3127 | cg08112616 | cg04967009 | cg18761894 |
| 3128 | cg08113187 | cg04872027 | cg21168101 |
| 3129 | cg08115297 | cg04839616 | cg22376204 |
| 3130 | cg08115732 | cg04706201 | cg14059835 |
| 3131 | cg08119777 | cg04655520 | cg24030630 |
| 3132 | cg08132025 | cg04558973 | cg05575733 |
| 3133 | cg08132525 | cg04394390 | cg26097051 |
| 3134 | cg08132573 | cg04261952 | cg24097814 |
| 3135 | cg08134301 | cg04135242 | cg09142595 |
| 3136 | cg08135904 | cg04100337 | cg26164879 |
| 3137 | cg08137602 | cg03956820 | cg20952105 |
| 3138 | cg08141395 | cg03769734 | cg02622601 |
| 3139 | cg08143701 | cg03731348 | cg20051177 |
| 3140 | cg08148618 | cg03501128 | cg13728131 |
| 3141 | cg08149747 | cg03431524 | cg10965996 |
| 3142 | cg08151983 | cg03407184 | cg18829162 |
| 3143 | cg08157446 | cg03333776 | cg00257455 |
| 3144 | cg08168529 | cg03260744 | cg14706807 |
| 3145 | cg08169341 | cg03036214 | cg12595697 |
| 3146 | cg08173709 | cg02936315 | cg16766325 |
| 3147 | cg08173959 | cg02807008 | cg01259126 |
| 3148 | cg08180831 | cg02696830 | cg23386779 |
| 3149 | cg08183125 | cg02665399 | cg09330834 |
| 3150 | cg08185095 | cg02654449 | cg19931529 |
| 3151 | cg08193650 | cg02435083 | cg12395479 |
| 3152 | cg08197880 | cg02240030 | cg12817352 |
| 3153 | cg08198711 | cg02058267 | cg10810026 |
| 3154 | cg08206098 | cg02040734 | cg08251036 |
| 3155 | cg08206156 | cg01930756 | cg08509383 |
| 3156 | cg08206881 | cg01770296 | cg13953458 |
| 3157 | cg08208595 | cg01589629 | cg06890747 |
| 3158 | cg08209934 | cg01493020 | cg04394390 |
| 3159 | cg08215532 | cg01462184 | cg12948543 |
| 3160 | cg08218971 | cg01456989 | cg10513161 |
| 3161 | cg08236537 | cg01415527 | cg19244553 |
| 3162 | cg08242475 | cg01260820 | cg01512113 |
| 3163 | cg08248600 | cg00991659 | cg27526774 |
| 3164 | cg08250738 | cg00961416 | cg02886591 |
| 3165 | cg08251036 | cg00950038 | cg05334190 |
| 3166 | cg08258506 | cg00676360 | cg23674358 |
| 3167 | cg08258867 | cg00484122 | cg19605931 |
| 3168 | cg08259083 | cg00444740 | cg09780231 |
| 3169 | cg08261841 | cg00428526 | cg01794926 |
| 3170 | cg08264519 | cg00210271 | cg20519665 |
| 3171 | cg08276755 | cg00043005 | cg18929814 |
| 3172 | cg08276889 | cg27588653 | cg27655716 |
| 3173 | cg08277216 | cg27560818 | cg25600823 |
| 3174 | cg08281590 | cg27441486 | cg14104252 |
| 3175 | cg08282578 | cg27143703 | cg15600176 |
| 3176 | cg08288016 | cg27105598 | cg13583088 |
| 3177 | cg08291302 | cg27020028 | cg03385114 |

|      |            |            |            |
|------|------------|------------|------------|
| 3178 | cg08293075 | cg26835798 | cg03367519 |
| 3179 | cg08293102 | cg26810214 | cg11108115 |
| 3180 | cg08293536 | cg26614264 | cg23348723 |
| 3181 | cg08304608 | cg26605683 | cg19714865 |
| 3182 | cg08307171 | cg26381919 | cg15726557 |
| 3183 | cg08313842 | cg26365854 | cg22809726 |
| 3184 | cg08329113 | cg26365254 | cg05917480 |
| 3185 | cg08331427 | cg26053832 | cg06706550 |
| 3186 | cg08334780 | cg25866889 | cg11225330 |
| 3187 | cg08342966 | cg25684961 | cg14650228 |
| 3188 | cg08345465 | cg25552843 | cg04921335 |
| 3189 | cg08351131 | cg25484139 | cg09358422 |
| 3190 | cg08351911 | cg25442652 | cg20208009 |
| 3191 | cg08362308 | cg25235326 | cg24247537 |
| 3192 | cg08365638 | cg25136955 | cg04262465 |
| 3193 | cg08365802 | cg25028855 | cg12549211 |
| 3194 | cg08369014 | cg24648594 | cg16421653 |
| 3195 | cg08378932 | cg24499677 | cg01290421 |
| 3196 | cg08381596 | cg24426483 | cg02605292 |
| 3197 | cg08397968 | cg24342377 | cg21727276 |
| 3198 | cg08400424 | cg24249775 | cg01359676 |
| 3199 | cg08407014 | cg24136288 | cg12251803 |
| 3200 | cg08409074 | cg23921860 | cg01274233 |
| 3201 | cg08411881 | cg23812660 | cg03815917 |
| 3202 | cg08412215 | cg23674358 | cg16514214 |
| 3203 | cg08418375 | cg23484234 | cg16328007 |
| 3204 | cg08419373 | cg23385847 | cg08215532 |
| 3205 | cg08426200 | cg23250528 | cg25153629 |
| 3206 | cg08428985 | cg23133355 | cg25441338 |
| 3207 | cg08433725 | cg23093846 | cg02581587 |
| 3208 | cg08436467 | cg23019935 | cg24969902 |
| 3209 | cg08437576 | cg22904096 | cg16700555 |
| 3210 | cg08437802 | cg22619784 | cg05452391 |
| 3211 | cg08441269 | cg22315164 | cg10363202 |
| 3212 | cg08450122 | cg22186291 | cg25557739 |
| 3213 | cg08457169 | cg22180848 | cg11476985 |
| 3214 | cg08458912 | cg21789440 | cg11530995 |
| 3215 | cg08463581 | cg21642054 | cg04095995 |
| 3216 | cg08463775 | cg21637392 | cg07010552 |
| 3217 | cg08469834 | cg21464492 | cg08329113 |
| 3218 | cg08480739 | cg21404476 | cg08705647 |
| 3219 | cg08489478 | cg20840795 | cg17009731 |
| 3220 | cg08494755 | cg20781516 | cg18191688 |
| 3221 | cg08506026 | cg20699157 | cg25953130 |
| 3222 | cg08507725 | cg20662658 | cg12865675 |
| 3223 | cg08509383 | cg20595846 | cg18172013 |
| 3224 | cg08510718 | cg20461270 | cg25613180 |
| 3225 | cg08521178 | cg20061812 | cg18487916 |
| 3226 | cg08523978 | cg20000866 | cg23029159 |
| 3227 | cg08524717 | cg19995595 | cg24902250 |
| 3228 | cg08527124 | cg19774846 | cg08288016 |
| 3229 | cg08535779 | cg19730379 | cg14095720 |
| 3230 | cg08537794 | cg19582744 | cg19138499 |

|      |            |            |            |
|------|------------|------------|------------|
| 3231 | cg08544606 | cg19541247 | cg15598425 |
| 3232 | cg08545132 | cg19502812 | cg03613003 |
| 3233 | cg08550729 | cg19253339 | cg15963326 |
| 3234 | cg08552167 | cg19190016 | cg15408640 |
| 3235 | cg08552290 | cg19162768 | cg16550656 |
| 3236 | cg08552446 | cg19120897 | cg15545942 |
| 3237 | cg08553857 | cg18905668 | cg01559356 |
| 3238 | cg08559648 | cg18854872 | cg07070824 |
| 3239 | cg08565675 | cg18729298 | cg23812679 |
| 3240 | cg08566548 | cg18704218 | cg07041214 |
| 3241 | cg08571020 | cg18628371 | cg02471028 |
| 3242 | cg08572315 | cg18467406 | cg21205855 |
| 3243 | cg08576185 | cg18259487 | cg14960869 |
| 3244 | cg08577953 | cg18259342 | cg10617494 |
| 3245 | cg08590257 | cg18259003 | cg05289897 |
| 3246 | cg08591538 | cg18163092 | cg04517274 |
| 3247 | cg08603083 | cg18148375 | cg15089806 |
| 3248 | cg08604505 | cg17796043 | cg01246855 |
| 3249 | cg08605347 | cg17747635 | cg13794839 |
| 3250 | cg08605965 | cg17703629 | cg03401464 |
| 3251 | cg08606951 | cg17692230 | cg24706981 |
| 3252 | cg08607612 | cg17534540 | cg02538557 |
| 3253 | cg08611376 | cg17400113 | cg16168321 |
| 3254 | cg08613794 | cg17340779 | cg26668713 |
| 3255 | cg08616182 | cg17221941 | cg07910945 |
| 3256 | cg08616663 | cg17213154 | cg05865548 |
| 3257 | cg08619515 | cg17199010 | cg06530983 |
| 3258 | cg08622923 | cg16897462 | cg24301288 |
| 3259 | cg08625990 | cg16695570 | cg14601444 |
| 3260 | cg08628233 | cg16516980 | cg07638689 |
| 3261 | cg08631328 | cg16436210 | cg13444374 |
| 3262 | cg08636203 | cg16309127 | cg06456125 |
| 3263 | cg08644106 | cg16144562 | cg06995299 |
| 3264 | cg08650647 | cg15888569 | cg14202146 |
| 3265 | cg08665249 | cg15850851 | cg13400018 |
| 3266 | cg08677140 | cg15806038 | cg03934478 |
| 3267 | cg08681293 | cg15678662 | cg23679798 |
| 3268 | cg08682625 | cg15627593 | cg07585257 |
| 3269 | cg08687995 | cg15487498 | cg01959238 |
| 3270 | cg08688659 | cg15450139 | cg10082525 |
| 3271 | cg08692006 | cg15260437 | cg00927364 |
| 3272 | cg08692104 | cg15031106 | cg00757822 |
| 3273 | cg08694923 | cg14462432 | cg21225667 |
| 3274 | cg08701134 | cg14156441 | cg05493407 |
| 3275 | cg08701675 | cg14114546 | cg25785495 |
| 3276 | cg08703151 | cg14064268 | cg07090980 |
| 3277 | cg08712631 | cg14016236 | cg09807875 |
| 3278 | cg08719095 | cg13908988 | cg25413575 |
| 3279 | cg08726900 | cg13800349 | cg21698310 |
| 3280 | cg08732879 | cg13750566 | cg03889044 |
| 3281 | cg08733553 | cg13736131 | cg03608003 |
| 3282 | cg08737189 | cg13734106 | cg06237774 |
| 3283 | cg08739576 | cg13731108 | cg24617568 |

|      |            |            |            |
|------|------------|------------|------------|
| 3284 | cg08740008 | cg13726456 | cg16496462 |
| 3285 | cg08740088 | cg13661703 | cg05260236 |
| 3286 | cg08741843 | cg13611006 | cg00201819 |
| 3287 | cg08749599 | cg13549638 | cg03824114 |
| 3288 | cg08750440 | cg13473184 | cg09214456 |
| 3289 | cg08764162 | cg13383819 | cg11852646 |
| 3290 | cg08767627 | cg13236409 | cg03938110 |
| 3291 | cg08768904 | cg13093023 | cg02926747 |
| 3292 | cg08771923 | cg13035910 | cg01953240 |
| 3293 | cg08775774 | cg12982283 | cg16861209 |
| 3294 | cg08775793 | cg12887832 | cg14070108 |
| 3295 | cg08777316 | cg12640387 | cg12195230 |
| 3296 | cg08779777 | cg12499572 | cg03812676 |
| 3297 | cg08782674 | cg12240761 | cg22304399 |
| 3298 | cg08784950 | cg12240637 | cg06937205 |
| 3299 | cg08787401 | cg12231088 | cg02304580 |
| 3300 | cg08805497 | cg12112434 | cg22890896 |
| 3301 | cg08812108 | cg11995490 | cg08250738 |
| 3302 | cg08812784 | cg11894474 | cg25573640 |
| 3303 | cg08814268 | cg11802013 | cg26053832 |
| 3304 | cg08818094 | cg11748187 | cg04375492 |
| 3305 | cg08823837 | cg11620716 | cg10077985 |
| 3306 | cg08823975 | cg11198094 | cg25594550 |
| 3307 | cg08824291 | cg11084269 | cg14939096 |
| 3308 | cg08825895 | cg10734581 | cg02862467 |
| 3309 | cg08826080 | cg10721220 | cg12403778 |
| 3310 | cg08829140 | cg10607603 | cg02348449 |
| 3311 | cg08831077 | cg10571824 | cg21247923 |
| 3312 | cg08831531 | cg10513161 | cg00244391 |
| 3313 | cg08833741 | cg10494703 | cg06255601 |
| 3314 | cg08836353 | cg10354880 | cg11553311 |
| 3315 | cg08841613 | cg10352104 | cg08552167 |
| 3316 | cg08847512 | cg10146514 | cg02144874 |
| 3317 | cg08850243 | cg10146112 | cg05168015 |
| 3318 | cg08860136 | cg10071852 | cg09712234 |
| 3319 | cg08864042 | cg10062065 | cg25148456 |
| 3320 | cg08864083 | cg10057853 | cg14523734 |
| 3321 | cg08866865 | cg10004897 | cg01859228 |
| 3322 | cg08869160 | cg09939191 | cg04304033 |
| 3323 | cg08883078 | cg09845604 | cg03796321 |
| 3324 | cg08883485 | cg09782637 | cg15383141 |
| 3325 | cg08886695 | cg09754828 | cg09688726 |
| 3326 | cg08892499 | cg09701233 | cg01486610 |
| 3327 | cg08894401 | cg09379188 | cg00044665 |
| 3328 | cg08899531 | cg09186408 | cg00210271 |
| 3329 | cg08904630 | cg09076584 | cg18994446 |
| 3330 | cg08912841 | cg09057885 | cg08437576 |
| 3331 | cg08913523 | cg08986340 | cg10550245 |
| 3332 | cg08914150 | cg08644340 | cg19736226 |
| 3333 | cg08915024 | cg08625990 | cg10262770 |
| 3334 | cg08920210 | cg08263571 | cg23117583 |
| 3335 | cg08924256 | cg08206098 | cg02451516 |
| 3336 | cg08924374 | cg08141395 | cg03197830 |

|      |            |            |            |
|------|------------|------------|------------|
| 3337 | cg08932665 | cg08135904 | cg11497526 |
| 3338 | cg08933276 | cg08105005 | cg07058109 |
| 3339 | cg08934318 | cg08073527 | cg08727428 |
| 3340 | cg08934799 | cg07951978 | cg05603553 |
| 3341 | cg08945920 | cg07941953 | cg14875394 |
| 3342 | cg08947774 | cg07834408 | cg00355286 |
| 3343 | cg08955461 | cg07552087 | cg25463863 |
| 3344 | cg08964948 | cg07545858 | cg03391019 |
| 3345 | cg08966188 | cg07541559 | cg00275503 |
| 3346 | cg08966413 | cg07337025 | cg07034004 |
| 3347 | cg08970648 | cg07171780 | cg27278001 |
| 3348 | cg08972190 | cg07044523 | cg07661899 |
| 3349 | cg08973281 | cg07026910 | cg11945095 |
| 3350 | cg08974450 | cg06967828 | cg02246916 |
| 3351 | cg08975850 | cg06919312 | cg27021553 |
| 3352 | cg08976646 | cg06870740 | cg26794830 |
| 3353 | cg08978399 | cg06861572 | cg26053547 |
| 3354 | cg08983215 | cg06851844 | cg04440361 |
| 3355 | cg08986727 | cg06678137 | cg14227418 |
| 3356 | cg08993878 | cg06573945 | cg12160664 |
| 3357 | cg09004351 | cg06556244 | cg18907942 |
| 3358 | cg09006420 | cg06530983 | cg14935206 |
| 3359 | cg09006487 | cg06407441 | cg26937267 |
| 3360 | cg09007161 | cg06323896 | cg14351526 |
| 3361 | cg09009788 | cg06251016 | cg10052840 |
| 3362 | cg09015905 | cg06232205 | cg06012410 |
| 3363 | cg09018739 | cg06198069 | cg06474428 |
| 3364 | cg09020697 | cg06098693 | cg08782674 |
| 3365 | cg09029046 | cg05971891 | cg06522179 |
| 3366 | cg09029193 | cg05900955 | cg03441279 |
| 3367 | cg09033641 | cg05817833 | cg11093939 |
| 3368 | cg09035930 | cg05813328 | cg01138652 |
| 3369 | cg09037712 | cg05757530 | cg21070669 |
| 3370 | cg09038962 | cg05621583 | cg18237191 |
| 3371 | cg09040552 | cg05584950 | cg18978531 |
| 3372 | cg09041614 | cg05309989 | cg09278623 |
| 3373 | cg09043524 | cg05201300 | cg07899389 |
| 3374 | cg09057885 | cg05032848 | cg25878830 |
| 3375 | cg09063434 | cg05024916 | cg08091050 |
| 3376 | cg09073443 | cg04930596 | cg00830283 |
| 3377 | cg09074223 | cg04906603 | cg14081465 |
| 3378 | cg09075515 | cg04815973 | cg23493119 |
| 3379 | cg09076584 | cg04803994 | cg18601229 |
| 3380 | cg09076960 | cg04787317 | cg01945624 |
| 3381 | cg09078622 | cg04697056 | cg20951650 |
| 3382 | cg09086087 | cg04677227 | cg14074351 |
| 3383 | cg09100373 | cg04633661 | cg16201762 |
| 3384 | cg09100695 | cg04573078 | cg08966188 |
| 3385 | cg09101894 | cg04415736 | cg21242508 |
| 3386 | cg09109383 | cg04392554 | cg05851042 |
| 3387 | cg09109553 | cg04269098 | cg26156321 |
| 3388 | cg09115960 | cg04248332 | cg04249706 |
| 3389 | cg09118048 | cg04195226 | cg20793665 |



|      |            |            |            |
|------|------------|------------|------------|
| 3390 | cg09119967 | cg04188241 | cg09541576 |
| 3391 | cg09123760 | cg04091816 | cg27230140 |
| 3392 | cg09123961 | cg04086327 | cg10786098 |
| 3393 | cg09124230 | cg03980268 | cg11468635 |
| 3394 | cg09126859 | cg03630710 | cg06439736 |
| 3395 | cg09139451 | cg03528118 | cg25136955 |
| 3396 | cg09140274 | cg03426615 | cg23894219 |
| 3397 | cg09142117 | cg03339817 | cg15658793 |
| 3398 | cg09142595 | cg03218909 | cg05483875 |
| 3399 | cg09152259 | cg03125400 | cg10546888 |
| 3400 | cg09163478 | cg03035704 | cg13458561 |
| 3401 | cg09163745 | cg02970384 | cg07833472 |
| 3402 | cg09171093 | cg02959112 | cg10512951 |
| 3403 | cg09172973 | cg02832905 | cg24630426 |
| 3404 | cg09174690 | cg02707799 | cg12901650 |
| 3405 | cg09180239 | cg02604995 | cg14833024 |
| 3406 | cg09184899 | cg02512395 | cg26687830 |
| 3407 | cg09186408 | cg02348449 | cg12240637 |
| 3408 | cg09196257 | cg02214441 | cg02827132 |
| 3409 | cg09198138 | cg02162605 | cg10021122 |
| 3410 | cg09198283 | cg02133557 | cg12688942 |
| 3411 | cg09198360 | cg02067239 | cg19402179 |
| 3412 | cg09213124 | cg02017718 | cg19113668 |
| 3413 | cg09214456 | cg02010686 | cg11024450 |
| 3414 | cg09216143 | cg01968525 | cg14088181 |
| 3415 | cg09218398 | cg01810186 | cg08986727 |
| 3416 | cg09226986 | cg01486910 | cg24549289 |
| 3417 | cg09228051 | cg01442132 | cg25032991 |
| 3418 | cg09233395 | cg01414464 | cg18193482 |
| 3419 | cg09238162 | cg01399475 | cg13786171 |
| 3420 | cg09246253 | cg01377082 | cg21929969 |
| 3421 | cg09248660 | cg01296758 | cg02869364 |
| 3422 | cg09249800 | cg01150866 | cg23987336 |
| 3423 | cg09251291 | cg01048810 | cg24639863 |
| 3424 | cg09253696 | cg00952822 | cg23510131 |
| 3425 | cg09255505 | cg00784105 | cg05270552 |
| 3426 | cg09256716 | cg00757262 | cg08342966 |
| 3427 | cg09258509 | cg00694888 | cg19849641 |
| 3428 | cg09259595 | cg00673191 | cg04508340 |
| 3429 | cg09262882 | cg00669182 | cg16359657 |
| 3430 | cg09267483 | cg00488716 | cg15016481 |
| 3431 | cg09268338 | cg00372132 | cg16766036 |
| 3432 | cg09280800 | cg00289254 | cg16885096 |
| 3433 | cg09293488 | cg00262446 | cg10457066 |
| 3434 | cg09300185 | cg00204976 | cg08343075 |
| 3435 | cg09309208 | cg00187129 | cg03566001 |
| 3436 | cg09318508 | cg00048381 | cg26214948 |
| 3437 | cg09320595 | cg27616751 | cg20524889 |
| 3438 | cg09322899 | cg27540799 | cg01543307 |
| 3439 | cg09326135 | cg27478167 | cg05190559 |
| 3440 | cg09326362 | cg27469606 | cg08976646 |
| 3441 | cg09327804 | cg27068650 | cg00367649 |
| 3442 | cg09330834 | cg27042523 | cg19772651 |

|      |            |            |            |
|------|------------|------------|------------|
| 3443 | cg09331409 | cg26947127 | cg00050289 |
| 3444 | cg09333143 | cg26941073 | cg22990726 |
| 3445 | cg09334629 | cg26871875 | cg12508392 |
| 3446 | cg09335314 | cg26798772 | cg10730148 |
| 3447 | cg09335712 | cg26714514 | cg17477806 |
| 3448 | cg09342325 | cg26709309 | cg07654843 |
| 3449 | cg09353705 | cg26709300 | cg14156650 |
| 3450 | cg09356020 | cg26367275 | cg18030799 |
| 3451 | cg09358422 | cg26350921 | cg00333583 |
| 3452 | cg09358481 | cg26184501 | cg14502713 |
| 3453 | cg09358961 | cg25909064 | cg06808089 |
| 3454 | cg09358973 | cg25846061 | cg21617218 |
| 3455 | cg09368832 | cg25722029 | cg19382808 |
| 3456 | cg09370299 | cg25668093 | cg16145211 |
| 3457 | cg09370702 | cg25623727 | cg09597710 |
| 3458 | cg09371084 | cg25613180 | cg26550337 |
| 3459 | cg09372617 | cg25595641 | cg09814231 |
| 3460 | cg09373983 | cg25591418 | cg20322837 |
| 3461 | cg09375892 | cg25535708 | cg16831894 |
| 3462 | cg09379188 | cg25441338 | cg22221847 |
| 3463 | cg09385972 | cg25382652 | cg15164881 |
| 3464 | cg09386073 | cg25199850 | cg17696194 |
| 3465 | cg09389557 | cg24990238 | cg15081886 |
| 3466 | cg09391399 | cg24881558 | cg07560287 |
| 3467 | cg09397692 | cg24468934 | cg13549638 |
| 3468 | cg09400566 | cg24423806 | cg27578381 |
| 3469 | cg09406921 | cg24164238 | cg21292981 |
| 3470 | cg09407273 | cg24073352 | cg20757748 |
| 3471 | cg09410453 | cg23989207 | cg03424213 |
| 3472 | cg09421126 | cg23735646 | cg00912277 |
| 3473 | cg09437283 | cg23626908 | cg25504217 |
| 3474 | cg09444036 | cg23617947 | cg07433905 |
| 3475 | cg09457490 | cg23362032 | cg08545132 |
| 3476 | cg09459955 | cg23280999 | cg04688645 |
| 3477 | cg09464883 | cg23273465 | cg14113353 |
| 3478 | cg09465065 | cg23262213 | cg23166740 |
| 3479 | cg09473315 | cg23225637 | cg09126859 |
| 3480 | cg09474229 | cg23181573 | cg20262021 |
| 3481 | cg09483967 | cg23037644 | cg06038180 |
| 3482 | cg09486967 | cg22516162 | cg23260554 |
| 3483 | cg09489567 | cg22304399 | cg12612065 |
| 3484 | cg09494609 | cg22253401 | cg10824354 |
| 3485 | cg09494646 | cg22221847 | cg19577548 |
| 3486 | cg09495643 | cg22133366 | cg18032164 |
| 3487 | cg09499482 | cg21831649 | cg02604995 |
| 3488 | cg09500421 | cg21756765 | cg24426483 |
| 3489 | cg09501516 | cg21439672 | cg08954601 |
| 3490 | cg09510085 | cg21282907 | cg16680624 |
| 3491 | cg09511351 | cg21268578 | cg17103856 |
| 3492 | cg09511662 | cg21205855 | cg00359087 |
| 3493 | cg09524639 | cg21196487 | cg15684702 |
| 3494 | cg09524658 | cg21176488 | cg26877336 |
| 3495 | cg09526129 | cg21171299 | cg16293569 |

|      |            |            |            |
|------|------------|------------|------------|
| 3496 | cg09529783 | cg21168101 | cg12511749 |
| 3497 | cg09534489 | cg21158737 | cg17525357 |
| 3498 | cg09534872 | cg21063361 | cg01369033 |
| 3499 | cg09536516 | cg21048763 | cg09358961 |
| 3500 | cg09537448 | cg21043481 | cg23085846 |
| 3501 | cg09540676 | cg21032564 | cg10000148 |
| 3502 | cg09541576 | cg21011702 | cg02278728 |
| 3503 | cg09544892 | cg20985758 | cg04026354 |
| 3504 | cg09548893 | cg20916068 | cg17844448 |
| 3505 | cg09551019 | cg20881888 | cg26934881 |
| 3506 | cg09553581 | cg20812052 | cg22998873 |
| 3507 | cg09554406 | cg20540235 | cg10467217 |
| 3508 | cg09555736 | cg20426710 | cg14966346 |
| 3509 | cg09558069 | cg20354777 | cg24773493 |
| 3510 | cg09567735 | cg20349199 | cg01859460 |
| 3511 | cg09569347 | cg20334115 | cg09579081 |
| 3512 | cg09579081 | cg20300794 | cg04622001 |
| 3513 | cg09580592 | cg20143111 | cg10317175 |
| 3514 | cg09580859 | cg20000602 | cg20937296 |
| 3515 | cg09581065 | cg19931529 | cg00563061 |
| 3516 | cg09586198 | cg19865472 | cg21845869 |
| 3517 | cg09596336 | cg19598875 | cg14983540 |
| 3518 | cg09597710 | cg19439043 | cg11860238 |
| 3519 | cg09602138 | cg19238415 | cg16533510 |
| 3520 | cg09607915 | cg19233001 | cg24260710 |
| 3521 | cg09623085 | cg19144954 | cg22060153 |
| 3522 | cg09627339 | cg19062489 | cg13054523 |
| 3523 | cg09631059 | cg19006220 | cg15450139 |
| 3524 | cg09631175 | cg18965684 | cg21004924 |
| 3525 | cg09634481 | cg18960324 | cg23222247 |
| 3526 | cg09637963 | cg18817444 | cg26889437 |
| 3527 | cg09641077 | cg18568570 | cg06093152 |
| 3528 | cg09643151 | cg18539086 | cg14870682 |
| 3529 | cg09647352 | cg18442286 | cg16027775 |
| 3530 | cg09647797 | cg18181891 | cg24674087 |
| 3531 | cg09649196 | cg18172013 | cg16016960 |
| 3532 | cg09650907 | cg18158033 | cg06783380 |
| 3533 | cg09659803 | cg18142262 | cg19032492 |
| 3534 | cg09665571 | cg17966344 | cg24102222 |
| 3535 | cg09669930 | cg17868840 | cg27192012 |
| 3536 | cg09672200 | cg17742459 | cg25066857 |
| 3537 | cg09674368 | cg17649815 | cg06662568 |
| 3538 | cg09674500 | cg17482237 | cg10768996 |
| 3539 | cg09675604 | cg17130544 | cg19357195 |
| 3540 | cg09680719 | cg16718902 | cg27271532 |
| 3541 | cg09685505 | cg16584688 | cg23196346 |
| 3542 | cg09687417 | cg16529592 | cg07139329 |
| 3543 | cg09688726 | cg16522491 | cg04476286 |
| 3544 | cg09695261 | cg16521443 | cg15518113 |
| 3545 | cg09697259 | cg16425726 | cg07733800 |
| 3546 | cg09700054 | cg16084313 | cg13730600 |
| 3547 | cg09701233 | cg16056849 | cg01640684 |
| 3548 | cg09702334 | cg15899800 | cg00674220 |

|      |            |            |            |
|------|------------|------------|------------|
| 3549 | cg09703323 | cg15817440 | cg20329303 |
| 3550 | cg09711421 | cg15658793 | cg11523799 |
| 3551 | cg09712234 | cg15460348 | cg08104310 |
| 3552 | cg09719124 | cg15410236 | cg15561453 |
| 3553 | cg09727436 | cg15352671 | cg22974467 |
| 3554 | cg09729166 | cg15209369 | cg22414151 |
| 3555 | cg09742751 | cg15161050 | cg07736115 |
| 3556 | cg09743906 | cg14992771 | cg13856126 |
| 3557 | cg09754828 | cg14788686 | cg11275487 |
| 3558 | cg09776314 | cg14753356 | cg11815790 |
| 3559 | cg09777637 | cg14658346 | cg13555689 |
| 3560 | cg09780231 | cg14638315 | cg00296038 |
| 3561 | cg09781414 | cg14519777 | cg07665929 |
| 3562 | cg09782637 | cg14487665 | cg06116260 |
| 3563 | cg09786420 | cg14286546 | cg27216597 |
| 3564 | cg09789315 | cg14100888 | cg09889848 |
| 3565 | cg09790512 | cg14096042 | cg16519668 |
| 3566 | cg09790523 | cg14087401 | cg13153540 |
| 3567 | cg09801824 | cg13996750 | cg23546343 |
| 3568 | cg09807875 | cg13964068 | cg13933043 |
| 3569 | cg09809922 | cg13962153 | cg01578585 |
| 3570 | cg09811393 | cg13832457 | cg17202331 |
| 3571 | cg09812790 | cg13765417 | cg23192604 |
| 3572 | cg09814231 | cg13744954 | cg25154482 |
| 3573 | cg09824023 | cg13560612 | cg00706536 |
| 3574 | cg09825670 | cg13499923 | cg07295918 |
| 3575 | cg09829263 | cg13458561 | cg04955856 |
| 3576 | cg09832108 | cg13171107 | cg14842237 |
| 3577 | cg09835239 | cg13135376 | cg21831649 |
| 3578 | cg09837656 | cg13099829 | cg27349909 |
| 3579 | cg09845604 | cg13070650 | cg14425960 |
| 3580 | cg09848749 | cg12900489 | cg26441486 |
| 3581 | cg09849774 | cg12832282 | cg27051683 |
| 3582 | cg09856367 | cg12822242 | cg04574046 |
| 3583 | cg09858160 | cg12799862 | cg15402232 |
| 3584 | cg09859805 | cg12734386 | cg18397308 |
| 3585 | cg09863094 | cg12500891 | cg06338958 |
| 3586 | cg09868556 | cg12417815 | cg12141218 |
| 3587 | cg09869286 | cg12371263 | cg00371570 |
| 3588 | cg09875326 | cg12343881 | cg12179884 |
| 3589 | cg09884107 | cg12166802 | cg08954277 |
| 3590 | cg09886931 | cg12087627 | cg14574066 |
| 3591 | cg09889848 | cg12069547 | cg02700194 |
| 3592 | cg09890339 | cg11961845 | cg16726374 |
| 3593 | cg09890597 | cg11700959 | cg01869896 |
| 3594 | cg09890746 | cg11646638 | cg19724698 |
| 3595 | cg09891393 | cg11496593 | cg17929859 |
| 3596 | cg09892984 | cg11401278 | cg00145911 |
| 3597 | cg09896120 | cg11307417 | cg01866330 |
| 3598 | cg09896867 | cg11288260 | cg17322655 |
| 3599 | cg09897002 | cg11254317 | cg19348272 |
| 3600 | cg09897737 | cg11103999 | cg26905281 |
| 3601 | cg09901529 | cg11060194 | cg19479935 |

|      |            |            |            |
|------|------------|------------|------------|
| 3602 | cg09901532 | cg10921517 | cg15970890 |
| 3603 | cg09905732 | cg10893014 | cg15089272 |
| 3604 | cg09906558 | cg10885338 | cg10298992 |
| 3605 | cg09906780 | cg10809282 | cg20218614 |
| 3606 | cg09911316 | cg10796022 | cg22628240 |
| 3607 | cg09911521 | cg10790470 | cg13571319 |
| 3608 | cg09912552 | cg10756252 | cg03495660 |
| 3609 | cg09913449 | cg10517096 | cg12774921 |
| 3610 | cg09915232 | cg10276623 | cg01293277 |
| 3611 | cg09915883 | cg10273072 | cg02053092 |
| 3612 | cg09920043 | cg10213353 | cg14266952 |
| 3613 | cg09921821 | cg10121745 | cg21887193 |
| 3614 | cg09925620 | cg09989037 | cg04315086 |
| 3615 | cg09925747 | cg09926389 | cg10860364 |
| 3616 | cg09926389 | cg09892984 | cg09142117 |
| 3617 | cg09939191 | cg09814231 | cg11526020 |
| 3618 | cg09950920 | cg09743906 | cg23492249 |
| 3619 | cg09956907 | cg09327804 | cg11701615 |
| 3620 | cg09972881 | cg09041614 | cg01923724 |
| 3621 | cg09975093 | cg08974450 | cg02435083 |
| 3622 | cg09975561 | cg08877591 | cg18604419 |
| 3623 | cg09976716 | cg08787401 | cg11524428 |
| 3624 | cg09989037 | cg08665249 | cg03215152 |
| 3625 | cg09996971 | cg08604505 | cg18581669 |
| 3626 | cg10004897 | cg08603083 | cg03301025 |
| 3627 | cg10005273 | cg08433725 | cg10780981 |
| 3628 | cg10006956 | cg08390994 | cg17400113 |
| 3629 | cg10009207 | cg08313842 | cg22047282 |
| 3630 | cg10009737 | cg08281590 | cg02495250 |
| 3631 | cg10012530 | cg08198711 | cg09988676 |
| 3632 | cg10016358 | cg08183125 | cg24890045 |
| 3633 | cg10016364 | cg08157446 | cg27489873 |
| 3634 | cg10017293 | cg08148618 | cg19130981 |
| 3635 | cg10018519 | cg07804434 | cg12220376 |
| 3636 | cg10019018 | cg07727134 | cg03512577 |
| 3637 | cg10021122 | cg07605062 | cg27073066 |
| 3638 | cg10021749 | cg07486170 | cg00236766 |
| 3639 | cg10024484 | cg07425646 | cg13390372 |
| 3640 | cg10024508 | cg07349899 | cg08642081 |
| 3641 | cg10024583 | cg07296260 | cg18382744 |
| 3642 | cg10034572 | cg07162085 | cg25677394 |
| 3643 | cg10036892 | cg07090980 | cg02685896 |
| 3644 | cg10037894 | cg07038822 | cg11036962 |
| 3645 | cg10052840 | cg06891043 | cg26280578 |
| 3646 | cg10053473 | cg06884199 | cg21591452 |
| 3647 | cg10055950 | cg06849167 | cg18696900 |
| 3648 | cg10057853 | cg06792186 | cg23828593 |
| 3649 | cg10059410 | cg06689039 | cg11252765 |
| 3650 | cg10060631 | cg06584329 | cg23976336 |
| 3651 | cg10063407 | cg06562964 | cg26767198 |
| 3652 | cg10063637 | cg06546521 | cg06633739 |
| 3653 | cg10065736 | cg06474428 | cg03660377 |
| 3654 | cg10077985 | cg06407371 | cg03618741 |

|      |            |            |            |
|------|------------|------------|------------|
| 3655 | cg10082445 | cg06269419 | cg18527971 |
| 3656 | cg10082525 | cg06132803 | cg16585619 |
| 3657 | cg10088715 | cg06018095 | cg22501449 |
| 3658 | cg10089081 | cg05918682 | cg12927785 |
| 3659 | cg10095352 | cg05884394 | cg23301539 |
| 3660 | cg10099813 | cg05797224 | cg05272807 |
| 3661 | cg10101600 | cg05590156 | cg09385972 |
| 3662 | cg10102102 | cg05544807 | cg07555102 |
| 3663 | cg10107322 | cg05508315 | cg24925163 |
| 3664 | cg10107330 | cg05334190 | cg25247887 |
| 3665 | cg10109146 | cg05299486 | cg02263260 |
| 3666 | cg10115918 | cg05279172 | cg18856214 |
| 3667 | cg10119288 | cg05150697 | cg00991659 |
| 3668 | cg10121745 | cg05088513 | cg15874302 |
| 3669 | cg10126181 | cg05060427 | cg13849495 |
| 3670 | cg10129154 | cg04774496 | cg13522118 |
| 3671 | cg10131972 | cg04743876 | cg07770222 |
| 3672 | cg10142436 | cg04714939 | cg09100373 |
| 3673 | cg10146112 | cg04628014 | cg07129714 |
| 3674 | cg10146514 | cg04529785 | cg02047646 |
| 3675 | cg10147974 | cg04402948 | cg23003961 |
| 3676 | cg10149870 | cg04402828 | cg04217556 |
| 3677 | cg10149889 | cg04293307 | cg15974867 |
| 3678 | cg10168009 | cg04145890 | cg01716827 |
| 3679 | cg10174191 | cg04129282 | cg21979773 |
| 3680 | cg10174683 | cg04100595 | cg00637826 |
| 3681 | cg10190898 | cg03958928 | cg20989443 |
| 3682 | cg10193870 | cg03954280 | cg24825262 |
| 3683 | cg10202788 | cg03555203 | cg11912239 |
| 3684 | cg10208609 | cg03528037 | cg03950492 |
| 3685 | cg10213353 | cg03216474 | cg12860109 |
| 3686 | cg10213762 | cg03041650 | cg01663970 |
| 3687 | cg10214757 | cg02993070 | cg24152000 |
| 3688 | cg10215501 | cg02935024 | cg13491731 |
| 3689 | cg10218733 | cg02835462 | cg26383138 |
| 3690 | cg10223066 | cg02785745 | cg26873164 |
| 3691 | cg10227280 | cg02727423 | cg11697861 |
| 3692 | cg10227312 | cg02688118 | cg23202053 |
| 3693 | cg10233454 | cg02631921 | cg04392554 |
| 3694 | cg10237442 | cg02581587 | cg02113604 |
| 3695 | cg10239163 | cg02447556 | cg01428928 |
| 3696 | cg10247864 | cg02365900 | cg03036398 |
| 3697 | cg10248100 | cg02346135 | cg00989505 |
| 3698 | cg10248148 | cg02287325 | cg19949955 |
| 3699 | cg10255535 | cg02272457 | cg13061648 |
| 3700 | cg10257671 | cg02015219 | cg03199926 |
| 3701 | cg10262770 | cg01804278 | cg23626908 |
| 3702 | cg10263684 | cg01761758 | cg25451660 |
| 3703 | cg10273072 | cg01733438 | cg08836729 |
| 3704 | cg10273135 | cg01730064 | cg25963540 |
| 3705 | cg10276623 | cg01523759 | cg09524639 |
| 3706 | cg10277646 | cg01400750 | cg23484234 |
| 3707 | cg10278297 | cg01333205 | cg00266968 |

|      |            |            |            |
|------|------------|------------|------------|
| 3708 | cg10278394 | cg01329151 | cg07425646 |
| 3709 | cg10288921 | cg01166827 | cg08604505 |
| 3710 | cg10294836 | cg01103253 | cg05546878 |
| 3711 | cg10296062 | cg01069043 | cg05399244 |
| 3712 | cg10301695 | cg00998132 | cg00347938 |
| 3713 | cg10311315 | cg00978248 | cg21361322 |
| 3714 | cg10311754 | cg00802617 | cg07572251 |
| 3715 | cg10317175 | cg00729995 | cg22345063 |
| 3716 | cg10319905 | cg00637745 | cg13093285 |
| 3717 | cg10330187 | cg00562504 | cg11390978 |
| 3718 | cg10332437 | cg00503920 | cg13488851 |
| 3719 | cg10332704 | cg00410600 | cg25490527 |
| 3720 | cg10333594 | cg00380428 | cg04260676 |
| 3721 | cg10335736 | cg00268330 | cg07673230 |
| 3722 | cg10338364 | cg00106093 | cg20010135 |
| 3723 | cg10338518 | cg00062282 | cg21997465 |
| 3724 | cg10352104 | cg00060715 | cg17459290 |
| 3725 | cg10354880 | cg27618305 | cg11381282 |
| 3726 | cg10356060 | cg27494100 | cg26613811 |
| 3727 | cg10357989 | cg27424692 | cg05873568 |
| 3728 | cg10360139 | cg27399387 | cg12120430 |
| 3729 | cg10361005 | cg27378814 | cg01667978 |
| 3730 | cg10363202 | cg27269190 | cg04568774 |
| 3731 | cg10364862 | cg27231912 | cg24253714 |
| 3732 | cg10369955 | cg27212729 | cg07577934 |
| 3733 | cg10370305 | cg27196496 | cg09674500 |
| 3734 | cg10371037 | cg27110054 | cg03763874 |
| 3735 | cg10378795 | cg27044591 | cg00841141 |
| 3736 | cg10380108 | cg26977644 | cg00421693 |
| 3737 | cg10388307 | cg26964426 | cg20971998 |
| 3738 | cg10392840 | cg26889437 | cg22295745 |
| 3739 | cg10408178 | cg26796443 | cg11748187 |
| 3740 | cg10409799 | cg26648465 | cg13048437 |
| 3741 | cg10418812 | cg26609642 | cg00864551 |
| 3742 | cg10421435 | cg26597727 | cg05337637 |
| 3743 | cg10425513 | cg26574247 | cg21947590 |
| 3744 | cg10427430 | cg26462488 | cg07230078 |
| 3745 | cg10434728 | cg26413192 | cg05235248 |
| 3746 | cg10453420 | cg26383138 | cg22154992 |
| 3747 | cg10461264 | cg26207909 | cg08550729 |
| 3748 | cg10464467 | cg26187123 | cg17616283 |
| 3749 | cg10467217 | cg26133909 | cg26262482 |
| 3750 | cg10472263 | cg26104640 | cg21158737 |
| 3751 | cg10472320 | cg25953130 | cg04482110 |
| 3752 | cg10480329 | cg25854527 | cg01170069 |
| 3753 | cg10488292 | cg25815219 | cg07674095 |
| 3754 | cg10492836 | cg25652751 | cg18930928 |
| 3755 | cg10493436 | cg25567938 | cg06765552 |
| 3756 | cg10494703 | cg25557739 | cg00277804 |
| 3757 | cg10495754 | cg25405238 | cg08092318 |
| 3758 | cg10496150 | cg25390243 | cg00096810 |
| 3759 | cg10504150 | cg25178749 | cg21696975 |
| 3760 | cg10507281 | cg25066857 | cg22482278 |

|      |            |            |            |
|------|------------|------------|------------|
| 3761 | cg10507988 | cg25007422 | cg26510473 |
| 3762 | cg10508317 | cg24960799 | cg08607612 |
| 3763 | cg10510707 | cg24857399 | cg27100436 |
| 3764 | cg10512089 | cg24711397 | cg07574854 |
| 3765 | cg10512408 | cg24639863 | cg20143111 |
| 3766 | cg10512951 | cg24453118 | cg01487195 |
| 3767 | cg10513161 | cg24304880 | cg11835347 |
| 3768 | cg10514113 | cg24114708 | cg16554164 |
| 3769 | cg10515332 | cg24004007 | cg25187161 |
| 3770 | cg10517096 | cg23989757 | cg17796593 |
| 3771 | cg10519271 | cg23945793 | cg22786631 |
| 3772 | cg10520924 | cg23906872 | cg00665106 |
| 3773 | cg10531372 | cg23844904 | cg27105598 |
| 3774 | cg10532384 | cg23811289 | cg18047920 |
| 3775 | cg10533694 | cg23797615 | cg23477348 |
| 3776 | cg10543634 | cg23782083 | cg04998447 |
| 3777 | cg10545738 | cg23463186 | cg05715422 |
| 3778 | cg10550245 | cg23457862 | cg17341136 |
| 3779 | cg10552275 | cg23206032 | cg25321935 |
| 3780 | cg10555744 | cg23117583 | cg26308909 |
| 3781 | cg10558233 | cg23089261 | cg07748741 |
| 3782 | cg10563645 | cg23087358 | cg14287742 |
| 3783 | cg10571824 | cg23052758 | cg15910594 |
| 3784 | cg10580341 | cg23024810 | cg05678758 |
| 3785 | cg10583144 | cg22974467 | cg10799492 |
| 3786 | cg10584300 | cg22957135 | cg12734852 |
| 3787 | cg10585257 | cg22944823 | cg21211480 |
| 3788 | cg10588276 | cg22888023 | cg06927900 |
| 3789 | cg10589235 | cg22861317 | cg23906687 |
| 3790 | cg10589745 | cg22764700 | cg24586870 |
| 3791 | cg10590657 | cg22752049 | cg26463171 |
| 3792 | cg10601476 | cg22584582 | cg18566883 |
| 3793 | cg10604241 | cg22562003 | cg01501018 |
| 3794 | cg10607485 | cg22466400 | cg18565130 |
| 3795 | cg10607603 | cg22422264 | cg17264541 |
| 3796 | cg10611016 | cg22379668 | cg24809845 |
| 3797 | cg10617494 | cg22173510 | cg19271753 |
| 3798 | cg10617739 | cg22083335 | cg17021949 |
| 3799 | cg10623198 | cg22054793 | cg04175292 |
| 3800 | cg10632728 | cg22047338 | cg20977024 |
| 3801 | cg10634182 | cg21897315 | cg13422164 |
| 3802 | cg10639411 | cg21887193 | cg08257212 |
| 3803 | cg10642330 | cg21870038 | cg13706365 |
| 3804 | cg10644206 | cg21863721 | cg00713972 |
| 3805 | cg10664162 | cg21750915 | cg15241074 |
| 3806 | cg10664272 | cg21719704 | cg23939875 |
| 3807 | cg10664618 | cg21593030 | cg14122652 |
| 3808 | cg10667207 | cg21552014 | cg25887811 |
| 3809 | cg10673740 | cg21230793 | cg00472277 |
| 3810 | cg10676125 | cg21089789 | cg24696473 |
| 3811 | cg10681992 | cg21069814 | cg03098837 |
| 3812 | cg10689512 | cg21017775 | cg00216061 |
| 3813 | cg10691866 | cg20828052 | cg16563454 |



|      |            |            |            |
|------|------------|------------|------------|
| 3814 | cg10692363 | cg20771808 | cg11828470 |
| 3815 | cg10705306 | cg20600205 | cg08894066 |
| 3816 | cg10713589 | cg20476021 | cg27406975 |
| 3817 | cg10714160 | cg20438460 | cg03528118 |
| 3818 | cg10714509 | cg20336472 | cg01723163 |
| 3819 | cg10716356 | cg20158671 | cg27076552 |
| 3820 | cg10721220 | cg20069939 | cg15627277 |
| 3821 | cg10722267 | cg19901381 | cg04088152 |
| 3822 | cg10724774 | cg19745930 | cg08932665 |
| 3823 | cg10726559 | cg19736226 | cg24845165 |
| 3824 | cg10730148 | cg19714865 | cg18885289 |
| 3825 | cg10731848 | cg19621160 | cg27599376 |
| 3826 | cg10734581 | cg19618438 | cg15127702 |
| 3827 | cg10737521 | cg19604110 | cg14431528 |
| 3828 | cg10738865 | cg19567295 | cg17439009 |
| 3829 | cg10740573 | cg19528797 | cg14413378 |
| 3830 | cg10754670 | cg19514230 | cg16617141 |
| 3831 | cg10756252 | cg19503351 | cg24525461 |
| 3832 | cg10759972 | cg19415091 | cg04524477 |
| 3833 | cg10762613 | cg19288921 | cg27643147 |
| 3834 | cg10768996 | cg19048950 | cg13731636 |
| 3835 | cg10774480 | cg18885289 | cg27078464 |
| 3836 | cg10780981 | cg18819574 | cg14065153 |
| 3837 | cg10786098 | cg18809729 | cg12817154 |
| 3838 | cg10790470 | cg18798744 | cg11843516 |
| 3839 | cg10796022 | cg18749563 | cg16052388 |
| 3840 | cg10796068 | cg18677278 | cg10504150 |
| 3841 | cg10798745 | cg18595065 | cg17036641 |
| 3842 | cg10799492 | cg18352616 | cg04311473 |
| 3843 | cg10802680 | cg18323018 | cg00103778 |
| 3844 | cg10805676 | cg18233538 | cg04254540 |
| 3845 | cg10810026 | cg18177819 | cg17497965 |
| 3846 | cg10810290 | cg18035571 | cg16949378 |
| 3847 | cg10811426 | cg17860133 | cg24630383 |
| 3848 | cg10811485 | cg17838182 | cg23203730 |
| 3849 | cg10813908 | cg17780565 | cg20847114 |
| 3850 | cg10818702 | cg17732044 | cg15175632 |
| 3851 | cg10820904 | cg17537252 | cg03307425 |
| 3852 | cg10824354 | cg17517442 | cg00436722 |
| 3853 | cg10827094 | cg17415355 | cg19909613 |
| 3854 | cg10827460 | cg17361593 | cg20300651 |
| 3855 | cg10828599 | cg17254904 | cg14064268 |
| 3856 | cg10829693 | cg17211223 | cg02362505 |
| 3857 | cg10844382 | cg17169982 | cg00767010 |
| 3858 | cg10856972 | cg16976520 | cg01959262 |
| 3859 | cg10857774 | cg16965936 | cg10227312 |
| 3860 | cg10859133 | cg16892393 | cg13707189 |
| 3861 | cg10859358 | cg16738646 | cg04352404 |
| 3862 | cg10862981 | cg16717225 | cg14140717 |
| 3863 | cg10872457 | cg16642938 | cg18069174 |
| 3864 | cg10884953 | cg16525330 | cg02806032 |
| 3865 | cg10886334 | cg16499956 | cg23079522 |
| 3866 | cg10888242 | cg16366809 | cg06387842 |

|      |            |            |            |
|------|------------|------------|------------|
| 3867 | cg10890199 | cg16106903 | cg08945920 |
| 3868 | cg10893014 | cg16034562 | cg18940830 |
| 3869 | cg10897631 | cg16023122 | cg03234557 |
| 3870 | cg10898310 | cg15980914 | cg14132388 |
| 3871 | cg10899681 | cg15892617 | cg02901002 |
| 3872 | cg10902107 | cg15878619 | cg22616343 |
| 3873 | cg10902667 | cg15776300 | cg19450111 |
| 3874 | cg10904740 | cg15756507 | cg22946562 |
| 3875 | cg10904856 | cg15693937 | cg16684117 |
| 3876 | cg10907727 | cg15532236 | cg19847601 |
| 3877 | cg10917602 | cg15518113 | cg13411507 |
| 3878 | cg10921517 | cg15498306 | cg00374717 |
| 3879 | cg10921702 | cg15407257 | cg22013790 |
| 3880 | cg10931901 | cg14947466 | cg00881300 |
| 3881 | cg10937494 | cg14919455 | cg13499600 |
| 3882 | cg10950593 | cg14839134 | cg24875415 |
| 3883 | cg10959933 | cg14583973 | cg22150680 |
| 3884 | cg10963218 | cg14543285 | cg01866959 |
| 3885 | cg10965164 | cg14475381 | cg14916108 |
| 3886 | cg10965996 | cg14468090 | cg27180994 |
| 3887 | cg10968396 | cg14455781 | cg02704946 |
| 3888 | cg10976861 | cg14304073 | cg08412188 |
| 3889 | cg10977734 | cg14297023 | cg27092248 |
| 3890 | cg10979364 | cg14281591 | cg20320158 |
| 3891 | cg10980293 | cg14270348 | cg11468233 |
| 3892 | cg10980495 | cg14244878 | cg10876003 |
| 3893 | cg10982692 | cg14149492 | cg26609642 |
| 3894 | cg10982964 | cg14118946 | cg05884394 |
| 3895 | cg10989175 | cg13947385 | cg13236409 |
| 3896 | cg11007190 | cg13943333 | cg16960291 |
| 3897 | cg11009590 | cg13885965 | cg06087826 |
| 3898 | cg11010976 | cg13798679 | cg13956443 |
| 3899 | cg11018723 | cg13753526 | cg14681171 |
| 3900 | cg11024450 | cg13629563 | cg19528797 |
| 3901 | cg11025609 | cg13586696 | cg01696984 |
| 3902 | cg11025750 | cg13441142 | cg22861317 |
| 3903 | cg11027058 | cg13414581 | cg09558069 |
| 3904 | cg11028291 | cg13360638 | cg07475178 |
| 3905 | cg11030811 | cg13332783 | cg11490944 |
| 3906 | cg11035122 | cg13299824 | cg14190344 |
| 3907 | cg11036962 | cg13274014 | cg14852276 |
| 3908 | cg11037787 | cg13269555 | cg00845883 |
| 3909 | cg11041314 | cg13151645 | cg26601559 |
| 3910 | cg11043092 | cg13107973 | cg27344022 |
| 3911 | cg11046578 | cg13068653 | cg20579480 |
| 3912 | cg11046864 | cg12925881 | cg17868840 |
| 3913 | cg11051022 | cg12847536 | cg03739877 |
| 3914 | cg11060194 | cg12747076 | cg10102736 |
| 3915 | cg11069071 | cg12659065 | cg03701759 |
| 3916 | cg11079426 | cg12528056 | cg22539584 |
| 3917 | cg11080651 | cg12508392 | cg03163783 |
| 3918 | cg11081826 | cg12491114 | cg11313862 |
| 3919 | cg11084269 | cg12452298 | cg19514230 |

|      |            |            |            |
|------|------------|------------|------------|
| 3920 | cg11087939 | cg12429455 | cg23385847 |
| 3921 | cg11092157 | cg12279175 | cg20713092 |
| 3922 | cg11095122 | cg12176815 | cg00552168 |
| 3923 | cg11101316 | cg12156167 | cg09604238 |
| 3924 | cg11103999 | cg12142346 | cg07811002 |
| 3925 | cg11108115 | cg11973602 | cg09464883 |
| 3926 | cg11115867 | cg11794120 | cg06967316 |
| 3927 | cg11116288 | cg11706790 | cg18583329 |
| 3928 | cg11124652 | cg11699517 | cg05057834 |
| 3929 | cg11139446 | cg11425149 | cg21613549 |
| 3930 | cg11148096 | cg11272705 | cg12412384 |
| 3931 | cg11150559 | cg11093939 | cg10019018 |
| 3932 | cg11151524 | cg10982964 | cg25719378 |
| 3933 | cg11152884 | cg10968396 | cg23522522 |
| 3934 | cg11155016 | cg10937494 | cg05516390 |
| 3935 | cg11161142 | cg10844382 | cg23470262 |
| 3936 | cg11174847 | cg10824354 | cg03779973 |
| 3937 | cg11176525 | cg10768996 | cg14210001 |
| 3938 | cg11189177 | cg10716356 | cg02155048 |
| 3939 | cg11190278 | cg10504150 | cg04774930 |
| 3940 | cg11190890 | cg10208609 | cg21185187 |
| 3941 | cg11197908 | cg10171557 | cg25142010 |
| 3942 | cg11198094 | cg10126181 | cg01277910 |
| 3943 | cg11199137 | cg10088715 | cg01088579 |
| 3944 | cg11199862 | cg09889848 | cg11007190 |
| 3945 | cg11203377 | cg09875326 | cg09647352 |
| 3946 | cg11205589 | cg09851241 | cg09795809 |
| 3947 | cg11207081 | cg09649196 | cg04907595 |
| 3948 | cg11210357 | cg09646558 | cg11719457 |
| 3949 | cg11215918 | cg09596336 | cg22215392 |
| 3950 | cg11218175 | cg09579081 | cg24989405 |
| 3951 | cg11225330 | cg09554406 | cg02936315 |
| 3952 | cg11227822 | cg09519954 | cg18817444 |
| 3953 | cg11231069 | cg09444036 | cg01260603 |
| 3954 | cg11234767 | cg09391399 | cg22619784 |
| 3955 | cg11241684 | cg09335911 | cg27492839 |
| 3956 | cg11248182 | cg09262882 | cg27074355 |
| 3957 | cg11251006 | cg09152259 | cg01436550 |
| 3958 | cg11252765 | cg09123760 | cg17574471 |
| 3959 | cg11254317 | cg08945920 | cg00916659 |
| 3960 | cg11258489 | cg08914150 | cg27053040 |
| 3961 | cg11263420 | cg08904630 | cg08124986 |
| 3962 | cg11272705 | cg08863422 | cg24518609 |
| 3963 | cg11272874 | cg08831077 | cg03980268 |
| 3964 | cg11275487 | cg08784950 | cg18294610 |
| 3965 | cg11284582 | cg08740088 | cg11199137 |
| 3966 | cg11285912 | cg08727428 | cg18484068 |
| 3967 | cg11288260 | cg08682625 | cg13680246 |
| 3968 | cg11307417 | cg08644106 | cg22885000 |
| 3969 | cg11311843 | cg08566548 | cg03655701 |
| 3970 | cg11313862 | cg08552446 | cg01475325 |
| 3971 | cg11321921 | cg08365802 | cg16290996 |
| 3972 | cg11327857 | cg08365638 | cg01753263 |

|      |            |            |            |
|------|------------|------------|------------|
| 3973 | cg11341086 | cg08365388 | cg13251842 |
| 3974 | cg11343506 | cg08258506 | cg01676623 |
| 3975 | cg11344729 | cg08137602 | cg08345465 |
| 3976 | cg11346522 | cg07833472 | cg10886334 |
| 3977 | cg11351841 | cg07805999 | cg20784591 |
| 3978 | cg11363168 | cg07662964 | cg27082076 |
| 3979 | cg11372818 | cg07503211 | cg20963020 |
| 3980 | cg11381282 | cg07495357 | cg05755441 |
| 3981 | cg11390978 | cg07477924 | cg23408990 |
| 3982 | cg11391732 | cg07336964 | cg11671308 |
| 3983 | cg11400143 | cg07285148 | cg13439189 |
| 3984 | cg11400707 | cg07268431 | cg16051954 |
| 3985 | cg11401278 | cg07236781 | cg10263684 |
| 3986 | cg11405458 | cg07192047 | cg17877600 |
| 3987 | cg11409060 | cg07156484 | cg17680611 |
| 3988 | cg11415402 | cg07155331 | cg03431067 |
| 3989 | cg11425149 | cg07097367 | cg07079828 |
| 3990 | cg11436027 | cg07094487 | cg00903308 |
| 3991 | cg11438039 | cg07034004 | cg03661844 |
| 3992 | cg11439877 | cg07014438 | cg05339403 |
| 3993 | cg11444072 | cg06938890 | cg00707452 |
| 3994 | cg11449408 | cg06889272 | cg00892999 |
| 3995 | cg11457582 | cg06824199 | cg20158671 |
| 3996 | cg11459133 | cg06797069 | cg02638755 |
| 3997 | cg11462099 | cg06591973 | cg10495754 |
| 3998 | cg11469540 | cg06539449 | cg02389084 |
| 3999 | cg11476985 | cg06368978 | cg02598618 |
| 4000 | cg11482422 | cg06237774 | cg12855331 |
| 4001 | cg11490961 | cg06225767 | cg02122052 |
| 4002 | cg11492886 | cg06218688 | cg17518949 |
| 4003 | cg11496593 | cg06173481 | cg13558912 |
| 4004 | cg11497017 | cg06159340 | cg09972881 |
| 4005 | cg11512026 | cg06125821 | cg18624777 |
| 4006 | cg11517528 | cg06115826 | cg21611093 |
| 4007 | cg11519725 | cg06058262 | cg12049462 |
| 4008 | cg11523191 | cg06037365 | cg19548479 |
| 4009 | cg11523661 | cg05996835 | cg20609679 |
| 4010 | cg11524428 | cg05845879 | cg00854594 |
| 4011 | cg11526020 | cg05825120 | cg26709309 |
| 4012 | cg11530995 | cg05781582 | cg03980715 |
| 4013 | cg11535638 | cg05700348 | cg27171605 |
| 4014 | cg11538848 | cg05668807 | cg20703928 |
| 4015 | cg11544882 | cg05559648 | cg07262506 |
| 4016 | cg11546709 | cg05376738 | cg25116615 |
| 4017 | cg11547122 | cg05368971 | cg07148207 |
| 4018 | cg11553311 | cg05339066 | cg01598009 |
| 4019 | cg11564792 | cg05309505 | cg17977723 |
| 4020 | cg11567885 | cg05088794 | cg14062899 |
| 4021 | cg11575912 | cg05041871 | cg19883388 |
| 4022 | cg11576424 | cg04955856 | cg14701122 |
| 4023 | cg11576988 | cg04911180 | cg16650096 |
| 4024 | cg11583751 | cg04885333 | cg19047670 |
| 4025 | cg11585280 | cg04800347 | cg01778908 |

|      |            |            |            |
|------|------------|------------|------------|
| 4026 | cg11585301 | cg04780481 | cg23144649 |
| 4027 | cg11588197 | cg04623131 | cg21183664 |
| 4028 | cg11589139 | cg04604708 | cg10009207 |
| 4029 | cg11592377 | cg04585669 | cg11497017 |
| 4030 | cg11592677 | cg04534503 | cg12087627 |
| 4031 | cg11601967 | cg04398861 | cg00358442 |
| 4032 | cg11609668 | cg04360147 | cg06919312 |
| 4033 | cg11612905 | cg04352404 | cg18761976 |
| 4034 | cg11628781 | cg04328729 | cg00147160 |
| 4035 | cg11628880 | cg04262465 | cg11940177 |
| 4036 | cg11631173 | cg04226256 | cg14207326 |
| 4037 | cg11632592 | cg04175417 | cg22599005 |
| 4038 | cg11637968 | cg04088152 | cg11401278 |
| 4039 | cg11646638 | cg04080724 | cg09809922 |
| 4040 | cg11650648 | cg03970032 | cg12113251 |
| 4041 | cg11654662 | cg03918756 | cg04411052 |
| 4042 | cg11661534 | cg03899510 | cg07941953 |
| 4043 | cg11662712 | cg03881382 | cg03101580 |
| 4044 | cg11668876 | cg03789507 | cg21201494 |
| 4045 | cg11671308 | cg03778594 | cg02711397 |
| 4046 | cg11671925 | cg03660377 | cg15710638 |
| 4047 | cg11672338 | cg03640756 | cg27275022 |
| 4048 | cg11685391 | cg03606646 | cg10370025 |
| 4049 | cg11691844 | cg03515246 | cg01943414 |
| 4050 | cg11695684 | cg03457485 | cg03631837 |
| 4051 | cg11697433 | cg03254566 | cg24738346 |
| 4052 | cg11697861 | cg03131767 | cg12389888 |
| 4053 | cg11698119 | cg03129134 | cg10235845 |
| 4054 | cg11699517 | cg03077671 | cg03400139 |
| 4055 | cg11700356 | cg03050965 | cg08377924 |
| 4056 | cg11700959 | cg03047420 | cg23332610 |
| 4057 | cg11703722 | cg03035359 | cg18222083 |
| 4058 | cg11703759 | cg03023681 | cg24628866 |
| 4059 | cg11706540 | cg02940562 | cg26744332 |
| 4060 | cg11706790 | cg02855558 | cg21316772 |
| 4061 | cg11717552 | cg02710481 | cg11873161 |
| 4062 | cg11718965 | cg02638755 | cg05088605 |
| 4063 | cg11719457 | cg02625138 | cg18090631 |
| 4064 | cg11724511 | cg02607544 | cg23736055 |
| 4065 | cg11725852 | cg02552250 | cg19593878 |
| 4066 | cg11728201 | cg02495250 | cg12866859 |
| 4067 | cg11731626 | cg02358804 | cg18386876 |
| 4068 | cg11743827 | cg02339793 | cg09342325 |
| 4069 | cg11753157 | cg02338778 | cg17799760 |
| 4070 | cg11758841 | cg02228688 | cg02567151 |
| 4071 | cg11761615 | cg02192555 | cg15083845 |
| 4072 | cg11762760 | cg02172773 | cg05484458 |
| 4073 | cg11777290 | cg02137970 | cg03379631 |
| 4074 | cg11786870 | cg02108015 | cg18095041 |
| 4075 | cg11792186 | cg02078525 | cg13089661 |
| 4076 | cg11794120 | cg02041470 | cg20161791 |
| 4077 | cg11802013 | cg01997461 | cg18741439 |
| 4078 | cg11804414 | cg01991625 | cg16385941 |

|      |            |            |            |
|------|------------|------------|------------|
| 4079 | cg11806749 | cg01942927 | cg09037712 |
| 4080 | cg11809476 | cg01794853 | cg01792229 |
| 4081 | cg11815072 | cg01618851 | cg03380645 |
| 4082 | cg11815790 | cg01570589 | cg18201671 |
| 4083 | cg11816841 | cg01422416 | cg22582721 |
| 4084 | cg11818853 | cg01323212 | cg25875209 |
| 4085 | cg11819469 | cg01298912 | cg08768904 |
| 4086 | cg11822372 | cg01262865 | cg05539509 |
| 4087 | cg11828470 | cg01227084 | cg16797656 |
| 4088 | cg11828741 | cg01176141 | cg08463775 |
| 4089 | cg11828820 | cg01101448 | cg22197033 |
| 4090 | cg11834956 | cg01062470 | cg16762085 |
| 4091 | cg11835347 | cg00927435 | cg03031526 |
| 4092 | cg11840849 | cg00904122 | cg20139145 |
| 4093 | cg11843516 | cg00903438 | cg19702703 |
| 4094 | cg11843691 | cg00899463 | cg04555379 |
| 4095 | cg11843948 | cg00786138 | cg07907506 |
| 4096 | cg11844358 | cg00767010 | cg18240528 |
| 4097 | cg11844464 | cg00755287 | cg21755755 |
| 4098 | cg11847597 | cg00520380 | cg00314994 |
| 4099 | cg11848157 | cg00473257 | cg13298538 |
| 4100 | cg11850468 | cg00472277 | cg00828762 |
| 4101 | cg11852646 | cg00367649 | cg24244437 |
| 4102 | cg11854392 | cg00333583 | cg04627183 |
| 4103 | cg11860238 | cg00330518 | cg11009590 |
| 4104 | cg11864076 | cg00086171 | cg17475200 |
| 4105 | cg11865296 | cg00044665 | cg02116283 |
| 4106 | cg11869499 | cg27526774 | cg24648594 |
| 4107 | cg11873161 | cg27478020 | cg01254644 |
| 4108 | cg11888359 | cg27395391 | cg04041283 |
| 4109 | cg11888747 | cg27344022 | cg27007717 |
| 4110 | cg11894474 | cg27333269 | cg20078454 |
| 4111 | cg11897120 | cg27306787 | cg16745596 |
| 4112 | cg11898009 | cg27277104 | cg16488544 |
| 4113 | cg11908294 | cg27186013 | cg04585669 |
| 4114 | cg11909137 | cg27158462 | cg06378490 |
| 4115 | cg11909989 | cg27156542 | cg21159068 |
| 4116 | cg11912239 | cg26970113 | cg13139630 |
| 4117 | cg11915444 | cg26951000 | cg00001809 |
| 4118 | cg11919577 | cg26905281 | cg27333269 |
| 4119 | cg11929154 | cg26721908 | cg20767977 |
| 4120 | cg11935248 | cg26677892 | cg17850498 |
| 4121 | cg11936643 | cg26585452 | cg09511662 |
| 4122 | cg11936817 | cg26460678 | cg22315164 |
| 4123 | cg11940177 | cg26448609 | cg17284725 |
| 4124 | cg11940726 | cg26421308 | cg09123760 |
| 4125 | cg11945095 | cg26394825 | cg05516020 |
| 4126 | cg11945474 | cg26392980 | cg08924374 |
| 4127 | cg11951169 | cg26261873 | cg07349899 |
| 4128 | cg11952493 | cg26165908 | cg07468956 |
| 4129 | cg11952839 | cg26034516 | cg09139451 |
| 4130 | cg11952908 | cg26011438 | cg19931596 |
| 4131 | cg11958644 | cg26001655 | cg11697433 |

|      |            |            |            |
|------|------------|------------|------------|
| 4132 | cg11958668 | cg25963540 | cg05280797 |
| 4133 | cg11960033 | cg25945499 | cg11254847 |
| 4134 | cg11961845 | cg25852715 | cg06379876 |
| 4135 | cg11964216 | cg25835936 | cg13753460 |
| 4136 | cg11966063 | cg25729585 | cg18091245 |
| 4137 | cg11971852 | cg25638714 | cg10982692 |
| 4138 | cg11973602 | cg25634000 | cg08510718 |
| 4139 | cg11976592 | cg25596405 | cg02021485 |
| 4140 | cg11977716 | cg25532627 | cg04658841 |
| 4141 | cg11979837 | cg25488990 | cg24271718 |
| 4142 | cg11980500 | cg25296804 | cg16554534 |
| 4143 | cg11982525 | cg25268422 | cg12136716 |
| 4144 | cg11990296 | cg25118879 | cg25827936 |
| 4145 | cg11994639 | cg25033220 | cg09725874 |
| 4146 | cg11995490 | cg25019378 | cg07337025 |
| 4147 | cg11996592 | cg24976262 | cg14841828 |
| 4148 | cg11997603 | cg24970620 | cg15035360 |
| 4149 | cg11998932 | cg24960639 | cg07545858 |
| 4150 | cg12005412 | cg24939470 | cg26872742 |
| 4151 | cg12017558 | cg24732123 | cg06815308 |
| 4152 | cg12019806 | cg24724937 | cg03384915 |
| 4153 | cg12019990 | cg24437408 | cg23362032 |
| 4154 | cg12025243 | cg24386905 | cg12708994 |
| 4155 | cg12036877 | cg24319076 | cg13618969 |
| 4156 | cg12049462 | cg24244437 | cg16649474 |
| 4157 | cg12051710 | cg24191821 | cg26503877 |
| 4158 | cg12054698 | cg24186506 | cg06566615 |
| 4159 | cg12058043 | cg24107411 | cg12819011 |
| 4160 | cg12058875 | cg24008544 | cg14790609 |
| 4161 | cg12061219 | cg24003508 | cg20668718 |
| 4162 | cg12062088 | cg23881119 | cg21667939 |
| 4163 | cg12064373 | cg23834688 | cg19441674 |
| 4164 | cg12068791 | cg23783444 | cg00308508 |
| 4165 | cg12069132 | cg23626961 | cg27351813 |
| 4166 | cg12069547 | cg23510131 | cg19486804 |
| 4167 | cg12070646 | cg23490822 | cg04944177 |
| 4168 | cg12071544 | cg23413464 | cg15318570 |
| 4169 | cg12072024 | cg23401741 | cg02524863 |
| 4170 | cg12072973 | cg23386779 | cg20141509 |
| 4171 | cg12075498 | cg23202053 | cg22192454 |
| 4172 | cg12075928 | cg23003961 | cg15879620 |
| 4173 | cg12076543 | cg22992258 | cg05134769 |
| 4174 | cg12077685 | cg22920258 | cg05037556 |
| 4175 | cg12079279 | cg22814801 | cg04780481 |
| 4176 | cg12081291 | cg22788065 | cg11695684 |
| 4177 | cg12087627 | cg22622505 | cg27571590 |
| 4178 | cg12092201 | cg22532194 | cg00091004 |
| 4179 | cg12093220 | cg22459052 | cg16794682 |
| 4180 | cg12093620 | cg22356839 | cg26127166 |
| 4181 | cg12106976 | cg22169866 | cg25286715 |
| 4182 | cg12108265 | cg22123915 | cg09555736 |
| 4183 | cg12109728 | cg22011888 | cg11251006 |
| 4184 | cg12112434 | cg21597937 | cg02067239 |

|      |            |            |            |
|------|------------|------------|------------|
| 4185 | cg12119133 | cg21546226 | cg03600605 |
| 4186 | cg12120430 | cg21535761 | cg27170206 |
| 4187 | cg12121782 | cg21504064 | cg19771975 |
| 4188 | cg12129983 | cg21379004 | cg10654373 |
| 4189 | cg12136716 | cg21279756 | cg05777316 |
| 4190 | cg12141218 | cg21228259 | cg00175895 |
| 4191 | cg12142346 | cg21045072 | cg23951305 |
| 4192 | cg12143499 | cg20952105 | cg06937201 |
| 4193 | cg12149319 | cg20826610 | cg04500730 |
| 4194 | cg12153709 | cg20808227 | cg17589890 |
| 4195 | cg12156167 | cg20668718 | cg16704938 |
| 4196 | cg12160664 | cg20397614 | cg19040077 |
| 4197 | cg12161625 | cg20349803 | cg15026277 |
| 4198 | cg12163781 | cg20190649 | cg07083272 |
| 4199 | cg12163952 | cg20173014 | cg26467269 |
| 4200 | cg12166802 | cg20137441 | cg09038962 |
| 4201 | cg12167489 | cg19998675 | cg09118048 |
| 4202 | cg12176815 | cg19987219 | cg25722029 |
| 4203 | cg12179884 | cg19897003 | cg09353705 |
| 4204 | cg12183501 | cg19713140 | cg01537847 |
| 4205 | cg12185975 | cg19525780 | cg00757262 |
| 4206 | cg12186219 | cg19418951 | cg13397568 |
| 4207 | cg12195230 | cg19287349 | cg19083914 |
| 4208 | cg12204166 | cg19241089 | cg01679473 |
| 4209 | cg12219134 | cg19170881 | cg21562750 |
| 4210 | cg12220376 | cg19123356 | cg27130493 |
| 4211 | cg12231088 | cg19055390 | cg08933276 |
| 4212 | cg12232388 | cg18919478 | cg05851887 |
| 4213 | cg12233100 | cg18855096 | cg08912841 |
| 4214 | cg12240637 | cg18829162 | cg04714939 |
| 4215 | cg12240761 | cg18820914 | cg07129769 |
| 4216 | cg12250561 | cg18817459 | cg07162085 |
| 4217 | cg12251803 | cg18793661 | cg17601658 |
| 4218 | cg12265604 | cg18549386 | cg17537493 |
| 4219 | cg12267069 | cg18386876 | cg22463097 |
| 4220 | cg12271433 | cg18348566 | cg02264288 |
| 4221 | cg12279175 | cg17822706 | cg20100049 |
| 4222 | cg12284521 | cg17702736 | cg12064373 |
| 4223 | cg12302797 | cg17477806 | cg01722498 |
| 4224 | cg12308279 | cg17343483 | cg14117392 |
| 4225 | cg12312338 | cg17243540 | cg01683570 |
| 4226 | cg12339425 | cg17226348 | cg11628880 |
| 4227 | cg12343881 | cg17201542 | cg12077685 |
| 4228 | cg12351906 | cg17185710 | cg00373967 |
| 4229 | cg12352896 | cg16902190 | cg02898721 |
| 4230 | cg12362980 | cg16867086 | cg24990238 |
| 4231 | cg12367539 | cg16741602 | cg13745832 |
| 4232 | cg12367789 | cg16723180 | cg10885338 |
| 4233 | cg12371263 | cg16707423 | cg13957538 |
| 4234 | cg12371563 | cg16461139 | cg25711239 |
| 4235 | cg12379145 | cg16387467 | cg18378662 |
| 4236 | cg12384918 | cg16328007 | cg17781958 |
| 4237 | cg12389888 | cg16326073 | cg06790069 |



|      |            |            |            |
|------|------------|------------|------------|
| 4238 | cg12392429 | cg16269144 | cg07097367 |
| 4239 | cg12395479 | cg16221927 | cg01972651 |
| 4240 | cg12397802 | cg16168321 | cg22909085 |
| 4241 | cg12412384 | cg16163756 | cg06386880 |
| 4242 | cg12413156 | cg16163535 | cg01297744 |
| 4243 | cg12416830 | cg16102778 | cg14162011 |
| 4244 | cg12417362 | cg16060382 | cg06647026 |
| 4245 | cg12417815 | cg16030972 | cg06632214 |
| 4246 | cg12417871 | cg16006963 | cg18318722 |
| 4247 | cg12419932 | cg15710638 | cg26225655 |
| 4248 | cg12422551 | cg15617847 | cg01038640 |
| 4249 | cg12429455 | cg15382580 | cg07014438 |
| 4250 | cg12433926 | cg15269148 | cg17221945 |
| 4251 | cg12442385 | cg15241074 | cg07336964 |
| 4252 | cg12448539 | cg14884828 | cg20102955 |
| 4253 | cg12448664 | cg14830485 | cg09300185 |
| 4254 | cg12450391 | cg14769121 | cg26162025 |
| 4255 | cg12452298 | cg14763173 | cg09896867 |
| 4256 | cg12456379 | cg14758812 | cg09465065 |
| 4257 | cg12459932 | cg14758740 | cg26411080 |
| 4258 | cg12467090 | cg14744022 | cg15988204 |
| 4259 | cg12467435 | cg14699728 | cg13700939 |
| 4260 | cg12467960 | cg14681171 | cg20731213 |
| 4261 | cg12468255 | cg14524975 | cg16572410 |
| 4262 | cg12469964 | cg14497697 | cg21282907 |
| 4263 | cg12474695 | cg14476630 | cg14966074 |
| 4264 | cg12481567 | cg14328761 | cg18013789 |
| 4265 | cg12485685 | cg14313184 | cg09444036 |
| 4266 | cg12486287 | cg14136781 | cg08993878 |
| 4267 | cg12486498 | cg14132388 | cg15904939 |
| 4268 | cg12491114 | cg14126884 | cg01778994 |
| 4269 | cg12491594 | cg14102880 | cg04727924 |
| 4270 | cg12494355 | cg14092259 | cg17112949 |
| 4271 | cg12497581 | cg14070108 | cg26763380 |
| 4272 | cg12499572 | cg14001914 | cg12702354 |
| 4273 | cg12500891 | cg13971603 | cg24321688 |
| 4274 | cg12508392 | cg13919369 | cg15817440 |
| 4275 | cg12511749 | cg13916835 | cg06123891 |
| 4276 | cg12514933 | cg13856126 | cg09333143 |
| 4277 | cg12522144 | cg13849999 | cg10472711 |
| 4278 | cg12526346 | cg13747876 | cg07152894 |
| 4279 | cg12526923 | cg13727957 | cg05224498 |
| 4280 | cg12528056 | cg13721644 | cg26100137 |
| 4281 | cg12529228 | cg13571319 | cg27020028 |
| 4282 | cg12550496 | cg13499600 | cg08712631 |
| 4283 | cg12551582 | cg13411507 | cg14875081 |
| 4284 | cg12552626 | cg13332142 | cg10740573 |
| 4285 | cg12555086 | cg13048437 | cg17322118 |
| 4286 | cg12569216 | cg13028113 | cg00808555 |
| 4287 | cg12579684 | cg12955277 | cg07858195 |
| 4288 | cg12583325 | cg12467435 | cg06787609 |
| 4289 | cg12590668 | cg12448539 | cg25521853 |
| 4290 | cg12591125 | cg12422551 | cg00554604 |

|      |            |            |            |
|------|------------|------------|------------|
| 4291 | cg12591689 | cg12302797 | cg08703151 |
| 4292 | cg12595461 | cg12081291 | cg22133366 |
| 4293 | cg12598178 | cg12068791 | cg04745820 |
| 4294 | cg12599569 | cg12058875 | cg13545717 |
| 4295 | cg12604490 | cg12058043 | cg12156838 |
| 4296 | cg12609948 | cg11964216 | cg13520715 |
| 4297 | cg12614090 | cg11919577 | cg08258506 |
| 4298 | cg12616177 | cg11861709 | cg21528710 |
| 4299 | cg12629008 | cg11806749 | cg15063366 |
| 4300 | cg12640387 | cg11722816 | cg23053961 |
| 4301 | cg12642717 | cg11718965 | cg09358973 |
| 4302 | cg12650685 | cg11714334 | cg00147216 |
| 4303 | cg12657297 | cg11703722 | cg27160524 |
| 4304 | cg12657361 | cg11691844 | cg24244854 |
| 4305 | cg12659065 | cg11668876 | cg19865472 |
| 4306 | cg12667792 | cg11190278 | cg08694923 |
| 4307 | cg12669271 | cg11161142 | cg08043592 |
| 4308 | cg12678686 | cg11152884 | cg04944536 |
| 4309 | cg12680106 | cg10888242 | cg11703722 |
| 4310 | cg12681370 | cg10722267 | cg25591418 |
| 4311 | cg12681784 | cg10667102 | cg22644984 |
| 4312 | cg12686055 | cg10457079 | cg26784300 |
| 4313 | cg12688942 | cg10453420 | cg25661792 |
| 4314 | cg12692386 | cg10425513 | cg05188868 |
| 4315 | cg12692727 | cg10333594 | cg13910681 |
| 4316 | cg12694261 | cg10194844 | cg26607528 |
| 4317 | cg12702354 | cg10055950 | cg03049782 |
| 4318 | cg12705212 | cg10037894 | cg21450654 |
| 4319 | cg12708994 | cg09976716 | cg03571927 |
| 4320 | cg12710648 | cg09906780 | cg16580681 |
| 4321 | cg12725520 | cg09869286 | cg15126957 |
| 4322 | cg12727138 | cg09849774 | cg02625138 |
| 4323 | cg12727940 | cg09837656 | cg19603100 |
| 4324 | cg12728588 | cg09824023 | cg06198069 |
| 4325 | cg12728606 | cg09688726 | cg07486170 |
| 4326 | cg12729518 | cg09675604 | cg13038544 |
| 4327 | cg12732734 | cg09641077 | cg09326135 |
| 4328 | cg12734852 | cg09537038 | cg17649815 |
| 4329 | cg12736760 | cg09259595 | cg06926306 |
| 4330 | cg12737285 | cg09174690 | cg00969565 |
| 4331 | cg12742209 | cg09172973 | cg23709782 |
| 4332 | cg12743638 | cg09163745 | cg05498905 |
| 4333 | cg12744447 | cg09163478 | cg26886188 |
| 4334 | cg12747076 | cg09040552 | cg13039539 |
| 4335 | cg12762413 | cg09004351 | cg19144954 |
| 4336 | cg12764441 | cg08985282 | cg07503211 |
| 4337 | cg12766383 | cg08924374 | cg26367275 |
| 4338 | cg12774921 | cg08869160 | cg03315432 |
| 4339 | cg12778183 | cg08771923 | cg23908771 |
| 4340 | cg12785228 | cg08694923 | cg25418363 |
| 4341 | cg12786452 | cg08619515 | cg10805676 |
| 4342 | cg12787036 | cg08591538 | cg06313479 |
| 4343 | cg12790592 | cg08523978 | cg20173014 |

|      |            |            |            |
|------|------------|------------|------------|
| 4344 | cg12796332 | cg08510718 | cg23632333 |
| 4345 | cg12797609 | cg08506026 | cg13810664 |
| 4346 | cg12799862 | cg08384155 | cg09996971 |
| 4347 | cg12806353 | cg08334780 | cg04910179 |
| 4348 | cg12806728 | cg07925587 | cg14715030 |
| 4349 | cg12817154 | cg07733800 | cg04195543 |
| 4350 | cg12817352 | cg07431229 | cg01872216 |
| 4351 | cg12819011 | cg07394799 | cg15892617 |
| 4352 | cg12822242 | cg07265549 | cg02855309 |
| 4353 | cg12832282 | cg07261940 | cg27522078 |
| 4354 | cg12832565 | cg07146723 | cg11069071 |
| 4355 | cg12832726 | cg07129714 | cg01801191 |
| 4356 | cg12835599 | cg07109788 | cg02780210 |
| 4357 | cg12842409 | cg07104086 | cg00484122 |
| 4358 | cg12847536 | cg07097374 | cg00134602 |
| 4359 | cg12855331 | cg07051221 | cg11135937 |
| 4360 | cg12856760 | cg07046047 | cg22022181 |
| 4361 | cg12860109 | cg07012725 | cg00750074 |
| 4362 | cg12865939 | cg06984255 | cg26765599 |
| 4363 | cg12866104 | cg06914693 | cg26105283 |
| 4364 | cg12866859 | cg06786153 | cg03058664 |
| 4365 | cg12887832 | cg06754496 | cg17176209 |
| 4366 | cg12900489 | cg06753918 | cg07498879 |
| 4367 | cg12901038 | cg06741896 | cg03765423 |
| 4368 | cg12901650 | cg06656553 | cg25045972 |
| 4369 | cg12905673 | cg06547766 | cg03063946 |
| 4370 | cg12914733 | cg06518233 | cg18817459 |
| 4371 | cg12921473 | cg06506523 | cg13799838 |
| 4372 | cg12927785 | cg06485166 | cg03434029 |
| 4373 | cg12936779 | cg06422947 | cg16383573 |
| 4374 | cg12938917 | cg06372475 | cg18142262 |
| 4375 | cg12944530 | cg06208229 | cg24100115 |
| 4376 | cg12948116 | cg06096901 | cg12210305 |
| 4377 | cg12948543 | cg05978010 | cg09920043 |
| 4378 | cg12955277 | cg05945030 | cg27469606 |
| 4379 | cg12964187 | cg05724271 | cg00950038 |
| 4380 | cg12971523 | cg05658807 | cg09371084 |
| 4381 | cg12987059 | cg05591701 | cg14553765 |
| 4382 | cg12995933 | cg05498905 | cg11717552 |
| 4383 | cg12999366 | cg05369142 | cg17367836 |
| 4384 | cg13008252 | cg05330056 | cg14156441 |
| 4385 | cg13028113 | cg05303899 | cg13215078 |
| 4386 | cg13029400 | cg05286252 | cg18689614 |
| 4387 | cg13036546 | cg05274056 | cg06390613 |
| 4388 | cg13038544 | cg05229528 | cg18568570 |
| 4389 | cg13039539 | cg05218696 | cg18018990 |
| 4390 | cg13048437 | cg05179396 | cg08929612 |
| 4391 | cg13050716 | cg05069728 | cg05112986 |
| 4392 | cg13054419 | cg05065603 | cg02588098 |
| 4393 | cg13054523 | cg05057834 | cg19382919 |
| 4394 | cg13055385 | cg05040210 | cg17550566 |
| 4395 | cg13058457 | cg04929165 | cg18857588 |
| 4396 | cg13061648 | cg04902542 | cg07205670 |

|      |            |            |            |
|------|------------|------------|------------|
| 4397 | cg13063335 | cg04854911 | cg14470121 |
| 4398 | cg13066703 | cg04629141 | cg00366037 |
| 4399 | cg13068653 | cg04607323 | cg18532070 |
| 4400 | cg13070650 | cg04568492 | cg05384450 |
| 4401 | cg13079633 | cg04273604 | cg08843756 |
| 4402 | cg13080151 | cg04254540 | cg04216070 |
| 4403 | cg13086402 | cg04186815 | cg14129169 |
| 4404 | cg13089599 | cg04003615 | cg22957135 |
| 4405 | cg13089661 | cg03789088 | cg11400707 |
| 4406 | cg13093285 | cg03666500 | cg07850832 |
| 4407 | cg13096278 | cg03640215 | cg02212339 |
| 4408 | cg13099139 | cg03591954 | cg26016985 |
| 4409 | cg13099829 | cg03550233 | cg18862502 |
| 4410 | cg13105904 | cg03545972 | cg01283625 |
| 4411 | cg13107973 | cg03515290 | cg20256649 |
| 4412 | cg13109865 | cg03498175 | cg21026566 |
| 4413 | cg13115424 | cg03307425 | cg04536844 |
| 4414 | cg13116061 | cg03091010 | cg26891661 |
| 4415 | cg13119578 | cg03082830 | cg18226382 |
| 4416 | cg13129380 | cg03077492 | cg14331609 |
| 4417 | cg13135376 | cg03068497 | cg04679114 |
| 4418 | cg13139630 | cg02998240 | cg09406921 |
| 4419 | cg13148544 | cg02926160 | cg16642938 |
| 4420 | cg13149996 | cg02873783 | cg05196820 |
| 4421 | cg13151645 | cg02844593 | cg04885333 |
| 4422 | cg13153540 | cg02825527 | cg00934066 |
| 4423 | cg13153796 | cg02800817 | cg06898502 |
| 4424 | cg13154622 | cg02573234 | cg09790512 |
| 4425 | cg13162609 | cg02570643 | cg21406967 |
| 4426 | cg13165390 | cg02563156 | cg22490722 |
| 4427 | cg13165992 | cg02486181 | cg06036236 |
| 4428 | cg13169796 | cg02461114 | cg07875385 |
| 4429 | cg13171107 | cg02363969 | cg14011387 |
| 4430 | cg13171643 | cg02250553 | cg01618851 |
| 4431 | cg13175060 | cg02138124 | cg23873200 |
| 4432 | cg13177873 | cg02083559 | cg07506407 |
| 4433 | cg13189671 | cg02066343 | cg24276624 |
| 4434 | cg13190879 | cg01953240 | cg16776331 |
| 4435 | cg13200640 | cg01870976 | cg09258509 |
| 4436 | cg13206932 | cg01828733 | cg03970032 |
| 4437 | cg13207250 | cg01667978 | cg25588387 |
| 4438 | cg13210470 | cg01558195 | cg22686523 |
| 4439 | cg13210578 | cg01553866 | cg10333594 |
| 4440 | cg13222945 | cg01543307 | cg16920538 |
| 4441 | cg13223682 | cg01443467 | cg27073349 |
| 4442 | cg13225881 | cg01369033 | cg08883485 |
| 4443 | cg13236409 | cg01306662 | cg06436667 |
| 4444 | cg13248406 | cg01274028 | cg15720017 |
| 4445 | cg13251842 | cg01094351 | cg17505642 |
| 4446 | cg13263472 | cg01088579 | cg23114772 |
| 4447 | cg13264394 | cg00989505 | cg03589898 |
| 4448 | cg13269555 | cg00938266 | cg14050395 |
| 4449 | cg13274014 | cg00934066 | cg23844904 |

|      |            |            |            |
|------|------------|------------|------------|
| 4450 | cg13278004 | cg00892999 | cg03882967 |
| 4451 | cg13278105 | cg00718831 | cg26434328 |
| 4452 | cg13282594 | cg00713253 | cg01069043 |
| 4453 | cg13297120 | cg00606396 | cg13701991 |
| 4454 | cg13298379 | cg00604356 | cg04529785 |
| 4455 | cg13319468 | cg00595472 | cg20785796 |
| 4456 | cg13320257 | cg00442220 | cg01930924 |
| 4457 | cg13332142 | cg00405824 | cg08325885 |
| 4458 | cg13348246 | cg00360324 | cg04847478 |
| 4459 | cg13352836 | cg00299943 | cg18253910 |
| 4460 | cg13358061 | cg00275503 | cg26426564 |
| 4461 | cg13360638 | cg00236766 | cg04030444 |
| 4462 | cg13369099 | cg00149708 | cg13972711 |
| 4463 | cg13374528 | cg00147216 | cg23989757 |
| 4464 | cg13377839 | cg00017461 | cg00757391 |
| 4465 | cg13378789 | cg27641072 | cg25086418 |
| 4466 | cg13378934 | cg27631766 | cg19713140 |
| 4467 | cg13381243 | cg27554156 | cg00676360 |
| 4468 | cg13383819 | cg27511289 | cg13685294 |
| 4469 | cg13390372 | cg27485845 | cg16288579 |
| 4470 | cg13393917 | cg27470978 | cg21585138 |
| 4471 | cg13397568 | cg27294008 | cg10738865 |
| 4472 | cg13400018 | cg27228210 | cg21031345 |
| 4473 | cg13402847 | cg27227317 | cg09489567 |
| 4474 | cg13408795 | cg27025137 | cg27540799 |
| 4475 | cg13409409 | cg27004760 | cg03785456 |
| 4476 | cg13411951 | cg26974441 | cg03316628 |
| 4477 | cg13420004 | cg26769720 | cg22436253 |
| 4478 | cg13420647 | cg26765599 | cg04919234 |
| 4479 | cg13422164 | cg26757820 | cg13378934 |
| 4480 | cg13425135 | cg26690672 | cg03050096 |
| 4481 | cg13429555 | cg26661623 | cg18259342 |
| 4482 | cg13433644 | cg26510473 | cg21945949 |
| 4483 | cg13434216 | cg26499286 | cg05730150 |
| 4484 | cg13441142 | cg26463171 | cg13620881 |
| 4485 | cg13444374 | cg26426334 | cg13980079 |
| 4486 | cg13446070 | cg26328589 | cg26529655 |
| 4487 | cg13447099 | cg26309261 | cg14473030 |
| 4488 | cg13447933 | cg26289871 | cg09163745 |
| 4489 | cg13453203 | cg26281621 | cg19769521 |
| 4490 | cg13455439 | cg26181840 | cg13904806 |
| 4491 | cg13456321 | cg26171489 | cg09391399 |
| 4492 | cg13457217 | cg26164879 | cg25114693 |
| 4493 | cg13458561 | cg26147269 | cg00147850 |
| 4494 | cg13461247 | cg25998584 | cg13927454 |
| 4495 | cg13461718 | cg25984524 | cg07795082 |
| 4496 | cg13464157 | cg25887811 | cg23755969 |
| 4497 | cg13467292 | cg25841625 | cg22908423 |
| 4498 | cg13470557 | cg25785495 | cg00872170 |
| 4499 | cg13471336 | cg25780982 | cg07876450 |
| 4500 | cg13472900 | cg25763426 | cg10208609 |
| 4501 | cg13473184 | cg25754933 | cg05736906 |
| 4502 | cg13475822 | cg25730564 | cg27228210 |

|      |            |            |            |
|------|------------|------------|------------|
| 4503 | cg13476204 | cg25650076 | cg23300494 |
| 4504 | cg13477354 | cg25600823 | cg27134342 |
| 4505 | cg13483248 | cg25567021 | cg13062396 |
| 4506 | cg13488013 | cg25559625 | cg27009448 |
| 4507 | cg13488220 | cg25236277 | cg08091706 |
| 4508 | cg13488851 | cg25161092 | cg15422033 |
| 4509 | cg13490227 | cg25154482 | cg00755287 |
| 4510 | cg13491731 | cg25122824 | cg01617074 |
| 4511 | cg13495850 | cg25114693 | cg16144562 |
| 4512 | cg13496979 | cg25011577 | cg20808227 |
| 4513 | cg13499600 | cg25010788 | cg03800922 |
| 4514 | cg13499923 | cg24998879 | cg26796443 |
| 4515 | cg13500797 | cg24928546 | cg16004738 |
| 4516 | cg13508949 | cg24902250 | cg15012161 |
| 4517 | cg13509456 | cg24844449 | cg13369099 |
| 4518 | cg13514824 | cg24825937 | cg14092259 |
| 4519 | cg13515351 | cg24730224 | cg00454770 |
| 4520 | cg13520715 | cg24728456 | cg00624949 |
| 4521 | cg13521002 | cg24628866 | cg15656769 |
| 4522 | cg13521018 | cg24429081 | cg13915179 |
| 4523 | cg13522118 | cg24407065 | cg24407065 |
| 4524 | cg13525067 | cg24403487 | cg26737223 |
| 4525 | cg13530474 | cg24118850 | cg03840920 |
| 4526 | cg13533142 | cg24044501 | cg22516162 |
| 4527 | cg13537940 | cg23834427 | cg05327192 |
| 4528 | cg13542073 | cg23780635 | cg15980914 |
| 4529 | cg13543915 | cg23755969 | cg18766468 |
| 4530 | cg13545717 | cg23726802 | cg02604211 |
| 4531 | cg13549638 | cg23632333 | cg06746774 |
| 4532 | cg13550401 | cg23466118 | cg24940138 |
| 4533 | cg13554136 | cg23464284 | cg14529170 |
| 4534 | cg13556624 | cg23439917 | cg19219672 |
| 4535 | cg13558912 | cg23372092 | cg19057916 |
| 4536 | cg13560612 | cg23280294 | cg14524553 |
| 4537 | cg13565718 | cg23192604 | cg10563645 |
| 4538 | cg13567403 | cg23171099 | cg16772023 |
| 4539 | cg13571319 | cg23127694 | cg26608486 |
| 4540 | cg13572069 | cg23108580 | cg03010561 |
| 4541 | cg13573036 | cg23053961 | cg25077823 |
| 4542 | cg13576994 | cg23046918 | cg04208466 |
| 4543 | cg13583088 | cg22916722 | cg01968002 |
| 4544 | cg13584383 | cg22845855 | cg06292891 |
| 4545 | cg13586038 | cg22819824 | cg00488575 |
| 4546 | cg13586696 | cg22799860 | cg17971649 |
| 4547 | cg13587802 | cg22748815 | cg13169796 |
| 4548 | cg13589431 | cg22679474 | cg21189146 |
| 4549 | cg13593436 | cg22546818 | cg03485217 |
| 4550 | cg13598881 | cg22539584 | cg06415302 |
| 4551 | cg13601605 | cg22451412 | cg12743638 |
| 4552 | cg13608684 | cg22442617 | cg19730379 |
| 4553 | cg13610622 | cg22323067 | cg02097309 |
| 4554 | cg13611006 | cg22305797 | cg11592677 |
| 4555 | cg13618372 | cg22222413 | cg20560906 |

|      |            |            |            |
|------|------------|------------|------------|
| 4556 | cg13618880 | cg22153312 | cg18888464 |
| 4557 | cg13618969 | cg22122013 | cg25221919 |
| 4558 | cg13626676 | cg22078934 | cg07077978 |
| 4559 | cg13629563 | cg22052672 | cg21176488 |
| 4560 | cg13630560 | cg22049753 | cg06584121 |
| 4561 | cg13630646 | cg22016731 | cg27491887 |
| 4562 | cg13634090 | cg21962953 | cg19532212 |
| 4563 | cg13636986 | cg21962025 | cg23820560 |
| 4564 | cg13637552 | cg21759907 | cg10352104 |
| 4565 | cg13639244 | cg21747549 | cg03229767 |
| 4566 | cg13639866 | cg21667939 | cg05330056 |
| 4567 | cg13642149 | cg21616243 | cg13565718 |
| 4568 | cg13642849 | cg21437521 | cg10759972 |
| 4569 | cg13643040 | cg21385606 | cg13846358 |
| 4570 | cg13653963 | cg21183664 | cg10223066 |
| 4571 | cg13655570 | cg21057429 | cg24297835 |
| 4572 | cg13657004 | cg21040069 | cg14204266 |
| 4573 | cg13657511 | cg20849855 | cg13608684 |
| 4574 | cg13657981 | cg20805475 | cg21618273 |
| 4575 | cg13658093 | cg20798249 | cg07068045 |
| 4576 | cg13662225 | cg20667709 | cg03029255 |
| 4577 | cg13662628 | cg20650515 | cg02633600 |
| 4578 | cg13663738 | cg20593887 | cg00392155 |
| 4579 | cg13668823 | cg20547131 | cg14865516 |
| 4580 | cg13672348 | cg20544406 | cg21015266 |
| 4581 | cg13675389 | cg20528338 | cg15975598 |
| 4582 | cg13676538 | cg20519665 | cg02613380 |
| 4583 | cg13680188 | cg20513080 | cg11088489 |
| 4584 | cg13683219 | cg20370991 | cg05073386 |
| 4585 | cg13685294 | cg20300651 | cg24517989 |
| 4586 | cg13691622 | cg20099458 | cg05223346 |
| 4587 | cg13694343 | cg20060759 | cg14610776 |
| 4588 | cg13700912 | cg19789753 | cg21400851 |
| 4589 | cg13706365 | cg19784198 | cg01870865 |
| 4590 | cg13707189 | cg19750606 | cg26214074 |
| 4591 | cg13708635 | cg19702383 | cg11848157 |
| 4592 | cg13708908 | cg19646759 | cg09078622 |
| 4593 | cg13710553 | cg19640166 | cg14095283 |
| 4594 | cg13716849 | cg19638572 | cg17825194 |
| 4595 | cg13721589 | cg19577054 | cg02607544 |
| 4596 | cg13721644 | cg19553402 | cg27533454 |
| 4597 | cg13724379 | cg19549465 | cg04904609 |
| 4598 | cg13724812 | cg19532212 | cg01350190 |
| 4599 | cg13726456 | cg19375196 | cg25492112 |
| 4600 | cg13727957 | cg19372504 | cg14023774 |
| 4601 | cg13728069 | cg19354017 | cg14644865 |
| 4602 | cg13728131 | cg19284767 | cg06895946 |
| 4603 | cg13730600 | cg19182279 | cg09861034 |
| 4604 | cg13731108 | cg18940830 | cg00092644 |
| 4605 | cg13731636 | cg18856214 | cg05390712 |
| 4606 | cg13734860 | cg18758281 | cg00042325 |
| 4607 | cg13736131 | cg18703721 | cg23128056 |
| 4608 | cg13744954 | cg18698681 | cg01835489 |

|      |            |            |            |
|------|------------|------------|------------|
| 4609 | cg13747145 | cg18690282 | cg17468543 |
| 4610 | cg13747876 | cg18302629 | cg03140766 |
| 4611 | cg13753460 | cg18252102 | cg26551200 |
| 4612 | cg13753526 | cg18207099 | cg24773418 |
| 4613 | cg13758724 | cg18048309 | cg15516314 |
| 4614 | cg13763232 | cg18034859 | cg00352652 |
| 4615 | cg13763482 | cg18011099 | cg02015219 |
| 4616 | cg13765417 | cg17854297 | cg20745684 |
| 4617 | cg13774184 | cg17849972 | cg15170442 |
| 4618 | cg13774342 | cg17842918 | cg03101492 |
| 4619 | cg13775299 | cg17836842 | cg20019410 |
| 4620 | cg13782615 | cg17793608 | cg18153137 |
| 4621 | cg13784276 | cg17470627 | cg00681103 |
| 4622 | cg13786171 | cg17434577 | cg08636203 |
| 4623 | cg13793145 | cg17385318 | cg12729518 |
| 4624 | cg13794839 | cg17329004 | cg00869989 |
| 4625 | cg13798270 | cg17285883 | cg17099569 |
| 4626 | cg13798679 | cg17181336 | cg05631399 |
| 4627 | cg13799838 | cg17027476 | cg13589431 |
| 4628 | cg13800349 | cg17017404 | cg18763720 |
| 4629 | cg13808180 | cg16936094 | cg02633363 |
| 4630 | cg13808641 | cg16885557 | cg07051221 |
| 4631 | cg13808936 | cg16812626 | cg19078853 |
| 4632 | cg13810664 | cg16582732 | cg20048529 |
| 4633 | cg13815311 | cg16550656 | cg08007899 |
| 4634 | cg13817905 | cg16474791 | cg13888853 |
| 4635 | cg13818316 | cg16465939 | cg17429870 |
| 4636 | cg13821008 | cg16446824 | cg16074271 |
| 4637 | cg13821287 | cg16411103 | cg23945793 |
| 4638 | cg13823144 | cg16395892 | cg00861010 |
| 4639 | cg13827597 | cg16391347 | cg10511902 |
| 4640 | cg13832457 | cg16359657 | cg17241937 |
| 4641 | cg13836318 | cg16204524 | cg21492137 |
| 4642 | cg13838713 | cg16151538 | cg12250561 |
| 4643 | cg13842262 | cg16139912 | cg15373257 |
| 4644 | cg13849495 | cg16077055 | cg12072024 |
| 4645 | cg13849999 | cg16004738 | cg20441046 |
| 4646 | cg13850871 | cg15974867 | cg13784276 |
| 4647 | cg13852730 | cg15862380 | cg10119288 |
| 4648 | cg13856126 | cg15834460 | cg01228193 |
| 4649 | cg13857210 | cg15587041 | cg23719367 |
| 4650 | cg13857933 | cg15577180 | cg05692420 |
| 4651 | cg13858803 | cg15532942 | cg22638977 |
| 4652 | cg13860981 | cg15424477 | cg17853850 |
| 4653 | cg13864546 | cg15422033 | cg11929154 |
| 4654 | cg13867915 | cg15346286 | cg10311315 |
| 4655 | cg13871900 | cg15275017 | cg13063335 |
| 4656 | cg13877452 | cg15230883 | cg12469964 |
| 4657 | cg13877974 | cg15161854 | cg02003612 |
| 4658 | cg13881619 | cg15065169 | cg18027683 |
| 4659 | cg13885965 | cg15028507 | cg22433862 |
| 4660 | cg13888853 | cg15022671 | cg25595641 |
| 4661 | cg13904806 | cg14920846 | cg26564172 |



|      |            |            |            |
|------|------------|------------|------------|
| 4662 | cg13908988 | cg14781242 | cg03286774 |
| 4663 | cg13910681 | cg14780990 | cg07464578 |
| 4664 | cg13915179 | cg14764357 | cg00290626 |
| 4665 | cg13916835 | cg14734994 | cg16106903 |
| 4666 | cg13916961 | cg14584535 | cg25134701 |
| 4667 | cg13919369 | cg14574066 | cg24064506 |
| 4668 | cg13920768 | cg14565408 | cg23711760 |
| 4669 | cg13924326 | cg14547067 | cg16030972 |
| 4670 | cg13927454 | cg14529170 | cg24723883 |
| 4671 | cg13931531 | cg14414154 | cg19399165 |
| 4672 | cg13933043 | cg14342817 | cg27177296 |
| 4673 | cg13936383 | cg14328115 | cg20967819 |
| 4674 | cg13940218 | cg14313576 | cg01239666 |
| 4675 | cg13943333 | cg14311523 | cg05682319 |
| 4676 | cg13947385 | cg14290705 | cg10623198 |
| 4677 | cg13948857 | cg14162011 | cg14480449 |
| 4678 | cg13948956 | cg14096074 | cg25815219 |
| 4679 | cg13953458 | cg14050395 | cg19313353 |
| 4680 | cg13956443 | cg14044465 | cg22083335 |
| 4681 | cg13957538 | cg14037937 | cg02462933 |
| 4682 | cg13962153 | cg14037250 | cg06617528 |
| 4683 | cg13964068 | cg14021880 | cg17208278 |
| 4684 | cg13972711 | cg13948857 | cg07027613 |
| 4685 | cg13973594 | cg13936383 | cg01004063 |
| 4686 | cg13977320 | cg13794839 | cg10917602 |
| 4687 | cg13980079 | cg13761321 | cg26171489 |
| 4688 | cg13981325 | cg13680188 | cg12799862 |
| 4689 | cg13982956 | cg13676538 | cg08823975 |
| 4690 | cg13991631 | cg13637552 | cg14100888 |
| 4691 | cg13994897 | cg13624631 | cg19901381 |
| 4692 | cg13996750 | cg13550401 | cg26668872 |
| 4693 | cg14001518 | cg13431342 | cg22788065 |
| 4694 | cg14001914 | cg13428516 | cg16269144 |
| 4695 | cg14003211 | cg13200640 | cg11589139 |
| 4696 | cg14005246 | cg12999366 | cg27336068 |
| 4697 | cg14010305 | cg12936779 | cg04873169 |
| 4698 | cg14010805 | cg12865939 | cg17670999 |
| 4699 | cg14011387 | cg12856760 | cg18833140 |
| 4700 | cg14016236 | cg12835599 | cg13515351 |
| 4701 | cg14016879 | cg12785228 | cg23989207 |
| 4702 | cg14021880 | cg12725520 | cg05202424 |
| 4703 | cg14023774 | cg12694261 | cg24787929 |
| 4704 | cg14024328 | cg12669271 | cg22762745 |
| 4705 | cg14025149 | cg12657297 | cg13170807 |
| 4706 | cg14030593 | cg12579684 | cg08741843 |
| 4707 | cg14035238 | cg12551582 | cg07937803 |
| 4708 | cg14037250 | cg12397802 | cg06546521 |
| 4709 | cg14037652 | cg12351906 | cg04360519 |
| 4710 | cg14037937 | cg12232388 | cg27579131 |
| 4711 | cg14041194 | cg12178980 | cg05846044 |
| 4712 | cg14044465 | cg12153709 | cg15813460 |
| 4713 | cg14050395 | cg11952493 | cg11706790 |
| 4714 | cg14051367 | cg11873161 | cg05303899 |

|      |            |            |            |
|------|------------|------------|------------|
| 4715 | cg14055379 | cg11717552 | cg23262213 |
| 4716 | cg14058027 | cg11628880 | cg25242498 |
| 4717 | cg14059665 | cg11547122 | cg15895197 |
| 4718 | cg14059835 | cg11517528 | cg27483571 |
| 4719 | cg14062119 | cg11490961 | cg11030811 |
| 4720 | cg14062899 | cg11459133 | cg02998075 |
| 4721 | cg14064268 | cg11285912 | cg06899970 |
| 4722 | cg14070108 | cg11258489 | cg04349985 |
| 4723 | cg14074351 | cg11199862 | cg12598178 |
| 4724 | cg14078730 | cg11037787 | cg19418951 |
| 4725 | cg14082061 | cg10899681 | cg02150714 |
| 4726 | cg14087401 | cg10890199 | cg21080655 |
| 4727 | cg14088181 | cg10812717 | cg23250795 |
| 4728 | cg14092259 | cg10762613 | cg11231069 |
| 4729 | cg14093018 | cg10714160 | cg03627931 |
| 4730 | cg14093663 | cg10617739 | cg05409945 |
| 4731 | cg14096042 | cg10580341 | cg10937494 |
| 4732 | cg14100888 | cg10518527 | cg09198360 |
| 4733 | cg14101193 | cg10512408 | cg25028855 |
| 4734 | cg14101687 | cg10498921 | cg14329059 |
| 4735 | cg14102880 | cg10439859 | cg09255505 |
| 4736 | cg14104252 | cg10335736 | cg22247495 |
| 4737 | cg14113353 | cg10278394 | cg20826610 |
| 4738 | cg14114546 | cg10248100 | cg06931444 |
| 4739 | cg14117392 | cg10227280 | cg08970648 |
| 4740 | cg14118424 | cg10102736 | cg14645880 |
| 4741 | cg14118946 | cg10063407 | cg10960375 |
| 4742 | cg14119680 | cg10023624 | cg07295362 |
| 4743 | cg14125542 | cg10009207 | cg14304073 |
| 4744 | cg14126884 | cg09911521 | cg16989380 |
| 4745 | cg14127396 | cg09896120 | cg09519954 |
| 4746 | cg14132388 | cg09890339 | cg24528693 |
| 4747 | cg14136214 | cg09868556 | cg00373245 |
| 4748 | cg14136781 | cg09796786 | cg08613794 |
| 4749 | cg14140717 | cg09745791 | cg21105175 |
| 4750 | cg14143441 | cg09674500 | cg26648465 |
| 4751 | cg14144513 | cg09526129 | cg09228051 |
| 4752 | cg14149492 | cg09473315 | cg24900927 |
| 4753 | cg14156441 | cg09437283 | cg22920258 |
| 4754 | cg14156650 | cg09267483 | cg18482303 |
| 4755 | cg14159036 | cg09126859 | cg09248660 |
| 4756 | cg14162011 | cg09118048 | cg08767627 |
| 4757 | cg14165633 | cg09115960 | cg09407273 |
| 4758 | cg14166377 | cg09100373 | cg26423824 |
| 4759 | cg14168733 | cg09078622 | cg10218733 |
| 4760 | cg14175330 | cg09029046 | cg24893073 |
| 4761 | cg14178043 | cg09018739 | cg10472263 |
| 4762 | cg14178294 | cg08970011 | cg03379681 |
| 4763 | cg14189391 | cg08910524 | cg22020227 |
| 4764 | cg14190128 | cg08860136 | cg06115826 |
| 4765 | cg14190344 | cg08749443 | cg13309415 |
| 4766 | cg14195992 | cg08687995 | cg12011299 |
| 4767 | cg14199827 | cg08544606 | cg13639244 |

|      |            |            |            |
|------|------------|------------|------------|
| 4768 | cg14201387 | cg08409074 | cg04186815 |
| 4769 | cg14201946 | cg08259083 | cg27396760 |
| 4770 | cg14202146 | cg08097359 | cg07178379 |
| 4771 | cg14204738 | cg08038054 | cg24220178 |
| 4772 | cg14206983 | cg07899389 | cg15504666 |
| 4773 | cg14208133 | cg07866001 | cg10827094 |
| 4774 | cg14210001 | cg07828612 | cg14227460 |
| 4775 | cg14210790 | cg07741192 | cg25555068 |
| 4776 | cg14213430 | cg07536018 | cg14149492 |
| 4777 | cg14217074 | cg07483266 | cg04968127 |
| 4778 | cg14218838 | cg07475178 | cg21730805 |
| 4779 | cg14219236 | cg07463059 | cg04015687 |
| 4780 | cg14227418 | cg07438999 | cg14715383 |
| 4781 | cg14227460 | cg07416344 | cg01483459 |
| 4782 | cg14228788 | cg07284476 | cg12129983 |
| 4783 | cg14234732 | cg07283859 | cg07146723 |
| 4784 | cg14239346 | cg07165066 | cg13639866 |
| 4785 | cg14242936 | cg07015803 | cg27410136 |
| 4786 | cg14244360 | cg06924233 | cg20918463 |
| 4787 | cg14244878 | cg06846976 | cg09982918 |
| 4788 | cg14249876 | cg06840243 | cg16998564 |
| 4789 | cg14260162 | cg06719042 | cg04838832 |
| 4790 | cg14262433 | cg06671298 | cg24059075 |
| 4791 | cg14264773 | cg06616905 | cg20776543 |
| 4792 | cg14264901 | cg06604690 | cg00512280 |
| 4793 | cg14266952 | cg06599914 | cg00949635 |
| 4794 | cg14272573 | cg06584121 | cg14602839 |
| 4795 | cg14274896 | cg06436667 | cg10508317 |
| 4796 | cg14281591 | cg06419732 | cg04479713 |
| 4797 | cg14282937 | cg06385449 | cg24092282 |
| 4798 | cg14285365 | cg06379876 | cg12569216 |
| 4799 | cg14286546 | cg06344576 | cg14337655 |
| 4800 | cg14287742 | cg06297857 | cg15033036 |
| 4801 | cg14290705 | cg06186808 | cg04353106 |
| 4802 | cg14294646 | cg06124434 | cg08565675 |
| 4803 | cg14297546 | cg06104859 | cg14462432 |
| 4804 | cg14304073 | cg06008803 | cg10898310 |
| 4805 | cg14311523 | cg05988219 | cg27470978 |
| 4806 | cg14312334 | cg05970317 | cg09276451 |
| 4807 | cg14313184 | cg05821186 | cg13537008 |
| 4808 | cg14313576 | cg05767015 | cg03798162 |
| 4809 | cg14317513 | cg05760053 | cg15891850 |
| 4810 | cg14321412 | cg05603553 | cg13129380 |
| 4811 | cg14321522 | cg05585379 | cg17226348 |
| 4812 | cg14323199 | cg05554592 | cg21304766 |
| 4813 | cg14325029 | cg05400196 | cg17348667 |
| 4814 | cg14326263 | cg05339403 | cg09569347 |
| 4815 | cg14326472 | cg05322217 | cg16265707 |
| 4816 | cg14328115 | cg05317605 | cg04930596 |
| 4817 | cg14328761 | cg05260236 | cg21593030 |
| 4818 | cg14329059 | cg05223346 | cg14455781 |
| 4819 | cg14329833 | cg05139219 | cg05056653 |
| 4820 | cg14330078 | cg05134769 | cg22731981 |

|      |            |            |            |
|------|------------|------------|------------|
| 4821 | cg14331206 | cg05060686 | cg07481273 |
| 4822 | cg14331609 | cg05051734 | cg04990420 |
| 4823 | cg14334310 | cg04941831 | cg12161625 |
| 4824 | cg14337655 | cg04815334 | cg19594745 |
| 4825 | cg14337844 | cg04806664 | cg25552705 |
| 4826 | cg14340089 | cg04804094 | cg21397287 |
| 4827 | cg14342817 | cg04678901 | cg10005273 |
| 4828 | cg14350114 | cg04668631 | cg20147164 |
| 4829 | cg14351526 | cg04591732 | cg05750323 |
| 4830 | cg14359798 | cg04462561 | cg20476021 |
| 4831 | cg14373988 | cg04457069 | cg08362308 |
| 4832 | cg14377596 | cg04403423 | cg03851401 |
| 4833 | cg14389425 | cg04269351 | cg26240231 |
| 4834 | cg14393609 | cg04249706 | cg00206063 |
| 4835 | cg14401746 | cg04217556 | cg25838968 |
| 4836 | cg14403241 | cg04145522 | cg24705818 |
| 4837 | cg14405528 | cg04132177 | cg02493905 |
| 4838 | cg14406727 | cg04011474 | cg10520924 |
| 4839 | cg14410516 | cg03961998 | cg24420089 |
| 4840 | cg14412134 | cg03953506 | cg14204738 |
| 4841 | cg14413378 | cg03919694 | cg03861097 |
| 4842 | cg14414154 | cg03892631 | cg26328589 |
| 4843 | cg14419424 | cg03674127 | cg16023896 |
| 4844 | cg14420645 | cg03666300 | cg09848749 |
| 4845 | cg14425960 | cg03600605 | cg05479174 |
| 4846 | cg14426682 | cg03566001 | cg10063407 |
| 4847 | cg14428166 | cg03430597 | cg26547741 |
| 4848 | cg14429457 | cg03389789 | cg06694381 |
| 4849 | cg14438213 | cg03223959 | cg11612905 |
| 4850 | cg14444376 | cg03181618 | cg25285041 |
| 4851 | cg14455139 | cg03140766 | cg20227592 |
| 4852 | cg14455781 | cg03050096 | cg26871875 |
| 4853 | cg14461852 | cg02875487 | cg02240936 |
| 4854 | cg14462369 | cg02806704 | cg01519195 |
| 4855 | cg14467415 | cg02780210 | cg26784106 |
| 4856 | cg14469436 | cg02645302 | cg22822599 |
| 4857 | cg14470121 | cg02621481 | cg18653451 |
| 4858 | cg14473030 | cg02592525 | cg00358023 |
| 4859 | cg14473062 | cg02572552 | cg04650653 |
| 4860 | cg14474966 | cg02560388 | cg24831140 |
| 4861 | cg14475381 | cg02469916 | cg08281590 |
| 4862 | cg14476630 | cg02469356 | cg05030450 |
| 4863 | cg14480449 | cg02351425 | cg26332285 |
| 4864 | cg14482093 | cg02191483 | cg20595846 |
| 4865 | cg14487665 | cg02053092 | cg11436027 |
| 4866 | cg14497697 | cg01827633 | cg15181351 |
| 4867 | cg14500614 | cg01801191 | cg14455139 |
| 4868 | cg14502713 | cg01767116 | cg16734451 |
| 4869 | cg14505694 | cg01759870 | cg17843418 |
| 4870 | cg14506192 | cg01604401 | cg01443467 |
| 4871 | cg14514032 | cg01559356 | cg17112695 |
| 4872 | cg14516350 | cg01475325 | cg00232500 |
| 4873 | cg14519294 | cg01432405 | cg26840755 |

|      |            |            |            |
|------|------------|------------|------------|
| 4874 | cg14519777 | cg01139503 | cg13153796 |
| 4875 | cg14521421 | cg01038640 | cg00851981 |
| 4876 | cg14523734 | cg00977384 | cg23466118 |
| 4877 | cg14524553 | cg00951857 | cg04607844 |
| 4878 | cg14524975 | cg00947413 | cg26798772 |
| 4879 | cg14529170 | cg00937817 | cg10248148 |
| 4880 | cg14543285 | cg00937742 | cg06900843 |
| 4881 | cg14547067 | cg00863271 | cg25316172 |
| 4882 | cg14547599 | cg00785831 | cg02017718 |
| 4883 | cg14550212 | cg00742738 | cg08619651 |
| 4884 | cg14553895 | cg00738945 | cg00035074 |
| 4885 | cg14558880 | cg00607630 | cg16163535 |
| 4886 | cg14560240 | cg00594228 | cg18815879 |
| 4887 | cg14565408 | cg00585818 | cg01641136 |
| 4888 | cg14565439 | cg00569091 | cg00478851 |
| 4889 | cg14567593 | cg00549798 | cg22591040 |
| 4890 | cg14570652 | cg00548009 | cg05638821 |
| 4891 | cg14571537 | cg00500424 | cg09961689 |
| 4892 | cg14574066 | cg00478851 | cg10713589 |
| 4893 | cg14575741 | cg00454770 | cg15592324 |
| 4894 | cg14577373 | cg00452755 | cg23093846 |
| 4895 | cg14578363 | cg00359087 | cg25616055 |
| 4896 | cg14583686 | cg00356131 | cg06943835 |
| 4897 | cg14583973 | cg00308508 | cg23366234 |
| 4898 | cg14588828 | cg00232535 | cg22173510 |
| 4899 | cg14596589 | cg27637521 | cg24901995 |
| 4900 | cg14597504 | cg27613016 | cg22562003 |
| 4901 | cg14598025 | cg27503499 | cg18668813 |
| 4902 | cg14599015 | cg27491887 | cg25828334 |
| 4903 | cg14601444 | cg27396760 | cg11631173 |
| 4904 | cg14602839 | cg27382164 | cg02447556 |
| 4905 | cg14606082 | cg27381488 | cg27201457 |
| 4906 | cg14610776 | cg27365627 | cg06753827 |
| 4907 | cg14615152 | cg27320213 | cg01887374 |
| 4908 | cg14616881 | cg27295434 | cg14500614 |
| 4909 | cg14620138 | cg27233847 | cg24706522 |
| 4910 | cg14626525 | cg27201457 | cg17467243 |
| 4911 | cg14630692 | cg27160524 | cg16465939 |
| 4912 | cg14638315 | cg27082292 | cg18857655 |
| 4913 | cg14641266 | cg27070508 | cg03326128 |
| 4914 | cg14642045 | cg27053040 | cg08277216 |
| 4915 | cg14644865 | cg27011829 | cg25825612 |
| 4916 | cg14645880 | cg26978064 | cg04398282 |
| 4917 | cg14650228 | cg26965897 | cg13411951 |
| 4918 | cg14655044 | cg26934993 | cg10836809 |
| 4919 | cg14655905 | cg26919387 | cg02327654 |
| 4920 | cg14657458 | cg26890480 | cg14127396 |
| 4921 | cg14658346 | cg26889953 | cg08450122 |
| 4922 | cg14671764 | cg26828494 | cg11415402 |
| 4923 | cg14679558 | cg26778630 | cg21942532 |
| 4924 | cg14681171 | cg26564172 | cg25502179 |
| 4925 | cg14684068 | cg26434328 | cg14317513 |
| 4926 | cg14684166 | cg26405979 | cg12339425 |

|      |            |            |            |
|------|------------|------------|------------|
| 4927 | cg14692453 | cg26397391 | cg06436663 |
| 4928 | cg14692854 | cg26326208 | cg23876072 |
| 4929 | cg14699728 | cg26313976 | cg10550166 |
| 4930 | cg14700524 | cg25978487 | cg27011829 |
| 4931 | cg14701108 | cg25977879 | cg06710741 |
| 4932 | cg14701122 | cg25946646 | cg26160492 |
| 4933 | cg14706807 | cg25940447 | cg07530947 |
| 4934 | cg14711433 | cg25827936 | cg20733077 |
| 4935 | cg14715030 | cg25825970 | cg02214441 |
| 4936 | cg14715383 | cg25765315 | cg06868569 |
| 4937 | cg14732540 | cg25761326 | cg00446536 |
| 4938 | cg14734994 | cg25749254 | cg05185019 |
| 4939 | cg14738348 | cg25688583 | cg24293145 |
| 4940 | cg14741474 | cg25654695 | cg00887848 |
| 4941 | cg14742341 | cg25642974 | cg03068497 |
| 4942 | cg14744022 | cg25637473 | cg04254198 |
| 4943 | cg14747072 | cg25591106 | cg18313342 |
| 4944 | cg14753356 | cg25568745 | cg11101316 |
| 4945 | cg14758740 | cg25506288 | cg08110688 |
| 4946 | cg14758812 | cg25477334 | cg03244796 |
| 4947 | cg14763173 | cg25451660 | cg10319905 |
| 4948 | cg14764357 | cg25409944 | cg19375196 |
| 4949 | cg14772050 | cg25323005 | cg20781516 |
| 4950 | cg14777056 | cg25242498 | cg09334629 |
| 4951 | cg14778721 | cg25146042 | cg19561607 |
| 4952 | cg14780990 | cg25137314 | cg10997906 |
| 4953 | cg14781242 | cg25006254 | cg02193967 |
| 4954 | cg14782266 | cg24926689 | cg07622079 |
| 4955 | cg14785464 | cg24881255 | cg01390647 |
| 4956 | cg14788686 | cg24691835 | cg00187129 |
| 4957 | cg14789529 | cg24606594 | cg12417871 |
| 4958 | cg14790609 | cg24586870 | cg22040672 |
| 4959 | cg14811011 | cg24362347 | cg00184279 |
| 4960 | cg14817655 | cg24349804 | cg06857516 |
| 4961 | cg14820213 | cg24154271 | cg17700443 |
| 4962 | cg14826031 | cg24137511 | cg18553570 |
| 4963 | cg14829271 | cg24045498 | cg15225991 |
| 4964 | cg14830485 | cg24009250 | cg20699157 |
| 4965 | cg14833626 | cg23996800 | cg13630560 |
| 4966 | cg14835545 | cg23947450 | cg09246253 |
| 4967 | cg14839830 | cg23887746 | cg24760753 |
| 4968 | cg14841828 | cg23827284 | cg04034290 |
| 4969 | cg14842237 | cg23779478 | cg20118577 |
| 4970 | cg14864276 | cg23732483 | cg10859358 |
| 4971 | cg14870461 | cg23696210 | cg02975060 |
| 4972 | cg14870682 | cg23691781 | cg13808180 |
| 4973 | cg14875081 | cg23690480 | cg08242475 |
| 4974 | cg14875394 | cg23610994 | cg21500064 |
| 4975 | cg14878988 | cg23601586 | cg17783359 |
| 4976 | cg14879279 | cg23485307 | cg06259664 |
| 4977 | cg14879569 | cg23318523 | cg17343483 |
| 4978 | cg14884828 | cg23316807 | cg08665249 |
| 4979 | cg14899960 | cg23301979 | cg11092157 |

|      |            |            |            |
|------|------------|------------|------------|
| 4980 | cg14914440 | cg23299804 | cg22743617 |
| 4981 | cg14916108 | cg23244464 | cg20654462 |
| 4982 | cg14917100 | cg23100428 | cg27156542 |
| 4983 | cg14918743 | cg22998873 | cg00149708 |
| 4984 | cg14919455 | cg22932649 | cg13151645 |
| 4985 | cg14920846 | cg22908423 | cg06297857 |
| 4986 | cg14921326 | cg22414151 | cg21242663 |
| 4987 | cg14923274 | cg22343299 | cg00860425 |
| 4988 | cg14923398 | cg22257056 | cg16566899 |
| 4989 | cg14937059 | cg22150680 | cg08552446 |
| 4990 | cg14937228 | cg22118369 | cg05459650 |
| 4991 | cg14939096 | cg22097225 | cg03575245 |
| 4992 | cg14939765 | cg22020227 | cg13425135 |
| 4993 | cg14947411 | cg21942532 | cg15121364 |
| 4994 | cg14947466 | cg21845869 | cg12185975 |
| 4995 | cg14960869 | cg21840948 | cg27616751 |
| 4996 | cg14966074 | cg21837323 | cg11835806 |
| 4997 | cg14966346 | cg21740826 | cg10584300 |
| 4998 | cg14971998 | cg21613549 | cg04260307 |
| 4999 | cg14978242 | cg21611093 | cg15031106 |
| 5000 | cg14983540 | cg21574349 | cg27248741 |
| 5001 | cg14992217 | cg21549497 | cg12629008 |
| 5002 | cg14992771 | cg21544633 | cg18248273 |
| 5003 | cg14995235 | cg21450654 | cg17334762 |
| 5004 | cg15012161 | cg21422871 | cg19817882 |
| 5005 | cg15014006 | cg21400851 | cg26893743 |
| 5006 | cg15016233 | cg21185187 | cg21504064 |
| 5007 | cg15016481 | cg21133992 | cg20934096 |
| 5008 | cg15016624 | cg21006686 | cg27434984 |
| 5009 | cg15016740 | cg20910352 | cg26338030 |
| 5010 | cg15020964 | cg20785796 | cg05909553 |
| 5011 | cg15022671 | cg20745684 | cg12900489 |
| 5012 | cg15026277 | cg20741105 | cg16200325 |
| 5013 | cg15028232 | cg20731110 | cg04586928 |
| 5014 | cg15028507 | cg20567148 | cg25945499 |
| 5015 | cg15031106 | cg20566286 | cg22532194 |
| 5016 | cg15033036 | cg20524889 | cg15676677 |
| 5017 | cg15033511 | cg20390500 | cg09674368 |
| 5018 | cg15034300 | cg20383521 | cg12375903 |
| 5019 | cg15035360 | cg20300776 | cg26597727 |
| 5020 | cg15036118 | cg20193802 | cg01176823 |
| 5021 | cg15048900 | cg20080282 | cg07832950 |
| 5022 | cg15063355 | cg20076442 | cg26750188 |
| 5023 | cg15063366 | cg20051177 | cg22888023 |
| 5024 | cg15065169 | cg20027784 | cg20060759 |
| 5025 | cg15072038 | cg20008846 | cg00776208 |
| 5026 | cg15074047 | cg19991046 | cg09373983 |
| 5027 | cg15076811 | cg19879265 | cg25013838 |
| 5028 | cg15083845 | cg19771975 | cg23619577 |
| 5029 | cg15086474 | cg19761272 | cg21750915 |
| 5030 | cg15089181 | cg19622474 | cg23212751 |
| 5031 | cg15089272 | cg19577082 | cg11700356 |
| 5032 | cg15089806 | cg19529732 | cg14923274 |

|      |            |            |            |
|------|------------|------------|------------|
| 5033 | cg15104081 | cg19515081 | cg23818351 |
| 5034 | cg15111351 | cg19494591 | cg14780990 |
| 5035 | cg15117891 | cg19479935 | cg21560157 |
| 5036 | cg15121364 | cg19445044 | cg05899507 |
| 5037 | cg15121417 | cg19348272 | cg10893014 |
| 5038 | cg15126957 | cg19295314 | cg20297670 |
| 5039 | cg15127656 | cg19270309 | cg04804094 |
| 5040 | cg15128510 | cg19113668 | cg17010895 |
| 5041 | cg15141238 | cg18888464 | cg15111351 |
| 5042 | cg15142430 | cg18811860 | cg27378358 |
| 5043 | cg15155463 | cg18517266 | cg26720682 |
| 5044 | cg15161050 | cg18505837 | cg17214107 |
| 5045 | cg15162922 | cg18279126 | cg08866865 |
| 5046 | cg15164881 | cg18226382 | cg10519271 |
| 5047 | cg15168816 | cg18061711 | cg13119578 |
| 5048 | cg15170442 | cg18018990 | cg27143695 |
| 5049 | cg15171237 | cg17977723 | cg11753157 |
| 5050 | cg15175632 | cg17971649 | cg25167447 |
| 5051 | cg15188939 | cg17907628 | cg25975823 |
| 5052 | cg15209369 | cg17893426 | cg09695261 |
| 5053 | cg15214284 | cg17884766 | cg13274014 |
| 5054 | cg15225991 | cg17865371 | cg19120897 |
| 5055 | cg15228983 | cg17819085 | cg01201519 |
| 5056 | cg15230883 | cg17736336 | cg03244438 |
| 5057 | cg15231872 | cg17700633 | cg20329085 |
| 5058 | cg15232718 | cg17700443 | cg22999786 |
| 5059 | cg15241074 | cg17497965 | cg13618372 |
| 5060 | cg15247169 | cg17341136 | cg11189177 |
| 5061 | cg15249446 | cg17234201 | cg13332783 |
| 5062 | cg15250073 | cg17202706 | cg18795383 |
| 5063 | cg15259233 | cg17176209 | cg05218696 |
| 5064 | cg15260437 | cg17153432 | cg24768094 |
| 5065 | cg15262242 | cg16975812 | cg25650076 |
| 5066 | cg15264708 | cg16908123 | cg08732879 |
| 5067 | cg15264991 | cg16889721 | cg26127113 |
| 5068 | cg15267890 | cg16796135 | cg02289020 |
| 5069 | cg15269394 | cg16712866 | cg04530852 |
| 5070 | cg15275017 | cg16711983 | cg21238061 |
| 5071 | cg15277378 | cg16609966 | cg12905673 |
| 5072 | cg15283164 | cg16585619 | cg00718831 |
| 5073 | cg15299233 | cg16554164 | cg03420242 |
| 5074 | cg15302379 | cg16201762 | cg11897120 |
| 5075 | cg15318570 | cg15862394 | cg13821287 |
| 5076 | cg15322667 | cg15744108 | cg02402630 |
| 5077 | cg15329179 | cg15679098 | cg00677217 |
| 5078 | cg15335728 | cg15626112 | cg04009429 |
| 5079 | cg15336269 | cg15618758 | cg10507988 |
| 5080 | cg15342087 | cg15582126 | cg10288921 |
| 5081 | cg15352671 | cg15498121 | cg10714160 |
| 5082 | cg15354065 | cg15489196 | cg23400222 |
| 5083 | cg15355859 | cg15417249 | cg26218835 |
| 5084 | cg15363996 | cg15214284 | cg15755154 |
| 5085 | cg15364618 | cg15083845 | cg00061185 |



|      |            |            |            |
|------|------------|------------|------------|
| 5086 | cg15367698 | cg14820213 | cg22118416 |
| 5087 | cg15368455 | cg14732540 | cg13207250 |
| 5088 | cg15373257 | cg14715383 | cg04147875 |
| 5089 | cg15374133 | cg14655905 | cg11079426 |
| 5090 | cg15383141 | cg14620138 | cg10171557 |
| 5091 | cg15389749 | cg14567593 | cg25445431 |
| 5092 | cg15391531 | cg14480449 | cg13634090 |
| 5093 | cg15396800 | cg14474966 | cg19047283 |
| 5094 | cg15401523 | cg14360029 | cg04806664 |
| 5095 | cg15402232 | cg14351526 | cg20892492 |
| 5096 | cg15407257 | cg14325029 | cg05041061 |
| 5097 | cg15408497 | cg14312334 | cg16239826 |
| 5098 | cg15408640 | cg14227460 | cg24034465 |
| 5099 | cg15416179 | cg14195992 | cg16207263 |
| 5100 | cg15420720 | cg14165633 | cg26147269 |
| 5101 | cg15422033 | cg14156650 | cg08197880 |
| 5102 | cg15424477 | cg14088181 | cg13036546 |
| 5103 | cg15425427 | cg14082061 | cg17685579 |
| 5104 | cg15444149 | cg14011387 | cg13567403 |
| 5105 | cg15446884 | cg13984005 | cg10902107 |
| 5106 | cg15450139 | cg13916961 | cg24215635 |
| 5107 | cg15451258 | cg13818316 | cg24033503 |
| 5108 | cg15459715 | cg13795838 | cg09915232 |
| 5109 | cg15465367 | cg13730600 | cg03294704 |
| 5110 | cg15473017 | cg13728131 | cg25649889 |
| 5111 | cg15475080 | cg13706365 | cg07716287 |
| 5112 | cg15485665 | cg13691622 | cg06363129 |
| 5113 | cg15487498 | cg13630646 | cg21238609 |
| 5114 | cg15488570 | cg13488013 | cg17667773 |
| 5115 | cg15489196 | cg13461718 | cg14389425 |
| 5116 | cg15498121 | cg13411951 | cg19062489 |
| 5117 | cg15498306 | cg13377839 | cg25993608 |
| 5118 | cg15504666 | cg13309415 | cg00963675 |
| 5119 | cg15506281 | cg13177873 | cg21535761 |
| 5120 | cg15507500 | cg13165390 | cg02062816 |
| 5121 | cg15516314 | cg13119578 | cg02157454 |
| 5122 | cg15518113 | cg13063335 | cg01256365 |
| 5123 | cg15520941 | cg13062396 | cg18860847 |
| 5124 | cg15532236 | cg13003178 | cg26934759 |
| 5125 | cg15536489 | cg12901038 | cg07124859 |
| 5126 | cg15536947 | cg12846837 | cg21558509 |
| 5127 | cg15540341 | cg12842409 | cg21434355 |
| 5128 | cg15541630 | cg12766383 | cg14918743 |
| 5129 | cg15543534 | cg12734852 | cg04226952 |
| 5130 | cg15545942 | cg12708994 | cg22039204 |
| 5131 | cg15546071 | cg12705212 | cg01993468 |
| 5132 | cg15547344 | cg12595697 | cg15411034 |
| 5133 | cg15548656 | cg12555086 | cg13470557 |
| 5134 | cg15556723 | cg12250561 | cg11731626 |
| 5135 | cg15561453 | cg12143499 | cg02084214 |
| 5136 | cg15574810 | cg12129983 | cg05080811 |
| 5137 | cg15576082 | cg12119133 | cg03985415 |
| 5138 | cg15577180 | cg12071544 | cg06294856 |

|      |            |            |            |
|------|------------|------------|------------|
| 5139 | cg15582126 | cg12036877 | cg05070608 |
| 5140 | cg15582707 | cg11996592 | cg25390635 |
| 5141 | cg15587041 | cg11936817 | cg05995260 |
| 5142 | cg15592324 | cg11860238 | cg15629568 |
| 5143 | cg15598425 | cg11828741 | cg15616400 |
| 5144 | cg15600176 | cg11685391 | cg06753918 |
| 5145 | cg15603885 | cg11672338 | cg23566503 |
| 5146 | cg15613048 | cg11662712 | cg22371518 |
| 5147 | cg15616400 | cg11450827 | cg21573345 |
| 5148 | cg15617336 | cg11432630 | cg06856570 |
| 5149 | cg15617847 | cg11320499 | cg14469436 |
| 5150 | cg15618758 | cg11176525 | cg23760873 |
| 5151 | cg15626112 | cg11025609 | cg26133909 |
| 5152 | cg15627277 | cg10692363 | cg00977384 |
| 5153 | cg15627593 | cg10607485 | cg00260235 |
| 5154 | cg15629568 | cg10369955 | cg13610622 |
| 5155 | cg15632675 | cg10307940 | cg16694664 |
| 5156 | cg15633699 | cg10168009 | cg04132177 |
| 5157 | cg15636859 | cg10102102 | cg02226672 |
| 5158 | cg15637234 | cg09975093 | cg22805632 |
| 5159 | cg15637254 | cg09900084 | cg11124652 |
| 5160 | cg15639581 | cg09856367 | cg04911680 |
| 5161 | cg15646741 | cg09825670 | cg27178714 |
| 5162 | cg15656769 | cg09659803 | cg26867987 |
| 5163 | cg15657100 | cg09526469 | cg09218398 |
| 5164 | cg15658793 | cg09495643 | cg15576082 |
| 5165 | cg15661715 | cg09457490 | cg14272573 |
| 5166 | cg15676677 | cg09386073 | cg06863830 |
| 5167 | cg15678662 | cg09358961 | cg12855271 |
| 5168 | cg15679098 | cg09304617 | cg04665930 |
| 5169 | cg15684702 | cg09251291 | cg02495395 |
| 5170 | cg15686782 | cg09198283 | cg02958180 |
| 5171 | cg15693937 | cg09185884 | cg07561338 |
| 5172 | cg15702277 | cg09101894 | cg05294455 |
| 5173 | cg15709435 | cg09043524 | cg14262433 |
| 5174 | cg15712304 | cg08779777 | cg12778183 |
| 5175 | cg15715853 | cg08701134 | cg16067210 |
| 5176 | cg15720017 | cg08650647 | cg08625990 |
| 5177 | cg15726557 | cg08631328 | cg07483266 |
| 5178 | cg15744108 | cg08625996 | cg17034088 |
| 5179 | cg15755154 | cg08458637 | cg13573244 |
| 5180 | cg15756507 | cg08412188 | cg01460382 |
| 5181 | cg15765251 | cg08325885 | cg22666223 |
| 5182 | cg15770585 | cg08293102 | cg27049344 |
| 5183 | cg15772924 | cg08250738 | cg02762546 |
| 5184 | cg15777335 | cg08209934 | cg05623411 |
| 5185 | cg15802323 | cg08180831 | cg18809729 |
| 5186 | cg15806038 | cg08132525 | cg08005460 |
| 5187 | cg15813460 | cg08124923 | cg22528270 |
| 5188 | cg15815827 | cg08110688 | cg07979388 |
| 5189 | cg15816464 | cg08106635 | cg19658812 |
| 5190 | cg15817440 | cg08104310 | cg07036799 |
| 5191 | cg15819921 | cg08103691 | cg03778594 |

|      |            |            |            |
|------|------------|------------|------------|
| 5192 | cg15834460 | cg08070235 | cg21726593 |
| 5193 | cg15843262 | cg08044294 | cg21006686 |
| 5194 | cg15844895 | cg07844828 | cg27227317 |
| 5195 | cg15850851 | cg07793033 | cg16116632 |
| 5196 | cg15854022 | cg07740306 | cg24771349 |
| 5197 | cg15862380 | cg07586345 | cg04618903 |
| 5198 | cg15862394 | cg07560287 | cg16626731 |
| 5199 | cg15874302 | cg07505901 | cg00095326 |
| 5200 | cg15879620 | cg07498879 | cg14405528 |
| 5201 | cg15881332 | cg07363131 | cg24008544 |
| 5202 | cg15888569 | cg07353266 | cg25866889 |
| 5203 | cg15888693 | cg07290652 | cg01783960 |
| 5204 | cg15892617 | cg07275305 | cg02315513 |
| 5205 | cg15895197 | cg07262506 | cg14917100 |
| 5206 | cg15899800 | cg07217341 | cg13727957 |
| 5207 | cg15904939 | cg07115952 | cg06987369 |
| 5208 | cg15910594 | cg07108443 | cg26261873 |
| 5209 | cg15911948 | cg07070824 | cg17636986 |
| 5210 | cg15933120 | cg07068045 | cg21628927 |
| 5211 | cg15934607 | cg07054804 | cg19895894 |
| 5212 | cg15935860 | cg07041883 | cg23299804 |
| 5213 | cg15937073 | cg06943845 | cg25606046 |
| 5214 | cg15943602 | cg06900843 | cg12921473 |
| 5215 | cg15944060 | cg06899970 | cg02340818 |
| 5216 | cg15956469 | cg06887283 | cg10024484 |
| 5217 | cg15957394 | cg06826908 | cg22049753 |
| 5218 | cg15959893 | cg06807837 | cg25939647 |
| 5219 | cg15968604 | cg06752482 | cg17791936 |
| 5220 | cg15969277 | cg06746744 | cg15632675 |
| 5221 | cg15970457 | cg06632214 | cg12616177 |
| 5222 | cg15970890 | cg06617528 | cg07997682 |
| 5223 | cg15974867 | cg06597413 | cg14342817 |
| 5224 | cg15975598 | cg06562888 | cg08168529 |
| 5225 | cg15980914 | cg06537333 | cg12583325 |
| 5226 | cg15988204 | cg06351520 | cg02287325 |
| 5227 | cg15988734 | cg06292891 | cg07115952 |
| 5228 | cg15988812 | cg06290096 | cg06246999 |
| 5229 | cg15991082 | cg06275130 | cg15020964 |
| 5230 | cg16004738 | cg06167719 | cg15161854 |
| 5231 | cg16006963 | cg06085713 | cg03108347 |
| 5232 | cg16009311 | cg05977523 | cg17196713 |
| 5233 | cg16016960 | cg05894015 | cg06500727 |
| 5234 | cg16023122 | cg05888037 | cg00765705 |
| 5235 | cg16023896 | cg05718035 | cg23656110 |
| 5236 | cg16024937 | cg05670093 | cg15765251 |
| 5237 | cg16026212 | cg05638821 | cg09536516 |
| 5238 | cg16026813 | cg05469118 | cg22277106 |
| 5239 | cg16027775 | cg05324992 | cg09020697 |
| 5240 | cg16030878 | cg05270552 | cg03138206 |
| 5241 | cg16030972 | cg05194102 | cg07605062 |
| 5242 | cg16031980 | cg05145297 | cg02935024 |
| 5243 | cg16034562 | cg04945557 | cg20005923 |
| 5244 | cg16051954 | cg04904609 | cg17563229 |

|      |            |            |            |
|------|------------|------------|------------|
| 5245 | cg16052388 | cg04882759 | cg21925748 |
| 5246 | cg16071082 | cg04868238 | cg17285177 |
| 5247 | cg16071782 | cg04860563 | cg23143093 |
| 5248 | cg16073408 | cg04844977 | cg00271311 |
| 5249 | cg16075266 | cg04784315 | cg22019569 |
| 5250 | cg16077055 | cg04685302 | cg07449447 |
| 5251 | cg16078836 | cg04663956 | cg26915618 |
| 5252 | cg16078863 | cg04586928 | cg21906519 |
| 5253 | cg16081096 | cg04530852 | cg21464492 |
| 5254 | cg16081499 | cg04524477 | cg21483216 |
| 5255 | cg16084313 | cg04510807 | cg26797297 |
| 5256 | cg16089233 | cg04493177 | cg10357989 |
| 5257 | cg16092370 | cg04465834 | cg06711298 |
| 5258 | cg16102706 | cg04462774 | cg00286014 |
| 5259 | cg16102778 | cg04454664 | cg10667207 |
| 5260 | cg16106427 | cg04403415 | cg20140662 |
| 5261 | cg16106903 | cg04341806 | cg00594228 |
| 5262 | cg16114651 | cg04312967 | cg26019124 |
| 5263 | cg16116632 | cg04240456 | cg23005227 |
| 5264 | cg16117028 | cg04195543 | cg12054698 |
| 5265 | cg16125397 | cg04137490 | cg15844895 |
| 5266 | cg16126178 | cg04074404 | cg14331206 |
| 5267 | cg16133703 | cg04070601 | cg24970620 |
| 5268 | cg16139912 | cg04041283 | cg25971741 |
| 5269 | cg16142965 | cg03872934 | cg22916722 |
| 5270 | cg16144562 | cg03743074 | cg07123022 |
| 5271 | cg16145211 | cg03739877 | cg04655520 |
| 5272 | cg16151538 | cg03737788 | cg22169866 |
| 5273 | cg16161135 | cg03668470 | cg26660115 |
| 5274 | cg16163535 | cg03649353 | cg24482246 |
| 5275 | cg16163756 | cg03614132 | cg20495333 |
| 5276 | cg16167741 | cg03472610 | cg24706188 |
| 5277 | cg16168321 | cg03452625 | cg22958118 |
| 5278 | cg16172837 | cg03446062 | cg07521789 |
| 5279 | cg16174644 | cg03400491 | cg00322201 |
| 5280 | cg16175077 | cg03242880 | cg14764357 |
| 5281 | cg16183741 | cg03198029 | cg26365254 |
| 5282 | cg16184131 | cg03181382 | cg11010976 |
| 5283 | cg16185457 | cg03135948 | cg12499572 |
| 5284 | cg16195091 | cg03054026 | cg16344173 |
| 5285 | cg16200325 | cg02940164 | cg00286717 |
| 5286 | cg16201762 | cg02869364 | cg24647108 |
| 5287 | cg16204524 | cg02817932 | cg03582793 |
| 5288 | cg16207263 | cg02762546 | cg14311523 |
| 5289 | cg16212219 | cg02737507 | cg18330203 |
| 5290 | cg16213787 | cg02729303 | cg12025243 |
| 5291 | cg16221927 | cg02722657 | cg22472304 |
| 5292 | cg16222367 | cg02712546 | cg03736774 |
| 5293 | cg16222790 | cg02697979 | cg22563907 |
| 5294 | cg16223967 | cg02693127 | cg02821693 |
| 5295 | cg16232530 | cg02648939 | cg05662839 |
| 5296 | cg16234490 | cg02622601 | cg08559648 |
| 5297 | cg16236270 | cg02600978 | cg26068595 |

|      |            |            |            |
|------|------------|------------|------------|
| 5298 | cg16237297 | cg02569718 | cg26245697 |
| 5299 | cg16238993 | cg02517473 | cg18852515 |
| 5300 | cg16239826 | cg02384859 | cg24314474 |
| 5301 | cg16245035 | cg02272751 | cg08135904 |
| 5302 | cg16255804 | cg02196592 | cg10330187 |
| 5303 | cg16258545 | cg02165692 | cg04145522 |
| 5304 | cg16263152 | cg02119693 | cg14340089 |
| 5305 | cg16265707 | cg02113385 | cg12872329 |
| 5306 | cg16265932 | cg02060039 | cg18716503 |
| 5307 | cg16269144 | cg02048412 | cg24728456 |
| 5308 | cg16274890 | cg02008511 | cg11781564 |
| 5309 | cg16277922 | cg01959238 | cg26124719 |
| 5310 | cg16283362 | cg01914059 | cg12901038 |
| 5311 | cg16285424 | cg01859460 | cg22822048 |
| 5312 | cg16288579 | cg01810347 | cg11321921 |
| 5313 | cg16289101 | cg01794929 | cg13509456 |
| 5314 | cg16290996 | cg01758022 | cg09119967 |
| 5315 | cg16292933 | cg01676623 | cg10494703 |
| 5316 | cg16293569 | cg01553388 | cg07410188 |
| 5317 | cg16306083 | cg01501018 | cg26079864 |
| 5318 | cg16306870 | cg01481251 | cg04457069 |
| 5319 | cg16309127 | cg01456030 | cg09643151 |
| 5320 | cg16311946 | cg01428849 | cg17469039 |
| 5321 | cg16312872 | cg01411786 | cg02961196 |
| 5322 | cg16316042 | cg01403055 | cg20513080 |
| 5323 | cg16318412 | cg01343936 | cg09327804 |
| 5324 | cg16326073 | cg01298514 | cg04107939 |
| 5325 | cg16328007 | cg01297744 | cg22054793 |
| 5326 | cg16329509 | cg01239666 | cg12887832 |
| 5327 | cg16337430 | cg01153620 | cg17836842 |
| 5328 | cg16340152 | cg01063813 | cg00488716 |
| 5329 | cg16344173 | cg01063615 | cg15943602 |
| 5330 | cg16359657 | cg00941576 | cg20000539 |
| 5331 | cg16365663 | cg00869989 | cg20544097 |
| 5332 | cg16366639 | cg00863893 | cg11990296 |
| 5333 | cg16366809 | cg00776208 | cg09551019 |
| 5334 | cg16381321 | cg00706536 | cg17199010 |
| 5335 | cg16385941 | cg00701514 | cg02060434 |
| 5336 | cg16387467 | cg00675878 | cg23250528 |
| 5337 | cg16387532 | cg00656991 | cg02718078 |
| 5338 | cg16391182 | cg00585698 | cg06028151 |
| 5339 | cg16391347 | cg00550617 | cg19063768 |
| 5340 | cg16392729 | cg00547727 | cg05269678 |
| 5341 | cg16392860 | cg00488512 | cg19940729 |
| 5342 | cg16395892 | cg00358023 | cg03487040 |
| 5343 | cg16397629 | cg00314994 | cg22240998 |
| 5344 | cg16402415 | cg00270654 | cg22971402 |
| 5345 | cg16407998 | cg00175895 | cg15162922 |
| 5346 | cg16411103 | cg00059024 | cg03053456 |
| 5347 | cg16412000 | cg00035923 | cg07836226 |
| 5348 | cg16419526 | cg27643147 | cg06632821 |
| 5349 | cg16421359 | cg27572074 | cg03962809 |
| 5350 | cg16421653 | cg27533454 | cg05370136 |

|      |            |            |            |
|------|------------|------------|------------|
| 5351 | cg16422492 | cg27492839 | cg22370005 |
| 5352 | cg16425726 | cg27438218 | cg08934318 |
| 5353 | cg16427420 | cg27409974 | cg23316807 |
| 5354 | cg16436210 | cg27399753 | cg03284113 |
| 5355 | cg16442814 | cg27278961 | cg25007422 |
| 5356 | cg16446824 | cg27181295 | cg09646558 |
| 5357 | cg16452866 | cg27177296 | cg00513981 |
| 5358 | cg16453673 | cg27170206 | cg12604490 |
| 5359 | cg16461139 | cg27130493 | cg04843690 |
| 5360 | cg16463044 | cg27117439 | cg08033285 |
| 5361 | cg16465939 | cg26953293 | cg12948116 |
| 5362 | cg16474791 | cg26942121 | cg01204060 |
| 5363 | cg16475712 | cg26877336 | cg01414464 |
| 5364 | cg16476700 | cg26856771 | cg18247852 |
| 5365 | cg16479633 | cg26804423 | cg05561386 |
| 5366 | cg16488544 | cg26803670 | cg11994639 |
| 5367 | cg16489468 | cg26711406 | cg18692382 |
| 5368 | cg16496024 | cg26613811 | cg00043005 |
| 5369 | cg16496462 | cg26495716 | cg01214847 |
| 5370 | cg16499415 | cg26426564 | cg09372617 |
| 5371 | cg16499416 | cg26311262 | cg06167719 |
| 5372 | cg16499956 | cg26261270 | cg27287438 |
| 5373 | cg16502866 | cg26178184 | cg26448137 |
| 5374 | cg16509072 | cg26177754 | cg01559031 |
| 5375 | cg16509173 | cg26105658 | cg15933120 |
| 5376 | cg16510440 | cg26100137 | cg14264901 |
| 5377 | cg16511831 | cg26060535 | cg02907662 |
| 5378 | cg16514214 | cg26019124 | cg25668093 |
| 5379 | cg16517702 | cg25939647 | cg09216143 |
| 5380 | cg16521032 | cg25883020 | cg05767015 |
| 5381 | cg16521443 | cg25881985 | cg01914059 |
| 5382 | cg16522491 | cg25807487 | cg02102684 |
| 5383 | cg16523645 | cg25713411 | cg08864042 |
| 5384 | cg16525330 | cg25661792 | cg13672348 |
| 5385 | cg16526755 | cg25649889 | cg27400447 |
| 5386 | cg16529592 | cg25619703 | cg27278961 |
| 5387 | cg16530165 | cg25588387 | cg10168009 |
| 5388 | cg16532399 | cg25531618 | cg04129282 |
| 5389 | cg16533510 | cg25498969 | cg04465834 |
| 5390 | cg16537245 | cg25492112 | cg03125400 |
| 5391 | cg16550656 | cg25406657 | cg13521002 |
| 5392 | cg16563454 | cg25383568 | cg20156139 |
| 5393 | cg16564132 | cg25311162 | cg03526625 |
| 5394 | cg16564135 | cg25275372 | cg04386759 |
| 5395 | cg16565294 | cg25261191 | cg10115918 |
| 5396 | cg16566899 | cg25249728 | cg22379668 |
| 5397 | cg16570314 | cg25148456 | cg01558195 |
| 5398 | cg16572224 | cg25095994 | cg26120842 |
| 5399 | cg16572410 | cg25082361 | cg16741602 |
| 5400 | cg16572603 | cg25066224 | cg25270886 |
| 5401 | cg16580681 | cg25053164 | cg23750338 |
| 5402 | cg16582732 | cg24973993 | cg16217297 |
| 5403 | cg16584688 | cg24773493 | cg10370426 |

|      |            |            |            |
|------|------------|------------|------------|
| 5404 | cg16585619 | cg24748868 | cg04941831 |
| 5405 | cg16597437 | cg24723883 | cg21650861 |
| 5406 | cg16602460 | cg24674087 | cg23108126 |
| 5407 | cg16608596 | cg24469719 | cg06332666 |
| 5408 | cg16609966 | cg24463664 | cg01733438 |
| 5409 | cg16616370 | cg24462247 | cg14830485 |
| 5410 | cg16616765 | cg24425316 | cg06671298 |
| 5411 | cg16617141 | cg24372256 | cg26224791 |
| 5412 | cg16621790 | cg24365837 | cg13499923 |
| 5413 | cg16626731 | cg24299913 | cg21334198 |
| 5414 | cg16629076 | cg24294013 | cg11952839 |
| 5415 | cg16636756 | cg24194413 | cg05858079 |
| 5416 | cg16640008 | cg24163616 | cg06126019 |
| 5417 | cg16640450 | cg24093176 | cg26222498 |
| 5418 | cg16653700 | cg23976499 | cg15637254 |
| 5419 | cg16660312 | cg23951305 | cg27612166 |
| 5420 | cg16664095 | cg23895846 | cg06355908 |
| 5421 | cg16666964 | cg23887149 | cg04140297 |
| 5422 | cg16668534 | cg23876072 | cg13850871 |
| 5423 | cg16668903 | cg23834919 | cg12705212 |
| 5424 | cg16672557 | cg23707719 | cg00610205 |
| 5425 | cg16680624 | cg23614979 | cg01345395 |
| 5426 | cg16681083 | cg23539494 | cg24270629 |
| 5427 | cg16681436 | cg23529249 | cg21805118 |
| 5428 | cg16694664 | cg23509272 | cg01825806 |
| 5429 | cg16695570 | cg23476802 | cg18881978 |
| 5430 | cg16697024 | cg23339720 | cg27632471 |
| 5431 | cg16700163 | cg23301539 | cg09697259 |
| 5432 | cg16700555 | cg23261102 | cg19781117 |
| 5433 | cg16704889 | cg23212751 | cg04353997 |
| 5434 | cg16704938 | cg23019125 | cg04685302 |
| 5435 | cg16706038 | cg22979433 | cg21460686 |
| 5436 | cg16707423 | cg22908922 | cg13624631 |
| 5437 | cg16711011 | cg22854448 | cg00549798 |
| 5438 | cg16711084 | cg22846966 | cg13135376 |
| 5439 | cg16712866 | cg22838354 | cg26614264 |
| 5440 | cg16718902 | cg22831256 | cg27117439 |
| 5441 | cg16721977 | cg22762745 | cg14425914 |
| 5442 | cg16726039 | cg22761077 | cg13734106 |
| 5443 | cg16726374 | cg22731981 | cg24752354 |
| 5444 | cg16734433 | cg22731190 | cg21170978 |
| 5445 | cg16734451 | cg22706186 | cg22366375 |
| 5446 | cg16738646 | cg22655196 | cg18813518 |
| 5447 | cg16745596 | cg22555262 | cg10642094 |
| 5448 | cg16747567 | cg22463097 | cg06584329 |
| 5449 | cg16752592 | cg22380476 | cg27399753 |
| 5450 | cg16759204 | cg22171607 | cg19055828 |
| 5451 | cg16762085 | cg22047282 | cg27100471 |
| 5452 | cg16766036 | cg21998505 | cg22237707 |
| 5453 | cg16766325 | cg21879102 | cg09474229 |
| 5454 | cg16772023 | cg21735384 | cg22011888 |
| 5455 | cg16773043 | cg21725701 | cg18168520 |
| 5456 | cg16776981 | cg21620968 | cg24423806 |

|      |            |            |            |
|------|------------|------------|------------|
| 5457 | cg16778107 | cg21569714 | cg05040210 |
| 5458 | cg16786144 | cg21557473 | cg00028338 |
| 5459 | cg16794682 | cg21546950 | cg05770240 |
| 5460 | cg16796135 | cg21445553 | cg23935261 |
| 5461 | cg16797656 | cg21374048 | cg22679890 |
| 5462 | cg16803044 | cg21364077 | cg14569423 |
| 5463 | cg16812626 | cg21286967 | cg19044462 |
| 5464 | cg16819272 | cg21252105 | cg25856632 |
| 5465 | cg16820411 | cg21158528 | cg20512713 |
| 5466 | cg16823064 | cg21067905 | cg12371563 |
| 5467 | cg16824603 | cg21031345 | cg06406157 |
| 5468 | cg16828491 | cg20989443 | cg05062820 |
| 5469 | cg16829042 | cg20967819 | cg21497164 |
| 5470 | cg16846503 | cg20943461 | cg20412217 |
| 5471 | cg16861209 | cg20924972 | cg09956907 |
| 5472 | cg16863382 | cg20861822 | cg14952488 |
| 5473 | cg16867086 | cg20733739 | cg14328115 |
| 5474 | cg16874347 | cg20677267 | cg07990198 |
| 5475 | cg16876192 | cg20609679 | cg06673840 |
| 5476 | cg16880392 | cg20548182 | cg05076082 |
| 5477 | cg16883145 | cg20540306 | cg02304222 |
| 5478 | cg16885096 | cg20494661 | cg20571592 |
| 5479 | cg16885557 | cg20490386 | cg07071809 |
| 5480 | cg16890796 | cg20449048 | cg04248364 |
| 5481 | cg16892393 | cg20396385 | cg13096278 |
| 5482 | cg16897462 | cg20338075 | cg22811647 |
| 5483 | cg16897800 | cg20262021 | cg07867517 |
| 5484 | cg16902190 | cg20252837 | cg03538436 |
| 5485 | cg16908123 | cg20070852 | cg13514778 |
| 5486 | cg16908801 | cg20017253 | cg07706695 |
| 5487 | cg16910448 | cg19783160 | cg17849972 |
| 5488 | cg16919420 | cg19725377 | cg03333776 |
| 5489 | cg16920538 | cg19713196 | cg03884082 |
| 5490 | cg16927379 | cg19658812 | cg05615477 |
| 5491 | cg16929793 | cg19629843 | cg22963109 |
| 5492 | cg16949378 | cg19539481 | cg21276022 |
| 5493 | cg16953473 | cg19536407 | cg09935792 |
| 5494 | cg16962557 | cg19480117 | cg06532257 |
| 5495 | cg16975812 | cg19478410 | cg14723032 |
| 5496 | cg16989380 | cg19455322 | cg23635789 |
| 5497 | cg16995299 | cg19382919 | cg10512408 |
| 5498 | cg16996242 | cg19308185 | cg07691004 |
| 5499 | cg16996266 | cg19287817 | cg07206497 |
| 5500 | cg16996571 | cg19270505 | cg18817654 |
| 5501 | cg16998564 | cg19257111 | cg23413464 |
| 5502 | cg17009731 | cg19125081 | cg13947999 |
| 5503 | cg17010895 | cg19107511 | cg26745294 |
| 5504 | cg17013513 | cg19011826 | cg00789416 |
| 5505 | cg17017404 | cg18918538 | cg12700788 |
| 5506 | cg17018661 | cg18862502 | cg05986052 |
| 5507 | cg17021949 | cg18760055 | cg11940726 |
| 5508 | cg17024719 | cg18751203 | cg16387532 |
| 5509 | cg17027476 | cg18716503 | cg16629076 |



|      |            |            |            |
|------|------------|------------|------------|
| 5510 | cg17030415 | cg18475969 | cg07379550 |
| 5511 | cg17032372 | cg18371976 | cg16511831 |
| 5512 | cg17034088 | cg18327695 | cg23157618 |
| 5513 | cg17036007 | cg18243853 | cg22521416 |
| 5514 | cg17036641 | cg18228456 | cg24562682 |
| 5515 | cg17049328 | cg18191688 | cg09900084 |
| 5516 | cg17054783 | cg18019825 | cg25409944 |
| 5517 | cg17067528 | cg17961835 | cg10552275 |
| 5518 | cg17074958 | cg17956079 | cg06193668 |
| 5519 | cg17094249 | cg17844448 | cg27506609 |
| 5520 | cg17095737 | cg17792616 | cg06241044 |
| 5521 | cg17095936 | cg17749384 | cg13860981 |
| 5522 | cg17099569 | cg17722435 | cg11698119 |
| 5523 | cg17101681 | cg17696194 | cg22367886 |
| 5524 | cg17103856 | cg17673769 | cg16329509 |
| 5525 | cg17107017 | cg17645528 | cg11450827 |
| 5526 | cg17112404 | cg17563229 | cg21385606 |
| 5527 | cg17112695 | cg17524821 | cg08259083 |
| 5528 | cg17112949 | cg17429870 | cg03659476 |
| 5529 | cg17113147 | cg17348667 | cg02999082 |
| 5530 | cg17115147 | cg17322118 | cg19182279 |
| 5531 | cg17130544 | cg17221945 | cg08836353 |
| 5532 | cg17152266 | cg17206596 | cg26379230 |
| 5533 | cg17153432 | cg17112949 | cg00978248 |
| 5534 | cg17156862 | cg17034088 | cg02818775 |
| 5535 | cg17169982 | cg17030415 | cg24881558 |
| 5536 | cg17171539 | cg17010895 | cg21438602 |
| 5537 | cg17172949 | cg16920538 | cg23087358 |
| 5538 | cg17173086 | cg16766325 | cg07095945 |
| 5539 | cg17174566 | cg16726374 | cg13367537 |
| 5540 | cg17176209 | cg16684117 | cg02107173 |
| 5541 | cg17179557 | cg16560256 | cg06925389 |
| 5542 | cg17181336 | cg16526755 | cg25355635 |
| 5543 | cg17185710 | cg16519668 | cg25515317 |
| 5544 | cg17196448 | cg16498681 | cg02358804 |
| 5545 | cg17199010 | cg16475712 | cg24462247 |
| 5546 | cg17201542 | cg16397629 | cg24009250 |
| 5547 | cg17202331 | cg16392729 | cg18517266 |
| 5548 | cg17202706 | cg16344173 | cg18051353 |
| 5549 | cg17203290 | cg16306870 | cg18917736 |
| 5550 | cg17206596 | cg16175077 | cg21177940 |
| 5551 | cg17208278 | cg16009311 | cg15737302 |
| 5552 | cg17211223 | cg15891850 | cg13003178 |
| 5553 | cg17213154 | cg15816464 | cg18704218 |
| 5554 | cg17214107 | cg15636859 | cg01077713 |
| 5555 | cg17216243 | cg15541630 | cg12163781 |
| 5556 | cg17221941 | cg15516314 | cg23372092 |
| 5557 | cg17226348 | cg15444149 | cg11151524 |
| 5558 | cg17234201 | cg15355859 | cg06219670 |
| 5559 | cg17241937 | cg15346619 | cg23261343 |
| 5560 | cg17243540 | cg15318570 | cg24362347 |
| 5561 | cg17250537 | cg15267890 | cg01139503 |
| 5562 | cg17254904 | cg15259233 | cg09004351 |

|      |            |            |            |
|------|------------|------------|------------|
| 5563 | cg17256760 | cg15230743 | cg18933685 |
| 5564 | cg17264541 | cg15034300 | cg26268565 |
| 5565 | cg17266282 | cg14875081 | cg18751958 |
| 5566 | cg17276624 | cg14833024 | cg03511735 |
| 5567 | cg17278466 | cg14829271 | cg12081291 |
| 5568 | cg17284725 | cg14747072 | cg02153855 |
| 5569 | cg17285177 | cg14650228 | cg23714019 |
| 5570 | cg17285883 | cg14642045 | cg09975561 |
| 5571 | cg17289222 | cg14630692 | cg14443041 |
| 5572 | cg17291826 | cg14596589 | cg17054783 |
| 5573 | cg17297354 | cg14583686 | cg02486181 |
| 5574 | cg17304712 | cg14444376 | cg15853299 |
| 5575 | cg17315679 | cg14377596 | cg05595142 |
| 5576 | cg17319576 | cg14331609 | cg13093023 |
| 5577 | cg17319795 | cg14329833 | cg19750606 |
| 5578 | cg17321561 | cg14321412 | cg15353597 |
| 5579 | cg17322118 | cg14113353 | cg12061219 |
| 5580 | cg17322655 | cg14074351 | cg25567674 |
| 5581 | cg17327331 | cg14016879 | cg09370702 |
| 5582 | cg17332023 | cg13981325 | cg08973281 |
| 5583 | cg17333042 | cg13930682 | cg22288012 |
| 5584 | cg17334762 | cg13598881 | cg16706038 |
| 5585 | cg17340779 | cg13586038 | cg10107322 |
| 5586 | cg17341136 | cg13584383 | cg13115424 |
| 5587 | cg17343483 | cg13583088 | cg24594604 |
| 5588 | cg17344813 | cg13567403 | cg16183741 |
| 5589 | cg17361593 | cg13558912 | cg16812626 |
| 5590 | cg17364872 | cg13545717 | cg19912309 |
| 5591 | cg17367836 | cg13475822 | cg16616370 |
| 5592 | cg17367884 | cg13400018 | cg08264519 |
| 5593 | cg17367901 | cg13378789 | cg14190128 |
| 5594 | cg17378535 | cg13278105 | cg00669856 |
| 5595 | cg17384769 | cg13210470 | cg00547727 |
| 5596 | cg17385318 | cg13189671 | cg23397909 |
| 5597 | cg17394978 | cg13162609 | cg00742738 |
| 5598 | cg17400113 | cg13029400 | cg03216506 |
| 5599 | cg17400235 | cg12905673 | cg22459081 |
| 5600 | cg17415355 | cg12819011 | cg26234644 |
| 5601 | cg17418956 | cg12797609 | cg02566359 |
| 5602 | cg17426166 | cg12737285 | cg07241090 |
| 5603 | cg17428748 | cg12736760 | cg05559648 |
| 5604 | cg17431079 | cg12727138 | cg09249800 |
| 5605 | cg17434577 | cg12686055 | cg07447742 |
| 5606 | cg17439009 | cg12657361 | cg20300794 |
| 5607 | cg17442683 | cg12583325 | cg24619276 |
| 5608 | cg17442932 | cg12550496 | cg21806238 |
| 5609 | cg17444479 | cg12526923 | cg14516350 |
| 5610 | cg17444642 | cg12450391 | cg13798270 |
| 5611 | cg17450505 | cg12433926 | cg01000937 |
| 5612 | cg17454920 | cg12419932 | cg13655570 |
| 5613 | cg17459290 | cg12392429 | cg02486904 |
| 5614 | cg17467243 | cg12233100 | cg04668631 |
| 5615 | cg17468543 | cg12077685 | cg03426615 |

|      |            |            |            |
|------|------------|------------|------------|
| 5616 | cg17469039 | cg12011299 | cg19081470 |
| 5617 | cg17470198 | cg11902934 | cg05504354 |
| 5618 | cg17470627 | cg11828820 | cg07743919 |
| 5619 | cg17475200 | cg11758841 | cg19422138 |
| 5620 | cg17475304 | cg11575912 | cg14218838 |
| 5621 | cg17482237 | cg11567885 | cg01339351 |
| 5622 | cg17505642 | cg11526020 | cg17522727 |
| 5623 | cg17508905 | cg11512026 | cg11068930 |
| 5624 | cg17511604 | cg11476985 | cg18931850 |
| 5625 | cg17517442 | cg11367404 | cg03333149 |
| 5626 | cg17522727 | cg11346522 | cg04929165 |
| 5627 | cg17524821 | cg11150559 | cg11828820 |
| 5628 | cg17525357 | cg11139446 | cg19478343 |
| 5629 | cg17528003 | cg11092157 | cg15712057 |
| 5630 | cg17537252 | cg11081826 | cg08863422 |
| 5631 | cg17537493 | cg11079426 | cg16089233 |
| 5632 | cg17548735 | cg10965996 | cg18543610 |
| 5633 | cg17550566 | cg10950593 | cg26325286 |
| 5634 | cg17560283 | cg10809958 | cg22764700 |
| 5635 | cg17563229 | cg10639411 | cg26070874 |
| 5636 | cg17569754 | cg10545738 | cg02274236 |
| 5637 | cg17574471 | cg10532807 | cg06269419 |
| 5638 | cg17578309 | cg10493436 | cg04183638 |
| 5639 | cg17586345 | cg10296062 | cg18302629 |
| 5640 | cg17587997 | cg10257671 | cg10601476 |
| 5641 | cg17589079 | cg10235845 | cg06549824 |
| 5642 | cg17589890 | cg10142436 | cg03630710 |
| 5643 | cg17599809 | cg10060631 | cg27317493 |
| 5644 | cg17601658 | cg10006956 | cg11517528 |
| 5645 | cg17610889 | cg09996971 | cg16784943 |
| 5646 | cg17611093 | cg09961689 | cg26398024 |
| 5647 | cg17634490 | cg09897002 | cg05976516 |
| 5648 | cg17638841 | cg09848749 | cg06477663 |
| 5649 | cg17645528 | cg09811393 | cg21163717 |
| 5650 | cg17649815 | cg09795809 | cg12156167 |
| 5651 | cg17650713 | cg09534489 | cg11367404 |
| 5652 | cg17667773 | cg09483967 | cg03017264 |
| 5653 | cg17670999 | cg09389557 | cg18435870 |
| 5654 | cg17671199 | cg09370299 | cg19618438 |
| 5655 | cg17672035 | cg09309208 | cg24437408 |
| 5656 | cg17673769 | cg09233395 | cg01194444 |
| 5657 | cg17678224 | cg09228051 | cg07352757 |
| 5658 | cg17680611 | cg09213124 | cg11671925 |
| 5659 | cg17683336 | cg09119967 | cg15744108 |
| 5660 | cg17685579 | cg09109383 | cg13908988 |
| 5661 | cg17692230 | cg09015905 | cg02785870 |
| 5662 | cg17695841 | cg08983215 | cg14937059 |
| 5663 | cg17700633 | cg08943374 | cg07607355 |
| 5664 | cg17702736 | cg08899531 | cg23690444 |
| 5665 | cg17703629 | cg08886695 | cg14584535 |
| 5666 | cg17720554 | cg08732879 | cg17032372 |
| 5667 | cg17721879 | cg08726900 | cg07008193 |
| 5668 | cg17722435 | cg08552167 | cg19632842 |

|      |            |            |            |
|------|------------|------------|------------|
| 5669 | cg17724175 | cg08411881 | cg15142430 |
| 5670 | cg17724627 | cg08293075 | cg06017355 |
| 5671 | cg17732044 | cg08176056 | cg18639238 |
| 5672 | cg17732877 | cg08132573 | cg05517824 |
| 5673 | cg17736336 | cg08101977 | cg08101977 |
| 5674 | cg17740401 | cg08003887 | cg02025435 |
| 5675 | cg17742459 | cg07990198 | cg22999502 |
| 5676 | cg17743939 | cg07938459 | cg13747876 |
| 5677 | cg17747635 | cg07929112 | cg18751203 |
| 5678 | cg17749384 | cg07907315 | cg06851844 |
| 5679 | cg17755483 | cg07888884 | cg24885442 |
| 5680 | cg17758899 | cg07849237 | cg25915512 |
| 5681 | cg17775332 | cg07836226 | cg05800368 |
| 5682 | cg17780565 | cg07835443 | cg15506281 |
| 5683 | cg17781958 | cg07810967 | cg06861572 |
| 5684 | cg17783359 | cg07713495 | cg02346135 |
| 5685 | cg17787876 | cg07642499 | cg21165519 |
| 5686 | cg17789138 | cg07638689 | cg03841376 |
| 5687 | cg17791936 | cg07607355 | cg10533694 |
| 5688 | cg17792616 | cg07574854 | cg00938266 |
| 5689 | cg17793608 | cg07521789 | cg01023808 |
| 5690 | cg17796043 | cg07464578 | cg05279172 |
| 5691 | cg17796593 | cg07412315 | cg04986373 |
| 5692 | cg17797898 | cg07336123 | cg07192772 |
| 5693 | cg17798749 | cg07260789 | cg04187433 |
| 5694 | cg17799760 | cg07221518 | cg26714514 |
| 5695 | cg17803589 | cg07205670 | cg26104640 |
| 5696 | cg17817350 | cg07178379 | cg00473257 |
| 5697 | cg17818471 | cg07064592 | cg08386696 |
| 5698 | cg17819085 | cg07057687 | cg05258102 |
| 5699 | cg17820025 | cg07025242 | cg03835755 |
| 5700 | cg17825194 | cg07022478 | cg26187123 |
| 5701 | cg17827670 | cg06995299 | cg10796022 |
| 5702 | cg17830810 | cg06969777 | cg02144518 |
| 5703 | cg17830812 | cg06937201 | cg06008803 |
| 5704 | cg17836842 | cg06926306 | cg00680875 |
| 5705 | cg17838182 | cg06916574 | cg24502047 |
| 5706 | cg17842918 | cg06862949 | cg23399577 |
| 5707 | cg17843418 | cg06833798 | cg25554340 |
| 5708 | cg17844448 | cg06815308 | cg16419526 |
| 5709 | cg17846497 | cg06787104 | cg04997235 |
| 5710 | cg17849972 | cg06783380 | cg09511351 |
| 5711 | cg17850498 | cg06741399 | cg16717225 |
| 5712 | cg17851345 | cg06696911 | cg05977276 |
| 5713 | cg17853850 | cg06650364 | cg03657791 |
| 5714 | cg17854297 | cg06633739 | cg00943124 |
| 5715 | cg17857870 | cg06614534 | cg01309081 |
| 5716 | cg17865371 | cg06572904 | cg25594106 |
| 5717 | cg17868840 | cg06568783 | cg10299941 |
| 5718 | cg17876645 | cg06528340 | cg13222945 |
| 5719 | cg17877600 | cg06509598 | cg05041871 |
| 5720 | cg17884766 | cg06456125 | cg01437411 |
| 5721 | cg17886413 | cg06432200 | cg10754670 |

|      |            |            |            |
|------|------------|------------|------------|
| 5722 | cg17893426 | cg06386880 | cg14583686 |
| 5723 | cg17901582 | cg06371044 | cg16306083 |
| 5724 | cg17903316 | cg06363129 | cg06018095 |
| 5725 | cg17920820 | cg06332339 | cg27053299 |
| 5726 | cg17929859 | cg06233301 | cg02596645 |
| 5727 | cg17931529 | cg06213876 | cg10856972 |
| 5728 | cg17938607 | cg06174078 | cg26484017 |
| 5729 | cg17939585 | cg06109284 | cg16694397 |
| 5730 | cg17943672 | cg06012483 | cg06628679 |
| 5731 | cg17945541 | cg05949181 | cg17400235 |
| 5732 | cg17947599 | cg05909702 | cg15959893 |
| 5733 | cg17956079 | cg05776138 | cg15498306 |
| 5734 | cg17958516 | cg05767299 | cg18592315 |
| 5735 | cg17966344 | cg05715422 | cg01693662 |
| 5736 | cg17971649 | cg05703996 | cg22472360 |
| 5737 | cg17972213 | cg05682319 | cg21043481 |
| 5738 | cg17976731 | cg05631399 | cg03817675 |
| 5739 | cg17977133 | cg05418508 | cg02983650 |
| 5740 | cg17977723 | cg05409945 | cg10642330 |
| 5741 | cg17980999 | cg05404117 | cg05404117 |
| 5742 | cg17985555 | cg05368595 | cg06846976 |
| 5743 | cg17993073 | cg05361262 | cg16158296 |
| 5744 | cg18000764 | cg05291588 | cg13035910 |
| 5745 | cg18011099 | cg05267269 | cg22905571 |
| 5746 | cg18013789 | cg05226061 | cg14118424 |
| 5747 | cg18018990 | cg05224498 | cg12467090 |
| 5748 | cg18019825 | cg05201312 | cg27144884 |
| 5749 | cg18027683 | cg05190559 | cg13971603 |
| 5750 | cg18030799 | cg05185038 | cg09123625 |
| 5751 | cg18032164 | cg05185019 | cg10884953 |
| 5752 | cg18034859 | cg05161923 | cg03971344 |
| 5753 | cg18035571 | cg05112986 | cg13200640 |
| 5754 | cg18036710 | cg05099063 | cg16366809 |
| 5755 | cg18045658 | cg04983933 | cg19101998 |
| 5756 | cg18047920 | cg04956511 | cg09174690 |
| 5757 | cg18048309 | cg04920385 | cg06090895 |
| 5758 | cg18050634 | cg04846781 | cg20600205 |
| 5759 | cg18051353 | cg04843690 | cg01283300 |
| 5760 | cg18051825 | cg04797170 | cg26185621 |
| 5761 | cg18055067 | cg04751761 | cg10053473 |
| 5762 | cg18058895 | cg04674497 | cg03728898 |
| 5763 | cg18061711 | cg04545872 | cg06012483 |
| 5764 | cg18067847 | cg04541146 | cg22622667 |
| 5765 | cg18069174 | cg04517274 | cg23350558 |
| 5766 | cg18083415 | cg04508114 | cg06862949 |
| 5767 | cg18090631 | cg04290396 | cg26579379 |
| 5768 | cg18091245 | cg04282530 | cg03482221 |
| 5769 | cg18095041 | cg04260676 | cg19241089 |
| 5770 | cg18098187 | cg04251828 | cg14870461 |
| 5771 | cg18108009 | cg04232282 | cg22213752 |
| 5772 | cg18108716 | cg04187433 | cg00271177 |
| 5773 | cg18109289 | cg04147875 | cg27403628 |
| 5774 | cg18116267 | cg04107939 | cg14297023 |

|      |            |            |            |
|------|------------|------------|------------|
| 5775 | cg18118490 | cg04095069 | cg05712931 |
| 5776 | cg18120975 | cg04055053 | cg20185083 |
| 5777 | cg18132690 | cg03980715 | cg14923398 |
| 5778 | cg18142262 | cg03975834 | cg16075266 |
| 5779 | cg18148375 | cg03841376 | cg23028631 |
| 5780 | cg18148488 | cg03796321 | cg14206983 |
| 5781 | cg18153137 | cg03736774 | cg10257671 |
| 5782 | cg18158033 | cg03728898 | cg24336730 |
| 5783 | cg18163092 | cg03615933 | cg25535708 |
| 5784 | cg18168520 | cg03437713 | cg09556902 |
| 5785 | cg18172013 | cg03333116 | cg27096981 |
| 5786 | cg18174089 | cg03137908 | cg15929241 |
| 5787 | cg18177819 | cg03095814 | cg14475381 |
| 5788 | cg18181891 | cg03030665 | cg04240456 |
| 5789 | cg18191688 | cg02972475 | cg18465945 |
| 5790 | cg18193482 | cg02886591 | cg26868306 |
| 5791 | cg18201671 | cg02883198 | cg26618058 |
| 5792 | cg18207099 | cg02753990 | cg14094409 |
| 5793 | cg18222083 | cg02658272 | cg10225755 |
| 5794 | cg18225577 | cg02598618 | cg08733553 |
| 5795 | cg18226382 | cg02524863 | cg20122645 |
| 5796 | cg18228456 | cg02492708 | cg06892815 |
| 5797 | cg18231184 | cg02389084 | cg06665485 |
| 5798 | cg18233538 | cg02323633 | cg25162533 |
| 5799 | cg18237191 | cg02297063 | cg03498175 |
| 5800 | cg18238763 | cg02110527 | cg17297354 |
| 5801 | cg18241094 | cg02062816 | cg13525067 |
| 5802 | cg18243853 | cg02061820 | cg24595704 |
| 5803 | cg18244708 | cg02010047 | cg07050626 |
| 5804 | cg18247852 | cg01959262 | cg13533142 |
| 5805 | cg18248273 | cg01943414 | cg20329153 |
| 5806 | cg18249380 | cg01922697 | cg10193870 |
| 5807 | cg18250135 | cg01887374 | cg15367698 |
| 5808 | cg18252102 | cg01866959 | cg06208270 |
| 5809 | cg18253787 | cg01783960 | cg00670539 |
| 5810 | cg18253910 | cg01641136 | cg17018661 |
| 5811 | cg18259003 | cg01602730 | cg00523012 |
| 5812 | cg18259342 | cg01599714 | cg21143086 |
| 5813 | cg18259487 | cg01436550 | cg26661623 |
| 5814 | cg18264298 | cg01422009 | cg00352031 |
| 5815 | cg18266458 | cg01404873 | cg08148618 |
| 5816 | cg18272538 | cg01390647 | cg26526953 |
| 5817 | cg18279126 | cg01375259 | cg13189671 |
| 5818 | cg18280717 | cg01362762 | cg09100695 |
| 5819 | cg18285813 | cg01356872 | cg13495850 |
| 5820 | cg18294610 | cg01356198 | cg04341806 |
| 5821 | cg18302629 | cg01306747 | cg26502610 |
| 5822 | cg18304186 | cg01283300 | cg25178749 |
| 5823 | cg18311516 | cg01207974 | cg10585257 |
| 5824 | cg18313342 | cg01201519 | cg18384190 |
| 5825 | cg18317492 | cg01176823 | cg05668807 |
| 5826 | cg18323018 | cg01060040 | cg13881619 |
| 5827 | cg18325866 | cg01052428 | cg03881382 |

|      |            |            |            |
|------|------------|------------|------------|
| 5828 | cg18327695 | cg00950412 | cg26118698 |
| 5829 | cg18327762 | cg00918130 | cg08985282 |
| 5830 | cg18330203 | cg00881300 | cg19755886 |
| 5831 | cg18338925 | cg00877758 | cg27401116 |
| 5832 | cg18340416 | cg00864551 | cg03278299 |
| 5833 | cg18348566 | cg00841141 | cg04774496 |
| 5834 | cg18348731 | cg00713972 | cg18965684 |
| 5835 | cg18352616 | cg00667680 | cg25783610 |
| 5836 | cg18369325 | cg00651488 | cg17792616 |
| 5837 | cg18369990 | cg00620733 | cg12068791 |
| 5838 | cg18371976 | cg00556407 | cg15548656 |
| 5839 | cg18375421 | cg00464814 | cg01483824 |
| 5840 | cg18378662 | cg00446536 | cg19529732 |
| 5841 | cg18386876 | cg00442802 | cg10802680 |
| 5842 | cg18397308 | cg00392155 | cg06310294 |
| 5843 | cg18397743 | cg00347938 | cg03648611 |
| 5844 | cg18400889 | cg00296038 | cg03737788 |
| 5845 | cg18406924 | cg00206063 | cg27177415 |
| 5846 | cg18428888 | cg00175487 | cg25059445 |
| 5847 | cg18435870 | cg00166343 | cg07927540 |
| 5848 | cg18436810 | cg00145911 | cg14426682 |
| 5849 | cg18440069 | cg00127198 | cg03286742 |
| 5850 | cg18442286 | cg00091004 | cg06068392 |
| 5851 | cg18444673 | cg00070460 | cg03661299 |
| 5852 | cg18459869 | cg27634115 | cg06561892 |
| 5853 | cg18465945 | cg27599376 | cg06741399 |
| 5854 | cg18467406 | cg27521744 | cg20594316 |
| 5855 | cg18474180 | cg27440150 | cg13194638 |
| 5856 | cg18475969 | cg27336068 | cg14321412 |
| 5857 | cg18482303 | cg27263448 | cg09397692 |
| 5858 | cg18484068 | cg27178714 | cg24295561 |
| 5859 | cg18485872 | cg27177779 | cg26152188 |
| 5860 | cg18485877 | cg27143695 | cg23536830 |
| 5861 | cg18487916 | cg27101023 | cg16071082 |
| 5862 | cg18493371 | cg27026202 | cg02563156 |
| 5863 | cg18503234 | cg27000120 | cg05002642 |
| 5864 | cg18505837 | cg26987720 | cg00431813 |
| 5865 | cg18514164 | cg26819427 | cg20265951 |
| 5866 | cg18519450 | cg26787096 | cg21513803 |
| 5867 | cg18526008 | cg26739233 | cg25825970 |
| 5868 | cg18527971 | cg26579379 | cg23954066 |
| 5869 | cg18533833 | cg26524387 | cg05274056 |
| 5870 | cg18537410 | cg26504421 | cg03289072 |
| 5871 | cg18539461 | cg26428962 | cg26354947 |
| 5872 | cg18543610 | cg26342552 | cg21574855 |
| 5873 | cg18544888 | cg26323752 | cg08205361 |
| 5874 | cg18549386 | cg26224791 | cg20396385 |
| 5875 | cg18553570 | cg25954194 | cg11210357 |
| 5876 | cg18556792 | cg25934198 | cg07328519 |
| 5877 | cg18560638 | cg25890936 | cg27231912 |
| 5878 | cg18565130 | cg25782041 | cg11046578 |
| 5879 | cg18566883 | cg25736617 | cg13190879 |
| 5880 | cg18568570 | cg25552768 | cg07661965 |

|      |            |            |            |
|------|------------|------------|------------|
| 5881 | cg18581669 | cg25487008 | cg26323752 |
| 5882 | cg18583329 | cg25433222 | cg15326069 |
| 5883 | cg18595065 | cg25431366 | cg02102456 |
| 5884 | cg18601229 | cg25386426 | cg14051367 |
| 5885 | cg18604419 | cg25316172 | cg09213124 |
| 5886 | cg18610958 | cg25306579 | cg01398428 |
| 5887 | cg18624777 | cg25285041 | cg22734014 |
| 5888 | cg18628371 | cg25246084 | cg17747635 |
| 5889 | cg18634690 | cg25202370 | cg00595472 |
| 5890 | cg18636829 | cg25142010 | cg09544892 |
| 5891 | cg18637761 | cg25104512 | cg15228983 |
| 5892 | cg18645910 | cg25097308 | cg21388753 |
| 5893 | cg18649632 | cg25059445 | cg04165857 |
| 5894 | cg18652285 | cg24997330 | cg21408581 |
| 5895 | cg18653451 | cg24957532 | cg25433222 |
| 5896 | cg18657988 | cg24915915 | cg05966641 |
| 5897 | cg18659450 | cg24903767 | cg22911054 |
| 5898 | cg18668813 | cg24847636 | cg14843670 |
| 5899 | cg18673163 | cg24709718 | cg25831522 |
| 5900 | cg18677278 | cg24701232 | cg02650728 |
| 5901 | cg18677603 | cg24625084 | cg24709718 |
| 5902 | cg18689614 | cg24450180 | cg08173709 |
| 5903 | cg18690282 | cg24321688 | cg21549497 |
| 5904 | cg18692382 | cg24301288 | cg07505901 |
| 5905 | cg18693479 | cg24295561 | cg01589629 |
| 5906 | cg18697143 | cg24209874 | cg22289815 |
| 5907 | cg18698681 | cg24123198 | cg18177819 |
| 5908 | cg18700940 | cg24097814 | cg01060040 |
| 5909 | cg18703227 | cg24090911 | cg25978487 |
| 5910 | cg18703721 | cg24047905 | cg12741436 |
| 5911 | cg18704218 | cg23986590 | cg15459715 |
| 5912 | cg18704595 | cg23954066 | cg26377276 |
| 5913 | cg18708810 | cg23953820 | cg21606405 |
| 5914 | cg18710162 | cg23939642 | cg11439877 |
| 5915 | cg18716503 | cg23910341 | cg07025242 |
| 5916 | cg18720622 | cg23894219 | cg18338925 |
| 5917 | cg18729086 | cg23854567 | cg26499286 |
| 5918 | cg18729681 | cg23820770 | cg24118850 |
| 5919 | cg18732855 | cg23738548 | cg00268330 |
| 5920 | cg18738548 | cg23547892 | cg03052760 |
| 5921 | cg18741439 | cg23546343 | cg20798249 |
| 5922 | cg18749563 | cg23514135 | cg20390500 |
| 5923 | cg18751203 | cg23455778 | cg20756600 |
| 5924 | cg18751958 | cg23350812 | cg11095122 |
| 5925 | cg18752987 | cg23348723 | cg08132525 |
| 5926 | cg18758281 | cg23339482 | cg18406924 |
| 5927 | cg18758976 | cg23259001 | cg21650193 |
| 5928 | cg18760055 | cg23233631 | cg17634490 |
| 5929 | cg18761894 | cg23125506 | cg02753990 |
| 5930 | cg18763720 | cg22982093 | cg26860182 |
| 5931 | cg18765405 | cg22906113 | cg00470817 |
| 5932 | cg18771839 | cg22905571 | cg14228788 |
| 5933 | cg18772205 | cg22731637 | cg16537245 |



|      |            |            |            |
|------|------------|------------|------------|
| 5934 | cg18793661 | cg22660619 | cg16707423 |
| 5935 | cg18794809 | cg22591040 | cg12982283 |
| 5936 | cg18795383 | cg22576033 | cg20586971 |
| 5937 | cg18798744 | cg22515589 | cg27478020 |
| 5938 | cg18801945 | cg22433862 | cg06497934 |
| 5939 | cg18804667 | cg22413209 | cg08661751 |
| 5940 | cg18809729 | cg22330533 | cg02110527 |
| 5941 | cg18811860 | cg22304169 | cg15269148 |
| 5942 | cg18813518 | cg22288012 | cg08418375 |
| 5943 | cg18815879 | cg22247495 | cg24903767 |
| 5944 | cg18817444 | cg22215392 | cg00680277 |
| 5945 | cg18817654 | cg22189544 | cg06568783 |
| 5946 | cg18817831 | cg22151881 | cg08537794 |
| 5947 | cg18818075 | cg22060153 | cg16071782 |
| 5948 | cg18820914 | cg22048683 | cg05364570 |
| 5949 | cg18829162 | cg22019569 | cg12456379 |
| 5950 | cg18833140 | cg21987921 | cg02262037 |
| 5951 | cg18834729 | cg21751147 | cg25350827 |
| 5952 | cg18842598 | cg21647035 | cg07549715 |
| 5953 | cg18851831 | cg21643731 | cg14410516 |
| 5954 | cg18852515 | cg21591452 | cg21069814 |
| 5955 | cg18854004 | cg21562750 | cg03163819 |
| 5956 | cg18854872 | cg21492137 | cg06792186 |
| 5957 | cg18855096 | cg21409449 | cg21309147 |
| 5958 | cg18856214 | cg21370924 | cg23455778 |
| 5959 | cg18857588 | cg21311736 | cg15363996 |
| 5960 | cg18857655 | cg21307043 | cg00144414 |
| 5961 | cg18860847 | cg21177165 | cg09777637 |
| 5962 | cg18862502 | cg21105175 | cg21331845 |
| 5963 | cg18863119 | cg21080655 | cg09869286 |
| 5964 | cg18869485 | cg21015266 | cg25559625 |
| 5965 | cg18870258 | cg20794957 | cg14655044 |
| 5966 | cg18881778 | cg20778199 | cg27458631 |
| 5967 | cg18881978 | cg20738406 | cg02148034 |
| 5968 | cg18885289 | cg20733077 | cg23666829 |
| 5969 | cg18907942 | cg20732160 | cg09906780 |
| 5970 | cg18912160 | cg20685600 | cg02069095 |
| 5971 | cg18918538 | cg20608966 | cg23092218 |
| 5972 | cg18925548 | cg20591120 | cg12680106 |
| 5973 | cg18930928 | cg20588285 | cg06610254 |
| 5974 | cg18931850 | cg20586971 | cg12550496 |
| 5975 | cg18933685 | cg20579480 | cg22515589 |
| 5976 | cg18935449 | cg20342460 | cg13920768 |
| 5977 | cg18939081 | cg20329153 | cg19995595 |
| 5978 | cg18940830 | cg20320158 | cg24730224 |
| 5979 | cg18941831 | cg20118577 | cg01306662 |
| 5980 | cg18957751 | cg20090162 | cg04535391 |
| 5981 | cg18960324 | cg20067272 | cg01628053 |
| 5982 | cg18965684 | cg19931596 | cg22558061 |
| 5983 | cg18968623 | cg19878200 | cg20738406 |
| 5984 | cg18977727 | cg19842026 | cg16349616 |
| 5985 | cg18978531 | cg19776793 | cg17332023 |
| 5986 | cg18994446 | cg19605931 | cg10059410 |

|      |            |            |            |
|------|------------|------------|------------|
| 5987 | cg18998365 | cg19410796 | cg15574810 |
| 5988 | cg18998442 | cg19293468 | cg13175060 |
| 5989 | cg19005763 | cg19240021 | cg15613048 |
| 5990 | cg19006220 | cg19235974 | cg25048985 |
| 5991 | cg19007948 | cg19216851 | cg07102406 |
| 5992 | cg19011826 | cg19133023 | cg14373988 |
| 5993 | cg19018155 | cg19090861 | cg24625084 |
| 5994 | cg19020855 | cg19049734 | cg08818094 |
| 5995 | cg19032492 | cg19044462 | cg03640215 |
| 5996 | cg19040077 | cg19034028 | cg17211223 |
| 5997 | cg19047283 | cg19005763 | cg16718902 |
| 5998 | cg19047670 | cg18989491 | cg24544986 |
| 5999 | cg19049734 | cg18881978 | cg00412775 |
| 6000 | cg19051802 | cg18881778 | cg05418719 |
| 6001 | cg19055390 | cg18842598 | cg07731639 |
| 6002 | cg19055828 | cg18834729 | cg17798749 |
| 6003 | cg19057779 | cg18833140 | cg13409409 |
| 6004 | cg19057916 | cg18817831 | cg26013235 |
| 6005 | cg19058262 | cg18720622 | cg26105658 |
| 6006 | cg19062489 | cg18708810 | cg25013910 |
| 6007 | cg19063061 | cg18700940 | cg26540925 |
| 6008 | cg19063768 | cg18692382 | cg10931901 |
| 6009 | cg19078037 | cg18592315 | cg09500421 |
| 6010 | cg19078853 | cg18532070 | cg09603024 |
| 6011 | cg19083914 | cg18493371 | cg11400143 |
| 6012 | cg19084508 | cg18492803 | cg23906872 |
| 6013 | cg19089328 | cg18465945 | cg23490822 |
| 6014 | cg19090861 | cg18340416 | cg05400252 |
| 6015 | cg19100996 | cg18313342 | cg04251828 |
| 6016 | cg19107511 | cg18294610 | cg16392860 |
| 6017 | cg19113668 | cg18249380 | cg11253592 |
| 6018 | cg19116924 | cg18237191 | cg25323005 |
| 6019 | cg19123356 | cg18168520 | cg19779886 |
| 6020 | cg19125081 | cg17853089 | cg09486967 |
| 6021 | cg19130973 | cg17803589 | cg16570314 |
| 6022 | cg19130981 | cg17743939 | cg00607989 |
| 6023 | cg19133023 | cg17740401 | cg16929793 |
| 6024 | cg19138499 | cg17732877 | cg03696370 |
| 6025 | cg19144954 | cg17724627 | cg03330678 |
| 6026 | cg19161559 | cg17720554 | cg18793661 |
| 6027 | cg19162768 | cg17667773 | cg17517442 |
| 6028 | cg19170881 | cg17611093 | cg03501128 |
| 6029 | cg19178876 | cg17610889 | cg27505472 |
| 6030 | cg19181160 | cg17560283 | cg24976262 |
| 6031 | cg19182279 | cg17539235 | cg04512603 |
| 6032 | cg19190016 | cg17522727 | cg23439917 |
| 6033 | cg19190487 | cg17518949 | cg02463970 |
| 6034 | cg19200440 | cg17467243 | cg04546061 |
| 6035 | cg19201144 | cg17418956 | cg17857870 |
| 6036 | cg19201770 | cg17375396 | cg23333146 |
| 6037 | cg19219672 | cg17322655 | cg26365854 |
| 6038 | cg19235974 | cg17319576 | cg10872457 |
| 6039 | cg19238415 | cg17297775 | cg21385052 |

|      |            |            |            |
|------|------------|------------|------------|
| 6040 | cg19239692 | cg17297354 | cg21784096 |
| 6041 | cg19242568 | cg17284725 | cg16564132 |
| 6042 | cg19244553 | cg17018661 | cg06891043 |
| 6043 | cg19253339 | cg16919420 | cg16381321 |
| 6044 | cg19257111 | cg16831894 | cg26129303 |
| 6045 | cg19259111 | cg16773043 | cg02272457 |
| 6046 | cg19262818 | cg16672557 | cg07284519 |
| 6047 | cg19266014 | cg16664095 | cg23825482 |
| 6048 | cg19270309 | cg16650096 | cg16023107 |
| 6049 | cg19270505 | cg16563454 | cg21032292 |
| 6050 | cg19271753 | cg16535788 | cg03148858 |
| 6051 | cg19277672 | cg16521032 | cg14119680 |
| 6052 | cg19284767 | cg16459391 | cg17375396 |
| 6053 | cg19287817 | cg16391182 | cg00706207 |
| 6054 | cg19288921 | cg16292933 | cg24035682 |
| 6055 | cg19289969 | cg16242615 | cg08193650 |
| 6056 | cg19293468 | cg16213787 | cg08771923 |
| 6057 | cg19296501 | cg16117028 | cg02633409 |
| 6058 | cg19303748 | cg16078836 | cg06760467 |
| 6059 | cg19308185 | cg15959921 | cg22651048 |
| 6060 | cg19317226 | cg15935860 | cg21978195 |
| 6061 | cg19317433 | cg15772924 | cg24518264 |
| 6062 | cg19319067 | cg15737302 | cg26739233 |
| 6063 | cg19325477 | cg15686782 | cg09041614 |
| 6064 | cg19340420 | cg15646741 | cg02058267 |
| 6065 | cg19348272 | cg15556723 | cg25784372 |
| 6066 | cg19353949 | cg15485665 | cg18259487 |
| 6067 | cg19357094 | cg15478081 | cg19549465 |
| 6068 | cg19357195 | cg15470344 | cg22866998 |
| 6069 | cg19360685 | cg15446884 | cg22439641 |
| 6070 | cg19372504 | cg15408640 | cg24307703 |
| 6071 | cg19374752 | cg15389749 | cg05508315 |
| 6072 | cg19375196 | cg15283164 | cg19987219 |
| 6073 | cg19382919 | cg15277378 | cg24342377 |
| 6074 | cg19397321 | cg15264708 | cg16796135 |
| 6075 | cg19399165 | cg15181351 | cg21752525 |
| 6076 | cg19400179 | cg15174926 | cg23712594 |
| 6077 | cg19402179 | cg15127702 | cg01294717 |
| 6078 | cg19404500 | cg15104081 | cg06825317 |
| 6079 | cg19410796 | cg15016624 | cg04080724 |
| 6080 | cg19415091 | cg14966346 | cg01413698 |
| 6081 | cg19422138 | cg14960869 | cg25235326 |
| 6082 | cg19437281 | cg14875394 | cg11462099 |
| 6083 | cg19439043 | cg14843670 | cg13936383 |
| 6084 | cg19443475 | cg14706807 | cg19404500 |
| 6085 | cg19444998 | cg14644865 | cg27543578 |
| 6086 | cg19450111 | cg14547599 | cg16195091 |
| 6087 | cg19455322 | cg14521421 | cg24899558 |
| 6088 | cg19462352 | cg14505694 | cg19178876 |
| 6089 | cg19478343 | cg14502713 | cg14578363 |
| 6090 | cg19478410 | cg14455139 | cg01402099 |
| 6091 | cg19479935 | cg14425960 | cg03054026 |
| 6092 | cg19480117 | cg14413378 | cg16522491 |

|      |            |            |            |
|------|------------|------------|------------|
| 6093 | cg19482885 | cg14375387 | cg13378789 |
| 6094 | cg19486437 | cg14359798 | cg24154271 |
| 6095 | cg19486804 | cg14323199 | cg10311754 |
| 6096 | cg19489699 | cg14266952 | cg02560388 |
| 6097 | cg19500393 | cg14264901 | cg27294008 |
| 6098 | cg19502812 | cg14217074 | cg00372132 |
| 6099 | cg19503351 | cg14210001 | cg21574349 |
| 6100 | cg19507725 | cg14093663 | cg16995299 |
| 6101 | cg19508622 | cg14059835 | cg14543285 |
| 6102 | cg19509663 | cg14051367 | cg12219134 |
| 6103 | cg19512961 | cg14030593 | cg05591701 |
| 6104 | cg19513744 | cg14023774 | cg19956769 |
| 6105 | cg19514230 | cg13982956 | cg20333027 |
| 6106 | cg19514469 | cg13956443 | cg07290652 |
| 6107 | cg19515081 | cg13933043 | cg23696210 |
| 6108 | cg19528797 | cg13877631 | cg27100149 |
| 6109 | cg19529732 | cg13867915 | cg26832915 |
| 6110 | cg19532212 | cg13864546 | cg18539086 |
| 6111 | cg19536407 | cg13860981 | cg26313976 |
| 6112 | cg19536781 | cg13846358 | cg11888359 |
| 6113 | cg19539481 | cg13836318 | cg13724379 |
| 6114 | cg19541247 | cg13774342 | cg19049734 |
| 6115 | cg19548479 | cg13774184 | cg21856603 |
| 6116 | cg19548524 | cg13758724 | cg02734600 |
| 6117 | cg19553402 | cg13747145 | cg14375387 |
| 6118 | cg19560210 | cg13710553 | cg12736760 |
| 6119 | cg19561607 | cg13626676 | cg08573299 |
| 6120 | cg19565757 | cg13593436 | cg14781242 |
| 6121 | cg19567295 | cg13471336 | cg24135293 |
| 6122 | cg19572849 | cg13467292 | cg26778630 |
| 6123 | cg19573208 | cg13457217 | cg06013127 |
| 6124 | cg19577054 | cg13420004 | cg15878619 |
| 6125 | cg19577082 | cg13153540 | cg07104086 |
| 6126 | cg19577548 | cg13061648 | cg08619515 |
| 6127 | cg19582744 | cg12971523 | cg12732734 |
| 6128 | cg19584674 | cg12927785 | cg05267269 |
| 6129 | cg19585100 | cg12860109 | cg07915976 |
| 6130 | cg19589800 | cg12807855 | cg19478410 |
| 6131 | cg19593878 | cg12806728 | cg25934198 |
| 6132 | cg19594745 | cg12806353 | cg26585452 |
| 6133 | cg19598713 | cg12787036 | cg20242065 |
| 6134 | cg19598875 | cg12728606 | cg02534048 |
| 6135 | cg19604110 | cg12702354 | cg14093018 |
| 6136 | cg19605931 | cg12690127 | cg08970011 |
| 6137 | cg19611817 | cg12681370 | cg26546882 |
| 6138 | cg19618438 | cg12667792 | cg12964187 |
| 6139 | cg19622474 | cg12591125 | cg27611699 |
| 6140 | cg19623406 | cg12497581 | cg01055121 |
| 6141 | cg19629843 | cg12367539 | cg18241094 |
| 6142 | cg19631779 | cg12179884 | cg26656452 |
| 6143 | cg19632842 | cg12167489 | cg06591973 |
| 6144 | cg19638572 | cg12051710 | cg15247169 |
| 6145 | cg19646759 | cg11945474 | cg19125081 |

|      |            |            |            |
|------|------------|------------|------------|
| 6146 | cg19658812 | cg11940726 | cg17074958 |
| 6147 | cg19668990 | cg11908294 | cg15639581 |
| 6148 | cg19683675 | cg11869499 | cg10006956 |
| 6149 | cg19691659 | cg11816841 | cg18863119 |
| 6150 | cg19698242 | cg11564792 | cg13320257 |
| 6151 | cg19702703 | cg11535638 | cg27585557 |
| 6152 | cg19709083 | cg11497526 | cg02940164 |
| 6153 | cg19713140 | cg11468635 | cg21915998 |
| 6154 | cg19713196 | cg11436027 | cg21987921 |
| 6155 | cg19724698 | cg11360860 | cg23780635 |
| 6156 | cg19725377 | cg11313862 | cg00704869 |
| 6157 | cg19730379 | cg11284582 | cg24366425 |
| 6158 | cg19736117 | cg11237495 | cg01227084 |
| 6159 | cg19736226 | cg11218175 | cg18698681 |
| 6160 | cg19747992 | cg11174847 | cg18264298 |
| 6161 | cg19761272 | cg11151524 | cg09450022 |
| 6162 | cg19763281 | cg11101316 | cg05718035 |
| 6163 | cg19765175 | cg11095122 | cg09231120 |
| 6164 | cg19765378 | cg11046030 | cg16695570 |
| 6165 | cg19769521 | cg11016151 | cg02168436 |
| 6166 | cg19770281 | cg10990188 | cg22895198 |
| 6167 | cg19771975 | cg10904740 | cg15407257 |
| 6168 | cg19772651 | cg10859133 | cg18323018 |
| 6169 | cg19774846 | cg10836406 | cg10332704 |
| 6170 | cg19776793 | cg10820904 | cg00218484 |
| 6171 | cg19779886 | cg10811426 | cg05267394 |
| 6172 | cg19781117 | cg10805676 | cg23756143 |
| 6173 | cg19783160 | cg10731848 | cg06257110 |
| 6174 | cg19784198 | cg10730148 | cg20267732 |
| 6175 | cg19786422 | cg10550245 | cg23375717 |
| 6176 | cg19789753 | cg10529994 | cg25782041 |
| 6177 | cg19791606 | cg10496150 | cg17067528 |
| 6178 | cg19799865 | cg10408178 | cg24701662 |
| 6179 | cg19802929 | cg10370025 | cg01191157 |
| 6180 | cg19815596 | cg10361005 | cg13747145 |
| 6181 | cg19817882 | cg10360139 | cg06183287 |
| 6182 | cg19821361 | cg10357989 | cg11343506 |
| 6183 | cg19822716 | cg10278297 | cg12806353 |
| 6184 | cg19824396 | cg10227312 | cg19058262 |
| 6185 | cg19827089 | cg10218733 | cg05226061 |
| 6186 | cg19831403 | cg10213762 | cg13490227 |
| 6187 | cg19839325 | cg10147974 | cg23538755 |
| 6188 | cg19841423 | cg10053473 | cg27323343 |
| 6189 | cg19842026 | cg10024583 | cg16510440 |
| 6190 | cg19847601 | cg10000148 | cg16006963 |
| 6191 | cg19849478 | cg09970023 | cg04149585 |
| 6192 | cg19856705 | cg09801824 | cg16660312 |
| 6193 | cg19857461 | cg09703323 | cg01959071 |
| 6194 | cg19857633 | cg09685601 | cg24408316 |
| 6195 | cg19863040 | cg09650907 | cg13154622 |
| 6196 | cg19865472 | cg09607915 | cg26034516 |
| 6197 | cg19865916 | cg09581065 | cg27181295 |
| 6198 | cg19874640 | cg09551019 | cg19560210 |

|      |            |            |            |
|------|------------|------------|------------|
| 6199 | cg19878200 | cg09511351 | cg06869755 |
| 6200 | cg19879265 | cg09371084 | cg25264265 |
| 6201 | cg19892287 | cg09353705 | cg06504636 |
| 6202 | cg19895894 | cg09196257 | cg07384019 |
| 6203 | cg19909613 | cg09109553 | cg02872491 |
| 6204 | cg19912309 | cg09037712 | cg26015115 |
| 6205 | cg19918057 | cg09020697 | cg03035359 |
| 6206 | cg19925801 | cg08976646 | cg10611016 |
| 6207 | cg19931529 | cg08947774 | cg01835854 |
| 6208 | cg19931596 | cg08933276 | cg15410236 |
| 6209 | cg19937288 | cg08883078 | cg01338955 |
| 6210 | cg19940729 | cg08836353 | cg18645910 |
| 6211 | cg19944656 | cg08741843 | cg14003211 |
| 6212 | cg19949955 | cg08740008 | cg00095259 |
| 6213 | cg19950556 | cg08636203 | cg24448421 |
| 6214 | cg19961522 | cg08622923 | cg07714708 |
| 6215 | cg19970953 | cg08605347 | cg26890480 |
| 6216 | cg19974227 | cg08509383 | cg15127656 |
| 6217 | cg19975759 | cg08494755 | cg03143347 |
| 6218 | cg19987219 | cg08457169 | cg02878891 |
| 6219 | cg19988492 | cg08437802 | cg17482237 |
| 6220 | cg19991046 | cg08428985 | cg18492803 |
| 6221 | cg19992808 | cg08381596 | cg09335314 |
| 6222 | cg19995595 | cg08362308 | cg01449425 |
| 6223 | cg20000539 | cg08197880 | cg14219236 |
| 6224 | cg20000602 | cg08169341 | cg09109553 |
| 6225 | cg20000866 | cg08124986 | cg17654747 |
| 6226 | cg20005923 | cg08104146 | cg25749254 |
| 6227 | cg20008846 | cg07946977 | cg12240761 |
| 6228 | cg20010135 | cg07800359 | cg23046918 |
| 6229 | cg20011326 | cg07714708 | cg19629843 |
| 6230 | cg20017253 | cg07654843 | cg10865444 |
| 6231 | cg20018563 | cg07622079 | cg19565757 |
| 6232 | cg20027456 | cg07520608 | cg12806728 |
| 6233 | cg20027784 | cg07507493 | cg20731110 |
| 6234 | cg20030934 | cg07478501 | cg16265932 |
| 6235 | cg20048529 | cg07420867 | cg22272218 |
| 6236 | cg20049727 | cg07385490 | cg12790592 |
| 6237 | cg20051177 | cg07384019 | cg16517702 |
| 6238 | cg20060759 | cg07365071 | cg01810684 |
| 6239 | cg20061812 | cg07352757 | cg27637521 |
| 6240 | cg20067272 | cg07308243 | cg14037937 |
| 6241 | cg20067780 | cg07104557 | cg19123356 |
| 6242 | cg20068058 | cg07048516 | cg06887283 |
| 6243 | cg20069939 | cg07005960 | cg14001518 |
| 6244 | cg20070852 | cg06817454 | cg14294646 |
| 6245 | cg20076442 | cg06769510 | cg26909797 |
| 6246 | cg20078454 | cg06746318 | cg21307043 |
| 6247 | cg20080282 | cg06706550 | cg13070215 |
| 6248 | cg20090162 | cg06649282 | cg08180831 |
| 6249 | cg20090290 | cg06541938 | cg17276624 |
| 6250 | cg20095124 | cg06537744 | cg04196068 |
| 6251 | cg20099458 | cg06463230 | cg18583276 |

|      |            |            |            |
|------|------------|------------|------------|
| 6252 | cg20100049 | cg06460400 | cg14620138 |
| 6253 | cg20102955 | cg06439736 | cg06321304 |
| 6254 | cg20118577 | cg06340118 | cg19270505 |
| 6255 | cg20133730 | cg06328338 | cg00528490 |
| 6256 | cg20137441 | cg06310294 | cg21735384 |
| 6257 | cg20138711 | cg06292709 | cg09905732 |
| 6258 | cg20139145 | cg06252645 | cg06604690 |
| 6259 | cg20140662 | cg06120235 | cg18000764 |
| 6260 | cg20141509 | cg06094523 | cg23900422 |
| 6261 | cg20143111 | cg05931119 | cg09856367 |
| 6262 | cg20147164 | cg05915622 | cg26071556 |
| 6263 | cg20149780 | cg05851042 | cg23529249 |
| 6264 | cg20152304 | cg05755441 | cg18158033 |
| 6265 | cg20156139 | cg05738687 | cg15231872 |
| 6266 | cg20158671 | cg05727180 | cg14575741 |
| 6267 | cg20161791 | cg05662839 | cg27003787 |
| 6268 | cg20165037 | cg05615230 | cg10109146 |
| 6269 | cg20166714 | cg05601844 | cg02083676 |
| 6270 | cg20167126 | cg05517824 | cg26304689 |
| 6271 | cg20169015 | cg05515072 | cg05069728 |
| 6272 | cg20173014 | cg05493407 | cg06264060 |
| 6273 | cg20185083 | cg05364570 | cg19190487 |
| 6274 | cg20188546 | cg05350020 | cg07122529 |
| 6275 | cg20189937 | cg05346688 | cg17426166 |
| 6276 | cg20193802 | cg05305993 | cg01330448 |
| 6277 | cg20195046 | cg05289897 | cg06799533 |
| 6278 | cg20197694 | cg05220083 | cg22550309 |
| 6279 | cg20197756 | cg05141289 | cg12265604 |
| 6280 | cg20208009 | cg05091570 | cg06445533 |
| 6281 | cg20210151 | cg05073386 | cg16277922 |
| 6282 | cg20210637 | cg05062820 | cg01758022 |
| 6283 | cg20226512 | cg04966586 | cg00667680 |
| 6284 | cg20227592 | cg04874782 | cg18108009 |
| 6285 | cg20229025 | cg04837783 | cg20229025 |
| 6286 | cg20230305 | cg04777612 | cg01637244 |
| 6287 | cg20231900 | cg04745820 | cg11662712 |
| 6288 | cg20241952 | cg04717045 | cg06772578 |
| 6289 | cg20242065 | cg04679114 | cg03031182 |
| 6290 | cg20252837 | cg04612073 | cg19034028 |
| 6291 | cg20254251 | cg04601090 | cg07732097 |
| 6292 | cg20262021 | cg04590974 | cg20349803 |
| 6293 | cg20265951 | cg04568774 | cg23345038 |
| 6294 | cg20267732 | cg04512603 | cg17196448 |
| 6295 | cg20283716 | cg04505897 | cg25146042 |
| 6296 | cg20284937 | cg04437605 | cg18729086 |
| 6297 | cg20293725 | cg04399631 | cg07156484 |
| 6298 | cg20297053 | cg04390667 | cg26666292 |
| 6299 | cg20297670 | cg04353997 | cg15937073 |
| 6300 | cg20300776 | cg04349985 | cg21017775 |
| 6301 | cg20300794 | cg04334792 | cg20137237 |
| 6302 | cg20309339 | cg04194173 | cg19216851 |
| 6303 | cg20309371 | cg04156643 | cg03216474 |
| 6304 | cg20316440 | cg04149585 | cg23797615 |

|      |            |            |            |
|------|------------|------------|------------|
| 6305 | cg20320158 | cg04141218 | cg07204803 |
| 6306 | cg20322433 | cg04140297 | cg08914150 |
| 6307 | cg20322837 | cg04110886 | cg17673769 |
| 6308 | cg20329303 | cg03965207 | cg16391347 |
| 6309 | cg20333027 | cg03938110 | cg16167741 |
| 6310 | cg20334115 | cg03818193 | cg14078730 |
| 6311 | cg20336472 | cg03808580 | cg03231163 |
| 6312 | cg20338075 | cg03793055 | cg06179971 |
| 6313 | cg20338754 | cg03773809 | cg19841423 |
| 6314 | cg20342460 | cg03761162 | cg23171099 |
| 6315 | cg20349803 | cg03736944 | cg05978010 |
| 6316 | cg20354777 | cg03680680 | cg10018519 |
| 6317 | cg20370991 | cg03654273 | cg23252698 |
| 6318 | cg20379239 | cg03639964 | cg12467435 |
| 6319 | cg20382418 | cg03608003 | cg11527930 |
| 6320 | cg20382493 | cg03529015 | cg13420647 |
| 6321 | cg20390500 | cg03484435 | cg03177023 |
| 6322 | cg20396385 | cg03438101 | cg09746044 |
| 6323 | cg20397614 | cg03400139 | cg11995490 |
| 6324 | cg20407868 | cg03244796 | cg19573208 |
| 6325 | cg20412217 | cg03215657 | cg18659450 |
| 6326 | cg20415947 | cg03199926 | cg04703974 |
| 6327 | cg20418529 | cg03108347 | cg23202545 |
| 6328 | cg20418769 | cg03089923 | cg07872947 |
| 6329 | cg20426710 | cg03029255 | cg13973594 |
| 6330 | cg20428133 | cg03017264 | cg09007161 |
| 6331 | cg20435464 | cg02958947 | cg10841956 |
| 6332 | cg20436707 | cg02910959 | cg01467882 |
| 6333 | cg20437892 | cg02742455 | cg00606396 |
| 6334 | cg20438460 | cg02733842 | cg12742209 |
| 6335 | cg20441046 | cg02730804 | cg05757474 |
| 6336 | cg20447038 | cg02725453 | cg25780982 |
| 6337 | cg20449048 | cg02659431 | cg18266458 |
| 6338 | cg20459543 | cg02627286 | cg27158462 |
| 6339 | cg20462191 | cg02613295 | cg02875487 |
| 6340 | cg20463808 | cg02588098 | cg23949216 |
| 6341 | cg20464155 | cg02509027 | cg16056849 |
| 6342 | cg20471017 | cg02493905 | cg01809895 |
| 6343 | cg20476021 | cg02454890 | cg06212213 |
| 6344 | cg20482280 | cg02244933 | cg25289803 |
| 6345 | cg20490386 | cg02225004 | cg12284521 |
| 6346 | cg20495333 | cg02157454 | cg27233847 |
| 6347 | cg20505457 | cg02102456 | cg13931531 |
| 6348 | cg20512713 | cg02084948 | cg04269351 |
| 6349 | cg20513080 | cg02084214 | cg11743827 |
| 6350 | cg20515846 | cg02060434 | cg16908801 |
| 6351 | cg20516209 | cg02025435 | cg06521357 |
| 6352 | cg20519665 | cg02021485 | cg17304712 |
| 6353 | cg20524889 | cg01959071 | cg01599714 |
| 6354 | cg20540235 | cg01946510 | cg03051577 |
| 6355 | cg20540306 | cg01932663 | cg16024937 |
| 6356 | cg20544097 | cg01924223 | cg13319468 |
| 6357 | cg20544406 | cg01885814 | cg23617947 |



|      |            |            |            |
|------|------------|------------|------------|
| 6358 | cg20548182 | cg01852611 | cg11360860 |
| 6359 | cg20560906 | cg01810684 | cg10664162 |
| 6360 | cg20566286 | cg01792229 | cg19765378 |
| 6361 | cg20566450 | cg01791238 | cg27263448 |
| 6362 | cg20567148 | cg01741616 | cg02197542 |
| 6363 | cg20571592 | cg01719663 | cg05869732 |
| 6364 | cg20579480 | cg01645401 | cg13728069 |
| 6365 | cg20586971 | cg01578585 | cg02807008 |
| 6366 | cg20588285 | cg01534871 | cg20193802 |
| 6367 | cg20592766 | cg01370334 | cg14419424 |
| 6368 | cg20593887 | cg01364674 | cg09258240 |
| 6369 | cg20594316 | cg01360115 | cg04804648 |
| 6370 | cg20595846 | cg01337736 | cg10453420 |
| 6371 | cg20600205 | cg01324452 | cg17838182 |
| 6372 | cg20602417 | cg01314597 | cg25271479 |
| 6373 | cg20608966 | cg01303055 | cg21736854 |
| 6374 | cg20634514 | cg01287012 | cg26653360 |
| 6375 | cg20637405 | cg01260603 | cg00947413 |
| 6376 | cg20647485 | cg01195672 | cg12367539 |
| 6377 | cg20650515 | cg01154505 | cg25920512 |
| 6378 | cg20654462 | cg01110955 | cg07353266 |
| 6379 | cg20658711 | cg01096199 | cg10063637 |
| 6380 | cg20662658 | cg01077713 | cg13668823 |
| 6381 | cg20663495 | cg01066494 | cg22243439 |
| 6382 | cg20664445 | cg01062651 | cg18474180 |
| 6383 | cg20667709 | cg01044293 | cg24673886 |
| 6384 | cg20668447 | cg01007781 | cg22280406 |
| 6385 | cg20668718 | cg00999267 | cg03142002 |
| 6386 | cg20669366 | cg00941900 | cg24678812 |
| 6387 | cg20675852 | cg00906241 | cg20138711 |
| 6388 | cg20677267 | cg00827581 | cg16820411 |
| 6389 | cg20677814 | cg00825317 | cg27440150 |
| 6390 | cg20679011 | cg00816182 | cg12642717 |
| 6391 | cg20679271 | cg00748072 | cg14166377 |
| 6392 | cg20679659 | cg00718694 | cg26721908 |
| 6393 | cg20686479 | cg00665106 | cg05767299 |
| 6394 | cg20690695 | cg00656603 | cg05757530 |
| 6395 | cg20692268 | cg00622702 | cg08134301 |
| 6396 | cg20700977 | cg00586700 | cg03129134 |
| 6397 | cg20703928 | cg00513981 | cg14201387 |
| 6398 | cg20713092 | cg00469547 | cg11218175 |
| 6399 | cg20723705 | cg00460268 | cg01580176 |
| 6400 | cg20725704 | cg00431813 | cg24657347 |
| 6401 | cg20731110 | cg00418613 | cg16734433 |
| 6402 | cg20732160 | cg00373245 | cg26207909 |
| 6403 | cg20733077 | cg00341297 | cg14081251 |
| 6404 | cg20733739 | cg00286717 | cg21171279 |
| 6405 | cg20738406 | cg00271177 | cg20188546 |
| 6406 | cg20739726 | cg00209623 | cg19598713 |
| 6407 | cg20741105 | cg00201819 | cg04007841 |
| 6408 | cg20745684 | cg00185413 | cg26970113 |
| 6409 | cg20751706 | cg00147160 | cg20095124 |
| 6410 | cg20756600 | cg00089486 | cg08365802 |

|      |            |            |            |
|------|------------|------------|------------|
| 6411 | cg20757748 | cg00013441 | cg14839830 |
| 6412 | cg20758651 | cg27662093 | cg07391023 |
| 6413 | cg20761844 | cg27655512 | cg00877758 |
| 6414 | cg20767977 | cg27571329 | cg20668447 |
| 6415 | cg20771808 | cg27565803 | cg08894401 |
| 6416 | cg20773915 | cg27434984 | cg05680710 |
| 6417 | cg20776543 | cg27403628 | cg21067905 |
| 6418 | cg20779414 | cg27290103 | cg08818866 |
| 6419 | cg20780180 | cg27273675 | cg00360324 |
| 6420 | cg20781516 | cg27216597 | cg10818702 |
| 6421 | cg20792436 | cg27146477 | cg07022478 |
| 6422 | cg20793665 | cg27082076 | cg04575609 |
| 6423 | cg20794957 | cg27049344 | cg08360599 |
| 6424 | cg20798249 | cg26974415 | cg24474622 |
| 6425 | cg20805475 | cg26974276 | cg02972941 |
| 6426 | cg20806143 | cg26969840 | cg15401523 |
| 6427 | cg20808227 | cg26931296 | cg00086171 |
| 6428 | cg20812052 | cg26927190 | cg05088513 |
| 6429 | cg20822767 | cg26909797 | cg13210578 |
| 6430 | cg20826610 | cg26888672 | cg14438213 |
| 6431 | cg20828052 | cg26767085 | cg22679474 |
| 6432 | cg20840795 | cg26726230 | cg16311946 |
| 6433 | cg20847114 | cg26697605 | cg10632728 |
| 6434 | cg20849855 | cg26673975 | cg09781414 |
| 6435 | cg20852364 | cg26666292 | cg26180843 |
| 6436 | cg20861822 | cg26585320 | cg16953473 |
| 6437 | cg20863668 | cg26573923 | cg14328761 |
| 6438 | cg20881888 | cg26543243 | cg17172949 |
| 6439 | cg20892492 | cg26540925 | cg14136214 |
| 6440 | cg20899781 | cg26529655 | cg02665727 |
| 6441 | cg20909380 | cg26419962 | cg10796068 |
| 6442 | cg20910352 | cg26398024 | cg20739726 |
| 6443 | cg20916068 | cg26361671 | cg19415091 |
| 6444 | cg20916646 | cg26315985 | cg02730804 |
| 6445 | cg20918463 | cg26267483 | cg00626390 |
| 6446 | cg20925383 | cg26234644 | cg26642540 |
| 6447 | cg20934096 | cg26222498 | cg06541938 |
| 6448 | cg20937296 | cg26218835 | cg07078758 |
| 6449 | cg20941528 | cg26214948 | cg21063361 |
| 6450 | cg20951650 | cg26172211 | cg14947411 |
| 6451 | cg20952105 | cg26152017 | cg25190718 |
| 6452 | cg20958959 | cg26129303 | cg26769720 |
| 6453 | cg20963020 | cg26079864 | cg17830812 |
| 6454 | cg20967819 | cg26026296 | cg17938607 |
| 6455 | cg20971998 | cg25945504 | cg03110167 |
| 6456 | cg20977024 | cg25921543 | cg08521178 |
| 6457 | cg20985758 | cg25903122 | cg16102706 |
| 6458 | cg20989443 | cg25892761 | cg06419732 |
| 6459 | cg20997320 | cg25875209 | cg11725852 |
| 6460 | cg21000919 | cg25784372 | cg02468821 |
| 6461 | cg21004924 | cg25765819 | cg07438999 |
| 6462 | cg21006686 | cg25739142 | cg27014538 |
| 6463 | cg21010028 | cg25568490 | cg24433265 |

|      |            |            |            |
|------|------------|------------|------------|
| 6464 | cg21011702 | cg25568066 | cg00437969 |
| 6465 | cg21011883 | cg25556841 | cg04914198 |
| 6466 | cg21015266 | cg25545917 | cg27177983 |
| 6467 | cg21017775 | cg25515317 | cg23197939 |
| 6468 | cg21031345 | cg25513535 | cg03078718 |
| 6469 | cg21032292 | cg25461775 | cg14899960 |
| 6470 | cg21032564 | cg25418363 | cg25011577 |
| 6471 | cg21035368 | cg25352714 | cg27395391 |
| 6472 | cg21040069 | cg25077823 | cg26060535 |
| 6473 | cg21043481 | cg24996315 | cg24349804 |
| 6474 | cg21045072 | cg24706522 | cg17101681 |
| 6475 | cg21048763 | cg24697460 | cg26002713 |
| 6476 | cg21057429 | cg24635581 | cg05816041 |
| 6477 | cg21063361 | cg24631518 | cg04287574 |
| 6478 | cg21067905 | cg24630426 | cg20068058 |
| 6479 | cg21069814 | cg24553775 | cg04628014 |
| 6480 | cg21070669 | cg24523322 | cg23133355 |
| 6481 | cg21080655 | cg24518609 | cg05949181 |
| 6482 | cg21089789 | cg24517989 | cg21108851 |
| 6483 | cg21092828 | cg24453600 | cg08841613 |
| 6484 | cg21095280 | cg24433265 | cg04547809 |
| 6485 | cg21105175 | cg24360745 | cg04023831 |
| 6486 | cg21118367 | cg24336730 | cg14616881 |
| 6487 | cg21133992 | cg24307703 | cg15336269 |
| 6488 | cg21143086 | cg24283049 | cg23598378 |
| 6489 | cg21145938 | cg24244854 | cg20528338 |
| 6490 | cg21155834 | cg24225455 | cg16106427 |
| 6491 | cg21156057 | cg24202221 | cg02162605 |
| 6492 | cg21158528 | cg24181389 | cg03535239 |
| 6493 | cg21158737 | cg24163668 | cg24319076 |
| 6494 | cg21159068 | cg24155123 | cg22450662 |
| 6495 | cg21163714 | cg24129923 | cg09580859 |
| 6496 | cg21163717 | cg24096323 | cg08037719 |
| 6497 | cg21165519 | cg24092282 | cg24194413 |
| 6498 | cg21168101 | cg24031446 | cg16975812 |
| 6499 | cg21170978 | cg23935261 | cg03381007 |
| 6500 | cg21171279 | cg23824902 | cg10877385 |
| 6501 | cg21176488 | cg23820560 | cg19512961 |
| 6502 | cg21177165 | cg23800573 | cg19827089 |
| 6503 | cg21177940 | cg23709782 | cg25938735 |
| 6504 | cg21185187 | cg23400222 | cg22136038 |
| 6505 | cg21189849 | cg23363971 | cg20099458 |
| 6506 | cg21196487 | cg23309670 | cg18058895 |
| 6507 | cg21201494 | cg23301563 | cg13070650 |
| 6508 | cg21205855 | cg23202545 | cg26194092 |
| 6509 | cg21211480 | cg23128056 | cg06870740 |
| 6510 | cg21214613 | cg23075506 | cg11174847 |
| 6511 | cg21222559 | cg23049758 | cg23681616 |
| 6512 | cg21223341 | cg22979083 | cg13537940 |
| 6513 | cg21225667 | cg22782017 | cg03961998 |
| 6514 | cg21228259 | cg22735889 | cg00229868 |
| 6515 | cg21230793 | cg22734014 | cg25952596 |
| 6516 | cg21235119 | cg22679890 | cg21222559 |

|      |            |            |            |
|------|------------|------------|------------|
| 6517 | cg21238609 | cg22666223 | cg18819574 |
| 6518 | cg21241424 | cg22651048 | cg12058043 |
| 6519 | cg21242508 | cg22616343 | cg25203085 |
| 6520 | cg21242663 | cg22599005 | cg20309339 |
| 6521 | cg21244322 | cg22584580 | cg05180954 |
| 6522 | cg21246624 | cg22582721 | cg15957394 |
| 6523 | cg21247923 | cg22532155 | cg26037660 |
| 6524 | cg21251203 | cg22490722 | cg21511816 |
| 6525 | cg21252105 | cg22295745 | cg00785831 |
| 6526 | cg21255128 | cg22280406 | cg22906113 |
| 6527 | cg21268578 | cg22252999 | cg25352924 |
| 6528 | cg21268659 | cg22237707 | cg10121745 |
| 6529 | cg21269763 | cg22213752 | cg09033641 |
| 6530 | cg21270847 | cg22192454 | cg09891393 |
| 6531 | cg21273407 | cg22119466 | cg17254904 |
| 6532 | cg21274136 | cg22046535 | cg26030804 |
| 6533 | cg21276022 | cg21964551 | cg13446070 |
| 6534 | cg21279756 | cg21945949 | cg13662225 |
| 6535 | cg21282907 | cg21925748 | cg12362980 |
| 6536 | cg21286967 | cg21794816 | cg09581065 |
| 6537 | cg21292981 | cg21787369 | cg01716084 |
| 6538 | cg21304766 | cg21779805 | cg12835599 |
| 6539 | cg21309147 | cg21730805 | cg06208229 |
| 6540 | cg21311736 | cg21676780 | cg20771808 |
| 6541 | cg21316772 | cg21617218 | cg02667880 |
| 6542 | cg21329649 | cg21585138 | cg17851345 |
| 6543 | cg21331845 | cg21535670 | cg08065374 |
| 6544 | cg21332304 | cg21404878 | cg26637901 |
| 6545 | cg21334198 | cg21388753 | cg08124923 |
| 6546 | cg21335012 | cg21316772 | cg20586531 |
| 6547 | cg21351483 | cg21309147 | cg04813695 |
| 6548 | cg21352006 | cg21274136 | cg10146112 |
| 6549 | cg21361322 | cg21244322 | cg06884199 |
| 6550 | cg21364077 | cg21223341 | cg08779982 |
| 6551 | cg21370924 | cg21214613 | cg14879569 |
| 6552 | cg21373806 | cg21156057 | cg15470344 |
| 6553 | cg21374048 | cg21026566 | cg03135948 |
| 6554 | cg21376658 | cg21010028 | cg24453600 |
| 6555 | cg21377260 | cg20909380 | cg10897631 |
| 6556 | cg21379004 | cg20776543 | cg18693479 |
| 6557 | cg21385052 | cg20721135 | cg05738687 |
| 6558 | cg21385606 | cg20634514 | cg14429457 |
| 6559 | cg21386766 | cg20512713 | cg24092444 |
| 6560 | cg21388753 | cg20482280 | cg00248856 |
| 6561 | cg21389456 | cg20463808 | cg14694342 |
| 6562 | cg21393818 | cg20387087 | cg05368595 |
| 6563 | cg21397287 | cg20338754 | cg18285813 |
| 6564 | cg21400851 | cg20284937 | cg24455383 |
| 6565 | cg21404476 | cg20189937 | cg01949455 |
| 6566 | cg21404878 | cg20161791 | cg27239280 |
| 6567 | cg21406967 | cg20102955 | cg18771839 |
| 6568 | cg21409449 | cg20090290 | cg03666500 |
| 6569 | cg21422871 | cg20067780 | cg13984005 |

|      |            |            |            |
|------|------------|------------|------------|
| 6570 | cg21434355 | cg20027456 | cg11258489 |
| 6571 | cg21437521 | cg20011326 | cg01288155 |
| 6572 | cg21438602 | cg19940729 | cg00786138 |
| 6573 | cg21439672 | cg19937288 | cg13413247 |
| 6574 | cg21442998 | cg19895894 | cg07754347 |
| 6575 | cg21445553 | cg19883388 | cg09687417 |
| 6576 | cg21457110 | cg19865916 | cg06443231 |
| 6577 | cg21460582 | cg19856705 | cg23108580 |
| 6578 | cg21460686 | cg19847601 | cg22099441 |
| 6579 | cg21464492 | cg19824396 | cg05317605 |
| 6580 | cg21474062 | cg19815596 | cg24126880 |
| 6581 | cg21475781 | cg19767562 | cg23687021 |
| 6582 | cg21492137 | cg19702703 | cg10057853 |
| 6583 | cg21497060 | cg19577548 | cg25122824 |
| 6584 | cg21497164 | cg19507725 | cg11706540 |
| 6585 | cg21500064 | cg19443475 | cg22961292 |
| 6586 | cg21504064 | cg19432283 | cg24747427 |
| 6587 | cg21513803 | cg19374752 | cg00585698 |
| 6588 | cg21526773 | cg19357094 | cg03933756 |
| 6589 | cg21528710 | cg19317433 | cg17203290 |
| 6590 | cg21528927 | cg19201144 | cg00259518 |
| 6591 | cg21532408 | cg19181160 | cg12267069 |
| 6592 | cg21535670 | cg19100996 | cg03538922 |
| 6593 | cg21535761 | cg19078853 | cg09685601 |
| 6594 | cg21544633 | cg19032492 | cg02696830 |
| 6595 | cg21546522 | cg18968623 | cg11116288 |
| 6596 | cg21546950 | cg18925548 | cg24104241 |
| 6597 | cg21552014 | cg18870258 | cg04872027 |
| 6598 | cg21557473 | cg18818075 | cg14598025 |
| 6599 | cg21558509 | cg18804667 | cg17589079 |
| 6600 | cg21560157 | cg18771839 | cg23206032 |
| 6601 | cg21562750 | cg18766210 | cg00869582 |
| 6602 | cg21574349 | cg18703227 | cg08480739 |
| 6603 | cg21585138 | cg18659450 | cg05711037 |
| 6604 | cg21591452 | cg18624777 | cg04541146 |
| 6605 | cg21593030 | cg18583329 | cg00226615 |
| 6606 | cg21593628 | cg18519450 | cg10977734 |
| 6607 | cg21597937 | cg18484068 | cg13708635 |
| 6608 | cg21611093 | cg18400889 | cg24925945 |
| 6609 | cg21617218 | cg18318722 | cg24606594 |
| 6610 | cg21618273 | cg18240528 | cg27101023 |
| 6611 | cg21619325 | cg18051825 | cg11459133 |
| 6612 | cg21620968 | cg18036710 | cg20341998 |
| 6613 | cg21637392 | cg17976731 | cg18118490 |
| 6614 | cg21642054 | cg17947599 | cg24047905 |
| 6615 | cg21643731 | cg17943672 | cg08826080 |
| 6616 | cg21647035 | cg17876645 | cg04924028 |
| 6617 | cg21648069 | cg17854510 | cg02353448 |
| 6618 | cg21650193 | cg17830812 | cg18243853 |
| 6619 | cg21667939 | cg17830810 | cg26132163 |
| 6620 | cg21676780 | cg17636309 | cg09035930 |
| 6621 | cg21687003 | cg17367884 | cg26071135 |
| 6622 | cg21697252 | cg17334762 | cg12093220 |

|      |            |            |             |
|------|------------|------------|-------------|
| 6623 | cg21719704 | cg17315679 | cg01804278  |
| 6624 | cg21725701 | cg17289222 | cg12166802  |
| 6625 | cg21727276 | cg17264541 | cg08775774  |
| 6626 | cg21730805 | cg17095737 | cg01942927  |
| 6627 | cg21735384 | cg17074958 | cg13055385  |
| 6628 | cg21736854 | cg17036641 | cg26529094  |
| 6629 | cg21740826 | cg16989380 | cg05016508  |
| 6630 | cg21747549 | cg16960291 | cg14260162  |
| 6631 | cg21747652 | cg16949378 | cg26977086  |
| 6632 | cg21751147 | cg16874347 | cg04099803  |
| 6633 | cg21752525 | cg16828491 | cg09043524  |
| 6634 | cg21756355 | cg16776981 | cg27423208  |
| 6635 | cg21756765 | cg16726039 | cg27146036  |
| 6636 | cg21757281 | cg16681436 | cg14811014  |
| 6637 | cg21759907 | cg16580681 | cg07586345  |
| 6638 | cg21768835 | cg16566899 | cg01697623  |
| 6639 | cg21770322 | cg16533510 | cg17315679  |
| 6640 | cg21779805 | cg16532399 | cg20999795  |
| 6641 | cg21784096 | cg16476700 | cg18977727  |
| 6642 | cg21787369 | cg16289101 | cg00906241  |
| 6643 | cg21789440 | cg16269776 | cg00545796  |
| 6644 | cg21793437 | cg16212219 | cg00423871  |
| 6645 | cg21794816 | cg16145211 | cg03260744  |
| 6646 | cg21805118 | cg16052388 | cg19513582  |
| 6647 | cg21806238 | cg16026212 | cg03991120  |
| 6648 | cg21806750 | cg16016960 | cg20285745  |
| 6649 | cg21811911 | cg15970890 | cg13483248  |
| 6650 | cg21818807 | cg15937073 | cg255556841 |
| 6651 | cg21831649 | cg15888693 | cg12938917  |
| 6652 | cg21837323 | cg15879620 | cg27538859  |
| 6653 | cg21840948 | cg15874302 | cg06969777  |
| 6654 | cg21845869 | cg15657100 | cg26007445  |
| 6655 | cg21847393 | cg15656769 | cg26419962  |
| 6656 | cg21850879 | cg15632675 | cg25311162  |
| 6657 | cg21854332 | cg15603885 | cg22122013  |
| 6658 | cg21855211 | cg15473017 | cg03472610  |
| 6659 | cg21856603 | cg15363996 | cg07020987  |
| 6660 | cg21863499 | cg15363973 | cg02157002  |
| 6661 | cg21870038 | cg15351186 | cg00688539  |
| 6662 | cg21874862 | cg15299233 | cg20027331  |
| 6663 | cg21879102 | cg15264991 | cg09540676  |
| 6664 | cg21881364 | cg15231872 | cg01856887  |
| 6665 | cg21889263 | cg15170442 | cg22748815  |
| 6666 | cg21893764 | cg15142430 | cg01298912  |
| 6667 | cg21897315 | cg15048900 | cg00008452  |
| 6668 | cg21903817 | cg14952488 | cg19051802  |
| 6669 | cg21906519 | cg14923398 | cg23782083  |
| 6670 | cg21915998 | cg14879279 | cg17724175  |
| 6671 | cg21927420 | cg14790609 | cg20149780  |
| 6672 | cg21929969 | cg14785464 | cg07038822  |
| 6673 | cg21936959 | cg14700524 | cg01432405  |
| 6674 | cg21942532 | cg14692854 | cg02481307  |
| 6675 | cg21947590 | cg14628049 | cg11633461  |

|      |            |            |            |
|------|------------|------------|------------|
| 6676 | cg21962025 | cg14610776 | cg20725704 |
| 6677 | cg21962953 | cg14578363 | cg24257168 |
| 6678 | cg21978195 | cg14577373 | cg01971085 |
| 6679 | cg21979773 | cg14469436 | cg25245161 |
| 6680 | cg21987921 | cg14403241 | cg08591538 |
| 6681 | cg21997465 | cg14350114 | cg06058262 |
| 6682 | cg21998505 | cg14340089 | cg05975710 |
| 6683 | cg22011888 | cg14337655 | cg25082361 |
| 6684 | cg22013790 | cg14334310 | cg25835936 |
| 6685 | cg22016731 | cg14331206 | cg04696969 |
| 6686 | cg22019569 | cg14329059 | cg00902427 |
| 6687 | cg22020227 | cg14320530 | cg25399818 |
| 6688 | cg22021794 | cg14288326 | cg01370334 |
| 6689 | cg22022181 | cg14287742 | cg05150667 |
| 6690 | cg22024295 | cg14282937 | cg05013912 |
| 6691 | cg22039204 | cg14249876 | cg08159271 |
| 6692 | cg22040672 | cg14204738 | cg13731108 |
| 6693 | cg22046535 | cg14204266 | cg27475586 |
| 6694 | cg22047282 | cg14178294 | cg20152304 |
| 6695 | cg22047338 | cg14178043 | cg17778120 |
| 6696 | cg22047766 | cg14119680 | cg11804414 |
| 6697 | cg22048683 | cg14095283 | cg00035923 |
| 6698 | cg22049753 | cg14059665 | cg07691914 |
| 6699 | cg22052672 | cg14010305 | cg03013188 |
| 6700 | cg22058664 | cg14003211 | cg00503920 |
| 6701 | cg22060153 | cg13980079 | cg16509072 |
| 6702 | cg22069262 | cg13957126 | cg13726456 |
| 6703 | cg22078934 | cg13951223 | cg21311736 |
| 6704 | cg22082745 | cg13857933 | cg02187822 |
| 6705 | cg22083335 | cg13823144 | cg22584582 |
| 6706 | cg22095128 | cg13786171 | cg03782662 |
| 6707 | cg22097225 | cg13763482 | cg08103691 |
| 6708 | cg22099441 | cg13672348 | cg03215657 |
| 6709 | cg22108360 | cg13658093 | cg12293340 |
| 6710 | cg22118416 | cg13653963 | cg03267954 |
| 6711 | cg22119466 | cg13642849 | cg22944823 |
| 6712 | cg22122013 | cg13639866 | cg22660619 |
| 6713 | cg22123915 | cg13630560 | cg00059024 |
| 6714 | cg22133366 | cg13542073 | cg00783706 |
| 6715 | cg22150680 | cg13533142 | cg22838354 |
| 6716 | cg22151881 | cg13509456 | cg02367992 |
| 6717 | cg22153312 | cg13490227 | cg16919420 |
| 6718 | cg22154992 | cg13476204 | cg09198138 |
| 6719 | cg22161706 | cg13475704 | cg23601586 |
| 6720 | cg22169866 | cg13472900 | cg08119777 |
| 6721 | cg22171607 | cg13429555 | cg25627714 |
| 6722 | cg22186291 | cg13420647 | cg10088715 |
| 6723 | cg22189544 | cg13413247 | cg17886413 |
| 6724 | cg22192454 | cg13409409 | cg17524821 |
| 6725 | cg22194948 | cg13223682 | cg26685539 |
| 6726 | cg22197033 | cg13210578 | cg02192555 |
| 6727 | cg22202031 | cg13190879 | cg26144207 |
| 6728 | cg22204453 | cg13175060 | cg02010686 |

|      |            |            |            |
|------|------------|------------|------------|
| 6729 | cg22213752 | cg13116061 | cg25575145 |
| 6730 | cg22215392 | cg13096278 | cg26969840 |
| 6731 | cg22217449 | cg13086402 | cg24613083 |
| 6732 | cg22221847 | cg13080151 | cg08590257 |
| 6733 | cg22237707 | cg13054419 | cg18019825 |
| 6734 | cg22240998 | cg13050716 | cg25625457 |
| 6735 | cg22243439 | cg13039539 | cg02469916 |
| 6736 | cg22245494 | cg13038544 | cg25921543 |
| 6737 | cg22247495 | cg12964187 | cg24424381 |
| 6738 | cg22251048 | cg12843033 | cg12069132 |
| 6739 | cg22252999 | cg12590668 | cg03984919 |
| 6740 | cg22253401 | cg12456379 | cg14165633 |
| 6741 | cg22255690 | cg12204166 | cg17817350 |
| 6742 | cg22272218 | cg12136716 | cg12417362 |
| 6743 | cg22277106 | cg12075498 | cg13716849 |
| 6744 | cg22280406 | cg12049462 | cg09459955 |
| 6745 | cg22288012 | cg12025243 | cg05415131 |
| 6746 | cg22289815 | cg11976592 | cg09018739 |
| 6747 | cg22295745 | cg11844464 | cg16681083 |
| 6748 | cg22304169 | cg11706540 | cg08062713 |
| 6749 | cg22305797 | cg11671308 | cg11601967 |
| 6750 | cg22315164 | cg11632592 | cg11583751 |
| 6751 | cg22323067 | cg11601967 | cg16902190 |
| 6752 | cg22329743 | cg11524428 | cg08975850 |
| 6753 | cg22330533 | cg11497017 | cg08365388 |
| 6754 | cg22342925 | cg11490944 | cg14016879 |
| 6755 | cg22343299 | cg11468233 | cg07511723 |
| 6756 | cg22345063 | cg11462099 | cg26974441 |
| 6757 | cg22356839 | cg11409060 | cg13517605 |
| 6758 | cg22365446 | cg11341086 | cg10065736 |
| 6759 | cg22366375 | cg11319760 | cg07841877 |
| 6760 | cg22371518 | cg11272874 | cg13823144 |
| 6761 | cg22376204 | cg11252765 | cg21269763 |
| 6762 | cg22379668 | cg11087939 | cg19503351 |
| 6763 | cg22380476 | cg11046578 | cg23784046 |
| 6764 | cg22387323 | cg11041314 | cg21676780 |
| 6765 | cg22396663 | cg10997906 | cg03555203 |
| 6766 | cg22397446 | cg10925829 | cg24711397 |
| 6767 | cg22402769 | cg10841956 | cg04456245 |
| 6768 | cg22413209 | cg10828599 | cg10571824 |
| 6769 | cg22414151 | cg10810290 | cg26172211 |
| 6770 | cg22418565 | cg10810026 | cg12526346 |
| 6771 | cg22427797 | cg10709026 | cg10089081 |
| 6772 | cg22429169 | cg10673740 | cg12413156 |
| 6773 | cg22430861 | cg10664618 | cg14474966 |
| 6774 | cg22433862 | cg10563645 | cg04558973 |
| 6775 | cg22436253 | cg10511902 | cg19432283 |
| 6776 | cg22439641 | cg10488292 | cg14547599 |
| 6777 | cg22442617 | cg10472263 | cg19332409 |
| 6778 | cg22448292 | cg10458392 | cg03344672 |
| 6779 | cg22449085 | cg10427430 | cg09782637 |
| 6780 | cg22450662 | cg10392840 | cg10555744 |
| 6781 | cg22451265 | cg10378795 | cg24249775 |



|      |            |            |            |
|------|------------|------------|------------|
| 6782 | cg22459052 | cg10370426 | cg21616243 |
| 6783 | cg22459081 | cg10370305 | cg21962953 |
| 6784 | cg22461758 | cg10332437 | cg24209874 |
| 6785 | cg22466400 | cg10327980 | cg17775332 |
| 6786 | cg22472360 | cg10273135 | cg15488570 |
| 6787 | cg22482278 | cg10131972 | cg11864076 |
| 6788 | cg22488259 | cg10107322 | cg04473209 |
| 6789 | cg22490722 | cg10036892 | cg00919689 |
| 6790 | cg22501449 | cg10016364 | cg04880940 |
| 6791 | cg22512847 | cg09982918 | cg08877591 |
| 6792 | cg22515589 | cg09932436 | cg10194844 |
| 6793 | cg22516162 | cg09915232 | cg14864276 |
| 6794 | cg22521416 | cg09905732 | cg16668534 |
| 6795 | cg22525688 | cg09901532 | cg03417342 |
| 6796 | cg22528270 | cg09901529 | cg25104512 |
| 6797 | cg22532155 | cg09896867 | cg03683994 |
| 6798 | cg22532194 | cg09891393 | cg01454538 |
| 6799 | cg22539584 | cg09886931 | cg12591125 |
| 6800 | cg22542420 | cg09812790 | cg01017397 |
| 6801 | cg22546818 | cg09809922 | cg03031073 |
| 6802 | cg22550309 | cg09790512 | cg24939470 |
| 6803 | cg22555262 | cg09742751 | cg26815121 |
| 6804 | cg22558061 | cg09711421 | cg06407441 |
| 6805 | cg22562003 | cg09569347 | cg19585100 |
| 6806 | cg22563907 | cg09540676 | cg02693127 |
| 6807 | cg22575379 | cg09510085 | cg10213762 |
| 6808 | cg22576033 | cg09397692 | cg19822716 |
| 6809 | cg22579075 | cg09300185 | cg07741192 |
| 6810 | cg22582721 | cg09249800 | cg11699517 |
| 6811 | cg22584580 | cg09248660 | cg01267373 |
| 6812 | cg22584582 | cg09216143 | cg13832457 |
| 6813 | cg22591040 | cg09142117 | cg00920069 |
| 6814 | cg22593342 | cg09139451 | cg02648064 |
| 6815 | cg22599005 | cg09033641 | cg13584383 |
| 6816 | cg22616343 | cg09007161 | cg04398861 |
| 6817 | cg22619784 | cg08975850 | cg11661534 |
| 6818 | cg22622164 | cg08912841 | cg10202788 |
| 6819 | cg22622505 | cg08749599 | cg17256760 |
| 6820 | cg22622667 | cg08550729 | cg06981182 |
| 6821 | cg22628240 | cg08545132 | cg00550617 |
| 6822 | cg22639325 | cg08524717 | cg21847393 |
| 6823 | cg22644984 | cg08480739 | cg26408861 |
| 6824 | cg22651048 | cg08476843 | cg25301103 |
| 6825 | cg22655196 | cg08343075 | cg24429081 |
| 6826 | cg22657772 | cg08307171 | cg00085256 |
| 6827 | cg22660619 | cg08288016 | cg11248182 |
| 6828 | cg22666103 | cg08277216 | cg15678662 |
| 6829 | cg22666223 | cg08273640 | cg15712304 |
| 6830 | cg22679474 | cg08261841 | cg03457485 |
| 6831 | cg22679890 | cg08149747 | cg09602138 |
| 6832 | cg22685009 | cg08119777 | cg04372182 |
| 6833 | cg22686523 | cg07959741 | cg10980293 |
| 6834 | cg22699768 | cg07921503 | cg12807855 |

|      |            |            |            |
|------|------------|------------|------------|
| 6835 | cg22700246 | cg07910945 | cg22118369 |
| 6836 | cg22700848 | cg07904865 | cg26421310 |
| 6837 | cg22706186 | cg07867517 | cg06622892 |
| 6838 | cg22720481 | cg07803375 | cg10335736 |
| 6839 | cg22730007 | cg07736115 | cg26923754 |
| 6840 | cg22731637 | cg07582655 | cg08218971 |
| 6841 | cg22731981 | cg07552868 | cg15776300 |
| 6842 | cg22734014 | cg07549715 | cg01677310 |
| 6843 | cg22735889 | cg07547336 | cg17732877 |
| 6844 | cg22737001 | cg07530947 | cg03988952 |
| 6845 | cg22743617 | cg07478111 | cg23351271 |
| 6846 | cg22748815 | cg07471052 | cg08108655 |
| 6847 | cg22750845 | cg07396047 | cg22323067 |
| 6848 | cg22752049 | cg07338476 | cg01675694 |
| 6849 | cg22761077 | cg07329131 | cg16608596 |
| 6850 | cg22762745 | cg07267984 | cg14001914 |
| 6851 | cg22764700 | cg07166333 | cg03131732 |
| 6852 | cg22765117 | cg07148207 | cg01439112 |
| 6853 | cg22780675 | cg07077978 | cg04582672 |
| 6854 | cg22782017 | cg07067280 | cg11205589 |
| 6855 | cg22786631 | cg07058109 | cg13885965 |
| 6856 | cg22786667 | cg07043952 | cg03162779 |
| 6857 | cg22788065 | cg06943835 | cg22097225 |
| 6858 | cg22798362 | cg06931444 | cg01596854 |
| 6859 | cg22800332 | cg06907347 | cg13582959 |
| 6860 | cg22803510 | cg06894011 | cg23010693 |
| 6861 | cg22809726 | cg06863830 | cg25439867 |
| 6862 | cg22811647 | cg06799533 | cg19303748 |
| 6863 | cg22814801 | cg06776976 | cg14102880 |
| 6864 | cg22819824 | cg06753827 | cg04194173 |
| 6865 | cg22822599 | cg06753050 | cg27234648 |
| 6866 | cg22831256 | cg06746774 | cg24697460 |
| 6867 | cg22834511 | cg06711298 | cg00209918 |
| 6868 | cg22838354 | cg06702537 | cg17931529 |
| 6869 | cg22845855 | cg06660116 | cg19078037 |
| 6870 | cg22846498 | cg06607764 | cg22512847 |
| 6871 | cg22846611 | cg06522179 | cg02283353 |
| 6872 | cg22861317 | cg06355908 | cg25141943 |
| 6873 | cg22866998 | cg06246999 | cg01992684 |
| 6874 | cg22867608 | cg06090895 | cg08206098 |
| 6875 | cg22871566 | cg06038180 | cg17678224 |
| 6876 | cg22877380 | cg06033488 | cg22365446 |
| 6877 | cg22888023 | cg06024540 | cg04839616 |
| 6878 | cg22890896 | cg05976168 | cg25950520 |
| 6879 | cg22895198 | cg05968917 | cg19161559 |
| 6880 | cg22904096 | cg05966978 | cg21863499 |
| 6881 | cg22905571 | cg05960932 | cg25552768 |
| 6882 | cg22906113 | cg05846633 | cg08489478 |
| 6883 | cg22908423 | cg05801879 | cg19397321 |
| 6884 | cg22908922 | cg05800368 | cg22448292 |
| 6885 | cg22909085 | cg05771342 | cg06996896 |
| 6886 | cg22911054 | cg05770240 | cg18738548 |
| 6887 | cg22913843 | cg05714748 | cg20370991 |

|      |            |            |            |
|------|------------|------------|------------|
| 6888 | cg22916722 | cg05661968 | cg18461635 |
| 6889 | cg22918700 | cg05564438 | cg07329131 |
| 6890 | cg22921096 | cg05546878 | cg06793277 |
| 6891 | cg22932649 | cg05529922 | cg15444149 |
| 6892 | cg22937762 | cg05504354 | cg10980495 |
| 6893 | cg22942245 | cg05418719 | cg24391931 |
| 6894 | cg22944823 | cg05336268 | cg23454517 |
| 6895 | cg22961292 | cg05288253 | cg06292709 |
| 6896 | cg22964758 | cg05280797 | cg15473017 |
| 6897 | cg22971402 | cg05279866 | cg25883020 |
| 6898 | cg22974467 | cg05205532 | cg13433644 |
| 6899 | cg22977745 | cg05070608 | cg11628781 |
| 6900 | cg22979083 | cg05054460 | cg22253401 |
| 6901 | cg22979433 | cg05014846 | cg16824603 |
| 6902 | cg22982093 | cg04990420 | cg09672200 |
| 6903 | cg22986770 | cg04907595 | cg01404873 |
| 6904 | cg22986999 | cg04820362 | cg16395892 |
| 6905 | cg22987457 | cg04744514 | cg27143326 |
| 6906 | cg22989033 | cg04731861 | cg20555305 |
| 6907 | cg22990430 | cg04684246 | cg24073352 |
| 6908 | cg22990726 | cg04607844 | cg05541267 |
| 6909 | cg22992258 | cg04574046 | cg19611817 |
| 6910 | cg22998873 | cg04560531 | cg07221518 |
| 6911 | cg22999502 | cg04546061 | cg14285365 |
| 6912 | cg22999786 | cg04500730 | cg23125506 |
| 6913 | cg23003961 | cg04397652 | cg23626961 |
| 6914 | cg23010693 | cg04354126 | cg27269190 |
| 6915 | cg23019125 | cg04254198 | cg06078337 |
| 6916 | cg23021584 | cg04248364 | cg19640754 |
| 6917 | cg23028631 | cg04236512 | cg16773043 |
| 6918 | cg23029159 | cg04156383 | cg18340416 |
| 6919 | cg23032993 | cg04143348 | cg21274136 |
| 6920 | cg23036171 | cg04023831 | cg11432630 |
| 6921 | cg23037644 | cg03882967 | cg24586376 |
| 6922 | cg23039189 | cg03803102 | cg07347148 |
| 6923 | cg23040685 | cg03782662 | cg20189937 |
| 6924 | cg23046918 | cg03760490 | cg02595280 |
| 6925 | cg23049226 | cg03730709 | cg09526129 |
| 6926 | cg23049758 | cg03696370 | cg10332437 |
| 6927 | cg23053961 | cg03661299 | cg09335911 |
| 6928 | cg23058194 | cg03426226 | cg09073443 |
| 6929 | cg23058246 | cg03380744 | cg12062088 |
| 6930 | cg23058673 | cg03379681 | cg21246624 |
| 6931 | cg23066057 | cg03345925 | cg06124434 |
| 6932 | cg23072051 | cg03318937 | cg25203627 |
| 6933 | cg23075506 | cg03215152 | cg13374528 |
| 6934 | cg23085846 | cg03163819 | cg09729166 |
| 6935 | cg23087239 | cg03161498 | cg02817925 |
| 6936 | cg23087358 | cg03141944 | cg14519777 |
| 6937 | cg23089261 | cg03125765 | cg15214284 |
| 6938 | cg23092218 | cg03119829 | cg14010805 |
| 6939 | cg23093846 | cg03114711 | cg22078934 |
| 6940 | cg23100081 | cg03101580 | cg13758724 |

|      |            |            |            |
|------|------------|------------|------------|
| 6941 | cg23100428 | cg03052760 | cg10518527 |
| 6942 | cg23104930 | cg03031182 | cg22977745 |
| 6943 | cg23108580 | cg03031073 | cg16621790 |
| 6944 | cg23114772 | cg02958180 | cg06754496 |
| 6945 | cg23115933 | cg02872491 | cg00713247 |
| 6946 | cg23117250 | cg02832357 | cg08775793 |
| 6947 | cg23117583 | cg02734419 | cg00639837 |
| 6948 | cg23119433 | cg02471028 | cg07365071 |
| 6949 | cg23127694 | cg02274236 | cg10023624 |
| 6950 | cg23128056 | cg02255721 | cg01094351 |
| 6951 | cg23133355 | cg02193967 | cg15498121 |
| 6952 | cg23143093 | cg02187822 | cg19489699 |
| 6953 | cg23144649 | cg02153814 | cg23251296 |
| 6954 | cg23157618 | cg02116283 | cg02973735 |
| 6955 | cg23166740 | cg02084834 | cg00738945 |
| 6956 | cg23172911 | cg01983725 | cg17378535 |
| 6957 | cg23192604 | cg01971085 | cg27438218 |
| 6958 | cg23196346 | cg01849845 | cg24386905 |
| 6959 | cg23197939 | cg01838863 | cg10360139 |
| 6960 | cg23202053 | cg01835854 | cg15532236 |
| 6961 | cg23202545 | cg01819707 | cg00660140 |
| 6962 | cg23203730 | cg01710084 | cg10583144 |
| 6963 | cg23206032 | cg01655150 | cg09727436 |
| 6964 | cg23207527 | cg01637244 | cg21725701 |
| 6965 | cg23208152 | cg01628053 | cg05488981 |
| 6966 | cg23212751 | cg01617074 | cg11523191 |
| 6967 | cg23216122 | cg01494593 | cg02003272 |
| 6968 | cg23217547 | cg01483824 | cg22846498 |
| 6969 | cg23222247 | cg01460382 | cg24135645 |
| 6970 | cg23225637 | cg01449168 | cg23946462 |
| 6971 | cg23233631 | cg01330448 | cg13775299 |
| 6972 | cg23244464 | cg01204060 | cg13441142 |
| 6973 | cg23249399 | cg01188722 | cg06432200 |
| 6974 | cg23250528 | cg01104466 | cg21768835 |
| 6975 | cg23250795 | cg01084215 | cg18957751 |
| 6976 | cg23251296 | cg01077618 | cg18708810 |
| 6977 | cg23252698 | cg01044693 | cg08206881 |
| 6978 | cg23254569 | cg00912277 | cg02190127 |
| 6979 | cg23258611 | cg00899856 | cg15709435 |
| 6980 | cg23259001 | cg00876694 | cg05450563 |
| 6981 | cg23260554 | cg00870269 | cg09906558 |
| 6982 | cg23261102 | cg00861010 | cg02600978 |
| 6983 | cg23261343 | cg00851981 | cg05996835 |
| 6984 | cg23262213 | cg00639143 | cg23399441 |
| 6985 | cg23273465 | cg00592944 | cg06776976 |
| 6986 | cg23280999 | cg00582671 | cg09911521 |
| 6987 | cg23288298 | cg00581541 | cg05249271 |
| 6988 | cg23299804 | cg00414709 | cg02363969 |
| 6989 | cg23300494 | cg00412772 | cg26754071 |
| 6990 | cg23301563 | cg00410534 | cg22180848 |
| 6991 | cg23301979 | cg00285343 | cg18549386 |
| 6992 | cg23309670 | cg00187535 | cg02191483 |
| 6993 | cg23311929 | cg00147850 | cg24732123 |

|      |            |            |            |
|------|------------|------------|------------|
| 6994 | cg23313005 | cg00134602 | cg08924256 |
| 6995 | cg23316807 | cg00096810 | cg06524531 |
| 6996 | cg23322122 | cg00092644 | cg00460268 |
| 6997 | cg23332610 | cg27475586 | cg17956079 |
| 6998 | cg23333146 | cg27401116 | cg01493020 |
| 6999 | cg23337031 | cg27343801 | cg04156643 |
| 7000 | cg23339482 | cg27331828 | cg02832905 |
| 7001 | cg23339720 | cg27287951 | cg05350020 |
| 7002 | cg23344121 | cg27250037 | cg02785745 |
| 7003 | cg23345038 | cg27200466 | cg03789507 |
| 7004 | cg23350558 | cg27163630 | cg24299913 |
| 7005 | cg23350812 | cg27100149 | cg10756252 |
| 7006 | cg23357150 | cg27089352 | cg06120235 |
| 7007 | cg23362032 | cg27076552 | cg23475109 |
| 7008 | cg23363971 | cg26934759 | cg05445244 |
| 7009 | cg23366234 | cg26932586 | cg08105005 |
| 7010 | cg23366832 | cg26923754 | cg04966586 |
| 7011 | cg23372092 | cg26886188 | cg16398832 |
| 7012 | cg23375717 | cg26840755 | cg06562964 |
| 7013 | cg23378722 | cg26748583 | cg07181257 |
| 7014 | cg23385847 | cg26689934 | cg14239346 |
| 7015 | cg23386779 | cg26484017 | cg06173481 |
| 7016 | cg23388085 | cg26450275 | cg06812836 |
| 7017 | cg23393892 | cg26423824 | cg16653700 |
| 7018 | cg23397909 | cg26421310 | cg16392729 |
| 7019 | cg23398508 | cg26420566 | cg06797069 |
| 7020 | cg23399441 | cg26365784 | cg01207974 |
| 7021 | cg23399577 | cg26354947 | cg07685601 |
| 7022 | cg23400222 | cg26343721 | cg16237297 |
| 7023 | cg23401796 | cg26214074 | cg19360685 |
| 7024 | cg23408104 | cg26185621 | cg14420645 |
| 7025 | cg23429698 | cg26180006 | cg19274401 |
| 7026 | cg23439917 | cg26127166 | cg19874640 |
| 7027 | cg23454517 | cg26118698 | cg22639325 |
| 7028 | cg23455778 | cg26071135 | cg11865296 |
| 7029 | cg23460369 | cg25974922 | cg00556407 |
| 7030 | cg23463186 | cg25941751 | cg13572069 |
| 7031 | cg23464284 | cg25915512 | cg22449085 |
| 7032 | cg23466118 | cg25856632 | cg25729585 |
| 7033 | cg23468002 | cg25838968 | cg17700633 |
| 7034 | cg23470262 | cg25826644 | cg00866186 |
| 7035 | cg23475109 | cg25711239 | cg08176056 |
| 7036 | cg23475725 | cg25658272 | cg13573036 |
| 7037 | cg23476802 | cg25594106 | cg06377278 |
| 7038 | cg23484234 | cg25554340 | cg13071729 |
| 7039 | cg23485307 | cg25412310 | cg17793608 |
| 7040 | cg23490822 | cg25315148 | cg20349199 |
| 7041 | cg23492249 | cg25214584 | cg00418613 |
| 7042 | cg23493018 | cg25171014 | cg04926380 |
| 7043 | cg23493119 | cg25112643 | cg01570589 |
| 7044 | cg23507051 | cg25102842 | cg03379270 |
| 7045 | cg23509272 | cg25032991 | cg19462352 |
| 7046 | cg23510131 | cg25028527 | cg13576994 |

|      |            |            |            |
|------|------------|------------|------------|
| 7047 | cg23515921 | cg24925945 | cg15547344 |
| 7048 | cg23519637 | cg24900927 | cg03254566 |
| 7049 | cg23522522 | cg24771349 | cg02509027 |
| 7050 | cg23525541 | cg24768094 | cg10531372 |
| 7051 | cg23529249 | cg24747427 | cg25745246 |
| 7052 | cg23530850 | cg24705818 | cg06485166 |
| 7053 | cg23533073 | cg24701662 | cg08622923 |
| 7054 | cg23536830 | cg24586376 | cg05210671 |
| 7055 | cg23538755 | cg24530000 | cg07156006 |
| 7056 | cg23539753 | cg24528693 | cg17569754 |
| 7057 | cg23545258 | cg24391931 | cg02914790 |
| 7058 | cg23546343 | cg24299136 | cg02648939 |
| 7059 | cg23547892 | cg24298539 | cg04324917 |
| 7060 | cg23566503 | cg24287189 | cg20387087 |
| 7061 | cg23598378 | cg24212268 | cg12640387 |
| 7062 | cg23601586 | cg24093182 | cg23301979 |
| 7063 | cg23610994 | cg24015175 | cg25890936 |
| 7064 | cg23614979 | cg23990942 | cg09307742 |
| 7065 | cg23617947 | cg23987336 | cg05434397 |
| 7066 | cg23619577 | cg23750338 | cg03484435 |
| 7067 | cg23620047 | cg23681616 | cg20849855 |
| 7068 | cg23623681 | cg23666829 | cg16584688 |
| 7069 | cg23626908 | cg23623681 | cg25701364 |
| 7070 | cg23626961 | cg23492249 | cg20602417 |
| 7071 | cg23635789 | cg23475109 | cg02733842 |
| 7072 | cg23656110 | cg23470262 | cg13642849 |
| 7073 | cg23663547 | cg23399441 | cg25339408 |
| 7074 | cg23664774 | cg23258611 | cg01089364 |
| 7075 | cg23666829 | cg23216122 | cg04762676 |
| 7076 | cg23674358 | cg23197939 | cg16726039 |
| 7077 | cg23677881 | cg23115933 | cg01380884 |
| 7078 | cg23679798 | cg23087239 | cg12142346 |
| 7079 | cg23681616 | cg23032993 | cg12429455 |
| 7080 | cg23682934 | cg22987457 | cg06950392 |
| 7081 | cg23687021 | cg22987116 | cg26540302 |
| 7082 | cg23690480 | cg22963109 | cg21526773 |
| 7083 | cg23691781 | cg22961292 | cg05220083 |
| 7084 | cg23693485 | cg22911054 | cg25171014 |
| 7085 | cg23696210 | cg22786631 | cg05404787 |
| 7086 | cg23704085 | cg22429169 | cg18505837 |
| 7087 | cg23707719 | cg22277106 | cg17720554 |
| 7088 | cg23709782 | cg22251048 | cg25707005 |
| 7089 | cg23711760 | cg22136038 | cg20067272 |
| 7090 | cg23712594 | cg22047766 | cg25466396 |
| 7091 | cg23714019 | cg22024295 | cg13630646 |
| 7092 | cg23722792 | cg22009923 | cg02812189 |
| 7093 | cg23723410 | cg21997465 | cg06553975 |
| 7094 | cg23726802 | cg21755755 | cg04141218 |
| 7095 | cg23735646 | cg21752525 | cg18690282 |
| 7096 | cg23736055 | cg21650861 | cg24225455 |
| 7097 | cg23738548 | cg21619325 | cg23339482 |
| 7098 | cg23748172 | cg21606405 | cg16672557 |
| 7099 | cg23754431 | cg21497164 | cg20647485 |

|      |            |            |            |
|------|------------|------------|------------|
| 7100 | cg23755969 | cg21497060 | cg02970384 |
| 7101 | cg23760873 | cg21494132 | cg10510707 |
| 7102 | cg23777946 | cg21351483 | cg00694888 |
| 7103 | cg23779478 | cg21268659 | cg03853328 |
| 7104 | cg23780635 | cg21247923 | cg14249876 |
| 7105 | cg23782083 | cg21225667 | cg12694261 |
| 7106 | cg23783444 | cg21170978 | cg06705004 |
| 7107 | cg23784046 | cg21155834 | cg01789743 |
| 7108 | cg23797615 | cg21095280 | cg19242568 |
| 7109 | cg23800573 | cg21070669 | cg23087239 |
| 7110 | cg23811289 | cg21011883 | cg23664774 |
| 7111 | cg23812660 | cg20977024 | cg27008230 |
| 7112 | cg23812679 | cg20958959 | cg09627339 |
| 7113 | cg23818351 | cg20918463 | cg26181840 |
| 7114 | cg23820560 | cg20806143 | cg08282578 |
| 7115 | cg23824902 | cg20756600 | cg12692727 |
| 7116 | cg23825482 | cg20751706 | cg13381243 |
| 7117 | cg23827284 | cg20544097 | cg18259003 |
| 7118 | cg23828593 | cg20489239 | cg23690480 |
| 7119 | cg23834427 | cg20437892 | cg01023169 |
| 7120 | cg23834688 | cg20428133 | cg08381596 |
| 7121 | cg23835923 | cg20382493 | cg07026910 |
| 7122 | cg23844904 | cg20297670 | cg01017228 |
| 7123 | cg23850277 | cg20241952 | cg19005763 |
| 7124 | cg23854567 | cg20231900 | cg25964040 |
| 7125 | cg23873200 | cg20208009 | cg21000919 |
| 7126 | cg23881119 | cg20149780 | cg03731348 |
| 7127 | cg23886515 | cg20068058 | cg05989746 |
| 7128 | cg23887149 | cg20030934 | cg17732044 |
| 7129 | cg23894219 | cg19961522 | cg15065169 |
| 7130 | cg23895846 | cg19944656 | cg25115276 |
| 7131 | cg23900422 | cg19909613 | cg12051710 |
| 7132 | cg23902076 | cg19822716 | cg09473315 |
| 7133 | cg23903708 | cg19817882 | cg13864546 |
| 7134 | cg23906687 | cg19784013 | cg02823137 |
| 7135 | cg23906872 | cg19736117 | cg02421824 |
| 7136 | cg23908771 | cg19706515 | cg08994061 |
| 7137 | cg23910098 | cg19640754 | cg16184131 |
| 7138 | cg23910341 | cg19489699 | cg27059537 |
| 7139 | cg23916878 | cg19435621 | cg20924972 |
| 7140 | cg23920016 | cg19357195 | cg04560531 |
| 7141 | cg23925540 | cg19325477 | cg09775533 |
| 7142 | cg23935261 | cg19319067 | cg02041470 |
| 7143 | cg23936766 | cg19266014 | cg06787104 |
| 7144 | cg23939642 | cg19182035 | cg01066494 |
| 7145 | cg23939875 | cg18941831 | cg10676125 |
| 7146 | cg23945793 | cg18933685 | cg20283716 |
| 7147 | cg23946462 | cg18813518 | cg17740401 |
| 7148 | cg23947450 | cg18741439 | cg21163714 |
| 7149 | cg23949216 | cg18673163 | cg13456321 |
| 7150 | cg23951305 | cg18645910 | cg02979010 |
| 7151 | cg23954066 | cg18637761 | cg20241952 |
| 7152 | cg23956760 | cg18583276 | cg11909989 |

|      |            |            |            |
|------|------------|------------|------------|
| 7153 | cg23959115 | cg18543610 | cg24614218 |
| 7154 | cg23971517 | cg18539461 | cg05139219 |
| 7155 | cg23973885 | cg18503234 | cg12737285 |
| 7156 | cg23974819 | cg18485877 | cg00123317 |
| 7157 | cg23976499 | cg18482303 | cg13977320 |
| 7158 | cg23986590 | cg18406924 | cg00688979 |
| 7159 | cg23987336 | cg18348731 | cg06819431 |
| 7160 | cg23989207 | cg18272538 | cg10726559 |
| 7161 | cg23989757 | cg18250135 | cg09700054 |
| 7162 | cg23990272 | cg18222083 | cg03114711 |
| 7163 | cg23990942 | cg18132690 | cg10812717 |
| 7164 | cg23996800 | cg18069174 | cg15536489 |
| 7165 | cg23998645 | cg18030799 | cg17202706 |
| 7166 | cg23999526 | cg18027683 | cg13461247 |
| 7167 | cg24002003 | cg17985555 | cg23748751 |
| 7168 | cg24003508 | cg17972213 | cg10969245 |
| 7169 | cg24004007 | cg17850498 | cg00408764 |
| 7170 | cg24008544 | cg17827670 | cg27588653 |
| 7171 | cg24009250 | cg17818471 | cg22304169 |
| 7172 | cg24024036 | cg17787876 | cg18051825 |
| 7173 | cg24030630 | cg17671199 | cg16525330 |
| 7174 | cg24031446 | cg17574471 | cg06233301 |
| 7175 | cg24033503 | cg17525357 | cg01497892 |
| 7176 | cg24035682 | cg17444479 | cg26450275 |
| 7177 | cg24037270 | cg17179557 | cg11843948 |
| 7178 | cg24044501 | cg16962557 | cg02418175 |
| 7179 | cg24045498 | cg16876192 | cg13916961 |
| 7180 | cg24047905 | cg16824603 | cg17703629 |
| 7181 | cg24052817 | cg16747567 | cg12231088 |
| 7182 | cg24064506 | cg16694397 | cg15636859 |
| 7183 | cg24065957 | cg16616765 | cg19201770 |
| 7184 | cg24073352 | cg16509173 | cg04797170 |
| 7185 | cg24075760 | cg16496462 | cg02592525 |
| 7186 | cg24083817 | cg16496024 | cg25531618 |
| 7187 | cg24090911 | cg16381321 | cg10276623 |
| 7188 | cg24092282 | cg16340152 | cg11234767 |
| 7189 | cg24092444 | cg16316042 | cg07338476 |
| 7190 | cg24093176 | cg16274890 | cg23800573 |
| 7191 | cg24093182 | cg16258545 | cg10277646 |
| 7192 | cg24096323 | cg16255804 | cg06924233 |
| 7193 | cg24097241 | cg16237297 | cg11423998 |
| 7194 | cg24097814 | cg16223967 | cg09567735 |
| 7195 | cg24100115 | cg16222367 | cg15446884 |
| 7196 | cg24102222 | cg16207263 | cg26462488 |
| 7197 | cg24104241 | cg16195091 | cg14025149 |
| 7198 | cg24107411 | cg16183741 | cg08261841 |
| 7199 | cg24114708 | cg16074271 | cg13099829 |
| 7200 | cg24118850 | cg16071082 | cg23040685 |
| 7201 | cg24123198 | cg16023896 | cg26284638 |
| 7202 | cg24126880 | cg15991082 | cg03793055 |
| 7203 | cg24129923 | cg15975598 | cg06947205 |
| 7204 | cg24135645 | cg15957394 | cg24918798 |
| 7205 | cg24137511 | cg15904939 | cg09941367 |



|      |            |            |            |
|------|------------|------------|------------|
| 7206 | cg24137774 | cg15894581 | cg25443991 |
| 7207 | cg24148817 | cg15802323 | cg21457110 |
| 7208 | cg24152000 | cg15777335 | cg20462191 |
| 7209 | cg24154271 | cg15709435 | cg00400654 |
| 7210 | cg24155123 | cg15629568 | cg04220455 |
| 7211 | cg24158160 | cg15617336 | cg25453957 |
| 7212 | cg24163616 | cg15598425 | cg11215918 |
| 7213 | cg24163668 | cg15504666 | cg08692104 |
| 7214 | cg24175188 | cg15367698 | cg27068650 |
| 7215 | cg24181389 | cg15302379 | cg22622164 |
| 7216 | cg24183575 | cg15128510 | cg26281621 |
| 7217 | cg24186506 | cg15125438 | cg02495413 |
| 7218 | cg24191821 | cg15104211 | cg14244878 |
| 7219 | cg24194413 | cg15072038 | cg02010047 |
| 7220 | cg24194998 | cg15036118 | cg07964527 |
| 7221 | cg24197051 | cg15014006 | cg00428526 |
| 7222 | cg24202221 | cg14939765 | cg17947599 |
| 7223 | cg24209874 | cg14923274 | cg16499956 |
| 7224 | cg24212268 | cg14918743 | cg00270141 |
| 7225 | cg24212377 | cg14917100 | cg05547140 |
| 7226 | cg24215159 | cg14864276 | cg16535788 |
| 7227 | cg24215635 | cg14841828 | cg05661968 |
| 7228 | cg24220178 | cg14811011 | cg20828052 |
| 7229 | cg24225455 | cg14772050 | cg01046905 |
| 7230 | cg24233679 | cg14684166 | cg07104557 |
| 7231 | cg24244437 | cg14655044 | cg07042489 |
| 7232 | cg24247370 | cg14575741 | cg08293536 |
| 7233 | cg24247537 | cg14321522 | cg24930851 |
| 7234 | cg24253714 | cg14227418 | cg07962882 |
| 7235 | cg24257168 | cg14219236 | cg14734994 |
| 7236 | cg24259291 | cg14213430 | cg24957532 |
| 7237 | cg24260710 | cg14208133 | cg26951000 |
| 7238 | cg24264451 | cg14206983 | cg07160118 |
| 7239 | cg24268698 | cg14190128 | cg04982190 |
| 7240 | cg24270629 | cg14127396 | cg04460041 |
| 7241 | cg24271718 | cg14062119 | cg17766055 |
| 7242 | cg24275626 | cg14010805 | cg17803589 |
| 7243 | cg24276624 | cg13957538 | cg06753050 |
| 7244 | cg24283049 | cg13940218 | cg24450180 |
| 7245 | cg24287189 | cg13871900 | cg19486437 |
| 7246 | cg24288527 | cg13858803 | cg22761077 |
| 7247 | cg24289452 | cg13850871 | cg00885461 |
| 7248 | cg24293145 | cg13817905 | cg02216206 |
| 7249 | cg24294013 | cg13724379 | cg02910959 |
| 7250 | cg24295561 | cg13685294 | cg15141238 |
| 7251 | cg24297835 | cg13683219 | cg13133492 |
| 7252 | cg24298539 | cg13675389 | cg04125460 |
| 7253 | cg24299136 | cg13657981 | cg19515081 |
| 7254 | cg24299913 | cg13657004 | cg26516446 |
| 7255 | cg24301288 | cg13639244 | cg23208152 |
| 7256 | cg24304880 | cg13636986 | cg00904122 |
| 7257 | cg24307703 | cg13618880 | cg05051734 |
| 7258 | cg24314474 | cg13589431 | cg07192047 |

|      |            |            |            |
|------|------------|------------|------------|
| 7259 | cg24321688 | cg13573036 | cg10830021 |
| 7260 | cg24336730 | cg13555689 | cg04354126 |
| 7261 | cg24342377 | cg13554136 | cg13919369 |
| 7262 | cg24349804 | cg13526766 | cg13924326 |
| 7263 | cg24358599 | cg13447099 | cg16721977 |
| 7264 | cg24360745 | cg13446070 | cg06252645 |
| 7265 | cg24362347 | cg13402847 | cg19525780 |
| 7266 | cg24366425 | cg13392861 | cg08457169 |
| 7267 | cg24372256 | cg13352836 | cg09080909 |
| 7268 | cg24387101 | cg13283765 | cg06938890 |
| 7269 | cg24391931 | cg13276704 | cg16530165 |
| 7270 | cg24394336 | cg13232249 | cg14826031 |
| 7271 | cg24403487 | cg13194638 | cg15260437 |
| 7272 | cg24408200 | cg13170807 | cg17961835 |
| 7273 | cg24408316 | cg13139630 | cg01079658 |
| 7274 | cg24420089 | cg12927715 | cg13383819 |
| 7275 | cg24420164 | cg12901650 | cg09666417 |
| 7276 | cg24423806 | cg12778183 | cg21255128 |
| 7277 | cg24424381 | cg12742209 | cg26710819 |
| 7278 | cg24425316 | cg12728588 | cg07012725 |
| 7279 | cg24429037 | cg12650685 | cg11792186 |
| 7280 | cg24429081 | cg12629008 | cg03253309 |
| 7281 | cg24433265 | cg12481567 | cg25118879 |
| 7282 | cg24437408 | cg12469964 | cg06577703 |
| 7283 | cg24437859 | cg12459932 | cg09828346 |
| 7284 | cg24448421 | cg12375903 | cg05324992 |
| 7285 | cg24450180 | cg12356870 | cg23244877 |
| 7286 | cg24453118 | cg12339425 | cg18514164 |
| 7287 | cg24453600 | cg12161625 | cg02399294 |
| 7288 | cg24455383 | cg12106976 | cg13287523 |
| 7289 | cg24463664 | cg12069132 | cg14588828 |
| 7290 | cg24469719 | cg11966063 | cg17442932 |
| 7291 | cg24474622 | cg11958668 | cg26452091 |
| 7292 | cg24479752 | cg11898009 | cg27226927 |
| 7293 | cg24482246 | cg11888747 | cg06572904 |
| 7294 | cg24495350 | cg11879277 | cg01876978 |
| 7295 | cg24499677 | cg11843948 | cg26423542 |
| 7296 | cg24502047 | cg11834956 | cg04352763 |
| 7297 | cg24517989 | cg11828470 | cg19892287 |
| 7298 | cg24518264 | cg11819469 | cg01062470 |
| 7299 | cg24518609 | cg11809476 | cg21445553 |
| 7300 | cg24523322 | cg11804414 | cg02829456 |
| 7301 | cg24525461 | cg11777290 | cg11544882 |
| 7302 | cg24528693 | cg11719457 | cg18752987 |
| 7303 | cg24530000 | cg11592377 | cg24289452 |
| 7304 | cg24544986 | cg11576988 | cg26321613 |
| 7305 | cg24549289 | cg11523661 | cg04214430 |
| 7306 | cg24550880 | cg11381282 | cg05856230 |
| 7307 | cg24553775 | cg11363168 | cg23304923 |
| 7308 | cg24562682 | cg11143193 | cg09159050 |
| 7309 | cg24586376 | cg11088489 | cg06131879 |
| 7310 | cg24586870 | cg11046864 | cg05060427 |
| 7311 | cg24589334 | cg11028291 | cg11952908 |

|      |            |            |            |
|------|------------|------------|------------|
| 7312 | cg24590353 | cg11007190 | cg13508949 |
| 7313 | cg24595704 | cg10989175 | cg18428888 |
| 7314 | cg24606594 | cg10960375 | cg27380631 |
| 7315 | cg24614218 | cg10959933 | cg18485872 |
| 7316 | cg24617568 | cg10862981 | cg16125397 |
| 7317 | cg24619276 | cg10860364 | cg16965936 |
| 7318 | cg24625084 | cg10836809 | cg13177873 |
| 7319 | cg24628866 | cg10829693 | cg01503773 |
| 7320 | cg24629431 | cg10827094 | cg19057779 |
| 7321 | cg24630383 | cg10798745 | cg00618323 |
| 7322 | cg24635581 | cg10786098 | cg08507725 |
| 7323 | cg24639863 | cg10754670 | cg19925801 |
| 7324 | cg24647108 | cg10738865 | cg25230305 |
| 7325 | cg24648594 | cg10589745 | cg19865916 |
| 7326 | cg24657347 | cg10585257 | cg04334792 |
| 7327 | cg24659758 | cg10531372 | cg13360638 |
| 7328 | cg24670927 | cg10512089 | cg17560283 |
| 7329 | cg24673886 | cg10418812 | cg26410484 |
| 7330 | cg24674087 | cg10388307 | cg01449168 |
| 7331 | cg24678812 | cg10277646 | cg26018322 |
| 7332 | cg24691835 | cg10248148 | cg18098187 |
| 7333 | cg24701232 | cg10082525 | cg03318937 |
| 7334 | cg24701662 | cg10034572 | cg23620047 |
| 7335 | cg24705818 | cg09988676 | cg00647879 |
| 7336 | cg24706188 | cg09935792 | cg08334780 |
| 7337 | cg24706522 | cg09925620 | cg08276889 |
| 7338 | cg24706981 | cg09790523 | cg16161135 |
| 7339 | cg24709718 | cg09776314 | cg17980999 |
| 7340 | cg24711397 | cg09746044 | cg02883198 |
| 7341 | cg24723883 | cg09697259 | cg25637473 |
| 7342 | cg24724937 | cg09672200 | cg15086474 |
| 7343 | cg24727133 | cg09580859 | cg08899531 |
| 7344 | cg24728456 | cg09499482 | cg17112404 |
| 7345 | cg24730224 | cg09342325 | cg16078836 |
| 7346 | cg24732123 | cg09335314 | cg06996029 |
| 7347 | cg24734735 | cg09327610 | cg03182608 |
| 7348 | cg24738036 | cg09320595 | cg18798744 |
| 7349 | cg24738346 | cg09231120 | cg11898009 |
| 7350 | cg24738592 | cg09214456 | cg05555455 |
| 7351 | cg24747427 | cg09140274 | cg09851241 |
| 7352 | cg24748448 | cg09076960 | cg14270348 |
| 7353 | cg24748868 | cg08966188 | cg25214584 |
| 7354 | cg24750887 | cg08934318 | cg03761162 |
| 7355 | cg24752354 | cg08864042 | cg15117891 |
| 7356 | cg24760753 | cg08836729 | cg25007781 |
| 7357 | cg24766229 | cg08812784 | cg18677278 |
| 7358 | cg24767368 | cg08782674 | cg23463186 |
| 7359 | cg24768094 | cg08768904 | cg15834460 |
| 7360 | cg24771349 | cg08767627 | cg18732855 |
| 7361 | cg24775327 | cg08692104 | cg07285148 |
| 7362 | cg24783499 | cg08616663 | cg11060194 |
| 7363 | cg24787929 | cg08507725 | cg13815311 |
| 7364 | cg24804060 | cg08436467 | cg27631766 |

|      |            |            |            |
|------|------------|------------|------------|
| 7365 | cg24809845 | cg08435157 | cg20733739 |
| 7366 | cg24824472 | cg08397968 | cg05738470 |
| 7367 | cg24825262 | cg08360599 | cg21697252 |
| 7368 | cg24825937 | cg08091706 | cg16962557 |
| 7369 | cg24830876 | cg08067991 | cg13554136 |
| 7370 | cg24831140 | cg08062713 | cg04767697 |
| 7371 | cg24844449 | cg08007899 | cg04629141 |
| 7372 | cg24845165 | cg07912144 | cg08070235 |
| 7373 | cg24847636 | cg07850832 | cg27663249 |
| 7374 | cg24852135 | cg07770222 | cg00452755 |
| 7375 | cg24856699 | cg07731639 | cg20910352 |
| 7376 | cg24857399 | cg07716287 | cg20916068 |
| 7377 | cg24859433 | cg07701911 | cg10844382 |
| 7378 | cg24870662 | cg07661899 | cg13774342 |
| 7379 | cg24873093 | cg07624888 | cg15355859 |
| 7380 | cg24875415 | cg07613391 | cg09939191 |
| 7381 | cg24875593 | cg07549381 | cg23895846 |
| 7382 | cg24881255 | cg07505515 | cg11564792 |
| 7383 | cg24881558 | cg07468956 | cg25900150 |
| 7384 | cg24885442 | cg07467854 | cg24299136 |
| 7385 | cg24890045 | cg07391023 | cg06333135 |
| 7386 | cg24893073 | cg07290269 | cg03082830 |
| 7387 | cg24896649 | cg07281938 | cg25731074 |
| 7388 | cg24897108 | cg07279281 | cg10174191 |
| 7389 | cg24900927 | cg07230078 | cg05368971 |
| 7390 | cg24901995 | cg07156006 | cg02351425 |
| 7391 | cg24902250 | cg07152894 | cg01863398 |
| 7392 | cg24903767 | cg07139329 | cg05099221 |
| 7393 | cg24915915 | cg07129769 | cg03216729 |
| 7394 | cg24916358 | cg07125976 | cg19569551 |
| 7395 | cg24918798 | cg07050626 | cg09890746 |
| 7396 | cg24925163 | cg07042489 | cg04677227 |
| 7397 | cg24925945 | cg06996896 | cg09957712 |
| 7398 | cg24926689 | cg06895946 | cg21040069 |
| 7399 | cg24928546 | cg06856570 | cg07016298 |
| 7400 | cg24930851 | cg06823034 | cg07529658 |
| 7401 | cg24940138 | cg06710741 | cg26672794 |
| 7402 | cg24940701 | cg06586578 | cg02060039 |
| 7403 | cg24941195 | cg06549228 | cg01793617 |
| 7404 | cg24957532 | cg06524531 | cg08695912 |
| 7405 | cg24964215 | cg06509362 | cg27070508 |
| 7406 | cg24969902 | cg06483517 | cg26748583 |
| 7407 | cg24973993 | cg06406157 | cg13216372 |
| 7408 | cg24982682 | cg06342954 | cg07385490 |
| 7409 | cg24987440 | cg06294954 | cg05678033 |
| 7410 | cg24989405 | cg06267617 | cg04493177 |
| 7411 | cg24993140 | cg06212582 | cg09786420 |
| 7412 | cg24996315 | cg06154633 | cg07131274 |
| 7413 | cg24997330 | cg05909553 | cg24275626 |
| 7414 | cg24998879 | cg05899507 | cg24164238 |
| 7415 | cg25005357 | cg05874233 | cg20030934 |
| 7416 | cg25006254 | cg05862007 | cg01044693 |
| 7417 | cg25007422 | cg05858079 | cg08677140 |

|      |            |            |            |
|------|------------|------------|------------|
| 7418 | cg25007781 | cg05680710 | cg24738036 |
| 7419 | cg25010788 | cg05678033 | cg02156952 |
| 7420 | cg25013910 | cg05588341 | cg09505809 |
| 7421 | cg25032991 | cg05552543 | cg02034328 |
| 7422 | cg25033220 | cg05535123 | cg13642149 |
| 7423 | cg25038926 | cg05484458 | cg13210470 |
| 7424 | cg25045972 | cg05452742 | cg06309980 |
| 7425 | cg25048985 | cg05445244 | cg22009923 |
| 7426 | cg25053164 | cg05415936 | cg07296854 |
| 7427 | cg25059445 | cg05399244 | cg11241684 |
| 7428 | cg25061701 | cg05272807 | cg05658807 |
| 7429 | cg25066224 | cg05150667 | cg03954280 |
| 7430 | cg25066857 | cg05035470 | cg16421359 |
| 7431 | cg25077823 | cg04997235 | cg10421435 |
| 7432 | cg25084760 | cg04835685 | cg18649632 |
| 7433 | cg25086418 | cg04724275 | cg25471740 |
| 7434 | cg25095994 | cg04696969 | cg15969277 |
| 7435 | cg25097308 | cg04665930 | cg22866068 |
| 7436 | cg25102842 | cg04654299 | cg06506523 |
| 7437 | cg25104512 | cg04627183 | cg11834956 |
| 7438 | cg25114693 | cg04600641 | cg17385318 |
| 7439 | cg25115276 | cg04575609 | cg05833851 |
| 7440 | cg25116615 | cg04536844 | cg03098159 |
| 7441 | cg25117523 | cg04476286 | cg11449408 |
| 7442 | cg25118879 | cg04440361 | cg24964215 |
| 7443 | cg25122824 | cg04366815 | cg25765819 |
| 7444 | cg25135706 | cg04348080 | cg01553866 |
| 7445 | cg25136955 | cg04324917 | cg10836406 |
| 7446 | cg25137314 | cg04323313 | cg16126178 |
| 7447 | cg25138553 | cg04285855 | cg09410453 |
| 7448 | cg25142010 | cg04226952 | cg22706186 |
| 7449 | cg25146042 | cg04157865 | cg14143441 |
| 7450 | cg25148456 | cg04078658 | cg11148096 |
| 7451 | cg25153629 | cg03985415 | cg05179396 |
| 7452 | cg25161092 | cg03984919 | cg17671199 |
| 7453 | cg25162533 | cg03950492 | cg07043952 |
| 7454 | cg25167447 | cg03933756 | cg19513744 |
| 7455 | cg25171014 | cg03899978 | cg19918057 |
| 7456 | cg25187161 | cg03815917 | cg22937762 |
| 7457 | cg25189085 | cg03798162 | cg11816841 |
| 7458 | cg25189808 | cg03765423 | cg14320530 |
| 7459 | cg25190718 | cg03763874 | cg10009737 |
| 7460 | cg25197500 | cg03644585 | cg19975759 |
| 7461 | cg25199850 | cg03608520 | cg00169184 |
| 7462 | cg25202370 | cg03576555 | cg09634481 |
| 7463 | cg25203085 | cg03549146 | cg18228456 |
| 7464 | cg25203627 | cg03417340 | cg14995235 |
| 7465 | cg25214584 | cg03384915 | cg04803994 |
| 7466 | cg25221919 | cg03370270 | cg15772924 |
| 7467 | cg25223552 | cg03339668 | cg19767562 |
| 7468 | cg25227364 | cg03296204 | cg24194998 |
| 7469 | cg25235326 | cg03286774 | cg18519450 |
| 7470 | cg25242498 | cg03284113 | cg05283542 |

|      |            |            |            |
|------|------------|------------|------------|
| 7471 | cg25246084 | cg03267954 | cg05291588 |
| 7472 | cg25247887 | cg03231163 | cg15322667 |
| 7473 | cg25249728 | cg03187301 | cg18442286 |
| 7474 | cg25261191 | cg03163783 | cg02660541 |
| 7475 | cg25264265 | cg03077533 | cg11980500 |
| 7476 | cg25268422 | cg03063946 | cg01032946 |
| 7477 | cg25270886 | cg02999082 | cg18703721 |
| 7478 | cg25271479 | cg02975060 | cg13593436 |
| 7479 | cg25281849 | cg02961707 | cg01188722 |
| 7480 | cg25283432 | cg02937548 | cg25739142 |
| 7481 | cg25285041 | cg02930033 | cg02725620 |
| 7482 | cg25286715 | cg02914790 | cg13657004 |
| 7483 | cg25287071 | cg02901002 | cg26159074 |
| 7484 | cg25289803 | cg02827340 | cg25692669 |
| 7485 | cg25296804 | cg02816525 | cg10107466 |
| 7486 | cg25301103 | cg02804722 | cg08552290 |
| 7487 | cg25306579 | cg02734600 | cg27146477 |
| 7488 | cg25310555 | cg02720600 | cg05971891 |
| 7489 | cg25311162 | cg02714192 | cg21404878 |
| 7490 | cg25312122 | cg02633409 | cg14087401 |
| 7491 | cg25315148 | cg02583282 | cg19239692 |
| 7492 | cg25316172 | cg02582619 | cg14638315 |
| 7493 | cg25317315 | cg02550308 | cg17234201 |
| 7494 | cg25321935 | cg02538557 | cg20588285 |
| 7495 | cg25323005 | cg02495413 | cg00876694 |
| 7496 | cg25341653 | cg02462933 | cg19539481 |
| 7497 | cg25346117 | cg02449166 | cg09646934 |
| 7498 | cg25350827 | cg02438575 | cg26808779 |
| 7499 | cg25350986 | cg02402630 | cg00747342 |
| 7500 | cg25352714 | cg02399294 | cg24589334 |
| 7501 | cg25352924 | cg02364610 | cg13028113 |
| 7502 | cg25355635 | cg02362505 | cg25223552 |
| 7503 | cg25363336 | cg02264288 | cg18820914 |
| 7504 | cg25369553 | cg02246916 | cg14461852 |
| 7505 | cg25372085 | cg02240936 | cg03975834 |
| 7506 | cg25372722 | cg02238387 | cg05364072 |
| 7507 | cg25382652 | cg02221422 | cg12787036 |
| 7508 | cg25383568 | cg02212339 | cg04600641 |
| 7509 | cg25386426 | cg02175033 | cg02645302 |
| 7510 | cg25389863 | cg02159643 | cg15465367 |
| 7511 | cg25390243 | cg02112621 | cg01153620 |
| 7512 | cg25399818 | cg02069944 | cg19288921 |
| 7513 | cg25403283 | cg02047646 | cg23515921 |
| 7514 | cg25405238 | cg02013841 | cg05634149 |
| 7515 | cg25406657 | cg01930924 | cg10724774 |
| 7516 | cg25408950 | cg01871631 | cg06914693 |
| 7517 | cg25409944 | cg01866330 | cg27410449 |
| 7518 | cg25412310 | cg01824603 | cg06085713 |
| 7519 | cg25413575 | cg01820765 | cg21475781 |
| 7520 | cg25418363 | cg01792640 | cg18851831 |
| 7521 | cg25424742 | cg01749725 | cg15553612 |
| 7522 | cg25430713 | cg01723163 | cg00955867 |
| 7523 | cg25431366 | cg01697623 | cg03528037 |

|      |            |            |            |
|------|------------|------------|------------|
| 7524 | cg25433222 | cg01693662 | cg27424692 |
| 7525 | cg25439867 | cg01589353 | cg05339066 |
| 7526 | cg25441338 | cg01577298 | cg13079633 |
| 7527 | cg25442652 | cg01514831 | cg02972475 |
| 7528 | cg25443991 | cg01483459 | cg02570361 |
| 7529 | cg25451660 | cg01482620 | cg15478081 |
| 7530 | cg25453957 | cg01452115 | cg25995420 |
| 7531 | cg25461775 | cg01449425 | cg13662628 |
| 7532 | cg25461827 | cg01428928 | cg11237495 |
| 7533 | cg25463863 | cg01402099 | cg06549228 |
| 7534 | cg25466396 | cg01337429 | cg26787096 |
| 7535 | cg25471740 | cg01309081 | cg05821186 |
| 7536 | cg25476129 | cg01254644 | cg12352896 |
| 7537 | cg25477334 | cg01194444 | cg24701232 |
| 7538 | cg25479682 | cg01138652 | cg19786422 |
| 7539 | cg25479732 | cg01023808 | cg20226512 |
| 7540 | cg25481201 | cg01017397 | cg07207742 |
| 7541 | cg25484139 | cg00959308 | cg27421679 |
| 7542 | cg25488990 | cg00955867 | cg14567593 |
| 7543 | cg25490527 | cg00954841 | cg27604101 |
| 7544 | cg25492112 | cg00936895 | cg07456413 |
| 7545 | cg25502179 | cg00919689 | cg05915622 |
| 7546 | cg25504217 | cg00902427 | cg13836318 |
| 7547 | cg25506288 | cg00857907 | cg20881888 |
| 7548 | cg25510609 | cg00852414 | cg19789753 |
| 7549 | cg25515317 | cg00845883 | cg25405238 |
| 7550 | cg25517015 | cg00777079 | cg03326699 |
| 7551 | cg25517187 | cg00715343 | cg22529541 |
| 7552 | cg25519921 | cg00670539 | cg13827597 |
| 7553 | cg25520910 | cg00657810 | cg13663738 |
| 7554 | cg25531618 | cg00648573 | cg04590974 |
| 7555 | cg25532627 | cg00589581 | cg19756253 |
| 7556 | cg25535708 | cg00550040 | cg22799860 |
| 7557 | cg25545917 | cg00423871 | cg10545738 |
| 7558 | cg25552705 | cg00408764 | cg08441269 |
| 7559 | cg25552768 | cg00374546 | cg26673975 |
| 7560 | cg25552843 | cg00366037 | cg22202031 |
| 7561 | cg25554340 | cg00286014 | cg05590948 |
| 7562 | cg25555068 | cg00244391 | cg04835685 |
| 7563 | cg25556841 | cg00244267 | cg04198125 |
| 7564 | cg25557739 | cg00143606 | cg13232249 |
| 7565 | cg25559625 | cg00137696 | cg10634182 |
| 7566 | cg25567021 | cg27548256 | cg16910448 |
| 7567 | cg25567674 | cg27538859 | cg10060631 |
| 7568 | cg25567938 | cg27458631 | cg20461270 |
| 7569 | cg25568490 | cg27421679 | cg02582619 |
| 7570 | cg25568745 | cg27390206 | cg25644380 |
| 7571 | cg25575145 | cg27380631 | cg04899175 |
| 7572 | cg25582924 | cg27378358 | cg16747567 |
| 7573 | cg25587431 | cg27271532 | cg23824902 |
| 7574 | cg25588387 | cg27221053 | cg00236831 |
| 7575 | cg25588389 | cg27213925 | cg01989275 |
| 7576 | cg25588826 | cg27146036 | cg14835545 |

|      |            |            |            |
|------|------------|------------|------------|
| 7577 | cg25589001 | cg27021553 | cg13248406 |
| 7578 | cg25591106 | cg27014538 | cg11936817 |
| 7579 | cg25591418 | cg26860182 | cg26607933 |
| 7580 | cg25594106 | cg26800893 | cg08073527 |
| 7581 | cg25594550 | cg26750188 | cg07598035 |
| 7582 | cg25595641 | cg26737223 | cg12279175 |
| 7583 | cg25596405 | cg26734040 | cg09897002 |
| 7584 | cg25600823 | cg26723735 | cg12371263 |
| 7585 | cg25604994 | cg26639076 | cg23704085 |
| 7586 | cg25606046 | cg26608486 | cg18467406 |
| 7587 | cg25607321 | cg26444806 | cg14208133 |
| 7588 | cg25613180 | cg26377276 | cg04902542 |
| 7589 | cg25616055 | cg26297299 | cg24425316 |
| 7590 | cg25617157 | cg26268565 | cg08248600 |
| 7591 | cg25619703 | cg26240231 | cg27364916 |
| 7592 | cg25623727 | cg26162025 | cg00013441 |
| 7593 | cg25627714 | cg26137103 | cg08143701 |
| 7594 | cg25629077 | cg26074140 | cg26932586 |
| 7595 | cg25634000 | cg26053547 | cg22942245 |
| 7596 | cg25635000 | cg26016985 | cg02426072 |
| 7597 | cg25637473 | cg26015115 | cg00936895 |
| 7598 | cg25638714 | cg26005197 | cg06332339 |
| 7599 | cg25642974 | cg25862117 | cg01494593 |
| 7600 | cg25644380 | cg25783610 | cg03158194 |
| 7601 | cg25649889 | cg25635000 | cg25591106 |
| 7602 | cg25652751 | cg25627714 | cg25517187 |
| 7603 | cg25654695 | cg25567674 | cg04958227 |
| 7604 | cg25658272 | cg25519921 | cg07097374 |
| 7605 | cg25661792 | cg25466396 | cg04633661 |
| 7606 | cg25666403 | cg25372722 | cg24107411 |
| 7607 | cg25668093 | cg25363336 | cg13922681 |
| 7608 | cg25688583 | cg25312122 | cg08964948 |
| 7609 | cg25692669 | cg25286715 | cg15389749 |
| 7610 | cg25701364 | cg25232510 | cg18253787 |
| 7611 | cg25707005 | cg25230305 | cg13488220 |
| 7612 | cg25711239 | cg25223552 | cg26342552 |
| 7613 | cg25713411 | cg25045972 | cg14297546 |
| 7614 | cg25714956 | cg25007781 | cg05322217 |
| 7615 | cg25719378 | cg24964215 | cg12514933 |
| 7616 | cg25722029 | cg24941195 | cg21450652 |
| 7617 | cg25723217 | cg24901995 | cg00007036 |
| 7618 | cg25729585 | cg24890045 | cg07041883 |
| 7619 | cg25730564 | cg24809845 | cg02635482 |
| 7620 | cg25731074 | cg24766229 | cg03834055 |
| 7621 | cg25739142 | cg24760753 | cg01314597 |
| 7622 | cg25739943 | cg24748448 | cg08603083 |
| 7623 | cg25745246 | cg24595704 | cg07261940 |
| 7624 | cg25754933 | cg24562682 | cg20985758 |
| 7625 | cg25761326 | cg24518264 | cg16496024 |
| 7626 | cg25763426 | cg24437859 | cg05823589 |
| 7627 | cg25765315 | cg24408200 | cg00935361 |
| 7628 | cg25765819 | cg24404329 | cg14199827 |
| 7629 | cg25780982 | cg24335984 | cg08544606 |



|      |            |            |            |
|------|------------|------------|------------|
| 7630 | cg25782041 | cg24276624 | cg07505515 |
| 7631 | cg25783610 | cg24253714 | cg07368061 |
| 7632 | cg25785495 | cg24220178 | cg02492708 |
| 7633 | cg25793812 | cg24215635 | cg16397629 |
| 7634 | cg25794830 | cg24183575 | cg02604890 |
| 7635 | cg25801976 | cg24126880 | cg12072973 |
| 7636 | cg25825612 | cg24092444 | cg26585320 |
| 7637 | cg25826644 | cg24033503 | cg27222884 |
| 7638 | cg25827936 | cg23957850 | cg27630540 |
| 7639 | cg25828334 | cg23835923 | cg20677814 |
| 7640 | cg25831522 | cg23828593 | cg22348713 |
| 7641 | cg25835936 | cg23736055 | cg00547768 |
| 7642 | cg25838968 | cg23714019 | cg26705574 |
| 7643 | cg25841625 | cg23704085 | cg08208595 |
| 7644 | cg25846061 | cg23693485 | cg07834408 |
| 7645 | cg25852019 | cg23663547 | cg26343721 |
| 7646 | cg25852715 | cg23635789 | cg08553857 |
| 7647 | cg25854527 | cg23598378 | cg21789440 |
| 7648 | cg25856632 | cg23545258 | cg08966413 |
| 7649 | cg25862117 | cg23515921 | cg20812052 |
| 7650 | cg25864762 | cg23486701 | cg05601844 |
| 7651 | cg25875209 | cg23401796 | cg22204453 |
| 7652 | cg25878830 | cg23332610 | cg08829140 |
| 7653 | cg25881985 | cg23203730 | cg26690672 |
| 7654 | cg25887811 | cg23157618 | cg19702383 |
| 7655 | cg25888386 | cg23108126 | cg01924223 |
| 7656 | cg25890936 | cg23100081 | cg05088794 |
| 7657 | cg25892761 | cg23066057 | cg24136288 |
| 7658 | cg25903122 | cg23029159 | cg01077618 |
| 7659 | cg25909064 | cg22999786 | cg09164574 |
| 7660 | cg25909885 | cg22918700 | cg06528340 |
| 7661 | cg25915512 | cg22909085 | cg23127694 |
| 7662 | cg25920512 | cg22890571 | cg08313842 |
| 7663 | cg25932290 | cg22877380 | cg09163478 |
| 7664 | cg25934198 | cg22822599 | cg07094993 |
| 7665 | cg25938735 | cg22822048 | cg17107501 |
| 7666 | cg25945499 | cg22686523 | cg25315148 |
| 7667 | cg25945504 | cg22488259 | cg23117250 |
| 7668 | cg25946646 | cg22450662 | cg27221053 |
| 7669 | cg25947619 | cg22449085 | cg05845879 |
| 7670 | cg25950520 | cg22387323 | cg06650364 |
| 7671 | cg25952596 | cg22367886 | cg17977133 |
| 7672 | cg25953130 | cg22243439 | cg08436467 |
| 7673 | cg25954194 | cg22217449 | cg25826644 |
| 7674 | cg25963540 | cg22152438 | cg22737001 |
| 7675 | cg25964040 | cg22069262 | cg02332902 |
| 7676 | cg25971741 | cg21874862 | cg26677892 |
| 7677 | cg25974922 | cg21768835 | cg03726437 |
| 7678 | cg25975823 | cg21570597 | cg22402769 |
| 7679 | cg25977879 | cg21476203 | cg04699214 |
| 7680 | cg25978487 | cg21389456 | cg20426710 |
| 7681 | cg25984524 | cg21361322 | cg09529783 |
| 7682 | cg25995420 | cg21334198 | cg07086112 |

|      |            |            |            |
|------|------------|------------|------------|
| 7683 | cg25998584 | cg20997320 | cg16711084 |
| 7684 | cg26001655 | cg20829550 | cg00669182 |
| 7685 | cg26002713 | cg20779414 | cg23421128 |
| 7686 | cg26005197 | cg20723705 | cg25261191 |
| 7687 | cg26007445 | cg20669366 | cg19011826 |
| 7688 | cg26011438 | cg20654462 | cg01422416 |
| 7689 | cg26013235 | cg20555305 | cg02217035 |
| 7690 | cg26014373 | cg20495333 | cg26856771 |
| 7691 | cg26015115 | cg20471017 | cg15016740 |
| 7692 | cg26016985 | cg20447038 | cg24137774 |
| 7693 | cg26018322 | cg20407868 | cg25481201 |
| 7694 | cg26019124 | cg20379239 | cg21352006 |
| 7695 | cg26026296 | cg20322837 | cg24724937 |
| 7696 | cg26030804 | cg20309371 | cg25801976 |
| 7697 | cg26034341 | cg20309339 | cg26428962 |
| 7698 | cg26034516 | cg20300032 | cg06371291 |
| 7699 | cg26041493 | cg20297053 | cg14772050 |
| 7700 | cg26053547 | cg20267732 | cg24372256 |
| 7701 | cg26053832 | cg20188546 | cg07917127 |
| 7702 | cg26060535 | cg20169015 | cg08157446 |
| 7703 | cg26064794 | cg20137237 | cg23244464 |
| 7704 | cg26066560 | cg19857461 | cg24825937 |
| 7705 | cg26068595 | cg19765378 | cg11519725 |
| 7706 | cg26070874 | cg19724698 | cg11270070 |
| 7707 | cg26071135 | cg19631779 | cg02124957 |
| 7708 | cg26071556 | cg19572849 | cg04624413 |
| 7709 | cg26074140 | cg19509663 | cg27466615 |
| 7710 | cg26075905 | cg19500393 | cg15232718 |
| 7711 | cg26079864 | cg19397321 | cg18108716 |
| 7712 | cg26092233 | cg19317226 | cg05960932 |
| 7713 | cg26097051 | cg19296662 | cg20679659 |
| 7714 | cg26104640 | cg19242568 | cg13765417 |
| 7715 | cg26105658 | cg19200440 | cg05968917 |
| 7716 | cg26118698 | cg19161559 | cg00374546 |
| 7717 | cg26120842 | cg19130981 | cg03629926 |
| 7718 | cg26127113 | cg19092603 | cg08469834 |
| 7719 | cg26127166 | cg19081470 | cg03358345 |
| 7720 | cg26129303 | cg19057916 | cg07109788 |
| 7721 | cg26132163 | cg18998442 | cg25739943 |
| 7722 | cg26133909 | cg18939081 | cg06586578 |
| 7723 | cg26137103 | cg18935449 | cg23947450 |
| 7724 | cg26143540 | cg18907942 | cg05714748 |
| 7725 | cg26144207 | cg18860847 | cg25033220 |
| 7726 | cg26147269 | cg18847089 | cg04724275 |
| 7727 | cg26152017 | cg18815879 | cg21228259 |
| 7728 | cg26152051 | cg18761976 | cg09915883 |
| 7729 | cg26152188 | cg18689614 | cg04410777 |
| 7730 | cg26159074 | cg18649632 | cg24181389 |
| 7731 | cg26160492 | cg18636829 | cg26446949 |
| 7732 | cg26162025 | cg18604419 | cg15911948 |
| 7733 | cg26166004 | cg18459869 | cg14778721 |
| 7734 | cg26169991 | cg18428888 | cg17743939 |
| 7735 | cg26172211 | cg18382744 | cg03736944 |

|      |            |            |            |
|------|------------|------------|------------|
| 7736 | cg26177041 | cg18264298 | cg05760053 |
| 7737 | cg26177754 | cg18253787 | cg14763173 |
| 7738 | cg26178184 | cg18248273 | cg22047766 |
| 7739 | cg26180843 | cg18091245 | cg15014006 |
| 7740 | cg26181840 | cg18055067 | cg01852611 |
| 7741 | cg26184501 | cg17993073 | cg11084269 |
| 7742 | cg26185621 | cg17958516 | cg21747549 |
| 7743 | cg26187123 | cg17857870 | cg07187503 |
| 7744 | cg26187194 | cg17846497 | cg05801879 |
| 7745 | cg26194092 | cg17843418 | cg02734419 |
| 7746 | cg26204042 | cg17820025 | cg05503991 |
| 7747 | cg26207909 | cg17797898 | cg05724271 |
| 7748 | cg26214074 | cg17678224 | cg06154633 |
| 7749 | cg26214948 | cg17548735 | cg11592377 |
| 7750 | cg26215113 | cg17511604 | cg05477920 |
| 7751 | cg26218835 | cg17470198 | cg17830810 |
| 7752 | cg26222498 | cg17214107 | cg13601605 |
| 7753 | cg26224624 | cg17203290 | cg14732540 |
| 7754 | cg26224791 | cg17196713 | cg19761272 |
| 7755 | cg26231761 | cg17112404 | cg06513888 |
| 7756 | cg26234644 | cg17107501 | cg24767368 |
| 7757 | cg26240231 | cg17032372 | cg25754933 |
| 7758 | cg26245697 | cg16996571 | cg27203917 |
| 7759 | cg26261270 | cg16908801 | cg18132690 |
| 7760 | cg26261873 | cg16890796 | cg25998584 |
| 7761 | cg26262482 | cg16885096 | cg24747239 |
| 7762 | cg26268125 | cg16784943 | cg16726435 |
| 7763 | cg26268565 | cg16762085 | cg16436210 |
| 7764 | cg26284638 | cg16704938 | cg04846781 |
| 7765 | cg26289871 | cg16565294 | cg14992771 |
| 7766 | cg26297299 | cg16554534 | cg20190649 |
| 7767 | cg26304689 | cg16499415 | cg24268698 |
| 7768 | cg26309261 | cg16479633 | cg27128001 |
| 7769 | cg26313421 | cg16463044 | cg02704331 |
| 7770 | cg26313976 | cg16365663 | cg11672338 |
| 7771 | cg26315221 | cg16329509 | cg11843691 |
| 7772 | cg26315985 | cg16174644 | cg26428825 |
| 7773 | cg26321613 | cg15943602 | cg11588197 |
| 7774 | cg26323752 | cg15889057 | cg11762760 |
| 7775 | cg26325286 | cg15798050 | cg04415736 |
| 7776 | cg26326208 | cg15712304 | cg02225004 |
| 7777 | cg26328589 | cg15561453 | cg23929809 |
| 7778 | cg26332285 | cg15546071 | cg03680680 |
| 7779 | cg26341003 | cg15536947 | cg00442220 |
| 7780 | cg26342552 | cg15536489 | cg18617669 |
| 7781 | cg26343721 | cg15507500 | cg20673255 |
| 7782 | cg26350921 | cg15391531 | cg22584580 |
| 7783 | cg26354947 | cg15342087 | cg22256482 |
| 7784 | cg26362368 | cg15269394 | cg18045658 |
| 7785 | cg26365254 | cg15171237 | cg06212263 |
| 7786 | cg26365784 | cg15155463 | cg12186219 |
| 7787 | cg26365854 | cg14966074 | cg10982964 |
| 7788 | cg26366087 | cg14921326 | cg07912144 |

|      |            |            |            |
|------|------------|------------|------------|
| 7789 | cg26367275 | cg14811014 | cg19443475 |
| 7790 | cg26377276 | cg14698794 | cg12681784 |
| 7791 | cg26379230 | cg14570652 | cg16876192 |
| 7792 | cg26381919 | cg14473030 | cg04137490 |
| 7793 | cg26383057 | cg14462369 | cg22904096 |
| 7794 | cg26383138 | cg14405528 | cg13877452 |
| 7795 | cg26392980 | cg14297546 | cg02159643 |
| 7796 | cg26394825 | cg14262433 | cg27290103 |
| 7797 | cg26398024 | cg14201946 | cg17645528 |
| 7798 | cg26408861 | cg14200357 | cg18834729 |
| 7799 | cg26410484 | cg14175330 | cg11152884 |
| 7800 | cg26411080 | cg14168733 | cg27662093 |
| 7801 | cg26413192 | cg14093018 | cg17221941 |
| 7802 | cg26419962 | cg13972711 | cg13795838 |
| 7803 | cg26420566 | cg13904806 | cg10580341 |
| 7804 | cg26421308 | cg13877452 | cg14506192 |
| 7805 | cg26421310 | cg13799838 | cg03649353 |
| 7806 | cg26423542 | cg13793145 | cg08983215 |
| 7807 | cg26423824 | cg13782615 | cg05349039 |
| 7808 | cg26426334 | cg13753460 | cg20925383 |
| 7809 | cg26426564 | cg13731636 | cg01903305 |
| 7810 | cg26428825 | cg13721589 | cg26503644 |
| 7811 | cg26428962 | cg13707189 | cg14337844 |
| 7812 | cg26434328 | cg13668823 | cg13991631 |
| 7813 | cg26441230 | cg13662225 | cg10862981 |
| 7814 | cg26441486 | cg13601605 | cg03515246 |
| 7815 | cg26446949 | cg13587802 | cg12595461 |
| 7816 | cg26448137 | cg13537940 | cg20958959 |
| 7817 | cg26448609 | cg13464157 | cg13629563 |
| 7818 | cg26449178 | cg13456321 | cg01820765 |
| 7819 | cg26450275 | cg13444374 | cg21535670 |
| 7820 | cg26452091 | cg13439189 | cg02926160 |
| 7821 | cg26460678 | cg13433644 | cg03722184 |
| 7822 | cg26462488 | cg13099139 | cg13526766 |
| 7823 | cg26466921 | cg13093285 | cg04883903 |
| 7824 | cg26467269 | cg13055385 | cg03285823 |
| 7825 | cg26475911 | cg13054523 | cg03760490 |
| 7826 | cg26484017 | cg12995933 | cg01454947 |
| 7827 | cg26495716 | cg12729518 | cg04348080 |
| 7828 | cg26499286 | cg12612065 | cg26074140 |
| 7829 | cg26502610 | cg12569216 | cg03212620 |
| 7830 | cg26503644 | cg12442385 | cg14178294 |
| 7831 | cg26503877 | cg12379145 | cg21011883 |
| 7832 | cg26504421 | cg12070646 | cg12467960 |
| 7833 | cg26510473 | cg12064373 | cg23507051 |
| 7834 | cg26514080 | cg12054698 | cg09057885 |
| 7835 | cg26516446 | cg12053105 | cg17846497 |
| 7836 | cg26526953 | cg12019806 | cg01527159 |
| 7837 | cg26529655 | cg11990296 | cg16172837 |
| 7838 | cg26540302 | cg11952908 | cg24870688 |
| 7839 | cg26543243 | cg11951169 | cg12433926 |
| 7840 | cg26547741 | cg11945095 | cg10716356 |
| 7841 | cg26550337 | cg11847597 | cg09262882 |

|      |            |            |            |
|------|------------|------------|------------|
| 7842 | cg26551200 | cg11840849 | cg15363973 |
| 7843 | cg26552621 | cg11815072 | cg16640008 |
| 7844 | cg26564172 | cg11772801 | cg27594157 |
| 7845 | cg26566236 | cg11753157 | cg07810967 |
| 7846 | cg26572651 | cg11697433 | cg00981003 |
| 7847 | cg26573923 | cg11585280 | cg14570652 |
| 7848 | cg26574247 | cg11527930 | cg13274107 |
| 7849 | cg26579379 | cg11523799 | cg20435464 |
| 7850 | cg26585320 | cg11449408 | cg19536407 |
| 7851 | cg26585452 | cg11225330 | cg03181618 |
| 7852 | cg26597727 | cg11207081 | cg24358599 |
| 7853 | cg26601559 | cg11155016 | cg17539235 |
| 7854 | cg26605683 | cg11036962 | cg12053105 |
| 7855 | cg26607528 | cg11027058 | cg06246000 |
| 7856 | cg26608486 | cg10902107 | cg03431903 |
| 7857 | cg26609642 | cg10872457 | cg19970953 |
| 7858 | cg26613811 | cg10818702 | cg14658346 |
| 7859 | cg26614264 | cg10601476 | cg06641607 |
| 7860 | cg26620147 | cg10552275 | cg21279756 |
| 7861 | cg26637901 | cg10550166 | cg14093663 |
| 7862 | cg26645242 | cg10495754 | cg04155280 |
| 7863 | cg26648465 | cg10467217 | cg02228688 |
| 7864 | cg26650973 | cg10464467 | cg23971517 |
| 7865 | cg26653360 | cg10193870 | cg00948881 |
| 7866 | cg26660115 | cg10174191 | cg17307791 |
| 7867 | cg26661623 | cg10119288 | cg22706883 |
| 7868 | cg26666292 | cg10115918 | cg12590668 |
| 7869 | cg26668713 | cg10107466 | cg25066224 |
| 7870 | cg26668872 | cg10107330 | cg11207081 |
| 7871 | cg26672794 | cg10101600 | cg16117028 |
| 7872 | cg26673975 | cg10012530 | cg01753176 |
| 7873 | cg26677892 | cg09884107 | cg26963844 |
| 7874 | cg26687830 | cg09859805 | cg23996800 |
| 7875 | cg26689934 | cg09789315 | cg00994984 |
| 7876 | cg26690672 | cg09612502 | cg01885814 |
| 7877 | cg26692003 | cg09597070 | cg20863668 |
| 7878 | cg26695387 | cg09556902 | cg12599569 |
| 7879 | cg26697605 | cg09520904 | cg24304880 |
| 7880 | cg26705574 | cg09505809 | cg19567295 |
| 7881 | cg26709309 | cg09450022 | cg24960639 |
| 7882 | cg26710819 | cg09407273 | cg06696911 |
| 7883 | cg26711406 | cg09406921 | cg19181160 |
| 7884 | cg26720682 | cg09253696 | cg08137602 |
| 7885 | cg26721908 | cg09246253 | cg08572315 |
| 7886 | cg26723735 | cg09226986 | cg19435621 |
| 7887 | cg26726230 | cg09218398 | cg21010028 |
| 7888 | cg26734040 | cg09198360 | cg05703996 |
| 7889 | cg26737223 | cg09123961 | cg19182035 |
| 7890 | cg26740525 | cg09080909 | cg14657458 |
| 7891 | cg26744332 | cg09006487 | cg08435157 |
| 7892 | cg26748583 | cg08955461 | cg02247300 |
| 7893 | cg26750188 | cg08924256 | cg10095352 |
| 7894 | cg26757820 | cg08894401 | cg14597504 |

|      |            |            |            |
|------|------------|------------|------------|
| 7895 | cg26765599 | cg08806632 | cg20061812 |
| 7896 | cg26767085 | cg08775774 | cg27044641 |
| 7897 | cg26767198 | cg08733553 | cg17367901 |
| 7898 | cg26769720 | cg08590257 | cg26767085 |
| 7899 | cg26778630 | cg08521178 | cg13299824 |
| 7900 | cg26784106 | cg08264519 | cg03639964 |
| 7901 | cg26784300 | cg08257212 | cg07828612 |
| 7902 | cg26787096 | cg08206156 | cg24096323 |
| 7903 | cg26794830 | cg08115732 | cg11018723 |
| 7904 | cg26796443 | cg08061755 | cg14507427 |
| 7905 | cg26797297 | cg08059361 | cg17528003 |
| 7906 | cg26798772 | cg08004045 | cg00470794 |
| 7907 | cg26800893 | cg08002981 | cg17437086 |
| 7908 | cg26803670 | cg07818978 | cg13744954 |
| 7909 | cg26808779 | cg07795082 | cg27207616 |
| 7910 | cg26810214 | cg07746532 | cg06807837 |
| 7911 | cg26815121 | cg07685601 | cg19691659 |
| 7912 | cg26818159 | cg07674095 | cg00816182 |
| 7913 | cg26819427 | cg07673230 | cg01849845 |
| 7914 | cg26828839 | cg07585257 | cg02084834 |
| 7915 | cg26832915 | cg07572251 | cg19109601 |
| 7916 | cg26835798 | cg07565042 | cg13851989 |
| 7917 | cg26837766 | cg07506407 | cg01788682 |
| 7918 | cg26840755 | cg07487572 | cg09875326 |
| 7919 | cg26853057 | cg07449447 | cg07061582 |
| 7920 | cg26856771 | cg07425568 | cg16996266 |
| 7921 | cg26860182 | cg07368061 | cg03644585 |
| 7922 | cg26862316 | cg07296854 | cg05535123 |
| 7923 | cg26867987 | cg07295362 | cg07171780 |
| 7924 | cg26871875 | cg07284519 | cg15874642 |
| 7925 | cg26873164 | cg07207742 | cg00718694 |
| 7926 | cg26877336 | cg07181257 | cg27318635 |
| 7927 | cg26880445 | cg07071809 | cg25112643 |
| 7928 | cg26882115 | cg07061582 | cg25479682 |
| 7929 | cg26884345 | cg07016298 | cg11575912 |
| 7930 | cg26886188 | cg07008193 | cg15277378 |
| 7931 | cg26889437 | cg06989253 | cg04661959 |
| 7932 | cg26889953 | cg06925389 | cg12486287 |
| 7933 | cg26890480 | cg06918474 | cg09659803 |
| 7934 | cg26891661 | cg06813419 | cg16476700 |
| 7935 | cg26893743 | cg06795827 | cg03017946 |
| 7936 | cg26894079 | cg06793277 | cg14274896 |
| 7937 | cg26899399 | cg06791695 | cg26853057 |
| 7938 | cg26905281 | cg06768437 | cg08986340 |
| 7939 | cg26909797 | cg06723357 | cg09267483 |
| 7940 | cg26915618 | cg06694381 | cg03639152 |
| 7941 | cg26919387 | cg06665485 | cg24015175 |
| 7942 | cg26923754 | cg06662568 | cg05816786 |
| 7943 | cg26929394 | cg06610254 | cg04131010 |
| 7944 | cg26931296 | cg06553975 | cg12856760 |
| 7945 | cg26932586 | cg06537652 | cg05816006 |
| 7946 | cg26932693 | cg06521357 | cg01448551 |
| 7947 | cg26934759 | cg06497934 | cg02165692 |

|      |            |            |            |
|------|------------|------------|------------|
| 7948 | cg26934881 | cg06387204 | cg26014373 |
| 7949 | cg26937267 | cg06369532 | cg12846837 |
| 7950 | cg26939375 | cg06332666 | cg04837783 |
| 7951 | cg26942121 | cg06294856 | cg04608722 |
| 7952 | cg26947127 | cg06255601 | cg05528280 |
| 7953 | cg26951000 | cg06200670 | cg08739576 |
| 7954 | cg26954228 | cg06179971 | cg27306243 |
| 7955 | cg26955275 | cg05986052 | cg11794120 |
| 7956 | cg26960083 | cg05917419 | cg06873590 |
| 7957 | cg26963844 | cg05916989 | cg06689039 |
| 7958 | cg26964426 | cg05856230 | cg07813622 |
| 7959 | cg26965897 | cg05824594 | cg08173959 |
| 7960 | cg26969840 | cg05712931 | cg00047338 |
| 7961 | cg26970113 | cg05591270 | cg16996571 |
| 7962 | cg26974276 | cg05579549 | cg10458392 |
| 7963 | cg26974415 | cg05450563 | cg24997330 |
| 7964 | cg26974441 | cg05340240 | cg15076811 |
| 7965 | cg26977086 | cg05307141 | cg06614534 |
| 7966 | cg26977644 | cg05253759 | cg21620968 |
| 7967 | cg26978064 | cg05249271 | cg21273407 |
| 7968 | cg26987720 | cg05202424 | cg08273640 |
| 7969 | cg26995244 | cg05202347 | cg14782266 |
| 7970 | cg27000120 | cg05133706 | cg13263472 |
| 7971 | cg27003787 | cg05058103 | cg26177754 |
| 7972 | cg27004760 | cg05037556 | cg07927953 |
| 7973 | cg27007717 | cg04998447 | cg01645401 |
| 7974 | cg27008230 | cg04924028 | cg08605347 |
| 7975 | cg27009448 | cg04873169 | cg15603885 |
| 7976 | cg27010076 | cg04761077 | cg13358061 |
| 7977 | cg27011829 | cg04724387 | cg22867608 |
| 7978 | cg27014538 | cg04689023 | cg17201542 |
| 7979 | cg27020028 | cg04508340 | cg17115147 |
| 7980 | cg27021553 | cg04473654 | cg13658093 |
| 7981 | cg27025137 | cg04296187 | cg09553581 |
| 7982 | cg27026202 | cg04220455 | cg00118317 |
| 7983 | cg27039312 | cg04214430 | cg07804434 |
| 7984 | cg27040468 | cg04165857 | cg04854911 |
| 7985 | cg27042523 | cg04155280 | cg07416344 |
| 7986 | cg27044591 | cg04034290 | cg02040734 |
| 7987 | cg27044641 | cg03851401 | cg19577054 |
| 7988 | cg27049344 | cg03762393 | cg07992340 |
| 7989 | cg27053040 | cg03659476 | cg27280313 |
| 7990 | cg27053299 | cg03629926 | cg14323199 |
| 7991 | cg27059537 | cg03621841 | cg01957900 |
| 7992 | cg27065717 | cg03618741 | cg26394825 |
| 7993 | cg27068650 | cg03575974 | cg01147665 |
| 7994 | cg27070508 | cg03501387 | cg27641072 |
| 7995 | cg27073066 | cg03487040 | cg05836492 |
| 7996 | cg27073311 | cg03445151 | cg25909885 |
| 7997 | cg27073349 | cg03434029 | cg19577082 |
| 7998 | cg27074355 | cg03424213 | cg01567615 |
| 7999 | cg27078464 | cg03401464 | cg16475712 |
| 8000 | cg27082076 | cg03381007 | cg13464157 |

|      |            |            |            |
|------|------------|------------|------------|
| 8001 | cg27082292 | cg03301025 | cg22814801 |
| 8002 | cg27089352 | cg03294704 | cg23288298 |
| 8003 | cg27092594 | cg03289072 | cg15819921 |
| 8004 | cg27095984 | cg03162779 | cg08106635 |
| 8005 | cg27096087 | cg03158194 | cg07279281 |
| 8006 | cg27096981 | cg03143333 | cg08433725 |
| 8007 | cg27100149 | cg02968890 | cg07617152 |
| 8008 | cg27100436 | cg02920396 | cg12955277 |
| 8009 | cg27100471 | cg02901644 | cg21476203 |
| 8010 | cg27101023 | cg02817925 | cg12149319 |
| 8011 | cg27105598 | cg02812189 | cg27277104 |
| 8012 | cg27110054 | cg02764093 | cg06024540 |
| 8013 | cg27110374 | cg02753511 | cg05595469 |
| 8014 | cg27117439 | cg02742533 | cg25513535 |
| 8015 | cg27118035 | cg02650728 | cg24287189 |
| 8016 | cg27120246 | cg02643834 | cg10829693 |
| 8017 | cg27128001 | cg02633363 | cg27082292 |
| 8018 | cg27133959 | cg02613380 | cg11405458 |
| 8019 | cg27143695 | cg02605292 | cg16846503 |
| 8020 | cg27143703 | cg02604890 | cg06213876 |
| 8021 | cg27144884 | cg02596645 | cg19857633 |
| 8022 | cg27146036 | cg02570361 | cg11372818 |
| 8023 | cg27146477 | cg02534048 | cg20437892 |
| 8024 | cg27156542 | cg02369775 | cg15016233 |
| 8025 | cg27160524 | cg02364518 | cg26180006 |
| 8026 | cg27161027 | cg02344497 | cg02447268 |
| 8027 | cg27163630 | cg02243479 | cg26650973 |
| 8028 | cg27168410 | cg02156952 | cg19284767 |
| 8029 | cg27170206 | cg02122052 | cg07727134 |
| 8030 | cg27171605 | cg02013018 | cg07420867 |
| 8031 | cg27177415 | cg01949455 | cg03515290 |
| 8032 | cg27177779 | cg01923724 | cg10214757 |
| 8033 | cg27177983 | cg01869896 | cg00027990 |
| 8034 | cg27178714 | cg01835489 | cg13842262 |
| 8035 | cg27180994 | cg01722498 | cg04724387 |
| 8036 | cg27181295 | cg01715499 | cg08067991 |
| 8037 | cg27186013 | cg01677310 | cg23052758 |
| 8038 | cg27192012 | cg01604946 | cg12163952 |
| 8039 | cg27196496 | cg01596854 | cg24163616 |
| 8040 | cg27200466 | cg01567615 | cg14507658 |
| 8041 | cg27201457 | cg01527159 | cg03077533 |
| 8042 | cg27202913 | cg01503773 | cg07849237 |
| 8043 | cg27203917 | cg01497892 | cg14200357 |
| 8044 | cg27207616 | cg01454947 | cg10532807 |
| 8045 | cg27212729 | cg01406317 | cg22542420 |
| 8046 | cg27213925 | cg01403803 | cg16238993 |
| 8047 | cg27216597 | cg01352276 | cg26075905 |
| 8048 | cg27221053 | cg01350190 | cg00950412 |
| 8049 | cg27226424 | cg01191157 | cg20593887 |
| 8050 | cg27226927 | cg01176028 | cg14777056 |
| 8051 | cg27227317 | cg01122461 | cg02273647 |
| 8052 | cg27228210 | cg01017395 | cg01719663 |
| 8053 | cg27230140 | cg00963675 | cg25306579 |



|      |            |            |            |
|------|------------|------------|------------|
| 8054 | cg27233847 | cg00945443 | cg00412142 |
| 8055 | cg27234648 | cg00935361 | cg15352671 |
| 8056 | cg27239280 | cg00890378 | cg05340240 |
| 8057 | cg27241873 | cg00873009 | cg25372722 |
| 8058 | cg27250037 | cg00866186 | cg04568492 |
| 8059 | cg27263448 | cg00789416 | cg26383057 |
| 8060 | cg27269190 | cg00701856 | cg17907628 |
| 8061 | cg27273675 | cg00660140 | cg13964068 |
| 8062 | cg27275022 | cg00563061 | cg02011409 |
| 8063 | cg27277104 | cg00559439 | cg14282937 |
| 8064 | cg27280313 | cg00547768 | cg22752049 |
| 8065 | cg27287438 | cg00528490 | cg00051546 |
| 8066 | cg27287951 | cg00470817 | cg02827340 |
| 8067 | cg27288127 | cg00415011 | cg13683219 |
| 8068 | cg27290103 | cg00401972 | cg00631702 |
| 8069 | cg27294008 | cg00400654 | cg09890597 |
| 8070 | cg27295434 | cg00386725 | cg09172973 |
| 8071 | cg27301230 | cg00373967 | cg08978399 |
| 8072 | cg27302301 | cg00359365 | cg03300805 |
| 8073 | cg27306243 | cg00311883 | cg08631328 |
| 8074 | cg27306787 | cg00270141 | cg27120246 |
| 8075 | cg27318635 | cg00229868 | cg03291336 |
| 8076 | cg27320213 | cg00216061 | cg00038342 |
| 8077 | cg27331828 | cg00123090 | cg03421440 |
| 8078 | cg27333269 | cg00027990 | cg05588341 |
| 8079 | cg27339974 | cg00027650 | cg16697024 |
| 8080 | cg27343801 | cg27632471 | cg13636986 |
| 8081 | cg27344022 | cg27400447 | cg20463808 |
| 8082 | cg27346937 | cg27364916 | cg08494755 |
| 8083 | cg27349909 | cg27351239 | cg09115960 |
| 8084 | cg27351239 | cg27318635 | cg14550212 |
| 8085 | cg27351813 | cg27317493 | cg12843033 |
| 8086 | cg27360231 | cg27275022 | cg25586305 |
| 8087 | cg27364916 | cg27230140 | cg02631921 |
| 8088 | cg27365627 | cg27171605 | cg15230743 |
| 8089 | cg27375286 | cg27168410 | cg12092201 |
| 8090 | cg27378358 | cg27134342 | cg14783283 |
| 8091 | cg27378814 | cg27053299 | cg19968041 |
| 8092 | cg27380631 | cg27003787 | cg15617847 |
| 8093 | cg27381488 | cg26934881 | cg15329179 |
| 8094 | cg27382164 | cg26832915 | cg20397614 |
| 8095 | cg27390206 | cg26784300 | cg16292933 |
| 8096 | cg27396760 | cg26754071 | cg07296260 |
| 8097 | cg27399387 | cg26687830 | cg16285424 |
| 8098 | cg27399753 | cg26550337 | cg10517096 |
| 8099 | cg27400447 | cg26546882 | cg07588779 |
| 8100 | cg27401116 | cg26514080 | cg04091961 |
| 8101 | cg27410136 | cg26475911 | cg15777335 |
| 8102 | cg27410449 | cg26428825 | cg14738348 |
| 8103 | cg27421679 | cg26304689 | cg13863769 |
| 8104 | cg27424692 | cg26194092 | cg05506498 |
| 8105 | cg27434984 | cg26159074 | cg20806143 |
| 8106 | cg27437304 | cg26075905 | cg26166004 |

|      |            |            |            |
|------|------------|------------|------------|
| 8107 | cg27438218 | cg26041493 | cg19482885 |
| 8108 | cg27441486 | cg26037660 | cg15171237 |
| 8109 | cg27449255 | cg25975823 | cg14744022 |
| 8110 | cg27454102 | cg25909885 | cg23089261 |
| 8111 | cg27458631 | cg25864762 | cg11761615 |
| 8112 | cg27466615 | cg25793812 | cg07431229 |
| 8113 | cg27469606 | cg25739943 | cg09327610 |
| 8114 | cg27475586 | cg25723217 | cg19092603 |
| 8115 | cg27478167 | cg25719378 | cg24404329 |
| 8116 | cg27485845 | cg25699199 | cg02935097 |
| 8117 | cg27489873 | cg25594550 | cg26397391 |
| 8118 | cg27491887 | cg25445431 | cg12481567 |
| 8119 | cg27492839 | cg25443991 | cg19763281 |
| 8120 | cg27493345 | cg25399818 | cg15382580 |
| 8121 | cg27494100 | cg25369553 | cg05024916 |
| 8122 | cg27495643 | cg25339612 | cg06750802 |
| 8123 | cg27498434 | cg25317315 | cg23100081 |
| 8124 | cg27503499 | cg25245161 | cg08644106 |
| 8125 | cg27505472 | cg25190718 | cg01403803 |
| 8126 | cg27506609 | cg24916358 | cg11469540 |
| 8127 | cg27511289 | cg24696473 | cg22396663 |
| 8128 | cg27521744 | cg24678812 | cg01716016 |
| 8129 | cg27522078 | cg24629431 | cg13691622 |
| 8130 | cg27526774 | cg24619276 | cg04744514 |
| 8131 | cg27532130 | cg24550880 | cg09647797 |
| 8132 | cg27533454 | cg24549289 | cg10959933 |
| 8133 | cg27543578 | cg24420089 | cg15806038 |
| 8134 | cg27548256 | cg24394336 | cg08428985 |
| 8135 | cg27549186 | cg24289452 | cg27287951 |
| 8136 | cg27554156 | cg24268698 | cg02115911 |
| 8137 | cg27560818 | cg24152000 | cg04282530 |
| 8138 | cg27565803 | cg24034465 | cg01065180 |
| 8139 | cg27566403 | cg23990272 | cg18116267 |
| 8140 | cg27567761 | cg23906687 | cg25390243 |
| 8141 | cg27571329 | cg23886515 | cg18273464 |
| 8142 | cg27571590 | cg23748172 | cg21379004 |
| 8143 | cg27573308 | cg23566503 | cg24996315 |
| 8144 | cg27579131 | cg23536830 | cg04545872 |
| 8145 | cg27585557 | cg23519637 | cg00106093 |
| 8146 | cg27594157 | cg23477348 | cg06113801 |
| 8147 | cg27599376 | cg23460369 | cg21475076 |
| 8148 | cg27604101 | cg23454517 | cg15475080 |
| 8149 | cg27611699 | cg23429698 | cg02579022 |
| 8150 | cg27612166 | cg23399577 | cg00825317 |
| 8151 | cg27613016 | cg23351271 | cg22735889 |
| 8152 | cg27616751 | cg23333146 | cg15208689 |
| 8153 | cg27618145 | cg23311929 | cg07763497 |
| 8154 | cg27618305 | cg23249399 | cg20997320 |
| 8155 | cg27627006 | cg23119433 | cg22800332 |
| 8156 | cg27630540 | cg23092218 | cg13461509 |
| 8157 | cg27631766 | cg23058194 | cg18174089 |
| 8158 | cg27634115 | cg23036171 | cg03359508 |
| 8159 | cg27635271 | cg22986999 | cg24045498 |

|      |            |            |            |
|------|------------|------------|------------|
| 8160 | cg27637521 | cg22986770 | cg21687003 |
| 8161 | cg27641072 | cg22958118 | cg05014846 |
| 8162 | cg27641240 | cg22942245 | cg21270847 |
| 8163 | cg27650212 | cg22866998 | cg19878200 |
| 8164 | cg27655512 | cg22866068 | cg12112434 |
| 8165 | cg27655716 | cg22666103 | cg03030665 |
| 8166 | cg27662093 | cg22639325 | cg17976731 |
| 8167 | cg06933824 | cg22579075 | cg10409799 |
| 8168 | cg25230305 | cg22563907 | cg11155016 |
| 8169 | cg26872742 | cg22436253 | cg00711584 |
| 8170 | cg15899297 | cg22245494 | cg16617774 |
| 8171 | cg04353106 | cg22194948 | cg13653963 |
| 8172 | cg08954277 | cg21978195 | cg15798050 |
| 8173 | cg01191157 | cg21929969 | cg09896120 |
| 8174 | cg01283300 | cg21927420 | cg01150866 |
| 8175 | cg01794929 | cg21915998 | cg26267483 |
| 8176 | cg01683570 | cg21811911 | cg21268659 |
| 8177 | cg22885000 | cg21697252 | cg25246084 |
| 8178 | cg20778199 | cg21628927 | cg22605643 |
| 8179 | cg15269148 | cg21560157 | cg17243540 |
| 8180 | cg00229868 | cg21558509 | cg14244360 |
| 8181 | cg02221422 | cg21474062 | cg26974276 |
| 8182 | cg27423208 | cg21460582 | cg00289254 |
| 8183 | cg05541267 | cg21438602 | cg00899856 |
| 8184 | cg08384155 | cg21385052 | cg03495832 |
| 8185 | cg20300032 | cg21373806 | cg25619703 |
| 8186 | cg10404601 | cg21269763 | cg00713253 |
| 8187 | cg01972651 | cg21092828 | cg21881364 |
| 8188 | cg06752365 | cg21004924 | cg18035571 |
| 8189 | cg14852276 | cg20793665 | cg25363336 |
| 8190 | cg20555305 | cg20758651 | cg15639842 |
| 8191 | cg15798050 | cg20679659 | cg21855211 |
| 8192 | cg16277214 | cg20677814 | cg09641077 |
| 8193 | cg13428516 | cg20668447 | cg04663956 |
| 8194 | cg19044462 | cg20602417 | cg11081826 |
| 8195 | cg10095226 | cg20197756 | cg12397802 |
| 8196 | cg22638977 | cg20152304 | cg22069262 |
| 8197 | cg07377299 | cg20065217 | cg08198711 |
| 8198 | cg25900150 | cg19968041 | cg09832108 |
| 8199 | cg14865516 | cg19951269 | cg11861709 |
| 8200 | cg04685228 | cg19950556 | cg00890378 |
| 8201 | cg06371291 | cg19781117 | cg25038926 |
| 8202 | cg09851241 | cg19769521 | cg07050599 |
| 8203 | cg16766632 | cg19585100 | cg26803670 |
| 8204 | cg09685601 | cg19560210 | cg25699199 |
| 8205 | cg22348713 | cg19512961 | cg21874862 |
| 8206 | cg07328519 | cg19486437 | cg07811634 |
| 8207 | cg00977384 | cg19422138 | cg22356839 |
| 8208 | cg19569551 | cg19402179 | cg08263571 |
| 8209 | cg27470978 | cg19353949 | cg09703323 |
| 8210 | cg09970023 | cg19296501 | cg03764767 |
| 8211 | cg08970011 | cg19274401 | cg06967828 |
| 8212 | cg01819707 | cg19137748 | cg01216078 |

|      |            |            |            |
|------|------------|------------|------------|
| 8213 | cg19755886 | cg19116924 | cg02800817 |
| 8214 | cg22854448 | cg19101998 | cg02742455 |
| 8215 | cg25941751 | cg19089328 | cg11199862 |
| 8216 | cg06310294 | cg19063768 | cg18965086 |
| 8217 | cg25011577 | cg19007948 | cg05418508 |
| 8218 | cg17778120 | cg18994446 | cg14325029 |
| 8219 | cg19025193 | cg18912160 | cg17153432 |
| 8220 | cg04688645 | cg18794809 | cg10247864 |
| 8221 | cg15104211 | cg18693479 | cg24915915 |
| 8222 | cg04714939 | cg18514164 | cg08749599 |
| 8223 | cg08377924 | cg18397743 | cg23834688 |
| 8224 | cg21696975 | cg18330203 | cg22329743 |
| 8225 | cg25586305 | cg18327762 | cg25604994 |
| 8226 | cg16726435 | cg18311516 | cg20011326 |
| 8227 | cg21670987 | cg18244708 | cg02240030 |
| 8228 | cg18696900 | cg18193482 | cg15063355 |
| 8229 | cg04835685 | cg18148488 | cg12104982 |
| 8230 | cg22136038 | cg18116267 | cg07800359 |
| 8231 | cg27231912 | cg18109289 | cg06768437 |
| 8232 | cg12375903 | cg18000764 | cg02083559 |
| 8233 | cg12179658 | cg17939585 | cg08458912 |
| 8234 | cg00442802 | cg17929859 | cg16222790 |
| 8235 | cg20731213 | cg17851345 | cg19998675 |
| 8236 | cg26953293 | cg17685579 | cg01991625 |
| 8237 | cg01827633 | cg17654747 | cg17945541 |
| 8238 | cg08124986 | cg17589890 | cg07396047 |
| 8239 | cg03485217 | cg17505642 | cg17842918 |
| 8240 | cg21549497 | cg17468543 | cg14829271 |
| 8241 | cg08176056 | cg17437086 | cg21787369 |
| 8242 | cg17907628 | cg17394978 | cg13434216 |
| 8243 | cg09556902 | cg17333042 | cg23357150 |
| 8244 | cg14288326 | cg17321561 | cg13343549 |
| 8245 | cg12872329 | cg17208278 | cg07862575 |
| 8246 | cg20673255 | cg17172949 | cg22834511 |
| 8247 | cg01617074 | cg17103856 | cg07046047 |
| 8248 | cg04601090 | cg17095936 | cg01062651 |
| 8249 | cg20685600 | cg16929793 | cg04390667 |
| 8250 | cg23005227 | cg16786144 | cg09495643 |
| 8251 | cg06259557 | cg16697024 | cg01380319 |
| 8252 | cg11237495 | cg16564135 | cg25097308 |
| 8253 | cg17429870 | cg16537245 | cg04820362 |
| 8254 | cg10885338 | cg16509072 | cg27613016 |
| 8255 | cg06269419 | cg16419526 | cg06599914 |
| 8256 | cg08994061 | cg16398832 | cg09849774 |
| 8257 | cg23318523 | cg16387532 | cg09370299 |
| 8258 | cg16684117 | cg16385941 | cg22546818 |
| 8259 | cg25339612 | cg16232530 | cg18704595 |
| 8260 | cg01923724 | cg16184131 | cg04967009 |
| 8261 | cg18929814 | cg16024937 | cg21794816 |
| 8262 | cg26763380 | cg15988204 | cg10762613 |
| 8263 | cg17107501 | cg15910594 | cg07874353 |
| 8264 | cg17961835 | cg15819921 | cg10590657 |
| 8265 | cg10876003 | cg15616400 | cg01810347 |

|      |            |            |            |
|------|------------|------------|------------|
| 8266 | cg00592695 | cg15600176 | cg21373806 |
| 8267 | cg12855271 | cg15520941 | cg11668876 |
| 8268 | cg19901381 | cg15488570 | cg19296501 |
| 8269 | cg02102456 | cg15464763 | cg03899978 |
| 8270 | cg00637745 | cg15459715 | cg09028132 |
| 8271 | cg10299941 | cg15335728 | cg14819399 |
| 8272 | cg24696473 | cg15322667 | cg25006254 |
| 8273 | cg04431002 | cg15226226 | cg26974415 |
| 8274 | cg04762676 | cg15208689 | cg04269098 |
| 8275 | cg13003178 | cg15175632 | cg27511289 |
| 8276 | cg14769121 | cg15168816 | cg15582126 |
| 8277 | cg10803714 | cg15126957 | cg19353949 |
| 8278 | cg17766055 | cg15089272 | cg24847636 |
| 8279 | cg08954601 | cg15086474 | cg21597937 |
| 8280 | cg07205670 | cg15026277 | cg13774184 |
| 8281 | cg22325145 | cg14899960 | cg21437521 |
| 8282 | cg05638821 | cg14777056 | cg16312872 |
| 8283 | cg10023624 | cg14738348 | cg14684166 |
| 8284 | cg08677210 | cg14723032 | cg22397446 |
| 8285 | cg03379270 | cg14684068 | cg03811905 |
| 8286 | cg13537008 | cg14626525 | cg12842409 |
| 8287 | cg25082361 | cg14615152 | cg04437605 |
| 8288 | cg01194444 | cg14565781 | cg25519921 |
| 8289 | cg15230743 | cg14519294 | cg07574267 |
| 8290 | cg08435157 | cg14516350 | cg08409074 |
| 8291 | cg11714334 | cg14507427 | cg27000120 |
| 8292 | cg19770671 | cg14470121 | cg22342925 |
| 8293 | cg15776300 | cg14467840 | cg26931296 |
| 8294 | cg00374717 | cg14425914 | cg01342572 |
| 8295 | cg06376598 | cg14317513 | cg11819469 |
| 8296 | cg04574046 | cg14285365 | cg24387101 |
| 8297 | cg01835854 | cg14239346 | cg11412527 |
| 8298 | cg22706883 | cg14140717 | cg09165170 |
| 8299 | cg12807855 | cg14118424 | cg22990430 |
| 8300 | cg02972475 | cg14025149 | cg06509598 |
| 8301 | cg24960639 | cg13977320 | cg26444806 |
| 8302 | cg10511902 | cg13922681 | cg25635000 |
| 8303 | cg00620733 | cg13888853 | cg15485665 |
| 8304 | cg21735516 | cg13745832 | cg16502866 |
| 8305 | cg19296662 | cg13724812 | cg17095936 |
| 8306 | cg20386404 | cg13700939 | cg16819272 |
| 8307 | cg07042489 | cg13643040 | cg01063615 |
| 8308 | cg13700939 | cg13620881 | cg05494073 |
| 8309 | cg13795838 | cg13610622 | cg07012739 |
| 8310 | cg15417249 | cg13530474 | cg07064592 |
| 8311 | cg20329153 | cg13521018 | cg19455322 |
| 8312 | cg08264481 | cg13521002 | cg26543243 |
| 8313 | cg19048950 | cg13520715 | cg13947385 |
| 8314 | cg14507427 | cg13470557 | cg12119133 |
| 8315 | cg09825309 | cg13434216 | cg26954228 |
| 8316 | cg05816786 | cg13390372 | cg04920917 |
| 8317 | cg00410600 | cg13381243 | cg00270654 |
| 8318 | cg13555689 | cg13369099 | cg23254569 |

|      |            |            |            |
|------|------------|------------|------------|
| 8319 | cg02604211 | cg13343549 | cg01691522 |
| 8320 | cg20489239 | cg13320257 | cg20916646 |
| 8321 | cg07907315 | cg13225881 | cg10507281 |
| 8322 | cg02263260 | cg13206932 | cg17319576 |
| 8323 | cg00680875 | cg13162581 | cg05346688 |
| 8324 | cg04349839 | cg13133492 | cg12093620 |
| 8325 | cg08458637 | cg13129380 | cg25477334 |
| 8326 | cg05150641 | cg13109865 | cg19824396 |
| 8327 | cg22009923 | cg12987059 | cg27096087 |
| 8328 | cg17473727 | cg12855331 | cg15249446 |
| 8329 | cg02155048 | cg12855271 | cg06259557 |
| 8330 | cg10836809 | cg12790592 | cg15899297 |
| 8331 | cg02600978 | cg12741436 | cg10380108 |
| 8332 | cg02883198 | cg12680106 | cg19190016 |
| 8333 | cg08365388 | cg12604490 | cg12551582 |
| 8334 | cg05601844 | cg12591689 | cg20686479 |
| 8335 | cg15382580 | cg12514933 | cg03421964 |
| 8336 | cg05700348 | cg12163781 | cg02065141 |
| 8337 | cg27177296 | cg12160664 | cg04226256 |
| 8338 | cg19750606 | cg12093220 | cg07091062 |
| 8339 | cg08843064 | cg12061219 | cg17278466 |
| 8340 | cg04131010 | cg11997603 | cg22846966 |
| 8341 | cg25390635 | cg11982525 | cg11115867 |
| 8342 | cg07410188 | cg11940177 | cg11227822 |
| 8343 | cg20721135 | cg11929154 | cg16459391 |
| 8344 | cg23408990 | cg11888359 | cg00948274 |
| 8345 | cg07979388 | cg11792186 | cg23959115 |
| 8346 | cg15639842 | cg11701615 | cg19879265 |
| 8347 | cg22076676 | cg11544882 | cg24420164 |
| 8348 | cg25807487 | cg11523191 | cg27493345 |
| 8349 | cg10298992 | cg11519725 | cg17344813 |
| 8350 | cg09231120 | cg11415402 | cg02087101 |
| 8351 | cg01484266 | cg11343506 | cg03004417 |
| 8352 | cg24425531 | cg11327857 | cg19319067 |
| 8353 | cg15191744 | cg11227822 | cg25296804 |
| 8354 | cg21183664 | cg11210357 | cg03596635 |
| 8355 | cg13514778 | cg11190890 | cg15028232 |
| 8356 | cg21606405 | cg11189177 | cg06537744 |
| 8357 | cg00062282 | cg10980293 | cg09685505 |
| 8358 | cg21238061 | cg10969245 | cg14711433 |
| 8359 | cg05168368 | cg10965164 | cg26366087 |
| 8360 | cg18149689 | cg10811485 | cg01484266 |
| 8361 | cg12925881 | cg10714509 | cg20779414 |
| 8362 | cg06131879 | cg10689512 | cg00648573 |
| 8363 | cg00262446 | cg10664162 | cg10529994 |
| 8364 | cg23173517 | cg10642330 | cg22987457 |
| 8365 | cg08097657 | cg10623198 | cg16412000 |
| 8366 | cg08644340 | cg10519271 | cg10244706 |
| 8367 | cg24136288 | cg10421435 | cg01848660 |
| 8368 | cg05899471 | cg10364862 | cg14497697 |
| 8369 | cg00877758 | cg10301695 | cg20758651 |
| 8370 | cg21189146 | cg10263684 | cg03888083 |
| 8371 | cg02115911 | cg10190898 | cg00656991 |

|      |            |            |            |
|------|------------|------------|------------|
| 8372 | cg03391019 | cg10065736 | cg27572074 |
| 8373 | cg21408581 | cg10016358 | cg23921860 |
| 8374 | cg19034028 | cg10009737 | cg00426425 |
| 8375 | cg04761077 | cg09972881 | cg01337429 |
| 8376 | cg07262506 | cg09951320 | cg26977644 |
| 8377 | cg21450547 | cg09915883 | cg01715499 |
| 8378 | cg07498879 | cg09890746 | cg06037365 |
| 8379 | cg26546882 | cg09825309 | cg16269776 |
| 8380 | cg16717225 | cg09780231 | cg11103999 |
| 8381 | cg13750566 | cg09719124 | cg13392861 |
| 8382 | cg05988219 | cg09603024 | cg06104859 |
| 8383 | cg13654085 | cg09537448 | cg22024295 |
| 8384 | cg09775533 | cg09536516 | cg02628107 |
| 8385 | cg02720600 | cg09280800 | cg14037250 |
| 8386 | cg10529994 | cg09258509 | cg13476204 |
| 8387 | cg22846809 | cg09180239 | cg12529228 |
| 8388 | cg03991120 | cg08994061 | cg24425531 |
| 8389 | cg01216078 | cg08915024 | cg22245494 |
| 8390 | cg04399631 | cg08829140 | cg17013513 |
| 8391 | cg20300651 | cg08823837 | cg20300032 |
| 8392 | cg01641136 | cg08814268 | cg09171093 |
| 8393 | cg26618058 | cg08779982 | cg21092828 |
| 8394 | cg17821664 | cg08677140 | cg01375259 |
| 8395 | cg20547131 | cg08606951 | cg09901532 |
| 8396 | cg07795082 | cg08552290 | cg08003887 |
| 8397 | cg17636309 | cg08293536 | cg03958928 |
| 8398 | cg03041650 | cg08264481 | cg20167126 |
| 8399 | cg09951320 | cg08208595 | cg06746744 |
| 8400 | cg21494132 | cg08173709 | cg08411881 |
| 8401 | cg02289020 | cg08154963 | cg26309261 |
| 8402 | cg08360599 | cg08088222 | cg10024508 |
| 8403 | cg00367649 | cg08039592 | cg18941831 |
| 8404 | cg07561338 | cg07964527 | cg06758191 |
| 8405 | cg03004417 | cg07927540 | cg02480405 |
| 8406 | cg06218688 | cg07874353 | cg05798436 |
| 8407 | cg00660140 | cg07858195 | cg06463230 |
| 8408 | cg27514730 | cg07811634 | cg01577298 |
| 8409 | cg07409629 | cg07754347 | cg15267890 |
| 8410 | cg25141943 | cg07577934 | cg22992258 |
| 8411 | cg27271532 | cg07511723 | cg26695387 |
| 8412 | cg16383573 | cg07385220 | cg11620716 |
| 8413 | cg20829550 | cg07310500 | cg05780637 |
| 8414 | cg03053456 | cg07294624 | cg07584734 |
| 8415 | cg08943374 | cg07214314 | cg03242880 |
| 8416 | cg01272202 | cg07184807 | cg13080151 |
| 8417 | cg07661965 | cg07124859 | cg10307940 |
| 8418 | cg03722184 | cg07123022 | cg03119088 |
| 8419 | cg03984919 | cg07088950 | cg12500891 |
| 8420 | cg13984005 | cg07066794 | cg03939897 |
| 8421 | cg02041470 | cg07050611 | cg10589235 |
| 8422 | cg14122652 | cg06996029 | cg22831256 |
| 8423 | cg18917736 | cg06987369 | cg13377839 |
| 8424 | cg23820770 | cg06869755 | cg07478111 |

|      |            |            |            |
|------|------------|------------|------------|
| 8425 | cg00147160 | cg06853492 | cg05305993 |
| 8426 | cg15878619 | cg06577703 | cg14691924 |
| 8427 | cg26225655 | cg06553058 | cg11908294 |
| 8428 | cg08317243 | cg06443231 | cg24857399 |
| 8429 | cg01599714 | cg06389574 | cg24631518 |
| 8430 | cg27134342 | cg06131879 | cg19784013 |
| 8431 | cg12011299 | cg06068392 | cg04323313 |
| 8432 | cg14811014 | cg05934824 | cg16897800 |
| 8433 | cg13930682 | cg05738470 | cg01482620 |
| 8434 | cg25699199 | cg05637092 | cg23261102 |
| 8435 | cg16898124 | cg05575733 | cg13105904 |
| 8436 | cg07521789 | cg05561386 | cg26392980 |
| 8437 | cg19747744 | cg05506498 | cg03178838 |
| 8438 | cg25993608 | cg05415131 | cg22657772 |
| 8439 | cg00048381 | cg05397809 | cg21889263 |
| 8440 | cg22304399 | cg05390712 | cg06255609 |
| 8441 | cg18817459 | cg05370136 | cg05854826 |
| 8442 | cg27158462 | cg05360477 | cg00083399 |
| 8443 | cg16694397 | cg05340658 | cg27163630 |
| 8444 | cg03223959 | cg05294455 | cg01456989 |
| 8445 | cg27317493 | cg05180954 | cg14785464 |
| 8446 | cg12690127 | cg04911307 | cg14679558 |
| 8447 | cg00943124 | cg04784212 | cg04911307 |
| 8448 | cg04661959 | cg04771901 | cg10790470 |
| 8449 | cg24600706 | cg04699214 | cg20297053 |
| 8450 | cg18240528 | cg04456245 | cg18811860 |
| 8451 | cg01437411 | cg04411052 | cg02776768 |
| 8452 | cg04273604 | cg04399647 | cg01040499 |
| 8453 | cg07507493 | cg04147497 | cg24031446 |
| 8454 | cg14297023 | cg04124361 | cg02374486 |
| 8455 | cg13283765 | cg03889044 | cg18317492 |
| 8456 | cg18919478 | cg03824114 | cg01851970 |
| 8457 | cg16831894 | cg03540589 | cg14473062 |
| 8458 | cg14691924 | cg03419014 | cg26289871 |
| 8459 | cg15208689 | cg03326128 | cg00961932 |
| 8460 | cg11620716 | cg03300805 | cg00627347 |
| 8461 | cg04586928 | cg03252568 | cg00959308 |
| 8462 | cg25625457 | cg03058664 | cg15956469 |
| 8463 | cg02168436 | cg03010561 | cg22720481 |
| 8464 | cg20072162 | cg02973735 | cg03270929 |
| 8465 | cg20349199 | cg02907662 | cg24748448 |
| 8466 | cg24244854 | cg02876276 | cg23072051 |
| 8467 | cg16498681 | cg02836864 | cg13680188 |
| 8468 | cg25677394 | cg02823137 | cg17321561 |
| 8469 | cg04941831 | cg02821693 | cg02438575 |
| 8470 | cg14096074 | cg02776768 | cg04290396 |
| 8471 | cg05917419 | cg02743136 | cg03762393 |
| 8472 | cg03430597 | cg02718078 | cg20133730 |
| 8473 | cg14443041 | cg02667880 | cg09501516 |
| 8474 | cg18517266 | cg02628107 | cg09669930 |
| 8475 | cg15346619 | cg02604211 | cg04078658 |
| 8476 | cg00373245 | cg02597698 | cg18912160 |
| 8477 | cg26405979 | cg02455836 | cg04135242 |



|      |            |            |            |
|------|------------|------------|------------|
| 8478 | cg16554534 | cg02436098 | cg13940218 |
| 8479 | cg09080909 | cg02386311 | cg03143333 |
| 8480 | cg17348667 | cg02367992 | cg22750845 |
| 8481 | cg10836406 | cg02273647 | cg20338075 |
| 8482 | cg19092603 | cg02249969 | cg21045072 |
| 8483 | cg13332783 | cg02235663 | cg05336268 |
| 8484 | cg09941367 | cg02217035 | cg21927420 |
| 8485 | cg00648573 | cg02168436 | cg05894015 |
| 8486 | cg19968041 | cg02155048 | cg00806009 |
| 8487 | cg25487008 | cg02144518 | cg00639143 |
| 8488 | cg27278961 | cg02083676 | cg11203377 |
| 8489 | cg24468934 | cg01989275 | cg25793812 |
| 8490 | cg26444806 | cg01957900 | cg26187194 |
| 8491 | cg01534871 | cg01954438 | cg08463581 |
| 8492 | cg00961932 | cg01945624 | cg06675951 |
| 8493 | cg02650728 | cg01885080 | cg08831531 |
| 8494 | cg19897003 | cg01860459 | cg16883145 |
| 8495 | cg13431342 | cg01793617 | cg00592944 |
| 8496 | cg05493407 | cg01778908 | cg13414581 |
| 8497 | cg01885080 | cg01727408 | cg23533073 |
| 8498 | cg23834919 | cg01679473 | cg03095814 |
| 8499 | cg24386135 | cg01669185 | cg09845604 |
| 8500 | cg03938110 | cg01653532 | cg13116061 |
| 8501 | cg00001687 | cg01592387 | cg18673163 |
| 8502 | cg04906603 | cg01484266 | cg23509272 |
| 8503 | cg26847438 | cg01380884 | cg09198283 |
| 8504 | cg11523799 | cg01288155 | cg15346619 |
| 8505 | cg18699466 | cg01283625 | cg09925620 |
| 8506 | cg01661567 | cg01216078 | cg21404476 |
| 8507 | cg02462933 | cg01108243 | cg27360231 |
| 8508 | cg02010686 | cg00948881 | cg06621620 |
| 8509 | cg04095995 | cg00936935 | cg02455836 |
| 8510 | cg01501896 | cg00920069 | cg15637234 |
| 8511 | cg15929241 | cg00854594 | cg25442652 |
| 8512 | cg27538859 | cg00713247 | cg12591689 |
| 8513 | cg06193668 | cg00711584 | cg17780565 |
| 8514 | cg23756143 | cg00706207 | cg20566450 |
| 8515 | cg11835806 | cg00681103 | cg01195672 |
| 8516 | cg26934993 | cg00674220 | cg17428748 |
| 8517 | cg23079522 | cg00639837 | cg15155463 |
| 8518 | cg06752482 | cg00618323 | cg02221422 |
| 8519 | cg24135293 | cg00545796 | cg02938429 |
| 8520 | cg12982283 | cg00426425 | cg26818159 |
| 8521 | cg05546878 | cg00362381 | cg17853089 |
| 8522 | cg15317049 | cg00275234 | cg26880445 |
| 8523 | cg13761321 | cg00054496 | cg05369142 |
| 8524 | cg13392861 | cg27594157 | cg13849999 |
| 8525 | cg25513535 | cg27466615 | cg12176815 |
| 8526 | cg16776331 | cg27278001 | cg19992808 |
| 8527 | cg00347938 | cg27180994 | cg10356060 |
| 8528 | cg06246999 | cg27118035 | cg20941528 |
| 8529 | cg01679473 | cg27054948 | cg23530850 |
| 8530 | cg25112643 | cg27008230 | cg17586345 |

|      |            |            |            |
|------|------------|------------|------------|
| 8531 | cg07530947 | cg26853057 | cg03884079 |
| 8532 | cg03472610 | cg26815121 | cg20761844 |
| 8533 | cg19441674 | cg26620147 | cg24727133 |
| 8534 | cg00955867 | cg26441230 | cg01260146 |
| 8535 | cg27247807 | cg26362368 | cg12766383 |
| 8536 | cg07214314 | cg26225655 | cg03077492 |
| 8537 | cg09795809 | cg26105283 | cg09789315 |
| 8538 | cg01801191 | cg25932290 | cg24018760 |
| 8539 | cg27478020 | cg25794830 | cg16289101 |
| 8540 | cg04847386 | cg25745246 | cg23066057 |
| 8541 | cg14694342 | cg25595431 | cg00362381 |
| 8542 | cg04800715 | cg25555068 | cg21747652 |
| 8543 | cg03216506 | cg25517187 | cg05181397 |
| 8544 | cg14095720 | cg25203085 | cg03444965 |
| 8545 | cg05873568 | cg25187161 | cg03168587 |
| 8546 | cg11412527 | cg25141943 | cg19437281 |
| 8547 | cg03355204 | cg25005357 | cg27054948 |
| 8548 | cg14833024 | cg24870662 | cg20436707 |
| 8549 | cg16650096 | cg24670927 | cg12485685 |
| 8550 | cg03141944 | cg24541176 | cg14264773 |
| 8551 | cg05678033 | cg24525461 | cg01710084 |
| 8552 | cg10307940 | cg24455383 | cg18855096 |
| 8553 | cg21570597 | cg24429037 | cg15416179 |
| 8554 | cg13475704 | cg24366425 | cg22251048 |
| 8555 | cg05780637 | cg24271718 | cg11973602 |
| 8556 | cg14362630 | cg24264451 | cg02172773 |
| 8557 | cg17853089 | cg24135293 | cg17693222 |
| 8558 | cg03333776 | cg24102222 | cg00275234 |
| 8559 | cg21755755 | cg23959115 | cg23225637 |
| 8560 | cg25595431 | cg23784046 | cg07067280 |
| 8561 | cg13298538 | cg23679798 | cg10689512 |
| 8562 | cg15737302 | cg23114772 | cg02146941 |
| 8563 | cg25866889 | cg23104930 | cg02667335 |
| 8564 | cg04293307 | cg23058246 | cg15935860 |
| 8565 | cg03853328 | cg22895198 | cg09009788 |
| 8566 | cg26543333 | cg22846498 | cg07746532 |
| 8567 | cg01792229 | cg22811647 | cg24734735 |
| 8568 | cg06618764 | cg22657772 | cg03953506 |
| 8569 | cg12403778 | cg22345063 | cg17650713 |
| 8570 | cg16741602 | cg22256482 | cg18610958 |
| 8571 | cg00520380 | cg21881364 | cg18968623 |
| 8572 | cg11320499 | cg21856603 | cg14971998 |
| 8573 | cg00286014 | cg21806238 | cg25763426 |
| 8574 | cg08159271 | cg21805118 | cg09742751 |
| 8575 | cg02742455 | cg21793437 | cg20489239 |
| 8576 | cg02696830 | cg21784096 | cg04591732 |
| 8577 | cg03511735 | cg21618273 | cg27095984 |
| 8578 | cg20927312 | cg21574855 | cg09754828 |
| 8579 | cg05261433 | cg21475781 | cg00623312 |
| 8580 | cg04165857 | cg21376658 | cg07951978 |
| 8581 | cg20027331 | cg21276022 | cg12936779 |
| 8582 | cg07997682 | cg21238609 | cg10664618 |
| 8583 | cg26709300 | cg21177940 | cg07620571 |

|      |            |            |            |
|------|------------|------------|------------|
| 8584 | cg25825970 | cg20963020 | cg16521443 |
| 8585 | cg18492803 | cg20594316 | cg10371037 |
| 8586 | cg02711397 | cg20293725 | cg13676538 |
| 8587 | cg03231163 | cg20283716 | cg13951223 |
| 8588 | cg25590335 | cg20265951 | cg09743906 |
| 8589 | cg10830021 | cg19925801 | cg26165908 |
| 8590 | cg02187822 | cg19839325 | cg01486910 |
| 8591 | cg13062396 | cg19831403 | cg20544406 |
| 8592 | cg08774694 | cg19786422 | cg06836544 |
| 8593 | cg03760490 | cg19763281 | cg26524387 |
| 8594 | cg11633461 | cg19486804 | cg08812784 |
| 8595 | cg16960291 | cg19404500 | cg04055053 |
| 8596 | cg02595280 | cg19400179 | cg09976716 |
| 8597 | cg06826908 | cg19399165 | cg02743136 |
| 8598 | cg23457862 | cg19219672 | cg21393818 |
| 8599 | cg18639238 | cg19020855 | cg23886515 |
| 8600 | cg27440150 | cg18704595 | cg14519294 |
| 8601 | cg27054948 | cg18699466 | cg27634115 |
| 8602 | cg06061760 | cg18317492 | cg02297063 |
| 8603 | cg21511816 | cg18174089 | cg05867158 |
| 8604 | cg14890730 | cg18098187 | cg21532408 |
| 8605 | cg26361671 | cg18050634 | cg18533833 |
| 8606 | cg26540925 | cg17931529 | cg07477924 |
| 8607 | cg00092644 | cg17877600 | cg04175417 |
| 8608 | cg06332339 | cg17821664 | cg09029046 |
| 8609 | cg26529094 | cg17426166 | cg18083415 |
| 8610 | cg20586531 | cg17054783 | cg04534503 |
| 8611 | cg05468559 | cg17049328 | cg05988219 |
| 8612 | cg26281621 | cg16898124 | cg00620733 |
| 8613 | cg01856887 | cg16880392 | cg01780685 |
| 8614 | cg16642938 | cg16861209 | cg00863271 |
| 8615 | cg26656452 | cg16726435 | cg08132025 |
| 8616 | cg21750915 | cg16617141 | cg18249380 |
| 8617 | cg21026566 | cg16530165 | cg23235334 |
| 8618 | cg10171557 | cg16499416 | cg20685600 |
| 8619 | cg04582672 | cg16427420 | cg11027058 |
| 8620 | cg08447373 | cg16383573 | cg10902667 |
| 8621 | cg16554164 | cg16311946 | cg16532399 |
| 8622 | cg10812717 | cg16245035 | cg27567761 |
| 8623 | cg08095452 | cg16236270 | cg27532130 |
| 8624 | cg07872947 | cg16200325 | cg08291302 |
| 8625 | cg25232510 | cg16051954 | cg15888693 |
| 8626 | cg01404873 | cg15991104 | cg22217449 |
| 8627 | cg27572074 | cg15956469 | cg02364518 |
| 8628 | cg25736617 | cg15712057 | cg04687939 |
| 8629 | cg23976336 | cg15676677 | cg25135706 |
| 8630 | cg03882967 | cg15627277 | cg25199850 |
| 8631 | cg14723032 | cg15548656 | cg13750566 |
| 8632 | cg16217297 | cg15543534 | cg01553388 |
| 8633 | cg05370136 | cg15465367 | cg04158792 |
| 8634 | cg01567615 | cg14879569 | cg26297299 |
| 8635 | cg01361499 | cg14651518 | cg25161092 |
| 8636 | cg19241089 | cg14599015 | cg17537252 |

|      |            |            |            |
|------|------------|------------|------------|
| 8637 | cg14081251 | cg14473062 | cg03684893 |
| 8638 | cg04473209 | cg14431528 | cg11576988 |
| 8639 | cg13957126 | cg14401746 | cg18348566 |
| 8640 | cg11781564 | cg14294646 | cg01885080 |
| 8641 | cg23887746 | cg14166377 | cg13467292 |
| 8642 | cg26941073 | cg14101687 | cg12392429 |
| 8643 | cg13737493 | cg14062899 | cg19296662 |
| 8644 | cg05062820 | cg14037652 | cg07701911 |
| 8645 | cg09828346 | cg13821287 | cg06387204 |
| 8646 | cg05327192 | cg13808180 | cg16245035 |
| 8647 | cg18384190 | cg13763232 | cg10774480 |
| 8648 | cg09612502 | cg13582959 | cg00818557 |
| 8649 | cg03575245 | cg13393917 | cg05159066 |
| 8650 | cg13414581 | cg13319468 | cg01337736 |
| 8651 | cg02876276 | cg13248406 | cg14641266 |
| 8652 | cg16784943 | cg12743638 | cg11585301 |
| 8653 | cg15710638 | cg12681784 | cg21389456 |
| 8654 | cg14204266 | cg12511749 | cg26987720 |
| 8655 | cg27323343 | cg12491594 | cg15988812 |
| 8656 | cg01953240 | cg12474695 | cg24530000 |
| 8657 | cg23876072 | cg12468255 | cg09238162 |
| 8658 | cg04650653 | cg12417871 | cg05340658 |
| 8659 | cg17822706 | cg12384918 | cg21998505 |
| 8660 | cg01454947 | cg12284521 | cg04077677 |
| 8661 | cg08705647 | cg12149319 | cg13429555 |
| 8662 | cg13276704 | cg12062088 | cg25506288 |
| 8663 | cg06873590 | cg11980500 | cg12522144 |
| 8664 | cg14819399 | cg11952839 | cg02720600 |
| 8665 | cg26338030 | cg11909137 | cg01377082 |
| 8666 | cg26868306 | cg11865296 | cg21011702 |
| 8667 | cg27588653 | cg11697861 | cg07929112 |
| 8668 | cg10498921 | cg11633461 | cg01415527 |
| 8669 | cg13431028 | cg11612905 | cg13165390 |
| 8670 | cg00869582 | cg11390978 | cg11457582 |
| 8671 | cg12104982 | cg11390504 | cg09824023 |
| 8672 | cg23921860 | cg11372818 | cg23754431 |
| 8673 | cg02534048 | cg11254847 | cg20342460 |
| 8674 | cg05668807 | cg11241684 | cg11979837 |
| 8675 | cg06509598 | cg11203377 | cg14326263 |
| 8676 | cg07132183 | cg11148096 | cg23735646 |
| 8677 | cg24594604 | cg11135937 | cg10152624 |
| 8678 | cg04132177 | cg11124652 | cg23820770 |
| 8679 | cg10235845 | cg11051022 | cg16597437 |
| 8680 | cg18465694 | cg10902667 | cg18348731 |
| 8681 | cg27604702 | cg10796068 | cg21751147 |
| 8682 | cg10865444 | cg10589235 | cg01442132 |
| 8683 | cg04175292 | cg10510707 | cg18149689 |
| 8684 | cg22054793 | cg10317175 | cg22576033 |
| 8685 | cg09961689 | cg10109146 | cg13461718 |
| 8686 | cg08929612 | cg10077985 | cg05361262 |
| 8687 | cg18729298 | cg09637963 | cg03695693 |
| 8688 | cg17700443 | cg09494646 | cg09886931 |
| 8689 | cg02389084 | cg09459955 | cg09951320 |

|      |            |            |            |
|------|------------|------------|------------|
| 8690 | cg14952488 | cg09372617 | cg22082745 |
| 8691 | cg20800216 | cg09184899 | cg04360147 |
| 8692 | cg09258240 | cg09124230 | cg11254317 |
| 8693 | cg18318722 | cg09074223 | cg22846611 |
| 8694 | cg15478081 | cg08831531 | cg10294836 |
| 8695 | cg19332409 | cg08826080 | cg03089923 |
| 8696 | cg26714514 | cg08818866 | cg20794957 |
| 8697 | cg25939647 | cg08701675 | cg06397381 |
| 8698 | cg12356870 | cg08616182 | cg15048900 |
| 8699 | cg27130493 | cg08553857 | cg09711421 |
| 8700 | cg26639076 | cg08537794 | cg23119433 |
| 8701 | cg11527930 | cg08441269 | cg25852715 |
| 8702 | cg18878210 | cg08426200 | cg16442814 |
| 8703 | cg19640754 | cg08386696 | cg12995933 |
| 8704 | cg01309081 | cg08258867 | cg03556771 |
| 8705 | cg06662568 | cg08168529 | cg03892631 |
| 8706 | cg00550617 | cg08089518 | cg01314034 |
| 8707 | cg10864794 | cg07979388 | cg24856699 |
| 8708 | cg11046030 | cg07962882 | cg27650212 |
| 8709 | cg09657114 | cg07841877 | cg23401741 |
| 8710 | cg04290396 | cg07813622 | cg21593628 |
| 8711 | cg11879277 | cg07732097 | cg21057429 |
| 8712 | cg24812143 | cg07598035 | cg22819824 |
| 8713 | cg10709026 | cg07483007 | cg03738365 |
| 8714 | cg08818866 | cg07433453 | cg26341003 |
| 8715 | cg06696911 | cg07206676 | cg02583282 |
| 8716 | cg21476203 | cg07204803 | cg16453673 |
| 8717 | cg25865108 | cg07091062 | cg23738548 |
| 8718 | cg03108347 | cg07050599 | cg14462369 |
| 8719 | cg13133492 | cg07020987 | cg22890571 |
| 8720 | cg06183287 | cg06881421 | cg01110955 |
| 8721 | cg18560571 | cg06836544 | cg14937228 |
| 8722 | cg25178749 | cg06622892 | cg06084403 |
| 8723 | cg10488777 | cg06549824 | cg01287012 |
| 8724 | cg09988676 | cg06513888 | cg10890199 |
| 8725 | cg01860459 | cg06371291 | cg13457217 |
| 8726 | cg07665929 | cg06333135 | cg24264451 |
| 8727 | cg07875385 | cg06321304 | cg02454890 |
| 8728 | cg02838178 | cg06313479 | cg20137441 |
| 8729 | cg08985282 | cg06219732 | cg26001655 |
| 8730 | cg23514135 | cg06078337 | cg09123961 |
| 8731 | cg01306662 | cg06061092 | cg09776314 |
| 8732 | cg00963675 | cg05975710 | cg08750440 |
| 8733 | cg02351425 | cg05780637 | cg17364872 |
| 8734 | cg23108126 | cg05711037 | cg18842598 |
| 8735 | cg13701991 | cg05528280 | cg22466400 |
| 8736 | cg09028383 | cg05488981 | cg10965164 |
| 8737 | cg00903308 | cg05482864 | cg00410600 |
| 8738 | cg06263395 | cg05459650 | cg14560240 |
| 8739 | cg16770054 | cg05452391 | cg11809476 |
| 8740 | cg27663249 | cg05400252 | cg22194948 |
| 8741 | cg01691522 | cg05349039 | cg12071544 |
| 8742 | cg19603100 | cg05337637 | cg06921552 |

|      |            |            |            |
|------|------------|------------|------------|
| 8743 | cg25749254 | cg05272587 | cg01324452 |
| 8744 | cg07891483 | cg05269678 | cg24830876 |
| 8745 | cg02722657 | cg04986373 | cg20658711 |
| 8746 | cg08619651 | cg04921335 | cg20407868 |
| 8747 | cg02936315 | cg04805065 | cg27382164 |
| 8748 | cg07184807 | cg04800715 | cg02048412 |
| 8749 | cg07888912 | cg04719721 | cg19200440 |
| 8750 | cg10550166 | cg04703221 | cg10990188 |
| 8751 | cg26037660 | cg04624413 | cg07880135 |
| 8752 | cg27092248 | cg04618903 | cg20490386 |
| 8753 | cg20190649 | cg04535391 | cg27343801 |
| 8754 | cg00830283 | cg04505809 | cg07986222 |
| 8755 | cg17898124 | cg04398282 | cg13962153 |
| 8756 | cg05516020 | cg04356968 | cg02304427 |
| 8757 | cg07283582 | cg03939897 | cg13994897 |
| 8758 | cg10809282 | cg03811905 | cg10813908 |
| 8759 | cg20785796 | cg03764767 | cg12822242 |
| 8760 | cg17193551 | cg03556771 | cg02825527 |
| 8761 | cg09957712 | cg03514843 | cg13348246 |
| 8762 | cg00948274 | cg03441279 | cg06369532 |
| 8763 | cg00582671 | cg03385114 | cg01954438 |
| 8764 | cg27406975 | cg03379270 | cg15520941 |
| 8765 | cg26311262 | cg03270929 | cg16114651 |
| 8766 | cg19120897 | cg03216729 | cg23614979 |
| 8767 | cg26685539 | cg03131732 | cg10968396 |
| 8768 | cg25834632 | cg03110167 | cg04296187 |
| 8769 | cg19951269 | cg03072692 | cg06483517 |
| 8770 | cg02097309 | cg02976723 | cg04906603 |
| 8771 | cg10102736 | cg02961196 | cg12878382 |
| 8772 | cg23351271 | cg02818775 | cg12971523 |
| 8773 | cg22367886 | cg02806032 | cg23957850 |
| 8774 | cg20699157 | cg02723533 | cg08183125 |
| 8775 | cg04854911 | cg02685896 | cg27604702 |
| 8776 | cg26642540 | cg02656049 | cg15802323 |
| 8777 | cg05014846 | cg02556345 | cg08943374 |
| 8778 | cg13851989 | cg02480405 | cg00753492 |
| 8779 | cg26368942 | cg02463970 | cg26066560 |
| 8780 | cg04560531 | cg02363010 | cg14144513 |
| 8781 | cg19233001 | cg02283353 | cg11198094 |
| 8782 | cg02579022 | cg02237875 | cg02714192 |
| 8783 | cg04353997 | cg02193283 | cg07066794 |
| 8784 | cg08186671 | cg02190127 | cg25977879 |
| 8785 | cg00688979 | cg02065141 | cg11409060 |
| 8786 | cg04137490 | cg01881549 | cg04724190 |
| 8787 | cg13573244 | cg01780685 | cg18493371 |
| 8788 | cg12549211 | cg01723892 | cg09680719 |
| 8789 | cg10370426 | cg01696984 | cg17822706 |
| 8790 | cg19495444 | cg01613294 | cg23216122 |
| 8791 | cg07296260 | cg01598009 | cg07976390 |
| 8792 | cg00959308 | cg01578875 | cg07925615 |
| 8793 | cg13162581 | cg01388243 | cg13675389 |
| 8794 | cg00513981 | cg01343045 | cg19706515 |
| 8795 | cg23719367 | cg01290421 | cg13109865 |

|      |            |            |            |
|------|------------|------------|------------|
| 8796 | cg19220272 | cg01274233 | cg03137908 |
| 8797 | cg14270348 | cg01185921 | cg23834427 |
| 8798 | cg26165908 | cg01055121 | cg18067847 |
| 8799 | cg04479713 | cg01046905 | cg02147208 |
| 8800 | cg15125438 | cg01023169 | cg00990874 |
| 8801 | cg19274401 | cg00969565 | cg06826908 |
| 8802 | cg02573234 | cg00943124 | cg12153709 |
| 8803 | cg19827875 | cg00680277 | cg21570597 |
| 8804 | cg13947999 | cg00610577 | cg09379188 |
| 8805 | cg23957850 | cg00512872 | cg00039385 |
| 8806 | cg09159050 | cg00501242 | cg14321522 |
| 8807 | cg23630423 | cg00470794 | cg17599809 |
| 8808 | cg26463171 | cg00412142 | cg19358589 |
| 8809 | cg10109635 | cg00400992 | cg24360745 |
| 8810 | cg00356131 | cg00226615 | cg14159036 |
| 8811 | cg09304617 | cg00209918 | cg04729730 |
| 8812 | cg00861010 | cg00180097 | cg25227364 |
| 8813 | cg13366501 | cg00047338 | cg06056558 |
| 8814 | cg23690444 | cg27630540 | cg07512971 |
| 8815 | cg06746744 | cg27423208 | cg16498681 |
| 8816 | cg00123317 | cg27394987 | cg03269976 |
| 8817 | cg07115952 | cg27323343 | cg20017253 |
| 8818 | cg14094409 | cg27288127 | cg20667709 |
| 8819 | cg00437969 | cg27226927 | cg19863040 |
| 8820 | cg14783283 | cg27128001 | cg07495357 |
| 8821 | cg24969303 | cg27078464 | cg08972190 |
| 8822 | cg18461635 | cg26408861 | cg00918130 |
| 8823 | cg25784372 | cg25490527 | cg11028291 |
| 8824 | cg19445044 | cg25481201 | cg00802617 |
| 8825 | cg13194638 | cg25439867 | cg11512026 |
| 8826 | cg22529541 | cg24885442 | cg23722792 |
| 8827 | cg00007036 | cg24706188 | cg04002957 |
| 8828 | cg00290626 | cg24037270 | cg25028527 |
| 8829 | cg22286382 | cg23825482 | cg07166333 |
| 8830 | cg00352031 | cg23748751 | cg09253696 |
| 8831 | cg05415131 | cg23677881 | cg09796786 |
| 8832 | cg21574855 | cg23322122 | cg00488512 |
| 8833 | cg03939897 | cg23254569 | cg25607321 |
| 8834 | cg08263571 | cg23117250 | cg25954194 |
| 8835 | cg04847478 | cg23072051 | cg24093176 |
| 8836 | cg03376089 | cg22999502 | cg20650515 |
| 8837 | cg06372475 | cg22867608 | cg16826504 |
| 8838 | cg10194844 | cg22622164 | cg19253339 |
| 8839 | cg20784591 | cg22472304 | cg09975093 |
| 8840 | cg04998447 | cg21806750 | cg18203044 |
| 8841 | cg11093939 | cg21747652 | cg24408200 |
| 8842 | cg17636986 | cg20863668 | cg20254251 |
| 8843 | cg05602356 | cg20658711 | cg25892761 |
| 8844 | cg00937817 | cg20566450 | cg11806749 |
| 8845 | cg26739233 | cg20412217 | cg00244267 |
| 8846 | cg24773493 | cg20229025 | cg07907315 |
| 8847 | cg14200357 | cg19975759 | cg15283164 |
| 8848 | cg23401741 | cg19643097 | cg16666964 |

|      |            |            |            |
|------|------------|------------|------------|
| 8849 | cg11701615 | cg19437281 | cg10515332 |
| 8850 | cg05035470 | cg19055828 | cg19747744 |
| 8851 | cg19793499 | cg19047283 | cg18636829 |
| 8852 | cg26524387 | cg18930928 | cg02656049 |
| 8853 | cg17616283 | cg18652285 | cg19500393 |
| 8854 | cg22963109 | cg18581669 | cg14010305 |
| 8855 | cg01824603 | cg18565130 | cg14565408 |
| 8856 | cg15181351 | cg18485872 | cg00060715 |
| 8857 | cg13840520 | cg18266458 | cg25945504 |
| 8858 | cg19998675 | cg18058895 | cg03919694 |
| 8859 | cg02325128 | cg17977133 | cg20154222 |
| 8860 | cg05750323 | cg17789138 | cg25010788 |
| 8861 | cg27127017 | cg17278466 | cg14030593 |
| 8862 | cg05813328 | cg16772023 | cg11272705 |
| 8863 | cg03218909 | cg16766632 | cg04510807 |
| 8864 | cg07463059 | cg16766036 | cg22555262 |
| 8865 | cg19883388 | cg16668534 | cg22913843 |
| 8866 | cg03068497 | cg16125397 | cg14547067 |
| 8867 | cg17693222 | cg15988812 | cg14234732 |
| 8868 | cg26100137 | cg15881332 | cg26365784 |
| 8869 | cg20122645 | cg15383141 | cg09649196 |
| 8870 | cg02812189 | cg15089181 | cg17444642 |
| 8871 | cg10642094 | cg14995235 | cg26405979 |
| 8872 | cg17534540 | cg14939096 | cg15850851 |
| 8873 | cg00785831 | cg14782266 | cg09318508 |
| 8874 | cg02486904 | cg14616881 | cg16664095 |
| 8875 | cg02013841 | cg14598025 | cg08206156 |
| 8876 | cg06549824 | cg14565439 | cg22046535 |
| 8877 | cg05884394 | cg14507658 | cg15191744 |
| 8878 | cg04590974 | cg14500614 | cg04399647 |
| 8879 | cg01375259 | cg14429457 | cg08910524 |
| 8880 | cg13232249 | cg14041194 | cg17418956 |
| 8881 | cg03254566 | cg13838713 | cg04124361 |
| 8882 | cg18989491 | cg13694343 | cg14742341 |
| 8883 | cg18938534 | cg13222945 | cg16223967 |
| 8884 | cg09519954 | cg12678686 | cg22765117 |
| 8885 | cg16711983 | cg12529228 | cg18400889 |
| 8886 | cg11254847 | cg12467090 | cg13514824 |
| 8887 | cg15894581 | cg12412384 | cg08974450 |
| 8888 | cg26804423 | cg12271433 | cg11997603 |
| 8889 | cg04622001 | cg11852646 | cg00961416 |
| 8890 | cg01359676 | cg11725852 | cg25568745 |
| 8891 | cg19956769 | cg11724511 | cg12796332 |
| 8892 | cg16242615 | cg11024450 | cg19598875 |
| 8893 | cg00223767 | cg10830021 | cg25461827 |
| 8894 | cg19640166 | cg10667207 | cg04261952 |
| 8895 | cg04341806 | cg10363202 | cg24294013 |
| 8896 | cg16560256 | cg10311315 | cg04844977 |
| 8897 | cg25275372 | cg10262770 | cg18036710 |
| 8898 | cg21964551 | cg10244706 | cg06916574 |
| 8899 | cg21483216 | cg09941367 | cg03639170 |
| 8900 | cg19494591 | cg09680719 | cg01655150 |
| 8901 | cg26280578 | cg09268338 | cg22047338 |



|      |            |            |            |
|------|------------|------------|------------|
| 8902 | cg04034290 | cg09255505 | cg11087939 |
| 8903 | cg03135948 | cg09073443 | cg03674127 |
| 8904 | cg10969245 | cg08894066 | cg19240021 |
| 8905 | cg04842880 | cg08843756 | cg19277672 |
| 8906 | cg13526766 | cg08535779 | cg21409449 |
| 8907 | cg12895304 | cg08112616 | cg06748078 |
| 8908 | cg04384810 | cg07160118 | cg13587802 |
| 8909 | cg01287012 | cg07102397 | cg04800715 |
| 8910 | cg06749819 | cg07086112 | cg09268338 |
| 8911 | cg22222413 | cg07078758 | cg01333205 |
| 8912 | cg02365900 | cg06796435 | cg19116924 |
| 8913 | cg19358589 | cg06750802 | cg11722816 |
| 8914 | cg13680246 | cg06632821 | cg23677881 |
| 8915 | cg09505809 | cg06621620 | cg11161142 |
| 8916 | cg03971344 | cg06397381 | cg26466921 |
| 8917 | cg12776287 | cg06338958 | cg13165992 |
| 8918 | cg05631399 | cg06264060 | cg03938353 |
| 8919 | cg26180006 | cg06246000 | cg17993073 |
| 8920 | cg01971590 | cg05989746 | cg03988119 |
| 8921 | cg11468233 | cg05876246 | cg15617336 |
| 8922 | cg13661703 | cg05869732 | cg03333116 |
| 8923 | cg21573345 | cg05846044 | cg17024719 |
| 8924 | cg15874642 | cg05777316 | cg10673740 |
| 8925 | cg09119854 | cg05757474 | cg12797609 |
| 8926 | cg11562411 | cg05590948 | cg14101193 |
| 8927 | cg27632471 | cg05404787 | cg05615230 |
| 8928 | cg03739877 | cg05188868 | cg05918682 |
| 8929 | cg23421128 | cg04460041 | cg16898124 |
| 8930 | cg06332666 | cg04099803 | cg15072038 |
| 8931 | cg26164879 | cg03853328 | cg26819427 |
| 8932 | cg19435621 | cg03834055 | cg06460400 |
| 8933 | cg23280294 | cg03726437 | cg09858160 |
| 8934 | cg16159491 | cg03648611 | cg03808580 |
| 8935 | cg18592315 | cg03495660 | cg02364610 |
| 8936 | cg15470344 | cg03142002 | cg16255804 |
| 8937 | cg04311473 | cg03051577 | cg23104930 |
| 8938 | cg18120259 | cg03013188 | cg26368942 |
| 8939 | cg08038054 | cg02972941 | cg06769510 |
| 8940 | cg06793277 | cg02372856 | cg10071852 |
| 8941 | cg08986340 | cg02327654 | cg03789088 |
| 8942 | cg04575609 | cg02317251 | cg10392840 |
| 8943 | cg16398832 | cg02147208 | cg27004760 |
| 8944 | cg12156838 | cg01851970 | cg12448664 |
| 8945 | cg03727333 | cg01385157 | cg18925548 |
| 8946 | cg27248741 | cg01342572 | cg26941073 |
| 8947 | cg19995891 | cg01197763 | cg05554592 |
| 8948 | cg00512280 | cg01032946 | cg16026212 |
| 8949 | cg02009766 | cg00994984 | cg05727180 |
| 8950 | cg20329085 | cg00981003 | cg00414709 |
| 8951 | cg00783706 | cg00747342 | cg12356870 |
| 8952 | cg10877385 | cg00688979 | cg27339974 |
| 8953 | cg17781669 | cg00637826 | cg09063434 |
| 8954 | cg15853299 | cg00352652 | cg27394987 |
