# Supplementary material for: Identification of Methylation Signatures and Rules for Sarcoma Subtypes by Machine Learning Methods
Source: Hindawi journal article supplement (doi:10.1155/2022/5297235), 2022-01-01
Supplement: f1 [file 5297235.f1.zip]

**Table S6:** Classification rules generated by decision tree using its optimal features on three feature lists.

(1) Rules on the LASSO feature list

|                                                       |                                                           |
|-------------------------------------------------------|-----------------------------------------------------------|
| Rules_0                                               | passed counts:72                                          |
| node_0:<br>feature_name=cg11915444                    | feature_id[4116].value <=<br>threshold=0.3402601182460785 |
| node_1:<br>feature_name=cg00982952                    | feature_id[1071].value <=<br>threshold=0.7386334538459778 |
| Class: Ewing sarcoma (EWING)                          |                                                           |
|                                                       |                                                           |
| Rules_1                                               | passed counts:70                                          |
| node_0:<br>feature_name=cg11915444                    | feature_id[4116].value ><br>threshold=0.3402601182460785  |
| node_10:<br>feature_name=cg12109728                   | feature_id[4182].value ><br>threshold=0.7068270146846771  |
| node_20:<br>feature_name=cg10844382                   | feature_id[3856].value ><br>threshold=0.5988894104957581  |
| node_24:<br>feature_name=cg00631702                   | feature_id[943].value ><br>threshold=0.37470583617687225  |
| node_352:<br>feature_name=cg07027613                  | feature_id[549].value ><br>threshold=0.22842608392238617  |
| node_360:<br>feature_name=cg18406924                  | feature_id[5844].value ><br>threshold=0.3586410731077194  |
| Class: high-grade conventional osteosarcoma (OS (HG)) |                                                           |
|                                                       |                                                           |
| Rules_2                                               | passed counts:67                                          |
| node_0:<br>feature_name=cg11915444                    | feature_id[4116].value ><br>threshold=0.3402601182460785  |
| node_10:<br>feature_name=cg12109728                   | feature_id[4182].value <=<br>threshold=0.7068270146846771 |
| node_11:<br>feature_name=cg23902076                   | feature_id[7131].value <=<br>threshold=0.8691235482692719 |
| Class: chordoma (CHORD)                               |                                                           |
|                                                       |                                                           |
| Rules_3                                               | passed counts:64                                          |
| node_0:<br>feature_name=cg11915444                    | feature_id[4116].value ><br>threshold=0.3402601182460785  |
| node_10:<br>feature_name=cg12109728                   | feature_id[4182].value ><br>threshold=0.7068270146846771  |
| node_20:<br>feature_name=cg10844382                   | feature_id[3856].value ><br>threshold=0.5988894104957581  |

|                                     |                                                           |
|-------------------------------------|-----------------------------------------------------------|
| node_24:<br>feature_name=cg00631702 | feature_id[943].value <=<br>threshold=0.37470583617687225 |
| node_25:<br>feature_name=cg07912144 | feature_id[3075].value ><br>threshold=0.5578519105911255  |
| node_29:<br>feature_name=cg24407065 | feature_id[388].value ><br>threshold=0.5364363789558411   |
| node_33:<br>feature_name=cg15275017 | feature_id[5069].value ><br>threshold=0.4538573920726776  |
| node_51:<br>feature_name=cg07281938 | feature_id[351].value <=<br>threshold=0.7506992518901825  |
| node_52:<br>feature_name=cg21189849 | feature_id[6504].value <=<br>threshold=0.7545044124126434 |
| node_53:<br>feature_name=cg11717552 | feature_id[4060].value ><br>threshold=0.8407479226589203  |
| Class: chondrosarcoma (CSA)         |                                                           |
|                                     |                                                           |
| Rules_4                             | passed counts:62                                          |
| node_0:<br>feature_name=cg11915444  | feature_id[4116].value ><br>threshold=0.3402601182460785  |
| node_10:<br>feature_name=cg12109728 | feature_id[4182].value ><br>threshold=0.7068270146846771  |
| node_20:<br>feature_name=cg10844382 | feature_id[3856].value ><br>threshold=0.5988894104957581  |
| node_24:<br>feature_name=cg00631702 | feature_id[943].value <=<br>threshold=0.37470583617687225 |
| node_25:<br>feature_name=cg07912144 | feature_id[3075].value ><br>threshold=0.5578519105911255  |
| node_29:<br>feature_name=cg24407065 | feature_id[388].value ><br>threshold=0.5364363789558411   |
| node_33:<br>feature_name=cg15275017 | feature_id[5069].value <=<br>threshold=0.4538573920726776 |
| node_34:<br>feature_name=cg08236537 | feature_id[3160].value ><br>threshold=0.4830351173877716  |
| node_46:<br>feature_name=cg13287523 | feature_id[632].value ><br>threshold=0.6652203798294067   |
| Class: leiomyosarcoma (LMS)         |                                                           |
|                                     |                                                           |
| Rules_5                             | passed counts:62                                          |
| node_0:<br>feature_name=cg11915444  | feature_id[4116].value ><br>threshold=0.3402601182460785  |
| node_10:<br>feature_name=cg12109728 | feature_id[4182].value ><br>threshold=0.7068270146846771  |

|                                               |                                                           |
|-----------------------------------------------|-----------------------------------------------------------|
| node_20:<br>feature_name=cg10844382           | feature_id[3856].value <=<br>threshold=0.5988894104957581 |
| node_21:<br>feature_name=cg02563156           | feature_id[1540].value ><br>threshold=0.6083262264728546  |
| Class: alveolar rhabdomyosarcoma (RMS (ALV))  |                                                           |
|                                               |                                                           |
| Rules_6                                       | passed counts:56                                          |
| node_0:<br>feature_name=cg11915444            | feature_id[4116].value ><br>threshold=0.3402601182460785  |
| node_10:<br>feature_name=cg12109728           | feature_id[4182].value ><br>threshold=0.7068270146846771  |
| node_20:<br>feature_name=cg10844382           | feature_id[3856].value ><br>threshold=0.5988894104957581  |
| node_24:<br>feature_name=cg00631702           | feature_id[943].value <=<br>threshold=0.37470583617687225 |
| node_25:<br>feature_name=cg07912144           | feature_id[3075].value <=<br>threshold=0.5578519105911255 |
| node_26:<br>feature_name=cg07478111           | feature_id[2959].value ><br>threshold=0.7341253161430359  |
| Class: synovial sarcoma (SYSA)                |                                                           |
|                                               |                                                           |
| Rules_7                                       | passed counts:49                                          |
| node_0:<br>feature_name=cg11915444            | feature_id[4116].value ><br>threshold=0.3402601182460785  |
| node_10:<br>feature_name=cg12109728           | feature_id[4182].value ><br>threshold=0.7068270146846771  |
| node_20:<br>feature_name=cg10844382           | feature_id[3856].value ><br>threshold=0.5988894104957581  |
| node_24:<br>feature_name=cg00631702           | feature_id[943].value <=<br>threshold=0.37470583617687225 |
| node_25:<br>feature_name=cg07912144           | feature_id[3075].value ><br>threshold=0.5578519105911255  |
| node_29:<br>feature_name=cg24407065           | feature_id[388].value <=<br>threshold=0.5364363789558411  |
| node_30:<br>feature_name=cg03300805           | feature_id[1780].value ><br>threshold=0.03215229045599699 |
| Class: gastrointestinal stromal tumour (GIST) |                                                           |
|                                               |                                                           |
| Rules_8                                       | passed counts:42                                          |
| node_0:<br>feature_name=cg11915444            | feature_id[4116].value ><br>threshold=0.3402601182460785  |
| node_10:<br>feature_name=cg12109728           | feature_id[4182].value ><br>threshold=0.7068270146846771  |

|                                                     |                                                           |
|-----------------------------------------------------|-----------------------------------------------------------|
| node_20:<br>feature_name=cg10844382                 | feature_id[3856].value ><br>threshold=0.5988894104957581  |
| node_24:<br>feature_name=cg00631702                 | feature_id[943].value <=<br>threshold=0.37470583617687225 |
| node_25:<br>feature_name=cg07912144                 | feature_id[3075].value ><br>threshold=0.5578519105911255  |
| node_29:<br>feature_name=cg24407065                 | feature_id[388].value ><br>threshold=0.5364363789558411   |
| node_33:<br>feature_name=cg15275017                 | feature_id[5069].value ><br>threshold=0.4538573920726776  |
| node_51:<br>feature_name=cg07281938                 | feature_id[351].value ><br>threshold=0.7506992518901825   |
| node_73:<br>feature_name=cg17524821                 | feature_id[5626].value <=<br>threshold=0.4504699558019638 |
| Class: desmoplastic small round cell tumour (DSRCT) |                                                           |
|                                                     |                                                           |
| Rules_9                                             | passed counts:40                                          |
| node_0:<br>feature_name=cg11915444                  | feature_id[4116].value ><br>threshold=0.3402601182460785  |
| node_10:<br>feature_name=cg12109728                 | feature_id[4182].value ><br>threshold=0.7068270146846771  |
| node_20:<br>feature_name=cg10844382                 | feature_id[3856].value ><br>threshold=0.5988894104957581  |
| node_24:<br>feature_name=cg00631702                 | feature_id[943].value <=<br>threshold=0.37470583617687225 |
| node_25:<br>feature_name=cg07912144                 | feature_id[3075].value ><br>threshold=0.5578519105911255  |
| node_29:<br>feature_name=cg24407065                 | feature_id[388].value ><br>threshold=0.5364363789558411   |
| node_33:<br>feature_name=cg15275017                 | feature_id[5069].value ><br>threshold=0.4538573920726776  |
| node_51:<br>feature_name=cg07281938                 | feature_id[351].value ><br>threshold=0.7506992518901825   |
| node_73:<br>feature_name=cg17524821                 | feature_id[5626].value ><br>threshold=0.4504699558019638  |
| node_75:<br>feature_name=cg02973735                 | feature_id[1677].value ><br>threshold=0.29383400082588196 |
| node_77:<br>feature_name=cg23345038                 | feature_id[7002].value ><br>threshold=0.6255057156085968  |
| node_79:<br>feature_name=cg17537493                 | feature_id[5630].value <=<br>threshold=0.5825372636318207 |
| node_80:<br>feature_name=cg07990390                 | feature_id[515].value <=<br>threshold=0.7988054752349854  |

|                                               |                                                            |
|-----------------------------------------------|------------------------------------------------------------|
| Class: angiosarcoma (AS)                      |                                                            |
|                                               |                                                            |
| Rules_10                                      | passed counts:39                                           |
| node_0:<br>feature_name=cg11915444            | feature_id[4116].value ><br>threshold=0.3402601182460785   |
| node_10:<br>feature_name=cg12109728           | feature_id[4182].value ><br>threshold=0.7068270146846771   |
| node_20:<br>feature_name=cg10844382           | feature_id[3856].value ><br>threshold=0.5988894104957581   |
| node_24:<br>feature_name=cg00631702           | feature_id[943].value <=<br>threshold=0.37470583617687225  |
| node_25:<br>feature_name=cg07912144           | feature_id[3075].value ><br>threshold=0.5578519105911255   |
| node_29:<br>feature_name=cg24407065           | feature_id[388].value ><br>threshold=0.5364363789558411    |
| node_33:<br>feature_name=cg15275017           | feature_id[5069].value ><br>threshold=0.4538573920726776   |
| node_51:<br>feature_name=cg07281938           | feature_id[351].value ><br>threshold=0.7506992518901825    |
| node_73:<br>feature_name=cg17524821           | feature_id[5626].value ><br>threshold=0.4504699558019638   |
| node_75:<br>feature_name=cg02973735           | feature_id[1677].value <=<br>threshold=0.29383400082588196 |
| Class: dermatofibrosarcoma protuberans (DFSP) |                                                            |
|                                               |                                                            |
| Rules_11                                      | passed counts:38                                           |
| node_0:<br>feature_name=cg11915444            | feature_id[4116].value ><br>threshold=0.3402601182460785   |
| node_10:<br>feature_name=cg12109728           | feature_id[4182].value ><br>threshold=0.7068270146846771   |
| node_20:<br>feature_name=cg10844382           | feature_id[3856].value ><br>threshold=0.5988894104957581   |
| node_24:<br>feature_name=cg00631702           | feature_id[943].value <=<br>threshold=0.37470583617687225  |
| node_25:<br>feature_name=cg07912144           | feature_id[3075].value ><br>threshold=0.5578519105911255   |
| node_29:<br>feature_name=cg24407065           | feature_id[388].value ><br>threshold=0.5364363789558411    |
| node_33:<br>feature_name=cg15275017           | feature_id[5069].value ><br>threshold=0.4538573920726776   |
| node_51:<br>feature_name=cg07281938           | feature_id[351].value ><br>threshold=0.7506992518901825    |

|                                               |                                                            |
|-----------------------------------------------|------------------------------------------------------------|
| node_73:<br>feature_name=cg17524821           | feature_id[5626].value ><br>threshold=0.4504699558019638   |
| node_75:<br>feature_name=cg02973735           | feature_id[1677].value ><br>threshold=0.29383400082588196  |
| node_77:<br>feature_name=cg23345038           | feature_id[7002].value ><br>threshold=0.6255057156085968   |
| node_79:<br>feature_name=cg17537493           | feature_id[5630].value ><br>threshold=0.5825372636318207   |
| node_85:<br>feature_name=cg12948116           | feature_id[4375].value ><br>threshold=0.5658791363239288   |
| node_347:<br>feature_name=cg15262242          | feature_id[5064].value <=<br>threshold=0.36207813024520874 |
| Class: embryonal rhabdomyosarcoma (RMS (EMB)) |                                                            |
|                                               |                                                            |
| Rules_12                                      | passed counts:38                                           |
| node_0:<br>feature_name=cg11915444            | feature_id[4116].value ><br>threshold=0.3402601182460785   |
| node_10:<br>feature_name=cg12109728           | feature_id[4182].value ><br>threshold=0.7068270146846771   |
| node_20:<br>feature_name=cg10844382           | feature_id[3856].value ><br>threshold=0.5988894104957581   |
| node_24:<br>feature_name=cg00631702           | feature_id[943].value <=<br>threshold=0.37470583617687225  |
| node_25:<br>feature_name=cg07912144           | feature_id[3075].value ><br>threshold=0.5578519105911255   |
| node_29:<br>feature_name=cg24407065           | feature_id[388].value ><br>threshold=0.5364363789558411    |
| node_33:<br>feature_name=cg15275017           | feature_id[5069].value ><br>threshold=0.4538573920726776   |
| node_51:<br>feature_name=cg07281938           | feature_id[351].value ><br>threshold=0.7506992518901825    |
| node_73:<br>feature_name=cg17524821           | feature_id[5626].value ><br>threshold=0.4504699558019638   |
| node_75:<br>feature_name=cg02973735           | feature_id[1677].value ><br>threshold=0.29383400082588196  |
| node_77:<br>feature_name=cg23345038           | feature_id[7002].value <=<br>threshold=0.6255057156085968  |
| Class: myxoid liposarcoma (MLS)               |                                                            |
|                                               |                                                            |
| Rules_13                                      | passed counts:34                                           |
| node_0:<br>feature_name=cg11915444            | feature_id[4116].value ><br>threshold=0.3402601182460785   |

|                                      |                                                            |
|--------------------------------------|------------------------------------------------------------|
| node_10:<br>feature_name=cg12109728  | feature_id[4182].value ><br>threshold=0.7068270146846771   |
| node_20:<br>feature_name=cg10844382  | feature_id[3856].value ><br>threshold=0.5988894104957581   |
| node_24:<br>feature_name=cg00631702  | feature_id[943].value <=<br>threshold=0.37470583617687225  |
| node_25:<br>feature_name=cg07912144  | feature_id[3075].value ><br>threshold=0.5578519105911255   |
| node_29:<br>feature_name=cg24407065  | feature_id[388].value ><br>threshold=0.5364363789558411    |
| node_33:<br>feature_name=cg15275017  | feature_id[5069].value ><br>threshold=0.4538573920726776   |
| node_51:<br>feature_name=cg07281938  | feature_id[351].value ><br>threshold=0.7506992518901825    |
| node_73:<br>feature_name=cg17524821  | feature_id[5626].value ><br>threshold=0.4504699558019638   |
| node_75:<br>feature_name=cg02973735  | feature_id[1677].value ><br>threshold=0.29383400082588196  |
| node_77:<br>feature_name=cg23345038  | feature_id[7002].value ><br>threshold=0.6255057156085968   |
| node_79:<br>feature_name=cg17537493  | feature_id[5630].value ><br>threshold=0.5825372636318207   |
| node_85:<br>feature_name=cg12948116  | feature_id[4375].value <=<br>threshold=0.5658791363239288  |
| node_86:<br>feature_name=cg06038180  | feature_id[2529].value ><br>threshold=0.43877437710762024  |
| node_88:<br>feature_name=cg15720017  | feature_id[5175].value ><br>threshold=0.7009969055652618   |
| node_90:<br>feature_name=cg13070215  | feature_id[314].value <=<br>threshold=0.14645694941282272  |
| node_91:<br>feature_name=cg01014262  | feature_id[1082].value <=<br>threshold=0.5737917125225067  |
| node_92:<br>feature_name=cg16863382  | feature_id[5471].value ><br>threshold=0.7200668156147003   |
| node_102:<br>feature_name=cg06633739 | feature_id[2686].value ><br>threshold=0.47115950286388397  |
| node_126:<br>feature_name=cg22946562 | feature_id[744].value <=<br>threshold=0.6194809079170227   |
| node_127:<br>feature_name=cg23920016 | feature_id[7139].value <=<br>threshold=0.7449243068695068  |
| node_128:<br>feature_name=cg16521032 | feature_id[5379].value ><br>threshold=0.8948074877262115   |
| node_136:<br>feature_name=cg22345063 | feature_id[6755].value <=<br>threshold=0.38597847521305084 |

|                                         |                                                           |
|-----------------------------------------|-----------------------------------------------------------|
| node_137:<br>feature_name=cg24033503    | feature_id[7174].value ><br>threshold=0.9229673147201538  |
| Class: undifferentiated sarcoma (USARC) |                                                           |
|                                         |                                                           |
| Rules_14                                | passed counts:30                                          |
| node_0:<br>feature_name=cg11915444      | feature_id[4116].value ><br>threshold=0.3402601182460785  |
| node_10:<br>feature_name=cg12109728     | feature_id[4182].value ><br>threshold=0.7068270146846771  |
| node_20:<br>feature_name=cg10844382     | feature_id[3856].value ><br>threshold=0.5988894104957581  |
| node_24:<br>feature_name=cg00631702     | feature_id[943].value <=<br>threshold=0.37470583617687225 |
| node_25:<br>feature_name=cg07912144     | feature_id[3075].value ><br>threshold=0.5578519105911255  |
| node_29:<br>feature_name=cg24407065     | feature_id[388].value ><br>threshold=0.5364363789558411   |
| node_33:<br>feature_name=cg15275017     | feature_id[5069].value ><br>threshold=0.4538573920726776  |
| node_51:<br>feature_name=cg07281938     | feature_id[351].value ><br>threshold=0.7506992518901825   |
| node_73:<br>feature_name=cg17524821     | feature_id[5626].value ><br>threshold=0.4504699558019638  |
| node_75:<br>feature_name=cg02973735     | feature_id[1677].value ><br>threshold=0.29383400082588196 |
| node_77:<br>feature_name=cg23345038     | feature_id[7002].value ><br>threshold=0.6255057156085968  |
| node_79:<br>feature_name=cg17537493     | feature_id[5630].value ><br>threshold=0.5825372636318207  |
| node_85:<br>feature_name=cg12948116     | feature_id[4375].value <=<br>threshold=0.5658791363239288 |
| node_86:<br>feature_name=cg06038180     | feature_id[2529].value ><br>threshold=0.43877437710762024 |
| node_88:<br>feature_name=cg15720017     | feature_id[5175].value <=<br>threshold=0.7009969055652618 |
| Class: solitary fibrous tumour (SFT)    |                                                           |
|                                         |                                                           |
| Rules_15                                | passed counts:30                                          |
| node_0:<br>feature_name=cg11915444      | feature_id[4116].value ><br>threshold=0.3402601182460785  |
| node_10:<br>feature_name=cg12109728     | feature_id[4182].value ><br>threshold=0.7068270146846771  |



|                                     |                                                            |
|-------------------------------------|------------------------------------------------------------|
| node_20:<br>feature_name=cg10844382 | feature_id[3856].value ><br>threshold=0.5988894104957581   |
| node_24:<br>feature_name=cg00631702 | feature_id[943].value <=<br>threshold=0.37470583617687225  |
| node_25:<br>feature_name=cg07912144 | feature_id[3075].value ><br>threshold=0.5578519105911255   |
| node_29:<br>feature_name=cg24407065 | feature_id[388].value ><br>threshold=0.5364363789558411    |
| node_33:<br>feature_name=cg15275017 | feature_id[5069].value ><br>threshold=0.4538573920726776   |
| node_51:<br>feature_name=cg07281938 | feature_id[351].value ><br>threshold=0.7506992518901825    |
| node_73:<br>feature_name=cg17524821 | feature_id[5626].value ><br>threshold=0.4504699558019638   |
| node_75:<br>feature_name=cg02973735 | feature_id[1677].value ><br>threshold=0.29383400082588196  |
| node_77:<br>feature_name=cg23345038 | feature_id[7002].value ><br>threshold=0.6255057156085968   |
| node_79:<br>feature_name=cg17537493 | feature_id[5630].value ><br>threshold=0.5825372636318207   |
| node_85:<br>feature_name=cg12948116 | feature_id[4375].value <=<br>threshold=0.5658791363239288  |
| node_86:<br>feature_name=cg06038180 | feature_id[2529].value <=<br>threshold=0.43877437710762024 |
| Class: schwannoma (SWN)             |                                                            |
|                                     |                                                            |
| Rules_16                            | passed counts:29                                           |
| node_0:<br>feature_name=cg11915444  | feature_id[4116].value ><br>threshold=0.3402601182460785   |
| node_10:<br>feature_name=cg12109728 | feature_id[4182].value ><br>threshold=0.7068270146846771   |
| node_20:<br>feature_name=cg10844382 | feature_id[3856].value ><br>threshold=0.5988894104957581   |
| node_24:<br>feature_name=cg00631702 | feature_id[943].value <=<br>threshold=0.37470583617687225  |
| node_25:<br>feature_name=cg07912144 | feature_id[3075].value ><br>threshold=0.5578519105911255   |
| node_29:<br>feature_name=cg24407065 | feature_id[388].value ><br>threshold=0.5364363789558411    |
| node_33:<br>feature_name=cg15275017 | feature_id[5069].value ><br>threshold=0.4538573920726776   |
| node_51:<br>feature_name=cg07281938 | feature_id[351].value ><br>threshold=0.7506992518901825    |

|                                                                                   |                                                            |
|-----------------------------------------------------------------------------------|------------------------------------------------------------|
| node_73:<br>feature_name=cg17524821                                               | feature_id[5626].value ><br>threshold=0.4504699558019638   |
| node_75:<br>feature_name=cg02973735                                               | feature_id[1677].value ><br>threshold=0.29383400082588196  |
| node_77:<br>feature_name=cg23345038                                               | feature_id[7002].value ><br>threshold=0.6255057156085968   |
| node_79:<br>feature_name=cg17537493                                               | feature_id[5630].value ><br>threshold=0.5825372636318207   |
| node_85:<br>feature_name=cg12948116                                               | feature_id[4375].value <=<br>threshold=0.5658791363239288  |
| node_86:<br>feature_name=cg06038180                                               | feature_id[2529].value ><br>threshold=0.43877437710762024  |
| node_88:<br>feature_name=cg15720017                                               | feature_id[5175].value ><br>threshold=0.7009969055652618   |
| node_90:<br>feature_name=cg13070215                                               | feature_id[314].value <=<br>threshold=0.14645694941282272  |
| node_91:<br>feature_name=cg01014262                                               | feature_id[1082].value <=<br>threshold=0.5737917125225067  |
| node_92:<br>feature_name=cg16863382                                               | feature_id[5471].value ><br>threshold=0.7200668156147003   |
| node_102:<br>feature_name=cg06633739                                              | feature_id[2686].value ><br>threshold=0.47115950286388397  |
| node_126:<br>feature_name=cg22946562                                              | feature_id[744].value ><br>threshold=0.6194809079170227    |
| node_170:<br>feature_name=cg12120430                                              | feature_id[4185].value ><br>threshold=0.5775820016860962   |
| node_172:<br>feature_name=cg02137970                                              | feature_id[1411].value <=<br>threshold=0.6705857813358307  |
| node_173:<br>feature_name=cg16185457                                              | feature_id[5282].value ><br>threshold=0.5055856853723526   |
| node_183:<br>feature_name=cg04993279                                              | feature_id[2243].value <=<br>threshold=0.46021124720573425 |
| node_184:<br>feature_name=cg04655520                                              | feature_id[2141].value ><br>threshold=0.08191334456205368  |
| Class: well differentiated liposarcoma (WDLs)/dedifferentiated liposarcoma (DDLs) |                                                            |
|                                                                                   |                                                            |
| Rules_17                                                                          | passed counts:28                                           |
| node_0:<br>feature_name=cg11915444                                                | feature_id[4116].value ><br>threshold=0.3402601182460785   |
| node_10:<br>feature_name=cg12109728                                               | feature_id[4182].value ><br>threshold=0.7068270146846771   |
| node_20:<br>feature_name=cg10844382                                               | feature_id[3856].value ><br>threshold=0.5988894104957581   |

|                                      |                                                           |
|--------------------------------------|-----------------------------------------------------------|
| node_24:<br>feature_name=cg00631702  | feature_id[943].value <=<br>threshold=0.37470583617687225 |
| node_25:<br>feature_name=cg07912144  | feature_id[3075].value ><br>threshold=0.5578519105911255  |
| node_29:<br>feature_name=cg24407065  | feature_id[388].value ><br>threshold=0.5364363789558411   |
| node_33:<br>feature_name=cg15275017  | feature_id[5069].value ><br>threshold=0.4538573920726776  |
| node_51:<br>feature_name=cg07281938  | feature_id[351].value ><br>threshold=0.7506992518901825   |
| node_73:<br>feature_name=cg17524821  | feature_id[5626].value ><br>threshold=0.4504699558019638  |
| node_75:<br>feature_name=cg02973735  | feature_id[1677].value ><br>threshold=0.29383400082588196 |
| node_77:<br>feature_name=cg23345038  | feature_id[7002].value ><br>threshold=0.6255057156085968  |
| node_79:<br>feature_name=cg17537493  | feature_id[5630].value ><br>threshold=0.5825372636318207  |
| node_85:<br>feature_name=cg12948116  | feature_id[4375].value <=<br>threshold=0.5658791363239288 |
| node_86:<br>feature_name=cg06038180  | feature_id[2529].value ><br>threshold=0.43877437710762024 |
| node_88:<br>feature_name=cg15720017  | feature_id[5175].value ><br>threshold=0.7009969055652618  |
| node_90:<br>feature_name=cg13070215  | feature_id[314].value ><br>threshold=0.14645694941282272  |
| node_340:<br>feature_name=cg06272543 | feature_id[2590].value ><br>threshold=0.07370422407984734 |
| Class: epithelioid sarcoma (ES)      |                                                           |
|                                      |                                                           |
| Rules_18                             | passed counts:26                                          |
| node_0:<br>feature_name=cg11915444   | feature_id[4116].value ><br>threshold=0.3402601182460785  |
| node_10:<br>feature_name=cg12109728  | feature_id[4182].value ><br>threshold=0.7068270146846771  |
| node_20:<br>feature_name=cg10844382  | feature_id[3856].value ><br>threshold=0.5988894104957581  |
| node_24:<br>feature_name=cg00631702  | feature_id[943].value <=<br>threshold=0.37470583617687225 |
| node_25:<br>feature_name=cg07912144  | feature_id[3075].value ><br>threshold=0.5578519105911255  |
| node_29:<br>feature_name=cg24407065  | feature_id[388].value ><br>threshold=0.5364363789558411   |

|                                                         |                                                            |
|---------------------------------------------------------|------------------------------------------------------------|
| node_33:<br>feature_name=cg15275017                     | feature_id[5069].value ><br>threshold=0.4538573920726776   |
| node_51:<br>feature_name=cg07281938                     | feature_id[351].value ><br>threshold=0.7506992518901825    |
| node_73:<br>feature_name=cg17524821                     | feature_id[5626].value ><br>threshold=0.4504699558019638   |
| node_75:<br>feature_name=cg02973735                     | feature_id[1677].value ><br>threshold=0.29383400082588196  |
| node_77:<br>feature_name=cg23345038                     | feature_id[7002].value ><br>threshold=0.6255057156085968   |
| node_79:<br>feature_name=cg17537493                     | feature_id[5630].value ><br>threshold=0.5825372636318207   |
| node_85:<br>feature_name=cg12948116                     | feature_id[4375].value <=<br>threshold=0.5658791363239288  |
| node_86:<br>feature_name=cg06038180                     | feature_id[2529].value ><br>threshold=0.43877437710762024  |
| node_88:<br>feature_name=cg15720017                     | feature_id[5175].value ><br>threshold=0.7009969055652618   |
| node_90:<br>feature_name=cg13070215                     | feature_id[314].value <=<br>threshold=0.14645694941282272  |
| node_91:<br>feature_name=cg01014262                     | feature_id[1082].value <=<br>threshold=0.5737917125225067  |
| node_92:<br>feature_name=cg16863382                     | feature_id[5471].value ><br>threshold=0.7200668156147003   |
| node_102:<br>feature_name=cg06633739                    | feature_id[2686].value <=<br>threshold=0.47115950286388397 |
| node_103:<br>feature_name=cg03861097                    | feature_id[1943].value ><br>threshold=0.24196631461381912  |
| node_123:<br>feature_name=cg11468635                    | feature_id[181].value <=<br>threshold=0.9009453654289246   |
| Class: malignant peripheral nerve sheath tumour (MPNST) |                                                            |
|                                                         |                                                            |
| Rules_19                                                | passed counts:23                                           |
| node_0:<br>feature_name=cg11915444                      | feature_id[4116].value ><br>threshold=0.3402601182460785   |
| node_10:<br>feature_name=cg12109728                     | feature_id[4182].value ><br>threshold=0.7068270146846771   |
| node_20:<br>feature_name=cg10844382                     | feature_id[3856].value ><br>threshold=0.5988894104957581   |
| node_24:<br>feature_name=cg00631702                     | feature_id[943].value <=<br>threshold=0.37470583617687225  |
| node_25:<br>feature_name=cg07912144                     | feature_id[3075].value ><br>threshold=0.5578519105911255   |

|                                          |                                                           |
|------------------------------------------|-----------------------------------------------------------|
| node_29:<br>feature_name=cg24407065      | feature_id[388].value ><br>threshold=0.5364363789558411   |
| node_33:<br>feature_name=cg15275017      | feature_id[5069].value ><br>threshold=0.4538573920726776  |
| node_51:<br>feature_name=cg07281938      | feature_id[351].value ><br>threshold=0.7506992518901825   |
| node_73:<br>feature_name=cg17524821      | feature_id[5626].value ><br>threshold=0.4504699558019638  |
| node_75:<br>feature_name=cg02973735      | feature_id[1677].value ><br>threshold=0.29383400082588196 |
| node_77:<br>feature_name=cg23345038      | feature_id[7002].value ><br>threshold=0.6255057156085968  |
| node_79:<br>feature_name=cg17537493      | feature_id[5630].value ><br>threshold=0.5825372636318207  |
| node_85:<br>feature_name=cg12948116      | feature_id[4375].value <=<br>threshold=0.5658791363239288 |
| node_86:<br>feature_name=cg06038180      | feature_id[2529].value ><br>threshold=0.43877437710762024 |
| node_88:<br>feature_name=cg15720017      | feature_id[5175].value ><br>threshold=0.7009969055652618  |
| node_90:<br>feature_name=cg13070215      | feature_id[314].value <=<br>threshold=0.14645694941282272 |
| node_91:<br>feature_name=cg01014262      | feature_id[1082].value <=<br>threshold=0.5737917125225067 |
| node_92:<br>feature_name=cg16863382      | feature_id[5471].value <=<br>threshold=0.7200668156147003 |
| node_93:<br>feature_name=cg18601229      | feature_id[5883].value ><br>threshold=0.7762220203876495  |
| Class: alveolar soft part sarcoma (ASPS) |                                                           |
|                                          |                                                           |
| Rules_20                                 | passed counts:22                                          |
| node_0:<br>feature_name=cg11915444       | feature_id[4116].value ><br>threshold=0.3402601182460785  |
| node_10:<br>feature_name=cg12109728      | feature_id[4182].value ><br>threshold=0.7068270146846771  |
| node_20:<br>feature_name=cg10844382      | feature_id[3856].value ><br>threshold=0.5988894104957581  |
| node_24:<br>feature_name=cg00631702      | feature_id[943].value <=<br>threshold=0.37470583617687225 |
| node_25:<br>feature_name=cg07912144      | feature_id[3075].value ><br>threshold=0.5578519105911255  |
| node_29:<br>feature_name=cg24407065      | feature_id[388].value ><br>threshold=0.5364363789558411   |

|                                             |                                                           |
|---------------------------------------------|-----------------------------------------------------------|
| node_33:<br>feature_name=cg15275017         | feature_id[5069].value ><br>threshold=0.4538573920726776  |
| node_51:<br>feature_name=cg07281938         | feature_id[351].value ><br>threshold=0.7506992518901825   |
| node_73:<br>feature_name=cg17524821         | feature_id[5626].value ><br>threshold=0.4504699558019638  |
| node_75:<br>feature_name=cg02973735         | feature_id[1677].value ><br>threshold=0.29383400082588196 |
| node_77:<br>feature_name=cg23345038         | feature_id[7002].value ><br>threshold=0.6255057156085968  |
| node_79:<br>feature_name=cg17537493         | feature_id[5630].value ><br>threshold=0.5825372636318207  |
| node_85:<br>feature_name=cg12948116         | feature_id[4375].value <=<br>threshold=0.5658791363239288 |
| node_86:<br>feature_name=cg06038180         | feature_id[2529].value ><br>threshold=0.43877437710762024 |
| node_88:<br>feature_name=cg15720017         | feature_id[5175].value ><br>threshold=0.7009969055652618  |
| node_90:<br>feature_name=cg13070215         | feature_id[314].value <=<br>threshold=0.14645694941282272 |
| node_91:<br>feature_name=cg01014262         | feature_id[1082].value <=<br>threshold=0.5737917125225067 |
| node_92:<br>feature_name=cg16863382         | feature_id[5471].value ><br>threshold=0.7200668156147003  |
| node_102:<br>feature_name=cg06633739        | feature_id[2686].value ><br>threshold=0.47115950286388397 |
| node_126:<br>feature_name=cg22946562        | feature_id[744].value ><br>threshold=0.6194809079170227   |
| node_170:<br>feature_name=cg12120430        | feature_id[4185].value ><br>threshold=0.5775820016860962  |
| node_172:<br>feature_name=cg02137970        | feature_id[1411].value ><br>threshold=0.6705857813358307  |
| node_196:<br>feature_name=cg03393445        | feature_id[1807].value <=<br>threshold=0.4260125905275345 |
| node_197:<br>feature_name=cg01297744        | feature_id[1157].value ><br>threshold=0.8005762100219727  |
| node_211:<br>feature_name=cg14401746        | feature_id[4834].value <=<br>threshold=0.3708716481924057 |
| Class: small blue round cell tumour (SBRCT) |                                                           |
|                                             |                                                           |
| Rules_21                                    | passed counts:21                                          |
| node_0:<br>feature_name=cg11915444          | feature_id[4116].value ><br>threshold=0.3402601182460785  |

|                                        |                                                           |
|----------------------------------------|-----------------------------------------------------------|
| node_10:<br>feature_name=cg12109728    | feature_id[4182].value ><br>threshold=0.7068270146846771  |
| node_20:<br>feature_name=cg10844382    | feature_id[3856].value ><br>threshold=0.5988894104957581  |
| node_24:<br>feature_name=cg00631702    | feature_id[943].value <=<br>threshold=0.37470583617687225 |
| node_25:<br>feature_name=cg07912144    | feature_id[3075].value ><br>threshold=0.5578519105911255  |
| node_29:<br>feature_name=cg24407065    | feature_id[388].value ><br>threshold=0.5364363789558411   |
| node_33:<br>feature_name=cg15275017    | feature_id[5069].value ><br>threshold=0.4538573920726776  |
| node_51:<br>feature_name=cg07281938    | feature_id[351].value ><br>threshold=0.7506992518901825   |
| node_73:<br>feature_name=cg17524821    | feature_id[5626].value ><br>threshold=0.4504699558019638  |
| node_75:<br>feature_name=cg02973735    | feature_id[1677].value ><br>threshold=0.29383400082588196 |
| node_77:<br>feature_name=cg23345038    | feature_id[7002].value ><br>threshold=0.6255057156085968  |
| node_79:<br>feature_name=cg17537493    | feature_id[5630].value ><br>threshold=0.5825372636318207  |
| node_85:<br>feature_name=cg12948116    | feature_id[4375].value <=<br>threshold=0.5658791363239288 |
| node_86:<br>feature_name=cg06038180    | feature_id[2529].value ><br>threshold=0.43877437710762024 |
| node_88:<br>feature_name=cg15720017    | feature_id[5175].value ><br>threshold=0.7009969055652618  |
| node_90:<br>feature_name=cg13070215    | feature_id[314].value <=<br>threshold=0.14645694941282272 |
| node_91:<br>feature_name=cg01014262    | feature_id[1082].value ><br>threshold=0.5737917125225067  |
| node_337:<br>feature_name=cg19909613   | feature_id[6202].value ><br>threshold=0.8301863670349121  |
| Class: malignant rhabdoid tumour (MRT) |                                                           |
|                                        |                                                           |
| Rules_22                               | passed counts:14                                          |
| node_0:<br>feature_name=cg11915444     | feature_id[4116].value ><br>threshold=0.3402601182460785  |
| node_10:<br>feature_name=cg12109728    | feature_id[4182].value ><br>threshold=0.7068270146846771  |
| node_20:<br>feature_name=cg10844382    | feature_id[3856].value ><br>threshold=0.5988894104957581  |

|                                                  |                                                           |
|--------------------------------------------------|-----------------------------------------------------------|
| node_24:<br>feature_name=cg00631702              | feature_id[943].value <=<br>threshold=0.37470583617687225 |
| node_25:<br>feature_name=cg07912144              | feature_id[3075].value ><br>threshold=0.5578519105911255  |
| node_29:<br>feature_name=cg24407065              | feature_id[388].value ><br>threshold=0.5364363789558411   |
| node_33:<br>feature_name=cg15275017              | feature_id[5069].value ><br>threshold=0.4538573920726776  |
| node_51:<br>feature_name=cg07281938              | feature_id[351].value ><br>threshold=0.7506992518901825   |
| node_73:<br>feature_name=cg17524821              | feature_id[5626].value ><br>threshold=0.4504699558019638  |
| node_75:<br>feature_name=cg02973735              | feature_id[1677].value ><br>threshold=0.29383400082588196 |
| node_77:<br>feature_name=cg23345038              | feature_id[7002].value ><br>threshold=0.6255057156085968  |
| node_79:<br>feature_name=cg17537493              | feature_id[5630].value ><br>threshold=0.5825372636318207  |
| node_85:<br>feature_name=cg12948116              | feature_id[4375].value <=<br>threshold=0.5658791363239288 |
| node_86:<br>feature_name=cg06038180              | feature_id[2529].value ><br>threshold=0.43877437710762024 |
| node_88:<br>feature_name=cg15720017              | feature_id[5175].value ><br>threshold=0.7009969055652618  |
| node_90:<br>feature_name=cg13070215              | feature_id[314].value <=<br>threshold=0.14645694941282272 |
| node_91:<br>feature_name=cg01014262              | feature_id[1082].value <=<br>threshold=0.5737917125225067 |
| node_92:<br>feature_name=cg16863382              | feature_id[5471].value ><br>threshold=0.7200668156147003  |
| node_102:<br>feature_name=cg06633739             | feature_id[2686].value ><br>threshold=0.47115950286388397 |
| node_126:<br>feature_name=cg22946562             | feature_id[744].value ><br>threshold=0.6194809079170227   |
| node_170:<br>feature_name=cg12120430             | feature_id[4185].value <=<br>threshold=0.5775820016860962 |
| Class: angioleiomyoma (ALMO)/myopericytoma (MPC) |                                                           |
|                                                  |                                                           |
| Rules_23                                         | passed counts:13                                          |
| node_0:<br>feature_name=cg11915444               | feature_id[4116].value ><br>threshold=0.3402601182460785  |
| node_10:<br>feature_name=cg12109728              | feature_id[4182].value ><br>threshold=0.7068270146846771  |



|                                      |                                                           |
|--------------------------------------|-----------------------------------------------------------|
| node_20:<br>feature_name=cg10844382  | feature_id[3856].value ><br>threshold=0.5988894104957581  |
| node_24:<br>feature_name=cg00631702  | feature_id[943].value <=<br>threshold=0.37470583617687225 |
| node_25:<br>feature_name=cg07912144  | feature_id[3075].value ><br>threshold=0.5578519105911255  |
| node_29:<br>feature_name=cg24407065  | feature_id[388].value ><br>threshold=0.5364363789558411   |
| node_33:<br>feature_name=cg15275017  | feature_id[5069].value ><br>threshold=0.4538573920726776  |
| node_51:<br>feature_name=cg07281938  | feature_id[351].value ><br>threshold=0.7506992518901825   |
| node_73:<br>feature_name=cg17524821  | feature_id[5626].value ><br>threshold=0.4504699558019638  |
| node_75:<br>feature_name=cg02973735  | feature_id[1677].value ><br>threshold=0.29383400082588196 |
| node_77:<br>feature_name=cg23345038  | feature_id[7002].value ><br>threshold=0.6255057156085968  |
| node_79:<br>feature_name=cg17537493  | feature_id[5630].value ><br>threshold=0.5825372636318207  |
| node_85:<br>feature_name=cg12948116  | feature_id[4375].value <=<br>threshold=0.5658791363239288 |
| node_86:<br>feature_name=cg06038180  | feature_id[2529].value ><br>threshold=0.43877437710762024 |
| node_88:<br>feature_name=cg15720017  | feature_id[5175].value ><br>threshold=0.7009969055652618  |
| node_90:<br>feature_name=cg13070215  | feature_id[314].value <=<br>threshold=0.14645694941282272 |
| node_91:<br>feature_name=cg01014262  | feature_id[1082].value <=<br>threshold=0.5737917125225067 |
| node_92:<br>feature_name=cg16863382  | feature_id[5471].value ><br>threshold=0.7200668156147003  |
| node_102:<br>feature_name=cg06633739 | feature_id[2686].value ><br>threshold=0.47115950286388397 |
| node_126:<br>feature_name=cg22946562 | feature_id[744].value ><br>threshold=0.6194809079170227   |
| node_170:<br>feature_name=cg12120430 | feature_id[4185].value ><br>threshold=0.5775820016860962  |
| node_172:<br>feature_name=cg02137970 | feature_id[1411].value ><br>threshold=0.6705857813358307  |
| node_196:<br>feature_name=cg03393445 | feature_id[1807].value ><br>threshold=0.4260125905275345  |
| node_218:<br>feature_name=cg23525541 | feature_id[7049].value <=<br>threshold=0.4485483318567276 |

|                                      |                                                           |
|--------------------------------------|-----------------------------------------------------------|
| node_219:<br>feature_name=cg24964215 | feature_id[7404].value ><br>threshold=0.04320882819592953 |
| Class: fibrous dysplasia (FDY)       |                                                           |
|                                      |                                                           |
| Rules_24                             | passed counts:13                                          |
| node_0:<br>feature_name=cg11915444   | feature_id[4116].value ><br>threshold=0.3402601182460785  |
| node_10:<br>feature_name=cg12109728  | feature_id[4182].value ><br>threshold=0.7068270146846771  |
| node_20:<br>feature_name=cg10844382  | feature_id[3856].value ><br>threshold=0.5988894104957581  |
| node_24:<br>feature_name=cg00631702  | feature_id[943].value <=<br>threshold=0.37470583617687225 |
| node_25:<br>feature_name=cg07912144  | feature_id[3075].value ><br>threshold=0.5578519105911255  |
| node_29:<br>feature_name=cg24407065  | feature_id[388].value ><br>threshold=0.5364363789558411   |
| node_33:<br>feature_name=cg15275017  | feature_id[5069].value ><br>threshold=0.4538573920726776  |
| node_51:<br>feature_name=cg07281938  | feature_id[351].value ><br>threshold=0.7506992518901825   |
| node_73:<br>feature_name=cg17524821  | feature_id[5626].value ><br>threshold=0.4504699558019638  |
| node_75:<br>feature_name=cg02973735  | feature_id[1677].value ><br>threshold=0.29383400082588196 |
| node_77:<br>feature_name=cg23345038  | feature_id[7002].value ><br>threshold=0.6255057156085968  |
| node_79:<br>feature_name=cg17537493  | feature_id[5630].value ><br>threshold=0.5825372636318207  |
| node_85:<br>feature_name=cg12948116  | feature_id[4375].value <=<br>threshold=0.5658791363239288 |
| node_86:<br>feature_name=cg06038180  | feature_id[2529].value ><br>threshold=0.43877437710762024 |
| node_88:<br>feature_name=cg15720017  | feature_id[5175].value ><br>threshold=0.7009969055652618  |
| node_90:<br>feature_name=cg13070215  | feature_id[314].value <=<br>threshold=0.14645694941282272 |
| node_91:<br>feature_name=cg01014262  | feature_id[1082].value <=<br>threshold=0.5737917125225067 |
| node_92:<br>feature_name=cg16863382  | feature_id[5471].value ><br>threshold=0.7200668156147003  |
| node_102:<br>feature_name=cg06633739 | feature_id[2686].value ><br>threshold=0.47115950286388397 |

|                                         |                                                           |
|-----------------------------------------|-----------------------------------------------------------|
| node_126:<br>feature_name=cg22946562    | feature_id[744].value ><br>threshold=0.6194809079170227   |
| node_170:<br>feature_name=cg12120430    | feature_id[4185].value ><br>threshold=0.5775820016860962  |
| node_172:<br>feature_name=cg02137970    | feature_id[1411].value <=<br>threshold=0.6705857813358307 |
| node_173:<br>feature_name=cg16185457    | feature_id[5282].value <=<br>threshold=0.5055856853723526 |
| node_174:<br>feature_name=cg09040552    | feature_id[3370].value <=<br>threshold=0.596051037311554  |
| Class: desmoid-type fibromatosis (DTFM) |                                                           |
|                                         |                                                           |
| Rules_25                                | passed counts:12                                          |
| node_0:<br>feature_name=cg11915444      | feature_id[4116].value ><br>threshold=0.3402601182460785  |
| node_10:<br>feature_name=cg12109728     | feature_id[4182].value ><br>threshold=0.7068270146846771  |
| node_20:<br>feature_name=cg10844382     | feature_id[3856].value ><br>threshold=0.5988894104957581  |
| node_24:<br>feature_name=cg00631702     | feature_id[943].value <=<br>threshold=0.37470583617687225 |
| node_25:<br>feature_name=cg07912144     | feature_id[3075].value ><br>threshold=0.5578519105911255  |
| node_29:<br>feature_name=cg24407065     | feature_id[388].value ><br>threshold=0.5364363789558411   |
| node_33:<br>feature_name=cg15275017     | feature_id[5069].value ><br>threshold=0.4538573920726776  |
| node_51:<br>feature_name=cg07281938     | feature_id[351].value ><br>threshold=0.7506992518901825   |
| node_73:<br>feature_name=cg17524821     | feature_id[5626].value ><br>threshold=0.4504699558019638  |
| node_75:<br>feature_name=cg02973735     | feature_id[1677].value ><br>threshold=0.29383400082588196 |
| node_77:<br>feature_name=cg23345038     | feature_id[7002].value ><br>threshold=0.6255057156085968  |
| node_79:<br>feature_name=cg17537493     | feature_id[5630].value ><br>threshold=0.5825372636318207  |
| node_85:<br>feature_name=cg12948116     | feature_id[4375].value <=<br>threshold=0.5658791363239288 |
| node_86:<br>feature_name=cg06038180     | feature_id[2529].value ><br>threshold=0.43877437710762024 |
| node_88:<br>feature_name=cg15720017     | feature_id[5175].value ><br>threshold=0.7009969055652618  |

|                                                  |                                                           |
|--------------------------------------------------|-----------------------------------------------------------|
| node_90:<br>feature_name=cg13070215              | feature_id[314].value <=<br>threshold=0.14645694941282272 |
| node_91:<br>feature_name=cg01014262              | feature_id[1082].value <=<br>threshold=0.5737917125225067 |
| node_92:<br>feature_name=cg16863382              | feature_id[5471].value ><br>threshold=0.7200668156147003  |
| node_102:<br>feature_name=cg06633739             | feature_id[2686].value ><br>threshold=0.47115950286388397 |
| node_126:<br>feature_name=cg22946562             | feature_id[744].value ><br>threshold=0.6194809079170227   |
| node_170:<br>feature_name=cg12120430             | feature_id[4185].value ><br>threshold=0.5775820016860962  |
| node_172:<br>feature_name=cg02137970             | feature_id[1411].value ><br>threshold=0.6705857813358307  |
| node_196:<br>feature_name=cg03393445             | feature_id[1807].value ><br>threshold=0.4260125905275345  |
| node_218:<br>feature_name=cg23525541             | feature_id[7049].value ><br>threshold=0.4485483318567276  |
| node_222:<br>feature_name=cg10543634             | feature_id[3775].value ><br>threshold=0.29505227506160736 |
| node_224:<br>feature_name=cg07344990             | feature_id[2926].value ><br>threshold=0.5750180780887604  |
| node_226:<br>feature_name=cg10558233             | feature_id[3780].value <=<br>threshold=0.7217690348625183 |
| node_227:<br>feature_name=cg08097359             | feature_id[3116].value ><br>threshold=0.3598180413246155  |
| node_229:<br>feature_name=cg22737001             | feature_id[6843].value <=<br>threshold=0.46281898021698   |
| node_230:<br>feature_name=cg24276624             | feature_id[7242].value ><br>threshold=0.6169979274272919  |
| node_232:<br>feature_name=cg04026354             | feature_id[1982].value ><br>threshold=0.42332448065280914 |
| node_316:<br>feature_name=cg23693485             | feature_id[7083].value <=<br>threshold=0.7056963741779327 |
| node_317:<br>feature_name=cg14583686             | feature_id[4895].value ><br>threshold=0.70423823595047    |
| Class: inflammatory myofibroblastic tumour (IMT) |                                                           |
|                                                  |                                                           |
| Rules_26                                         | passed counts:12                                          |
| node_0:<br>feature_name=cg11915444               | feature_id[4116].value ><br>threshold=0.3402601182460785  |
| node_10:<br>feature_name=cg12109728              | feature_id[4182].value ><br>threshold=0.7068270146846771  |

|                                      |                                                           |
|--------------------------------------|-----------------------------------------------------------|
| node_20:<br>feature_name=cg10844382  | feature_id[3856].value ><br>threshold=0.5988894104957581  |
| node_24:<br>feature_name=cg00631702  | feature_id[943].value <=<br>threshold=0.37470583617687225 |
| node_25:<br>feature_name=cg07912144  | feature_id[3075].value ><br>threshold=0.5578519105911255  |
| node_29:<br>feature_name=cg24407065  | feature_id[388].value ><br>threshold=0.5364363789558411   |
| node_33:<br>feature_name=cg15275017  | feature_id[5069].value ><br>threshold=0.4538573920726776  |
| node_51:<br>feature_name=cg07281938  | feature_id[351].value ><br>threshold=0.7506992518901825   |
| node_73:<br>feature_name=cg17524821  | feature_id[5626].value ><br>threshold=0.4504699558019638  |
| node_75:<br>feature_name=cg02973735  | feature_id[1677].value ><br>threshold=0.29383400082588196 |
| node_77:<br>feature_name=cg23345038  | feature_id[7002].value ><br>threshold=0.6255057156085968  |
| node_79:<br>feature_name=cg17537493  | feature_id[5630].value ><br>threshold=0.5825372636318207  |
| node_85:<br>feature_name=cg12948116  | feature_id[4375].value <=<br>threshold=0.5658791363239288 |
| node_86:<br>feature_name=cg06038180  | feature_id[2529].value ><br>threshold=0.43877437710762024 |
| node_88:<br>feature_name=cg15720017  | feature_id[5175].value ><br>threshold=0.7009969055652618  |
| node_90:<br>feature_name=cg13070215  | feature_id[314].value <=<br>threshold=0.14645694941282272 |
| node_91:<br>feature_name=cg01014262  | feature_id[1082].value <=<br>threshold=0.5737917125225067 |
| node_92:<br>feature_name=cg16863382  | feature_id[5471].value ><br>threshold=0.7200668156147003  |
| node_102:<br>feature_name=cg06633739 | feature_id[2686].value ><br>threshold=0.47115950286388397 |
| node_126:<br>feature_name=cg22946562 | feature_id[744].value ><br>threshold=0.6194809079170227   |
| node_170:<br>feature_name=cg12120430 | feature_id[4185].value ><br>threshold=0.5775820016860962  |
| node_172:<br>feature_name=cg02137970 | feature_id[1411].value ><br>threshold=0.6705857813358307  |
| node_196:<br>feature_name=cg03393445 | feature_id[1807].value ><br>threshold=0.4260125905275345  |
| node_218:<br>feature_name=cg23525541 | feature_id[7049].value ><br>threshold=0.4485483318567276  |

|                                            |                                                            |
|--------------------------------------------|------------------------------------------------------------|
| node_22:<br>feature_name=cg10543634        | feature_id[3775].value <=<br>threshold=0.29505227506160736 |
| Class: ossifying fibromyxoid tumour (OFMT) |                                                            |
| Rules_27                                   | passed counts:12                                           |
| node_0:<br>feature_name=cg11915444         | feature_id[4116].value ><br>threshold=0.3402601182460785   |
| node_10:<br>feature_name=cg12109728        | feature_id[4182].value ><br>threshold=0.7068270146846771   |
| node_20:<br>feature_name=cg10844382        | feature_id[3856].value ><br>threshold=0.5988894104957581   |
| node_24:<br>feature_name=cg00631702        | feature_id[943].value <=<br>threshold=0.37470583617687225  |
| node_25:<br>feature_name=cg07912144        | feature_id[3075].value ><br>threshold=0.5578519105911255   |
| node_29:<br>feature_name=cg24407065        | feature_id[388].value ><br>threshold=0.5364363789558411    |
| node_33:<br>feature_name=cg15275017        | feature_id[5069].value ><br>threshold=0.4538573920726776   |
| node_51:<br>feature_name=cg07281938        | feature_id[351].value ><br>threshold=0.7506992518901825    |
| node_73:<br>feature_name=cg17524821        | feature_id[5626].value ><br>threshold=0.4504699558019638   |
| node_75:<br>feature_name=cg02973735        | feature_id[1677].value ><br>threshold=0.29383400082588196  |
| node_77:<br>feature_name=cg23345038        | feature_id[7002].value ><br>threshold=0.6255057156085968   |
| node_79:<br>feature_name=cg17537493        | feature_id[5630].value ><br>threshold=0.5825372636318207   |
| node_85:<br>feature_name=cg12948116        | feature_id[4375].value <=<br>threshold=0.5658791363239288  |
| node_86:<br>feature_name=cg06038180        | feature_id[2529].value ><br>threshold=0.43877437710762024  |
| node_88:<br>feature_name=cg15720017        | feature_id[5175].value ><br>threshold=0.7009969055652618   |
| node_90:<br>feature_name=cg13070215        | feature_id[314].value <=<br>threshold=0.14645694941282272  |
| node_91:<br>feature_name=cg01014262        | feature_id[1082].value <=<br>threshold=0.5737917125225067  |
| node_92:<br>feature_name=cg16863382        | feature_id[5471].value ><br>threshold=0.7200668156147003   |
| node_102:<br>feature_name=cg06633739       | feature_id[2686].value ><br>threshold=0.47115950286388397  |

|                                                |                                                           |
|------------------------------------------------|-----------------------------------------------------------|
| node_126:<br>feature_name=cg22946562           | feature_id[744].value ><br>threshold=0.6194809079170227   |
| node_170:<br>feature_name=cg12120430           | feature_id[4185].value ><br>threshold=0.5775820016860962  |
| node_172:<br>feature_name=cg02137970           | feature_id[1411].value ><br>threshold=0.6705857813358307  |
| node_196:<br>feature_name=cg03393445           | feature_id[1807].value <=<br>threshold=0.4260125905275345 |
| node_197:<br>feature_name=cg01297744           | feature_id[1157].value <=<br>threshold=0.8005762100219727 |
| node_198:<br>feature_name=cg08831077           | feature_id[3310].value ><br>threshold=0.4210805594921112  |
| Class: clear cell sarcoma of the kidney (CCSK) |                                                           |
|                                                |                                                           |
| Rules_28                                       | passed counts:11                                          |
| node_0:<br>feature_name=cg11915444             | feature_id[4116].value ><br>threshold=0.3402601182460785  |
| node_10:<br>feature_name=cg12109728            | feature_id[4182].value ><br>threshold=0.7068270146846771  |
| node_20:<br>feature_name=cg10844382            | feature_id[3856].value ><br>threshold=0.5988894104957581  |
| node_24:<br>feature_name=cg00631702            | feature_id[943].value <=<br>threshold=0.37470583617687225 |
| node_25:<br>feature_name=cg07912144            | feature_id[3075].value ><br>threshold=0.5578519105911255  |
| node_29:<br>feature_name=cg24407065            | feature_id[388].value ><br>threshold=0.5364363789558411   |
| node_33:<br>feature_name=cg15275017            | feature_id[5069].value ><br>threshold=0.4538573920726776  |
| node_51:<br>feature_name=cg07281938            | feature_id[351].value ><br>threshold=0.7506992518901825   |
| node_73:<br>feature_name=cg17524821            | feature_id[5626].value ><br>threshold=0.4504699558019638  |
| node_75:<br>feature_name=cg02973735            | feature_id[1677].value ><br>threshold=0.29383400082588196 |
| node_77:<br>feature_name=cg23345038            | feature_id[7002].value ><br>threshold=0.6255057156085968  |
| node_79:<br>feature_name=cg17537493            | feature_id[5630].value ><br>threshold=0.5825372636318207  |
| node_85:<br>feature_name=cg12948116            | feature_id[4375].value <=<br>threshold=0.5658791363239288 |
| node_86:<br>feature_name=cg06038180            | feature_id[2529].value ><br>threshold=0.43877437710762024 |

|                                               |                                                            |
|-----------------------------------------------|------------------------------------------------------------|
| node_88:<br>feature_name=cg15720017           | feature_id[5175].value ><br>threshold=0.7009969055652618   |
| node_90:<br>feature_name=cg13070215           | feature_id[314].value <=<br>threshold=0.14645694941282272  |
| node_91:<br>feature_name=cg01014262           | feature_id[1082].value <=<br>threshold=0.5737917125225067  |
| node_92:<br>feature_name=cg16863382           | feature_id[5471].value ><br>threshold=0.7200668156147003   |
| node_102:<br>feature_name=cg06633739          | feature_id[2686].value ><br>threshold=0.47115950286388397  |
| node_126:<br>feature_name=cg22946562          | feature_id[744].value ><br>threshold=0.6194809079170227    |
| node_170:<br>feature_name=cg12120430          | feature_id[4185].value ><br>threshold=0.5775820016860962   |
| node_172:<br>feature_name=cg02137970          | feature_id[1411].value ><br>threshold=0.6705857813358307   |
| node_196:<br>feature_name=cg03393445          | feature_id[1807].value ><br>threshold=0.4260125905275345   |
| node_218:<br>feature_name=cg23525541          | feature_id[7049].value ><br>threshold=0.4485483318567276   |
| node_222:<br>feature_name=cg10543634          | feature_id[3775].value ><br>threshold=0.29505227506160736  |
| node_224:<br>feature_name=cg07344990          | feature_id[2926].value ><br>threshold=0.5750180780887604   |
| node_226:<br>feature_name=cg10558233          | feature_id[3780].value <=<br>threshold=0.7217690348625183  |
| node_227:<br>feature_name=cg08097359          | feature_id[3116].value ><br>threshold=0.3598180413246155   |
| node_229:<br>feature_name=cg22737001          | feature_id[6843].value <=<br>threshold=0.46281898021698    |
| node_230:<br>feature_name=cg24276624          | feature_id[7242].value ><br>threshold=0.6169979274272919   |
| node_232:<br>feature_name=cg04026354          | feature_id[1982].value ><br>threshold=0.42332448065280914  |
| node_316:<br>feature_name=cg23693485          | feature_id[7083].value ><br>threshold=0.7056963741779327   |
| node_320:<br>feature_name=cg16027775          | feature_id[5238].value <=<br>threshold=0.17370137572288513 |
| Class: angiomatoid fibrous histiocytoma (AFH) |                                                            |
|                                               |                                                            |
| Rules_29                                      | passed counts:11                                           |
| node_0:<br>feature_name=cg11915444            | feature_id[4116].value ><br>threshold=0.3402601182460785   |



|                                      |                                                           |
|--------------------------------------|-----------------------------------------------------------|
| node_10:<br>feature_name=cg12109728  | feature_id[4182].value ><br>threshold=0.7068270146846771  |
| node_20:<br>feature_name=cg10844382  | feature_id[3856].value ><br>threshold=0.5988894104957581  |
| node_24:<br>feature_name=cg00631702  | feature_id[943].value <=<br>threshold=0.37470583617687225 |
| node_25:<br>feature_name=cg07912144  | feature_id[3075].value ><br>threshold=0.5578519105911255  |
| node_29:<br>feature_name=cg24407065  | feature_id[388].value ><br>threshold=0.5364363789558411   |
| node_33:<br>feature_name=cg15275017  | feature_id[5069].value ><br>threshold=0.4538573920726776  |
| node_51:<br>feature_name=cg07281938  | feature_id[351].value ><br>threshold=0.7506992518901825   |
| node_73:<br>feature_name=cg17524821  | feature_id[5626].value ><br>threshold=0.4504699558019638  |
| node_75:<br>feature_name=cg02973735  | feature_id[1677].value ><br>threshold=0.29383400082588196 |
| node_77:<br>feature_name=cg23345038  | feature_id[7002].value ><br>threshold=0.6255057156085968  |
| node_79:<br>feature_name=cg17537493  | feature_id[5630].value ><br>threshold=0.5825372636318207  |
| node_85:<br>feature_name=cg12948116  | feature_id[4375].value <=<br>threshold=0.5658791363239288 |
| node_86:<br>feature_name=cg06038180  | feature_id[2529].value ><br>threshold=0.43877437710762024 |
| node_88:<br>feature_name=cg15720017  | feature_id[5175].value ><br>threshold=0.7009969055652618  |
| node_90:<br>feature_name=cg13070215  | feature_id[314].value <=<br>threshold=0.14645694941282272 |
| node_91:<br>feature_name=cg01014262  | feature_id[1082].value <=<br>threshold=0.5737917125225067 |
| node_92:<br>feature_name=cg16863382  | feature_id[5471].value ><br>threshold=0.7200668156147003  |
| node_102:<br>feature_name=cg06633739 | feature_id[2686].value ><br>threshold=0.47115950286388397 |
| node_126:<br>feature_name=cg22946562 | feature_id[744].value ><br>threshold=0.6194809079170227   |
| node_170:<br>feature_name=cg12120430 | feature_id[4185].value ><br>threshold=0.5775820016860962  |
| node_172:<br>feature_name=cg02137970 | feature_id[1411].value ><br>threshold=0.6705857813358307  |
| node_196:<br>feature_name=cg03393445 | feature_id[1807].value ><br>threshold=0.4260125905275345  |

|                                                         |                                                           |
|---------------------------------------------------------|-----------------------------------------------------------|
| node_218:<br>feature_name=cg23525541                    | feature_id[7049].value ><br>threshold=0.4485483318567276  |
| node_222:<br>feature_name=cg10543634                    | feature_id[3775].value ><br>threshold=0.29505227506160736 |
| node_224:<br>feature_name=cg07344990                    | feature_id[2926].value <=<br>threshold=0.5750180780887604 |
| Class: low-grade endometrial stromal sarcoma (ESS (LG)) |                                                           |
|                                                         |                                                           |
| Rules_30                                                | passed counts:10                                          |
| node_0:<br>feature_name=cg11915444                      | feature_id[4116].value ><br>threshold=0.3402601182460785  |
| node_10:<br>feature_name=cg12109728                     | feature_id[4182].value ><br>threshold=0.7068270146846771  |
| node_20:<br>feature_name=cg10844382                     | feature_id[3856].value ><br>threshold=0.5988894104957581  |
| node_24:<br>feature_name=cg00631702                     | feature_id[943].value <=<br>threshold=0.37470583617687225 |
| node_25:<br>feature_name=cg07912144                     | feature_id[3075].value ><br>threshold=0.5578519105911255  |
| node_29:<br>feature_name=cg24407065                     | feature_id[388].value ><br>threshold=0.5364363789558411   |
| node_33:<br>feature_name=cg15275017                     | feature_id[5069].value ><br>threshold=0.4538573920726776  |
| node_51:<br>feature_name=cg07281938                     | feature_id[351].value ><br>threshold=0.7506992518901825   |
| node_73:<br>feature_name=cg17524821                     | feature_id[5626].value ><br>threshold=0.4504699558019638  |
| node_75:<br>feature_name=cg02973735                     | feature_id[1677].value ><br>threshold=0.29383400082588196 |
| node_77:<br>feature_name=cg23345038                     | feature_id[7002].value ><br>threshold=0.6255057156085968  |
| node_79:<br>feature_name=cg17537493                     | feature_id[5630].value ><br>threshold=0.5825372636318207  |
| node_85:<br>feature_name=cg12948116                     | feature_id[4375].value <=<br>threshold=0.5658791363239288 |
| node_86:<br>feature_name=cg06038180                     | feature_id[2529].value ><br>threshold=0.43877437710762024 |
| node_88:<br>feature_name=cg15720017                     | feature_id[5175].value ><br>threshold=0.7009969055652618  |
| node_90:<br>feature_name=cg13070215                     | feature_id[314].value <=<br>threshold=0.14645694941282272 |
| node_91:<br>feature_name=cg01014262                     | feature_id[1082].value <=<br>threshold=0.5737917125225067 |

|                                      |                                                           |
|--------------------------------------|-----------------------------------------------------------|
| node_92:<br>feature_name=cg16863382  | feature_id[5471].value ><br>threshold=0.7200668156147003  |
| node_102:<br>feature_name=cg06633739 | feature_id[2686].value ><br>threshold=0.47115950286388397 |
| node_126:<br>feature_name=cg22946562 | feature_id[744].value ><br>threshold=0.6194809079170227   |
| node_170:<br>feature_name=cg12120430 | feature_id[4185].value ><br>threshold=0.5775820016860962  |
| node_172:<br>feature_name=cg02137970 | feature_id[1411].value ><br>threshold=0.6705857813358307  |
| node_196:<br>feature_name=cg03393445 | feature_id[1807].value ><br>threshold=0.4260125905275345  |
| node_218:<br>feature_name=cg23525541 | feature_id[7049].value ><br>threshold=0.4485483318567276  |
| node_222:<br>feature_name=cg10543634 | feature_id[3775].value ><br>threshold=0.29505227506160736 |
| node_224:<br>feature_name=cg07344990 | feature_id[2926].value ><br>threshold=0.5750180780887604  |
| node_226:<br>feature_name=cg10558233 | feature_id[3780].value ><br>threshold=0.7217690348625183  |
| Class: control (CTRL)                |                                                           |
|                                      |                                                           |
| Rules_31                             | passed counts:10                                          |
| node_0:<br>feature_name=cg11915444   | feature_id[4116].value ><br>threshold=0.3402601182460785  |
| node_10:<br>feature_name=cg12109728  | feature_id[4182].value ><br>threshold=0.7068270146846771  |
| node_20:<br>feature_name=cg10844382  | feature_id[3856].value ><br>threshold=0.5988894104957581  |
| node_24:<br>feature_name=cg00631702  | feature_id[943].value <=<br>threshold=0.37470583617687225 |
| node_25:<br>feature_name=cg07912144  | feature_id[3075].value ><br>threshold=0.5578519105911255  |
| node_29:<br>feature_name=cg24407065  | feature_id[388].value ><br>threshold=0.5364363789558411   |
| node_33:<br>feature_name=cg15275017  | feature_id[5069].value ><br>threshold=0.4538573920726776  |
| node_51:<br>feature_name=cg07281938  | feature_id[351].value ><br>threshold=0.7506992518901825   |
| node_73:<br>feature_name=cg17524821  | feature_id[5626].value ><br>threshold=0.4504699558019638  |
| node_75:<br>feature_name=cg02973735  | feature_id[1677].value ><br>threshold=0.29383400082588196 |

|                                         |                                                            |
|-----------------------------------------|------------------------------------------------------------|
| node_77:<br>feature_name=cg23345038     | feature_id[7002].value ><br>threshold=0.6255057156085968   |
| node_79:<br>feature_name=cg17537493     | feature_id[5630].value ><br>threshold=0.5825372636318207   |
| node_85:<br>feature_name=cg12948116     | feature_id[4375].value <=<br>threshold=0.5658791363239288  |
| node_86:<br>feature_name=cg06038180     | feature_id[2529].value ><br>threshold=0.43877437710762024  |
| node_88:<br>feature_name=cg15720017     | feature_id[5175].value ><br>threshold=0.7009969055652618   |
| node_90:<br>feature_name=cg13070215     | feature_id[314].value <=<br>threshold=0.14645694941282272  |
| node_91:<br>feature_name=cg01014262     | feature_id[1082].value <=<br>threshold=0.5737917125225067  |
| node_92:<br>feature_name=cg16863382     | feature_id[5471].value ><br>threshold=0.7200668156147003   |
| node_102:<br>feature_name=cg06633739    | feature_id[2686].value ><br>threshold=0.47115950286388397  |
| node_126:<br>feature_name=cg22946562    | feature_id[744].value ><br>threshold=0.6194809079170227    |
| node_170:<br>feature_name=cg12120430    | feature_id[4185].value ><br>threshold=0.5775820016860962   |
| node_172:<br>feature_name=cg02137970    | feature_id[1411].value ><br>threshold=0.6705857813358307   |
| node_196:<br>feature_name=cg03393445    | feature_id[1807].value ><br>threshold=0.4260125905275345   |
| node_218:<br>feature_name=cg23525541    | feature_id[7049].value ><br>threshold=0.4485483318567276   |
| node_222:<br>feature_name=cg10543634    | feature_id[3775].value ><br>threshold=0.29505227506160736  |
| node_224:<br>feature_name=cg07344990    | feature_id[2926].value ><br>threshold=0.5750180780887604   |
| node_226:<br>feature_name=cg10558233    | feature_id[3780].value <=<br>threshold=0.7217690348625183  |
| node_227:<br>feature_name=cg08097359    | feature_id[3116].value ><br>threshold=0.3598180413246155   |
| node_229:<br>feature_name=cg22737001    | feature_id[6843].value ><br>threshold=0.46281898021698     |
| node_333:<br>feature_name=cg17775332    | feature_id[5680].value <=<br>threshold=0.38904982805252075 |
| Class: giant cell tumour of bone (GCTB) |                                                            |
|                                         |                                                            |
| Rules_32                                | passed counts:10                                           |

|                                      |                                                           |
|--------------------------------------|-----------------------------------------------------------|
| node_0:<br>feature_name=cg11915444   | feature_id[4116].value ><br>threshold=0.3402601182460785  |
| node_10:<br>feature_name=cg12109728  | feature_id[4182].value ><br>threshold=0.7068270146846771  |
| node_20:<br>feature_name=cg10844382  | feature_id[3856].value ><br>threshold=0.5988894104957581  |
| node_24:<br>feature_name=cg00631702  | feature_id[943].value <=<br>threshold=0.37470583617687225 |
| node_25:<br>feature_name=cg07912144  | feature_id[3075].value ><br>threshold=0.5578519105911255  |
| node_29:<br>feature_name=cg24407065  | feature_id[388].value ><br>threshold=0.5364363789558411   |
| node_33:<br>feature_name=cg15275017  | feature_id[5069].value ><br>threshold=0.4538573920726776  |
| node_51:<br>feature_name=cg07281938  | feature_id[351].value ><br>threshold=0.7506992518901825   |
| node_73:<br>feature_name=cg17524821  | feature_id[5626].value ><br>threshold=0.4504699558019638  |
| node_75:<br>feature_name=cg02973735  | feature_id[1677].value ><br>threshold=0.29383400082588196 |
| node_77:<br>feature_name=cg23345038  | feature_id[7002].value ><br>threshold=0.6255057156085968  |
| node_79:<br>feature_name=cg17537493  | feature_id[5630].value ><br>threshold=0.5825372636318207  |
| node_85:<br>feature_name=cg12948116  | feature_id[4375].value <=<br>threshold=0.5658791363239288 |
| node_86:<br>feature_name=cg06038180  | feature_id[2529].value ><br>threshold=0.43877437710762024 |
| node_88:<br>feature_name=cg15720017  | feature_id[5175].value ><br>threshold=0.7009969055652618  |
| node_90:<br>feature_name=cg13070215  | feature_id[314].value <=<br>threshold=0.14645694941282272 |
| node_91:<br>feature_name=cg01014262  | feature_id[1082].value <=<br>threshold=0.5737917125225067 |
| node_92:<br>feature_name=cg16863382  | feature_id[5471].value ><br>threshold=0.7200668156147003  |
| node_102:<br>feature_name=cg06633739 | feature_id[2686].value ><br>threshold=0.47115950286388397 |
| node_126:<br>feature_name=cg22946562 | feature_id[744].value ><br>threshold=0.6194809079170227   |
| node_170:<br>feature_name=cg12120430 | feature_id[4185].value ><br>threshold=0.5775820016860962  |
| node_172:<br>feature_name=cg02137970 | feature_id[1411].value ><br>threshold=0.6705857813358307  |

|                                      |                                                            |
|--------------------------------------|------------------------------------------------------------|
| node_196:<br>feature_name=cg03393445 | feature_id[1807].value ><br>threshold=0.4260125905275345   |
| node_218:<br>feature_name=cg23525541 | feature_id[7049].value ><br>threshold=0.4485483318567276   |
| node_222:<br>feature_name=cg10543634 | feature_id[3775].value ><br>threshold=0.29505227506160736  |
| node_224:<br>feature_name=cg07344990 | feature_id[2926].value ><br>threshold=0.5750180780887604   |
| node_226:<br>feature_name=cg10558233 | feature_id[3780].value <=<br>threshold=0.7217690348625183  |
| node_227:<br>feature_name=cg08097359 | feature_id[3116].value ><br>threshold=0.3598180413246155   |
| node_229:<br>feature_name=cg22737001 | feature_id[6843].value <=<br>threshold=0.46281898021698    |
| node_230:<br>feature_name=cg24276624 | feature_id[7242].value ><br>threshold=0.6169979274272919   |
| node_232:<br>feature_name=cg04026354 | feature_id[1982].value <=<br>threshold=0.42332448065280914 |
| node_233:<br>feature_name=cg06038180 | feature_id[2529].value ><br>threshold=0.6430551409721375   |
| node_235:<br>feature_name=cg14104252 | feature_id[4735].value ><br>threshold=0.5213949382305145   |
| node_239:<br>feature_name=cg06711298 | feature_id[2707].value ><br>threshold=0.36770085990428925  |
| node_241:<br>feature_name=cg11703722 | feature_id[4056].value ><br>threshold=0.5125315636396408   |
| node_243:<br>feature_name=cg21230793 | feature_id[6514].value ><br>threshold=0.27807849645614624  |
| node_245:<br>feature_name=cg06225767 | feature_id[2575].value ><br>threshold=0.18034886568784714  |
| node_247:<br>feature_name=cg00941576 | feature_id[1053].value ><br>threshold=0.2476368322968483   |
| node_249:<br>feature_name=cg10149889 | feature_id[3676].value ><br>threshold=0.633601188659668    |
| node_257:<br>feature_name=cg07608094 | feature_id[2999].value ><br>threshold=0.7820693254470825   |
| node_259:<br>feature_name=cg03315432 | feature_id[1783].value ><br>threshold=0.6790387332439423   |
| node_261:<br>feature_name=cg07894983 | feature_id[3070].value ><br>threshold=0.3577418476343155   |
| node_263:<br>feature_name=cg15646741 | feature_id[5160].value <=<br>threshold=0.2826688587665558  |
| node_264:<br>feature_name=cg05400196 | feature_id[2366].value ><br>threshold=0.666697084903717    |

|                                      |                                                           |
|--------------------------------------|-----------------------------------------------------------|
| Class: reactive tissue (REA)         |                                                           |
|                                      |                                                           |
| Rules_33                             | passed counts:10                                          |
| node_0:<br>feature_name=cg11915444   | feature_id[4116].value ><br>threshold=0.3402601182460785  |
| node_10:<br>feature_name=cg12109728  | feature_id[4182].value ><br>threshold=0.7068270146846771  |
| node_20:<br>feature_name=cg10844382  | feature_id[3856].value ><br>threshold=0.5988894104957581  |
| node_24:<br>feature_name=cg00631702  | feature_id[943].value <=<br>threshold=0.37470583617687225 |
| node_25:<br>feature_name=cg07912144  | feature_id[3075].value ><br>threshold=0.5578519105911255  |
| node_29:<br>feature_name=cg24407065  | feature_id[388].value ><br>threshold=0.5364363789558411   |
| node_33:<br>feature_name=cg15275017  | feature_id[5069].value ><br>threshold=0.4538573920726776  |
| node_51:<br>feature_name=cg07281938  | feature_id[351].value ><br>threshold=0.7506992518901825   |
| node_73:<br>feature_name=cg17524821  | feature_id[5626].value ><br>threshold=0.4504699558019638  |
| node_75:<br>feature_name=cg02973735  | feature_id[1677].value ><br>threshold=0.29383400082588196 |
| node_77:<br>feature_name=cg23345038  | feature_id[7002].value ><br>threshold=0.6255057156085968  |
| node_79:<br>feature_name=cg17537493  | feature_id[5630].value ><br>threshold=0.5825372636318207  |
| node_85:<br>feature_name=cg12948116  | feature_id[4375].value <=<br>threshold=0.5658791363239288 |
| node_86:<br>feature_name=cg06038180  | feature_id[2529].value ><br>threshold=0.43877437710762024 |
| node_88:<br>feature_name=cg15720017  | feature_id[5175].value ><br>threshold=0.7009969055652618  |
| node_90:<br>feature_name=cg13070215  | feature_id[314].value <=<br>threshold=0.14645694941282272 |
| node_91:<br>feature_name=cg01014262  | feature_id[1082].value <=<br>threshold=0.5737917125225067 |
| node_92:<br>feature_name=cg16863382  | feature_id[5471].value ><br>threshold=0.7200668156147003  |
| node_102:<br>feature_name=cg06633739 | feature_id[2686].value ><br>threshold=0.47115950286388397 |
| node_126:<br>feature_name=cg22946562 | feature_id[744].value ><br>threshold=0.6194809079170227   |

|                                            |                                                           |
|--------------------------------------------|-----------------------------------------------------------|
| node_170:<br>feature_name=cg12120430       | feature_id[4185].value ><br>threshold=0.5775820016860962  |
| node_172:<br>feature_name=cg02137970       | feature_id[1411].value ><br>threshold=0.6705857813358307  |
| node_196:<br>feature_name=cg03393445       | feature_id[1807].value ><br>threshold=0.4260125905275345  |
| node_218:<br>feature_name=cg23525541       | feature_id[7049].value ><br>threshold=0.4485483318567276  |
| node_222:<br>feature_name=cg10543634       | feature_id[3775].value ><br>threshold=0.29505227506160736 |
| node_224:<br>feature_name=cg07344990       | feature_id[2926].value ><br>threshold=0.5750180780887604  |
| node_226:<br>feature_name=cg10558233       | feature_id[3780].value <=<br>threshold=0.7217690348625183 |
| node_227:<br>feature_name=cg08097359       | feature_id[3116].value <=<br>threshold=0.3598180413246155 |
| Class: Langerhans cell histiocytosis (LCH) |                                                           |
|                                            |                                                           |
| Rules_34                                   | passed counts:10                                          |
| node_0:<br>feature_name=cg11915444         | feature_id[4116].value ><br>threshold=0.3402601182460785  |
| node_10:<br>feature_name=cg12109728        | feature_id[4182].value ><br>threshold=0.7068270146846771  |
| node_20:<br>feature_name=cg10844382        | feature_id[3856].value ><br>threshold=0.5988894104957581  |
| node_24:<br>feature_name=cg00631702        | feature_id[943].value <=<br>threshold=0.37470583617687225 |
| node_25:<br>feature_name=cg07912144        | feature_id[3075].value ><br>threshold=0.5578519105911255  |
| node_29:<br>feature_name=cg24407065        | feature_id[388].value ><br>threshold=0.5364363789558411   |
| node_33:<br>feature_name=cg15275017        | feature_id[5069].value ><br>threshold=0.4538573920726776  |
| node_51:<br>feature_name=cg07281938        | feature_id[351].value ><br>threshold=0.7506992518901825   |
| node_73:<br>feature_name=cg17524821        | feature_id[5626].value ><br>threshold=0.4504699558019638  |
| node_75:<br>feature_name=cg02973735        | feature_id[1677].value ><br>threshold=0.29383400082588196 |
| node_77:<br>feature_name=cg23345038        | feature_id[7002].value ><br>threshold=0.6255057156085968  |
| node_79:<br>feature_name=cg17537493        | feature_id[5630].value ><br>threshold=0.5825372636318207  |



|                                                          |                                                           |
|----------------------------------------------------------|-----------------------------------------------------------|
| node_85:<br>feature_name=cg12948116                      | feature_id[4375].value <=<br>threshold=0.5658791363239288 |
| node_86:<br>feature_name=cg06038180                      | feature_id[2529].value ><br>threshold=0.43877437710762024 |
| node_88:<br>feature_name=cg15720017                      | feature_id[5175].value ><br>threshold=0.7009969055652618  |
| node_90:<br>feature_name=cg13070215                      | feature_id[314].value <=<br>threshold=0.14645694941282272 |
| node_91:<br>feature_name=cg01014262                      | feature_id[1082].value <=<br>threshold=0.5737917125225067 |
| node_92:<br>feature_name=cg16863382                      | feature_id[5471].value ><br>threshold=0.7200668156147003  |
| node_102:<br>feature_name=cg06633739                     | feature_id[2686].value ><br>threshold=0.47115950286388397 |
| node_126:<br>feature_name=cg22946562                     | feature_id[744].value ><br>threshold=0.6194809079170227   |
| node_170:<br>feature_name=cg12120430                     | feature_id[4185].value ><br>threshold=0.5775820016860962  |
| node_172:<br>feature_name=cg02137970                     | feature_id[1411].value ><br>threshold=0.6705857813358307  |
| node_196:<br>feature_name=cg03393445                     | feature_id[1807].value <=<br>threshold=0.4260125905275345 |
| node_197:<br>feature_name=cg01297744                     | feature_id[1157].value <=<br>threshold=0.8005762100219727 |
| node_198:<br>feature_name=cg08831077                     | feature_id[3310].value <=<br>threshold=0.4210805594921112 |
| node_199:<br>feature_name=cg11526020                     | feature_id[4010].value ><br>threshold=0.8567313253879547  |
| Class: high-grade endometrial stromal sarcoma (ESS (HG)) |                                                           |
|                                                          |                                                           |
| Rules_35                                                 | passed counts:10                                          |
| node_0:<br>feature_name=cg11915444                       | feature_id[4116].value ><br>threshold=0.3402601182460785  |
| node_10:<br>feature_name=cg12109728                      | feature_id[4182].value ><br>threshold=0.7068270146846771  |
| node_20:<br>feature_name=cg10844382                      | feature_id[3856].value ><br>threshold=0.5988894104957581  |
| node_24:<br>feature_name=cg00631702                      | feature_id[943].value <=<br>threshold=0.37470583617687225 |
| node_25:<br>feature_name=cg07912144                      | feature_id[3075].value ><br>threshold=0.5578519105911255  |
| node_29:<br>feature_name=cg24407065                      | feature_id[388].value ><br>threshold=0.5364363789558411   |

|                                                       |                                                           |
|-------------------------------------------------------|-----------------------------------------------------------|
| node_33:<br>feature_name=cg15275017                   | feature_id[5069].value ><br>threshold=0.4538573920726776  |
| node_51:<br>feature_name=cg07281938                   | feature_id[351].value ><br>threshold=0.7506992518901825   |
| node_73:<br>feature_name=cg17524821                   | feature_id[5626].value ><br>threshold=0.4504699558019638  |
| node_75:<br>feature_name=cg02973735                   | feature_id[1677].value ><br>threshold=0.29383400082588196 |
| node_77:<br>feature_name=cg23345038                   | feature_id[7002].value ><br>threshold=0.6255057156085968  |
| node_79:<br>feature_name=cg17537493                   | feature_id[5630].value ><br>threshold=0.5825372636318207  |
| node_85:<br>feature_name=cg12948116                   | feature_id[4375].value <=<br>threshold=0.5658791363239288 |
| node_86:<br>feature_name=cg06038180                   | feature_id[2529].value ><br>threshold=0.43877437710762024 |
| node_88:<br>feature_name=cg15720017                   | feature_id[5175].value ><br>threshold=0.7009969055652618  |
| node_90:<br>feature_name=cg13070215                   | feature_id[314].value <=<br>threshold=0.14645694941282272 |
| node_91:<br>feature_name=cg01014262                   | feature_id[1082].value <=<br>threshold=0.5737917125225067 |
| node_92:<br>feature_name=cg16863382                   | feature_id[5471].value ><br>threshold=0.7200668156147003  |
| node_102:<br>feature_name=cg06633739                  | feature_id[2686].value ><br>threshold=0.47115950286388397 |
| node_126:<br>feature_name=cg22946562                  | feature_id[744].value <=<br>threshold=0.6194809079170227  |
| node_127:<br>feature_name=cg23920016                  | feature_id[7139].value ><br>threshold=0.7449243068695068  |
| node_151:<br>feature_name=cg21617218                  | feature_id[6608].value <=<br>threshold=0.8795748353004456 |
| Class: high-grade conventional osteosarcoma (OS (HG)) |                                                           |
|                                                       |                                                           |
| Rules_36                                              | passed counts:10                                          |
| node_0:<br>feature_name=cg11915444                    | feature_id[4116].value ><br>threshold=0.3402601182460785  |
| node_10:<br>feature_name=cg12109728                   | feature_id[4182].value ><br>threshold=0.7068270146846771  |
| node_20:<br>feature_name=cg10844382                   | feature_id[3856].value ><br>threshold=0.5988894104957581  |
| node_24:<br>feature_name=cg00631702                   | feature_id[943].value <=<br>threshold=0.37470583617687225 |

|                                                                      |                                                           |
|----------------------------------------------------------------------|-----------------------------------------------------------|
| node_25:<br>feature_name=cg07912144                                  | feature_id[3075].value ><br>threshold=0.5578519105911255  |
| node_29:<br>feature_name=cg24407065                                  | feature_id[388].value ><br>threshold=0.5364363789558411   |
| node_33:<br>feature_name=cg15275017                                  | feature_id[5069].value ><br>threshold=0.4538573920726776  |
| node_51:<br>feature_name=cg07281938                                  | feature_id[351].value ><br>threshold=0.7506992518901825   |
| node_73:<br>feature_name=cg17524821                                  | feature_id[5626].value ><br>threshold=0.4504699558019638  |
| node_75:<br>feature_name=cg02973735                                  | feature_id[1677].value ><br>threshold=0.29383400082588196 |
| node_77:<br>feature_name=cg23345038                                  | feature_id[7002].value ><br>threshold=0.6255057156085968  |
| node_79:<br>feature_name=cg17537493                                  | feature_id[5630].value ><br>threshold=0.5825372636318207  |
| node_85:<br>feature_name=cg12948116                                  | feature_id[4375].value <=<br>threshold=0.5658791363239288 |
| node_86:<br>feature_name=cg06038180                                  | feature_id[2529].value ><br>threshold=0.43877437710762024 |
| node_88:<br>feature_name=cg15720017                                  | feature_id[5175].value ><br>threshold=0.7009969055652618  |
| node_90:<br>feature_name=cg13070215                                  | feature_id[314].value <=<br>threshold=0.14645694941282272 |
| node_91:<br>feature_name=cg01014262                                  | feature_id[1082].value <=<br>threshold=0.5737917125225067 |
| node_92:<br>feature_name=cg16863382                                  | feature_id[5471].value ><br>threshold=0.7200668156147003  |
| node_102:<br>feature_name=cg06633739                                 | feature_id[2686].value ><br>threshold=0.47115950286388397 |
| node_126:<br>feature_name=cg22946562                                 | feature_id[744].value <=<br>threshold=0.6194809079170227  |
| node_127:<br>feature_name=cg23920016                                 | feature_id[7139].value <=<br>threshold=0.7449243068695068 |
| node_128:<br>feature_name=cg16521032                                 | feature_id[5379].value <=<br>threshold=0.8948074877262115 |
| node_129:<br>feature_name=cg09597070                                 | feature_id[555].value ><br>threshold=0.67006054520607     |
| Class: atypical fibroxanthoma (AFX)/pleomorphic dermal sarcoma (PDS) |                                                           |
|                                                                      |                                                           |
| Rules_37                                                             | passed counts:9                                           |
| node_0:<br>feature_name=cg11915444                                   | feature_id[4116].value ><br>threshold=0.3402601182460785  |

|                                      |                                                           |
|--------------------------------------|-----------------------------------------------------------|
| node_10:<br>feature_name=cg12109728  | feature_id[4182].value ><br>threshold=0.7068270146846771  |
| node_20:<br>feature_name=cg10844382  | feature_id[3856].value ><br>threshold=0.5988894104957581  |
| node_24:<br>feature_name=cg00631702  | feature_id[943].value <=<br>threshold=0.37470583617687225 |
| node_25:<br>feature_name=cg07912144  | feature_id[3075].value ><br>threshold=0.5578519105911255  |
| node_29:<br>feature_name=cg24407065  | feature_id[388].value ><br>threshold=0.5364363789558411   |
| node_33:<br>feature_name=cg15275017  | feature_id[5069].value ><br>threshold=0.4538573920726776  |
| node_51:<br>feature_name=cg07281938  | feature_id[351].value ><br>threshold=0.7506992518901825   |
| node_73:<br>feature_name=cg17524821  | feature_id[5626].value ><br>threshold=0.4504699558019638  |
| node_75:<br>feature_name=cg02973735  | feature_id[1677].value ><br>threshold=0.29383400082588196 |
| node_77:<br>feature_name=cg23345038  | feature_id[7002].value ><br>threshold=0.6255057156085968  |
| node_79:<br>feature_name=cg17537493  | feature_id[5630].value ><br>threshold=0.5825372636318207  |
| node_85:<br>feature_name=cg12948116  | feature_id[4375].value <=<br>threshold=0.5658791363239288 |
| node_86:<br>feature_name=cg06038180  | feature_id[2529].value ><br>threshold=0.43877437710762024 |
| node_88:<br>feature_name=cg15720017  | feature_id[5175].value ><br>threshold=0.7009969055652618  |
| node_90:<br>feature_name=cg13070215  | feature_id[314].value <=<br>threshold=0.14645694941282272 |
| node_91:<br>feature_name=cg01014262  | feature_id[1082].value <=<br>threshold=0.5737917125225067 |
| node_92:<br>feature_name=cg16863382  | feature_id[5471].value ><br>threshold=0.7200668156147003  |
| node_102:<br>feature_name=cg06633739 | feature_id[2686].value ><br>threshold=0.47115950286388397 |
| node_126:<br>feature_name=cg22946562 | feature_id[744].value ><br>threshold=0.6194809079170227   |
| node_170:<br>feature_name=cg12120430 | feature_id[4185].value ><br>threshold=0.5775820016860962  |
| node_172:<br>feature_name=cg02137970 | feature_id[1411].value ><br>threshold=0.6705857813358307  |
| node_196:<br>feature_name=cg03393445 | feature_id[1807].value ><br>threshold=0.4260125905275345  |

|                                      |                                                            |
|--------------------------------------|------------------------------------------------------------|
| node_218:<br>feature_name=cg23525541 | feature_id[7049].value ><br>threshold=0.4485483318567276   |
| node_222:<br>feature_name=cg10543634 | feature_id[3775].value ><br>threshold=0.29505227506160736  |
| node_224:<br>feature_name=cg07344990 | feature_id[2926].value ><br>threshold=0.5750180780887604   |
| node_226:<br>feature_name=cg10558233 | feature_id[3780].value <=<br>threshold=0.7217690348625183  |
| node_227:<br>feature_name=cg08097359 | feature_id[3116].value ><br>threshold=0.3598180413246155   |
| node_229:<br>feature_name=cg22737001 | feature_id[6843].value <=<br>threshold=0.46281898021698    |
| node_230:<br>feature_name=cg24276624 | feature_id[7242].value ><br>threshold=0.6169979274272919   |
| node_232:<br>feature_name=cg04026354 | feature_id[1982].value <=<br>threshold=0.42332448065280914 |
| node_233:<br>feature_name=cg06038180 | feature_id[2529].value ><br>threshold=0.6430551409721375   |
| node_235:<br>feature_name=cg14104252 | feature_id[4735].value ><br>threshold=0.5213949382305145   |
| node_239:<br>feature_name=cg06711298 | feature_id[2707].value ><br>threshold=0.36770085990428925  |
| node_241:<br>feature_name=cg11703722 | feature_id[4056].value ><br>threshold=0.5125315636396408   |
| node_243:<br>feature_name=cg21230793 | feature_id[6514].value ><br>threshold=0.27807849645614624  |
| node_245:<br>feature_name=cg06225767 | feature_id[2575].value ><br>threshold=0.18034886568784714  |
| node_247:<br>feature_name=cg00941576 | feature_id[1053].value ><br>threshold=0.2476368322968483   |
| node_249:<br>feature_name=cg10149889 | feature_id[3676].value <=<br>threshold=0.633601188659668   |
| node_250:<br>feature_name=cg03631837 | feature_id[1881].value ><br>threshold=0.8389041423797607   |
| Class: nodular fasciitis(NFA)        |                                                            |
|                                      |                                                            |
| Rules_38                             | passed counts:9                                            |
| node_0:<br>feature_name=cg11915444   | feature_id[4116].value ><br>threshold=0.3402601182460785   |
| node_10:<br>feature_name=cg12109728  | feature_id[4182].value ><br>threshold=0.7068270146846771   |
| node_20:<br>feature_name=cg10844382  | feature_id[3856].value ><br>threshold=0.5988894104957581   |

|                                      |                                                           |
|--------------------------------------|-----------------------------------------------------------|
| node_24:<br>feature_name=cg00631702  | feature_id[943].value <=<br>threshold=0.37470583617687225 |
| node_25:<br>feature_name=cg07912144  | feature_id[3075].value ><br>threshold=0.5578519105911255  |
| node_29:<br>feature_name=cg24407065  | feature_id[388].value ><br>threshold=0.5364363789558411   |
| node_33:<br>feature_name=cg15275017  | feature_id[5069].value ><br>threshold=0.4538573920726776  |
| node_51:<br>feature_name=cg07281938  | feature_id[351].value ><br>threshold=0.7506992518901825   |
| node_73:<br>feature_name=cg17524821  | feature_id[5626].value ><br>threshold=0.4504699558019638  |
| node_75:<br>feature_name=cg02973735  | feature_id[1677].value ><br>threshold=0.29383400082588196 |
| node_77:<br>feature_name=cg23345038  | feature_id[7002].value ><br>threshold=0.6255057156085968  |
| node_79:<br>feature_name=cg17537493  | feature_id[5630].value ><br>threshold=0.5825372636318207  |
| node_85:<br>feature_name=cg12948116  | feature_id[4375].value <=<br>threshold=0.5658791363239288 |
| node_86:<br>feature_name=cg06038180  | feature_id[2529].value ><br>threshold=0.43877437710762024 |
| node_88:<br>feature_name=cg15720017  | feature_id[5175].value ><br>threshold=0.7009969055652618  |
| node_90:<br>feature_name=cg13070215  | feature_id[314].value <=<br>threshold=0.14645694941282272 |
| node_91:<br>feature_name=cg01014262  | feature_id[1082].value <=<br>threshold=0.5737917125225067 |
| node_92:<br>feature_name=cg16863382  | feature_id[5471].value ><br>threshold=0.7200668156147003  |
| node_102:<br>feature_name=cg06633739 | feature_id[2686].value ><br>threshold=0.47115950286388397 |
| node_126:<br>feature_name=cg22946562 | feature_id[744].value ><br>threshold=0.6194809079170227   |
| node_170:<br>feature_name=cg12120430 | feature_id[4185].value ><br>threshold=0.5775820016860962  |
| node_172:<br>feature_name=cg02137970 | feature_id[1411].value ><br>threshold=0.6705857813358307  |
| node_196:<br>feature_name=cg03393445 | feature_id[1807].value ><br>threshold=0.4260125905275345  |
| node_218:<br>feature_name=cg23525541 | feature_id[7049].value ><br>threshold=0.4485483318567276  |
| node_222:<br>feature_name=cg10543634 | feature_id[3775].value ><br>threshold=0.29505227506160736 |

|                                                |                                                            |
|------------------------------------------------|------------------------------------------------------------|
| node_224:<br>feature_name=cg07344990           | feature_id[2926].value ><br>threshold=0.5750180780887604   |
| node_226:<br>feature_name=cg10558233           | feature_id[3780].value <=<br>threshold=0.7217690348625183  |
| node_227:<br>feature_name=cg08097359           | feature_id[3116].value ><br>threshold=0.3598180413246155   |
| node_229:<br>feature_name=cg22737001           | feature_id[6843].value <=<br>threshold=0.46281898021698    |
| node_230:<br>feature_name=cg24276624           | feature_id[7242].value ><br>threshold=0.6169979274272919   |
| node_232:<br>feature_name=cg04026354           | feature_id[1982].value <=<br>threshold=0.42332448065280914 |
| node_233:<br>feature_name=cg06038180           | feature_id[2529].value ><br>threshold=0.6430551409721375   |
| node_235:<br>feature_name=cg14104252           | feature_id[4735].value <=<br>threshold=0.5213949382305145  |
| node_236:<br>feature_name=cg12163781           | feature_id[4197].value ><br>threshold=0.6278624832630157   |
| Class: epithelioid haemangioendothelioma (EHE) |                                                            |
|                                                |                                                            |
| Rules_39                                       | passed counts:9                                            |
| node_0:<br>feature_name=cg11915444             | feature_id[4116].value ><br>threshold=0.3402601182460785   |
| node_10:<br>feature_name=cg12109728            | feature_id[4182].value ><br>threshold=0.7068270146846771   |
| node_20:<br>feature_name=cg10844382            | feature_id[3856].value ><br>threshold=0.5988894104957581   |
| node_24:<br>feature_name=cg00631702            | feature_id[943].value <=<br>threshold=0.37470583617687225  |
| node_25:<br>feature_name=cg07912144            | feature_id[3075].value ><br>threshold=0.5578519105911255   |
| node_29:<br>feature_name=cg24407065            | feature_id[388].value ><br>threshold=0.5364363789558411    |
| node_33:<br>feature_name=cg15275017            | feature_id[5069].value ><br>threshold=0.4538573920726776   |
| node_51:<br>feature_name=cg07281938            | feature_id[351].value ><br>threshold=0.7506992518901825    |
| node_73:<br>feature_name=cg17524821            | feature_id[5626].value ><br>threshold=0.4504699558019638   |
| node_75:<br>feature_name=cg02973735            | feature_id[1677].value ><br>threshold=0.29383400082588196  |
| node_77:<br>feature_name=cg23345038            | feature_id[7002].value ><br>threshold=0.6255057156085968   |

|                                      |                                                            |
|--------------------------------------|------------------------------------------------------------|
| node_79:<br>feature_name=cg17537493  | feature_id[5630].value ><br>threshold=0.5825372636318207   |
| node_85:<br>feature_name=cg12948116  | feature_id[4375].value <=<br>threshold=0.5658791363239288  |
| node_86:<br>feature_name=cg06038180  | feature_id[2529].value ><br>threshold=0.43877437710762024  |
| node_88:<br>feature_name=cg15720017  | feature_id[5175].value ><br>threshold=0.7009969055652618   |
| node_90:<br>feature_name=cg13070215  | feature_id[314].value <=<br>threshold=0.14645694941282272  |
| node_91:<br>feature_name=cg01014262  | feature_id[1082].value <=<br>threshold=0.5737917125225067  |
| node_92:<br>feature_name=cg16863382  | feature_id[5471].value ><br>threshold=0.7200668156147003   |
| node_102:<br>feature_name=cg06633739 | feature_id[2686].value ><br>threshold=0.47115950286388397  |
| node_126:<br>feature_name=cg22946562 | feature_id[744].value ><br>threshold=0.6194809079170227    |
| node_170:<br>feature_name=cg12120430 | feature_id[4185].value ><br>threshold=0.5775820016860962   |
| node_172:<br>feature_name=cg02137970 | feature_id[1411].value ><br>threshold=0.6705857813358307   |
| node_196:<br>feature_name=cg03393445 | feature_id[1807].value ><br>threshold=0.4260125905275345   |
| node_218:<br>feature_name=cg23525541 | feature_id[7049].value ><br>threshold=0.4485483318567276   |
| node_222:<br>feature_name=cg10543634 | feature_id[3775].value ><br>threshold=0.29505227506160736  |
| node_224:<br>feature_name=cg07344990 | feature_id[2926].value ><br>threshold=0.5750180780887604   |
| node_226:<br>feature_name=cg10558233 | feature_id[3780].value <=<br>threshold=0.7217690348625183  |
| node_227:<br>feature_name=cg08097359 | feature_id[3116].value ><br>threshold=0.3598180413246155   |
| node_229:<br>feature_name=cg22737001 | feature_id[6843].value <=<br>threshold=0.46281898021698    |
| node_230:<br>feature_name=cg24276624 | feature_id[7242].value ><br>threshold=0.6169979274272919   |
| node_232:<br>feature_name=cg04026354 | feature_id[1982].value <=<br>threshold=0.42332448065280914 |
| node_233:<br>feature_name=cg06038180 | feature_id[2529].value <=<br>threshold=0.6430551409721375  |
| Class: neurofibroma (NFB)            |                                                            |



|                                      |                                                           |
|--------------------------------------|-----------------------------------------------------------|
|                                      |                                                           |
| Rules_40                             | passed counts:9                                           |
| node_0:<br>feature_name=cg11915444   | feature_id[4116].value ><br>threshold=0.3402601182460785  |
| node_10:<br>feature_name=cg12109728  | feature_id[4182].value ><br>threshold=0.7068270146846771  |
| node_20:<br>feature_name=cg10844382  | feature_id[3856].value ><br>threshold=0.5988894104957581  |
| node_24:<br>feature_name=cg00631702  | feature_id[943].value <=<br>threshold=0.37470583617687225 |
| node_25:<br>feature_name=cg07912144  | feature_id[3075].value ><br>threshold=0.5578519105911255  |
| node_29:<br>feature_name=cg24407065  | feature_id[388].value ><br>threshold=0.5364363789558411   |
| node_33:<br>feature_name=cg15275017  | feature_id[5069].value ><br>threshold=0.4538573920726776  |
| node_51:<br>feature_name=cg07281938  | feature_id[351].value ><br>threshold=0.7506992518901825   |
| node_73:<br>feature_name=cg17524821  | feature_id[5626].value ><br>threshold=0.4504699558019638  |
| node_75:<br>feature_name=cg02973735  | feature_id[1677].value ><br>threshold=0.29383400082588196 |
| node_77:<br>feature_name=cg23345038  | feature_id[7002].value ><br>threshold=0.6255057156085968  |
| node_79:<br>feature_name=cg17537493  | feature_id[5630].value ><br>threshold=0.5825372636318207  |
| node_85:<br>feature_name=cg12948116  | feature_id[4375].value <=<br>threshold=0.5658791363239288 |
| node_86:<br>feature_name=cg06038180  | feature_id[2529].value ><br>threshold=0.43877437710762024 |
| node_88:<br>feature_name=cg15720017  | feature_id[5175].value ><br>threshold=0.7009969055652618  |
| node_90:<br>feature_name=cg13070215  | feature_id[314].value <=<br>threshold=0.14645694941282272 |
| node_91:<br>feature_name=cg01014262  | feature_id[1082].value <=<br>threshold=0.5737917125225067 |
| node_92:<br>feature_name=cg16863382  | feature_id[5471].value ><br>threshold=0.7200668156147003  |
| node_102:<br>feature_name=cg06633739 | feature_id[2686].value ><br>threshold=0.47115950286388397 |
| node_126:<br>feature_name=cg22946562 | feature_id[744].value ><br>threshold=0.6194809079170227   |

|                                                      |                                                           |
|------------------------------------------------------|-----------------------------------------------------------|
| node_170:<br>feature_name=cg12120430                 | feature_id[4185].value ><br>threshold=0.5775820016860962  |
| node_172:<br>feature_name=cg02137970                 | feature_id[1411].value ><br>threshold=0.6705857813358307  |
| node_196:<br>feature_name=cg03393445                 | feature_id[1807].value ><br>threshold=0.4260125905275345  |
| node_218:<br>feature_name=cg23525541                 | feature_id[7049].value ><br>threshold=0.4485483318567276  |
| node_222:<br>feature_name=cg10543634                 | feature_id[3775].value ><br>threshold=0.29505227506160736 |
| node_224:<br>feature_name=cg07344990                 | feature_id[2926].value ><br>threshold=0.5750180780887604  |
| node_226:<br>feature_name=cg10558233                 | feature_id[3780].value <=<br>threshold=0.7217690348625183 |
| node_227:<br>feature_name=cg08097359                 | feature_id[3116].value ><br>threshold=0.3598180413246155  |
| node_229:<br>feature_name=cg22737001                 | feature_id[6843].value <=<br>threshold=0.46281898021698   |
| node_230:<br>feature_name=cg24276624                 | feature_id[7242].value <=<br>threshold=0.6169979274272919 |
| Class: cutaneous squamous cell carcinoma (SCC (CUT)) |                                                           |
|                                                      |                                                           |
| Rules_41                                             | passed counts:8                                           |
| node_0:<br>feature_name=cg11915444                   | feature_id[4116].value ><br>threshold=0.3402601182460785  |
| node_10:<br>feature_name=cg12109728                  | feature_id[4182].value ><br>threshold=0.7068270146846771  |
| node_20:<br>feature_name=cg10844382                  | feature_id[3856].value ><br>threshold=0.5988894104957581  |
| node_24:<br>feature_name=cg00631702                  | feature_id[943].value <=<br>threshold=0.37470583617687225 |
| node_25:<br>feature_name=cg07912144                  | feature_id[3075].value ><br>threshold=0.5578519105911255  |
| node_29:<br>feature_name=cg24407065                  | feature_id[388].value ><br>threshold=0.5364363789558411   |
| node_33:<br>feature_name=cg15275017                  | feature_id[5069].value ><br>threshold=0.4538573920726776  |
| node_51:<br>feature_name=cg07281938                  | feature_id[351].value ><br>threshold=0.7506992518901825   |
| node_73:<br>feature_name=cg17524821                  | feature_id[5626].value ><br>threshold=0.4504699558019638  |
| node_75:<br>feature_name=cg02973735                  | feature_id[1677].value ><br>threshold=0.29383400082588196 |

|                                      |                                                            |
|--------------------------------------|------------------------------------------------------------|
| node_77:<br>feature_name=cg23345038  | feature_id[7002].value ><br>threshold=0.6255057156085968   |
| node_79:<br>feature_name=cg17537493  | feature_id[5630].value ><br>threshold=0.5825372636318207   |
| node_85:<br>feature_name=cg12948116  | feature_id[4375].value <=<br>threshold=0.5658791363239288  |
| node_86:<br>feature_name=cg06038180  | feature_id[2529].value ><br>threshold=0.43877437710762024  |
| node_88:<br>feature_name=cg15720017  | feature_id[5175].value ><br>threshold=0.7009969055652618   |
| node_90:<br>feature_name=cg13070215  | feature_id[314].value <=<br>threshold=0.14645694941282272  |
| node_91:<br>feature_name=cg01014262  | feature_id[1082].value <=<br>threshold=0.5737917125225067  |
| node_92:<br>feature_name=cg16863382  | feature_id[5471].value ><br>threshold=0.7200668156147003   |
| node_102:<br>feature_name=cg06633739 | feature_id[2686].value ><br>threshold=0.47115950286388397  |
| node_126:<br>feature_name=cg22946562 | feature_id[744].value ><br>threshold=0.6194809079170227    |
| node_170:<br>feature_name=cg12120430 | feature_id[4185].value ><br>threshold=0.5775820016860962   |
| node_172:<br>feature_name=cg02137970 | feature_id[1411].value ><br>threshold=0.6705857813358307   |
| node_196:<br>feature_name=cg03393445 | feature_id[1807].value ><br>threshold=0.4260125905275345   |
| node_218:<br>feature_name=cg23525541 | feature_id[7049].value ><br>threshold=0.4485483318567276   |
| node_222:<br>feature_name=cg10543634 | feature_id[3775].value ><br>threshold=0.29505227506160736  |
| node_224:<br>feature_name=cg07344990 | feature_id[2926].value ><br>threshold=0.5750180780887604   |
| node_226:<br>feature_name=cg10558233 | feature_id[3780].value <=<br>threshold=0.7217690348625183  |
| node_227:<br>feature_name=cg08097359 | feature_id[3116].value ><br>threshold=0.3598180413246155   |
| node_229:<br>feature_name=cg22737001 | feature_id[6843].value <=<br>threshold=0.46281898021698    |
| node_230:<br>feature_name=cg24276624 | feature_id[7242].value ><br>threshold=0.6169979274272919   |
| node_232:<br>feature_name=cg04026354 | feature_id[1982].value <=<br>threshold=0.42332448065280914 |
| node_233:<br>feature_name=cg06038180 | feature_id[2529].value ><br>threshold=0.6430551409721375   |

|                                      |                                                           |
|--------------------------------------|-----------------------------------------------------------|
| node_235:<br>feature_name=cg14104252 | feature_id[4735].value ><br>threshold=0.5213949382305145  |
| node_239:<br>feature_name=cg06711298 | feature_id[2707].value ><br>threshold=0.36770085990428925 |
| node_241:<br>feature_name=cg11703722 | feature_id[4056].value ><br>threshold=0.5125315636396408  |
| node_243:<br>feature_name=cg21230793 | feature_id[6514].value ><br>threshold=0.27807849645614624 |
| node_245:<br>feature_name=cg06225767 | feature_id[2575].value ><br>threshold=0.18034886568784714 |
| node_247:<br>feature_name=cg00941576 | feature_id[1053].value ><br>threshold=0.2476368322968483  |
| node_249:<br>feature_name=cg10149889 | feature_id[3676].value <=<br>threshold=0.633601188659668  |
| node_250:<br>feature_name=cg03631837 | feature_id[1881].value <=<br>threshold=0.8389041423797607 |
| node_251:<br>feature_name=cg18201671 | feature_id[5790].value <=<br>threshold=0.7097389698028564 |
| Class: myositis ossificans (MO)      |                                                           |
|                                      |                                                           |
| Rules_42                             | passed counts:8                                           |
| node_0:<br>feature_name=cg11915444   | feature_id[4116].value ><br>threshold=0.3402601182460785  |
| node_10:<br>feature_name=cg12109728  | feature_id[4182].value ><br>threshold=0.7068270146846771  |
| node_20:<br>feature_name=cg10844382  | feature_id[3856].value ><br>threshold=0.5988894104957581  |
| node_24:<br>feature_name=cg00631702  | feature_id[943].value <=<br>threshold=0.37470583617687225 |
| node_25:<br>feature_name=cg07912144  | feature_id[3075].value ><br>threshold=0.5578519105911255  |
| node_29:<br>feature_name=cg24407065  | feature_id[388].value ><br>threshold=0.5364363789558411   |
| node_33:<br>feature_name=cg15275017  | feature_id[5069].value ><br>threshold=0.4538573920726776  |
| node_51:<br>feature_name=cg07281938  | feature_id[351].value ><br>threshold=0.7506992518901825   |
| node_73:<br>feature_name=cg17524821  | feature_id[5626].value ><br>threshold=0.4504699558019638  |
| node_75:<br>feature_name=cg02973735  | feature_id[1677].value ><br>threshold=0.29383400082588196 |
| node_77:<br>feature_name=cg23345038  | feature_id[7002].value ><br>threshold=0.6255057156085968  |

|                                      |                                                            |
|--------------------------------------|------------------------------------------------------------|
| node_79:<br>feature_name=cg17537493  | feature_id[5630].value ><br>threshold=0.5825372636318207   |
| node_85:<br>feature_name=cg12948116  | feature_id[4375].value <=<br>threshold=0.5658791363239288  |
| node_86:<br>feature_name=cg06038180  | feature_id[2529].value ><br>threshold=0.43877437710762024  |
| node_88:<br>feature_name=cg15720017  | feature_id[5175].value ><br>threshold=0.7009969055652618   |
| node_90:<br>feature_name=cg13070215  | feature_id[314].value <=<br>threshold=0.14645694941282272  |
| node_91:<br>feature_name=cg01014262  | feature_id[1082].value <=<br>threshold=0.5737917125225067  |
| node_92:<br>feature_name=cg16863382  | feature_id[5471].value ><br>threshold=0.7200668156147003   |
| node_102:<br>feature_name=cg06633739 | feature_id[2686].value ><br>threshold=0.47115950286388397  |
| node_126:<br>feature_name=cg22946562 | feature_id[744].value ><br>threshold=0.6194809079170227    |
| node_170:<br>feature_name=cg12120430 | feature_id[4185].value ><br>threshold=0.5775820016860962   |
| node_172:<br>feature_name=cg02137970 | feature_id[1411].value ><br>threshold=0.6705857813358307   |
| node_196:<br>feature_name=cg03393445 | feature_id[1807].value ><br>threshold=0.4260125905275345   |
| node_218:<br>feature_name=cg23525541 | feature_id[7049].value ><br>threshold=0.4485483318567276   |
| node_222:<br>feature_name=cg10543634 | feature_id[3775].value ><br>threshold=0.29505227506160736  |
| node_224:<br>feature_name=cg07344990 | feature_id[2926].value ><br>threshold=0.5750180780887604   |
| node_226:<br>feature_name=cg10558233 | feature_id[3780].value <=<br>threshold=0.7217690348625183  |
| node_227:<br>feature_name=cg08097359 | feature_id[3116].value ><br>threshold=0.3598180413246155   |
| node_229:<br>feature_name=cg22737001 | feature_id[6843].value <=<br>threshold=0.46281898021698    |
| node_230:<br>feature_name=cg24276624 | feature_id[7242].value ><br>threshold=0.6169979274272919   |
| node_232:<br>feature_name=cg04026354 | feature_id[1982].value <=<br>threshold=0.42332448065280914 |
| node_233:<br>feature_name=cg06038180 | feature_id[2529].value ><br>threshold=0.6430551409721375   |
| node_235:<br>feature_name=cg14104252 | feature_id[4735].value ><br>threshold=0.5213949382305145   |

|                                              |                                                           |
|----------------------------------------------|-----------------------------------------------------------|
| node_239:<br>feature_name=cg06711298         | feature_id[2707].value ><br>threshold=0.36770085990428925 |
| node_241:<br>feature_name=cg11703722         | feature_id[4056].value ><br>threshold=0.5125315636396408  |
| node_243:<br>feature_name=cg21230793         | feature_id[6514].value ><br>threshold=0.27807849645614624 |
| node_245:<br>feature_name=cg06225767         | feature_id[2575].value ><br>threshold=0.18034886568784714 |
| node_247:<br>feature_name=cg00941576         | feature_id[1053].value <=<br>threshold=0.2476368322968483 |
| Class: low-grade fibromyxoid sarcoma (LGFMS) |                                                           |
|                                              |                                                           |
| Rules_43                                     | passed counts:8                                           |
| node_0:<br>feature_name=cg11915444           | feature_id[4116].value ><br>threshold=0.3402601182460785  |
| node_10:<br>feature_name=cg12109728          | feature_id[4182].value ><br>threshold=0.7068270146846771  |
| node_20:<br>feature_name=cg10844382          | feature_id[3856].value ><br>threshold=0.5988894104957581  |
| node_24:<br>feature_name=cg00631702          | feature_id[943].value <=<br>threshold=0.37470583617687225 |
| node_25:<br>feature_name=cg07912144          | feature_id[3075].value ><br>threshold=0.5578519105911255  |
| node_29:<br>feature_name=cg24407065          | feature_id[388].value ><br>threshold=0.5364363789558411   |
| node_33:<br>feature_name=cg15275017          | feature_id[5069].value ><br>threshold=0.4538573920726776  |
| node_51:<br>feature_name=cg07281938          | feature_id[351].value ><br>threshold=0.7506992518901825   |
| node_73:<br>feature_name=cg17524821          | feature_id[5626].value ><br>threshold=0.4504699558019638  |
| node_75:<br>feature_name=cg02973735          | feature_id[1677].value ><br>threshold=0.29383400082588196 |
| node_77:<br>feature_name=cg23345038          | feature_id[7002].value ><br>threshold=0.6255057156085968  |
| node_79:<br>feature_name=cg17537493          | feature_id[5630].value ><br>threshold=0.5825372636318207  |
| node_85:<br>feature_name=cg12948116          | feature_id[4375].value <=<br>threshold=0.5658791363239288 |
| node_86:<br>feature_name=cg06038180          | feature_id[2529].value ><br>threshold=0.43877437710762024 |
| node_88:<br>feature_name=cg15720017          | feature_id[5175].value ><br>threshold=0.7009969055652618  |

|                                      |                                                            |
|--------------------------------------|------------------------------------------------------------|
| node_90:<br>feature_name=cg13070215  | feature_id[314].value <=<br>threshold=0.14645694941282272  |
| node_91:<br>feature_name=cg01014262  | feature_id[1082].value <=<br>threshold=0.5737917125225067  |
| node_92:<br>feature_name=cg16863382  | feature_id[5471].value ><br>threshold=0.7200668156147003   |
| node_102:<br>feature_name=cg06633739 | feature_id[2686].value ><br>threshold=0.47115950286388397  |
| node_126:<br>feature_name=cg22946562 | feature_id[744].value ><br>threshold=0.6194809079170227    |
| node_170:<br>feature_name=cg12120430 | feature_id[4185].value ><br>threshold=0.5775820016860962   |
| node_172:<br>feature_name=cg02137970 | feature_id[1411].value ><br>threshold=0.6705857813358307   |
| node_196:<br>feature_name=cg03393445 | feature_id[1807].value ><br>threshold=0.4260125905275345   |
| node_218:<br>feature_name=cg23525541 | feature_id[7049].value ><br>threshold=0.4485483318567276   |
| node_222:<br>feature_name=cg10543634 | feature_id[3775].value ><br>threshold=0.29505227506160736  |
| node_224:<br>feature_name=cg07344990 | feature_id[2926].value ><br>threshold=0.5750180780887604   |
| node_226:<br>feature_name=cg10558233 | feature_id[3780].value <=<br>threshold=0.7217690348625183  |
| node_227:<br>feature_name=cg08097359 | feature_id[3116].value ><br>threshold=0.3598180413246155   |
| node_229:<br>feature_name=cg22737001 | feature_id[6843].value <=<br>threshold=0.46281898021698    |
| node_230:<br>feature_name=cg24276624 | feature_id[7242].value ><br>threshold=0.6169979274272919   |
| node_232:<br>feature_name=cg04026354 | feature_id[1982].value <=<br>threshold=0.42332448065280914 |
| node_233:<br>feature_name=cg06038180 | feature_id[2529].value ><br>threshold=0.6430551409721375   |
| node_235:<br>feature_name=cg14104252 | feature_id[4735].value ><br>threshold=0.5213949382305145   |
| node_239:<br>feature_name=cg06711298 | feature_id[2707].value ><br>threshold=0.36770085990428925  |
| node_241:<br>feature_name=cg11703722 | feature_id[4056].value ><br>threshold=0.5125315636396408   |
| node_243:<br>feature_name=cg21230793 | feature_id[6514].value ><br>threshold=0.27807849645614624  |
| node_245:<br>feature_name=cg06225767 | feature_id[2575].value <=<br>threshold=0.18034886568784714 |

|                                      |                                                           |
|--------------------------------------|-----------------------------------------------------------|
| Class: infantile fibrosarcoma (IFS)  |                                                           |
|                                      |                                                           |
| Rules_44                             | passed counts:8                                           |
| node_0:<br>feature_name=cg11915444   | feature_id[4116].value ><br>threshold=0.3402601182460785  |
| node_10:<br>feature_name=cg12109728  | feature_id[4182].value ><br>threshold=0.7068270146846771  |
| node_20:<br>feature_name=cg10844382  | feature_id[3856].value ><br>threshold=0.5988894104957581  |
| node_24:<br>feature_name=cg00631702  | feature_id[943].value <=<br>threshold=0.37470583617687225 |
| node_25:<br>feature_name=cg07912144  | feature_id[3075].value ><br>threshold=0.5578519105911255  |
| node_29:<br>feature_name=cg24407065  | feature_id[388].value ><br>threshold=0.5364363789558411   |
| node_33:<br>feature_name=cg15275017  | feature_id[5069].value ><br>threshold=0.4538573920726776  |
| node_51:<br>feature_name=cg07281938  | feature_id[351].value ><br>threshold=0.7506992518901825   |
| node_73:<br>feature_name=cg17524821  | feature_id[5626].value ><br>threshold=0.4504699558019638  |
| node_75:<br>feature_name=cg02973735  | feature_id[1677].value ><br>threshold=0.29383400082588196 |
| node_77:<br>feature_name=cg23345038  | feature_id[7002].value ><br>threshold=0.6255057156085968  |
| node_79:<br>feature_name=cg17537493  | feature_id[5630].value ><br>threshold=0.5825372636318207  |
| node_85:<br>feature_name=cg12948116  | feature_id[4375].value <=<br>threshold=0.5658791363239288 |
| node_86:<br>feature_name=cg06038180  | feature_id[2529].value ><br>threshold=0.43877437710762024 |
| node_88:<br>feature_name=cg15720017  | feature_id[5175].value ><br>threshold=0.7009969055652618  |
| node_90:<br>feature_name=cg13070215  | feature_id[314].value <=<br>threshold=0.14645694941282272 |
| node_91:<br>feature_name=cg01014262  | feature_id[1082].value <=<br>threshold=0.5737917125225067 |
| node_92:<br>feature_name=cg16863382  | feature_id[5471].value ><br>threshold=0.7200668156147003  |
| node_102:<br>feature_name=cg06633739 | feature_id[2686].value ><br>threshold=0.47115950286388397 |
| node_126:<br>feature_name=cg22946562 | feature_id[744].value ><br>threshold=0.6194809079170227   |



|                                               |                                                            |
|-----------------------------------------------|------------------------------------------------------------|
| node_170:<br>feature_name=cg12120430          | feature_id[4185].value ><br>threshold=0.5775820016860962   |
| node_172:<br>feature_name=cg02137970          | feature_id[1411].value ><br>threshold=0.6705857813358307   |
| node_196:<br>feature_name=cg03393445          | feature_id[1807].value ><br>threshold=0.4260125905275345   |
| node_218:<br>feature_name=cg23525541          | feature_id[7049].value ><br>threshold=0.4485483318567276   |
| node_222:<br>feature_name=cg10543634          | feature_id[3775].value ><br>threshold=0.29505227506160736  |
| node_224:<br>feature_name=cg07344990          | feature_id[2926].value ><br>threshold=0.5750180780887604   |
| node_226:<br>feature_name=cg10558233          | feature_id[3780].value <=<br>threshold=0.7217690348625183  |
| node_227:<br>feature_name=cg08097359          | feature_id[3116].value ><br>threshold=0.3598180413246155   |
| node_229:<br>feature_name=cg22737001          | feature_id[6843].value <=<br>threshold=0.46281898021698    |
| node_230:<br>feature_name=cg24276624          | feature_id[7242].value ><br>threshold=0.6169979274272919   |
| node_232:<br>feature_name=cg04026354          | feature_id[1982].value <=<br>threshold=0.42332448065280914 |
| node_233:<br>feature_name=cg06038180          | feature_id[2529].value ><br>threshold=0.6430551409721375   |
| node_235:<br>feature_name=cg14104252          | feature_id[4735].value ><br>threshold=0.5213949382305145   |
| node_239:<br>feature_name=cg06711298          | feature_id[2707].value ><br>threshold=0.36770085990428925  |
| node_241:<br>feature_name=cg11703722          | feature_id[4056].value ><br>threshold=0.5125315636396408   |
| node_243:<br>feature_name=cg21230793          | feature_id[6514].value <=<br>threshold=0.27807849645614624 |
| Class: clear cell sarcoma of soft parts (CCS) |                                                            |
|                                               |                                                            |
| Rules_45                                      | passed counts:8                                            |
| node_0:<br>feature_name=cg11915444            | feature_id[4116].value ><br>threshold=0.3402601182460785   |
| node_10:<br>feature_name=cg12109728           | feature_id[4182].value ><br>threshold=0.7068270146846771   |
| node_20:<br>feature_name=cg10844382           | feature_id[3856].value ><br>threshold=0.5988894104957581   |
| node_24:<br>feature_name=cg00631702           | feature_id[943].value <=<br>threshold=0.37470583617687225  |

|                                      |                                                           |
|--------------------------------------|-----------------------------------------------------------|
| node_25:<br>feature_name=cg07912144  | feature_id[3075].value ><br>threshold=0.5578519105911255  |
| node_29:<br>feature_name=cg24407065  | feature_id[388].value ><br>threshold=0.5364363789558411   |
| node_33:<br>feature_name=cg15275017  | feature_id[5069].value ><br>threshold=0.4538573920726776  |
| node_51:<br>feature_name=cg07281938  | feature_id[351].value ><br>threshold=0.7506992518901825   |
| node_73:<br>feature_name=cg17524821  | feature_id[5626].value ><br>threshold=0.4504699558019638  |
| node_75:<br>feature_name=cg02973735  | feature_id[1677].value ><br>threshold=0.29383400082588196 |
| node_77:<br>feature_name=cg23345038  | feature_id[7002].value ><br>threshold=0.6255057156085968  |
| node_79:<br>feature_name=cg17537493  | feature_id[5630].value ><br>threshold=0.5825372636318207  |
| node_85:<br>feature_name=cg12948116  | feature_id[4375].value <=<br>threshold=0.5658791363239288 |
| node_86:<br>feature_name=cg06038180  | feature_id[2529].value ><br>threshold=0.43877437710762024 |
| node_88:<br>feature_name=cg15720017  | feature_id[5175].value ><br>threshold=0.7009969055652618  |
| node_90:<br>feature_name=cg13070215  | feature_id[314].value <=<br>threshold=0.14645694941282272 |
| node_91:<br>feature_name=cg01014262  | feature_id[1082].value <=<br>threshold=0.5737917125225067 |
| node_92:<br>feature_name=cg16863382  | feature_id[5471].value ><br>threshold=0.7200668156147003  |
| node_102:<br>feature_name=cg06633739 | feature_id[2686].value ><br>threshold=0.47115950286388397 |
| node_126:<br>feature_name=cg22946562 | feature_id[744].value ><br>threshold=0.6194809079170227   |
| node_170:<br>feature_name=cg12120430 | feature_id[4185].value ><br>threshold=0.5775820016860962  |
| node_172:<br>feature_name=cg02137970 | feature_id[1411].value ><br>threshold=0.6705857813358307  |
| node_196:<br>feature_name=cg03393445 | feature_id[1807].value ><br>threshold=0.4260125905275345  |
| node_218:<br>feature_name=cg23525541 | feature_id[7049].value ><br>threshold=0.4485483318567276  |
| node_222:<br>feature_name=cg10543634 | feature_id[3775].value ><br>threshold=0.29505227506160736 |
| node_224:<br>feature_name=cg07344990 | feature_id[2926].value ><br>threshold=0.5750180780887604  |

|                                      |                                                            |
|--------------------------------------|------------------------------------------------------------|
| node_226:<br>feature_name=cg10558233 | feature_id[3780].value <=<br>threshold=0.7217690348625183  |
| node_227:<br>feature_name=cg08097359 | feature_id[3116].value ><br>threshold=0.3598180413246155   |
| node_229:<br>feature_name=cg22737001 | feature_id[6843].value <=<br>threshold=0.46281898021698    |
| node_230:<br>feature_name=cg24276624 | feature_id[7242].value ><br>threshold=0.6169979274272919   |
| node_232:<br>feature_name=cg04026354 | feature_id[1982].value <=<br>threshold=0.42332448065280914 |
| node_233:<br>feature_name=cg06038180 | feature_id[2529].value ><br>threshold=0.6430551409721375   |
| node_235:<br>feature_name=cg14104252 | feature_id[4735].value ><br>threshold=0.5213949382305145   |
| node_239:<br>feature_name=cg06711298 | feature_id[2707].value ><br>threshold=0.36770085990428925  |
| node_241:<br>feature_name=cg11703722 | feature_id[4056].value <=<br>threshold=0.5125315636396408  |
| Class: muscle tissue (MUS)           |                                                            |
|                                      |                                                            |
| Rules_46                             | passed counts:8                                            |
| node_0:<br>feature_name=cg11915444   | feature_id[4116].value ><br>threshold=0.3402601182460785   |
| node_10:<br>feature_name=cg12109728  | feature_id[4182].value ><br>threshold=0.7068270146846771   |
| node_20:<br>feature_name=cg10844382  | feature_id[3856].value ><br>threshold=0.5988894104957581   |
| node_24:<br>feature_name=cg00631702  | feature_id[943].value <=<br>threshold=0.37470583617687225  |
| node_25:<br>feature_name=cg07912144  | feature_id[3075].value ><br>threshold=0.5578519105911255   |
| node_29:<br>feature_name=cg24407065  | feature_id[388].value ><br>threshold=0.5364363789558411    |
| node_33:<br>feature_name=cg15275017  | feature_id[5069].value ><br>threshold=0.4538573920726776   |
| node_51:<br>feature_name=cg07281938  | feature_id[351].value ><br>threshold=0.7506992518901825    |
| node_73:<br>feature_name=cg17524821  | feature_id[5626].value ><br>threshold=0.4504699558019638   |
| node_75:<br>feature_name=cg02973735  | feature_id[1677].value ><br>threshold=0.29383400082588196  |
| node_77:<br>feature_name=cg23345038  | feature_id[7002].value ><br>threshold=0.6255057156085968   |

|                                      |                                                            |
|--------------------------------------|------------------------------------------------------------|
| node_79:<br>feature_name=cg17537493  | feature_id[5630].value ><br>threshold=0.5825372636318207   |
| node_85:<br>feature_name=cg12948116  | feature_id[4375].value <=<br>threshold=0.5658791363239288  |
| node_86:<br>feature_name=cg06038180  | feature_id[2529].value ><br>threshold=0.43877437710762024  |
| node_88:<br>feature_name=cg15720017  | feature_id[5175].value ><br>threshold=0.7009969055652618   |
| node_90:<br>feature_name=cg13070215  | feature_id[314].value <=<br>threshold=0.14645694941282272  |
| node_91:<br>feature_name=cg01014262  | feature_id[1082].value <=<br>threshold=0.5737917125225067  |
| node_92:<br>feature_name=cg16863382  | feature_id[5471].value ><br>threshold=0.7200668156147003   |
| node_102:<br>feature_name=cg06633739 | feature_id[2686].value ><br>threshold=0.47115950286388397  |
| node_126:<br>feature_name=cg22946562 | feature_id[744].value ><br>threshold=0.6194809079170227    |
| node_170:<br>feature_name=cg12120430 | feature_id[4185].value ><br>threshold=0.5775820016860962   |
| node_172:<br>feature_name=cg02137970 | feature_id[1411].value ><br>threshold=0.6705857813358307   |
| node_196:<br>feature_name=cg03393445 | feature_id[1807].value ><br>threshold=0.4260125905275345   |
| node_218:<br>feature_name=cg23525541 | feature_id[7049].value ><br>threshold=0.4485483318567276   |
| node_222:<br>feature_name=cg10543634 | feature_id[3775].value ><br>threshold=0.29505227506160736  |
| node_224:<br>feature_name=cg07344990 | feature_id[2926].value ><br>threshold=0.5750180780887604   |
| node_226:<br>feature_name=cg10558233 | feature_id[3780].value <=<br>threshold=0.7217690348625183  |
| node_227:<br>feature_name=cg08097359 | feature_id[3116].value ><br>threshold=0.3598180413246155   |
| node_229:<br>feature_name=cg22737001 | feature_id[6843].value <=<br>threshold=0.46281898021698    |
| node_230:<br>feature_name=cg24276624 | feature_id[7242].value ><br>threshold=0.6169979274272919   |
| node_232:<br>feature_name=cg04026354 | feature_id[1982].value <=<br>threshold=0.42332448065280914 |
| node_233:<br>feature_name=cg06038180 | feature_id[2529].value ><br>threshold=0.6430551409721375   |
| node_235:<br>feature_name=cg14104252 | feature_id[4735].value ><br>threshold=0.5213949382305145   |

|                                                   |                                                            |
|---------------------------------------------------|------------------------------------------------------------|
| node_239:<br>feature_name=cg06711298              | feature_id[2707].value <=<br>threshold=0.36770085990428925 |
| Class: extraskeletal myxoid chondrosarcoma (EMCS) |                                                            |
| Rules_47                                          | passed counts:8                                            |
| node_0:<br>feature_name=cg11915444                | feature_id[4116].value ><br>threshold=0.3402601182460785   |
| node_10:<br>feature_name=cg12109728               | feature_id[4182].value ><br>threshold=0.7068270146846771   |
| node_20:<br>feature_name=cg10844382               | feature_id[3856].value ><br>threshold=0.5988894104957581   |
| node_24:<br>feature_name=cg00631702               | feature_id[943].value <=<br>threshold=0.37470583617687225  |
| node_25:<br>feature_name=cg07912144               | feature_id[3075].value ><br>threshold=0.5578519105911255   |
| node_29:<br>feature_name=cg24407065               | feature_id[388].value ><br>threshold=0.5364363789558411    |
| node_33:<br>feature_name=cg15275017               | feature_id[5069].value ><br>threshold=0.4538573920726776   |
| node_51:<br>feature_name=cg07281938               | feature_id[351].value ><br>threshold=0.7506992518901825    |
| node_73:<br>feature_name=cg17524821               | feature_id[5626].value ><br>threshold=0.4504699558019638   |
| node_75:<br>feature_name=cg02973735               | feature_id[1677].value ><br>threshold=0.29383400082588196  |
| node_77:<br>feature_name=cg23345038               | feature_id[7002].value ><br>threshold=0.6255057156085968   |
| node_79:<br>feature_name=cg17537493               | feature_id[5630].value ><br>threshold=0.5825372636318207   |
| node_85:<br>feature_name=cg12948116               | feature_id[4375].value <=<br>threshold=0.5658791363239288  |
| node_86:<br>feature_name=cg06038180               | feature_id[2529].value ><br>threshold=0.43877437710762024  |
| node_88:<br>feature_name=cg15720017               | feature_id[5175].value ><br>threshold=0.7009969055652618   |
| node_90:<br>feature_name=cg13070215               | feature_id[314].value <=<br>threshold=0.14645694941282272  |
| node_91:<br>feature_name=cg01014262               | feature_id[1082].value <=<br>threshold=0.5737917125225067  |
| node_92:<br>feature_name=cg16863382               | feature_id[5471].value ><br>threshold=0.7200668156147003   |
| node_102:<br>feature_name=cg06633739              | feature_id[2686].value ><br>threshold=0.47115950286388397  |

|                                      |                                                           |
|--------------------------------------|-----------------------------------------------------------|
| node_126:<br>feature_name=cg22946562 | feature_id[744].value <=<br>threshold=0.6194809079170227  |
| node_127:<br>feature_name=cg23920016 | feature_id[7139].value ><br>threshold=0.7449243068695068  |
| node_151:<br>feature_name=cg21617218 | feature_id[6608].value ><br>threshold=0.8795748353004456  |
| node_153:<br>feature_name=cg01663970 | feature_id[1273].value <=<br>threshold=0.8442256152629852 |
| Class: melanoma (MEL)                |                                                           |
|                                      |                                                           |
| Rules_48                             | passed counts:7                                           |
| node_0:<br>feature_name=cg11915444   | feature_id[4116].value ><br>threshold=0.3402601182460785  |
| node_10:<br>feature_name=cg12109728  | feature_id[4182].value ><br>threshold=0.7068270146846771  |
| node_20:<br>feature_name=cg10844382  | feature_id[3856].value ><br>threshold=0.5988894104957581  |
| node_24:<br>feature_name=cg00631702  | feature_id[943].value <=<br>threshold=0.37470583617687225 |
| node_25:<br>feature_name=cg07912144  | feature_id[3075].value ><br>threshold=0.5578519105911255  |
| node_29:<br>feature_name=cg24407065  | feature_id[388].value ><br>threshold=0.5364363789558411   |
| node_33:<br>feature_name=cg15275017  | feature_id[5069].value ><br>threshold=0.4538573920726776  |
| node_51:<br>feature_name=cg07281938  | feature_id[351].value ><br>threshold=0.7506992518901825   |
| node_73:<br>feature_name=cg17524821  | feature_id[5626].value ><br>threshold=0.4504699558019638  |
| node_75:<br>feature_name=cg02973735  | feature_id[1677].value ><br>threshold=0.29383400082588196 |
| node_77:<br>feature_name=cg23345038  | feature_id[7002].value ><br>threshold=0.6255057156085968  |
| node_79:<br>feature_name=cg17537493  | feature_id[5630].value ><br>threshold=0.5825372636318207  |
| node_85:<br>feature_name=cg12948116  | feature_id[4375].value <=<br>threshold=0.5658791363239288 |
| node_86:<br>feature_name=cg06038180  | feature_id[2529].value ><br>threshold=0.43877437710762024 |
| node_88:<br>feature_name=cg15720017  | feature_id[5175].value ><br>threshold=0.7009969055652618  |
| node_90:<br>feature_name=cg13070215  | feature_id[314].value <=<br>threshold=0.14645694941282272 |

|                                      |                                                            |
|--------------------------------------|------------------------------------------------------------|
| node_91:<br>feature_name=cg01014262  | feature_id[1082].value <=<br>threshold=0.5737917125225067  |
| node_92:<br>feature_name=cg16863382  | feature_id[5471].value ><br>threshold=0.7200668156147003   |
| node_102:<br>feature_name=cg06633739 | feature_id[2686].value ><br>threshold=0.47115950286388397  |
| node_126:<br>feature_name=cg22946562 | feature_id[744].value ><br>threshold=0.6194809079170227    |
| node_170:<br>feature_name=cg12120430 | feature_id[4185].value ><br>threshold=0.5775820016860962   |
| node_172:<br>feature_name=cg02137970 | feature_id[1411].value ><br>threshold=0.6705857813358307   |
| node_196:<br>feature_name=cg03393445 | feature_id[1807].value ><br>threshold=0.4260125905275345   |
| node_218:<br>feature_name=cg23525541 | feature_id[7049].value ><br>threshold=0.4485483318567276   |
| node_222:<br>feature_name=cg10543634 | feature_id[3775].value ><br>threshold=0.29505227506160736  |
| node_224:<br>feature_name=cg07344990 | feature_id[2926].value ><br>threshold=0.5750180780887604   |
| node_226:<br>feature_name=cg10558233 | feature_id[3780].value <=<br>threshold=0.7217690348625183  |
| node_227:<br>feature_name=cg08097359 | feature_id[3116].value ><br>threshold=0.3598180413246155   |
| node_229:<br>feature_name=cg22737001 | feature_id[6843].value <=<br>threshold=0.46281898021698    |
| node_230:<br>feature_name=cg24276624 | feature_id[7242].value ><br>threshold=0.6169979274272919   |
| node_232:<br>feature_name=cg04026354 | feature_id[1982].value <=<br>threshold=0.42332448065280914 |
| node_233:<br>feature_name=cg06038180 | feature_id[2529].value ><br>threshold=0.6430551409721375   |
| node_235:<br>feature_name=cg14104252 | feature_id[4735].value ><br>threshold=0.5213949382305145   |
| node_239:<br>feature_name=cg06711298 | feature_id[2707].value ><br>threshold=0.36770085990428925  |
| node_241:<br>feature_name=cg11703722 | feature_id[4056].value ><br>threshold=0.5125315636396408   |
| node_243:<br>feature_name=cg21230793 | feature_id[6514].value ><br>threshold=0.27807849645614624  |
| node_245:<br>feature_name=cg06225767 | feature_id[2575].value ><br>threshold=0.18034886568784714  |
| node_247:<br>feature_name=cg00941576 | feature_id[1053].value ><br>threshold=0.2476368322968483   |

|                                      |                                                           |
|--------------------------------------|-----------------------------------------------------------|
| node_249:<br>feature_name=cg10149889 | feature_id[3676].value ><br>threshold=0.633601188659668   |
| node_257:<br>feature_name=cg07608094 | feature_id[2999].value ><br>threshold=0.7820693254470825  |
| node_259:<br>feature_name=cg03315432 | feature_id[1783].value ><br>threshold=0.6790387332439423  |
| node_261:<br>feature_name=cg07894983 | feature_id[3070].value <=<br>threshold=0.3577418476343155 |
| Class: rhabdomyosarcoma (RMS)        |                                                           |
|                                      |                                                           |
| Rules_49                             | passed counts:7                                           |
| node_0:<br>feature_name=cg11915444   | feature_id[4116].value ><br>threshold=0.3402601182460785  |
| node_10:<br>feature_name=cg12109728  | feature_id[4182].value ><br>threshold=0.7068270146846771  |
| node_20:<br>feature_name=cg10844382  | feature_id[3856].value ><br>threshold=0.5988894104957581  |
| node_24:<br>feature_name=cg00631702  | feature_id[943].value <=<br>threshold=0.37470583617687225 |
| node_25:<br>feature_name=cg07912144  | feature_id[3075].value ><br>threshold=0.5578519105911255  |
| node_29:<br>feature_name=cg24407065  | feature_id[388].value ><br>threshold=0.5364363789558411   |
| node_33:<br>feature_name=cg15275017  | feature_id[5069].value ><br>threshold=0.4538573920726776  |
| node_51:<br>feature_name=cg07281938  | feature_id[351].value ><br>threshold=0.7506992518901825   |
| node_73:<br>feature_name=cg17524821  | feature_id[5626].value ><br>threshold=0.4504699558019638  |
| node_75:<br>feature_name=cg02973735  | feature_id[1677].value ><br>threshold=0.29383400082588196 |
| node_77:<br>feature_name=cg23345038  | feature_id[7002].value ><br>threshold=0.6255057156085968  |
| node_79:<br>feature_name=cg17537493  | feature_id[5630].value ><br>threshold=0.5825372636318207  |
| node_85:<br>feature_name=cg12948116  | feature_id[4375].value <=<br>threshold=0.5658791363239288 |
| node_86:<br>feature_name=cg06038180  | feature_id[2529].value ><br>threshold=0.43877437710762024 |
| node_88:<br>feature_name=cg15720017  | feature_id[5175].value ><br>threshold=0.7009969055652618  |
| node_90:<br>feature_name=cg13070215  | feature_id[314].value <=<br>threshold=0.14645694941282272 |



|                                      |                                                            |
|--------------------------------------|------------------------------------------------------------|
| node_91:<br>feature_name=cg01014262  | feature_id[1082].value <=<br>threshold=0.5737917125225067  |
| node_92:<br>feature_name=cg16863382  | feature_id[5471].value ><br>threshold=0.7200668156147003   |
| node_102:<br>feature_name=cg06633739 | feature_id[2686].value ><br>threshold=0.47115950286388397  |
| node_126:<br>feature_name=cg22946562 | feature_id[744].value ><br>threshold=0.6194809079170227    |
| node_170:<br>feature_name=cg12120430 | feature_id[4185].value ><br>threshold=0.5775820016860962   |
| node_172:<br>feature_name=cg02137970 | feature_id[1411].value ><br>threshold=0.6705857813358307   |
| node_196:<br>feature_name=cg03393445 | feature_id[1807].value ><br>threshold=0.4260125905275345   |
| node_218:<br>feature_name=cg23525541 | feature_id[7049].value ><br>threshold=0.4485483318567276   |
| node_222:<br>feature_name=cg10543634 | feature_id[3775].value ><br>threshold=0.29505227506160736  |
| node_224:<br>feature_name=cg07344990 | feature_id[2926].value ><br>threshold=0.5750180780887604   |
| node_226:<br>feature_name=cg10558233 | feature_id[3780].value <=<br>threshold=0.7217690348625183  |
| node_227:<br>feature_name=cg08097359 | feature_id[3116].value ><br>threshold=0.3598180413246155   |
| node_229:<br>feature_name=cg22737001 | feature_id[6843].value <=<br>threshold=0.46281898021698    |
| node_230:<br>feature_name=cg24276624 | feature_id[7242].value ><br>threshold=0.6169979274272919   |
| node_232:<br>feature_name=cg04026354 | feature_id[1982].value <=<br>threshold=0.42332448065280914 |
| node_233:<br>feature_name=cg06038180 | feature_id[2529].value ><br>threshold=0.6430551409721375   |
| node_235:<br>feature_name=cg14104252 | feature_id[4735].value ><br>threshold=0.5213949382305145   |
| node_239:<br>feature_name=cg06711298 | feature_id[2707].value ><br>threshold=0.36770085990428925  |
| node_241:<br>feature_name=cg11703722 | feature_id[4056].value ><br>threshold=0.5125315636396408   |
| node_243:<br>feature_name=cg21230793 | feature_id[6514].value ><br>threshold=0.27807849645614624  |
| node_245:<br>feature_name=cg06225767 | feature_id[2575].value ><br>threshold=0.18034886568784714  |
| node_247:<br>feature_name=cg00941576 | feature_id[1053].value ><br>threshold=0.2476368322968483   |

|                                                 |                                                           |
|-------------------------------------------------|-----------------------------------------------------------|
| node_249:<br>feature_name=cg10149889            | feature_id[3676].value ><br>threshold=0.633601188659668   |
| node_257:<br>feature_name=cg07608094            | feature_id[2999].value ><br>threshold=0.7820693254470825  |
| node_259:<br>feature_name=cg03315432            | feature_id[1783].value <=<br>threshold=0.6790387332439423 |
| Class: sclerosing epithelioid fibrosarcoma(SEF) |                                                           |
|                                                 |                                                           |
| Rules_50                                        | passed counts:7                                           |
| node_0:<br>feature_name=cg11915444              | feature_id[4116].value ><br>threshold=0.3402601182460785  |
| node_10:<br>feature_name=cg12109728             | feature_id[4182].value ><br>threshold=0.7068270146846771  |
| node_20:<br>feature_name=cg10844382             | feature_id[3856].value ><br>threshold=0.5988894104957581  |
| node_24:<br>feature_name=cg00631702             | feature_id[943].value <=<br>threshold=0.37470583617687225 |
| node_25:<br>feature_name=cg07912144             | feature_id[3075].value ><br>threshold=0.5578519105911255  |
| node_29:<br>feature_name=cg24407065             | feature_id[388].value ><br>threshold=0.5364363789558411   |
| node_33:<br>feature_name=cg15275017             | feature_id[5069].value ><br>threshold=0.4538573920726776  |
| node_51:<br>feature_name=cg07281938             | feature_id[351].value ><br>threshold=0.7506992518901825   |
| node_73:<br>feature_name=cg17524821             | feature_id[5626].value ><br>threshold=0.4504699558019638  |
| node_75:<br>feature_name=cg02973735             | feature_id[1677].value ><br>threshold=0.29383400082588196 |
| node_77:<br>feature_name=cg23345038             | feature_id[7002].value ><br>threshold=0.6255057156085968  |
| node_79:<br>feature_name=cg17537493             | feature_id[5630].value ><br>threshold=0.5825372636318207  |
| node_85:<br>feature_name=cg12948116             | feature_id[4375].value <=<br>threshold=0.5658791363239288 |
| node_86:<br>feature_name=cg06038180             | feature_id[2529].value ><br>threshold=0.43877437710762024 |
| node_88:<br>feature_name=cg15720017             | feature_id[5175].value ><br>threshold=0.7009969055652618  |
| node_90:<br>feature_name=cg13070215             | feature_id[314].value <=<br>threshold=0.14645694941282272 |
| node_91:<br>feature_name=cg01014262             | feature_id[1082].value <=<br>threshold=0.5737917125225067 |

|                                      |                                                            |
|--------------------------------------|------------------------------------------------------------|
| node_92:<br>feature_name=cg16863382  | feature_id[5471].value ><br>threshold=0.7200668156147003   |
| node_102:<br>feature_name=cg06633739 | feature_id[2686].value ><br>threshold=0.47115950286388397  |
| node_126:<br>feature_name=cg22946562 | feature_id[744].value ><br>threshold=0.6194809079170227    |
| node_170:<br>feature_name=cg12120430 | feature_id[4185].value ><br>threshold=0.5775820016860962   |
| node_172:<br>feature_name=cg02137970 | feature_id[1411].value ><br>threshold=0.6705857813358307   |
| node_196:<br>feature_name=cg03393445 | feature_id[1807].value ><br>threshold=0.4260125905275345   |
| node_218:<br>feature_name=cg23525541 | feature_id[7049].value ><br>threshold=0.4485483318567276   |
| node_222:<br>feature_name=cg10543634 | feature_id[3775].value ><br>threshold=0.29505227506160736  |
| node_224:<br>feature_name=cg07344990 | feature_id[2926].value ><br>threshold=0.5750180780887604   |
| node_226:<br>feature_name=cg10558233 | feature_id[3780].value <=<br>threshold=0.7217690348625183  |
| node_227:<br>feature_name=cg08097359 | feature_id[3116].value ><br>threshold=0.3598180413246155   |
| node_229:<br>feature_name=cg22737001 | feature_id[6843].value <=<br>threshold=0.46281898021698    |
| node_230:<br>feature_name=cg24276624 | feature_id[7242].value ><br>threshold=0.6169979274272919   |
| node_232:<br>feature_name=cg04026354 | feature_id[1982].value <=<br>threshold=0.42332448065280914 |
| node_233:<br>feature_name=cg06038180 | feature_id[2529].value ><br>threshold=0.6430551409721375   |
| node_235:<br>feature_name=cg14104252 | feature_id[4735].value ><br>threshold=0.5213949382305145   |
| node_239:<br>feature_name=cg06711298 | feature_id[2707].value ><br>threshold=0.36770085990428925  |
| node_241:<br>feature_name=cg11703722 | feature_id[4056].value ><br>threshold=0.5125315636396408   |
| node_243:<br>feature_name=cg21230793 | feature_id[6514].value ><br>threshold=0.27807849645614624  |
| node_245:<br>feature_name=cg06225767 | feature_id[2575].value ><br>threshold=0.18034886568784714  |
| node_247:<br>feature_name=cg00941576 | feature_id[1053].value ><br>threshold=0.2476368322968483   |
| node_249:<br>feature_name=cg10149889 | feature_id[3676].value ><br>threshold=0.633601188659668    |

|                                            |                                                           |
|--------------------------------------------|-----------------------------------------------------------|
| node_257:<br>feature_name=cg07608094       | feature_id[2999].value <=<br>threshold=0.7820693254470825 |
| Class: plexiform neurofibroma (NFB (PLEX)) |                                                           |
|                                            |                                                           |
| Rules_51                                   | passed counts:7                                           |
| node_0:<br>feature_name=cg11915444         | feature_id[4116].value ><br>threshold=0.3402601182460785  |
| node_10:<br>feature_name=cg12109728        | feature_id[4182].value ><br>threshold=0.7068270146846771  |
| node_20:<br>feature_name=cg10844382        | feature_id[3856].value ><br>threshold=0.5988894104957581  |
| node_24:<br>feature_name=cg00631702        | feature_id[943].value <=<br>threshold=0.37470583617687225 |
| node_25:<br>feature_name=cg07912144        | feature_id[3075].value ><br>threshold=0.5578519105911255  |
| node_29:<br>feature_name=cg24407065        | feature_id[388].value ><br>threshold=0.5364363789558411   |
| node_33:<br>feature_name=cg15275017        | feature_id[5069].value ><br>threshold=0.4538573920726776  |
| node_51:<br>feature_name=cg07281938        | feature_id[351].value ><br>threshold=0.7506992518901825   |
| node_73:<br>feature_name=cg17524821        | feature_id[5626].value ><br>threshold=0.4504699558019638  |
| node_75:<br>feature_name=cg02973735        | feature_id[1677].value ><br>threshold=0.29383400082588196 |
| node_77:<br>feature_name=cg23345038        | feature_id[7002].value ><br>threshold=0.6255057156085968  |
| node_79:<br>feature_name=cg17537493        | feature_id[5630].value ><br>threshold=0.5825372636318207  |
| node_85:<br>feature_name=cg12948116        | feature_id[4375].value <=<br>threshold=0.5658791363239288 |
| node_86:<br>feature_name=cg06038180        | feature_id[2529].value ><br>threshold=0.43877437710762024 |
| node_88:<br>feature_name=cg15720017        | feature_id[5175].value ><br>threshold=0.7009969055652618  |
| node_90:<br>feature_name=cg13070215        | feature_id[314].value <=<br>threshold=0.14645694941282272 |
| node_91:<br>feature_name=cg01014262        | feature_id[1082].value <=<br>threshold=0.5737917125225067 |
| node_92:<br>feature_name=cg16863382        | feature_id[5471].value ><br>threshold=0.7200668156147003  |
| node_102:<br>feature_name=cg06633739       | feature_id[2686].value ><br>threshold=0.47115950286388397 |

|                                         |                                                           |
|-----------------------------------------|-----------------------------------------------------------|
| node_126:<br>feature_name=cg22946562    | feature_id[744].value ><br>threshold=0.6194809079170227   |
| node_170:<br>feature_name=cg12120430    | feature_id[4185].value ><br>threshold=0.5775820016860962  |
| node_172:<br>feature_name=cg02137970    | feature_id[1411].value <=<br>threshold=0.6705857813358307 |
| node_173:<br>feature_name=cg16185457    | feature_id[5282].value <=<br>threshold=0.5055856853723526 |
| node_174:<br>feature_name=cg09040552    | feature_id[3370].value ><br>threshold=0.596051037311554   |
| node_176:<br>feature_name=cg12064373    | feature_id[4162].value ><br>threshold=0.10608945414423943 |
| Class: undifferentiated sarcoma (USARC) |                                                           |
|                                         |                                                           |
| Rules_52                                | passed counts:7                                           |
| node_0:<br>feature_name=cg11915444      | feature_id[4116].value ><br>threshold=0.3402601182460785  |
| node_10:<br>feature_name=cg12109728     | feature_id[4182].value ><br>threshold=0.7068270146846771  |
| node_20:<br>feature_name=cg10844382     | feature_id[3856].value ><br>threshold=0.5988894104957581  |
| node_24:<br>feature_name=cg00631702     | feature_id[943].value <=<br>threshold=0.37470583617687225 |
| node_25:<br>feature_name=cg07912144     | feature_id[3075].value ><br>threshold=0.5578519105911255  |
| node_29:<br>feature_name=cg24407065     | feature_id[388].value ><br>threshold=0.5364363789558411   |
| node_33:<br>feature_name=cg15275017     | feature_id[5069].value ><br>threshold=0.4538573920726776  |
| node_51:<br>feature_name=cg07281938     | feature_id[351].value ><br>threshold=0.7506992518901825   |
| node_73:<br>feature_name=cg17524821     | feature_id[5626].value ><br>threshold=0.4504699558019638  |
| node_75:<br>feature_name=cg02973735     | feature_id[1677].value ><br>threshold=0.29383400082588196 |
| node_77:<br>feature_name=cg23345038     | feature_id[7002].value ><br>threshold=0.6255057156085968  |
| node_79:<br>feature_name=cg17537493     | feature_id[5630].value ><br>threshold=0.5825372636318207  |
| node_85:<br>feature_name=cg12948116     | feature_id[4375].value <=<br>threshold=0.5658791363239288 |
| node_86:<br>feature_name=cg06038180     | feature_id[2529].value ><br>threshold=0.43877437710762024 |

|                                      |                                                            |
|--------------------------------------|------------------------------------------------------------|
| node_88:<br>feature_name=cg15720017  | feature_id[5175].value ><br>threshold=0.7009969055652618   |
| node_90:<br>feature_name=cg13070215  | feature_id[314].value <=<br>threshold=0.14645694941282272  |
| node_91:<br>feature_name=cg01014262  | feature_id[1082].value <=<br>threshold=0.5737917125225067  |
| node_92:<br>feature_name=cg16863382  | feature_id[5471].value ><br>threshold=0.7200668156147003   |
| node_102:<br>feature_name=cg06633739 | feature_id[2686].value ><br>threshold=0.47115950286388397  |
| node_126:<br>feature_name=cg22946562 | feature_id[744].value ><br>threshold=0.6194809079170227    |
| node_170:<br>feature_name=cg12120430 | feature_id[4185].value ><br>threshold=0.5775820016860962   |
| node_172:<br>feature_name=cg02137970 | feature_id[1411].value <=<br>threshold=0.6705857813358307  |
| node_173:<br>feature_name=cg16185457 | feature_id[5282].value <=<br>threshold=0.5055856853723526  |
| node_174:<br>feature_name=cg09040552 | feature_id[3370].value ><br>threshold=0.596051037311554    |
| node_176:<br>feature_name=cg12064373 | feature_id[4162].value <=<br>threshold=0.10608945414423943 |
| node_177:<br>feature_name=cg04874782 | feature_id[2203].value ><br>threshold=0.24745557457208633  |
| Class: myositis proliferans (MP)     |                                                            |
|                                      |                                                            |
| Rules_53                             | passed counts:7                                            |
| node_0:<br>feature_name=cg11915444   | feature_id[4116].value ><br>threshold=0.3402601182460785   |
| node_10:<br>feature_name=cg12109728  | feature_id[4182].value ><br>threshold=0.7068270146846771   |
| node_20:<br>feature_name=cg10844382  | feature_id[3856].value ><br>threshold=0.5988894104957581   |
| node_24:<br>feature_name=cg00631702  | feature_id[943].value <=<br>threshold=0.37470583617687225  |
| node_25:<br>feature_name=cg07912144  | feature_id[3075].value ><br>threshold=0.5578519105911255   |
| node_29:<br>feature_name=cg24407065  | feature_id[388].value ><br>threshold=0.5364363789558411    |
| node_33:<br>feature_name=cg15275017  | feature_id[5069].value ><br>threshold=0.4538573920726776   |
| node_51:<br>feature_name=cg07281938  | feature_id[351].value ><br>threshold=0.7506992518901825    |

|                                      |                                                            |
|--------------------------------------|------------------------------------------------------------|
| node_73:<br>feature_name=cg17524821  | feature_id[5626].value ><br>threshold=0.4504699558019638   |
| node_75:<br>feature_name=cg02973735  | feature_id[1677].value ><br>threshold=0.29383400082588196  |
| node_77:<br>feature_name=cg23345038  | feature_id[7002].value ><br>threshold=0.6255057156085968   |
| node_79:<br>feature_name=cg17537493  | feature_id[5630].value ><br>threshold=0.5825372636318207   |
| node_85:<br>feature_name=cg12948116  | feature_id[4375].value <=<br>threshold=0.5658791363239288  |
| node_86:<br>feature_name=cg06038180  | feature_id[2529].value ><br>threshold=0.43877437710762024  |
| node_88:<br>feature_name=cg15720017  | feature_id[5175].value ><br>threshold=0.7009969055652618   |
| node_90:<br>feature_name=cg13070215  | feature_id[314].value <=<br>threshold=0.14645694941282272  |
| node_91:<br>feature_name=cg01014262  | feature_id[1082].value <=<br>threshold=0.5737917125225067  |
| node_92:<br>feature_name=cg16863382  | feature_id[5471].value ><br>threshold=0.7200668156147003   |
| node_102:<br>feature_name=cg06633739 | feature_id[2686].value <=<br>threshold=0.47115950286388397 |
| node_103:<br>feature_name=cg03861097 | feature_id[1943].value <=<br>threshold=0.24196631461381912 |
| node_104:<br>feature_name=cg05145297 | feature_id[2285].value <=<br>threshold=0.5227190256118774  |
| Class: sarcoma (SARC)                |                                                            |
|                                      |                                                            |
| Rules_54                             | passed counts:7                                            |
| node_0:<br>feature_name=cg11915444   | feature_id[4116].value ><br>threshold=0.3402601182460785   |
| node_10:<br>feature_name=cg12109728  | feature_id[4182].value ><br>threshold=0.7068270146846771   |
| node_20:<br>feature_name=cg10844382  | feature_id[3856].value ><br>threshold=0.5988894104957581   |
| node_24:<br>feature_name=cg00631702  | feature_id[943].value <=<br>threshold=0.37470583617687225  |
| node_25:<br>feature_name=cg07912144  | feature_id[3075].value ><br>threshold=0.5578519105911255   |
| node_29:<br>feature_name=cg24407065  | feature_id[388].value ><br>threshold=0.5364363789558411    |
| node_33:<br>feature_name=cg15275017  | feature_id[5069].value ><br>threshold=0.4538573920726776   |

|                                               |                                                           |
|-----------------------------------------------|-----------------------------------------------------------|
| node_51:<br>feature_name=cg07281938           | feature_id[351].value <=<br>threshold=0.7506992518901825  |
| node_52:<br>feature_name=cg21189849           | feature_id[6504].value ><br>threshold=0.7545044124126434  |
| node_58:<br>feature_name=cg02867857           | feature_id[1644].value <=<br>threshold=0.5450765490531921 |
| Class: mesenchymal chondrosarcoma (CSA (MES)) |                                                           |
|                                               |                                                           |
| Rules_55                                      | passed counts:7                                           |
| node_0:<br>feature_name=cg11915444            | feature_id[4116].value ><br>threshold=0.3402601182460785  |
| node_10:<br>feature_name=cg12109728           | feature_id[4182].value ><br>threshold=0.7068270146846771  |
| node_20:<br>feature_name=cg10844382           | feature_id[3856].value ><br>threshold=0.5988894104957581  |
| node_24:<br>feature_name=cg00631702           | feature_id[943].value <=<br>threshold=0.37470583617687225 |
| node_25:<br>feature_name=cg07912144           | feature_id[3075].value ><br>threshold=0.5578519105911255  |
| node_29:<br>feature_name=cg24407065           | feature_id[388].value ><br>threshold=0.5364363789558411   |
| node_33:<br>feature_name=cg15275017           | feature_id[5069].value <=<br>threshold=0.4538573920726776 |
| node_34:<br>feature_name=cg08236537           | feature_id[3160].value <=<br>threshold=0.4830351173877716 |
| node_35:<br>feature_name=cg21591452           | feature_id[6603].value ><br>threshold=0.878025621175766   |
| Class: leiomyoma (LMO)                        |                                                           |
|                                               |                                                           |
| Rules_56                                      | passed counts:6                                           |
| node_0:<br>feature_name=cg11915444            | feature_id[4116].value ><br>threshold=0.3402601182460785  |
| node_10:<br>feature_name=cg12109728           | feature_id[4182].value ><br>threshold=0.7068270146846771  |
| node_20:<br>feature_name=cg10844382           | feature_id[3856].value ><br>threshold=0.5988894104957581  |
| node_24:<br>feature_name=cg00631702           | feature_id[943].value <=<br>threshold=0.37470583617687225 |
| node_25:<br>feature_name=cg07912144           | feature_id[3075].value ><br>threshold=0.5578519105911255  |
| node_29:<br>feature_name=cg24407065           | feature_id[388].value ><br>threshold=0.5364363789558411   |



|                                      |                                                           |
|--------------------------------------|-----------------------------------------------------------|
| node_33:<br>feature_name=cg15275017  | feature_id[5069].value ><br>threshold=0.4538573920726776  |
| node_51:<br>feature_name=cg07281938  | feature_id[351].value ><br>threshold=0.7506992518901825   |
| node_73:<br>feature_name=cg17524821  | feature_id[5626].value ><br>threshold=0.4504699558019638  |
| node_75:<br>feature_name=cg02973735  | feature_id[1677].value ><br>threshold=0.29383400082588196 |
| node_77:<br>feature_name=cg23345038  | feature_id[7002].value ><br>threshold=0.6255057156085968  |
| node_79:<br>feature_name=cg17537493  | feature_id[5630].value ><br>threshold=0.5825372636318207  |
| node_85:<br>feature_name=cg12948116  | feature_id[4375].value <=<br>threshold=0.5658791363239288 |
| node_86:<br>feature_name=cg06038180  | feature_id[2529].value ><br>threshold=0.43877437710762024 |
| node_88:<br>feature_name=cg15720017  | feature_id[5175].value ><br>threshold=0.7009969055652618  |
| node_90:<br>feature_name=cg13070215  | feature_id[314].value <=<br>threshold=0.14645694941282272 |
| node_91:<br>feature_name=cg01014262  | feature_id[1082].value <=<br>threshold=0.5737917125225067 |
| node_92:<br>feature_name=cg16863382  | feature_id[5471].value ><br>threshold=0.7200668156147003  |
| node_102:<br>feature_name=cg06633739 | feature_id[2686].value ><br>threshold=0.47115950286388397 |
| node_126:<br>feature_name=cg22946562 | feature_id[744].value ><br>threshold=0.6194809079170227   |
| node_170:<br>feature_name=cg12120430 | feature_id[4185].value ><br>threshold=0.5775820016860962  |
| node_172:<br>feature_name=cg02137970 | feature_id[1411].value ><br>threshold=0.6705857813358307  |
| node_196:<br>feature_name=cg03393445 | feature_id[1807].value ><br>threshold=0.4260125905275345  |
| node_218:<br>feature_name=cg23525541 | feature_id[7049].value ><br>threshold=0.4485483318567276  |
| node_222:<br>feature_name=cg10543634 | feature_id[3775].value ><br>threshold=0.29505227506160736 |
| node_224:<br>feature_name=cg07344990 | feature_id[2926].value ><br>threshold=0.5750180780887604  |
| node_226:<br>feature_name=cg10558233 | feature_id[3780].value <=<br>threshold=0.7217690348625183 |
| node_227:<br>feature_name=cg08097359 | feature_id[3116].value ><br>threshold=0.3598180413246155  |

|                                               |                                                            |
|-----------------------------------------------|------------------------------------------------------------|
| node_229:<br>feature_name=cg22737001          | feature_id[6843].value <=<br>threshold=0.46281898021698    |
| node_230:<br>feature_name=cg24276624          | feature_id[7242].value ><br>threshold=0.6169979274272919   |
| node_232:<br>feature_name=cg04026354          | feature_id[1982].value <=<br>threshold=0.42332448065280914 |
| node_233:<br>feature_name=cg06038180          | feature_id[2529].value ><br>threshold=0.6430551409721375   |
| node_235:<br>feature_name=cg14104252          | feature_id[4735].value ><br>threshold=0.5213949382305145   |
| node_239:<br>feature_name=cg06711298          | feature_id[2707].value ><br>threshold=0.36770085990428925  |
| node_241:<br>feature_name=cg11703722          | feature_id[4056].value ><br>threshold=0.5125315636396408   |
| node_243:<br>feature_name=cg21230793          | feature_id[6514].value ><br>threshold=0.27807849645614624  |
| node_245:<br>feature_name=cg06225767          | feature_id[2575].value ><br>threshold=0.18034886568784714  |
| node_247:<br>feature_name=cg00941576          | feature_id[1053].value ><br>threshold=0.2476368322968483   |
| node_249:<br>feature_name=cg10149889          | feature_id[3676].value ><br>threshold=0.633601188659668    |
| node_257:<br>feature_name=cg07608094          | feature_id[2999].value ><br>threshold=0.7820693254470825   |
| node_259:<br>feature_name=cg03315432          | feature_id[1783].value ><br>threshold=0.6790387332439423   |
| node_261:<br>feature_name=cg07894983          | feature_id[3070].value ><br>threshold=0.3577418476343155   |
| node_263:<br>feature_name=cg15646741          | feature_id[5160].value ><br>threshold=0.2826688587665558   |
| node_273:<br>feature_name=cg09701233          | feature_id[3546].value <=<br>threshold=0.5189756155014038  |
| Class: embryonal rhabdomyosarcoma (RMS (EMB)) |                                                            |
|                                               |                                                            |
| Rules_57                                      | passed counts:6                                            |
| node_0:<br>feature_name=cg11915444            | feature_id[4116].value ><br>threshold=0.3402601182460785   |
| node_10:<br>feature_name=cg12109728           | feature_id[4182].value ><br>threshold=0.7068270146846771   |
| node_20:<br>feature_name=cg10844382           | feature_id[3856].value ><br>threshold=0.5988894104957581   |
| node_24:<br>feature_name=cg00631702           | feature_id[943].value <=<br>threshold=0.37470583617687225  |

|                                      |                                                           |
|--------------------------------------|-----------------------------------------------------------|
| node_25:<br>feature_name=cg07912144  | feature_id[3075].value ><br>threshold=0.5578519105911255  |
| node_29:<br>feature_name=cg24407065  | feature_id[388].value ><br>threshold=0.5364363789558411   |
| node_33:<br>feature_name=cg15275017  | feature_id[5069].value ><br>threshold=0.4538573920726776  |
| node_51:<br>feature_name=cg07281938  | feature_id[351].value ><br>threshold=0.7506992518901825   |
| node_73:<br>feature_name=cg17524821  | feature_id[5626].value ><br>threshold=0.4504699558019638  |
| node_75:<br>feature_name=cg02973735  | feature_id[1677].value ><br>threshold=0.29383400082588196 |
| node_77:<br>feature_name=cg23345038  | feature_id[7002].value ><br>threshold=0.6255057156085968  |
| node_79:<br>feature_name=cg17537493  | feature_id[5630].value ><br>threshold=0.5825372636318207  |
| node_85:<br>feature_name=cg12948116  | feature_id[4375].value <=<br>threshold=0.5658791363239288 |
| node_86:<br>feature_name=cg06038180  | feature_id[2529].value ><br>threshold=0.43877437710762024 |
| node_88:<br>feature_name=cg15720017  | feature_id[5175].value ><br>threshold=0.7009969055652618  |
| node_90:<br>feature_name=cg13070215  | feature_id[314].value <=<br>threshold=0.14645694941282272 |
| node_91:<br>feature_name=cg01014262  | feature_id[1082].value <=<br>threshold=0.5737917125225067 |
| node_92:<br>feature_name=cg16863382  | feature_id[5471].value ><br>threshold=0.7200668156147003  |
| node_102:<br>feature_name=cg06633739 | feature_id[2686].value ><br>threshold=0.47115950286388397 |
| node_126:<br>feature_name=cg22946562 | feature_id[744].value ><br>threshold=0.6194809079170227   |
| node_170:<br>feature_name=cg12120430 | feature_id[4185].value ><br>threshold=0.5775820016860962  |
| node_172:<br>feature_name=cg02137970 | feature_id[1411].value <=<br>threshold=0.6705857813358307 |
| node_173:<br>feature_name=cg16185457 | feature_id[5282].value ><br>threshold=0.5055856853723526  |
| node_183:<br>feature_name=cg04993279 | feature_id[2243].value ><br>threshold=0.46021124720573425 |
| node_191:<br>feature_name=cg09043524 | feature_id[3372].value ><br>threshold=0.7900851368904114  |
| Class: lipoma (LIPO)                 |                                                           |

|                                     |                                                           |
|-------------------------------------|-----------------------------------------------------------|
|                                     |                                                           |
| Rules_58                            | passed counts:6                                           |
| node_0:<br>feature_name=cg11915444  | feature_id[4116].value ><br>threshold=0.3402601182460785  |
| node_10:<br>feature_name=cg12109728 | feature_id[4182].value ><br>threshold=0.7068270146846771  |
| node_20:<br>feature_name=cg10844382 | feature_id[3856].value ><br>threshold=0.5988894104957581  |
| node_24:<br>feature_name=cg00631702 | feature_id[943].value <=<br>threshold=0.37470583617687225 |
| node_25:<br>feature_name=cg07912144 | feature_id[3075].value ><br>threshold=0.5578519105911255  |
| node_29:<br>feature_name=cg24407065 | feature_id[388].value ><br>threshold=0.5364363789558411   |
| node_33:<br>feature_name=cg15275017 | feature_id[5069].value ><br>threshold=0.4538573920726776  |
| node_51:<br>feature_name=cg07281938 | feature_id[351].value <=<br>threshold=0.7506992518901825  |
| node_52:<br>feature_name=cg21189849 | feature_id[6504].value ><br>threshold=0.7545044124126434  |
| node_58:<br>feature_name=cg02867857 | feature_id[1644].value ><br>threshold=0.5450765490531921  |
| node_60:<br>feature_name=cg00863893 | feature_id[1017].value ><br>threshold=0.5313664376735687  |
| Class: chordoma (CHORD)             |                                                           |
|                                     |                                                           |
| Rules_59                            | passed counts:6                                           |
| node_0:<br>feature_name=cg11915444  | feature_id[4116].value ><br>threshold=0.3402601182460785  |
| node_10:<br>feature_name=cg12109728 | feature_id[4182].value ><br>threshold=0.7068270146846771  |
| node_20:<br>feature_name=cg10844382 | feature_id[3856].value ><br>threshold=0.5988894104957581  |
| node_24:<br>feature_name=cg00631702 | feature_id[943].value <=<br>threshold=0.37470583617687225 |
| node_25:<br>feature_name=cg07912144 | feature_id[3075].value ><br>threshold=0.5578519105911255  |
| node_29:<br>feature_name=cg24407065 | feature_id[388].value ><br>threshold=0.5364363789558411   |
| node_33:<br>feature_name=cg15275017 | feature_id[5069].value <=<br>threshold=0.4538573920726776 |
| node_34:<br>feature_name=cg08236537 | feature_id[3160].value <=<br>threshold=0.4830351173877716 |

|                                                         |                                                           |
|---------------------------------------------------------|-----------------------------------------------------------|
| node_35:<br>feature_name=cg21591452                     | feature_id[6603].value <=<br>threshold=0.878025621175766  |
| node_36:<br>feature_name=cg07368061                     | feature_id[2933].value ><br>threshold=0.6850627958774567  |
| Class: low-grade endometrial stromal sarcoma (ESS (LG)) |                                                           |
|                                                         |                                                           |
| Rules_60                                                | passed counts:5                                           |
| node_0:<br>feature_name=cg11915444                      | feature_id[4116].value ><br>threshold=0.3402601182460785  |
| node_10:<br>feature_name=cg12109728                     | feature_id[4182].value ><br>threshold=0.7068270146846771  |
| node_20:<br>feature_name=cg10844382                     | feature_id[3856].value ><br>threshold=0.5988894104957581  |
| node_24:<br>feature_name=cg00631702                     | feature_id[943].value <=<br>threshold=0.37470583617687225 |
| node_25:<br>feature_name=cg07912144                     | feature_id[3075].value ><br>threshold=0.5578519105911255  |
| node_29:<br>feature_name=cg24407065                     | feature_id[388].value ><br>threshold=0.5364363789558411   |
| node_33:<br>feature_name=cg15275017                     | feature_id[5069].value ><br>threshold=0.4538573920726776  |
| node_51:<br>feature_name=cg07281938                     | feature_id[351].value ><br>threshold=0.7506992518901825   |
| node_73:<br>feature_name=cg17524821                     | feature_id[5626].value ><br>threshold=0.4504699558019638  |
| node_75:<br>feature_name=cg02973735                     | feature_id[1677].value ><br>threshold=0.29383400082588196 |
| node_77:<br>feature_name=cg23345038                     | feature_id[7002].value ><br>threshold=0.6255057156085968  |
| node_79:<br>feature_name=cg17537493                     | feature_id[5630].value ><br>threshold=0.5825372636318207  |
| node_85:<br>feature_name=cg12948116                     | feature_id[4375].value <=<br>threshold=0.5658791363239288 |
| node_86:<br>feature_name=cg06038180                     | feature_id[2529].value ><br>threshold=0.43877437710762024 |
| node_88:<br>feature_name=cg15720017                     | feature_id[5175].value ><br>threshold=0.7009969055652618  |
| node_90:<br>feature_name=cg13070215                     | feature_id[314].value <=<br>threshold=0.14645694941282272 |
| node_91:<br>feature_name=cg01014262                     | feature_id[1082].value <=<br>threshold=0.5737917125225067 |
| node_92:<br>feature_name=cg16863382                     | feature_id[5471].value ><br>threshold=0.7200668156147003  |

|                                      |                                                            |
|--------------------------------------|------------------------------------------------------------|
| node_102:<br>feature_name=cg06633739 | feature_id[2686].value ><br>threshold=0.47115950286388397  |
| node_126:<br>feature_name=cg22946562 | feature_id[744].value ><br>threshold=0.6194809079170227    |
| node_170:<br>feature_name=cg12120430 | feature_id[4185].value ><br>threshold=0.5775820016860962   |
| node_172:<br>feature_name=cg02137970 | feature_id[1411].value ><br>threshold=0.6705857813358307   |
| node_196:<br>feature_name=cg03393445 | feature_id[1807].value ><br>threshold=0.4260125905275345   |
| node_218:<br>feature_name=cg23525541 | feature_id[7049].value ><br>threshold=0.4485483318567276   |
| node_222:<br>feature_name=cg10543634 | feature_id[3775].value ><br>threshold=0.29505227506160736  |
| node_224:<br>feature_name=cg07344990 | feature_id[2926].value ><br>threshold=0.5750180780887604   |
| node_226:<br>feature_name=cg10558233 | feature_id[3780].value <=<br>threshold=0.7217690348625183  |
| node_227:<br>feature_name=cg08097359 | feature_id[3116].value ><br>threshold=0.3598180413246155   |
| node_229:<br>feature_name=cg22737001 | feature_id[6843].value <=<br>threshold=0.46281898021698    |
| node_230:<br>feature_name=cg24276624 | feature_id[7242].value ><br>threshold=0.6169979274272919   |
| node_232:<br>feature_name=cg04026354 | feature_id[1982].value <=<br>threshold=0.42332448065280914 |
| node_233:<br>feature_name=cg06038180 | feature_id[2529].value ><br>threshold=0.6430551409721375   |
| node_235:<br>feature_name=cg14104252 | feature_id[4735].value ><br>threshold=0.5213949382305145   |
| node_239:<br>feature_name=cg06711298 | feature_id[2707].value ><br>threshold=0.36770085990428925  |
| node_241:<br>feature_name=cg11703722 | feature_id[4056].value ><br>threshold=0.5125315636396408   |
| node_243:<br>feature_name=cg21230793 | feature_id[6514].value ><br>threshold=0.27807849645614624  |
| node_245:<br>feature_name=cg06225767 | feature_id[2575].value ><br>threshold=0.18034886568784714  |
| node_247:<br>feature_name=cg00941576 | feature_id[1053].value ><br>threshold=0.2476368322968483   |
| node_249:<br>feature_name=cg10149889 | feature_id[3676].value ><br>threshold=0.633601188659668    |
| node_257:<br>feature_name=cg07608094 | feature_id[2999].value ><br>threshold=0.7820693254470825   |

|                                                         |                                                           |
|---------------------------------------------------------|-----------------------------------------------------------|
| node_259:<br>feature_name=cg03315432                    | feature_id[1783].value ><br>threshold=0.6790387332439423  |
| node_261:<br>feature_name=cg07894983                    | feature_id[3070].value ><br>threshold=0.3577418476343155  |
| node_263:<br>feature_name=cg15646741                    | feature_id[5160].value ><br>threshold=0.2826688587665558  |
| node_273:<br>feature_name=cg09701233                    | feature_id[3546].value ><br>threshold=0.5189756155014038  |
| node_275:<br>feature_name=cg09230938                    | feature_id[738].value ><br>threshold=0.3108274042606354   |
| node_277:<br>feature_name=cg05334190                    | feature_id[2341].value <=<br>threshold=0.2764553725719452 |
| Class: malignant peripheral nerve sheath tumour (MPNST) |                                                           |
|                                                         |                                                           |
| Rules_61                                                | passed counts:5                                           |
| node_0:<br>feature_name=cg11915444                      | feature_id[4116].value ><br>threshold=0.3402601182460785  |
| node_10:<br>feature_name=cg12109728                     | feature_id[4182].value ><br>threshold=0.7068270146846771  |
| node_20:<br>feature_name=cg10844382                     | feature_id[3856].value ><br>threshold=0.5988894104957581  |
| node_24:<br>feature_name=cg00631702                     | feature_id[943].value <=<br>threshold=0.37470583617687225 |
| node_25:<br>feature_name=cg07912144                     | feature_id[3075].value ><br>threshold=0.5578519105911255  |
| node_29:<br>feature_name=cg24407065                     | feature_id[388].value ><br>threshold=0.5364363789558411   |
| node_33:<br>feature_name=cg15275017                     | feature_id[5069].value ><br>threshold=0.4538573920726776  |
| node_51:<br>feature_name=cg07281938                     | feature_id[351].value ><br>threshold=0.7506992518901825   |
| node_73:<br>feature_name=cg17524821                     | feature_id[5626].value ><br>threshold=0.4504699558019638  |
| node_75:<br>feature_name=cg02973735                     | feature_id[1677].value ><br>threshold=0.29383400082588196 |
| node_77:<br>feature_name=cg23345038                     | feature_id[7002].value ><br>threshold=0.6255057156085968  |
| node_79:<br>feature_name=cg17537493                     | feature_id[5630].value ><br>threshold=0.5825372636318207  |
| node_85:<br>feature_name=cg12948116                     | feature_id[4375].value <=<br>threshold=0.5658791363239288 |
| node_86:<br>feature_name=cg06038180                     | feature_id[2529].value ><br>threshold=0.43877437710762024 |

|                                      |                                                            |
|--------------------------------------|------------------------------------------------------------|
| node_88:<br>feature_name=cg15720017  | feature_id[5175].value ><br>threshold=0.7009969055652618   |
| node_90:<br>feature_name=cg13070215  | feature_id[314].value <=<br>threshold=0.14645694941282272  |
| node_91:<br>feature_name=cg01014262  | feature_id[1082].value <=<br>threshold=0.5737917125225067  |
| node_92:<br>feature_name=cg16863382  | feature_id[5471].value ><br>threshold=0.7200668156147003   |
| node_102:<br>feature_name=cg06633739 | feature_id[2686].value ><br>threshold=0.47115950286388397  |
| node_126:<br>feature_name=cg22946562 | feature_id[744].value ><br>threshold=0.6194809079170227    |
| node_170:<br>feature_name=cg12120430 | feature_id[4185].value ><br>threshold=0.5775820016860962   |
| node_172:<br>feature_name=cg02137970 | feature_id[1411].value ><br>threshold=0.6705857813358307   |
| node_196:<br>feature_name=cg03393445 | feature_id[1807].value ><br>threshold=0.4260125905275345   |
| node_218:<br>feature_name=cg23525541 | feature_id[7049].value ><br>threshold=0.4485483318567276   |
| node_222:<br>feature_name=cg10543634 | feature_id[3775].value ><br>threshold=0.29505227506160736  |
| node_224:<br>feature_name=cg07344990 | feature_id[2926].value ><br>threshold=0.5750180780887604   |
| node_226:<br>feature_name=cg10558233 | feature_id[3780].value <=<br>threshold=0.7217690348625183  |
| node_227:<br>feature_name=cg08097359 | feature_id[3116].value ><br>threshold=0.3598180413246155   |
| node_229:<br>feature_name=cg22737001 | feature_id[6843].value <=<br>threshold=0.46281898021698    |
| node_230:<br>feature_name=cg24276624 | feature_id[7242].value ><br>threshold=0.6169979274272919   |
| node_232:<br>feature_name=cg04026354 | feature_id[1982].value <=<br>threshold=0.42332448065280914 |
| node_233:<br>feature_name=cg06038180 | feature_id[2529].value ><br>threshold=0.6430551409721375   |
| node_235:<br>feature_name=cg14104252 | feature_id[4735].value ><br>threshold=0.5213949382305145   |
| node_239:<br>feature_name=cg06711298 | feature_id[2707].value ><br>threshold=0.36770085990428925  |
| node_241:<br>feature_name=cg11703722 | feature_id[4056].value ><br>threshold=0.5125315636396408   |
| node_243:<br>feature_name=cg21230793 | feature_id[6514].value ><br>threshold=0.27807849645614624  |



|                                      |                                                           |
|--------------------------------------|-----------------------------------------------------------|
| node_245:<br>feature_name=cg06225767 | feature_id[2575].value ><br>threshold=0.18034886568784714 |
| node_247:<br>feature_name=cg00941576 | feature_id[1053].value ><br>threshold=0.2476368322968483  |
| node_249:<br>feature_name=cg10149889 | feature_id[3676].value ><br>threshold=0.633601188659668   |
| node_257:<br>feature_name=cg07608094 | feature_id[2999].value ><br>threshold=0.7820693254470825  |
| node_259:<br>feature_name=cg03315432 | feature_id[1783].value ><br>threshold=0.6790387332439423  |
| node_261:<br>feature_name=cg07894983 | feature_id[3070].value ><br>threshold=0.3577418476343155  |
| node_263:<br>feature_name=cg15646741 | feature_id[5160].value ><br>threshold=0.2826688587665558  |
| node_273:<br>feature_name=cg09701233 | feature_id[3546].value ><br>threshold=0.5189756155014038  |
| node_275:<br>feature_name=cg09230938 | feature_id[738].value <=<br>threshold=0.3108274042606354  |
| Class: osteoblastoma (OB)            |                                                           |
|                                      |                                                           |
| Rules_62                             | passed counts:5                                           |
| node_0:<br>feature_name=cg11915444   | feature_id[4116].value ><br>threshold=0.3402601182460785  |
| node_10:<br>feature_name=cg12109728  | feature_id[4182].value ><br>threshold=0.7068270146846771  |
| node_20:<br>feature_name=cg10844382  | feature_id[3856].value ><br>threshold=0.5988894104957581  |
| node_24:<br>feature_name=cg00631702  | feature_id[943].value <=<br>threshold=0.37470583617687225 |
| node_25:<br>feature_name=cg07912144  | feature_id[3075].value ><br>threshold=0.5578519105911255  |
| node_29:<br>feature_name=cg24407065  | feature_id[388].value ><br>threshold=0.5364363789558411   |
| node_33:<br>feature_name=cg15275017  | feature_id[5069].value ><br>threshold=0.4538573920726776  |
| node_51:<br>feature_name=cg07281938  | feature_id[351].value ><br>threshold=0.7506992518901825   |
| node_73:<br>feature_name=cg17524821  | feature_id[5626].value ><br>threshold=0.4504699558019638  |
| node_75:<br>feature_name=cg02973735  | feature_id[1677].value ><br>threshold=0.29383400082588196 |
| node_77:<br>feature_name=cg23345038  | feature_id[7002].value ><br>threshold=0.6255057156085968  |

|                                      |                                                            |
|--------------------------------------|------------------------------------------------------------|
| node_79:<br>feature_name=cg17537493  | feature_id[5630].value ><br>threshold=0.5825372636318207   |
| node_85:<br>feature_name=cg12948116  | feature_id[4375].value <=<br>threshold=0.5658791363239288  |
| node_86:<br>feature_name=cg06038180  | feature_id[2529].value ><br>threshold=0.43877437710762024  |
| node_88:<br>feature_name=cg15720017  | feature_id[5175].value ><br>threshold=0.7009969055652618   |
| node_90:<br>feature_name=cg13070215  | feature_id[314].value <=<br>threshold=0.14645694941282272  |
| node_91:<br>feature_name=cg01014262  | feature_id[1082].value <=<br>threshold=0.5737917125225067  |
| node_92:<br>feature_name=cg16863382  | feature_id[5471].value ><br>threshold=0.7200668156147003   |
| node_102:<br>feature_name=cg06633739 | feature_id[2686].value <=<br>threshold=0.47115950286388397 |
| node_103:<br>feature_name=cg03861097 | feature_id[1943].value <=<br>threshold=0.24196631461381912 |
| node_104:<br>feature_name=cg05145297 | feature_id[2285].value ><br>threshold=0.5227190256118774   |
| node_106:<br>feature_name=cg16797656 | feature_id[5460].value <=<br>threshold=0.4279162883758545  |
| Class: infantile fibrosarcoma (IFS)  |                                                            |
|                                      |                                                            |
| Rules_63                             | passed counts:4                                            |
| node_0:<br>feature_name=cg11915444   | feature_id[4116].value ><br>threshold=0.3402601182460785   |
| node_10:<br>feature_name=cg12109728  | feature_id[4182].value ><br>threshold=0.7068270146846771   |
| node_20:<br>feature_name=cg10844382  | feature_id[3856].value ><br>threshold=0.5988894104957581   |
| node_24:<br>feature_name=cg00631702  | feature_id[943].value <=<br>threshold=0.37470583617687225  |
| node_25:<br>feature_name=cg07912144  | feature_id[3075].value ><br>threshold=0.5578519105911255   |
| node_29:<br>feature_name=cg24407065  | feature_id[388].value ><br>threshold=0.5364363789558411    |
| node_33:<br>feature_name=cg15275017  | feature_id[5069].value ><br>threshold=0.4538573920726776   |
| node_51:<br>feature_name=cg07281938  | feature_id[351].value ><br>threshold=0.7506992518901825    |
| node_73:<br>feature_name=cg17524821  | feature_id[5626].value ><br>threshold=0.4504699558019638   |

|                                         |                                                            |
|-----------------------------------------|------------------------------------------------------------|
| node_75:<br>feature_name=cg02973735     | feature_id[1677].value ><br>threshold=0.29383400082588196  |
| node_77:<br>feature_name=cg23345038     | feature_id[7002].value ><br>threshold=0.6255057156085968   |
| node_79:<br>feature_name=cg17537493     | feature_id[5630].value ><br>threshold=0.5825372636318207   |
| node_85:<br>feature_name=cg12948116     | feature_id[4375].value <=<br>threshold=0.5658791363239288  |
| node_86:<br>feature_name=cg06038180     | feature_id[2529].value ><br>threshold=0.43877437710762024  |
| node_88:<br>feature_name=cg15720017     | feature_id[5175].value ><br>threshold=0.7009969055652618   |
| node_90:<br>feature_name=cg13070215     | feature_id[314].value ><br>threshold=0.14645694941282272   |
| node_340:<br>feature_name=cg06272543    | feature_id[2590].value <=<br>threshold=0.07370422407984734 |
| node_341:<br>feature_name=cg24268698    | feature_id[7238].value ><br>threshold=0.9151104986667633   |
| Class: undifferentiated sarcoma (USARC) |                                                            |
|                                         |                                                            |
| Rules_64                                | passed counts:4                                            |
| node_0:<br>feature_name=cg11915444      | feature_id[4116].value ><br>threshold=0.3402601182460785   |
| node_10:<br>feature_name=cg12109728     | feature_id[4182].value ><br>threshold=0.7068270146846771   |
| node_20:<br>feature_name=cg10844382     | feature_id[3856].value ><br>threshold=0.5988894104957581   |
| node_24:<br>feature_name=cg00631702     | feature_id[943].value <=<br>threshold=0.37470583617687225  |
| node_25:<br>feature_name=cg07912144     | feature_id[3075].value ><br>threshold=0.5578519105911255   |
| node_29:<br>feature_name=cg24407065     | feature_id[388].value ><br>threshold=0.5364363789558411    |
| node_33:<br>feature_name=cg15275017     | feature_id[5069].value ><br>threshold=0.4538573920726776   |
| node_51:<br>feature_name=cg07281938     | feature_id[351].value ><br>threshold=0.7506992518901825    |
| node_73:<br>feature_name=cg17524821     | feature_id[5626].value ><br>threshold=0.4504699558019638   |
| node_75:<br>feature_name=cg02973735     | feature_id[1677].value ><br>threshold=0.29383400082588196  |
| node_77:<br>feature_name=cg23345038     | feature_id[7002].value ><br>threshold=0.6255057156085968   |

|                                      |                                                            |
|--------------------------------------|------------------------------------------------------------|
| node_79:<br>feature_name=cg17537493  | feature_id[5630].value ><br>threshold=0.5825372636318207   |
| node_85:<br>feature_name=cg12948116  | feature_id[4375].value <=<br>threshold=0.5658791363239288  |
| node_86:<br>feature_name=cg06038180  | feature_id[2529].value ><br>threshold=0.43877437710762024  |
| node_88:<br>feature_name=cg15720017  | feature_id[5175].value ><br>threshold=0.7009969055652618   |
| node_90:<br>feature_name=cg13070215  | feature_id[314].value <=<br>threshold=0.14645694941282272  |
| node_91:<br>feature_name=cg01014262  | feature_id[1082].value <=<br>threshold=0.5737917125225067  |
| node_92:<br>feature_name=cg16863382  | feature_id[5471].value ><br>threshold=0.7200668156147003   |
| node_102:<br>feature_name=cg06633739 | feature_id[2686].value ><br>threshold=0.47115950286388397  |
| node_126:<br>feature_name=cg22946562 | feature_id[744].value ><br>threshold=0.6194809079170227    |
| node_170:<br>feature_name=cg12120430 | feature_id[4185].value ><br>threshold=0.5775820016860962   |
| node_172:<br>feature_name=cg02137970 | feature_id[1411].value ><br>threshold=0.6705857813358307   |
| node_196:<br>feature_name=cg03393445 | feature_id[1807].value ><br>threshold=0.4260125905275345   |
| node_218:<br>feature_name=cg23525541 | feature_id[7049].value ><br>threshold=0.4485483318567276   |
| node_222:<br>feature_name=cg10543634 | feature_id[3775].value ><br>threshold=0.29505227506160736  |
| node_224:<br>feature_name=cg07344990 | feature_id[2926].value ><br>threshold=0.5750180780887604   |
| node_226:<br>feature_name=cg10558233 | feature_id[3780].value <=<br>threshold=0.7217690348625183  |
| node_227:<br>feature_name=cg08097359 | feature_id[3116].value ><br>threshold=0.3598180413246155   |
| node_229:<br>feature_name=cg22737001 | feature_id[6843].value <=<br>threshold=0.46281898021698    |
| node_230:<br>feature_name=cg24276624 | feature_id[7242].value ><br>threshold=0.6169979274272919   |
| node_232:<br>feature_name=cg04026354 | feature_id[1982].value <=<br>threshold=0.42332448065280914 |
| node_233:<br>feature_name=cg06038180 | feature_id[2529].value ><br>threshold=0.6430551409721375   |
| node_235:<br>feature_name=cg14104252 | feature_id[4735].value ><br>threshold=0.5213949382305145   |

|                                      |                                                           |
|--------------------------------------|-----------------------------------------------------------|
| node_239:<br>feature_name=cg06711298 | feature_id[2707].value ><br>threshold=0.36770085990428925 |
| node_241:<br>feature_name=cg11703722 | feature_id[4056].value ><br>threshold=0.5125315636396408  |
| node_243:<br>feature_name=cg21230793 | feature_id[6514].value ><br>threshold=0.27807849645614624 |
| node_245:<br>feature_name=cg06225767 | feature_id[2575].value ><br>threshold=0.18034886568784714 |
| node_247:<br>feature_name=cg00941576 | feature_id[1053].value ><br>threshold=0.2476368322968483  |
| node_249:<br>feature_name=cg10149889 | feature_id[3676].value ><br>threshold=0.633601188659668   |
| node_257:<br>feature_name=cg07608094 | feature_id[2999].value ><br>threshold=0.7820693254470825  |
| node_259:<br>feature_name=cg03315432 | feature_id[1783].value ><br>threshold=0.6790387332439423  |
| node_261:<br>feature_name=cg07894983 | feature_id[3070].value ><br>threshold=0.3577418476343155  |
| node_263:<br>feature_name=cg15646741 | feature_id[5160].value ><br>threshold=0.2826688587665558  |
| node_273:<br>feature_name=cg09701233 | feature_id[3546].value ><br>threshold=0.5189756155014038  |
| node_275:<br>feature_name=cg09230938 | feature_id[738].value ><br>threshold=0.3108274042606354   |
| node_277:<br>feature_name=cg05334190 | feature_id[2341].value ><br>threshold=0.2764553725719452  |
| node_279:<br>feature_name=cg15617847 | feature_id[5148].value ><br>threshold=0.05914711393415928 |
| Class: chondrosarcoma (CSA)          |                                                           |
|                                      |                                                           |
| Rules_65                             | passed counts:4                                           |
| node_0:<br>feature_name=cg11915444   | feature_id[4116].value ><br>threshold=0.3402601182460785  |
| node_10:<br>feature_name=cg12109728  | feature_id[4182].value ><br>threshold=0.7068270146846771  |
| node_20:<br>feature_name=cg10844382  | feature_id[3856].value ><br>threshold=0.5988894104957581  |
| node_24:<br>feature_name=cg00631702  | feature_id[943].value <=<br>threshold=0.37470583617687225 |
| node_25:<br>feature_name=cg07912144  | feature_id[3075].value ><br>threshold=0.5578519105911255  |
| node_29:<br>feature_name=cg24407065  | feature_id[388].value ><br>threshold=0.5364363789558411   |

|                                      |                                                           |
|--------------------------------------|-----------------------------------------------------------|
| node_33:<br>feature_name=cg15275017  | feature_id[5069].value ><br>threshold=0.4538573920726776  |
| node_51:<br>feature_name=cg07281938  | feature_id[351].value ><br>threshold=0.7506992518901825   |
| node_73:<br>feature_name=cg17524821  | feature_id[5626].value ><br>threshold=0.4504699558019638  |
| node_75:<br>feature_name=cg02973735  | feature_id[1677].value ><br>threshold=0.29383400082588196 |
| node_77:<br>feature_name=cg23345038  | feature_id[7002].value ><br>threshold=0.6255057156085968  |
| node_79:<br>feature_name=cg17537493  | feature_id[5630].value ><br>threshold=0.5825372636318207  |
| node_85:<br>feature_name=cg12948116  | feature_id[4375].value <=<br>threshold=0.5658791363239288 |
| node_86:<br>feature_name=cg06038180  | feature_id[2529].value ><br>threshold=0.43877437710762024 |
| node_88:<br>feature_name=cg15720017  | feature_id[5175].value ><br>threshold=0.7009969055652618  |
| node_90:<br>feature_name=cg13070215  | feature_id[314].value <=<br>threshold=0.14645694941282272 |
| node_91:<br>feature_name=cg01014262  | feature_id[1082].value <=<br>threshold=0.5737917125225067 |
| node_92:<br>feature_name=cg16863382  | feature_id[5471].value ><br>threshold=0.7200668156147003  |
| node_102:<br>feature_name=cg06633739 | feature_id[2686].value ><br>threshold=0.47115950286388397 |
| node_126:<br>feature_name=cg22946562 | feature_id[744].value ><br>threshold=0.6194809079170227   |
| node_170:<br>feature_name=cg12120430 | feature_id[4185].value ><br>threshold=0.5775820016860962  |
| node_172:<br>feature_name=cg02137970 | feature_id[1411].value ><br>threshold=0.6705857813358307  |
| node_196:<br>feature_name=cg03393445 | feature_id[1807].value ><br>threshold=0.4260125905275345  |
| node_218:<br>feature_name=cg23525541 | feature_id[7049].value ><br>threshold=0.4485483318567276  |
| node_222:<br>feature_name=cg10543634 | feature_id[3775].value ><br>threshold=0.29505227506160736 |
| node_224:<br>feature_name=cg07344990 | feature_id[2926].value ><br>threshold=0.5750180780887604  |
| node_226:<br>feature_name=cg10558233 | feature_id[3780].value <=<br>threshold=0.7217690348625183 |
| node_227:<br>feature_name=cg08097359 | feature_id[3116].value ><br>threshold=0.3598180413246155  |

|                                      |                                                            |
|--------------------------------------|------------------------------------------------------------|
| node_229:<br>feature_name=cg22737001 | feature_id[6843].value <=<br>threshold=0.46281898021698    |
| node_230:<br>feature_name=cg24276624 | feature_id[7242].value ><br>threshold=0.6169979274272919   |
| node_232:<br>feature_name=cg04026354 | feature_id[1982].value <=<br>threshold=0.42332448065280914 |
| node_233:<br>feature_name=cg06038180 | feature_id[2529].value ><br>threshold=0.6430551409721375   |
| node_235:<br>feature_name=cg14104252 | feature_id[4735].value ><br>threshold=0.5213949382305145   |
| node_239:<br>feature_name=cg06711298 | feature_id[2707].value ><br>threshold=0.36770085990428925  |
| node_241:<br>feature_name=cg11703722 | feature_id[4056].value ><br>threshold=0.5125315636396408   |
| node_243:<br>feature_name=cg21230793 | feature_id[6514].value ><br>threshold=0.27807849645614624  |
| node_245:<br>feature_name=cg06225767 | feature_id[2575].value ><br>threshold=0.18034886568784714  |
| node_247:<br>feature_name=cg00941576 | feature_id[1053].value ><br>threshold=0.2476368322968483   |
| node_249:<br>feature_name=cg10149889 | feature_id[3676].value ><br>threshold=0.633601188659668    |
| node_257:<br>feature_name=cg07608094 | feature_id[2999].value ><br>threshold=0.7820693254470825   |
| node_259:<br>feature_name=cg03315432 | feature_id[1783].value ><br>threshold=0.6790387332439423   |
| node_261:<br>feature_name=cg07894983 | feature_id[3070].value ><br>threshold=0.3577418476343155   |
| node_263:<br>feature_name=cg15646741 | feature_id[5160].value ><br>threshold=0.2826688587665558   |
| node_273:<br>feature_name=cg09701233 | feature_id[3546].value ><br>threshold=0.5189756155014038   |
| node_275:<br>feature_name=cg09230938 | feature_id[738].value ><br>threshold=0.3108274042606354    |
| node_277:<br>feature_name=cg05334190 | feature_id[2341].value ><br>threshold=0.2764553725719452   |
| node_279:<br>feature_name=cg15617847 | feature_id[5148].value <=<br>threshold=0.05914711393415928 |
| node_280:<br>feature_name=cg00216961 | feature_id[816].value ><br>threshold=0.42650654911994934   |
| Class: lipoma (LIPO)                 |                                                            |
|                                      |                                                            |
| Rules_66                             | passed counts:4                                            |

|                                      |                                                           |
|--------------------------------------|-----------------------------------------------------------|
| node_0:<br>feature_name=cg11915444   | feature_id[4116].value ><br>threshold=0.3402601182460785  |
| node_10:<br>feature_name=cg12109728  | feature_id[4182].value ><br>threshold=0.7068270146846771  |
| node_20:<br>feature_name=cg10844382  | feature_id[3856].value ><br>threshold=0.5988894104957581  |
| node_24:<br>feature_name=cg00631702  | feature_id[943].value <=<br>threshold=0.37470583617687225 |
| node_25:<br>feature_name=cg07912144  | feature_id[3075].value ><br>threshold=0.5578519105911255  |
| node_29:<br>feature_name=cg24407065  | feature_id[388].value ><br>threshold=0.5364363789558411   |
| node_33:<br>feature_name=cg15275017  | feature_id[5069].value ><br>threshold=0.4538573920726776  |
| node_51:<br>feature_name=cg07281938  | feature_id[351].value ><br>threshold=0.7506992518901825   |
| node_73:<br>feature_name=cg17524821  | feature_id[5626].value ><br>threshold=0.4504699558019638  |
| node_75:<br>feature_name=cg02973735  | feature_id[1677].value ><br>threshold=0.29383400082588196 |
| node_77:<br>feature_name=cg23345038  | feature_id[7002].value ><br>threshold=0.6255057156085968  |
| node_79:<br>feature_name=cg17537493  | feature_id[5630].value ><br>threshold=0.5825372636318207  |
| node_85:<br>feature_name=cg12948116  | feature_id[4375].value <=<br>threshold=0.5658791363239288 |
| node_86:<br>feature_name=cg06038180  | feature_id[2529].value ><br>threshold=0.43877437710762024 |
| node_88:<br>feature_name=cg15720017  | feature_id[5175].value ><br>threshold=0.7009969055652618  |
| node_90:<br>feature_name=cg13070215  | feature_id[314].value <=<br>threshold=0.14645694941282272 |
| node_91:<br>feature_name=cg01014262  | feature_id[1082].value <=<br>threshold=0.5737917125225067 |
| node_92:<br>feature_name=cg16863382  | feature_id[5471].value ><br>threshold=0.7200668156147003  |
| node_102:<br>feature_name=cg06633739 | feature_id[2686].value ><br>threshold=0.47115950286388397 |
| node_126:<br>feature_name=cg22946562 | feature_id[744].value ><br>threshold=0.6194809079170227   |
| node_170:<br>feature_name=cg12120430 | feature_id[4185].value ><br>threshold=0.5775820016860962  |
| node_172:<br>feature_name=cg02137970 | feature_id[1411].value ><br>threshold=0.6705857813358307  |



|                                      |                                                            |
|--------------------------------------|------------------------------------------------------------|
| node_196:<br>feature_name=cg03393445 | feature_id[1807].value ><br>threshold=0.4260125905275345   |
| node_218:<br>feature_name=cg23525541 | feature_id[7049].value ><br>threshold=0.4485483318567276   |
| node_222:<br>feature_name=cg10543634 | feature_id[3775].value ><br>threshold=0.29505227506160736  |
| node_224:<br>feature_name=cg07344990 | feature_id[2926].value ><br>threshold=0.5750180780887604   |
| node_226:<br>feature_name=cg10558233 | feature_id[3780].value <=<br>threshold=0.7217690348625183  |
| node_227:<br>feature_name=cg08097359 | feature_id[3116].value ><br>threshold=0.3598180413246155   |
| node_229:<br>feature_name=cg22737001 | feature_id[6843].value <=<br>threshold=0.46281898021698    |
| node_230:<br>feature_name=cg24276624 | feature_id[7242].value ><br>threshold=0.6169979274272919   |
| node_232:<br>feature_name=cg04026354 | feature_id[1982].value <=<br>threshold=0.42332448065280914 |
| node_233:<br>feature_name=cg06038180 | feature_id[2529].value ><br>threshold=0.6430551409721375   |
| node_235:<br>feature_name=cg14104252 | feature_id[4735].value ><br>threshold=0.5213949382305145   |
| node_239:<br>feature_name=cg06711298 | feature_id[2707].value ><br>threshold=0.36770085990428925  |
| node_241:<br>feature_name=cg11703722 | feature_id[4056].value ><br>threshold=0.5125315636396408   |
| node_243:<br>feature_name=cg21230793 | feature_id[6514].value ><br>threshold=0.27807849645614624  |
| node_245:<br>feature_name=cg06225767 | feature_id[2575].value ><br>threshold=0.18034886568784714  |
| node_247:<br>feature_name=cg00941576 | feature_id[1053].value ><br>threshold=0.2476368322968483   |
| node_249:<br>feature_name=cg10149889 | feature_id[3676].value ><br>threshold=0.633601188659668    |
| node_257:<br>feature_name=cg07608094 | feature_id[2999].value ><br>threshold=0.7820693254470825   |
| node_259:<br>feature_name=cg03315432 | feature_id[1783].value ><br>threshold=0.6790387332439423   |
| node_261:<br>feature_name=cg07894983 | feature_id[3070].value ><br>threshold=0.3577418476343155   |
| node_263:<br>feature_name=cg15646741 | feature_id[5160].value ><br>threshold=0.2826688587665558   |
| node_273:<br>feature_name=cg09701233 | feature_id[3546].value ><br>threshold=0.5189756155014038   |

|                                         |                                                            |
|-----------------------------------------|------------------------------------------------------------|
| node_275:<br>feature_name=cg09230938    | feature_id[738].value ><br>threshold=0.3108274042606354    |
| node_277:<br>feature_name=cg05334190    | feature_id[2341].value ><br>threshold=0.2764553725719452   |
| node_279:<br>feature_name=cg15617847    | feature_id[5148].value <=<br>threshold=0.05914711393415928 |
| node_280:<br>feature_name=cg00216961    | feature_id[816].value <=<br>threshold=0.42650654911994934  |
| node_281:<br>feature_name=cg23946462    | feature_id[7146].value ><br>threshold=0.9469821751117706   |
| Class: undifferentiated sarcoma (USARC) |                                                            |
|                                         |                                                            |
| Rules_67                                | passed counts:4                                            |
| node_0:<br>feature_name=cg11915444      | feature_id[4116].value ><br>threshold=0.3402601182460785   |
| node_10:<br>feature_name=cg12109728     | feature_id[4182].value ><br>threshold=0.7068270146846771   |
| node_20:<br>feature_name=cg10844382     | feature_id[3856].value ><br>threshold=0.5988894104957581   |
| node_24:<br>feature_name=cg00631702     | feature_id[943].value <=<br>threshold=0.37470583617687225  |
| node_25:<br>feature_name=cg07912144     | feature_id[3075].value ><br>threshold=0.5578519105911255   |
| node_29:<br>feature_name=cg24407065     | feature_id[388].value ><br>threshold=0.5364363789558411    |
| node_33:<br>feature_name=cg15275017     | feature_id[5069].value ><br>threshold=0.4538573920726776   |
| node_51:<br>feature_name=cg07281938     | feature_id[351].value ><br>threshold=0.7506992518901825    |
| node_73:<br>feature_name=cg17524821     | feature_id[5626].value ><br>threshold=0.4504699558019638   |
| node_75:<br>feature_name=cg02973735     | feature_id[1677].value ><br>threshold=0.29383400082588196  |
| node_77:<br>feature_name=cg23345038     | feature_id[7002].value ><br>threshold=0.6255057156085968   |
| node_79:<br>feature_name=cg17537493     | feature_id[5630].value ><br>threshold=0.5825372636318207   |
| node_85:<br>feature_name=cg12948116     | feature_id[4375].value <=<br>threshold=0.5658791363239288  |
| node_86:<br>feature_name=cg06038180     | feature_id[2529].value ><br>threshold=0.43877437710762024  |
| node_88:<br>feature_name=cg15720017     | feature_id[5175].value ><br>threshold=0.7009969055652618   |

|                                      |                                                            |
|--------------------------------------|------------------------------------------------------------|
| node_90:<br>feature_name=cg13070215  | feature_id[314].value <=<br>threshold=0.14645694941282272  |
| node_91:<br>feature_name=cg01014262  | feature_id[1082].value <=<br>threshold=0.5737917125225067  |
| node_92:<br>feature_name=cg16863382  | feature_id[5471].value ><br>threshold=0.7200668156147003   |
| node_102:<br>feature_name=cg06633739 | feature_id[2686].value ><br>threshold=0.47115950286388397  |
| node_126:<br>feature_name=cg22946562 | feature_id[744].value ><br>threshold=0.6194809079170227    |
| node_170:<br>feature_name=cg12120430 | feature_id[4185].value ><br>threshold=0.5775820016860962   |
| node_172:<br>feature_name=cg02137970 | feature_id[1411].value ><br>threshold=0.6705857813358307   |
| node_196:<br>feature_name=cg03393445 | feature_id[1807].value ><br>threshold=0.4260125905275345   |
| node_218:<br>feature_name=cg23525541 | feature_id[7049].value ><br>threshold=0.4485483318567276   |
| node_222:<br>feature_name=cg10543634 | feature_id[3775].value ><br>threshold=0.29505227506160736  |
| node_224:<br>feature_name=cg07344990 | feature_id[2926].value ><br>threshold=0.5750180780887604   |
| node_226:<br>feature_name=cg10558233 | feature_id[3780].value <=<br>threshold=0.7217690348625183  |
| node_227:<br>feature_name=cg08097359 | feature_id[3116].value ><br>threshold=0.3598180413246155   |
| node_229:<br>feature_name=cg22737001 | feature_id[6843].value <=<br>threshold=0.46281898021698    |
| node_230:<br>feature_name=cg24276624 | feature_id[7242].value ><br>threshold=0.6169979274272919   |
| node_232:<br>feature_name=cg04026354 | feature_id[1982].value <=<br>threshold=0.42332448065280914 |
| node_233:<br>feature_name=cg06038180 | feature_id[2529].value ><br>threshold=0.6430551409721375   |
| node_235:<br>feature_name=cg14104252 | feature_id[4735].value ><br>threshold=0.5213949382305145   |
| node_239:<br>feature_name=cg06711298 | feature_id[2707].value ><br>threshold=0.36770085990428925  |
| node_241:<br>feature_name=cg11703722 | feature_id[4056].value ><br>threshold=0.5125315636396408   |
| node_243:<br>feature_name=cg21230793 | feature_id[6514].value ><br>threshold=0.27807849645614624  |
| node_245:<br>feature_name=cg06225767 | feature_id[2575].value ><br>threshold=0.18034886568784714  |

|                                                                                   |                                                            |
|-----------------------------------------------------------------------------------|------------------------------------------------------------|
| node_247:<br>feature_name=cg00941576                                              | feature_id[1053].value ><br>threshold=0.2476368322968483   |
| node_249:<br>feature_name=cg10149889                                              | feature_id[3676].value ><br>threshold=0.633601188659668    |
| node_257:<br>feature_name=cg07608094                                              | feature_id[2999].value ><br>threshold=0.7820693254470825   |
| node_259:<br>feature_name=cg03315432                                              | feature_id[1783].value ><br>threshold=0.6790387332439423   |
| node_261:<br>feature_name=cg07894983                                              | feature_id[3070].value ><br>threshold=0.3577418476343155   |
| node_263:<br>feature_name=cg15646741                                              | feature_id[5160].value ><br>threshold=0.2826688587665558   |
| node_273:<br>feature_name=cg09701233                                              | feature_id[3546].value ><br>threshold=0.5189756155014038   |
| node_275:<br>feature_name=cg09230938                                              | feature_id[738].value ><br>threshold=0.3108274042606354    |
| node_277:<br>feature_name=cg05334190                                              | feature_id[2341].value ><br>threshold=0.2764553725719452   |
| node_279:<br>feature_name=cg15617847                                              | feature_id[5148].value <=<br>threshold=0.05914711393415928 |
| node_280:<br>feature_name=cg00216961                                              | feature_id[816].value <=<br>threshold=0.42650654911994934  |
| node_281:<br>feature_name=cg23946462                                              | feature_id[7146].value <=<br>threshold=0.9469821751117706  |
| node_282:<br>feature_name=cg06143290                                              | feature_id[2554].value ><br>threshold=0.9263531863689423   |
| Class: well differentiated liposarcoma (WDLS)/dedifferentiated liposarcoma (DDLs) |                                                            |
|                                                                                   |                                                            |
| Rules_68                                                                          | passed counts:4                                            |
| node_0:<br>feature_name=cg11915444                                                | feature_id[4116].value ><br>threshold=0.3402601182460785   |
| node_10:<br>feature_name=cg12109728                                               | feature_id[4182].value ><br>threshold=0.7068270146846771   |
| node_20:<br>feature_name=cg10844382                                               | feature_id[3856].value ><br>threshold=0.5988894104957581   |
| node_24:<br>feature_name=cg00631702                                               | feature_id[943].value <=<br>threshold=0.37470583617687225  |
| node_25:<br>feature_name=cg07912144                                               | feature_id[3075].value ><br>threshold=0.5578519105911255   |
| node_29:<br>feature_name=cg24407065                                               | feature_id[388].value ><br>threshold=0.5364363789558411    |
| node_33:<br>feature_name=cg15275017                                               | feature_id[5069].value ><br>threshold=0.4538573920726776   |

|                                      |                                                            |
|--------------------------------------|------------------------------------------------------------|
| node_51:<br>feature_name=cg07281938  | feature_id[351].value ><br>threshold=0.7506992518901825    |
| node_73:<br>feature_name=cg17524821  | feature_id[5626].value ><br>threshold=0.4504699558019638   |
| node_75:<br>feature_name=cg02973735  | feature_id[1677].value ><br>threshold=0.29383400082588196  |
| node_77:<br>feature_name=cg23345038  | feature_id[7002].value ><br>threshold=0.6255057156085968   |
| node_79:<br>feature_name=cg17537493  | feature_id[5630].value ><br>threshold=0.5825372636318207   |
| node_85:<br>feature_name=cg12948116  | feature_id[4375].value <=<br>threshold=0.5658791363239288  |
| node_86:<br>feature_name=cg06038180  | feature_id[2529].value ><br>threshold=0.43877437710762024  |
| node_88:<br>feature_name=cg15720017  | feature_id[5175].value ><br>threshold=0.7009969055652618   |
| node_90:<br>feature_name=cg13070215  | feature_id[314].value <=<br>threshold=0.14645694941282272  |
| node_91:<br>feature_name=cg01014262  | feature_id[1082].value <=<br>threshold=0.5737917125225067  |
| node_92:<br>feature_name=cg16863382  | feature_id[5471].value ><br>threshold=0.7200668156147003   |
| node_102:<br>feature_name=cg06633739 | feature_id[2686].value ><br>threshold=0.47115950286388397  |
| node_126:<br>feature_name=cg22946562 | feature_id[744].value ><br>threshold=0.6194809079170227    |
| node_170:<br>feature_name=cg12120430 | feature_id[4185].value ><br>threshold=0.5775820016860962   |
| node_172:<br>feature_name=cg02137970 | feature_id[1411].value <=<br>threshold=0.6705857813358307  |
| node_173:<br>feature_name=cg16185457 | feature_id[5282].value <=<br>threshold=0.5055856853723526  |
| node_174:<br>feature_name=cg09040552 | feature_id[3370].value ><br>threshold=0.596051037311554    |
| node_176:<br>feature_name=cg12064373 | feature_id[4162].value <=<br>threshold=0.10608945414423943 |
| node_177:<br>feature_name=cg04874782 | feature_id[2203].value <=<br>threshold=0.24745557457208633 |
| node_178:<br>feature_name=cg10963218 | feature_id[3883].value <=<br>threshold=0.6643033921718597  |
| Class: chondroblastoma (CB)          |                                                            |
|                                      |                                                            |
| Rules_69                             | passed counts:4                                            |

|                                      |                                                           |
|--------------------------------------|-----------------------------------------------------------|
| node_0:<br>feature_name=cg11915444   | feature_id[4116].value ><br>threshold=0.3402601182460785  |
| node_10:<br>feature_name=cg12109728  | feature_id[4182].value ><br>threshold=0.7068270146846771  |
| node_20:<br>feature_name=cg10844382  | feature_id[3856].value ><br>threshold=0.5988894104957581  |
| node_24:<br>feature_name=cg00631702  | feature_id[943].value <=<br>threshold=0.37470583617687225 |
| node_25:<br>feature_name=cg07912144  | feature_id[3075].value ><br>threshold=0.5578519105911255  |
| node_29:<br>feature_name=cg24407065  | feature_id[388].value ><br>threshold=0.5364363789558411   |
| node_33:<br>feature_name=cg15275017  | feature_id[5069].value ><br>threshold=0.4538573920726776  |
| node_51:<br>feature_name=cg07281938  | feature_id[351].value ><br>threshold=0.7506992518901825   |
| node_73:<br>feature_name=cg17524821  | feature_id[5626].value ><br>threshold=0.4504699558019638  |
| node_75:<br>feature_name=cg02973735  | feature_id[1677].value ><br>threshold=0.29383400082588196 |
| node_77:<br>feature_name=cg23345038  | feature_id[7002].value ><br>threshold=0.6255057156085968  |
| node_79:<br>feature_name=cg17537493  | feature_id[5630].value ><br>threshold=0.5825372636318207  |
| node_85:<br>feature_name=cg12948116  | feature_id[4375].value <=<br>threshold=0.5658791363239288 |
| node_86:<br>feature_name=cg06038180  | feature_id[2529].value ><br>threshold=0.43877437710762024 |
| node_88:<br>feature_name=cg15720017  | feature_id[5175].value ><br>threshold=0.7009969055652618  |
| node_90:<br>feature_name=cg13070215  | feature_id[314].value <=<br>threshold=0.14645694941282272 |
| node_91:<br>feature_name=cg01014262  | feature_id[1082].value <=<br>threshold=0.5737917125225067 |
| node_92:<br>feature_name=cg16863382  | feature_id[5471].value ><br>threshold=0.7200668156147003  |
| node_102:<br>feature_name=cg06633739 | feature_id[2686].value ><br>threshold=0.47115950286388397 |
| node_126:<br>feature_name=cg22946562 | feature_id[744].value <=<br>threshold=0.6194809079170227  |
| node_127:<br>feature_name=cg23920016 | feature_id[7139].value ><br>threshold=0.7449243068695068  |
| node_151:<br>feature_name=cg21617218 | feature_id[6608].value ><br>threshold=0.8795748353004456  |

|                                               |                                                           |
|-----------------------------------------------|-----------------------------------------------------------|
| node_153:<br>feature_name=cg01663970          | feature_id[1273].value ><br>threshold=0.8442256152629852  |
| node_155:<br>feature_name=cg00686915          | feature_id[965].value <=<br>threshold=0.20000632852315903 |
| Class: clear cell sarcoma of soft parts (CCS) |                                                           |
|                                               |                                                           |
| Rules_70                                      | passed counts:4                                           |
| node_0:<br>feature_name=cg11915444            | feature_id[4116].value ><br>threshold=0.3402601182460785  |
| node_10:<br>feature_name=cg12109728           | feature_id[4182].value ><br>threshold=0.7068270146846771  |
| node_20:<br>feature_name=cg10844382           | feature_id[3856].value ><br>threshold=0.5988894104957581  |
| node_24:<br>feature_name=cg00631702           | feature_id[943].value <=<br>threshold=0.37470583617687225 |
| node_25:<br>feature_name=cg07912144           | feature_id[3075].value ><br>threshold=0.5578519105911255  |
| node_29:<br>feature_name=cg24407065           | feature_id[388].value ><br>threshold=0.5364363789558411   |
| node_33:<br>feature_name=cg15275017           | feature_id[5069].value ><br>threshold=0.4538573920726776  |
| node_51:<br>feature_name=cg07281938           | feature_id[351].value ><br>threshold=0.7506992518901825   |
| node_73:<br>feature_name=cg17524821           | feature_id[5626].value ><br>threshold=0.4504699558019638  |
| node_75:<br>feature_name=cg02973735           | feature_id[1677].value ><br>threshold=0.29383400082588196 |
| node_77:<br>feature_name=cg23345038           | feature_id[7002].value ><br>threshold=0.6255057156085968  |
| node_79:<br>feature_name=cg17537493           | feature_id[5630].value <=<br>threshold=0.5825372636318207 |
| node_80:<br>feature_name=cg07990390           | feature_id[515].value ><br>threshold=0.7988054752349854   |
| node_82:<br>feature_name=cg10006956           | feature_id[3627].value <=<br>threshold=0.9051482081413269 |
| Class: Kaposi sarcoma (KS)                    |                                                           |
|                                               |                                                           |
| Rules_71                                      | passed counts:4                                           |
| node_0:<br>feature_name=cg11915444            | feature_id[4116].value ><br>threshold=0.3402601182460785  |
| node_10:<br>feature_name=cg12109728           | feature_id[4182].value ><br>threshold=0.7068270146846771  |

|                                                         |                                                           |
|---------------------------------------------------------|-----------------------------------------------------------|
| node_20:<br>feature_name=cg10844382                     | feature_id[3856].value ><br>threshold=0.5988894104957581  |
| node_24:<br>feature_name=cg00631702                     | feature_id[943].value <=<br>threshold=0.37470583617687225 |
| node_25:<br>feature_name=cg07912144                     | feature_id[3075].value ><br>threshold=0.5578519105911255  |
| node_29:<br>feature_name=cg24407065                     | feature_id[388].value ><br>threshold=0.5364363789558411   |
| node_33:<br>feature_name=cg15275017                     | feature_id[5069].value ><br>threshold=0.4538573920726776  |
| node_51:<br>feature_name=cg07281938                     | feature_id[351].value <=<br>threshold=0.7506992518901825  |
| node_52:<br>feature_name=cg21189849                     | feature_id[6504].value ><br>threshold=0.7545044124126434  |
| node_58:<br>feature_name=cg02867857                     | feature_id[1644].value ><br>threshold=0.5450765490531921  |
| node_60:<br>feature_name=cg00863893                     | feature_id[1017].value <=<br>threshold=0.5313664376735687 |
| node_61:<br>feature_name=cg22397446                     | feature_id[6765].value ><br>threshold=0.02860488835722208 |
| Class: clear cell chondrosarcoma (CSA (CC))             |                                                           |
|                                                         |                                                           |
| Rules_72                                                | passed counts:3                                           |
| node_0:<br>feature_name=cg11915444                      | feature_id[4116].value ><br>threshold=0.3402601182460785  |
| node_10:<br>feature_name=cg12109728                     | feature_id[4182].value ><br>threshold=0.7068270146846771  |
| node_20:<br>feature_name=cg10844382                     | feature_id[3856].value ><br>threshold=0.5988894104957581  |
| node_24:<br>feature_name=cg00631702                     | feature_id[943].value ><br>threshold=0.37470583617687225  |
| node_352:<br>feature_name=cg07027613                    | feature_id[549].value <=<br>threshold=0.22842608392238617 |
| node_353:<br>feature_name=cg04356968                    | feature_id[2068].value ><br>threshold=0.728985995054245   |
| Class: malignant peripheral nerve sheath tumour (MPNST) |                                                           |
|                                                         |                                                           |
| Rules_73                                                | passed counts:3                                           |
| node_0:<br>feature_name=cg11915444                      | feature_id[4116].value ><br>threshold=0.3402601182460785  |
| node_10:<br>feature_name=cg12109728                     | feature_id[4182].value ><br>threshold=0.7068270146846771  |



|                                      |                                                           |
|--------------------------------------|-----------------------------------------------------------|
| node_20:<br>feature_name=cg10844382  | feature_id[3856].value ><br>threshold=0.5988894104957581  |
| node_24:<br>feature_name=cg00631702  | feature_id[943].value <=<br>threshold=0.37470583617687225 |
| node_25:<br>feature_name=cg07912144  | feature_id[3075].value ><br>threshold=0.5578519105911255  |
| node_29:<br>feature_name=cg24407065  | feature_id[388].value ><br>threshold=0.5364363789558411   |
| node_33:<br>feature_name=cg15275017  | feature_id[5069].value ><br>threshold=0.4538573920726776  |
| node_51:<br>feature_name=cg07281938  | feature_id[351].value ><br>threshold=0.7506992518901825   |
| node_73:<br>feature_name=cg17524821  | feature_id[5626].value ><br>threshold=0.4504699558019638  |
| node_75:<br>feature_name=cg02973735  | feature_id[1677].value ><br>threshold=0.29383400082588196 |
| node_77:<br>feature_name=cg23345038  | feature_id[7002].value ><br>threshold=0.6255057156085968  |
| node_79:<br>feature_name=cg17537493  | feature_id[5630].value ><br>threshold=0.5825372636318207  |
| node_85:<br>feature_name=cg12948116  | feature_id[4375].value <=<br>threshold=0.5658791363239288 |
| node_86:<br>feature_name=cg06038180  | feature_id[2529].value ><br>threshold=0.43877437710762024 |
| node_88:<br>feature_name=cg15720017  | feature_id[5175].value ><br>threshold=0.7009969055652618  |
| node_90:<br>feature_name=cg13070215  | feature_id[314].value <=<br>threshold=0.14645694941282272 |
| node_91:<br>feature_name=cg01014262  | feature_id[1082].value <=<br>threshold=0.5737917125225067 |
| node_92:<br>feature_name=cg16863382  | feature_id[5471].value ><br>threshold=0.7200668156147003  |
| node_102:<br>feature_name=cg06633739 | feature_id[2686].value ><br>threshold=0.47115950286388397 |
| node_126:<br>feature_name=cg22946562 | feature_id[744].value ><br>threshold=0.6194809079170227   |
| node_170:<br>feature_name=cg12120430 | feature_id[4185].value ><br>threshold=0.5775820016860962  |
| node_172:<br>feature_name=cg02137970 | feature_id[1411].value ><br>threshold=0.6705857813358307  |
| node_196:<br>feature_name=cg03393445 | feature_id[1807].value ><br>threshold=0.4260125905275345  |
| node_218:<br>feature_name=cg23525541 | feature_id[7049].value ><br>threshold=0.4485483318567276  |

|                                      |                                                            |
|--------------------------------------|------------------------------------------------------------|
| node_222:<br>feature_name=cg10543634 | feature_id[3775].value ><br>threshold=0.29505227506160736  |
| node_224:<br>feature_name=cg07344990 | feature_id[2926].value ><br>threshold=0.5750180780887604   |
| node_226:<br>feature_name=cg10558233 | feature_id[3780].value <=<br>threshold=0.7217690348625183  |
| node_227:<br>feature_name=cg08097359 | feature_id[3116].value ><br>threshold=0.3598180413246155   |
| node_229:<br>feature_name=cg22737001 | feature_id[6843].value <=<br>threshold=0.46281898021698    |
| node_230:<br>feature_name=cg24276624 | feature_id[7242].value ><br>threshold=0.6169979274272919   |
| node_232:<br>feature_name=cg04026354 | feature_id[1982].value <=<br>threshold=0.42332448065280914 |
| node_233:<br>feature_name=cg06038180 | feature_id[2529].value ><br>threshold=0.6430551409721375   |
| node_235:<br>feature_name=cg14104252 | feature_id[4735].value ><br>threshold=0.5213949382305145   |
| node_239:<br>feature_name=cg06711298 | feature_id[2707].value ><br>threshold=0.36770085990428925  |
| node_241:<br>feature_name=cg11703722 | feature_id[4056].value ><br>threshold=0.5125315636396408   |
| node_243:<br>feature_name=cg21230793 | feature_id[6514].value ><br>threshold=0.27807849645614624  |
| node_245:<br>feature_name=cg06225767 | feature_id[2575].value ><br>threshold=0.18034886568784714  |
| node_247:<br>feature_name=cg00941576 | feature_id[1053].value ><br>threshold=0.2476368322968483   |
| node_249:<br>feature_name=cg10149889 | feature_id[3676].value ><br>threshold=0.633601188659668    |
| node_257:<br>feature_name=cg07608094 | feature_id[2999].value ><br>threshold=0.7820693254470825   |
| node_259:<br>feature_name=cg03315432 | feature_id[1783].value ><br>threshold=0.6790387332439423   |
| node_261:<br>feature_name=cg07894983 | feature_id[3070].value ><br>threshold=0.3577418476343155   |
| node_263:<br>feature_name=cg15646741 | feature_id[5160].value ><br>threshold=0.2826688587665558   |
| node_273:<br>feature_name=cg09701233 | feature_id[3546].value ><br>threshold=0.5189756155014038   |
| node_275:<br>feature_name=cg09230938 | feature_id[738].value ><br>threshold=0.3108274042606354    |
| node_277:<br>feature_name=cg05334190 | feature_id[2341].value ><br>threshold=0.2764553725719452   |

|                                                                      |                                                            |
|----------------------------------------------------------------------|------------------------------------------------------------|
| node_279:<br>feature_name=cg15617847                                 | feature_id[5148].value <=<br>threshold=0.05914711393415928 |
| node_280:<br>feature_name=cg00216961                                 | feature_id[816].value <=<br>threshold=0.42650654911994934  |
| node_281:<br>feature_name=cg23946462                                 | feature_id[7146].value <=<br>threshold=0.9469821751117706  |
| node_282:<br>feature_name=cg06143290                                 | feature_id[2554].value <=<br>threshold=0.9263531863689423  |
| node_283:<br>feature_name=cg21528710                                 | feature_id[6588].value ><br>threshold=0.8718287348747253   |
| Class: atypical fibroxanthoma (AFX)/pleomorphic dermal sarcoma (PDS) |                                                            |
|                                                                      |                                                            |
| Rules_74                                                             | passed counts:3                                            |
| node_0:<br>feature_name=cg11915444                                   | feature_id[4116].value ><br>threshold=0.3402601182460785   |
| node_10:<br>feature_name=cg12109728                                  | feature_id[4182].value ><br>threshold=0.7068270146846771   |
| node_20:<br>feature_name=cg10844382                                  | feature_id[3856].value ><br>threshold=0.5988894104957581   |
| node_24:<br>feature_name=cg00631702                                  | feature_id[943].value <=<br>threshold=0.37470583617687225  |
| node_25:<br>feature_name=cg07912144                                  | feature_id[3075].value ><br>threshold=0.5578519105911255   |
| node_29:<br>feature_name=cg24407065                                  | feature_id[388].value ><br>threshold=0.5364363789558411    |
| node_33:<br>feature_name=cg15275017                                  | feature_id[5069].value ><br>threshold=0.4538573920726776   |
| node_51:<br>feature_name=cg07281938                                  | feature_id[351].value ><br>threshold=0.7506992518901825    |
| node_73:<br>feature_name=cg17524821                                  | feature_id[5626].value ><br>threshold=0.4504699558019638   |
| node_75:<br>feature_name=cg02973735                                  | feature_id[1677].value ><br>threshold=0.29383400082588196  |
| node_77:<br>feature_name=cg23345038                                  | feature_id[7002].value ><br>threshold=0.6255057156085968   |
| node_79:<br>feature_name=cg17537493                                  | feature_id[5630].value ><br>threshold=0.5825372636318207   |
| node_85:<br>feature_name=cg12948116                                  | feature_id[4375].value <=<br>threshold=0.5658791363239288  |
| node_86:<br>feature_name=cg06038180                                  | feature_id[2529].value ><br>threshold=0.43877437710762024  |
| node_88:<br>feature_name=cg15720017                                  | feature_id[5175].value ><br>threshold=0.7009969055652618   |

|                                      |                                                            |
|--------------------------------------|------------------------------------------------------------|
| node_90:<br>feature_name=cg13070215  | feature_id[314].value <=<br>threshold=0.14645694941282272  |
| node_91:<br>feature_name=cg01014262  | feature_id[1082].value <=<br>threshold=0.5737917125225067  |
| node_92:<br>feature_name=cg16863382  | feature_id[5471].value ><br>threshold=0.7200668156147003   |
| node_102:<br>feature_name=cg06633739 | feature_id[2686].value ><br>threshold=0.47115950286388397  |
| node_126:<br>feature_name=cg22946562 | feature_id[744].value ><br>threshold=0.6194809079170227    |
| node_170:<br>feature_name=cg12120430 | feature_id[4185].value ><br>threshold=0.5775820016860962   |
| node_172:<br>feature_name=cg02137970 | feature_id[1411].value ><br>threshold=0.6705857813358307   |
| node_196:<br>feature_name=cg03393445 | feature_id[1807].value ><br>threshold=0.4260125905275345   |
| node_218:<br>feature_name=cg23525541 | feature_id[7049].value ><br>threshold=0.4485483318567276   |
| node_222:<br>feature_name=cg10543634 | feature_id[3775].value ><br>threshold=0.29505227506160736  |
| node_224:<br>feature_name=cg07344990 | feature_id[2926].value ><br>threshold=0.5750180780887604   |
| node_226:<br>feature_name=cg10558233 | feature_id[3780].value <=<br>threshold=0.7217690348625183  |
| node_227:<br>feature_name=cg08097359 | feature_id[3116].value ><br>threshold=0.3598180413246155   |
| node_229:<br>feature_name=cg22737001 | feature_id[6843].value <=<br>threshold=0.46281898021698    |
| node_230:<br>feature_name=cg24276624 | feature_id[7242].value ><br>threshold=0.6169979274272919   |
| node_232:<br>feature_name=cg04026354 | feature_id[1982].value <=<br>threshold=0.42332448065280914 |
| node_233:<br>feature_name=cg06038180 | feature_id[2529].value ><br>threshold=0.6430551409721375   |
| node_235:<br>feature_name=cg14104252 | feature_id[4735].value ><br>threshold=0.5213949382305145   |
| node_239:<br>feature_name=cg06711298 | feature_id[2707].value ><br>threshold=0.36770085990428925  |
| node_241:<br>feature_name=cg11703722 | feature_id[4056].value ><br>threshold=0.5125315636396408   |
| node_243:<br>feature_name=cg21230793 | feature_id[6514].value ><br>threshold=0.27807849645614624  |
| node_245:<br>feature_name=cg06225767 | feature_id[2575].value ><br>threshold=0.18034886568784714  |

|                                      |                                                            |
|--------------------------------------|------------------------------------------------------------|
| node_247:<br>feature_name=cg00941576 | feature_id[1053].value ><br>threshold=0.2476368322968483   |
| node_249:<br>feature_name=cg10149889 | feature_id[3676].value ><br>threshold=0.633601188659668    |
| node_257:<br>feature_name=cg07608094 | feature_id[2999].value ><br>threshold=0.7820693254470825   |
| node_259:<br>feature_name=cg03315432 | feature_id[1783].value ><br>threshold=0.6790387332439423   |
| node_261:<br>feature_name=cg07894983 | feature_id[3070].value ><br>threshold=0.3577418476343155   |
| node_263:<br>feature_name=cg15646741 | feature_id[5160].value <=<br>threshold=0.2826688587665558  |
| node_264:<br>feature_name=cg05400196 | feature_id[2366].value <=<br>threshold=0.666697084903717   |
| node_265:<br>feature_name=cg11936643 | feature_id[4120].value <=<br>threshold=0.19320054352283478 |
| Class: chondroblastoma (CB)          |                                                            |
|                                      |                                                            |
| Rules_75                             | passed counts:3                                            |
| node_0:<br>feature_name=cg11915444   | feature_id[4116].value ><br>threshold=0.3402601182460785   |
| node_10:<br>feature_name=cg12109728  | feature_id[4182].value ><br>threshold=0.7068270146846771   |
| node_20:<br>feature_name=cg10844382  | feature_id[3856].value ><br>threshold=0.5988894104957581   |
| node_24:<br>feature_name=cg00631702  | feature_id[943].value <=<br>threshold=0.37470583617687225  |
| node_25:<br>feature_name=cg07912144  | feature_id[3075].value ><br>threshold=0.5578519105911255   |
| node_29:<br>feature_name=cg24407065  | feature_id[388].value ><br>threshold=0.5364363789558411    |
| node_33:<br>feature_name=cg15275017  | feature_id[5069].value ><br>threshold=0.4538573920726776   |
| node_51:<br>feature_name=cg07281938  | feature_id[351].value ><br>threshold=0.7506992518901825    |
| node_73:<br>feature_name=cg17524821  | feature_id[5626].value ><br>threshold=0.4504699558019638   |
| node_75:<br>feature_name=cg02973735  | feature_id[1677].value ><br>threshold=0.29383400082588196  |
| node_77:<br>feature_name=cg23345038  | feature_id[7002].value ><br>threshold=0.6255057156085968   |
| node_79:<br>feature_name=cg17537493  | feature_id[5630].value ><br>threshold=0.5825372636318207   |

|                                      |                                                           |
|--------------------------------------|-----------------------------------------------------------|
| node_85:<br>feature_name=cg12948116  | feature_id[4375].value <=<br>threshold=0.5658791363239288 |
| node_86:<br>feature_name=cg06038180  | feature_id[2529].value ><br>threshold=0.43877437710762024 |
| node_88:<br>feature_name=cg15720017  | feature_id[5175].value ><br>threshold=0.7009969055652618  |
| node_90:<br>feature_name=cg13070215  | feature_id[314].value <=<br>threshold=0.14645694941282272 |
| node_91:<br>feature_name=cg01014262  | feature_id[1082].value <=<br>threshold=0.5737917125225067 |
| node_92:<br>feature_name=cg16863382  | feature_id[5471].value ><br>threshold=0.7200668156147003  |
| node_102:<br>feature_name=cg06633739 | feature_id[2686].value ><br>threshold=0.47115950286388397 |
| node_126:<br>feature_name=cg22946562 | feature_id[744].value <=<br>threshold=0.6194809079170227  |
| node_127:<br>feature_name=cg23920016 | feature_id[7139].value <=<br>threshold=0.7449243068695068 |
| node_128:<br>feature_name=cg16521032 | feature_id[5379].value <=<br>threshold=0.8948074877262115 |
| node_129:<br>feature_name=cg09597070 | feature_id[555].value <=<br>threshold=0.67006054520607    |
| node_130:<br>feature_name=cg08411881 | feature_id[3200].value ><br>threshold=0.7572305798530579  |
| Class: sarcoma (SARC)                |                                                           |
|                                      |                                                           |
| Rules_76                             | passed counts:3                                           |
| node_0:<br>feature_name=cg11915444   | feature_id[4116].value ><br>threshold=0.3402601182460785  |
| node_10:<br>feature_name=cg12109728  | feature_id[4182].value ><br>threshold=0.7068270146846771  |
| node_20:<br>feature_name=cg10844382  | feature_id[3856].value ><br>threshold=0.5988894104957581  |
| node_24:<br>feature_name=cg00631702  | feature_id[943].value <=<br>threshold=0.37470583617687225 |
| node_25:<br>feature_name=cg07912144  | feature_id[3075].value ><br>threshold=0.5578519105911255  |
| node_29:<br>feature_name=cg24407065  | feature_id[388].value ><br>threshold=0.5364363789558411   |
| node_33:<br>feature_name=cg15275017  | feature_id[5069].value ><br>threshold=0.4538573920726776  |
| node_51:<br>feature_name=cg07281938  | feature_id[351].value ><br>threshold=0.7506992518901825   |

|                                              |                                                           |
|----------------------------------------------|-----------------------------------------------------------|
| node_73:<br>feature_name=cg17524821          | feature_id[5626].value ><br>threshold=0.4504699558019638  |
| node_75:<br>feature_name=cg02973735          | feature_id[1677].value ><br>threshold=0.29383400082588196 |
| node_77:<br>feature_name=cg23345038          | feature_id[7002].value ><br>threshold=0.6255057156085968  |
| node_79:<br>feature_name=cg17537493          | feature_id[5630].value ><br>threshold=0.5825372636318207  |
| node_85:<br>feature_name=cg12948116          | feature_id[4375].value <=<br>threshold=0.5658791363239288 |
| node_86:<br>feature_name=cg06038180          | feature_id[2529].value ><br>threshold=0.43877437710762024 |
| node_88:<br>feature_name=cg15720017          | feature_id[5175].value ><br>threshold=0.7009969055652618  |
| node_90:<br>feature_name=cg13070215          | feature_id[314].value <=<br>threshold=0.14645694941282272 |
| node_91:<br>feature_name=cg01014262          | feature_id[1082].value <=<br>threshold=0.5737917125225067 |
| node_92:<br>feature_name=cg16863382          | feature_id[5471].value <=<br>threshold=0.7200668156147003 |
| node_93:<br>feature_name=cg18601229          | feature_id[5883].value <=<br>threshold=0.7762220203876495 |
| node_94:<br>feature_name=cg04819180          | feature_id[2191].value ><br>threshold=0.8672285974025726  |
| Class: alveolar rhabdomyosarcoma (RMS (ALV)) |                                                           |
|                                              |                                                           |
| Rules_77                                     | passed counts:3                                           |
| node_0:<br>feature_name=cg11915444           | feature_id[4116].value ><br>threshold=0.3402601182460785  |
| node_10:<br>feature_name=cg12109728          | feature_id[4182].value ><br>threshold=0.7068270146846771  |
| node_20:<br>feature_name=cg10844382          | feature_id[3856].value ><br>threshold=0.5988894104957581  |
| node_24:<br>feature_name=cg00631702          | feature_id[943].value <=<br>threshold=0.37470583617687225 |
| node_25:<br>feature_name=cg07912144          | feature_id[3075].value ><br>threshold=0.5578519105911255  |
| node_29:<br>feature_name=cg24407065          | feature_id[388].value ><br>threshold=0.5364363789558411   |
| node_33:<br>feature_name=cg15275017          | feature_id[5069].value <=<br>threshold=0.4538573920726776 |
| node_34:<br>feature_name=cg08236537          | feature_id[3160].value <=<br>threshold=0.4830351173877716 |

|                                         |                                                           |
|-----------------------------------------|-----------------------------------------------------------|
| node_35:<br>feature_name=cg21591452     | feature_id[6603].value <=<br>threshold=0.878025621175766  |
| node_36:<br>feature_name=cg07368061     | feature_id[2933].value <=<br>threshold=0.6850627958774567 |
| node_37:<br>feature_name=cg21562750     | feature_id[6600].value <=<br>threshold=0.680396169424057  |
| Class: sarcoma (SARC)                   |                                                           |
|                                         |                                                           |
| Rules_78                                | passed counts:2                                           |
| node_0:<br>feature_name=cg11915444      | feature_id[4116].value ><br>threshold=0.3402601182460785  |
| node_10:<br>feature_name=cg12109728     | feature_id[4182].value ><br>threshold=0.7068270146846771  |
| node_20:<br>feature_name=cg10844382     | feature_id[3856].value ><br>threshold=0.5988894104957581  |
| node_24:<br>feature_name=cg00631702     | feature_id[943].value ><br>threshold=0.37470583617687225  |
| node_352:<br>feature_name=cg07027613    | feature_id[549].value <=<br>threshold=0.22842608392238617 |
| node_353:<br>feature_name=cg04356968    | feature_id[2068].value <=<br>threshold=0.728985995054245  |
| node_354:<br>feature_name=cg18259342    | feature_id[5811].value <=<br>threshold=0.1999226212501526 |
| Class: giant cell tumour of bone (GCTB) |                                                           |
|                                         |                                                           |
| Rules_79                                | passed counts:2                                           |
| node_0:<br>feature_name=cg11915444      | feature_id[4116].value ><br>threshold=0.3402601182460785  |
| node_10:<br>feature_name=cg12109728     | feature_id[4182].value ><br>threshold=0.7068270146846771  |
| node_20:<br>feature_name=cg10844382     | feature_id[3856].value ><br>threshold=0.5988894104957581  |
| node_24:<br>feature_name=cg00631702     | feature_id[943].value <=<br>threshold=0.37470583617687225 |
| node_25:<br>feature_name=cg07912144     | feature_id[3075].value ><br>threshold=0.5578519105911255  |
| node_29:<br>feature_name=cg24407065     | feature_id[388].value ><br>threshold=0.5364363789558411   |
| node_33:<br>feature_name=cg15275017     | feature_id[5069].value ><br>threshold=0.4538573920726776  |
| node_51:<br>feature_name=cg07281938     | feature_id[351].value ><br>threshold=0.7506992518901825   |



|                                      |                                                            |
|--------------------------------------|------------------------------------------------------------|
| node_73:<br>feature_name=cg17524821  | feature_id[5626].value ><br>threshold=0.4504699558019638   |
| node_75:<br>feature_name=cg02973735  | feature_id[1677].value ><br>threshold=0.29383400082588196  |
| node_77:<br>feature_name=cg23345038  | feature_id[7002].value ><br>threshold=0.6255057156085968   |
| node_79:<br>feature_name=cg17537493  | feature_id[5630].value ><br>threshold=0.5825372636318207   |
| node_85:<br>feature_name=cg12948116  | feature_id[4375].value <=<br>threshold=0.5658791363239288  |
| node_86:<br>feature_name=cg06038180  | feature_id[2529].value ><br>threshold=0.43877437710762024  |
| node_88:<br>feature_name=cg15720017  | feature_id[5175].value ><br>threshold=0.7009969055652618   |
| node_90:<br>feature_name=cg13070215  | feature_id[314].value ><br>threshold=0.14645694941282272   |
| node_340:<br>feature_name=cg06272543 | feature_id[2590].value <=<br>threshold=0.07370422407984734 |
| node_341:<br>feature_name=cg24268698 | feature_id[7238].value <=<br>threshold=0.9151104986667633  |
| node_342:<br>feature_name=cg12669088 | feature_id[398].value ><br>threshold=0.5310345143079758    |
| Class: leiomyosarcoma (LMS)          |                                                            |
|                                      |                                                            |
| Rules_80                             | passed counts:2                                            |
| node_0:<br>feature_name=cg11915444   | feature_id[4116].value ><br>threshold=0.3402601182460785   |
| node_10:<br>feature_name=cg12109728  | feature_id[4182].value ><br>threshold=0.7068270146846771   |
| node_20:<br>feature_name=cg10844382  | feature_id[3856].value ><br>threshold=0.5988894104957581   |
| node_24:<br>feature_name=cg00631702  | feature_id[943].value <=<br>threshold=0.37470583617687225  |
| node_25:<br>feature_name=cg07912144  | feature_id[3075].value ><br>threshold=0.5578519105911255   |
| node_29:<br>feature_name=cg24407065  | feature_id[388].value ><br>threshold=0.5364363789558411    |
| node_33:<br>feature_name=cg15275017  | feature_id[5069].value ><br>threshold=0.4538573920726776   |
| node_51:<br>feature_name=cg07281938  | feature_id[351].value ><br>threshold=0.7506992518901825    |
| node_73:<br>feature_name=cg17524821  | feature_id[5626].value ><br>threshold=0.4504699558019638   |

|                                            |                                                           |
|--------------------------------------------|-----------------------------------------------------------|
| node_75:<br>feature_name=cg02973735        | feature_id[1677].value ><br>threshold=0.29383400082588196 |
| node_77:<br>feature_name=cg23345038        | feature_id[7002].value ><br>threshold=0.6255057156085968  |
| node_79:<br>feature_name=cg17537493        | feature_id[5630].value ><br>threshold=0.5825372636318207  |
| node_85:<br>feature_name=cg12948116        | feature_id[4375].value <=<br>threshold=0.5658791363239288 |
| node_86:<br>feature_name=cg06038180        | feature_id[2529].value ><br>threshold=0.43877437710762024 |
| node_88:<br>feature_name=cg15720017        | feature_id[5175].value ><br>threshold=0.7009969055652618  |
| node_90:<br>feature_name=cg13070215        | feature_id[314].value <=<br>threshold=0.14645694941282272 |
| node_91:<br>feature_name=cg01014262        | feature_id[1082].value ><br>threshold=0.5737917125225067  |
| node_337:<br>feature_name=cg19909613       | feature_id[6202].value <=<br>threshold=0.8301863670349121 |
| Class: Langerhans cell histiocytosis (LCH) |                                                           |
|                                            |                                                           |
| Rules_81                                   | passed counts:2                                           |
| node_0:<br>feature_name=cg11915444         | feature_id[4116].value ><br>threshold=0.3402601182460785  |
| node_10:<br>feature_name=cg12109728        | feature_id[4182].value ><br>threshold=0.7068270146846771  |
| node_20:<br>feature_name=cg10844382        | feature_id[3856].value ><br>threshold=0.5988894104957581  |
| node_24:<br>feature_name=cg00631702        | feature_id[943].value <=<br>threshold=0.37470583617687225 |
| node_25:<br>feature_name=cg07912144        | feature_id[3075].value ><br>threshold=0.5578519105911255  |
| node_29:<br>feature_name=cg24407065        | feature_id[388].value ><br>threshold=0.5364363789558411   |
| node_33:<br>feature_name=cg15275017        | feature_id[5069].value ><br>threshold=0.4538573920726776  |
| node_51:<br>feature_name=cg07281938        | feature_id[351].value ><br>threshold=0.7506992518901825   |
| node_73:<br>feature_name=cg17524821        | feature_id[5626].value ><br>threshold=0.4504699558019638  |
| node_75:<br>feature_name=cg02973735        | feature_id[1677].value ><br>threshold=0.29383400082588196 |
| node_77:<br>feature_name=cg23345038        | feature_id[7002].value ><br>threshold=0.6255057156085968  |

|                                      |                                                           |
|--------------------------------------|-----------------------------------------------------------|
| node_79:<br>feature_name=cg17537493  | feature_id[5630].value ><br>threshold=0.5825372636318207  |
| node_85:<br>feature_name=cg12948116  | feature_id[4375].value <=<br>threshold=0.5658791363239288 |
| node_86:<br>feature_name=cg06038180  | feature_id[2529].value ><br>threshold=0.43877437710762024 |
| node_88:<br>feature_name=cg15720017  | feature_id[5175].value ><br>threshold=0.7009969055652618  |
| node_90:<br>feature_name=cg13070215  | feature_id[314].value <=<br>threshold=0.14645694941282272 |
| node_91:<br>feature_name=cg01014262  | feature_id[1082].value <=<br>threshold=0.5737917125225067 |
| node_92:<br>feature_name=cg16863382  | feature_id[5471].value ><br>threshold=0.7200668156147003  |
| node_102:<br>feature_name=cg06633739 | feature_id[2686].value ><br>threshold=0.47115950286388397 |
| node_126:<br>feature_name=cg22946562 | feature_id[744].value ><br>threshold=0.6194809079170227   |
| node_170:<br>feature_name=cg12120430 | feature_id[4185].value ><br>threshold=0.5775820016860962  |
| node_172:<br>feature_name=cg02137970 | feature_id[1411].value ><br>threshold=0.6705857813358307  |
| node_196:<br>feature_name=cg03393445 | feature_id[1807].value ><br>threshold=0.4260125905275345  |
| node_218:<br>feature_name=cg23525541 | feature_id[7049].value ><br>threshold=0.4485483318567276  |
| node_222:<br>feature_name=cg10543634 | feature_id[3775].value ><br>threshold=0.29505227506160736 |
| node_224:<br>feature_name=cg07344990 | feature_id[2926].value ><br>threshold=0.5750180780887604  |
| node_226:<br>feature_name=cg10558233 | feature_id[3780].value <=<br>threshold=0.7217690348625183 |
| node_227:<br>feature_name=cg08097359 | feature_id[3116].value ><br>threshold=0.3598180413246155  |
| node_229:<br>feature_name=cg22737001 | feature_id[6843].value <=<br>threshold=0.46281898021698   |
| node_230:<br>feature_name=cg24276624 | feature_id[7242].value ><br>threshold=0.6169979274272919  |
| node_232:<br>feature_name=cg04026354 | feature_id[1982].value ><br>threshold=0.42332448065280914 |
| node_316:<br>feature_name=cg23693485 | feature_id[7083].value ><br>threshold=0.7056963741779327  |
| node_320:<br>feature_name=cg16027775 | feature_id[5238].value ><br>threshold=0.17370137572288513 |

|                                      |                                                           |
|--------------------------------------|-----------------------------------------------------------|
| node_322:<br>feature_name=cg16820411 | feature_id[5464].value ><br>threshold=0.9055586755275726  |
| node_324:<br>feature_name=cg07990658 | feature_id[3094].value <=<br>threshold=0.9101644456386566 |
| Class: Kaposi sarcoma (KS)           |                                                           |
|                                      |                                                           |
| Rules_82                             | passed counts:2                                           |
| node_0:<br>feature_name=cg11915444   | feature_id[4116].value ><br>threshold=0.3402601182460785  |
| node_10:<br>feature_name=cg12109728  | feature_id[4182].value ><br>threshold=0.7068270146846771  |
| node_20:<br>feature_name=cg10844382  | feature_id[3856].value ><br>threshold=0.5988894104957581  |
| node_24:<br>feature_name=cg00631702  | feature_id[943].value <=<br>threshold=0.37470583617687225 |
| node_25:<br>feature_name=cg07912144  | feature_id[3075].value ><br>threshold=0.5578519105911255  |
| node_29:<br>feature_name=cg24407065  | feature_id[388].value ><br>threshold=0.5364363789558411   |
| node_33:<br>feature_name=cg15275017  | feature_id[5069].value ><br>threshold=0.4538573920726776  |
| node_51:<br>feature_name=cg07281938  | feature_id[351].value ><br>threshold=0.7506992518901825   |
| node_73:<br>feature_name=cg17524821  | feature_id[5626].value ><br>threshold=0.4504699558019638  |
| node_75:<br>feature_name=cg02973735  | feature_id[1677].value ><br>threshold=0.29383400082588196 |
| node_77:<br>feature_name=cg23345038  | feature_id[7002].value ><br>threshold=0.6255057156085968  |
| node_79:<br>feature_name=cg17537493  | feature_id[5630].value ><br>threshold=0.5825372636318207  |
| node_85:<br>feature_name=cg12948116  | feature_id[4375].value <=<br>threshold=0.5658791363239288 |
| node_86:<br>feature_name=cg06038180  | feature_id[2529].value ><br>threshold=0.43877437710762024 |
| node_88:<br>feature_name=cg15720017  | feature_id[5175].value ><br>threshold=0.7009969055652618  |
| node_90:<br>feature_name=cg13070215  | feature_id[314].value <=<br>threshold=0.14645694941282272 |
| node_91:<br>feature_name=cg01014262  | feature_id[1082].value <=<br>threshold=0.5737917125225067 |
| node_92:<br>feature_name=cg16863382  | feature_id[5471].value ><br>threshold=0.7200668156147003  |

|                                      |                                                           |
|--------------------------------------|-----------------------------------------------------------|
| node_102:<br>feature_name=cg06633739 | feature_id[2686].value ><br>threshold=0.47115950286388397 |
| node_126:<br>feature_name=cg22946562 | feature_id[744].value ><br>threshold=0.6194809079170227   |
| node_170:<br>feature_name=cg12120430 | feature_id[4185].value ><br>threshold=0.5775820016860962  |
| node_172:<br>feature_name=cg02137970 | feature_id[1411].value ><br>threshold=0.6705857813358307  |
| node_196:<br>feature_name=cg03393445 | feature_id[1807].value ><br>threshold=0.4260125905275345  |
| node_218:<br>feature_name=cg23525541 | feature_id[7049].value ><br>threshold=0.4485483318567276  |
| node_222:<br>feature_name=cg10543634 | feature_id[3775].value ><br>threshold=0.29505227506160736 |
| node_224:<br>feature_name=cg07344990 | feature_id[2926].value ><br>threshold=0.5750180780887604  |
| node_226:<br>feature_name=cg10558233 | feature_id[3780].value <=<br>threshold=0.7217690348625183 |
| node_227:<br>feature_name=cg08097359 | feature_id[3116].value ><br>threshold=0.3598180413246155  |
| node_229:<br>feature_name=cg22737001 | feature_id[6843].value <=<br>threshold=0.46281898021698   |
| node_230:<br>feature_name=cg24276624 | feature_id[7242].value ><br>threshold=0.6169979274272919  |
| node_232:<br>feature_name=cg04026354 | feature_id[1982].value ><br>threshold=0.42332448065280914 |
| node_316:<br>feature_name=cg23693485 | feature_id[7083].value ><br>threshold=0.7056963741779327  |
| node_320:<br>feature_name=cg16027775 | feature_id[5238].value ><br>threshold=0.17370137572288513 |
| node_322:<br>feature_name=cg16820411 | feature_id[5464].value <=<br>threshold=0.9055586755275726 |
| Class: melanoma (MEL)                |                                                           |
|                                      |                                                           |
| Rules_83                             | passed counts:2                                           |
| node_0:<br>feature_name=cg11915444   | feature_id[4116].value ><br>threshold=0.3402601182460785  |
| node_10:<br>feature_name=cg12109728  | feature_id[4182].value ><br>threshold=0.7068270146846771  |
| node_20:<br>feature_name=cg10844382  | feature_id[3856].value ><br>threshold=0.5988894104957581  |
| node_24:<br>feature_name=cg00631702  | feature_id[943].value <=<br>threshold=0.37470583617687225 |

|                                      |                                                           |
|--------------------------------------|-----------------------------------------------------------|
| node_25:<br>feature_name=cg07912144  | feature_id[3075].value ><br>threshold=0.5578519105911255  |
| node_29:<br>feature_name=cg24407065  | feature_id[388].value ><br>threshold=0.5364363789558411   |
| node_33:<br>feature_name=cg15275017  | feature_id[5069].value ><br>threshold=0.4538573920726776  |
| node_51:<br>feature_name=cg07281938  | feature_id[351].value ><br>threshold=0.7506992518901825   |
| node_73:<br>feature_name=cg17524821  | feature_id[5626].value ><br>threshold=0.4504699558019638  |
| node_75:<br>feature_name=cg02973735  | feature_id[1677].value ><br>threshold=0.29383400082588196 |
| node_77:<br>feature_name=cg23345038  | feature_id[7002].value ><br>threshold=0.6255057156085968  |
| node_79:<br>feature_name=cg17537493  | feature_id[5630].value ><br>threshold=0.5825372636318207  |
| node_85:<br>feature_name=cg12948116  | feature_id[4375].value <=<br>threshold=0.5658791363239288 |
| node_86:<br>feature_name=cg06038180  | feature_id[2529].value ><br>threshold=0.43877437710762024 |
| node_88:<br>feature_name=cg15720017  | feature_id[5175].value ><br>threshold=0.7009969055652618  |
| node_90:<br>feature_name=cg13070215  | feature_id[314].value <=<br>threshold=0.14645694941282272 |
| node_91:<br>feature_name=cg01014262  | feature_id[1082].value <=<br>threshold=0.5737917125225067 |
| node_92:<br>feature_name=cg16863382  | feature_id[5471].value ><br>threshold=0.7200668156147003  |
| node_102:<br>feature_name=cg06633739 | feature_id[2686].value ><br>threshold=0.47115950286388397 |
| node_126:<br>feature_name=cg22946562 | feature_id[744].value ><br>threshold=0.6194809079170227   |
| node_170:<br>feature_name=cg12120430 | feature_id[4185].value ><br>threshold=0.5775820016860962  |
| node_172:<br>feature_name=cg02137970 | feature_id[1411].value ><br>threshold=0.6705857813358307  |
| node_196:<br>feature_name=cg03393445 | feature_id[1807].value ><br>threshold=0.4260125905275345  |
| node_218:<br>feature_name=cg23525541 | feature_id[7049].value ><br>threshold=0.4485483318567276  |
| node_222:<br>feature_name=cg10543634 | feature_id[3775].value ><br>threshold=0.29505227506160736 |
| node_224:<br>feature_name=cg07344990 | feature_id[2926].value ><br>threshold=0.5750180780887604  |

|                                      |                                                            |
|--------------------------------------|------------------------------------------------------------|
| node_226:<br>feature_name=cg10558233 | feature_id[3780].value <=<br>threshold=0.7217690348625183  |
| node_227:<br>feature_name=cg08097359 | feature_id[3116].value ><br>threshold=0.3598180413246155   |
| node_229:<br>feature_name=cg22737001 | feature_id[6843].value <=<br>threshold=0.46281898021698    |
| node_230:<br>feature_name=cg24276624 | feature_id[7242].value ><br>threshold=0.6169979274272919   |
| node_232:<br>feature_name=cg04026354 | feature_id[1982].value <=<br>threshold=0.42332448065280914 |
| node_233:<br>feature_name=cg06038180 | feature_id[2529].value ><br>threshold=0.6430551409721375   |
| node_235:<br>feature_name=cg14104252 | feature_id[4735].value ><br>threshold=0.5213949382305145   |
| node_239:<br>feature_name=cg06711298 | feature_id[2707].value ><br>threshold=0.36770085990428925  |
| node_241:<br>feature_name=cg11703722 | feature_id[4056].value ><br>threshold=0.5125315636396408   |
| node_243:<br>feature_name=cg21230793 | feature_id[6514].value ><br>threshold=0.27807849645614624  |
| node_245:<br>feature_name=cg06225767 | feature_id[2575].value ><br>threshold=0.18034886568784714  |
| node_247:<br>feature_name=cg00941576 | feature_id[1053].value ><br>threshold=0.2476368322968483   |
| node_249:<br>feature_name=cg10149889 | feature_id[3676].value ><br>threshold=0.633601188659668    |
| node_257:<br>feature_name=cg07608094 | feature_id[2999].value ><br>threshold=0.7820693254470825   |
| node_259:<br>feature_name=cg03315432 | feature_id[1783].value ><br>threshold=0.6790387332439423   |
| node_261:<br>feature_name=cg07894983 | feature_id[3070].value ><br>threshold=0.3577418476343155   |
| node_263:<br>feature_name=cg15646741 | feature_id[5160].value ><br>threshold=0.2826688587665558   |
| node_273:<br>feature_name=cg09701233 | feature_id[3546].value ><br>threshold=0.5189756155014038   |
| node_275:<br>feature_name=cg09230938 | feature_id[738].value ><br>threshold=0.3108274042606354    |
| node_277:<br>feature_name=cg05334190 | feature_id[2341].value ><br>threshold=0.2764553725719452   |
| node_279:<br>feature_name=cg15617847 | feature_id[5148].value <=<br>threshold=0.05914711393415928 |
| node_280:<br>feature_name=cg00216961 | feature_id[816].value <=<br>threshold=0.42650654911994934  |

|                                                       |                                                           |
|-------------------------------------------------------|-----------------------------------------------------------|
| node_281:<br>feature_name=cg23946462                  | feature_id[7146].value <=<br>threshold=0.9469821751117706 |
| node_282:<br>feature_name=cg06143290                  | feature_id[2554].value <=<br>threshold=0.9263531863689423 |
| node_283:<br>feature_name=cg21528710                  | feature_id[6588].value <=<br>threshold=0.8718287348747253 |
| node_284:<br>feature_name=cg14178043                  | feature_id[4760].value ><br>threshold=0.6852438449859619  |
| Class: high-grade conventional osteosarcoma (OS (HG)) |                                                           |
|                                                       |                                                           |
| Rules_84                                              | passed counts:2                                           |
| node_0:<br>feature_name=cg11915444                    | feature_id[4116].value ><br>threshold=0.3402601182460785  |
| node_10:<br>feature_name=cg12109728                   | feature_id[4182].value ><br>threshold=0.7068270146846771  |
| node_20:<br>feature_name=cg10844382                   | feature_id[3856].value ><br>threshold=0.5988894104957581  |
| node_24:<br>feature_name=cg00631702                   | feature_id[943].value <=<br>threshold=0.37470583617687225 |
| node_25:<br>feature_name=cg07912144                   | feature_id[3075].value ><br>threshold=0.5578519105911255  |
| node_29:<br>feature_name=cg24407065                   | feature_id[388].value ><br>threshold=0.5364363789558411   |
| node_33:<br>feature_name=cg15275017                   | feature_id[5069].value ><br>threshold=0.4538573920726776  |
| node_51:<br>feature_name=cg07281938                   | feature_id[351].value ><br>threshold=0.7506992518901825   |
| node_73:<br>feature_name=cg17524821                   | feature_id[5626].value ><br>threshold=0.4504699558019638  |
| node_75:<br>feature_name=cg02973735                   | feature_id[1677].value ><br>threshold=0.29383400082588196 |
| node_77:<br>feature_name=cg23345038                   | feature_id[7002].value ><br>threshold=0.6255057156085968  |
| node_79:<br>feature_name=cg17537493                   | feature_id[5630].value ><br>threshold=0.5825372636318207  |
| node_85:<br>feature_name=cg12948116                   | feature_id[4375].value <=<br>threshold=0.5658791363239288 |
| node_86:<br>feature_name=cg06038180                   | feature_id[2529].value ><br>threshold=0.43877437710762024 |
| node_88:<br>feature_name=cg15720017                   | feature_id[5175].value ><br>threshold=0.7009969055652618  |
| node_90:<br>feature_name=cg13070215                   | feature_id[314].value <=<br>threshold=0.14645694941282272 |



|                                      |                                                            |
|--------------------------------------|------------------------------------------------------------|
| node_91:<br>feature_name=cg01014262  | feature_id[1082].value <=<br>threshold=0.5737917125225067  |
| node_92:<br>feature_name=cg16863382  | feature_id[5471].value ><br>threshold=0.7200668156147003   |
| node_102:<br>feature_name=cg06633739 | feature_id[2686].value ><br>threshold=0.47115950286388397  |
| node_126:<br>feature_name=cg22946562 | feature_id[744].value ><br>threshold=0.6194809079170227    |
| node_170:<br>feature_name=cg12120430 | feature_id[4185].value ><br>threshold=0.5775820016860962   |
| node_172:<br>feature_name=cg02137970 | feature_id[1411].value ><br>threshold=0.6705857813358307   |
| node_196:<br>feature_name=cg03393445 | feature_id[1807].value ><br>threshold=0.4260125905275345   |
| node_218:<br>feature_name=cg23525541 | feature_id[7049].value ><br>threshold=0.4485483318567276   |
| node_222:<br>feature_name=cg10543634 | feature_id[3775].value ><br>threshold=0.29505227506160736  |
| node_224:<br>feature_name=cg07344990 | feature_id[2926].value ><br>threshold=0.5750180780887604   |
| node_226:<br>feature_name=cg10558233 | feature_id[3780].value <=<br>threshold=0.7217690348625183  |
| node_227:<br>feature_name=cg08097359 | feature_id[3116].value ><br>threshold=0.3598180413246155   |
| node_229:<br>feature_name=cg22737001 | feature_id[6843].value <=<br>threshold=0.46281898021698    |
| node_230:<br>feature_name=cg24276624 | feature_id[7242].value ><br>threshold=0.6169979274272919   |
| node_232:<br>feature_name=cg04026354 | feature_id[1982].value <=<br>threshold=0.42332448065280914 |
| node_233:<br>feature_name=cg06038180 | feature_id[2529].value ><br>threshold=0.6430551409721375   |
| node_235:<br>feature_name=cg14104252 | feature_id[4735].value ><br>threshold=0.5213949382305145   |
| node_239:<br>feature_name=cg06711298 | feature_id[2707].value ><br>threshold=0.36770085990428925  |
| node_241:<br>feature_name=cg11703722 | feature_id[4056].value ><br>threshold=0.5125315636396408   |
| node_243:<br>feature_name=cg21230793 | feature_id[6514].value ><br>threshold=0.27807849645614624  |
| node_245:<br>feature_name=cg06225767 | feature_id[2575].value ><br>threshold=0.18034886568784714  |
| node_247:<br>feature_name=cg00941576 | feature_id[1053].value ><br>threshold=0.2476368322968483   |

|                                      |                                                            |
|--------------------------------------|------------------------------------------------------------|
| node_249:<br>feature_name=cg10149889 | feature_id[3676].value ><br>threshold=0.633601188659668    |
| node_257:<br>feature_name=cg07608094 | feature_id[2999].value ><br>threshold=0.7820693254470825   |
| node_259:<br>feature_name=cg03315432 | feature_id[1783].value ><br>threshold=0.6790387332439423   |
| node_261:<br>feature_name=cg07894983 | feature_id[3070].value ><br>threshold=0.3577418476343155   |
| node_263:<br>feature_name=cg15646741 | feature_id[5160].value ><br>threshold=0.2826688587665558   |
| node_273:<br>feature_name=cg09701233 | feature_id[3546].value ><br>threshold=0.5189756155014038   |
| node_275:<br>feature_name=cg09230938 | feature_id[738].value ><br>threshold=0.3108274042606354    |
| node_277:<br>feature_name=cg05334190 | feature_id[2341].value ><br>threshold=0.2764553725719452   |
| node_279:<br>feature_name=cg15617847 | feature_id[5148].value <=<br>threshold=0.05914711393415928 |
| node_280:<br>feature_name=cg00216961 | feature_id[816].value <=<br>threshold=0.42650654911994934  |
| node_281:<br>feature_name=cg23946462 | feature_id[7146].value <=<br>threshold=0.9469821751117706  |
| node_282:<br>feature_name=cg06143290 | feature_id[2554].value <=<br>threshold=0.9263531863689423  |
| node_283:<br>feature_name=cg21528710 | feature_id[6588].value <=<br>threshold=0.8718287348747253  |
| node_284:<br>feature_name=cg14178043 | feature_id[4760].value <=<br>threshold=0.6852438449859619  |
| node_285:<br>feature_name=cg23906687 | feature_id[7133].value ><br>threshold=0.5761600136756897   |
| node_287:<br>feature_name=cg13838713 | feature_id[4641].value ><br>threshold=0.6983235478401184   |
| node_289:<br>feature_name=cg10239163 | feature_id[3694].value <=<br>threshold=0.49343886971473694 |
| Class: sarcoma (SARC)                |                                                            |
|                                      |                                                            |
| Rules_85                             | passed counts:2                                            |
| node_0:<br>feature_name=cg11915444   | feature_id[4116].value ><br>threshold=0.3402601182460785   |
| node_10:<br>feature_name=cg12109728  | feature_id[4182].value ><br>threshold=0.7068270146846771   |
| node_20:<br>feature_name=cg10844382  | feature_id[3856].value ><br>threshold=0.5988894104957581   |

|                                      |                                                           |
|--------------------------------------|-----------------------------------------------------------|
| node_24:<br>feature_name=cg00631702  | feature_id[943].value <=<br>threshold=0.37470583617687225 |
| node_25:<br>feature_name=cg07912144  | feature_id[3075].value ><br>threshold=0.5578519105911255  |
| node_29:<br>feature_name=cg24407065  | feature_id[388].value ><br>threshold=0.5364363789558411   |
| node_33:<br>feature_name=cg15275017  | feature_id[5069].value ><br>threshold=0.4538573920726776  |
| node_51:<br>feature_name=cg07281938  | feature_id[351].value ><br>threshold=0.7506992518901825   |
| node_73:<br>feature_name=cg17524821  | feature_id[5626].value ><br>threshold=0.4504699558019638  |
| node_75:<br>feature_name=cg02973735  | feature_id[1677].value ><br>threshold=0.29383400082588196 |
| node_77:<br>feature_name=cg23345038  | feature_id[7002].value ><br>threshold=0.6255057156085968  |
| node_79:<br>feature_name=cg17537493  | feature_id[5630].value ><br>threshold=0.5825372636318207  |
| node_85:<br>feature_name=cg12948116  | feature_id[4375].value <=<br>threshold=0.5658791363239288 |
| node_86:<br>feature_name=cg06038180  | feature_id[2529].value ><br>threshold=0.43877437710762024 |
| node_88:<br>feature_name=cg15720017  | feature_id[5175].value ><br>threshold=0.7009969055652618  |
| node_90:<br>feature_name=cg13070215  | feature_id[314].value <=<br>threshold=0.14645694941282272 |
| node_91:<br>feature_name=cg01014262  | feature_id[1082].value <=<br>threshold=0.5737917125225067 |
| node_92:<br>feature_name=cg16863382  | feature_id[5471].value ><br>threshold=0.7200668156147003  |
| node_102:<br>feature_name=cg06633739 | feature_id[2686].value ><br>threshold=0.47115950286388397 |
| node_126:<br>feature_name=cg22946562 | feature_id[744].value ><br>threshold=0.6194809079170227   |
| node_170:<br>feature_name=cg12120430 | feature_id[4185].value ><br>threshold=0.5775820016860962  |
| node_172:<br>feature_name=cg02137970 | feature_id[1411].value ><br>threshold=0.6705857813358307  |
| node_196:<br>feature_name=cg03393445 | feature_id[1807].value ><br>threshold=0.4260125905275345  |
| node_218:<br>feature_name=cg23525541 | feature_id[7049].value ><br>threshold=0.4485483318567276  |
| node_222:<br>feature_name=cg10543634 | feature_id[3775].value ><br>threshold=0.29505227506160736 |

|                                      |                                                            |
|--------------------------------------|------------------------------------------------------------|
| node_224:<br>feature_name=cg07344990 | feature_id[2926].value ><br>threshold=0.5750180780887604   |
| node_226:<br>feature_name=cg10558233 | feature_id[3780].value <=<br>threshold=0.7217690348625183  |
| node_227:<br>feature_name=cg08097359 | feature_id[3116].value ><br>threshold=0.3598180413246155   |
| node_229:<br>feature_name=cg22737001 | feature_id[6843].value <=<br>threshold=0.46281898021698    |
| node_230:<br>feature_name=cg24276624 | feature_id[7242].value ><br>threshold=0.6169979274272919   |
| node_232:<br>feature_name=cg04026354 | feature_id[1982].value <=<br>threshold=0.42332448065280914 |
| node_233:<br>feature_name=cg06038180 | feature_id[2529].value ><br>threshold=0.6430551409721375   |
| node_235:<br>feature_name=cg14104252 | feature_id[4735].value ><br>threshold=0.5213949382305145   |
| node_239:<br>feature_name=cg06711298 | feature_id[2707].value ><br>threshold=0.36770085990428925  |
| node_241:<br>feature_name=cg11703722 | feature_id[4056].value ><br>threshold=0.5125315636396408   |
| node_243:<br>feature_name=cg21230793 | feature_id[6514].value ><br>threshold=0.27807849645614624  |
| node_245:<br>feature_name=cg06225767 | feature_id[2575].value ><br>threshold=0.18034886568784714  |
| node_247:<br>feature_name=cg00941576 | feature_id[1053].value ><br>threshold=0.2476368322968483   |
| node_249:<br>feature_name=cg10149889 | feature_id[3676].value ><br>threshold=0.633601188659668    |
| node_257:<br>feature_name=cg07608094 | feature_id[2999].value ><br>threshold=0.7820693254470825   |
| node_259:<br>feature_name=cg03315432 | feature_id[1783].value ><br>threshold=0.6790387332439423   |
| node_261:<br>feature_name=cg07894983 | feature_id[3070].value ><br>threshold=0.3577418476343155   |
| node_263:<br>feature_name=cg15646741 | feature_id[5160].value ><br>threshold=0.2826688587665558   |
| node_273:<br>feature_name=cg09701233 | feature_id[3546].value ><br>threshold=0.5189756155014038   |
| node_275:<br>feature_name=cg09230938 | feature_id[738].value ><br>threshold=0.3108274042606354    |
| node_277:<br>feature_name=cg05334190 | feature_id[2341].value ><br>threshold=0.2764553725719452   |
| node_279:<br>feature_name=cg15617847 | feature_id[5148].value <=<br>threshold=0.05914711393415928 |

|                                             |                                                           |
|---------------------------------------------|-----------------------------------------------------------|
| node_280:<br>feature_name=cg00216961        | feature_id[816].value <=<br>threshold=0.42650654911994934 |
| node_281:<br>feature_name=cg23946462        | feature_id[7146].value <=<br>threshold=0.9469821751117706 |
| node_282:<br>feature_name=cg06143290        | feature_id[2554].value <=<br>threshold=0.9263531863689423 |
| node_283:<br>feature_name=cg21528710        | feature_id[6588].value <=<br>threshold=0.8718287348747253 |
| node_284:<br>feature_name=cg14178043        | feature_id[4760].value <=<br>threshold=0.6852438449859619 |
| node_285:<br>feature_name=cg23906687        | feature_id[7133].value ><br>threshold=0.5761600136756897  |
| node_287:<br>feature_name=cg13838713        | feature_id[4641].value <=<br>threshold=0.6983235478401184 |
| Class: clear cell chondrosarcoma (CSA (CC)) |                                                           |
|                                             |                                                           |
| Rules_86                                    | passed counts:2                                           |
| node_0:<br>feature_name=cg11915444          | feature_id[4116].value ><br>threshold=0.3402601182460785  |
| node_10:<br>feature_name=cg12109728         | feature_id[4182].value ><br>threshold=0.7068270146846771  |
| node_20:<br>feature_name=cg10844382         | feature_id[3856].value ><br>threshold=0.5988894104957581  |
| node_24:<br>feature_name=cg00631702         | feature_id[943].value <=<br>threshold=0.37470583617687225 |
| node_25:<br>feature_name=cg07912144         | feature_id[3075].value ><br>threshold=0.5578519105911255  |
| node_29:<br>feature_name=cg24407065         | feature_id[388].value ><br>threshold=0.5364363789558411   |
| node_33:<br>feature_name=cg15275017         | feature_id[5069].value ><br>threshold=0.4538573920726776  |
| node_51:<br>feature_name=cg07281938         | feature_id[351].value ><br>threshold=0.7506992518901825   |
| node_73:<br>feature_name=cg17524821         | feature_id[5626].value ><br>threshold=0.4504699558019638  |
| node_75:<br>feature_name=cg02973735         | feature_id[1677].value ><br>threshold=0.29383400082588196 |
| node_77:<br>feature_name=cg23345038         | feature_id[7002].value ><br>threshold=0.6255057156085968  |
| node_79:<br>feature_name=cg17537493         | feature_id[5630].value ><br>threshold=0.5825372636318207  |
| node_85:<br>feature_name=cg12948116         | feature_id[4375].value <=<br>threshold=0.5658791363239288 |

|                                      |                                                            |
|--------------------------------------|------------------------------------------------------------|
| node_86:<br>feature_name=cg06038180  | feature_id[2529].value ><br>threshold=0.43877437710762024  |
| node_88:<br>feature_name=cg15720017  | feature_id[5175].value ><br>threshold=0.7009969055652618   |
| node_90:<br>feature_name=cg13070215  | feature_id[314].value <=<br>threshold=0.14645694941282272  |
| node_91:<br>feature_name=cg01014262  | feature_id[1082].value <=<br>threshold=0.5737917125225067  |
| node_92:<br>feature_name=cg16863382  | feature_id[5471].value ><br>threshold=0.7200668156147003   |
| node_102:<br>feature_name=cg06633739 | feature_id[2686].value ><br>threshold=0.47115950286388397  |
| node_126:<br>feature_name=cg22946562 | feature_id[744].value ><br>threshold=0.6194809079170227    |
| node_170:<br>feature_name=cg12120430 | feature_id[4185].value ><br>threshold=0.5775820016860962   |
| node_172:<br>feature_name=cg02137970 | feature_id[1411].value ><br>threshold=0.6705857813358307   |
| node_196:<br>feature_name=cg03393445 | feature_id[1807].value ><br>threshold=0.4260125905275345   |
| node_218:<br>feature_name=cg23525541 | feature_id[7049].value ><br>threshold=0.4485483318567276   |
| node_222:<br>feature_name=cg10543634 | feature_id[3775].value ><br>threshold=0.29505227506160736  |
| node_224:<br>feature_name=cg07344990 | feature_id[2926].value ><br>threshold=0.5750180780887604   |
| node_226:<br>feature_name=cg10558233 | feature_id[3780].value <=<br>threshold=0.7217690348625183  |
| node_227:<br>feature_name=cg08097359 | feature_id[3116].value ><br>threshold=0.3598180413246155   |
| node_229:<br>feature_name=cg22737001 | feature_id[6843].value <=<br>threshold=0.46281898021698    |
| node_230:<br>feature_name=cg24276624 | feature_id[7242].value ><br>threshold=0.6169979274272919   |
| node_232:<br>feature_name=cg04026354 | feature_id[1982].value <=<br>threshold=0.42332448065280914 |
| node_233:<br>feature_name=cg06038180 | feature_id[2529].value ><br>threshold=0.6430551409721375   |
| node_235:<br>feature_name=cg14104252 | feature_id[4735].value ><br>threshold=0.5213949382305145   |
| node_239:<br>feature_name=cg06711298 | feature_id[2707].value ><br>threshold=0.36770085990428925  |
| node_241:<br>feature_name=cg11703722 | feature_id[4056].value ><br>threshold=0.5125315636396408   |

|                                               |                                                            |
|-----------------------------------------------|------------------------------------------------------------|
| node_243:<br>feature_name=cg21230793          | feature_id[6514].value ><br>threshold=0.27807849645614624  |
| node_245:<br>feature_name=cg06225767          | feature_id[2575].value ><br>threshold=0.18034886568784714  |
| node_247:<br>feature_name=cg00941576          | feature_id[1053].value ><br>threshold=0.2476368322968483   |
| node_249:<br>feature_name=cg10149889          | feature_id[3676].value ><br>threshold=0.633601188659668    |
| node_257:<br>feature_name=cg07608094          | feature_id[2999].value ><br>threshold=0.7820693254470825   |
| node_259:<br>feature_name=cg03315432          | feature_id[1783].value ><br>threshold=0.6790387332439423   |
| node_261:<br>feature_name=cg07894983          | feature_id[3070].value ><br>threshold=0.3577418476343155   |
| node_263:<br>feature_name=cg15646741          | feature_id[5160].value ><br>threshold=0.2826688587665558   |
| node_273:<br>feature_name=cg09701233          | feature_id[3546].value ><br>threshold=0.5189756155014038   |
| node_275:<br>feature_name=cg09230938          | feature_id[738].value ><br>threshold=0.3108274042606354    |
| node_277:<br>feature_name=cg05334190          | feature_id[2341].value ><br>threshold=0.2764553725719452   |
| node_279:<br>feature_name=cg15617847          | feature_id[5148].value <=<br>threshold=0.05914711393415928 |
| node_280:<br>feature_name=cg00216961          | feature_id[816].value <=<br>threshold=0.42650654911994934  |
| node_281:<br>feature_name=cg23946462          | feature_id[7146].value <=<br>threshold=0.9469821751117706  |
| node_282:<br>feature_name=cg06143290          | feature_id[2554].value <=<br>threshold=0.9263531863689423  |
| node_283:<br>feature_name=cg21528710          | feature_id[6588].value <=<br>threshold=0.8718287348747253  |
| node_284:<br>feature_name=cg14178043          | feature_id[4760].value <=<br>threshold=0.6852438449859619  |
| node_285:<br>feature_name=cg23906687          | feature_id[7133].value <=<br>threshold=0.5761600136756897  |
| Class: mesenchymal chondrosarcoma (CSA (MES)) |                                                            |
|                                               |                                                            |
| Rules_87                                      | passed counts:2                                            |
| node_0:<br>feature_name=cg11915444            | feature_id[4116].value ><br>threshold=0.3402601182460785   |
| node_10:<br>feature_name=cg12109728           | feature_id[4182].value ><br>threshold=0.7068270146846771   |

|                                      |                                                           |
|--------------------------------------|-----------------------------------------------------------|
| node_20:<br>feature_name=cg10844382  | feature_id[3856].value ><br>threshold=0.5988894104957581  |
| node_24:<br>feature_name=cg00631702  | feature_id[943].value <=<br>threshold=0.37470583617687225 |
| node_25:<br>feature_name=cg07912144  | feature_id[3075].value ><br>threshold=0.5578519105911255  |
| node_29:<br>feature_name=cg24407065  | feature_id[388].value ><br>threshold=0.5364363789558411   |
| node_33:<br>feature_name=cg15275017  | feature_id[5069].value ><br>threshold=0.4538573920726776  |
| node_51:<br>feature_name=cg07281938  | feature_id[351].value ><br>threshold=0.7506992518901825   |
| node_73:<br>feature_name=cg17524821  | feature_id[5626].value ><br>threshold=0.4504699558019638  |
| node_75:<br>feature_name=cg02973735  | feature_id[1677].value ><br>threshold=0.29383400082588196 |
| node_77:<br>feature_name=cg23345038  | feature_id[7002].value ><br>threshold=0.6255057156085968  |
| node_79:<br>feature_name=cg17537493  | feature_id[5630].value ><br>threshold=0.5825372636318207  |
| node_85:<br>feature_name=cg12948116  | feature_id[4375].value <=<br>threshold=0.5658791363239288 |
| node_86:<br>feature_name=cg06038180  | feature_id[2529].value ><br>threshold=0.43877437710762024 |
| node_88:<br>feature_name=cg15720017  | feature_id[5175].value ><br>threshold=0.7009969055652618  |
| node_90:<br>feature_name=cg13070215  | feature_id[314].value <=<br>threshold=0.14645694941282272 |
| node_91:<br>feature_name=cg01014262  | feature_id[1082].value <=<br>threshold=0.5737917125225067 |
| node_92:<br>feature_name=cg16863382  | feature_id[5471].value ><br>threshold=0.7200668156147003  |
| node_102:<br>feature_name=cg06633739 | feature_id[2686].value ><br>threshold=0.47115950286388397 |
| node_126:<br>feature_name=cg22946562 | feature_id[744].value ><br>threshold=0.6194809079170227   |
| node_170:<br>feature_name=cg12120430 | feature_id[4185].value ><br>threshold=0.5775820016860962  |
| node_172:<br>feature_name=cg02137970 | feature_id[1411].value ><br>threshold=0.6705857813358307  |
| node_196:<br>feature_name=cg03393445 | feature_id[1807].value <=<br>threshold=0.4260125905275345 |
| node_197:<br>feature_name=cg01297744 | feature_id[1157].value ><br>threshold=0.8005762100219727  |



|                                      |                                                           |
|--------------------------------------|-----------------------------------------------------------|
| node_211:<br>feature_name=cg14401746 | feature_id[4834].value ><br>threshold=0.3708716481924057  |
| node_213:<br>feature_name=cg22060153 | feature_id[6700].value ><br>threshold=0.7927507758140564  |
| Class: Ewing sarcoma (EWING)         |                                                           |
|                                      |                                                           |
| Rules_88                             | passed counts:2                                           |
| node_0:<br>feature_name=cg11915444   | feature_id[4116].value ><br>threshold=0.3402601182460785  |
| node_10:<br>feature_name=cg12109728  | feature_id[4182].value ><br>threshold=0.7068270146846771  |
| node_20:<br>feature_name=cg10844382  | feature_id[3856].value ><br>threshold=0.5988894104957581  |
| node_24:<br>feature_name=cg00631702  | feature_id[943].value <=<br>threshold=0.37470583617687225 |
| node_25:<br>feature_name=cg07912144  | feature_id[3075].value ><br>threshold=0.5578519105911255  |
| node_29:<br>feature_name=cg24407065  | feature_id[388].value ><br>threshold=0.5364363789558411   |
| node_33:<br>feature_name=cg15275017  | feature_id[5069].value ><br>threshold=0.4538573920726776  |
| node_51:<br>feature_name=cg07281938  | feature_id[351].value ><br>threshold=0.7506992518901825   |
| node_73:<br>feature_name=cg17524821  | feature_id[5626].value ><br>threshold=0.4504699558019638  |
| node_75:<br>feature_name=cg02973735  | feature_id[1677].value ><br>threshold=0.29383400082588196 |
| node_77:<br>feature_name=cg23345038  | feature_id[7002].value ><br>threshold=0.6255057156085968  |
| node_79:<br>feature_name=cg17537493  | feature_id[5630].value ><br>threshold=0.5825372636318207  |
| node_85:<br>feature_name=cg12948116  | feature_id[4375].value <=<br>threshold=0.5658791363239288 |
| node_86:<br>feature_name=cg06038180  | feature_id[2529].value ><br>threshold=0.43877437710762024 |
| node_88:<br>feature_name=cg15720017  | feature_id[5175].value ><br>threshold=0.7009969055652618  |
| node_90:<br>feature_name=cg13070215  | feature_id[314].value <=<br>threshold=0.14645694941282272 |
| node_91:<br>feature_name=cg01014262  | feature_id[1082].value <=<br>threshold=0.5737917125225067 |
| node_92:<br>feature_name=cg16863382  | feature_id[5471].value ><br>threshold=0.7200668156147003  |

|                                      |                                                            |
|--------------------------------------|------------------------------------------------------------|
| node_102:<br>feature_name=cg06633739 | feature_id[2686].value ><br>threshold=0.47115950286388397  |
| node_126:<br>feature_name=cg22946562 | feature_id[744].value ><br>threshold=0.6194809079170227    |
| node_170:<br>feature_name=cg12120430 | feature_id[4185].value ><br>threshold=0.5775820016860962   |
| node_172:<br>feature_name=cg02137970 | feature_id[1411].value <=<br>threshold=0.6705857813358307  |
| node_173:<br>feature_name=cg16185457 | feature_id[5282].value ><br>threshold=0.5055856853723526   |
| node_183:<br>feature_name=cg04993279 | feature_id[2243].value <=<br>threshold=0.46021124720573425 |
| node_184:<br>feature_name=cg04655520 | feature_id[2141].value <=<br>threshold=0.08191334456205368 |
| node_185:<br>feature_name=cg11103999 | feature_id[3923].value <=<br>threshold=0.8651433885097504  |
| Class: rhabdomyosarcoma (RMS)        |                                                            |
|                                      |                                                            |
| Rules_89                             | passed counts:2                                            |
| node_0:<br>feature_name=cg11915444   | feature_id[4116].value ><br>threshold=0.3402601182460785   |
| node_10:<br>feature_name=cg12109728  | feature_id[4182].value ><br>threshold=0.7068270146846771   |
| node_20:<br>feature_name=cg10844382  | feature_id[3856].value ><br>threshold=0.5988894104957581   |
| node_24:<br>feature_name=cg00631702  | feature_id[943].value <=<br>threshold=0.37470583617687225  |
| node_25:<br>feature_name=cg07912144  | feature_id[3075].value ><br>threshold=0.5578519105911255   |
| node_29:<br>feature_name=cg24407065  | feature_id[388].value ><br>threshold=0.5364363789558411    |
| node_33:<br>feature_name=cg15275017  | feature_id[5069].value ><br>threshold=0.4538573920726776   |
| node_51:<br>feature_name=cg07281938  | feature_id[351].value ><br>threshold=0.7506992518901825    |
| node_73:<br>feature_name=cg17524821  | feature_id[5626].value ><br>threshold=0.4504699558019638   |
| node_75:<br>feature_name=cg02973735  | feature_id[1677].value ><br>threshold=0.29383400082588196  |
| node_77:<br>feature_name=cg23345038  | feature_id[7002].value ><br>threshold=0.6255057156085968   |
| node_79:<br>feature_name=cg17537493  | feature_id[5630].value ><br>threshold=0.5825372636318207   |

|                                                 |                                                           |
|-------------------------------------------------|-----------------------------------------------------------|
| node_85:<br>feature_name=cg12948116             | feature_id[4375].value <=<br>threshold=0.5658791363239288 |
| node_86:<br>feature_name=cg06038180             | feature_id[2529].value ><br>threshold=0.43877437710762024 |
| node_88:<br>feature_name=cg15720017             | feature_id[5175].value ><br>threshold=0.7009969055652618  |
| node_90:<br>feature_name=cg13070215             | feature_id[314].value <=<br>threshold=0.14645694941282272 |
| node_91:<br>feature_name=cg01014262             | feature_id[1082].value <=<br>threshold=0.5737917125225067 |
| node_92:<br>feature_name=cg16863382             | feature_id[5471].value ><br>threshold=0.7200668156147003  |
| node_102:<br>feature_name=cg06633739            | feature_id[2686].value ><br>threshold=0.47115950286388397 |
| node_126:<br>feature_name=cg22946562            | feature_id[744].value <=<br>threshold=0.6194809079170227  |
| node_127:<br>feature_name=cg23920016            | feature_id[7139].value ><br>threshold=0.7449243068695068  |
| node_151:<br>feature_name=cg21617218            | feature_id[6608].value ><br>threshold=0.8795748353004456  |
| node_153:<br>feature_name=cg01663970            | feature_id[1273].value ><br>threshold=0.8442256152629852  |
| node_155:<br>feature_name=cg00686915            | feature_id[965].value ><br>threshold=0.20000632852315903  |
| node_157:<br>feature_name=cg11628781            | feature_id[4033].value ><br>threshold=0.9032271206378937  |
| Class: sclerosing epithelioid fibrosarcoma(SEF) |                                                           |
|                                                 |                                                           |
| Rules_90                                        | passed counts:2                                           |
| node_0:<br>feature_name=cg11915444              | feature_id[4116].value ><br>threshold=0.3402601182460785  |
| node_10:<br>feature_name=cg12109728             | feature_id[4182].value ><br>threshold=0.7068270146846771  |
| node_20:<br>feature_name=cg10844382             | feature_id[3856].value ><br>threshold=0.5988894104957581  |
| node_24:<br>feature_name=cg00631702             | feature_id[943].value <=<br>threshold=0.37470583617687225 |
| node_25:<br>feature_name=cg07912144             | feature_id[3075].value ><br>threshold=0.5578519105911255  |
| node_29:<br>feature_name=cg24407065             | feature_id[388].value ><br>threshold=0.5364363789558411   |
| node_33:<br>feature_name=cg15275017             | feature_id[5069].value ><br>threshold=0.4538573920726776  |

|                                      |                                                           |
|--------------------------------------|-----------------------------------------------------------|
| node_51:<br>feature_name=cg07281938  | feature_id[351].value ><br>threshold=0.7506992518901825   |
| node_73:<br>feature_name=cg17524821  | feature_id[5626].value ><br>threshold=0.4504699558019638  |
| node_75:<br>feature_name=cg02973735  | feature_id[1677].value ><br>threshold=0.29383400082588196 |
| node_77:<br>feature_name=cg23345038  | feature_id[7002].value ><br>threshold=0.6255057156085968  |
| node_79:<br>feature_name=cg17537493  | feature_id[5630].value ><br>threshold=0.5825372636318207  |
| node_85:<br>feature_name=cg12948116  | feature_id[4375].value <=<br>threshold=0.5658791363239288 |
| node_86:<br>feature_name=cg06038180  | feature_id[2529].value ><br>threshold=0.43877437710762024 |
| node_88:<br>feature_name=cg15720017  | feature_id[5175].value ><br>threshold=0.7009969055652618  |
| node_90:<br>feature_name=cg13070215  | feature_id[314].value <=<br>threshold=0.14645694941282272 |
| node_91:<br>feature_name=cg01014262  | feature_id[1082].value <=<br>threshold=0.5737917125225067 |
| node_92:<br>feature_name=cg16863382  | feature_id[5471].value ><br>threshold=0.7200668156147003  |
| node_102:<br>feature_name=cg06633739 | feature_id[2686].value ><br>threshold=0.47115950286388397 |
| node_126:<br>feature_name=cg22946562 | feature_id[744].value <=<br>threshold=0.6194809079170227  |
| node_127:<br>feature_name=cg23920016 | feature_id[7139].value <=<br>threshold=0.7449243068695068 |
| node_128:<br>feature_name=cg16521032 | feature_id[5379].value ><br>threshold=0.8948074877262115  |
| node_136:<br>feature_name=cg22345063 | feature_id[6755].value ><br>threshold=0.38597847521305084 |
| node_144:<br>feature_name=cg05650238 | feature_id[2427].value ><br>threshold=0.7126822769641876  |
| Class: epithelioid sarcoma (ES)      |                                                           |
|                                      |                                                           |
| Rules_91                             | passed counts:2                                           |
| node_0:<br>feature_name=cg11915444   | feature_id[4116].value ><br>threshold=0.3402601182460785  |
| node_10:<br>feature_name=cg12109728  | feature_id[4182].value ><br>threshold=0.7068270146846771  |
| node_20:<br>feature_name=cg10844382  | feature_id[3856].value ><br>threshold=0.5988894104957581  |

|                                               |                                                           |
|-----------------------------------------------|-----------------------------------------------------------|
| node_24:<br>feature_name=cg00631702           | feature_id[943].value <=<br>threshold=0.37470583617687225 |
| node_25:<br>feature_name=cg07912144           | feature_id[3075].value ><br>threshold=0.5578519105911255  |
| node_29:<br>feature_name=cg24407065           | feature_id[388].value ><br>threshold=0.5364363789558411   |
| node_33:<br>feature_name=cg15275017           | feature_id[5069].value ><br>threshold=0.4538573920726776  |
| node_51:<br>feature_name=cg07281938           | feature_id[351].value ><br>threshold=0.7506992518901825   |
| node_73:<br>feature_name=cg17524821           | feature_id[5626].value ><br>threshold=0.4504699558019638  |
| node_75:<br>feature_name=cg02973735           | feature_id[1677].value ><br>threshold=0.29383400082588196 |
| node_77:<br>feature_name=cg23345038           | feature_id[7002].value ><br>threshold=0.6255057156085968  |
| node_79:<br>feature_name=cg17537493           | feature_id[5630].value ><br>threshold=0.5825372636318207  |
| node_85:<br>feature_name=cg12948116           | feature_id[4375].value <=<br>threshold=0.5658791363239288 |
| node_86:<br>feature_name=cg06038180           | feature_id[2529].value ><br>threshold=0.43877437710762024 |
| node_88:<br>feature_name=cg15720017           | feature_id[5175].value ><br>threshold=0.7009969055652618  |
| node_90:<br>feature_name=cg13070215           | feature_id[314].value <=<br>threshold=0.14645694941282272 |
| node_91:<br>feature_name=cg01014262           | feature_id[1082].value <=<br>threshold=0.5737917125225067 |
| node_92:<br>feature_name=cg16863382           | feature_id[5471].value <=<br>threshold=0.7200668156147003 |
| node_93:<br>feature_name=cg18601229           | feature_id[5883].value <=<br>threshold=0.7762220203876495 |
| node_94:<br>feature_name=cg04819180           | feature_id[2191].value <=<br>threshold=0.8672285974025726 |
| node_95:<br>feature_name=cg09370702           | feature_id[3456].value ><br>threshold=0.8020930886268616  |
| node_97:<br>feature_name=cg08625990           | feature_id[3258].value <=<br>threshold=0.8129918575286865 |
| Class: embryonal rhabdomyosarcoma (RMS (EMB)) |                                                           |
|                                               |                                                           |
| Rules_92                                      | passed counts:2                                           |
| node_0:<br>feature_name=cg11915444            | feature_id[4116].value ><br>threshold=0.3402601182460785  |

|                                         |                                                           |
|-----------------------------------------|-----------------------------------------------------------|
| node_10:<br>feature_name=cg12109728     | feature_id[4182].value ><br>threshold=0.7068270146846771  |
| node_20:<br>feature_name=cg10844382     | feature_id[3856].value ><br>threshold=0.5988894104957581  |
| node_24:<br>feature_name=cg00631702     | feature_id[943].value <=<br>threshold=0.37470583617687225 |
| node_25:<br>feature_name=cg07912144     | feature_id[3075].value ><br>threshold=0.5578519105911255  |
| node_29:<br>feature_name=cg24407065     | feature_id[388].value ><br>threshold=0.5364363789558411   |
| node_33:<br>feature_name=cg15275017     | feature_id[5069].value ><br>threshold=0.4538573920726776  |
| node_51:<br>feature_name=cg07281938     | feature_id[351].value ><br>threshold=0.7506992518901825   |
| node_73:<br>feature_name=cg17524821     | feature_id[5626].value ><br>threshold=0.4504699558019638  |
| node_75:<br>feature_name=cg02973735     | feature_id[1677].value ><br>threshold=0.29383400082588196 |
| node_77:<br>feature_name=cg23345038     | feature_id[7002].value ><br>threshold=0.6255057156085968  |
| node_79:<br>feature_name=cg17537493     | feature_id[5630].value ><br>threshold=0.5825372636318207  |
| node_85:<br>feature_name=cg12948116     | feature_id[4375].value <=<br>threshold=0.5658791363239288 |
| node_86:<br>feature_name=cg06038180     | feature_id[2529].value ><br>threshold=0.43877437710762024 |
| node_88:<br>feature_name=cg15720017     | feature_id[5175].value ><br>threshold=0.7009969055652618  |
| node_90:<br>feature_name=cg13070215     | feature_id[314].value <=<br>threshold=0.14645694941282272 |
| node_91:<br>feature_name=cg01014262     | feature_id[1082].value <=<br>threshold=0.5737917125225067 |
| node_92:<br>feature_name=cg16863382     | feature_id[5471].value <=<br>threshold=0.7200668156147003 |
| node_93:<br>feature_name=cg18601229     | feature_id[5883].value <=<br>threshold=0.7762220203876495 |
| node_94:<br>feature_name=cg04819180     | feature_id[2191].value <=<br>threshold=0.8672285974025726 |
| node_95:<br>feature_name=cg09370702     | feature_id[3456].value <=<br>threshold=0.8020930886268616 |
| Class: undifferentiated sarcoma (USARC) |                                                           |
|                                         |                                                           |
| Rules_93                                | passed counts:2                                           |

|                                              |                                                            |
|----------------------------------------------|------------------------------------------------------------|
| node_0:<br>feature_name=cg11915444           | feature_id[4116].value ><br>threshold=0.3402601182460785   |
| node_10:<br>feature_name=cg12109728          | feature_id[4182].value ><br>threshold=0.7068270146846771   |
| node_20:<br>feature_name=cg10844382          | feature_id[3856].value ><br>threshold=0.5988894104957581   |
| node_24:<br>feature_name=cg00631702          | feature_id[943].value <=<br>threshold=0.37470583617687225  |
| node_25:<br>feature_name=cg07912144          | feature_id[3075].value ><br>threshold=0.5578519105911255   |
| node_29:<br>feature_name=cg24407065          | feature_id[388].value ><br>threshold=0.5364363789558411    |
| node_33:<br>feature_name=cg15275017          | feature_id[5069].value ><br>threshold=0.4538573920726776   |
| node_51:<br>feature_name=cg07281938          | feature_id[351].value <=<br>threshold=0.7506992518901825   |
| node_52:<br>feature_name=cg21189849          | feature_id[6504].value <=<br>threshold=0.7545044124126434  |
| node_53:<br>feature_name=cg11717552          | feature_id[4060].value <=<br>threshold=0.8407479226589203  |
| node_54:<br>feature_name=cg07043952          | feature_id[2823].value ><br>threshold=0.8715284764766693   |
| Class: clear cell chondrosarcoma (CSA (CC))  |                                                            |
|                                              |                                                            |
| Rules_94                                     | passed counts:2                                            |
| node_0:<br>feature_name=cg11915444           | feature_id[4116].value ><br>threshold=0.3402601182460785   |
| node_10:<br>feature_name=cg12109728          | feature_id[4182].value <=<br>threshold=0.7068270146846771  |
| node_11:<br>feature_name=cg23902076          | feature_id[7131].value ><br>threshold=0.8691235482692719   |
| node_13:<br>feature_name=cg20099458          | feature_id[6250].value ><br>threshold=0.7871655821800232   |
| Class: synovial sarcoma (SYSA)               |                                                            |
|                                              |                                                            |
| Rules_95                                     | passed counts:2                                            |
| node_0:<br>feature_name=cg11915444           | feature_id[4116].value <=<br>threshold=0.3402601182460785  |
| node_1:<br>feature_name=cg00982952           | feature_id[1071].value ><br>threshold=0.7386334538459778   |
| node_3:<br>feature_name=cg22315164           | feature_id[6749].value <=<br>threshold=0.35902709513902664 |
| Class: alveolar rhabdomyosarcoma (RMS (ALV)) |                                                            |

|                                         |                                                           |
|-----------------------------------------|-----------------------------------------------------------|
|                                         |                                                           |
| Rules_96                                | passed counts:1                                           |
| node_0:<br>feature_name=cg11915444      | feature_id[4116].value ><br>threshold=0.3402601182460785  |
| node_10:<br>feature_name=cg12109728     | feature_id[4182].value ><br>threshold=0.7068270146846771  |
| node_20:<br>feature_name=cg10844382     | feature_id[3856].value ><br>threshold=0.5988894104957581  |
| node_24:<br>feature_name=cg00631702     | feature_id[943].value ><br>threshold=0.37470583617687225  |
| node_352:<br>feature_name=cg07027613    | feature_id[549].value ><br>threshold=0.22842608392238617  |
| node_360:<br>feature_name=cg18406924    | feature_id[5844].value <=<br>threshold=0.3586410731077194 |
| Class: epithelioid sarcoma (ES)         |                                                           |
|                                         |                                                           |
| Rules_97                                | passed counts:1                                           |
| node_0:<br>feature_name=cg11915444      | feature_id[4116].value ><br>threshold=0.3402601182460785  |
| node_10:<br>feature_name=cg12109728     | feature_id[4182].value ><br>threshold=0.7068270146846771  |
| node_20:<br>feature_name=cg10844382     | feature_id[3856].value ><br>threshold=0.5988894104957581  |
| node_24:<br>feature_name=cg00631702     | feature_id[943].value ><br>threshold=0.37470583617687225  |
| node_352:<br>feature_name=cg07027613    | feature_id[549].value <=<br>threshold=0.22842608392238617 |
| node_353:<br>feature_name=cg04356968    | feature_id[2068].value <=<br>threshold=0.728985995054245  |
| node_354:<br>feature_name=cg18259342    | feature_id[5811].value ><br>threshold=0.1999226212501526  |
| node_356:<br>feature_name=cg04091816    | feature_id[641].value ><br>threshold=0.7511296272277832   |
| Class: undifferentiated sarcoma (USARC) |                                                           |
|                                         |                                                           |
| Rules_98                                | passed counts:1                                           |
| node_0:<br>feature_name=cg11915444      | feature_id[4116].value ><br>threshold=0.3402601182460785  |
| node_10:<br>feature_name=cg12109728     | feature_id[4182].value ><br>threshold=0.7068270146846771  |
| node_20:<br>feature_name=cg10844382     | feature_id[3856].value ><br>threshold=0.5988894104957581  |



|                                      |                                                           |
|--------------------------------------|-----------------------------------------------------------|
| node_24:<br>feature_name=cg00631702  | feature_id[943].value ><br>threshold=0.37470583617687225  |
| node_352:<br>feature_name=cg07027613 | feature_id[549].value <=<br>threshold=0.22842608392238617 |
| node_353:<br>feature_name=cg04356968 | feature_id[2068].value <=<br>threshold=0.728985995054245  |
| node_354:<br>feature_name=cg18259342 | feature_id[5811].value ><br>threshold=0.1999226212501526  |
| node_356:<br>feature_name=cg04091816 | feature_id[641].value <=<br>threshold=0.7511296272277832  |
| Class: chondrosarcoma (CSA)          |                                                           |
|                                      |                                                           |
| Rules_99                             | passed counts:1                                           |
| node_0:<br>feature_name=cg11915444   | feature_id[4116].value ><br>threshold=0.3402601182460785  |
| node_10:<br>feature_name=cg12109728  | feature_id[4182].value ><br>threshold=0.7068270146846771  |
| node_20:<br>feature_name=cg10844382  | feature_id[3856].value ><br>threshold=0.5988894104957581  |
| node_24:<br>feature_name=cg00631702  | feature_id[943].value <=<br>threshold=0.37470583617687225 |
| node_25:<br>feature_name=cg07912144  | feature_id[3075].value ><br>threshold=0.5578519105911255  |
| node_29:<br>feature_name=cg24407065  | feature_id[388].value ><br>threshold=0.5364363789558411   |
| node_33:<br>feature_name=cg15275017  | feature_id[5069].value ><br>threshold=0.4538573920726776  |
| node_51:<br>feature_name=cg07281938  | feature_id[351].value ><br>threshold=0.7506992518901825   |
| node_73:<br>feature_name=cg17524821  | feature_id[5626].value ><br>threshold=0.4504699558019638  |
| node_75:<br>feature_name=cg02973735  | feature_id[1677].value ><br>threshold=0.29383400082588196 |
| node_77:<br>feature_name=cg23345038  | feature_id[7002].value ><br>threshold=0.6255057156085968  |
| node_79:<br>feature_name=cg17537493  | feature_id[5630].value ><br>threshold=0.5825372636318207  |
| node_85:<br>feature_name=cg12948116  | feature_id[4375].value ><br>threshold=0.5658791363239288  |
| node_347:<br>feature_name=cg15262242 | feature_id[5064].value ><br>threshold=0.36207813024520874 |
| node_349:<br>feature_name=cg13658093 | feature_id[4574].value ><br>threshold=0.6347142904996872  |

|                                                         |                                                           |
|---------------------------------------------------------|-----------------------------------------------------------|
| Class: malignant peripheral nerve sheath tumour (MPNST) |                                                           |
|                                                         |                                                           |
| Rules_100                                               | passed counts:1                                           |
| node_0:<br>feature_name=cg11915444                      | feature_id[4116].value ><br>threshold=0.3402601182460785  |
| node_10:<br>feature_name=cg12109728                     | feature_id[4182].value ><br>threshold=0.7068270146846771  |
| node_20:<br>feature_name=cg10844382                     | feature_id[3856].value ><br>threshold=0.5988894104957581  |
| node_24:<br>feature_name=cg00631702                     | feature_id[943].value <=<br>threshold=0.37470583617687225 |
| node_25:<br>feature_name=cg07912144                     | feature_id[3075].value ><br>threshold=0.5578519105911255  |
| node_29:<br>feature_name=cg24407065                     | feature_id[388].value ><br>threshold=0.5364363789558411   |
| node_33:<br>feature_name=cg15275017                     | feature_id[5069].value ><br>threshold=0.4538573920726776  |
| node_51:<br>feature_name=cg07281938                     | feature_id[351].value ><br>threshold=0.7506992518901825   |
| node_73:<br>feature_name=cg17524821                     | feature_id[5626].value ><br>threshold=0.4504699558019638  |
| node_75:<br>feature_name=cg02973735                     | feature_id[1677].value ><br>threshold=0.29383400082588196 |
| node_77:<br>feature_name=cg23345038                     | feature_id[7002].value ><br>threshold=0.6255057156085968  |
| node_79:<br>feature_name=cg17537493                     | feature_id[5630].value ><br>threshold=0.5825372636318207  |
| node_85:<br>feature_name=cg12948116                     | feature_id[4375].value ><br>threshold=0.5658791363239288  |
| node_347:<br>feature_name=cg15262242                    | feature_id[5064].value ><br>threshold=0.36207813024520874 |
| node_349:<br>feature_name=cg13658093                    | feature_id[4574].value <=<br>threshold=0.6347142904996872 |
| Class: malignant rhabdoid tumour (MRT)                  |                                                           |
|                                                         |                                                           |
| Rules_101                                               | passed counts:1                                           |
| node_0:<br>feature_name=cg11915444                      | feature_id[4116].value ><br>threshold=0.3402601182460785  |
| node_10:<br>feature_name=cg12109728                     | feature_id[4182].value ><br>threshold=0.7068270146846771  |
| node_20:<br>feature_name=cg10844382                     | feature_id[3856].value ><br>threshold=0.5988894104957581  |

|                                      |                                                            |
|--------------------------------------|------------------------------------------------------------|
| node_24:<br>feature_name=cg00631702  | feature_id[943].value <=<br>threshold=0.37470583617687225  |
| node_25:<br>feature_name=cg07912144  | feature_id[3075].value ><br>threshold=0.5578519105911255   |
| node_29:<br>feature_name=cg24407065  | feature_id[388].value ><br>threshold=0.5364363789558411    |
| node_33:<br>feature_name=cg15275017  | feature_id[5069].value ><br>threshold=0.4538573920726776   |
| node_51:<br>feature_name=cg07281938  | feature_id[351].value ><br>threshold=0.7506992518901825    |
| node_73:<br>feature_name=cg17524821  | feature_id[5626].value ><br>threshold=0.4504699558019638   |
| node_75:<br>feature_name=cg02973735  | feature_id[1677].value ><br>threshold=0.29383400082588196  |
| node_77:<br>feature_name=cg23345038  | feature_id[7002].value ><br>threshold=0.6255057156085968   |
| node_79:<br>feature_name=cg17537493  | feature_id[5630].value ><br>threshold=0.5825372636318207   |
| node_85:<br>feature_name=cg12948116  | feature_id[4375].value <=<br>threshold=0.5658791363239288  |
| node_86:<br>feature_name=cg06038180  | feature_id[2529].value ><br>threshold=0.43877437710762024  |
| node_88:<br>feature_name=cg15720017  | feature_id[5175].value ><br>threshold=0.7009969055652618   |
| node_90:<br>feature_name=cg13070215  | feature_id[314].value ><br>threshold=0.14645694941282272   |
| node_340:<br>feature_name=cg06272543 | feature_id[2590].value <=<br>threshold=0.07370422407984734 |
| node_341:<br>feature_name=cg24268698 | feature_id[7238].value <=<br>threshold=0.9151104986667633  |
| node_342:<br>feature_name=cg12669088 | feature_id[398].value <=<br>threshold=0.5310345143079758   |
| Class: epithelioid sarcoma (ES)      |                                                            |
|                                      |                                                            |
| Rules_102                            | passed counts:1                                            |
| node_0:<br>feature_name=cg11915444   | feature_id[4116].value ><br>threshold=0.3402601182460785   |
| node_10:<br>feature_name=cg12109728  | feature_id[4182].value ><br>threshold=0.7068270146846771   |
| node_20:<br>feature_name=cg10844382  | feature_id[3856].value ><br>threshold=0.5988894104957581   |
| node_24:<br>feature_name=cg00631702  | feature_id[943].value <=<br>threshold=0.37470583617687225  |

|                                      |                                                           |
|--------------------------------------|-----------------------------------------------------------|
| node_25:<br>feature_name=cg07912144  | feature_id[3075].value ><br>threshold=0.5578519105911255  |
| node_29:<br>feature_name=cg24407065  | feature_id[388].value ><br>threshold=0.5364363789558411   |
| node_33:<br>feature_name=cg15275017  | feature_id[5069].value ><br>threshold=0.4538573920726776  |
| node_51:<br>feature_name=cg07281938  | feature_id[351].value ><br>threshold=0.7506992518901825   |
| node_73:<br>feature_name=cg17524821  | feature_id[5626].value ><br>threshold=0.4504699558019638  |
| node_75:<br>feature_name=cg02973735  | feature_id[1677].value ><br>threshold=0.29383400082588196 |
| node_77:<br>feature_name=cg23345038  | feature_id[7002].value ><br>threshold=0.6255057156085968  |
| node_79:<br>feature_name=cg17537493  | feature_id[5630].value ><br>threshold=0.5825372636318207  |
| node_85:<br>feature_name=cg12948116  | feature_id[4375].value <=<br>threshold=0.5658791363239288 |
| node_86:<br>feature_name=cg06038180  | feature_id[2529].value ><br>threshold=0.43877437710762024 |
| node_88:<br>feature_name=cg15720017  | feature_id[5175].value ><br>threshold=0.7009969055652618  |
| node_90:<br>feature_name=cg13070215  | feature_id[314].value <=<br>threshold=0.14645694941282272 |
| node_91:<br>feature_name=cg01014262  | feature_id[1082].value <=<br>threshold=0.5737917125225067 |
| node_92:<br>feature_name=cg16863382  | feature_id[5471].value ><br>threshold=0.7200668156147003  |
| node_102:<br>feature_name=cg06633739 | feature_id[2686].value ><br>threshold=0.47115950286388397 |
| node_126:<br>feature_name=cg22946562 | feature_id[744].value ><br>threshold=0.6194809079170227   |
| node_170:<br>feature_name=cg12120430 | feature_id[4185].value ><br>threshold=0.5775820016860962  |
| node_172:<br>feature_name=cg02137970 | feature_id[1411].value ><br>threshold=0.6705857813358307  |
| node_196:<br>feature_name=cg03393445 | feature_id[1807].value ><br>threshold=0.4260125905275345  |
| node_218:<br>feature_name=cg23525541 | feature_id[7049].value ><br>threshold=0.4485483318567276  |
| node_222:<br>feature_name=cg10543634 | feature_id[3775].value ><br>threshold=0.29505227506160736 |
| node_224:<br>feature_name=cg07344990 | feature_id[2926].value ><br>threshold=0.5750180780887604  |

|                                                       |                                                           |
|-------------------------------------------------------|-----------------------------------------------------------|
| node_226:<br>feature_name=cg10558233                  | feature_id[3780].value <=<br>threshold=0.7217690348625183 |
| node_227:<br>feature_name=cg08097359                  | feature_id[3116].value ><br>threshold=0.3598180413246155  |
| node_229:<br>feature_name=cg22737001                  | feature_id[6843].value ><br>threshold=0.46281898021698    |
| node_333:<br>feature_name=cg17775332                  | feature_id[5680].value ><br>threshold=0.38904982805252075 |
| Class: high-grade conventional osteosarcoma (OS (HG)) |                                                           |
|                                                       |                                                           |
| Rules_103                                             | passed counts:1                                           |
| node_0:<br>feature_name=cg11915444                    | feature_id[4116].value ><br>threshold=0.3402601182460785  |
| node_10:<br>feature_name=cg12109728                   | feature_id[4182].value ><br>threshold=0.7068270146846771  |
| node_20:<br>feature_name=cg10844382                   | feature_id[3856].value ><br>threshold=0.5988894104957581  |
| node_24:<br>feature_name=cg00631702                   | feature_id[943].value <=<br>threshold=0.37470583617687225 |
| node_25:<br>feature_name=cg07912144                   | feature_id[3075].value ><br>threshold=0.5578519105911255  |
| node_29:<br>feature_name=cg24407065                   | feature_id[388].value ><br>threshold=0.5364363789558411   |
| node_33:<br>feature_name=cg15275017                   | feature_id[5069].value ><br>threshold=0.4538573920726776  |
| node_51:<br>feature_name=cg07281938                   | feature_id[351].value ><br>threshold=0.7506992518901825   |
| node_73:<br>feature_name=cg17524821                   | feature_id[5626].value ><br>threshold=0.4504699558019638  |
| node_75:<br>feature_name=cg02973735                   | feature_id[1677].value ><br>threshold=0.29383400082588196 |
| node_77:<br>feature_name=cg23345038                   | feature_id[7002].value ><br>threshold=0.6255057156085968  |
| node_79:<br>feature_name=cg17537493                   | feature_id[5630].value ><br>threshold=0.5825372636318207  |
| node_85:<br>feature_name=cg12948116                   | feature_id[4375].value <=<br>threshold=0.5658791363239288 |
| node_86:<br>feature_name=cg06038180                   | feature_id[2529].value ><br>threshold=0.43877437710762024 |
| node_88:<br>feature_name=cg15720017                   | feature_id[5175].value ><br>threshold=0.7009969055652618  |
| node_90:<br>feature_name=cg13070215                   | feature_id[314].value <=<br>threshold=0.14645694941282272 |

|                                      |                                                           |
|--------------------------------------|-----------------------------------------------------------|
| node_91:<br>feature_name=cg01014262  | feature_id[1082].value <=<br>threshold=0.5737917125225067 |
| node_92:<br>feature_name=cg16863382  | feature_id[5471].value ><br>threshold=0.7200668156147003  |
| node_102:<br>feature_name=cg06633739 | feature_id[2686].value ><br>threshold=0.47115950286388397 |
| node_126:<br>feature_name=cg22946562 | feature_id[744].value ><br>threshold=0.6194809079170227   |
| node_170:<br>feature_name=cg12120430 | feature_id[4185].value ><br>threshold=0.5775820016860962  |
| node_172:<br>feature_name=cg02137970 | feature_id[1411].value ><br>threshold=0.6705857813358307  |
| node_196:<br>feature_name=cg03393445 | feature_id[1807].value ><br>threshold=0.4260125905275345  |
| node_218:<br>feature_name=cg23525541 | feature_id[7049].value ><br>threshold=0.4485483318567276  |
| node_222:<br>feature_name=cg10543634 | feature_id[3775].value ><br>threshold=0.29505227506160736 |
| node_224:<br>feature_name=cg07344990 | feature_id[2926].value ><br>threshold=0.5750180780887604  |
| node_226:<br>feature_name=cg10558233 | feature_id[3780].value <=<br>threshold=0.7217690348625183 |
| node_227:<br>feature_name=cg08097359 | feature_id[3116].value ><br>threshold=0.3598180413246155  |
| node_229:<br>feature_name=cg22737001 | feature_id[6843].value <=<br>threshold=0.46281898021698   |
| node_230:<br>feature_name=cg24276624 | feature_id[7242].value ><br>threshold=0.6169979274272919  |
| node_232:<br>feature_name=cg04026354 | feature_id[1982].value ><br>threshold=0.42332448065280914 |
| node_316:<br>feature_name=cg23693485 | feature_id[7083].value ><br>threshold=0.7056963741779327  |
| node_320:<br>feature_name=cg16027775 | feature_id[5238].value ><br>threshold=0.17370137572288513 |
| node_322:<br>feature_name=cg16820411 | feature_id[5464].value ><br>threshold=0.9055586755275726  |
| node_324:<br>feature_name=cg07990658 | feature_id[3094].value ><br>threshold=0.9101644456386566  |
| node_326:<br>feature_name=cg12389888 | feature_id[4236].value ><br>threshold=0.6996647417545319  |
| node_328:<br>feature_name=cg06397381 | feature_id[2618].value ><br>threshold=0.6873181164264679  |
| node_330:<br>feature_name=cg21352006 | feature_id[6547].value ><br>threshold=0.09681446850299835 |

| Class: well differentiated liposarcoma (WDLS)/dedifferentiated liposarcoma (DDLs) |                                                           |
|-----------------------------------------------------------------------------------|-----------------------------------------------------------|
|                                                                                   |                                                           |
| Rules_104                                                                         | passed counts:1                                           |
| node_0:<br>feature_name=cg11915444                                                | feature_id[4116].value ><br>threshold=0.3402601182460785  |
| node_10:<br>feature_name=cg12109728                                               | feature_id[4182].value ><br>threshold=0.7068270146846771  |
| node_20:<br>feature_name=cg10844382                                               | feature_id[3856].value ><br>threshold=0.5988894104957581  |
| node_24:<br>feature_name=cg00631702                                               | feature_id[943].value <=<br>threshold=0.37470583617687225 |
| node_25:<br>feature_name=cg07912144                                               | feature_id[3075].value ><br>threshold=0.5578519105911255  |
| node_29:<br>feature_name=cg24407065                                               | feature_id[388].value ><br>threshold=0.5364363789558411   |
| node_33:<br>feature_name=cg15275017                                               | feature_id[5069].value ><br>threshold=0.4538573920726776  |
| node_51:<br>feature_name=cg07281938                                               | feature_id[351].value ><br>threshold=0.7506992518901825   |
| node_73:<br>feature_name=cg17524821                                               | feature_id[5626].value ><br>threshold=0.4504699558019638  |
| node_75:<br>feature_name=cg02973735                                               | feature_id[1677].value ><br>threshold=0.29383400082588196 |
| node_77:<br>feature_name=cg23345038                                               | feature_id[7002].value ><br>threshold=0.6255057156085968  |
| node_79:<br>feature_name=cg17537493                                               | feature_id[5630].value ><br>threshold=0.5825372636318207  |
| node_85:<br>feature_name=cg12948116                                               | feature_id[4375].value <=<br>threshold=0.5658791363239288 |
| node_86:<br>feature_name=cg06038180                                               | feature_id[2529].value ><br>threshold=0.43877437710762024 |
| node_88:<br>feature_name=cg15720017                                               | feature_id[5175].value ><br>threshold=0.7009969055652618  |
| node_90:<br>feature_name=cg13070215                                               | feature_id[314].value <=<br>threshold=0.14645694941282272 |
| node_91:<br>feature_name=cg01014262                                               | feature_id[1082].value <=<br>threshold=0.5737917125225067 |
| node_92:<br>feature_name=cg16863382                                               | feature_id[5471].value ><br>threshold=0.7200668156147003  |
| node_102:<br>feature_name=cg06633739                                              | feature_id[2686].value ><br>threshold=0.47115950286388397 |
| node_126:<br>feature_name=cg22946562                                              | feature_id[744].value ><br>threshold=0.6194809079170227   |

|                                        |                                                            |
|----------------------------------------|------------------------------------------------------------|
| node_170:<br>feature_name=cg12120430   | feature_id[4185].value ><br>threshold=0.5775820016860962   |
| node_172:<br>feature_name=cg02137970   | feature_id[1411].value ><br>threshold=0.6705857813358307   |
| node_196:<br>feature_name=cg03393445   | feature_id[1807].value ><br>threshold=0.4260125905275345   |
| node_218:<br>feature_name=cg23525541   | feature_id[7049].value ><br>threshold=0.4485483318567276   |
| node_222:<br>feature_name=cg10543634   | feature_id[3775].value ><br>threshold=0.29505227506160736  |
| node_224:<br>feature_name=cg07344990   | feature_id[2926].value ><br>threshold=0.5750180780887604   |
| node_226:<br>feature_name=cg10558233   | feature_id[3780].value <=<br>threshold=0.7217690348625183  |
| node_227:<br>feature_name=cg08097359   | feature_id[3116].value ><br>threshold=0.3598180413246155   |
| node_229:<br>feature_name=cg22737001   | feature_id[6843].value <=<br>threshold=0.46281898021698    |
| node_230:<br>feature_name=cg24276624   | feature_id[7242].value ><br>threshold=0.6169979274272919   |
| node_232:<br>feature_name=cg04026354   | feature_id[1982].value ><br>threshold=0.42332448065280914  |
| node_316:<br>feature_name=cg23693485   | feature_id[7083].value ><br>threshold=0.7056963741779327   |
| node_320:<br>feature_name=cg16027775   | feature_id[5238].value ><br>threshold=0.17370137572288513  |
| node_322:<br>feature_name=cg16820411   | feature_id[5464].value ><br>threshold=0.9055586755275726   |
| node_324:<br>feature_name=cg07990658   | feature_id[3094].value ><br>threshold=0.9101644456386566   |
| node_326:<br>feature_name=cg12389888   | feature_id[4236].value ><br>threshold=0.6996647417545319   |
| node_328:<br>feature_name=cg06397381   | feature_id[2618].value ><br>threshold=0.6873181164264679   |
| node_330:<br>feature_name=cg21352006   | feature_id[6547].value <=<br>threshold=0.09681446850299835 |
| Class: malignant rhabdoid tumour (MRT) |                                                            |
|                                        |                                                            |
| Rules_105                              | passed counts:1                                            |
| node_0:<br>feature_name=cg11915444     | feature_id[4116].value ><br>threshold=0.3402601182460785   |
| node_10:<br>feature_name=cg12109728    | feature_id[4182].value ><br>threshold=0.7068270146846771   |



|                                      |                                                           |
|--------------------------------------|-----------------------------------------------------------|
| node_20:<br>feature_name=cg10844382  | feature_id[3856].value ><br>threshold=0.5988894104957581  |
| node_24:<br>feature_name=cg00631702  | feature_id[943].value <=<br>threshold=0.37470583617687225 |
| node_25:<br>feature_name=cg07912144  | feature_id[3075].value ><br>threshold=0.5578519105911255  |
| node_29:<br>feature_name=cg24407065  | feature_id[388].value ><br>threshold=0.5364363789558411   |
| node_33:<br>feature_name=cg15275017  | feature_id[5069].value ><br>threshold=0.4538573920726776  |
| node_51:<br>feature_name=cg07281938  | feature_id[351].value ><br>threshold=0.7506992518901825   |
| node_73:<br>feature_name=cg17524821  | feature_id[5626].value ><br>threshold=0.4504699558019638  |
| node_75:<br>feature_name=cg02973735  | feature_id[1677].value ><br>threshold=0.29383400082588196 |
| node_77:<br>feature_name=cg23345038  | feature_id[7002].value ><br>threshold=0.6255057156085968  |
| node_79:<br>feature_name=cg17537493  | feature_id[5630].value ><br>threshold=0.5825372636318207  |
| node_85:<br>feature_name=cg12948116  | feature_id[4375].value <=<br>threshold=0.5658791363239288 |
| node_86:<br>feature_name=cg06038180  | feature_id[2529].value ><br>threshold=0.43877437710762024 |
| node_88:<br>feature_name=cg15720017  | feature_id[5175].value ><br>threshold=0.7009969055652618  |
| node_90:<br>feature_name=cg13070215  | feature_id[314].value <=<br>threshold=0.14645694941282272 |
| node_91:<br>feature_name=cg01014262  | feature_id[1082].value <=<br>threshold=0.5737917125225067 |
| node_92:<br>feature_name=cg16863382  | feature_id[5471].value ><br>threshold=0.7200668156147003  |
| node_102:<br>feature_name=cg06633739 | feature_id[2686].value ><br>threshold=0.47115950286388397 |
| node_126:<br>feature_name=cg22946562 | feature_id[744].value ><br>threshold=0.6194809079170227   |
| node_170:<br>feature_name=cg12120430 | feature_id[4185].value ><br>threshold=0.5775820016860962  |
| node_172:<br>feature_name=cg02137970 | feature_id[1411].value ><br>threshold=0.6705857813358307  |
| node_196:<br>feature_name=cg03393445 | feature_id[1807].value ><br>threshold=0.4260125905275345  |
| node_218:<br>feature_name=cg23525541 | feature_id[7049].value ><br>threshold=0.4485483318567276  |

|                                          |                                                           |
|------------------------------------------|-----------------------------------------------------------|
| node_222:<br>feature_name=cg10543634     | feature_id[3775].value ><br>threshold=0.29505227506160736 |
| node_224:<br>feature_name=cg07344990     | feature_id[2926].value ><br>threshold=0.5750180780887604  |
| node_226:<br>feature_name=cg10558233     | feature_id[3780].value <=<br>threshold=0.7217690348625183 |
| node_227:<br>feature_name=cg08097359     | feature_id[3116].value ><br>threshold=0.3598180413246155  |
| node_229:<br>feature_name=cg22737001     | feature_id[6843].value <=<br>threshold=0.46281898021698   |
| node_230:<br>feature_name=cg24276624     | feature_id[7242].value ><br>threshold=0.6169979274272919  |
| node_232:<br>feature_name=cg04026354     | feature_id[1982].value ><br>threshold=0.42332448065280914 |
| node_316:<br>feature_name=cg23693485     | feature_id[7083].value ><br>threshold=0.7056963741779327  |
| node_320:<br>feature_name=cg16027775     | feature_id[5238].value ><br>threshold=0.17370137572288513 |
| node_322:<br>feature_name=cg16820411     | feature_id[5464].value ><br>threshold=0.9055586755275726  |
| node_324:<br>feature_name=cg07990658     | feature_id[3094].value ><br>threshold=0.9101644456386566  |
| node_326:<br>feature_name=cg12389888     | feature_id[4236].value ><br>threshold=0.6996647417545319  |
| node_328:<br>feature_name=cg06397381     | feature_id[2618].value <=<br>threshold=0.6873181164264679 |
| Class: alveolar soft part sarcoma (ASPS) |                                                           |
|                                          |                                                           |
| Rules_106                                | passed counts:1                                           |
| node_0:<br>feature_name=cg11915444       | feature_id[4116].value ><br>threshold=0.3402601182460785  |
| node_10:<br>feature_name=cg12109728      | feature_id[4182].value ><br>threshold=0.7068270146846771  |
| node_20:<br>feature_name=cg10844382      | feature_id[3856].value ><br>threshold=0.5988894104957581  |
| node_24:<br>feature_name=cg00631702      | feature_id[943].value <=<br>threshold=0.37470583617687225 |
| node_25:<br>feature_name=cg07912144      | feature_id[3075].value ><br>threshold=0.5578519105911255  |
| node_29:<br>feature_name=cg24407065      | feature_id[388].value ><br>threshold=0.5364363789558411   |
| node_33:<br>feature_name=cg15275017      | feature_id[5069].value ><br>threshold=0.4538573920726776  |

|                                      |                                                           |
|--------------------------------------|-----------------------------------------------------------|
| node_51:<br>feature_name=cg07281938  | feature_id[351].value ><br>threshold=0.7506992518901825   |
| node_73:<br>feature_name=cg17524821  | feature_id[5626].value ><br>threshold=0.4504699558019638  |
| node_75:<br>feature_name=cg02973735  | feature_id[1677].value ><br>threshold=0.29383400082588196 |
| node_77:<br>feature_name=cg23345038  | feature_id[7002].value ><br>threshold=0.6255057156085968  |
| node_79:<br>feature_name=cg17537493  | feature_id[5630].value ><br>threshold=0.5825372636318207  |
| node_85:<br>feature_name=cg12948116  | feature_id[4375].value <=<br>threshold=0.5658791363239288 |
| node_86:<br>feature_name=cg06038180  | feature_id[2529].value ><br>threshold=0.43877437710762024 |
| node_88:<br>feature_name=cg15720017  | feature_id[5175].value ><br>threshold=0.7009969055652618  |
| node_90:<br>feature_name=cg13070215  | feature_id[314].value <=<br>threshold=0.14645694941282272 |
| node_91:<br>feature_name=cg01014262  | feature_id[1082].value <=<br>threshold=0.5737917125225067 |
| node_92:<br>feature_name=cg16863382  | feature_id[5471].value ><br>threshold=0.7200668156147003  |
| node_102:<br>feature_name=cg06633739 | feature_id[2686].value ><br>threshold=0.47115950286388397 |
| node_126:<br>feature_name=cg22946562 | feature_id[744].value ><br>threshold=0.6194809079170227   |
| node_170:<br>feature_name=cg12120430 | feature_id[4185].value ><br>threshold=0.5775820016860962  |
| node_172:<br>feature_name=cg02137970 | feature_id[1411].value ><br>threshold=0.6705857813358307  |
| node_196:<br>feature_name=cg03393445 | feature_id[1807].value ><br>threshold=0.4260125905275345  |
| node_218:<br>feature_name=cg23525541 | feature_id[7049].value ><br>threshold=0.4485483318567276  |
| node_222:<br>feature_name=cg10543634 | feature_id[3775].value ><br>threshold=0.29505227506160736 |
| node_224:<br>feature_name=cg07344990 | feature_id[2926].value ><br>threshold=0.5750180780887604  |
| node_226:<br>feature_name=cg10558233 | feature_id[3780].value <=<br>threshold=0.7217690348625183 |
| node_227:<br>feature_name=cg08097359 | feature_id[3116].value ><br>threshold=0.3598180413246155  |
| node_229:<br>feature_name=cg22737001 | feature_id[6843].value <=<br>threshold=0.46281898021698   |

|                                      |                                                           |
|--------------------------------------|-----------------------------------------------------------|
| node_230:<br>feature_name=cg24276624 | feature_id[7242].value ><br>threshold=0.6169979274272919  |
| node_232:<br>feature_name=cg04026354 | feature_id[1982].value ><br>threshold=0.42332448065280914 |
| node_316:<br>feature_name=cg23693485 | feature_id[7083].value ><br>threshold=0.7056963741779327  |
| node_320:<br>feature_name=cg16027775 | feature_id[5238].value ><br>threshold=0.17370137572288513 |
| node_322:<br>feature_name=cg16820411 | feature_id[5464].value ><br>threshold=0.9055586755275726  |
| node_324:<br>feature_name=cg07990658 | feature_id[3094].value ><br>threshold=0.9101644456386566  |
| node_326:<br>feature_name=cg12389888 | feature_id[4236].value <=<br>threshold=0.6996647417545319 |
| Class: angiosarcoma (AS)             |                                                           |
|                                      |                                                           |
| Rules_107                            | passed counts:1                                           |
| node_0:<br>feature_name=cg11915444   | feature_id[4116].value ><br>threshold=0.3402601182460785  |
| node_10:<br>feature_name=cg12109728  | feature_id[4182].value ><br>threshold=0.7068270146846771  |
| node_20:<br>feature_name=cg10844382  | feature_id[3856].value ><br>threshold=0.5988894104957581  |
| node_24:<br>feature_name=cg00631702  | feature_id[943].value <=<br>threshold=0.37470583617687225 |
| node_25:<br>feature_name=cg07912144  | feature_id[3075].value ><br>threshold=0.5578519105911255  |
| node_29:<br>feature_name=cg24407065  | feature_id[388].value ><br>threshold=0.5364363789558411   |
| node_33:<br>feature_name=cg15275017  | feature_id[5069].value ><br>threshold=0.4538573920726776  |
| node_51:<br>feature_name=cg07281938  | feature_id[351].value ><br>threshold=0.7506992518901825   |
| node_73:<br>feature_name=cg17524821  | feature_id[5626].value ><br>threshold=0.4504699558019638  |
| node_75:<br>feature_name=cg02973735  | feature_id[1677].value ><br>threshold=0.29383400082588196 |
| node_77:<br>feature_name=cg23345038  | feature_id[7002].value ><br>threshold=0.6255057156085968  |
| node_79:<br>feature_name=cg17537493  | feature_id[5630].value ><br>threshold=0.5825372636318207  |
| node_85:<br>feature_name=cg12948116  | feature_id[4375].value <=<br>threshold=0.5658791363239288 |

|                                      |                                                           |
|--------------------------------------|-----------------------------------------------------------|
| node_86:<br>feature_name=cg06038180  | feature_id[2529].value ><br>threshold=0.43877437710762024 |
| node_88:<br>feature_name=cg15720017  | feature_id[5175].value ><br>threshold=0.7009969055652618  |
| node_90:<br>feature_name=cg13070215  | feature_id[314].value <=<br>threshold=0.14645694941282272 |
| node_91:<br>feature_name=cg01014262  | feature_id[1082].value <=<br>threshold=0.5737917125225067 |
| node_92:<br>feature_name=cg16863382  | feature_id[5471].value ><br>threshold=0.7200668156147003  |
| node_102:<br>feature_name=cg06633739 | feature_id[2686].value ><br>threshold=0.47115950286388397 |
| node_126:<br>feature_name=cg22946562 | feature_id[744].value ><br>threshold=0.6194809079170227   |
| node_170:<br>feature_name=cg12120430 | feature_id[4185].value ><br>threshold=0.5775820016860962  |
| node_172:<br>feature_name=cg02137970 | feature_id[1411].value ><br>threshold=0.6705857813358307  |
| node_196:<br>feature_name=cg03393445 | feature_id[1807].value ><br>threshold=0.4260125905275345  |
| node_218:<br>feature_name=cg23525541 | feature_id[7049].value ><br>threshold=0.4485483318567276  |
| node_222:<br>feature_name=cg10543634 | feature_id[3775].value ><br>threshold=0.29505227506160736 |
| node_224:<br>feature_name=cg07344990 | feature_id[2926].value ><br>threshold=0.5750180780887604  |
| node_226:<br>feature_name=cg10558233 | feature_id[3780].value <=<br>threshold=0.7217690348625183 |
| node_227:<br>feature_name=cg08097359 | feature_id[3116].value ><br>threshold=0.3598180413246155  |
| node_229:<br>feature_name=cg22737001 | feature_id[6843].value <=<br>threshold=0.46281898021698   |
| node_230:<br>feature_name=cg24276624 | feature_id[7242].value ><br>threshold=0.6169979274272919  |
| node_232:<br>feature_name=cg04026354 | feature_id[1982].value ><br>threshold=0.42332448065280914 |
| node_316:<br>feature_name=cg23693485 | feature_id[7083].value <=<br>threshold=0.7056963741779327 |
| node_317:<br>feature_name=cg14583686 | feature_id[4895].value <=<br>threshold=0.70423823595047   |
| Class: sarcoma (SARC)                |                                                           |
|                                      |                                                           |
| Rules_108                            | passed counts:1                                           |

|                                      |                                                           |
|--------------------------------------|-----------------------------------------------------------|
| node_0:<br>feature_name=cg11915444   | feature_id[4116].value ><br>threshold=0.3402601182460785  |
| node_10:<br>feature_name=cg12109728  | feature_id[4182].value ><br>threshold=0.7068270146846771  |
| node_20:<br>feature_name=cg10844382  | feature_id[3856].value ><br>threshold=0.5988894104957581  |
| node_24:<br>feature_name=cg00631702  | feature_id[943].value <=<br>threshold=0.37470583617687225 |
| node_25:<br>feature_name=cg07912144  | feature_id[3075].value ><br>threshold=0.5578519105911255  |
| node_29:<br>feature_name=cg24407065  | feature_id[388].value ><br>threshold=0.5364363789558411   |
| node_33:<br>feature_name=cg15275017  | feature_id[5069].value ><br>threshold=0.4538573920726776  |
| node_51:<br>feature_name=cg07281938  | feature_id[351].value ><br>threshold=0.7506992518901825   |
| node_73:<br>feature_name=cg17524821  | feature_id[5626].value ><br>threshold=0.4504699558019638  |
| node_75:<br>feature_name=cg02973735  | feature_id[1677].value ><br>threshold=0.29383400082588196 |
| node_77:<br>feature_name=cg23345038  | feature_id[7002].value ><br>threshold=0.6255057156085968  |
| node_79:<br>feature_name=cg17537493  | feature_id[5630].value ><br>threshold=0.5825372636318207  |
| node_85:<br>feature_name=cg12948116  | feature_id[4375].value <=<br>threshold=0.5658791363239288 |
| node_86:<br>feature_name=cg06038180  | feature_id[2529].value ><br>threshold=0.43877437710762024 |
| node_88:<br>feature_name=cg15720017  | feature_id[5175].value ><br>threshold=0.7009969055652618  |
| node_90:<br>feature_name=cg13070215  | feature_id[314].value <=<br>threshold=0.14645694941282272 |
| node_91:<br>feature_name=cg01014262  | feature_id[1082].value <=<br>threshold=0.5737917125225067 |
| node_92:<br>feature_name=cg16863382  | feature_id[5471].value ><br>threshold=0.7200668156147003  |
| node_102:<br>feature_name=cg06633739 | feature_id[2686].value ><br>threshold=0.47115950286388397 |
| node_126:<br>feature_name=cg22946562 | feature_id[744].value ><br>threshold=0.6194809079170227   |
| node_170:<br>feature_name=cg12120430 | feature_id[4185].value ><br>threshold=0.5775820016860962  |
| node_172:<br>feature_name=cg02137970 | feature_id[1411].value ><br>threshold=0.6705857813358307  |

|                                      |                                                            |
|--------------------------------------|------------------------------------------------------------|
| node_196:<br>feature_name=cg03393445 | feature_id[1807].value ><br>threshold=0.4260125905275345   |
| node_218:<br>feature_name=cg23525541 | feature_id[7049].value ><br>threshold=0.4485483318567276   |
| node_222:<br>feature_name=cg10543634 | feature_id[3775].value ><br>threshold=0.29505227506160736  |
| node_224:<br>feature_name=cg07344990 | feature_id[2926].value ><br>threshold=0.5750180780887604   |
| node_226:<br>feature_name=cg10558233 | feature_id[3780].value <=<br>threshold=0.7217690348625183  |
| node_227:<br>feature_name=cg08097359 | feature_id[3116].value ><br>threshold=0.3598180413246155   |
| node_229:<br>feature_name=cg22737001 | feature_id[6843].value <=<br>threshold=0.46281898021698    |
| node_230:<br>feature_name=cg24276624 | feature_id[7242].value ><br>threshold=0.6169979274272919   |
| node_232:<br>feature_name=cg04026354 | feature_id[1982].value <=<br>threshold=0.42332448065280914 |
| node_233:<br>feature_name=cg06038180 | feature_id[2529].value ><br>threshold=0.6430551409721375   |
| node_235:<br>feature_name=cg14104252 | feature_id[4735].value ><br>threshold=0.5213949382305145   |
| node_239:<br>feature_name=cg06711298 | feature_id[2707].value ><br>threshold=0.36770085990428925  |
| node_241:<br>feature_name=cg11703722 | feature_id[4056].value ><br>threshold=0.5125315636396408   |
| node_243:<br>feature_name=cg21230793 | feature_id[6514].value ><br>threshold=0.27807849645614624  |
| node_245:<br>feature_name=cg06225767 | feature_id[2575].value ><br>threshold=0.18034886568784714  |
| node_247:<br>feature_name=cg00941576 | feature_id[1053].value ><br>threshold=0.2476368322968483   |
| node_249:<br>feature_name=cg10149889 | feature_id[3676].value ><br>threshold=0.633601188659668    |
| node_257:<br>feature_name=cg07608094 | feature_id[2999].value ><br>threshold=0.7820693254470825   |
| node_259:<br>feature_name=cg03315432 | feature_id[1783].value ><br>threshold=0.6790387332439423   |
| node_261:<br>feature_name=cg07894983 | feature_id[3070].value ><br>threshold=0.3577418476343155   |
| node_263:<br>feature_name=cg15646741 | feature_id[5160].value ><br>threshold=0.2826688587665558   |
| node_273:<br>feature_name=cg09701233 | feature_id[3546].value ><br>threshold=0.5189756155014038   |

|                                               |                                                            |
|-----------------------------------------------|------------------------------------------------------------|
| node_275:<br>feature_name=cg09230938          | feature_id[738].value ><br>threshold=0.3108274042606354    |
| node_277:<br>feature_name=cg05334190          | feature_id[2341].value ><br>threshold=0.2764553725719452   |
| node_279:<br>feature_name=cg15617847          | feature_id[5148].value <=<br>threshold=0.05914711393415928 |
| node_280:<br>feature_name=cg00216961          | feature_id[816].value <=<br>threshold=0.42650654911994934  |
| node_281:<br>feature_name=cg23946462          | feature_id[7146].value <=<br>threshold=0.9469821751117706  |
| node_282:<br>feature_name=cg06143290          | feature_id[2554].value <=<br>threshold=0.9263531863689423  |
| node_283:<br>feature_name=cg21528710          | feature_id[6588].value <=<br>threshold=0.8718287348747253  |
| node_284:<br>feature_name=cg14178043          | feature_id[4760].value <=<br>threshold=0.6852438449859619  |
| node_285:<br>feature_name=cg23906687          | feature_id[7133].value ><br>threshold=0.5761600136756897   |
| node_287:<br>feature_name=cg13838713          | feature_id[4641].value ><br>threshold=0.6983235478401184   |
| node_289:<br>feature_name=cg10239163          | feature_id[3694].value ><br>threshold=0.49343886971473694  |
| node_291:<br>feature_name=cg01197763          | feature_id[1134].value ><br>threshold=0.5575756281614304   |
| node_293:<br>feature_name=cg13210470          | feature_id[4437].value ><br>threshold=0.08023958280682564  |
| node_295:<br>feature_name=cg03731348          | feature_id[1909].value ><br>threshold=0.8963189721107483   |
| node_297:<br>feature_name=cg26929355          | feature_id[633].value ><br>threshold=0.7743391394615173    |
| node_299:<br>feature_name=cg02196592          | feature_id[1435].value ><br>threshold=0.4457027018070221   |
| node_301:<br>feature_name=cg07849237          | feature_id[3060].value ><br>threshold=0.8495026230812073   |
| node_303:<br>feature_name=cg03424213          | feature_id[1816].value ><br>threshold=0.6150504946708679   |
| node_305:<br>feature_name=cg06862949          | feature_id[2759].value ><br>threshold=0.7639872133731842   |
| node_307:<br>feature_name=cg19865472          | feature_id[6195].value ><br>threshold=0.9426173269748688   |
| Class: gastrointestinal stromal tumour (GIST) |                                                            |
|                                               |                                                            |
| Rules_109                                     | passed counts:1                                            |



|                                      |                                                           |
|--------------------------------------|-----------------------------------------------------------|
| node_0:<br>feature_name=cg11915444   | feature_id[4116].value ><br>threshold=0.3402601182460785  |
| node_10:<br>feature_name=cg12109728  | feature_id[4182].value ><br>threshold=0.7068270146846771  |
| node_20:<br>feature_name=cg10844382  | feature_id[3856].value ><br>threshold=0.5988894104957581  |
| node_24:<br>feature_name=cg00631702  | feature_id[943].value <=<br>threshold=0.37470583617687225 |
| node_25:<br>feature_name=cg07912144  | feature_id[3075].value ><br>threshold=0.5578519105911255  |
| node_29:<br>feature_name=cg24407065  | feature_id[388].value ><br>threshold=0.5364363789558411   |
| node_33:<br>feature_name=cg15275017  | feature_id[5069].value ><br>threshold=0.4538573920726776  |
| node_51:<br>feature_name=cg07281938  | feature_id[351].value ><br>threshold=0.7506992518901825   |
| node_73:<br>feature_name=cg17524821  | feature_id[5626].value ><br>threshold=0.4504699558019638  |
| node_75:<br>feature_name=cg02973735  | feature_id[1677].value ><br>threshold=0.29383400082588196 |
| node_77:<br>feature_name=cg23345038  | feature_id[7002].value ><br>threshold=0.6255057156085968  |
| node_79:<br>feature_name=cg17537493  | feature_id[5630].value ><br>threshold=0.5825372636318207  |
| node_85:<br>feature_name=cg12948116  | feature_id[4375].value <=<br>threshold=0.5658791363239288 |
| node_86:<br>feature_name=cg06038180  | feature_id[2529].value ><br>threshold=0.43877437710762024 |
| node_88:<br>feature_name=cg15720017  | feature_id[5175].value ><br>threshold=0.7009969055652618  |
| node_90:<br>feature_name=cg13070215  | feature_id[314].value <=<br>threshold=0.14645694941282272 |
| node_91:<br>feature_name=cg01014262  | feature_id[1082].value <=<br>threshold=0.5737917125225067 |
| node_92:<br>feature_name=cg16863382  | feature_id[5471].value ><br>threshold=0.7200668156147003  |
| node_102:<br>feature_name=cg06633739 | feature_id[2686].value ><br>threshold=0.47115950286388397 |
| node_126:<br>feature_name=cg22946562 | feature_id[744].value ><br>threshold=0.6194809079170227   |
| node_170:<br>feature_name=cg12120430 | feature_id[4185].value ><br>threshold=0.5775820016860962  |
| node_172:<br>feature_name=cg02137970 | feature_id[1411].value ><br>threshold=0.6705857813358307  |

|                                      |                                                            |
|--------------------------------------|------------------------------------------------------------|
| node_196:<br>feature_name=cg03393445 | feature_id[1807].value ><br>threshold=0.4260125905275345   |
| node_218:<br>feature_name=cg23525541 | feature_id[7049].value ><br>threshold=0.4485483318567276   |
| node_222:<br>feature_name=cg10543634 | feature_id[3775].value ><br>threshold=0.29505227506160736  |
| node_224:<br>feature_name=cg07344990 | feature_id[2926].value ><br>threshold=0.5750180780887604   |
| node_226:<br>feature_name=cg10558233 | feature_id[3780].value <=<br>threshold=0.7217690348625183  |
| node_227:<br>feature_name=cg08097359 | feature_id[3116].value ><br>threshold=0.3598180413246155   |
| node_229:<br>feature_name=cg22737001 | feature_id[6843].value <=<br>threshold=0.46281898021698    |
| node_230:<br>feature_name=cg24276624 | feature_id[7242].value ><br>threshold=0.6169979274272919   |
| node_232:<br>feature_name=cg04026354 | feature_id[1982].value <=<br>threshold=0.42332448065280914 |
| node_233:<br>feature_name=cg06038180 | feature_id[2529].value ><br>threshold=0.6430551409721375   |
| node_235:<br>feature_name=cg14104252 | feature_id[4735].value ><br>threshold=0.5213949382305145   |
| node_239:<br>feature_name=cg06711298 | feature_id[2707].value ><br>threshold=0.36770085990428925  |
| node_241:<br>feature_name=cg11703722 | feature_id[4056].value ><br>threshold=0.5125315636396408   |
| node_243:<br>feature_name=cg21230793 | feature_id[6514].value ><br>threshold=0.27807849645614624  |
| node_245:<br>feature_name=cg06225767 | feature_id[2575].value ><br>threshold=0.18034886568784714  |
| node_247:<br>feature_name=cg00941576 | feature_id[1053].value ><br>threshold=0.2476368322968483   |
| node_249:<br>feature_name=cg10149889 | feature_id[3676].value ><br>threshold=0.633601188659668    |
| node_257:<br>feature_name=cg07608094 | feature_id[2999].value ><br>threshold=0.7820693254470825   |
| node_259:<br>feature_name=cg03315432 | feature_id[1783].value ><br>threshold=0.6790387332439423   |
| node_261:<br>feature_name=cg07894983 | feature_id[3070].value ><br>threshold=0.3577418476343155   |
| node_263:<br>feature_name=cg15646741 | feature_id[5160].value ><br>threshold=0.2826688587665558   |
| node_273:<br>feature_name=cg09701233 | feature_id[3546].value ><br>threshold=0.5189756155014038   |

|                                      |                                                            |
|--------------------------------------|------------------------------------------------------------|
| node_275:<br>feature_name=cg09230938 | feature_id[738].value ><br>threshold=0.3108274042606354    |
| node_277:<br>feature_name=cg05334190 | feature_id[2341].value ><br>threshold=0.2764553725719452   |
| node_279:<br>feature_name=cg15617847 | feature_id[5148].value <=<br>threshold=0.05914711393415928 |
| node_280:<br>feature_name=cg00216961 | feature_id[816].value <=<br>threshold=0.42650654911994934  |
| node_281:<br>feature_name=cg23946462 | feature_id[7146].value <=<br>threshold=0.9469821751117706  |
| node_282:<br>feature_name=cg06143290 | feature_id[2554].value <=<br>threshold=0.9263531863689423  |
| node_283:<br>feature_name=cg21528710 | feature_id[6588].value <=<br>threshold=0.8718287348747253  |
| node_284:<br>feature_name=cg14178043 | feature_id[4760].value <=<br>threshold=0.6852438449859619  |
| node_285:<br>feature_name=cg23906687 | feature_id[7133].value ><br>threshold=0.5761600136756897   |
| node_287:<br>feature_name=cg13838713 | feature_id[4641].value ><br>threshold=0.6983235478401184   |
| node_289:<br>feature_name=cg10239163 | feature_id[3694].value ><br>threshold=0.49343886971473694  |
| node_291:<br>feature_name=cg01197763 | feature_id[1134].value ><br>threshold=0.5575756281614304   |
| node_293:<br>feature_name=cg13210470 | feature_id[4437].value ><br>threshold=0.08023958280682564  |
| node_295:<br>feature_name=cg03731348 | feature_id[1909].value ><br>threshold=0.8963189721107483   |
| node_297:<br>feature_name=cg26929355 | feature_id[633].value ><br>threshold=0.7743391394615173    |
| node_299:<br>feature_name=cg02196592 | feature_id[1435].value ><br>threshold=0.4457027018070221   |
| node_301:<br>feature_name=cg07849237 | feature_id[3060].value ><br>threshold=0.8495026230812073   |
| node_303:<br>feature_name=cg03424213 | feature_id[1816].value ><br>threshold=0.6150504946708679   |
| node_305:<br>feature_name=cg06862949 | feature_id[2759].value ><br>threshold=0.7639872133731842   |
| node_307:<br>feature_name=cg19865472 | feature_id[6195].value <=<br>threshold=0.9426173269748688  |
| Class: Kaposi sarcoma (KS)           |                                                            |
|                                      |                                                            |
| Rules_110                            | passed counts:1                                            |

|                                      |                                                           |
|--------------------------------------|-----------------------------------------------------------|
| node_0:<br>feature_name=cg11915444   | feature_id[4116].value ><br>threshold=0.3402601182460785  |
| node_10:<br>feature_name=cg12109728  | feature_id[4182].value ><br>threshold=0.7068270146846771  |
| node_20:<br>feature_name=cg10844382  | feature_id[3856].value ><br>threshold=0.5988894104957581  |
| node_24:<br>feature_name=cg00631702  | feature_id[943].value <=<br>threshold=0.37470583617687225 |
| node_25:<br>feature_name=cg07912144  | feature_id[3075].value ><br>threshold=0.5578519105911255  |
| node_29:<br>feature_name=cg24407065  | feature_id[388].value ><br>threshold=0.5364363789558411   |
| node_33:<br>feature_name=cg15275017  | feature_id[5069].value ><br>threshold=0.4538573920726776  |
| node_51:<br>feature_name=cg07281938  | feature_id[351].value ><br>threshold=0.7506992518901825   |
| node_73:<br>feature_name=cg17524821  | feature_id[5626].value ><br>threshold=0.4504699558019638  |
| node_75:<br>feature_name=cg02973735  | feature_id[1677].value ><br>threshold=0.29383400082588196 |
| node_77:<br>feature_name=cg23345038  | feature_id[7002].value ><br>threshold=0.6255057156085968  |
| node_79:<br>feature_name=cg17537493  | feature_id[5630].value ><br>threshold=0.5825372636318207  |
| node_85:<br>feature_name=cg12948116  | feature_id[4375].value <=<br>threshold=0.5658791363239288 |
| node_86:<br>feature_name=cg06038180  | feature_id[2529].value ><br>threshold=0.43877437710762024 |
| node_88:<br>feature_name=cg15720017  | feature_id[5175].value ><br>threshold=0.7009969055652618  |
| node_90:<br>feature_name=cg13070215  | feature_id[314].value <=<br>threshold=0.14645694941282272 |
| node_91:<br>feature_name=cg01014262  | feature_id[1082].value <=<br>threshold=0.5737917125225067 |
| node_92:<br>feature_name=cg16863382  | feature_id[5471].value ><br>threshold=0.7200668156147003  |
| node_102:<br>feature_name=cg06633739 | feature_id[2686].value ><br>threshold=0.47115950286388397 |
| node_126:<br>feature_name=cg22946562 | feature_id[744].value ><br>threshold=0.6194809079170227   |
| node_170:<br>feature_name=cg12120430 | feature_id[4185].value ><br>threshold=0.5775820016860962  |
| node_172:<br>feature_name=cg02137970 | feature_id[1411].value ><br>threshold=0.6705857813358307  |

|                                      |                                                            |
|--------------------------------------|------------------------------------------------------------|
| node_196:<br>feature_name=cg03393445 | feature_id[1807].value ><br>threshold=0.4260125905275345   |
| node_218:<br>feature_name=cg23525541 | feature_id[7049].value ><br>threshold=0.4485483318567276   |
| node_222:<br>feature_name=cg10543634 | feature_id[3775].value ><br>threshold=0.29505227506160736  |
| node_224:<br>feature_name=cg07344990 | feature_id[2926].value ><br>threshold=0.5750180780887604   |
| node_226:<br>feature_name=cg10558233 | feature_id[3780].value <=<br>threshold=0.7217690348625183  |
| node_227:<br>feature_name=cg08097359 | feature_id[3116].value ><br>threshold=0.3598180413246155   |
| node_229:<br>feature_name=cg22737001 | feature_id[6843].value <=<br>threshold=0.46281898021698    |
| node_230:<br>feature_name=cg24276624 | feature_id[7242].value ><br>threshold=0.6169979274272919   |
| node_232:<br>feature_name=cg04026354 | feature_id[1982].value <=<br>threshold=0.42332448065280914 |
| node_233:<br>feature_name=cg06038180 | feature_id[2529].value ><br>threshold=0.6430551409721375   |
| node_235:<br>feature_name=cg14104252 | feature_id[4735].value ><br>threshold=0.5213949382305145   |
| node_239:<br>feature_name=cg06711298 | feature_id[2707].value ><br>threshold=0.36770085990428925  |
| node_241:<br>feature_name=cg11703722 | feature_id[4056].value ><br>threshold=0.5125315636396408   |
| node_243:<br>feature_name=cg21230793 | feature_id[6514].value ><br>threshold=0.27807849645614624  |
| node_245:<br>feature_name=cg06225767 | feature_id[2575].value ><br>threshold=0.18034886568784714  |
| node_247:<br>feature_name=cg00941576 | feature_id[1053].value ><br>threshold=0.2476368322968483   |
| node_249:<br>feature_name=cg10149889 | feature_id[3676].value ><br>threshold=0.633601188659668    |
| node_257:<br>feature_name=cg07608094 | feature_id[2999].value ><br>threshold=0.7820693254470825   |
| node_259:<br>feature_name=cg03315432 | feature_id[1783].value ><br>threshold=0.6790387332439423   |
| node_261:<br>feature_name=cg07894983 | feature_id[3070].value ><br>threshold=0.3577418476343155   |
| node_263:<br>feature_name=cg15646741 | feature_id[5160].value ><br>threshold=0.2826688587665558   |
| node_273:<br>feature_name=cg09701233 | feature_id[3546].value ><br>threshold=0.5189756155014038   |

|                                      |                                                            |
|--------------------------------------|------------------------------------------------------------|
| node_275:<br>feature_name=cg09230938 | feature_id[738].value ><br>threshold=0.3108274042606354    |
| node_277:<br>feature_name=cg05334190 | feature_id[2341].value ><br>threshold=0.2764553725719452   |
| node_279:<br>feature_name=cg15617847 | feature_id[5148].value <=<br>threshold=0.05914711393415928 |
| node_280:<br>feature_name=cg00216961 | feature_id[816].value <=<br>threshold=0.42650654911994934  |
| node_281:<br>feature_name=cg23946462 | feature_id[7146].value <=<br>threshold=0.9469821751117706  |
| node_282:<br>feature_name=cg06143290 | feature_id[2554].value <=<br>threshold=0.9263531863689423  |
| node_283:<br>feature_name=cg21528710 | feature_id[6588].value <=<br>threshold=0.8718287348747253  |
| node_284:<br>feature_name=cg14178043 | feature_id[4760].value <=<br>threshold=0.6852438449859619  |
| node_285:<br>feature_name=cg23906687 | feature_id[7133].value ><br>threshold=0.5761600136756897   |
| node_287:<br>feature_name=cg13838713 | feature_id[4641].value ><br>threshold=0.6983235478401184   |
| node_289:<br>feature_name=cg10239163 | feature_id[3694].value ><br>threshold=0.49343886971473694  |
| node_291:<br>feature_name=cg01197763 | feature_id[1134].value ><br>threshold=0.5575756281614304   |
| node_293:<br>feature_name=cg13210470 | feature_id[4437].value ><br>threshold=0.08023958280682564  |
| node_295:<br>feature_name=cg03731348 | feature_id[1909].value ><br>threshold=0.8963189721107483   |
| node_297:<br>feature_name=cg26929355 | feature_id[633].value ><br>threshold=0.7743391394615173    |
| node_299:<br>feature_name=cg02196592 | feature_id[1435].value ><br>threshold=0.4457027018070221   |
| node_301:<br>feature_name=cg07849237 | feature_id[3060].value ><br>threshold=0.8495026230812073   |
| node_303:<br>feature_name=cg03424213 | feature_id[1816].value ><br>threshold=0.6150504946708679   |
| node_305:<br>feature_name=cg06862949 | feature_id[2759].value <=<br>threshold=0.7639872133731842  |
| Class: Ewing sarcoma (EWING)         |                                                            |
|                                      |                                                            |
| Rules_111                            | passed counts:1                                            |
| node_0:<br>feature_name=cg11915444   | feature_id[4116].value ><br>threshold=0.3402601182460785   |

|                                      |                                                           |
|--------------------------------------|-----------------------------------------------------------|
| node_10:<br>feature_name=cg12109728  | feature_id[4182].value ><br>threshold=0.7068270146846771  |
| node_20:<br>feature_name=cg10844382  | feature_id[3856].value ><br>threshold=0.5988894104957581  |
| node_24:<br>feature_name=cg00631702  | feature_id[943].value <=<br>threshold=0.37470583617687225 |
| node_25:<br>feature_name=cg07912144  | feature_id[3075].value ><br>threshold=0.5578519105911255  |
| node_29:<br>feature_name=cg24407065  | feature_id[388].value ><br>threshold=0.5364363789558411   |
| node_33:<br>feature_name=cg15275017  | feature_id[5069].value ><br>threshold=0.4538573920726776  |
| node_51:<br>feature_name=cg07281938  | feature_id[351].value ><br>threshold=0.7506992518901825   |
| node_73:<br>feature_name=cg17524821  | feature_id[5626].value ><br>threshold=0.4504699558019638  |
| node_75:<br>feature_name=cg02973735  | feature_id[1677].value ><br>threshold=0.29383400082588196 |
| node_77:<br>feature_name=cg23345038  | feature_id[7002].value ><br>threshold=0.6255057156085968  |
| node_79:<br>feature_name=cg17537493  | feature_id[5630].value ><br>threshold=0.5825372636318207  |
| node_85:<br>feature_name=cg12948116  | feature_id[4375].value <=<br>threshold=0.5658791363239288 |
| node_86:<br>feature_name=cg06038180  | feature_id[2529].value ><br>threshold=0.43877437710762024 |
| node_88:<br>feature_name=cg15720017  | feature_id[5175].value ><br>threshold=0.7009969055652618  |
| node_90:<br>feature_name=cg13070215  | feature_id[314].value <=<br>threshold=0.14645694941282272 |
| node_91:<br>feature_name=cg01014262  | feature_id[1082].value <=<br>threshold=0.5737917125225067 |
| node_92:<br>feature_name=cg16863382  | feature_id[5471].value ><br>threshold=0.7200668156147003  |
| node_102:<br>feature_name=cg06633739 | feature_id[2686].value ><br>threshold=0.47115950286388397 |
| node_126:<br>feature_name=cg22946562 | feature_id[744].value ><br>threshold=0.6194809079170227   |
| node_170:<br>feature_name=cg12120430 | feature_id[4185].value ><br>threshold=0.5775820016860962  |
| node_172:<br>feature_name=cg02137970 | feature_id[1411].value ><br>threshold=0.6705857813358307  |
| node_196:<br>feature_name=cg03393445 | feature_id[1807].value ><br>threshold=0.4260125905275345  |

|                                      |                                                            |
|--------------------------------------|------------------------------------------------------------|
| node_218:<br>feature_name=cg23525541 | feature_id[7049].value ><br>threshold=0.4485483318567276   |
| node_222:<br>feature_name=cg10543634 | feature_id[3775].value ><br>threshold=0.29505227506160736  |
| node_224:<br>feature_name=cg07344990 | feature_id[2926].value ><br>threshold=0.5750180780887604   |
| node_226:<br>feature_name=cg10558233 | feature_id[3780].value <=<br>threshold=0.7217690348625183  |
| node_227:<br>feature_name=cg08097359 | feature_id[3116].value ><br>threshold=0.3598180413246155   |
| node_229:<br>feature_name=cg22737001 | feature_id[6843].value <=<br>threshold=0.46281898021698    |
| node_230:<br>feature_name=cg24276624 | feature_id[7242].value ><br>threshold=0.6169979274272919   |
| node_232:<br>feature_name=cg04026354 | feature_id[1982].value <=<br>threshold=0.42332448065280914 |
| node_233:<br>feature_name=cg06038180 | feature_id[2529].value ><br>threshold=0.6430551409721375   |
| node_235:<br>feature_name=cg14104252 | feature_id[4735].value ><br>threshold=0.5213949382305145   |
| node_239:<br>feature_name=cg06711298 | feature_id[2707].value ><br>threshold=0.36770085990428925  |
| node_241:<br>feature_name=cg11703722 | feature_id[4056].value ><br>threshold=0.5125315636396408   |
| node_243:<br>feature_name=cg21230793 | feature_id[6514].value ><br>threshold=0.27807849645614624  |
| node_245:<br>feature_name=cg06225767 | feature_id[2575].value ><br>threshold=0.18034886568784714  |
| node_247:<br>feature_name=cg00941576 | feature_id[1053].value ><br>threshold=0.2476368322968483   |
| node_249:<br>feature_name=cg10149889 | feature_id[3676].value ><br>threshold=0.633601188659668    |
| node_257:<br>feature_name=cg07608094 | feature_id[2999].value ><br>threshold=0.7820693254470825   |
| node_259:<br>feature_name=cg03315432 | feature_id[1783].value ><br>threshold=0.6790387332439423   |
| node_261:<br>feature_name=cg07894983 | feature_id[3070].value ><br>threshold=0.3577418476343155   |
| node_263:<br>feature_name=cg15646741 | feature_id[5160].value ><br>threshold=0.2826688587665558   |
| node_273:<br>feature_name=cg09701233 | feature_id[3546].value ><br>threshold=0.5189756155014038   |
| node_275:<br>feature_name=cg09230938 | feature_id[738].value ><br>threshold=0.3108274042606354    |



|                                                                                   |                                                            |
|-----------------------------------------------------------------------------------|------------------------------------------------------------|
| node_277:<br>feature_name=cg05334190                                              | feature_id[2341].value ><br>threshold=0.2764553725719452   |
| node_279:<br>feature_name=cg15617847                                              | feature_id[5148].value <=<br>threshold=0.05914711393415928 |
| node_280:<br>feature_name=cg00216961                                              | feature_id[816].value <=<br>threshold=0.42650654911994934  |
| node_281:<br>feature_name=cg23946462                                              | feature_id[7146].value <=<br>threshold=0.9469821751117706  |
| node_282:<br>feature_name=cg06143290                                              | feature_id[2554].value <=<br>threshold=0.9263531863689423  |
| node_283:<br>feature_name=cg21528710                                              | feature_id[6588].value <=<br>threshold=0.8718287348747253  |
| node_284:<br>feature_name=cg14178043                                              | feature_id[4760].value <=<br>threshold=0.6852438449859619  |
| node_285:<br>feature_name=cg23906687                                              | feature_id[7133].value ><br>threshold=0.5761600136756897   |
| node_287:<br>feature_name=cg13838713                                              | feature_id[4641].value ><br>threshold=0.6983235478401184   |
| node_289:<br>feature_name=cg10239163                                              | feature_id[3694].value ><br>threshold=0.49343886971473694  |
| node_291:<br>feature_name=cg01197763                                              | feature_id[1134].value ><br>threshold=0.5575756281614304   |
| node_293:<br>feature_name=cg13210470                                              | feature_id[4437].value ><br>threshold=0.08023958280682564  |
| node_295:<br>feature_name=cg03731348                                              | feature_id[1909].value ><br>threshold=0.8963189721107483   |
| node_297:<br>feature_name=cg26929355                                              | feature_id[633].value ><br>threshold=0.7743391394615173    |
| node_299:<br>feature_name=cg02196592                                              | feature_id[1435].value ><br>threshold=0.4457027018070221   |
| node_301:<br>feature_name=cg07849237                                              | feature_id[3060].value ><br>threshold=0.8495026230812073   |
| node_303:<br>feature_name=cg03424213                                              | feature_id[1816].value <=<br>threshold=0.6150504946708679  |
| Class: well differentiated liposarcoma (WDLs)/dedifferentiated liposarcoma (DDLs) |                                                            |
|                                                                                   |                                                            |
| Rules_112                                                                         | passed counts:1                                            |
| node_0:<br>feature_name=cg11915444                                                | feature_id[4116].value ><br>threshold=0.3402601182460785   |
| node_10:<br>feature_name=cg12109728                                               | feature_id[4182].value ><br>threshold=0.7068270146846771   |
| node_20:<br>feature_name=cg10844382                                               | feature_id[3856].value ><br>threshold=0.5988894104957581   |

|                                      |                                                           |
|--------------------------------------|-----------------------------------------------------------|
| node_24:<br>feature_name=cg00631702  | feature_id[943].value <=<br>threshold=0.37470583617687225 |
| node_25:<br>feature_name=cg07912144  | feature_id[3075].value ><br>threshold=0.5578519105911255  |
| node_29:<br>feature_name=cg24407065  | feature_id[388].value ><br>threshold=0.5364363789558411   |
| node_33:<br>feature_name=cg15275017  | feature_id[5069].value ><br>threshold=0.4538573920726776  |
| node_51:<br>feature_name=cg07281938  | feature_id[351].value ><br>threshold=0.7506992518901825   |
| node_73:<br>feature_name=cg17524821  | feature_id[5626].value ><br>threshold=0.4504699558019638  |
| node_75:<br>feature_name=cg02973735  | feature_id[1677].value ><br>threshold=0.29383400082588196 |
| node_77:<br>feature_name=cg23345038  | feature_id[7002].value ><br>threshold=0.6255057156085968  |
| node_79:<br>feature_name=cg17537493  | feature_id[5630].value ><br>threshold=0.5825372636318207  |
| node_85:<br>feature_name=cg12948116  | feature_id[4375].value <=<br>threshold=0.5658791363239288 |
| node_86:<br>feature_name=cg06038180  | feature_id[2529].value ><br>threshold=0.43877437710762024 |
| node_88:<br>feature_name=cg15720017  | feature_id[5175].value ><br>threshold=0.7009969055652618  |
| node_90:<br>feature_name=cg13070215  | feature_id[314].value <=<br>threshold=0.14645694941282272 |
| node_91:<br>feature_name=cg01014262  | feature_id[1082].value <=<br>threshold=0.5737917125225067 |
| node_92:<br>feature_name=cg16863382  | feature_id[5471].value ><br>threshold=0.7200668156147003  |
| node_102:<br>feature_name=cg06633739 | feature_id[2686].value ><br>threshold=0.47115950286388397 |
| node_126:<br>feature_name=cg22946562 | feature_id[744].value ><br>threshold=0.6194809079170227   |
| node_170:<br>feature_name=cg12120430 | feature_id[4185].value ><br>threshold=0.5775820016860962  |
| node_172:<br>feature_name=cg02137970 | feature_id[1411].value ><br>threshold=0.6705857813358307  |
| node_196:<br>feature_name=cg03393445 | feature_id[1807].value ><br>threshold=0.4260125905275345  |
| node_218:<br>feature_name=cg23525541 | feature_id[7049].value ><br>threshold=0.4485483318567276  |
| node_222:<br>feature_name=cg10543634 | feature_id[3775].value ><br>threshold=0.29505227506160736 |

|                                      |                                                            |
|--------------------------------------|------------------------------------------------------------|
| node_224:<br>feature_name=cg07344990 | feature_id[2926].value ><br>threshold=0.5750180780887604   |
| node_226:<br>feature_name=cg10558233 | feature_id[3780].value <=<br>threshold=0.7217690348625183  |
| node_227:<br>feature_name=cg08097359 | feature_id[3116].value ><br>threshold=0.3598180413246155   |
| node_229:<br>feature_name=cg22737001 | feature_id[6843].value <=<br>threshold=0.46281898021698    |
| node_230:<br>feature_name=cg24276624 | feature_id[7242].value ><br>threshold=0.6169979274272919   |
| node_232:<br>feature_name=cg04026354 | feature_id[1982].value <=<br>threshold=0.42332448065280914 |
| node_233:<br>feature_name=cg06038180 | feature_id[2529].value ><br>threshold=0.6430551409721375   |
| node_235:<br>feature_name=cg14104252 | feature_id[4735].value ><br>threshold=0.5213949382305145   |
| node_239:<br>feature_name=cg06711298 | feature_id[2707].value ><br>threshold=0.36770085990428925  |
| node_241:<br>feature_name=cg11703722 | feature_id[4056].value ><br>threshold=0.5125315636396408   |
| node_243:<br>feature_name=cg21230793 | feature_id[6514].value ><br>threshold=0.27807849645614624  |
| node_245:<br>feature_name=cg06225767 | feature_id[2575].value ><br>threshold=0.18034886568784714  |
| node_247:<br>feature_name=cg00941576 | feature_id[1053].value ><br>threshold=0.2476368322968483   |
| node_249:<br>feature_name=cg10149889 | feature_id[3676].value ><br>threshold=0.633601188659668    |
| node_257:<br>feature_name=cg07608094 | feature_id[2999].value ><br>threshold=0.7820693254470825   |
| node_259:<br>feature_name=cg03315432 | feature_id[1783].value ><br>threshold=0.6790387332439423   |
| node_261:<br>feature_name=cg07894983 | feature_id[3070].value ><br>threshold=0.3577418476343155   |
| node_263:<br>feature_name=cg15646741 | feature_id[5160].value ><br>threshold=0.2826688587665558   |
| node_273:<br>feature_name=cg09701233 | feature_id[3546].value ><br>threshold=0.5189756155014038   |
| node_275:<br>feature_name=cg09230938 | feature_id[738].value ><br>threshold=0.3108274042606354    |
| node_277:<br>feature_name=cg05334190 | feature_id[2341].value ><br>threshold=0.2764553725719452   |
| node_279:<br>feature_name=cg15617847 | feature_id[5148].value <=<br>threshold=0.05914711393415928 |

|                                      |                                                           |
|--------------------------------------|-----------------------------------------------------------|
| node_280:<br>feature_name=cg00216961 | feature_id[816].value <=<br>threshold=0.42650654911994934 |
| node_281:<br>feature_name=cg23946462 | feature_id[7146].value <=<br>threshold=0.9469821751117706 |
| node_282:<br>feature_name=cg06143290 | feature_id[2554].value <=<br>threshold=0.9263531863689423 |
| node_283:<br>feature_name=cg21528710 | feature_id[6588].value <=<br>threshold=0.8718287348747253 |
| node_284:<br>feature_name=cg14178043 | feature_id[4760].value <=<br>threshold=0.6852438449859619 |
| node_285:<br>feature_name=cg23906687 | feature_id[7133].value ><br>threshold=0.5761600136756897  |
| node_287:<br>feature_name=cg13838713 | feature_id[4641].value ><br>threshold=0.6983235478401184  |
| node_289:<br>feature_name=cg10239163 | feature_id[3694].value ><br>threshold=0.49343886971473694 |
| node_291:<br>feature_name=cg01197763 | feature_id[1134].value ><br>threshold=0.5575756281614304  |
| node_293:<br>feature_name=cg13210470 | feature_id[4437].value ><br>threshold=0.08023958280682564 |
| node_295:<br>feature_name=cg03731348 | feature_id[1909].value ><br>threshold=0.8963189721107483  |
| node_297:<br>feature_name=cg26929355 | feature_id[633].value ><br>threshold=0.7743391394615173   |
| node_299:<br>feature_name=cg02196592 | feature_id[1435].value ><br>threshold=0.4457027018070221  |
| node_301:<br>feature_name=cg07849237 | feature_id[3060].value <=<br>threshold=0.8495026230812073 |
| Class: myositis proliferans (MP)     |                                                           |
|                                      |                                                           |
| Rules_113                            | passed counts:1                                           |
| node_0:<br>feature_name=cg11915444   | feature_id[4116].value ><br>threshold=0.3402601182460785  |
| node_10:<br>feature_name=cg12109728  | feature_id[4182].value ><br>threshold=0.7068270146846771  |
| node_20:<br>feature_name=cg10844382  | feature_id[3856].value ><br>threshold=0.5988894104957581  |
| node_24:<br>feature_name=cg00631702  | feature_id[943].value <=<br>threshold=0.37470583617687225 |
| node_25:<br>feature_name=cg07912144  | feature_id[3075].value ><br>threshold=0.5578519105911255  |
| node_29:<br>feature_name=cg24407065  | feature_id[388].value ><br>threshold=0.5364363789558411   |

|                                      |                                                           |
|--------------------------------------|-----------------------------------------------------------|
| node_33:<br>feature_name=cg15275017  | feature_id[5069].value ><br>threshold=0.4538573920726776  |
| node_51:<br>feature_name=cg07281938  | feature_id[351].value ><br>threshold=0.7506992518901825   |
| node_73:<br>feature_name=cg17524821  | feature_id[5626].value ><br>threshold=0.4504699558019638  |
| node_75:<br>feature_name=cg02973735  | feature_id[1677].value ><br>threshold=0.29383400082588196 |
| node_77:<br>feature_name=cg23345038  | feature_id[7002].value ><br>threshold=0.6255057156085968  |
| node_79:<br>feature_name=cg17537493  | feature_id[5630].value ><br>threshold=0.5825372636318207  |
| node_85:<br>feature_name=cg12948116  | feature_id[4375].value <=<br>threshold=0.5658791363239288 |
| node_86:<br>feature_name=cg06038180  | feature_id[2529].value ><br>threshold=0.43877437710762024 |
| node_88:<br>feature_name=cg15720017  | feature_id[5175].value ><br>threshold=0.7009969055652618  |
| node_90:<br>feature_name=cg13070215  | feature_id[314].value <=<br>threshold=0.14645694941282272 |
| node_91:<br>feature_name=cg01014262  | feature_id[1082].value <=<br>threshold=0.5737917125225067 |
| node_92:<br>feature_name=cg16863382  | feature_id[5471].value ><br>threshold=0.7200668156147003  |
| node_102:<br>feature_name=cg06633739 | feature_id[2686].value ><br>threshold=0.47115950286388397 |
| node_126:<br>feature_name=cg22946562 | feature_id[744].value ><br>threshold=0.6194809079170227   |
| node_170:<br>feature_name=cg12120430 | feature_id[4185].value ><br>threshold=0.5775820016860962  |
| node_172:<br>feature_name=cg02137970 | feature_id[1411].value ><br>threshold=0.6705857813358307  |
| node_196:<br>feature_name=cg03393445 | feature_id[1807].value ><br>threshold=0.4260125905275345  |
| node_218:<br>feature_name=cg23525541 | feature_id[7049].value ><br>threshold=0.4485483318567276  |
| node_222:<br>feature_name=cg10543634 | feature_id[3775].value ><br>threshold=0.29505227506160736 |
| node_224:<br>feature_name=cg07344990 | feature_id[2926].value ><br>threshold=0.5750180780887604  |
| node_226:<br>feature_name=cg10558233 | feature_id[3780].value <=<br>threshold=0.7217690348625183 |
| node_227:<br>feature_name=cg08097359 | feature_id[3116].value ><br>threshold=0.3598180413246155  |

|                                      |                                                            |
|--------------------------------------|------------------------------------------------------------|
| node_229:<br>feature_name=cg22737001 | feature_id[6843].value <=<br>threshold=0.46281898021698    |
| node_230:<br>feature_name=cg24276624 | feature_id[7242].value ><br>threshold=0.6169979274272919   |
| node_232:<br>feature_name=cg04026354 | feature_id[1982].value <=<br>threshold=0.42332448065280914 |
| node_233:<br>feature_name=cg06038180 | feature_id[2529].value ><br>threshold=0.6430551409721375   |
| node_235:<br>feature_name=cg14104252 | feature_id[4735].value ><br>threshold=0.5213949382305145   |
| node_239:<br>feature_name=cg06711298 | feature_id[2707].value ><br>threshold=0.36770085990428925  |
| node_241:<br>feature_name=cg11703722 | feature_id[4056].value ><br>threshold=0.5125315636396408   |
| node_243:<br>feature_name=cg21230793 | feature_id[6514].value ><br>threshold=0.27807849645614624  |
| node_245:<br>feature_name=cg06225767 | feature_id[2575].value ><br>threshold=0.18034886568784714  |
| node_247:<br>feature_name=cg00941576 | feature_id[1053].value ><br>threshold=0.2476368322968483   |
| node_249:<br>feature_name=cg10149889 | feature_id[3676].value ><br>threshold=0.633601188659668    |
| node_257:<br>feature_name=cg07608094 | feature_id[2999].value ><br>threshold=0.7820693254470825   |
| node_259:<br>feature_name=cg03315432 | feature_id[1783].value ><br>threshold=0.6790387332439423   |
| node_261:<br>feature_name=cg07894983 | feature_id[3070].value ><br>threshold=0.3577418476343155   |
| node_263:<br>feature_name=cg15646741 | feature_id[5160].value ><br>threshold=0.2826688587665558   |
| node_273:<br>feature_name=cg09701233 | feature_id[3546].value ><br>threshold=0.5189756155014038   |
| node_275:<br>feature_name=cg09230938 | feature_id[738].value ><br>threshold=0.3108274042606354    |
| node_277:<br>feature_name=cg05334190 | feature_id[2341].value ><br>threshold=0.2764553725719452   |
| node_279:<br>feature_name=cg15617847 | feature_id[5148].value <=<br>threshold=0.05914711393415928 |
| node_280:<br>feature_name=cg00216961 | feature_id[816].value <=<br>threshold=0.42650654911994934  |
| node_281:<br>feature_name=cg23946462 | feature_id[7146].value <=<br>threshold=0.9469821751117706  |
| node_282:<br>feature_name=cg06143290 | feature_id[2554].value <=<br>threshold=0.9263531863689423  |

|                                                         |                                                           |
|---------------------------------------------------------|-----------------------------------------------------------|
| node_283:<br>feature_name=cg21528710                    | feature_id[6588].value <=<br>threshold=0.8718287348747253 |
| node_284:<br>feature_name=cg14178043                    | feature_id[4760].value <=<br>threshold=0.6852438449859619 |
| node_285:<br>feature_name=cg23906687                    | feature_id[7133].value ><br>threshold=0.5761600136756897  |
| node_287:<br>feature_name=cg13838713                    | feature_id[4641].value ><br>threshold=0.6983235478401184  |
| node_289:<br>feature_name=cg10239163                    | feature_id[3694].value ><br>threshold=0.49343886971473694 |
| node_291:<br>feature_name=cg01197763                    | feature_id[1134].value ><br>threshold=0.5575756281614304  |
| node_293:<br>feature_name=cg13210470                    | feature_id[4437].value ><br>threshold=0.08023958280682564 |
| node_295:<br>feature_name=cg03731348                    | feature_id[1909].value ><br>threshold=0.8963189721107483  |
| node_297:<br>feature_name=cg26929355                    | feature_id[633].value ><br>threshold=0.7743391394615173   |
| node_299:<br>feature_name=cg02196592                    | feature_id[1435].value <=<br>threshold=0.4457027018070221 |
| Class: malignant peripheral nerve sheath tumour (MPNST) |                                                           |
|                                                         |                                                           |
| Rules_114                                               | passed counts:1                                           |
| node_0:<br>feature_name=cg11915444                      | feature_id[4116].value ><br>threshold=0.3402601182460785  |
| node_10:<br>feature_name=cg12109728                     | feature_id[4182].value ><br>threshold=0.7068270146846771  |
| node_20:<br>feature_name=cg10844382                     | feature_id[3856].value ><br>threshold=0.5988894104957581  |
| node_24:<br>feature_name=cg00631702                     | feature_id[943].value <=<br>threshold=0.37470583617687225 |
| node_25:<br>feature_name=cg07912144                     | feature_id[3075].value ><br>threshold=0.5578519105911255  |
| node_29:<br>feature_name=cg24407065                     | feature_id[388].value ><br>threshold=0.5364363789558411   |
| node_33:<br>feature_name=cg15275017                     | feature_id[5069].value ><br>threshold=0.4538573920726776  |
| node_51:<br>feature_name=cg07281938                     | feature_id[351].value ><br>threshold=0.7506992518901825   |
| node_73:<br>feature_name=cg17524821                     | feature_id[5626].value ><br>threshold=0.4504699558019638  |
| node_75:<br>feature_name=cg02973735                     | feature_id[1677].value ><br>threshold=0.29383400082588196 |

|                                      |                                                            |
|--------------------------------------|------------------------------------------------------------|
| node_77:<br>feature_name=cg23345038  | feature_id[7002].value ><br>threshold=0.6255057156085968   |
| node_79:<br>feature_name=cg17537493  | feature_id[5630].value ><br>threshold=0.5825372636318207   |
| node_85:<br>feature_name=cg12948116  | feature_id[4375].value <=<br>threshold=0.5658791363239288  |
| node_86:<br>feature_name=cg06038180  | feature_id[2529].value ><br>threshold=0.43877437710762024  |
| node_88:<br>feature_name=cg15720017  | feature_id[5175].value ><br>threshold=0.7009969055652618   |
| node_90:<br>feature_name=cg13070215  | feature_id[314].value <=<br>threshold=0.14645694941282272  |
| node_91:<br>feature_name=cg01014262  | feature_id[1082].value <=<br>threshold=0.5737917125225067  |
| node_92:<br>feature_name=cg16863382  | feature_id[5471].value ><br>threshold=0.7200668156147003   |
| node_102:<br>feature_name=cg06633739 | feature_id[2686].value ><br>threshold=0.47115950286388397  |
| node_126:<br>feature_name=cg22946562 | feature_id[744].value ><br>threshold=0.6194809079170227    |
| node_170:<br>feature_name=cg12120430 | feature_id[4185].value ><br>threshold=0.5775820016860962   |
| node_172:<br>feature_name=cg02137970 | feature_id[1411].value ><br>threshold=0.6705857813358307   |
| node_196:<br>feature_name=cg03393445 | feature_id[1807].value ><br>threshold=0.4260125905275345   |
| node_218:<br>feature_name=cg23525541 | feature_id[7049].value ><br>threshold=0.4485483318567276   |
| node_222:<br>feature_name=cg10543634 | feature_id[3775].value ><br>threshold=0.29505227506160736  |
| node_224:<br>feature_name=cg07344990 | feature_id[2926].value ><br>threshold=0.5750180780887604   |
| node_226:<br>feature_name=cg10558233 | feature_id[3780].value <=<br>threshold=0.7217690348625183  |
| node_227:<br>feature_name=cg08097359 | feature_id[3116].value ><br>threshold=0.3598180413246155   |
| node_229:<br>feature_name=cg22737001 | feature_id[6843].value <=<br>threshold=0.46281898021698    |
| node_230:<br>feature_name=cg24276624 | feature_id[7242].value ><br>threshold=0.6169979274272919   |
| node_232:<br>feature_name=cg04026354 | feature_id[1982].value <=<br>threshold=0.42332448065280914 |
| node_233:<br>feature_name=cg06038180 | feature_id[2529].value ><br>threshold=0.6430551409721375   |



|                                      |                                                            |
|--------------------------------------|------------------------------------------------------------|
| node_235:<br>feature_name=cg14104252 | feature_id[4735].value ><br>threshold=0.5213949382305145   |
| node_239:<br>feature_name=cg06711298 | feature_id[2707].value ><br>threshold=0.36770085990428925  |
| node_241:<br>feature_name=cg11703722 | feature_id[4056].value ><br>threshold=0.5125315636396408   |
| node_243:<br>feature_name=cg21230793 | feature_id[6514].value ><br>threshold=0.27807849645614624  |
| node_245:<br>feature_name=cg06225767 | feature_id[2575].value ><br>threshold=0.18034886568784714  |
| node_247:<br>feature_name=cg00941576 | feature_id[1053].value ><br>threshold=0.2476368322968483   |
| node_249:<br>feature_name=cg10149889 | feature_id[3676].value ><br>threshold=0.633601188659668    |
| node_257:<br>feature_name=cg07608094 | feature_id[2999].value ><br>threshold=0.7820693254470825   |
| node_259:<br>feature_name=cg03315432 | feature_id[1783].value ><br>threshold=0.6790387332439423   |
| node_261:<br>feature_name=cg07894983 | feature_id[3070].value ><br>threshold=0.3577418476343155   |
| node_263:<br>feature_name=cg15646741 | feature_id[5160].value ><br>threshold=0.2826688587665558   |
| node_273:<br>feature_name=cg09701233 | feature_id[3546].value ><br>threshold=0.5189756155014038   |
| node_275:<br>feature_name=cg09230938 | feature_id[738].value ><br>threshold=0.3108274042606354    |
| node_277:<br>feature_name=cg05334190 | feature_id[2341].value ><br>threshold=0.2764553725719452   |
| node_279:<br>feature_name=cg15617847 | feature_id[5148].value <=<br>threshold=0.05914711393415928 |
| node_280:<br>feature_name=cg00216961 | feature_id[816].value <=<br>threshold=0.42650654911994934  |
| node_281:<br>feature_name=cg23946462 | feature_id[7146].value <=<br>threshold=0.9469821751117706  |
| node_282:<br>feature_name=cg06143290 | feature_id[2554].value <=<br>threshold=0.9263531863689423  |
| node_283:<br>feature_name=cg21528710 | feature_id[6588].value <=<br>threshold=0.8718287348747253  |
| node_284:<br>feature_name=cg14178043 | feature_id[4760].value <=<br>threshold=0.6852438449859619  |
| node_285:<br>feature_name=cg23906687 | feature_id[7133].value ><br>threshold=0.5761600136756897   |
| node_287:<br>feature_name=cg13838713 | feature_id[4641].value ><br>threshold=0.6983235478401184   |

|                                            |                                                           |
|--------------------------------------------|-----------------------------------------------------------|
| node_289:<br>feature_name=cg10239163       | feature_id[3694].value ><br>threshold=0.49343886971473694 |
| node_291:<br>feature_name=cg01197763       | feature_id[1134].value ><br>threshold=0.5575756281614304  |
| node_293:<br>feature_name=cg13210470       | feature_id[4437].value ><br>threshold=0.08023958280682564 |
| node_295:<br>feature_name=cg03731348       | feature_id[1909].value ><br>threshold=0.8963189721107483  |
| node_297:<br>feature_name=cg26929355       | feature_id[633].value <=<br>threshold=0.7743391394615173  |
| Class: ossifying fibromyxoid tumour (OFMT) |                                                           |
|                                            |                                                           |
| Rules_115                                  | passed counts:1                                           |
| node_0:<br>feature_name=cg11915444         | feature_id[4116].value ><br>threshold=0.3402601182460785  |
| node_10:<br>feature_name=cg12109728        | feature_id[4182].value ><br>threshold=0.7068270146846771  |
| node_20:<br>feature_name=cg10844382        | feature_id[3856].value ><br>threshold=0.5988894104957581  |
| node_24:<br>feature_name=cg00631702        | feature_id[943].value <=<br>threshold=0.37470583617687225 |
| node_25:<br>feature_name=cg07912144        | feature_id[3075].value ><br>threshold=0.5578519105911255  |
| node_29:<br>feature_name=cg24407065        | feature_id[388].value ><br>threshold=0.5364363789558411   |
| node_33:<br>feature_name=cg15275017        | feature_id[5069].value ><br>threshold=0.4538573920726776  |
| node_51:<br>feature_name=cg07281938        | feature_id[351].value ><br>threshold=0.7506992518901825   |
| node_73:<br>feature_name=cg17524821        | feature_id[5626].value ><br>threshold=0.4504699558019638  |
| node_75:<br>feature_name=cg02973735        | feature_id[1677].value ><br>threshold=0.29383400082588196 |
| node_77:<br>feature_name=cg23345038        | feature_id[7002].value ><br>threshold=0.6255057156085968  |
| node_79:<br>feature_name=cg17537493        | feature_id[5630].value ><br>threshold=0.5825372636318207  |
| node_85:<br>feature_name=cg12948116        | feature_id[4375].value <=<br>threshold=0.5658791363239288 |
| node_86:<br>feature_name=cg06038180        | feature_id[2529].value ><br>threshold=0.43877437710762024 |
| node_88:<br>feature_name=cg15720017        | feature_id[5175].value ><br>threshold=0.7009969055652618  |

|                                      |                                                            |
|--------------------------------------|------------------------------------------------------------|
| node_90:<br>feature_name=cg13070215  | feature_id[314].value <=<br>threshold=0.14645694941282272  |
| node_91:<br>feature_name=cg01014262  | feature_id[1082].value <=<br>threshold=0.5737917125225067  |
| node_92:<br>feature_name=cg16863382  | feature_id[5471].value ><br>threshold=0.7200668156147003   |
| node_102:<br>feature_name=cg06633739 | feature_id[2686].value ><br>threshold=0.47115950286388397  |
| node_126:<br>feature_name=cg22946562 | feature_id[744].value ><br>threshold=0.6194809079170227    |
| node_170:<br>feature_name=cg12120430 | feature_id[4185].value ><br>threshold=0.5775820016860962   |
| node_172:<br>feature_name=cg02137970 | feature_id[1411].value ><br>threshold=0.6705857813358307   |
| node_196:<br>feature_name=cg03393445 | feature_id[1807].value ><br>threshold=0.4260125905275345   |
| node_218:<br>feature_name=cg23525541 | feature_id[7049].value ><br>threshold=0.4485483318567276   |
| node_222:<br>feature_name=cg10543634 | feature_id[3775].value ><br>threshold=0.29505227506160736  |
| node_224:<br>feature_name=cg07344990 | feature_id[2926].value ><br>threshold=0.5750180780887604   |
| node_226:<br>feature_name=cg10558233 | feature_id[3780].value <=<br>threshold=0.7217690348625183  |
| node_227:<br>feature_name=cg08097359 | feature_id[3116].value ><br>threshold=0.3598180413246155   |
| node_229:<br>feature_name=cg22737001 | feature_id[6843].value <=<br>threshold=0.46281898021698    |
| node_230:<br>feature_name=cg24276624 | feature_id[7242].value ><br>threshold=0.6169979274272919   |
| node_232:<br>feature_name=cg04026354 | feature_id[1982].value <=<br>threshold=0.42332448065280914 |
| node_233:<br>feature_name=cg06038180 | feature_id[2529].value ><br>threshold=0.6430551409721375   |
| node_235:<br>feature_name=cg14104252 | feature_id[4735].value ><br>threshold=0.5213949382305145   |
| node_239:<br>feature_name=cg06711298 | feature_id[2707].value ><br>threshold=0.36770085990428925  |
| node_241:<br>feature_name=cg11703722 | feature_id[4056].value ><br>threshold=0.5125315636396408   |
| node_243:<br>feature_name=cg21230793 | feature_id[6514].value ><br>threshold=0.27807849645614624  |
| node_245:<br>feature_name=cg06225767 | feature_id[2575].value ><br>threshold=0.18034886568784714  |

|                                          |                                                            |
|------------------------------------------|------------------------------------------------------------|
| node_247:<br>feature_name=cg00941576     | feature_id[1053].value ><br>threshold=0.2476368322968483   |
| node_249:<br>feature_name=cg10149889     | feature_id[3676].value ><br>threshold=0.633601188659668    |
| node_257:<br>feature_name=cg07608094     | feature_id[2999].value ><br>threshold=0.7820693254470825   |
| node_259:<br>feature_name=cg03315432     | feature_id[1783].value ><br>threshold=0.6790387332439423   |
| node_261:<br>feature_name=cg07894983     | feature_id[3070].value ><br>threshold=0.3577418476343155   |
| node_263:<br>feature_name=cg15646741     | feature_id[5160].value ><br>threshold=0.2826688587665558   |
| node_273:<br>feature_name=cg09701233     | feature_id[3546].value ><br>threshold=0.5189756155014038   |
| node_275:<br>feature_name=cg09230938     | feature_id[738].value ><br>threshold=0.3108274042606354    |
| node_277:<br>feature_name=cg05334190     | feature_id[2341].value ><br>threshold=0.2764553725719452   |
| node_279:<br>feature_name=cg15617847     | feature_id[5148].value <=<br>threshold=0.05914711393415928 |
| node_280:<br>feature_name=cg00216961     | feature_id[816].value <=<br>threshold=0.42650654911994934  |
| node_281:<br>feature_name=cg23946462     | feature_id[7146].value <=<br>threshold=0.9469821751117706  |
| node_282:<br>feature_name=cg06143290     | feature_id[2554].value <=<br>threshold=0.9263531863689423  |
| node_283:<br>feature_name=cg21528710     | feature_id[6588].value <=<br>threshold=0.8718287348747253  |
| node_284:<br>feature_name=cg14178043     | feature_id[4760].value <=<br>threshold=0.6852438449859619  |
| node_285:<br>feature_name=cg23906687     | feature_id[7133].value ><br>threshold=0.5761600136756897   |
| node_287:<br>feature_name=cg13838713     | feature_id[4641].value ><br>threshold=0.6983235478401184   |
| node_289:<br>feature_name=cg10239163     | feature_id[3694].value ><br>threshold=0.49343886971473694  |
| node_291:<br>feature_name=cg01197763     | feature_id[1134].value ><br>threshold=0.5575756281614304   |
| node_293:<br>feature_name=cg13210470     | feature_id[4437].value ><br>threshold=0.08023958280682564  |
| node_295:<br>feature_name=cg03731348     | feature_id[1909].value <=<br>threshold=0.8963189721107483  |
| Class: alveolar soft part sarcoma (ASPS) |                                                            |

|                                      |                                                           |
|--------------------------------------|-----------------------------------------------------------|
|                                      |                                                           |
| Rules_116                            | passed counts:1                                           |
| node_0:<br>feature_name=cg11915444   | feature_id[4116].value ><br>threshold=0.3402601182460785  |
| node_10:<br>feature_name=cg12109728  | feature_id[4182].value ><br>threshold=0.7068270146846771  |
| node_20:<br>feature_name=cg10844382  | feature_id[3856].value ><br>threshold=0.5988894104957581  |
| node_24:<br>feature_name=cg00631702  | feature_id[943].value <=<br>threshold=0.37470583617687225 |
| node_25:<br>feature_name=cg07912144  | feature_id[3075].value ><br>threshold=0.5578519105911255  |
| node_29:<br>feature_name=cg24407065  | feature_id[388].value ><br>threshold=0.5364363789558411   |
| node_33:<br>feature_name=cg15275017  | feature_id[5069].value ><br>threshold=0.4538573920726776  |
| node_51:<br>feature_name=cg07281938  | feature_id[351].value ><br>threshold=0.7506992518901825   |
| node_73:<br>feature_name=cg17524821  | feature_id[5626].value ><br>threshold=0.4504699558019638  |
| node_75:<br>feature_name=cg02973735  | feature_id[1677].value ><br>threshold=0.29383400082588196 |
| node_77:<br>feature_name=cg23345038  | feature_id[7002].value ><br>threshold=0.6255057156085968  |
| node_79:<br>feature_name=cg17537493  | feature_id[5630].value ><br>threshold=0.5825372636318207  |
| node_85:<br>feature_name=cg12948116  | feature_id[4375].value <=<br>threshold=0.5658791363239288 |
| node_86:<br>feature_name=cg06038180  | feature_id[2529].value ><br>threshold=0.43877437710762024 |
| node_88:<br>feature_name=cg15720017  | feature_id[5175].value ><br>threshold=0.7009969055652618  |
| node_90:<br>feature_name=cg13070215  | feature_id[314].value <=<br>threshold=0.14645694941282272 |
| node_91:<br>feature_name=cg01014262  | feature_id[1082].value <=<br>threshold=0.5737917125225067 |
| node_92:<br>feature_name=cg16863382  | feature_id[5471].value ><br>threshold=0.7200668156147003  |
| node_102:<br>feature_name=cg06633739 | feature_id[2686].value ><br>threshold=0.47115950286388397 |
| node_126:<br>feature_name=cg22946562 | feature_id[744].value ><br>threshold=0.6194809079170227   |

|                                      |                                                            |
|--------------------------------------|------------------------------------------------------------|
| node_170:<br>feature_name=cg12120430 | feature_id[4185].value ><br>threshold=0.5775820016860962   |
| node_172:<br>feature_name=cg02137970 | feature_id[1411].value ><br>threshold=0.6705857813358307   |
| node_196:<br>feature_name=cg03393445 | feature_id[1807].value ><br>threshold=0.4260125905275345   |
| node_218:<br>feature_name=cg23525541 | feature_id[7049].value ><br>threshold=0.4485483318567276   |
| node_222:<br>feature_name=cg10543634 | feature_id[3775].value ><br>threshold=0.29505227506160736  |
| node_224:<br>feature_name=cg07344990 | feature_id[2926].value ><br>threshold=0.5750180780887604   |
| node_226:<br>feature_name=cg10558233 | feature_id[3780].value <=<br>threshold=0.7217690348625183  |
| node_227:<br>feature_name=cg08097359 | feature_id[3116].value ><br>threshold=0.3598180413246155   |
| node_229:<br>feature_name=cg22737001 | feature_id[6843].value <=<br>threshold=0.46281898021698    |
| node_230:<br>feature_name=cg24276624 | feature_id[7242].value ><br>threshold=0.6169979274272919   |
| node_232:<br>feature_name=cg04026354 | feature_id[1982].value <=<br>threshold=0.42332448065280914 |
| node_233:<br>feature_name=cg06038180 | feature_id[2529].value ><br>threshold=0.6430551409721375   |
| node_235:<br>feature_name=cg14104252 | feature_id[4735].value ><br>threshold=0.5213949382305145   |
| node_239:<br>feature_name=cg06711298 | feature_id[2707].value ><br>threshold=0.36770085990428925  |
| node_241:<br>feature_name=cg11703722 | feature_id[4056].value ><br>threshold=0.5125315636396408   |
| node_243:<br>feature_name=cg21230793 | feature_id[6514].value ><br>threshold=0.27807849645614624  |
| node_245:<br>feature_name=cg06225767 | feature_id[2575].value ><br>threshold=0.18034886568784714  |
| node_247:<br>feature_name=cg00941576 | feature_id[1053].value ><br>threshold=0.2476368322968483   |
| node_249:<br>feature_name=cg10149889 | feature_id[3676].value ><br>threshold=0.633601188659668    |
| node_257:<br>feature_name=cg07608094 | feature_id[2999].value ><br>threshold=0.7820693254470825   |
| node_259:<br>feature_name=cg03315432 | feature_id[1783].value ><br>threshold=0.6790387332439423   |
| node_261:<br>feature_name=cg07894983 | feature_id[3070].value ><br>threshold=0.3577418476343155   |

|                                        |                                                            |
|----------------------------------------|------------------------------------------------------------|
| node_263:<br>feature_name=cg15646741   | feature_id[5160].value ><br>threshold=0.2826688587665558   |
| node_273:<br>feature_name=cg09701233   | feature_id[3546].value ><br>threshold=0.5189756155014038   |
| node_275:<br>feature_name=cg09230938   | feature_id[738].value ><br>threshold=0.3108274042606354    |
| node_277:<br>feature_name=cg05334190   | feature_id[2341].value ><br>threshold=0.2764553725719452   |
| node_279:<br>feature_name=cg15617847   | feature_id[5148].value <=<br>threshold=0.05914711393415928 |
| node_280:<br>feature_name=cg00216961   | feature_id[816].value <=<br>threshold=0.42650654911994934  |
| node_281:<br>feature_name=cg23946462   | feature_id[7146].value <=<br>threshold=0.9469821751117706  |
| node_282:<br>feature_name=cg06143290   | feature_id[2554].value <=<br>threshold=0.9263531863689423  |
| node_283:<br>feature_name=cg21528710   | feature_id[6588].value <=<br>threshold=0.8718287348747253  |
| node_284:<br>feature_name=cg14178043   | feature_id[4760].value <=<br>threshold=0.6852438449859619  |
| node_285:<br>feature_name=cg23906687   | feature_id[7133].value ><br>threshold=0.5761600136756897   |
| node_287:<br>feature_name=cg13838713   | feature_id[4641].value ><br>threshold=0.6983235478401184   |
| node_289:<br>feature_name=cg10239163   | feature_id[3694].value ><br>threshold=0.49343886971473694  |
| node_291:<br>feature_name=cg01197763   | feature_id[1134].value ><br>threshold=0.5575756281614304   |
| node_293:<br>feature_name=cg13210470   | feature_id[4437].value <=<br>threshold=0.08023958280682564 |
| Class: malignant rhabdoid tumour (MRT) |                                                            |
|                                        |                                                            |
| Rules_117                              | passed counts:1                                            |
| node_0:<br>feature_name=cg11915444     | feature_id[4116].value ><br>threshold=0.3402601182460785   |
| node_10:<br>feature_name=cg12109728    | feature_id[4182].value ><br>threshold=0.7068270146846771   |
| node_20:<br>feature_name=cg10844382    | feature_id[3856].value ><br>threshold=0.5988894104957581   |
| node_24:<br>feature_name=cg00631702    | feature_id[943].value <=<br>threshold=0.37470583617687225  |
| node_25:<br>feature_name=cg07912144    | feature_id[3075].value ><br>threshold=0.5578519105911255   |

|                                      |                                                           |
|--------------------------------------|-----------------------------------------------------------|
| node_29:<br>feature_name=cg24407065  | feature_id[388].value ><br>threshold=0.5364363789558411   |
| node_33:<br>feature_name=cg15275017  | feature_id[5069].value ><br>threshold=0.4538573920726776  |
| node_51:<br>feature_name=cg07281938  | feature_id[351].value ><br>threshold=0.7506992518901825   |
| node_73:<br>feature_name=cg17524821  | feature_id[5626].value ><br>threshold=0.4504699558019638  |
| node_75:<br>feature_name=cg02973735  | feature_id[1677].value ><br>threshold=0.29383400082588196 |
| node_77:<br>feature_name=cg23345038  | feature_id[7002].value ><br>threshold=0.6255057156085968  |
| node_79:<br>feature_name=cg17537493  | feature_id[5630].value ><br>threshold=0.5825372636318207  |
| node_85:<br>feature_name=cg12948116  | feature_id[4375].value <=<br>threshold=0.5658791363239288 |
| node_86:<br>feature_name=cg06038180  | feature_id[2529].value ><br>threshold=0.43877437710762024 |
| node_88:<br>feature_name=cg15720017  | feature_id[5175].value ><br>threshold=0.7009969055652618  |
| node_90:<br>feature_name=cg13070215  | feature_id[314].value <=<br>threshold=0.14645694941282272 |
| node_91:<br>feature_name=cg01014262  | feature_id[1082].value <=<br>threshold=0.5737917125225067 |
| node_92:<br>feature_name=cg16863382  | feature_id[5471].value ><br>threshold=0.7200668156147003  |
| node_102:<br>feature_name=cg06633739 | feature_id[2686].value ><br>threshold=0.47115950286388397 |
| node_126:<br>feature_name=cg22946562 | feature_id[744].value ><br>threshold=0.6194809079170227   |
| node_170:<br>feature_name=cg12120430 | feature_id[4185].value ><br>threshold=0.5775820016860962  |
| node_172:<br>feature_name=cg02137970 | feature_id[1411].value ><br>threshold=0.6705857813358307  |
| node_196:<br>feature_name=cg03393445 | feature_id[1807].value ><br>threshold=0.4260125905275345  |
| node_218:<br>feature_name=cg23525541 | feature_id[7049].value ><br>threshold=0.4485483318567276  |
| node_222:<br>feature_name=cg10543634 | feature_id[3775].value ><br>threshold=0.29505227506160736 |
| node_224:<br>feature_name=cg07344990 | feature_id[2926].value ><br>threshold=0.5750180780887604  |
| node_226:<br>feature_name=cg10558233 | feature_id[3780].value <=<br>threshold=0.7217690348625183 |



|                                      |                                                            |
|--------------------------------------|------------------------------------------------------------|
| node_227:<br>feature_name=cg08097359 | feature_id[3116].value ><br>threshold=0.3598180413246155   |
| node_229:<br>feature_name=cg22737001 | feature_id[6843].value <=<br>threshold=0.46281898021698    |
| node_230:<br>feature_name=cg24276624 | feature_id[7242].value ><br>threshold=0.6169979274272919   |
| node_232:<br>feature_name=cg04026354 | feature_id[1982].value <=<br>threshold=0.42332448065280914 |
| node_233:<br>feature_name=cg06038180 | feature_id[2529].value ><br>threshold=0.6430551409721375   |
| node_235:<br>feature_name=cg14104252 | feature_id[4735].value ><br>threshold=0.5213949382305145   |
| node_239:<br>feature_name=cg06711298 | feature_id[2707].value ><br>threshold=0.36770085990428925  |
| node_241:<br>feature_name=cg11703722 | feature_id[4056].value ><br>threshold=0.5125315636396408   |
| node_243:<br>feature_name=cg21230793 | feature_id[6514].value ><br>threshold=0.27807849645614624  |
| node_245:<br>feature_name=cg06225767 | feature_id[2575].value ><br>threshold=0.18034886568784714  |
| node_247:<br>feature_name=cg00941576 | feature_id[1053].value ><br>threshold=0.2476368322968483   |
| node_249:<br>feature_name=cg10149889 | feature_id[3676].value ><br>threshold=0.633601188659668    |
| node_257:<br>feature_name=cg07608094 | feature_id[2999].value ><br>threshold=0.7820693254470825   |
| node_259:<br>feature_name=cg03315432 | feature_id[1783].value ><br>threshold=0.6790387332439423   |
| node_261:<br>feature_name=cg07894983 | feature_id[3070].value ><br>threshold=0.3577418476343155   |
| node_263:<br>feature_name=cg15646741 | feature_id[5160].value ><br>threshold=0.2826688587665558   |
| node_273:<br>feature_name=cg09701233 | feature_id[3546].value ><br>threshold=0.5189756155014038   |
| node_275:<br>feature_name=cg09230938 | feature_id[738].value ><br>threshold=0.3108274042606354    |
| node_277:<br>feature_name=cg05334190 | feature_id[2341].value ><br>threshold=0.2764553725719452   |
| node_279:<br>feature_name=cg15617847 | feature_id[5148].value <=<br>threshold=0.05914711393415928 |
| node_280:<br>feature_name=cg00216961 | feature_id[816].value <=<br>threshold=0.42650654911994934  |
| node_281:<br>feature_name=cg23946462 | feature_id[7146].value <=<br>threshold=0.9469821751117706  |

|                                      |                                                           |
|--------------------------------------|-----------------------------------------------------------|
| node_282:<br>feature_name=cg06143290 | feature_id[2554].value <=<br>threshold=0.9263531863689423 |
| node_283:<br>feature_name=cg21528710 | feature_id[6588].value <=<br>threshold=0.8718287348747253 |
| node_284:<br>feature_name=cg14178043 | feature_id[4760].value <=<br>threshold=0.6852438449859619 |
| node_285:<br>feature_name=cg23906687 | feature_id[7133].value ><br>threshold=0.5761600136756897  |
| node_287:<br>feature_name=cg13838713 | feature_id[4641].value ><br>threshold=0.6983235478401184  |
| node_289:<br>feature_name=cg10239163 | feature_id[3694].value ><br>threshold=0.49343886971473694 |
| node_291:<br>feature_name=cg01197763 | feature_id[1134].value <=<br>threshold=0.5575756281614304 |
| Class: synovial sarcoma (SYSA)       |                                                           |
|                                      |                                                           |
| Rules_118                            | passed counts:1                                           |
| node_0:<br>feature_name=cg11915444   | feature_id[4116].value ><br>threshold=0.3402601182460785  |
| node_10:<br>feature_name=cg12109728  | feature_id[4182].value ><br>threshold=0.7068270146846771  |
| node_20:<br>feature_name=cg10844382  | feature_id[3856].value ><br>threshold=0.5988894104957581  |
| node_24:<br>feature_name=cg00631702  | feature_id[943].value <=<br>threshold=0.37470583617687225 |
| node_25:<br>feature_name=cg07912144  | feature_id[3075].value ><br>threshold=0.5578519105911255  |
| node_29:<br>feature_name=cg24407065  | feature_id[388].value ><br>threshold=0.5364363789558411   |
| node_33:<br>feature_name=cg15275017  | feature_id[5069].value ><br>threshold=0.4538573920726776  |
| node_51:<br>feature_name=cg07281938  | feature_id[351].value ><br>threshold=0.7506992518901825   |
| node_73:<br>feature_name=cg17524821  | feature_id[5626].value ><br>threshold=0.4504699558019638  |
| node_75:<br>feature_name=cg02973735  | feature_id[1677].value ><br>threshold=0.29383400082588196 |
| node_77:<br>feature_name=cg23345038  | feature_id[7002].value ><br>threshold=0.6255057156085968  |
| node_79:<br>feature_name=cg17537493  | feature_id[5630].value ><br>threshold=0.5825372636318207  |
| node_85:<br>feature_name=cg12948116  | feature_id[4375].value <=<br>threshold=0.5658791363239288 |

|                                      |                                                            |
|--------------------------------------|------------------------------------------------------------|
| node_86:<br>feature_name=cg06038180  | feature_id[2529].value ><br>threshold=0.43877437710762024  |
| node_88:<br>feature_name=cg15720017  | feature_id[5175].value ><br>threshold=0.7009969055652618   |
| node_90:<br>feature_name=cg13070215  | feature_id[314].value <=<br>threshold=0.14645694941282272  |
| node_91:<br>feature_name=cg01014262  | feature_id[1082].value <=<br>threshold=0.5737917125225067  |
| node_92:<br>feature_name=cg16863382  | feature_id[5471].value ><br>threshold=0.7200668156147003   |
| node_102:<br>feature_name=cg06633739 | feature_id[2686].value ><br>threshold=0.47115950286388397  |
| node_126:<br>feature_name=cg22946562 | feature_id[744].value ><br>threshold=0.6194809079170227    |
| node_170:<br>feature_name=cg12120430 | feature_id[4185].value ><br>threshold=0.5775820016860962   |
| node_172:<br>feature_name=cg02137970 | feature_id[1411].value ><br>threshold=0.6705857813358307   |
| node_196:<br>feature_name=cg03393445 | feature_id[1807].value ><br>threshold=0.4260125905275345   |
| node_218:<br>feature_name=cg23525541 | feature_id[7049].value ><br>threshold=0.4485483318567276   |
| node_222:<br>feature_name=cg10543634 | feature_id[3775].value ><br>threshold=0.29505227506160736  |
| node_224:<br>feature_name=cg07344990 | feature_id[2926].value ><br>threshold=0.5750180780887604   |
| node_226:<br>feature_name=cg10558233 | feature_id[3780].value <=<br>threshold=0.7217690348625183  |
| node_227:<br>feature_name=cg08097359 | feature_id[3116].value ><br>threshold=0.3598180413246155   |
| node_229:<br>feature_name=cg22737001 | feature_id[6843].value <=<br>threshold=0.46281898021698    |
| node_230:<br>feature_name=cg24276624 | feature_id[7242].value ><br>threshold=0.6169979274272919   |
| node_232:<br>feature_name=cg04026354 | feature_id[1982].value <=<br>threshold=0.42332448065280914 |
| node_233:<br>feature_name=cg06038180 | feature_id[2529].value ><br>threshold=0.6430551409721375   |
| node_235:<br>feature_name=cg14104252 | feature_id[4735].value ><br>threshold=0.5213949382305145   |
| node_239:<br>feature_name=cg06711298 | feature_id[2707].value ><br>threshold=0.36770085990428925  |
| node_241:<br>feature_name=cg11703722 | feature_id[4056].value ><br>threshold=0.5125315636396408   |

|                                      |                                                           |
|--------------------------------------|-----------------------------------------------------------|
| node_243:<br>feature_name=cg21230793 | feature_id[6514].value ><br>threshold=0.27807849645614624 |
| node_245:<br>feature_name=cg06225767 | feature_id[2575].value ><br>threshold=0.18034886568784714 |
| node_247:<br>feature_name=cg00941576 | feature_id[1053].value ><br>threshold=0.2476368322968483  |
| node_249:<br>feature_name=cg10149889 | feature_id[3676].value ><br>threshold=0.633601188659668   |
| node_257:<br>feature_name=cg07608094 | feature_id[2999].value ><br>threshold=0.7820693254470825  |
| node_259:<br>feature_name=cg03315432 | feature_id[1783].value ><br>threshold=0.6790387332439423  |
| node_261:<br>feature_name=cg07894983 | feature_id[3070].value ><br>threshold=0.3577418476343155  |
| node_263:<br>feature_name=cg15646741 | feature_id[5160].value <=<br>threshold=0.2826688587665558 |
| node_264:<br>feature_name=cg05400196 | feature_id[2366].value <=<br>threshold=0.666697084903717  |
| node_265:<br>feature_name=cg11936643 | feature_id[4120].value ><br>threshold=0.19320054352283478 |
| node_267:<br>feature_name=cg02436098 | feature_id[1507].value ><br>threshold=0.20541958510875702 |
| node_269:<br>feature_name=cg05041061 | feature_id[2257].value ><br>threshold=0.778236985206604   |
| Class: Kaposi sarcoma (KS)           |                                                           |
|                                      |                                                           |
| Rules_119                            | passed counts:1                                           |
| node_0:<br>feature_name=cg11915444   | feature_id[4116].value ><br>threshold=0.3402601182460785  |
| node_10:<br>feature_name=cg12109728  | feature_id[4182].value ><br>threshold=0.7068270146846771  |
| node_20:<br>feature_name=cg10844382  | feature_id[3856].value ><br>threshold=0.5988894104957581  |
| node_24:<br>feature_name=cg00631702  | feature_id[943].value <=<br>threshold=0.37470583617687225 |
| node_25:<br>feature_name=cg07912144  | feature_id[3075].value ><br>threshold=0.5578519105911255  |
| node_29:<br>feature_name=cg24407065  | feature_id[388].value ><br>threshold=0.5364363789558411   |
| node_33:<br>feature_name=cg15275017  | feature_id[5069].value ><br>threshold=0.4538573920726776  |
| node_51:<br>feature_name=cg07281938  | feature_id[351].value ><br>threshold=0.7506992518901825   |

|                                      |                                                           |
|--------------------------------------|-----------------------------------------------------------|
| node_73:<br>feature_name=cg17524821  | feature_id[5626].value ><br>threshold=0.4504699558019638  |
| node_75:<br>feature_name=cg02973735  | feature_id[1677].value ><br>threshold=0.29383400082588196 |
| node_77:<br>feature_name=cg23345038  | feature_id[7002].value ><br>threshold=0.6255057156085968  |
| node_79:<br>feature_name=cg17537493  | feature_id[5630].value ><br>threshold=0.5825372636318207  |
| node_85:<br>feature_name=cg12948116  | feature_id[4375].value <=<br>threshold=0.5658791363239288 |
| node_86:<br>feature_name=cg06038180  | feature_id[2529].value ><br>threshold=0.43877437710762024 |
| node_88:<br>feature_name=cg15720017  | feature_id[5175].value ><br>threshold=0.7009969055652618  |
| node_90:<br>feature_name=cg13070215  | feature_id[314].value <=<br>threshold=0.14645694941282272 |
| node_91:<br>feature_name=cg01014262  | feature_id[1082].value <=<br>threshold=0.5737917125225067 |
| node_92:<br>feature_name=cg16863382  | feature_id[5471].value ><br>threshold=0.7200668156147003  |
| node_102:<br>feature_name=cg06633739 | feature_id[2686].value ><br>threshold=0.47115950286388397 |
| node_126:<br>feature_name=cg22946562 | feature_id[744].value ><br>threshold=0.6194809079170227   |
| node_170:<br>feature_name=cg12120430 | feature_id[4185].value ><br>threshold=0.5775820016860962  |
| node_172:<br>feature_name=cg02137970 | feature_id[1411].value ><br>threshold=0.6705857813358307  |
| node_196:<br>feature_name=cg03393445 | feature_id[1807].value ><br>threshold=0.4260125905275345  |
| node_218:<br>feature_name=cg23525541 | feature_id[7049].value ><br>threshold=0.4485483318567276  |
| node_222:<br>feature_name=cg10543634 | feature_id[3775].value ><br>threshold=0.29505227506160736 |
| node_224:<br>feature_name=cg07344990 | feature_id[2926].value ><br>threshold=0.5750180780887604  |
| node_226:<br>feature_name=cg10558233 | feature_id[3780].value <=<br>threshold=0.7217690348625183 |
| node_227:<br>feature_name=cg08097359 | feature_id[3116].value ><br>threshold=0.3598180413246155  |
| node_229:<br>feature_name=cg22737001 | feature_id[6843].value <=<br>threshold=0.46281898021698   |
| node_230:<br>feature_name=cg24276624 | feature_id[7242].value ><br>threshold=0.6169979274272919  |

|                                          |                                                            |
|------------------------------------------|------------------------------------------------------------|
| node_232:<br>feature_name=cg04026354     | feature_id[1982].value <=<br>threshold=0.42332448065280914 |
| node_233:<br>feature_name=cg06038180     | feature_id[2529].value ><br>threshold=0.6430551409721375   |
| node_235:<br>feature_name=cg14104252     | feature_id[4735].value ><br>threshold=0.5213949382305145   |
| node_239:<br>feature_name=cg06711298     | feature_id[2707].value ><br>threshold=0.36770085990428925  |
| node_241:<br>feature_name=cg11703722     | feature_id[4056].value ><br>threshold=0.5125315636396408   |
| node_243:<br>feature_name=cg21230793     | feature_id[6514].value ><br>threshold=0.27807849645614624  |
| node_245:<br>feature_name=cg06225767     | feature_id[2575].value ><br>threshold=0.18034886568784714  |
| node_247:<br>feature_name=cg00941576     | feature_id[1053].value ><br>threshold=0.2476368322968483   |
| node_249:<br>feature_name=cg10149889     | feature_id[3676].value ><br>threshold=0.633601188659668    |
| node_257:<br>feature_name=cg07608094     | feature_id[2999].value ><br>threshold=0.7820693254470825   |
| node_259:<br>feature_name=cg03315432     | feature_id[1783].value ><br>threshold=0.6790387332439423   |
| node_261:<br>feature_name=cg07894983     | feature_id[3070].value ><br>threshold=0.3577418476343155   |
| node_263:<br>feature_name=cg15646741     | feature_id[5160].value <=<br>threshold=0.2826688587665558  |
| node_264:<br>feature_name=cg05400196     | feature_id[2366].value <=<br>threshold=0.666697084903717   |
| node_265:<br>feature_name=cg11936643     | feature_id[4120].value ><br>threshold=0.19320054352283478  |
| node_267:<br>feature_name=cg02436098     | feature_id[1507].value ><br>threshold=0.20541958510875702  |
| node_269:<br>feature_name=cg05041061     | feature_id[2257].value <=<br>threshold=0.778236985206604   |
| Class: alveolar soft part sarcoma (ASPS) |                                                            |
|                                          |                                                            |
| Rules_120                                | passed counts:1                                            |
| node_0:<br>feature_name=cg11915444       | feature_id[4116].value ><br>threshold=0.3402601182460785   |
| node_10:<br>feature_name=cg12109728      | feature_id[4182].value ><br>threshold=0.7068270146846771   |
| node_20:<br>feature_name=cg10844382      | feature_id[3856].value ><br>threshold=0.5988894104957581   |

|                                      |                                                           |
|--------------------------------------|-----------------------------------------------------------|
| node_24:<br>feature_name=cg00631702  | feature_id[943].value <=<br>threshold=0.37470583617687225 |
| node_25:<br>feature_name=cg07912144  | feature_id[3075].value ><br>threshold=0.5578519105911255  |
| node_29:<br>feature_name=cg24407065  | feature_id[388].value ><br>threshold=0.5364363789558411   |
| node_33:<br>feature_name=cg15275017  | feature_id[5069].value ><br>threshold=0.4538573920726776  |
| node_51:<br>feature_name=cg07281938  | feature_id[351].value ><br>threshold=0.7506992518901825   |
| node_73:<br>feature_name=cg17524821  | feature_id[5626].value ><br>threshold=0.4504699558019638  |
| node_75:<br>feature_name=cg02973735  | feature_id[1677].value ><br>threshold=0.29383400082588196 |
| node_77:<br>feature_name=cg23345038  | feature_id[7002].value ><br>threshold=0.6255057156085968  |
| node_79:<br>feature_name=cg17537493  | feature_id[5630].value ><br>threshold=0.5825372636318207  |
| node_85:<br>feature_name=cg12948116  | feature_id[4375].value <=<br>threshold=0.5658791363239288 |
| node_86:<br>feature_name=cg06038180  | feature_id[2529].value ><br>threshold=0.43877437710762024 |
| node_88:<br>feature_name=cg15720017  | feature_id[5175].value ><br>threshold=0.7009969055652618  |
| node_90:<br>feature_name=cg13070215  | feature_id[314].value <=<br>threshold=0.14645694941282272 |
| node_91:<br>feature_name=cg01014262  | feature_id[1082].value <=<br>threshold=0.5737917125225067 |
| node_92:<br>feature_name=cg16863382  | feature_id[5471].value ><br>threshold=0.7200668156147003  |
| node_102:<br>feature_name=cg06633739 | feature_id[2686].value ><br>threshold=0.47115950286388397 |
| node_126:<br>feature_name=cg22946562 | feature_id[744].value ><br>threshold=0.6194809079170227   |
| node_170:<br>feature_name=cg12120430 | feature_id[4185].value ><br>threshold=0.5775820016860962  |
| node_172:<br>feature_name=cg02137970 | feature_id[1411].value ><br>threshold=0.6705857813358307  |
| node_196:<br>feature_name=cg03393445 | feature_id[1807].value ><br>threshold=0.4260125905275345  |
| node_218:<br>feature_name=cg23525541 | feature_id[7049].value ><br>threshold=0.4485483318567276  |
| node_222:<br>feature_name=cg10543634 | feature_id[3775].value ><br>threshold=0.29505227506160736 |

|                                      |                                                            |
|--------------------------------------|------------------------------------------------------------|
| node_224:<br>feature_name=cg07344990 | feature_id[2926].value ><br>threshold=0.5750180780887604   |
| node_226:<br>feature_name=cg10558233 | feature_id[3780].value <=<br>threshold=0.7217690348625183  |
| node_227:<br>feature_name=cg08097359 | feature_id[3116].value ><br>threshold=0.3598180413246155   |
| node_229:<br>feature_name=cg22737001 | feature_id[6843].value <=<br>threshold=0.46281898021698    |
| node_230:<br>feature_name=cg24276624 | feature_id[7242].value ><br>threshold=0.6169979274272919   |
| node_232:<br>feature_name=cg04026354 | feature_id[1982].value <=<br>threshold=0.42332448065280914 |
| node_233:<br>feature_name=cg06038180 | feature_id[2529].value ><br>threshold=0.6430551409721375   |
| node_235:<br>feature_name=cg14104252 | feature_id[4735].value ><br>threshold=0.5213949382305145   |
| node_239:<br>feature_name=cg06711298 | feature_id[2707].value ><br>threshold=0.36770085990428925  |
| node_241:<br>feature_name=cg11703722 | feature_id[4056].value ><br>threshold=0.5125315636396408   |
| node_243:<br>feature_name=cg21230793 | feature_id[6514].value ><br>threshold=0.27807849645614624  |
| node_245:<br>feature_name=cg06225767 | feature_id[2575].value ><br>threshold=0.18034886568784714  |
| node_247:<br>feature_name=cg00941576 | feature_id[1053].value ><br>threshold=0.2476368322968483   |
| node_249:<br>feature_name=cg10149889 | feature_id[3676].value ><br>threshold=0.633601188659668    |
| node_257:<br>feature_name=cg07608094 | feature_id[2999].value ><br>threshold=0.7820693254470825   |
| node_259:<br>feature_name=cg03315432 | feature_id[1783].value ><br>threshold=0.6790387332439423   |
| node_261:<br>feature_name=cg07894983 | feature_id[3070].value ><br>threshold=0.3577418476343155   |
| node_263:<br>feature_name=cg15646741 | feature_id[5160].value <=<br>threshold=0.2826688587665558  |
| node_264:<br>feature_name=cg05400196 | feature_id[2366].value <=<br>threshold=0.666697084903717   |
| node_265:<br>feature_name=cg11936643 | feature_id[4120].value ><br>threshold=0.19320054352283478  |
| node_267:<br>feature_name=cg02436098 | feature_id[1507].value <=<br>threshold=0.20541958510875702 |
| Class: sarcoma (SARC)                |                                                            |



|                                      |                                                           |
|--------------------------------------|-----------------------------------------------------------|
|                                      |                                                           |
| Rules_121                            | passed counts:1                                           |
| node_0:<br>feature_name=cg11915444   | feature_id[4116].value ><br>threshold=0.3402601182460785  |
| node_10:<br>feature_name=cg12109728  | feature_id[4182].value ><br>threshold=0.7068270146846771  |
| node_20:<br>feature_name=cg10844382  | feature_id[3856].value ><br>threshold=0.5988894104957581  |
| node_24:<br>feature_name=cg00631702  | feature_id[943].value <=<br>threshold=0.37470583617687225 |
| node_25:<br>feature_name=cg07912144  | feature_id[3075].value ><br>threshold=0.5578519105911255  |
| node_29:<br>feature_name=cg24407065  | feature_id[388].value ><br>threshold=0.5364363789558411   |
| node_33:<br>feature_name=cg15275017  | feature_id[5069].value ><br>threshold=0.4538573920726776  |
| node_51:<br>feature_name=cg07281938  | feature_id[351].value ><br>threshold=0.7506992518901825   |
| node_73:<br>feature_name=cg17524821  | feature_id[5626].value ><br>threshold=0.4504699558019638  |
| node_75:<br>feature_name=cg02973735  | feature_id[1677].value ><br>threshold=0.29383400082588196 |
| node_77:<br>feature_name=cg23345038  | feature_id[7002].value ><br>threshold=0.6255057156085968  |
| node_79:<br>feature_name=cg17537493  | feature_id[5630].value ><br>threshold=0.5825372636318207  |
| node_85:<br>feature_name=cg12948116  | feature_id[4375].value <=<br>threshold=0.5658791363239288 |
| node_86:<br>feature_name=cg06038180  | feature_id[2529].value ><br>threshold=0.43877437710762024 |
| node_88:<br>feature_name=cg15720017  | feature_id[5175].value ><br>threshold=0.7009969055652618  |
| node_90:<br>feature_name=cg13070215  | feature_id[314].value <=<br>threshold=0.14645694941282272 |
| node_91:<br>feature_name=cg01014262  | feature_id[1082].value <=<br>threshold=0.5737917125225067 |
| node_92:<br>feature_name=cg16863382  | feature_id[5471].value ><br>threshold=0.7200668156147003  |
| node_102:<br>feature_name=cg06633739 | feature_id[2686].value ><br>threshold=0.47115950286388397 |
| node_126:<br>feature_name=cg22946562 | feature_id[744].value ><br>threshold=0.6194809079170227   |

|                                      |                                                            |
|--------------------------------------|------------------------------------------------------------|
| node_170:<br>feature_name=cg12120430 | feature_id[4185].value ><br>threshold=0.5775820016860962   |
| node_172:<br>feature_name=cg02137970 | feature_id[1411].value ><br>threshold=0.6705857813358307   |
| node_196:<br>feature_name=cg03393445 | feature_id[1807].value ><br>threshold=0.4260125905275345   |
| node_218:<br>feature_name=cg23525541 | feature_id[7049].value ><br>threshold=0.4485483318567276   |
| node_222:<br>feature_name=cg10543634 | feature_id[3775].value ><br>threshold=0.29505227506160736  |
| node_224:<br>feature_name=cg07344990 | feature_id[2926].value ><br>threshold=0.5750180780887604   |
| node_226:<br>feature_name=cg10558233 | feature_id[3780].value <=<br>threshold=0.7217690348625183  |
| node_227:<br>feature_name=cg08097359 | feature_id[3116].value ><br>threshold=0.3598180413246155   |
| node_229:<br>feature_name=cg22737001 | feature_id[6843].value <=<br>threshold=0.46281898021698    |
| node_230:<br>feature_name=cg24276624 | feature_id[7242].value ><br>threshold=0.6169979274272919   |
| node_232:<br>feature_name=cg04026354 | feature_id[1982].value <=<br>threshold=0.42332448065280914 |
| node_233:<br>feature_name=cg06038180 | feature_id[2529].value ><br>threshold=0.6430551409721375   |
| node_235:<br>feature_name=cg14104252 | feature_id[4735].value ><br>threshold=0.5213949382305145   |
| node_239:<br>feature_name=cg06711298 | feature_id[2707].value ><br>threshold=0.36770085990428925  |
| node_241:<br>feature_name=cg11703722 | feature_id[4056].value ><br>threshold=0.5125315636396408   |
| node_243:<br>feature_name=cg21230793 | feature_id[6514].value ><br>threshold=0.27807849645614624  |
| node_245:<br>feature_name=cg06225767 | feature_id[2575].value ><br>threshold=0.18034886568784714  |
| node_247:<br>feature_name=cg00941576 | feature_id[1053].value ><br>threshold=0.2476368322968483   |
| node_249:<br>feature_name=cg10149889 | feature_id[3676].value <=<br>threshold=0.633601188659668   |
| node_250:<br>feature_name=cg03631837 | feature_id[1881].value <=<br>threshold=0.8389041423797607  |
| node_251:<br>feature_name=cg18201671 | feature_id[5790].value ><br>threshold=0.7097389698028564   |
| node_253:<br>feature_name=cg14406727 | feature_id[4837].value ><br>threshold=0.7478070855140686   |

|                                      |                                                           |
|--------------------------------------|-----------------------------------------------------------|
| Class: leiomyosarcoma (LMS)          |                                                           |
|                                      |                                                           |
| Rules_122                            | passed counts:1                                           |
| node_0:<br>feature_name=cg11915444   | feature_id[4116].value ><br>threshold=0.3402601182460785  |
| node_10:<br>feature_name=cg12109728  | feature_id[4182].value ><br>threshold=0.7068270146846771  |
| node_20:<br>feature_name=cg10844382  | feature_id[3856].value ><br>threshold=0.5988894104957581  |
| node_24:<br>feature_name=cg00631702  | feature_id[943].value <=<br>threshold=0.37470583617687225 |
| node_25:<br>feature_name=cg07912144  | feature_id[3075].value ><br>threshold=0.5578519105911255  |
| node_29:<br>feature_name=cg24407065  | feature_id[388].value ><br>threshold=0.5364363789558411   |
| node_33:<br>feature_name=cg15275017  | feature_id[5069].value ><br>threshold=0.4538573920726776  |
| node_51:<br>feature_name=cg07281938  | feature_id[351].value ><br>threshold=0.7506992518901825   |
| node_73:<br>feature_name=cg17524821  | feature_id[5626].value ><br>threshold=0.4504699558019638  |
| node_75:<br>feature_name=cg02973735  | feature_id[1677].value ><br>threshold=0.29383400082588196 |
| node_77:<br>feature_name=cg23345038  | feature_id[7002].value ><br>threshold=0.6255057156085968  |
| node_79:<br>feature_name=cg17537493  | feature_id[5630].value ><br>threshold=0.5825372636318207  |
| node_85:<br>feature_name=cg12948116  | feature_id[4375].value <=<br>threshold=0.5658791363239288 |
| node_86:<br>feature_name=cg06038180  | feature_id[2529].value ><br>threshold=0.43877437710762024 |
| node_88:<br>feature_name=cg15720017  | feature_id[5175].value ><br>threshold=0.7009969055652618  |
| node_90:<br>feature_name=cg13070215  | feature_id[314].value <=<br>threshold=0.14645694941282272 |
| node_91:<br>feature_name=cg01014262  | feature_id[1082].value <=<br>threshold=0.5737917125225067 |
| node_92:<br>feature_name=cg16863382  | feature_id[5471].value ><br>threshold=0.7200668156147003  |
| node_102:<br>feature_name=cg06633739 | feature_id[2686].value ><br>threshold=0.47115950286388397 |
| node_126:<br>feature_name=cg22946562 | feature_id[744].value ><br>threshold=0.6194809079170227   |

|                                      |                                                            |
|--------------------------------------|------------------------------------------------------------|
| node_170:<br>feature_name=cg12120430 | feature_id[4185].value ><br>threshold=0.5775820016860962   |
| node_172:<br>feature_name=cg02137970 | feature_id[1411].value ><br>threshold=0.6705857813358307   |
| node_196:<br>feature_name=cg03393445 | feature_id[1807].value ><br>threshold=0.4260125905275345   |
| node_218:<br>feature_name=cg23525541 | feature_id[7049].value ><br>threshold=0.4485483318567276   |
| node_222:<br>feature_name=cg10543634 | feature_id[3775].value ><br>threshold=0.29505227506160736  |
| node_224:<br>feature_name=cg07344990 | feature_id[2926].value ><br>threshold=0.5750180780887604   |
| node_226:<br>feature_name=cg10558233 | feature_id[3780].value <=<br>threshold=0.7217690348625183  |
| node_227:<br>feature_name=cg08097359 | feature_id[3116].value ><br>threshold=0.3598180413246155   |
| node_229:<br>feature_name=cg22737001 | feature_id[6843].value <=<br>threshold=0.46281898021698    |
| node_230:<br>feature_name=cg24276624 | feature_id[7242].value ><br>threshold=0.6169979274272919   |
| node_232:<br>feature_name=cg04026354 | feature_id[1982].value <=<br>threshold=0.42332448065280914 |
| node_233:<br>feature_name=cg06038180 | feature_id[2529].value ><br>threshold=0.6430551409721375   |
| node_235:<br>feature_name=cg14104252 | feature_id[4735].value ><br>threshold=0.5213949382305145   |
| node_239:<br>feature_name=cg06711298 | feature_id[2707].value ><br>threshold=0.36770085990428925  |
| node_241:<br>feature_name=cg11703722 | feature_id[4056].value ><br>threshold=0.5125315636396408   |
| node_243:<br>feature_name=cg21230793 | feature_id[6514].value ><br>threshold=0.27807849645614624  |
| node_245:<br>feature_name=cg06225767 | feature_id[2575].value ><br>threshold=0.18034886568784714  |
| node_247:<br>feature_name=cg00941576 | feature_id[1053].value ><br>threshold=0.2476368322968483   |
| node_249:<br>feature_name=cg10149889 | feature_id[3676].value <=<br>threshold=0.633601188659668   |
| node_250:<br>feature_name=cg03631837 | feature_id[1881].value <=<br>threshold=0.8389041423797607  |
| node_251:<br>feature_name=cg18201671 | feature_id[5790].value ><br>threshold=0.7097389698028564   |
| node_253:<br>feature_name=cg14406727 | feature_id[4837].value <=<br>threshold=0.7478070855140686  |

|                                                                      |                                                           |
|----------------------------------------------------------------------|-----------------------------------------------------------|
| Class: atypical fibroxanthoma (AFX)/pleomorphic dermal sarcoma (PDS) |                                                           |
|                                                                      |                                                           |
| Rules_123                                                            | passed counts:1                                           |
| node_0:<br>feature_name=cg11915444                                   | feature_id[4116].value ><br>threshold=0.3402601182460785  |
| node_10:<br>feature_name=cg12109728                                  | feature_id[4182].value ><br>threshold=0.7068270146846771  |
| node_20:<br>feature_name=cg10844382                                  | feature_id[3856].value ><br>threshold=0.5988894104957581  |
| node_24:<br>feature_name=cg00631702                                  | feature_id[943].value <=<br>threshold=0.37470583617687225 |
| node_25:<br>feature_name=cg07912144                                  | feature_id[3075].value ><br>threshold=0.5578519105911255  |
| node_29:<br>feature_name=cg24407065                                  | feature_id[388].value ><br>threshold=0.5364363789558411   |
| node_33:<br>feature_name=cg15275017                                  | feature_id[5069].value ><br>threshold=0.4538573920726776  |
| node_51:<br>feature_name=cg07281938                                  | feature_id[351].value ><br>threshold=0.7506992518901825   |
| node_73:<br>feature_name=cg17524821                                  | feature_id[5626].value ><br>threshold=0.4504699558019638  |
| node_75:<br>feature_name=cg02973735                                  | feature_id[1677].value ><br>threshold=0.29383400082588196 |
| node_77:<br>feature_name=cg23345038                                  | feature_id[7002].value ><br>threshold=0.6255057156085968  |
| node_79:<br>feature_name=cg17537493                                  | feature_id[5630].value ><br>threshold=0.5825372636318207  |
| node_85:<br>feature_name=cg12948116                                  | feature_id[4375].value <=<br>threshold=0.5658791363239288 |
| node_86:<br>feature_name=cg06038180                                  | feature_id[2529].value ><br>threshold=0.43877437710762024 |
| node_88:<br>feature_name=cg15720017                                  | feature_id[5175].value ><br>threshold=0.7009969055652618  |
| node_90:<br>feature_name=cg13070215                                  | feature_id[314].value <=<br>threshold=0.14645694941282272 |
| node_91:<br>feature_name=cg01014262                                  | feature_id[1082].value <=<br>threshold=0.5737917125225067 |
| node_92:<br>feature_name=cg16863382                                  | feature_id[5471].value ><br>threshold=0.7200668156147003  |
| node_102:<br>feature_name=cg06633739                                 | feature_id[2686].value ><br>threshold=0.47115950286388397 |
| node_126:<br>feature_name=cg22946562                                 | feature_id[744].value ><br>threshold=0.6194809079170227   |

|                                      |                                                            |
|--------------------------------------|------------------------------------------------------------|
| node_170:<br>feature_name=cg12120430 | feature_id[4185].value ><br>threshold=0.5775820016860962   |
| node_172:<br>feature_name=cg02137970 | feature_id[1411].value ><br>threshold=0.6705857813358307   |
| node_196:<br>feature_name=cg03393445 | feature_id[1807].value ><br>threshold=0.4260125905275345   |
| node_218:<br>feature_name=cg23525541 | feature_id[7049].value ><br>threshold=0.4485483318567276   |
| node_222:<br>feature_name=cg10543634 | feature_id[3775].value ><br>threshold=0.29505227506160736  |
| node_224:<br>feature_name=cg07344990 | feature_id[2926].value ><br>threshold=0.5750180780887604   |
| node_226:<br>feature_name=cg10558233 | feature_id[3780].value <=<br>threshold=0.7217690348625183  |
| node_227:<br>feature_name=cg08097359 | feature_id[3116].value ><br>threshold=0.3598180413246155   |
| node_229:<br>feature_name=cg22737001 | feature_id[6843].value <=<br>threshold=0.46281898021698    |
| node_230:<br>feature_name=cg24276624 | feature_id[7242].value ><br>threshold=0.6169979274272919   |
| node_232:<br>feature_name=cg04026354 | feature_id[1982].value <=<br>threshold=0.42332448065280914 |
| node_233:<br>feature_name=cg06038180 | feature_id[2529].value ><br>threshold=0.6430551409721375   |
| node_235:<br>feature_name=cg14104252 | feature_id[4735].value <=<br>threshold=0.5213949382305145  |
| node_236:<br>feature_name=cg12163781 | feature_id[4197].value <=<br>threshold=0.6278624832630157  |
| Class: osteoblastoma (OB)            |                                                            |
|                                      |                                                            |
| Rules_124                            | passed counts:1                                            |
| node_0:<br>feature_name=cg11915444   | feature_id[4116].value ><br>threshold=0.3402601182460785   |
| node_10:<br>feature_name=cg12109728  | feature_id[4182].value ><br>threshold=0.7068270146846771   |
| node_20:<br>feature_name=cg10844382  | feature_id[3856].value ><br>threshold=0.5988894104957581   |
| node_24:<br>feature_name=cg00631702  | feature_id[943].value <=<br>threshold=0.37470583617687225  |
| node_25:<br>feature_name=cg07912144  | feature_id[3075].value ><br>threshold=0.5578519105911255   |
| node_29:<br>feature_name=cg24407065  | feature_id[388].value ><br>threshold=0.5364363789558411    |

|                                      |                                                            |
|--------------------------------------|------------------------------------------------------------|
| node_33:<br>feature_name=cg15275017  | feature_id[5069].value ><br>threshold=0.4538573920726776   |
| node_51:<br>feature_name=cg07281938  | feature_id[351].value ><br>threshold=0.7506992518901825    |
| node_73:<br>feature_name=cg17524821  | feature_id[5626].value ><br>threshold=0.4504699558019638   |
| node_75:<br>feature_name=cg02973735  | feature_id[1677].value ><br>threshold=0.29383400082588196  |
| node_77:<br>feature_name=cg23345038  | feature_id[7002].value ><br>threshold=0.6255057156085968   |
| node_79:<br>feature_name=cg17537493  | feature_id[5630].value ><br>threshold=0.5825372636318207   |
| node_85:<br>feature_name=cg12948116  | feature_id[4375].value <=<br>threshold=0.5658791363239288  |
| node_86:<br>feature_name=cg06038180  | feature_id[2529].value ><br>threshold=0.43877437710762024  |
| node_88:<br>feature_name=cg15720017  | feature_id[5175].value ><br>threshold=0.7009969055652618   |
| node_90:<br>feature_name=cg13070215  | feature_id[314].value <=<br>threshold=0.14645694941282272  |
| node_91:<br>feature_name=cg01014262  | feature_id[1082].value <=<br>threshold=0.5737917125225067  |
| node_92:<br>feature_name=cg16863382  | feature_id[5471].value ><br>threshold=0.7200668156147003   |
| node_102:<br>feature_name=cg06633739 | feature_id[2686].value ><br>threshold=0.47115950286388397  |
| node_126:<br>feature_name=cg22946562 | feature_id[744].value ><br>threshold=0.6194809079170227    |
| node_170:<br>feature_name=cg12120430 | feature_id[4185].value ><br>threshold=0.5775820016860962   |
| node_172:<br>feature_name=cg02137970 | feature_id[1411].value ><br>threshold=0.6705857813358307   |
| node_196:<br>feature_name=cg03393445 | feature_id[1807].value ><br>threshold=0.4260125905275345   |
| node_218:<br>feature_name=cg23525541 | feature_id[7049].value <=<br>threshold=0.4485483318567276  |
| node_219:<br>feature_name=cg24964215 | feature_id[7404].value <=<br>threshold=0.04320882819592953 |
| Class: osteoblastoma (OB)            |                                                            |
|                                      |                                                            |
| Rules_125                            | passed counts:1                                            |
| node_0:<br>feature_name=cg11915444   | feature_id[4116].value ><br>threshold=0.3402601182460785   |

|                                      |                                                           |
|--------------------------------------|-----------------------------------------------------------|
| node_10:<br>feature_name=cg12109728  | feature_id[4182].value ><br>threshold=0.7068270146846771  |
| node_20:<br>feature_name=cg10844382  | feature_id[3856].value ><br>threshold=0.5988894104957581  |
| node_24:<br>feature_name=cg00631702  | feature_id[943].value <=<br>threshold=0.37470583617687225 |
| node_25:<br>feature_name=cg07912144  | feature_id[3075].value ><br>threshold=0.5578519105911255  |
| node_29:<br>feature_name=cg24407065  | feature_id[388].value ><br>threshold=0.5364363789558411   |
| node_33:<br>feature_name=cg15275017  | feature_id[5069].value ><br>threshold=0.4538573920726776  |
| node_51:<br>feature_name=cg07281938  | feature_id[351].value ><br>threshold=0.7506992518901825   |
| node_73:<br>feature_name=cg17524821  | feature_id[5626].value ><br>threshold=0.4504699558019638  |
| node_75:<br>feature_name=cg02973735  | feature_id[1677].value ><br>threshold=0.29383400082588196 |
| node_77:<br>feature_name=cg23345038  | feature_id[7002].value ><br>threshold=0.6255057156085968  |
| node_79:<br>feature_name=cg17537493  | feature_id[5630].value ><br>threshold=0.5825372636318207  |
| node_85:<br>feature_name=cg12948116  | feature_id[4375].value <=<br>threshold=0.5658791363239288 |
| node_86:<br>feature_name=cg06038180  | feature_id[2529].value ><br>threshold=0.43877437710762024 |
| node_88:<br>feature_name=cg15720017  | feature_id[5175].value ><br>threshold=0.7009969055652618  |
| node_90:<br>feature_name=cg13070215  | feature_id[314].value <=<br>threshold=0.14645694941282272 |
| node_91:<br>feature_name=cg01014262  | feature_id[1082].value <=<br>threshold=0.5737917125225067 |
| node_92:<br>feature_name=cg16863382  | feature_id[5471].value ><br>threshold=0.7200668156147003  |
| node_102:<br>feature_name=cg06633739 | feature_id[2686].value ><br>threshold=0.47115950286388397 |
| node_126:<br>feature_name=cg22946562 | feature_id[744].value ><br>threshold=0.6194809079170227   |
| node_170:<br>feature_name=cg12120430 | feature_id[4185].value ><br>threshold=0.5775820016860962  |
| node_172:<br>feature_name=cg02137970 | feature_id[1411].value ><br>threshold=0.6705857813358307  |
| node_196:<br>feature_name=cg03393445 | feature_id[1807].value <=<br>threshold=0.4260125905275345 |



|                                                   |                                                           |
|---------------------------------------------------|-----------------------------------------------------------|
| node_197:<br>feature_name=cg01297744              | feature_id[1157].value ><br>threshold=0.8005762100219727  |
| node_211:<br>feature_name=cg14401746              | feature_id[4834].value ><br>threshold=0.3708716481924057  |
| node_213:<br>feature_name=cg22060153              | feature_id[6700].value <=<br>threshold=0.7927507758140564 |
| node_214:<br>feature_name=cg06862949              | feature_id[2759].value ><br>threshold=0.7899251878261566  |
| Class: extraskeletal myxoid chondrosarcoma (EMCS) |                                                           |
|                                                   |                                                           |
| Rules_126                                         | passed counts:1                                           |
| node_0:<br>feature_name=cg11915444                | feature_id[4116].value ><br>threshold=0.3402601182460785  |
| node_10:<br>feature_name=cg12109728               | feature_id[4182].value ><br>threshold=0.7068270146846771  |
| node_20:<br>feature_name=cg10844382               | feature_id[3856].value ><br>threshold=0.5988894104957581  |
| node_24:<br>feature_name=cg00631702               | feature_id[943].value <=<br>threshold=0.37470583617687225 |
| node_25:<br>feature_name=cg07912144               | feature_id[3075].value ><br>threshold=0.5578519105911255  |
| node_29:<br>feature_name=cg24407065               | feature_id[388].value ><br>threshold=0.5364363789558411   |
| node_33:<br>feature_name=cg15275017               | feature_id[5069].value ><br>threshold=0.4538573920726776  |
| node_51:<br>feature_name=cg07281938               | feature_id[351].value ><br>threshold=0.7506992518901825   |
| node_73:<br>feature_name=cg17524821               | feature_id[5626].value ><br>threshold=0.4504699558019638  |
| node_75:<br>feature_name=cg02973735               | feature_id[1677].value ><br>threshold=0.29383400082588196 |
| node_77:<br>feature_name=cg23345038               | feature_id[7002].value ><br>threshold=0.6255057156085968  |
| node_79:<br>feature_name=cg17537493               | feature_id[5630].value ><br>threshold=0.5825372636318207  |
| node_85:<br>feature_name=cg12948116               | feature_id[4375].value <=<br>threshold=0.5658791363239288 |
| node_86:<br>feature_name=cg06038180               | feature_id[2529].value ><br>threshold=0.43877437710762024 |
| node_88:<br>feature_name=cg15720017               | feature_id[5175].value ><br>threshold=0.7009969055652618  |
| node_90:<br>feature_name=cg13070215               | feature_id[314].value <=<br>threshold=0.14645694941282272 |

|                                      |                                                           |
|--------------------------------------|-----------------------------------------------------------|
| node_91:<br>feature_name=cg01014262  | feature_id[1082].value <=<br>threshold=0.5737917125225067 |
| node_92:<br>feature_name=cg16863382  | feature_id[5471].value ><br>threshold=0.7200668156147003  |
| node_102:<br>feature_name=cg06633739 | feature_id[2686].value ><br>threshold=0.47115950286388397 |
| node_126:<br>feature_name=cg22946562 | feature_id[744].value ><br>threshold=0.6194809079170227   |
| node_170:<br>feature_name=cg12120430 | feature_id[4185].value ><br>threshold=0.5775820016860962  |
| node_172:<br>feature_name=cg02137970 | feature_id[1411].value ><br>threshold=0.6705857813358307  |
| node_196:<br>feature_name=cg03393445 | feature_id[1807].value <=<br>threshold=0.4260125905275345 |
| node_197:<br>feature_name=cg01297744 | feature_id[1157].value ><br>threshold=0.8005762100219727  |
| node_211:<br>feature_name=cg14401746 | feature_id[4834].value ><br>threshold=0.3708716481924057  |
| node_213:<br>feature_name=cg22060153 | feature_id[6700].value <=<br>threshold=0.7927507758140564 |
| node_214:<br>feature_name=cg06862949 | feature_id[2759].value <=<br>threshold=0.7899251878261566 |
| Class: angiosarcoma (AS)             |                                                           |
|                                      |                                                           |
| Rules_127                            | passed counts:1                                           |
| node_0:<br>feature_name=cg11915444   | feature_id[4116].value ><br>threshold=0.3402601182460785  |
| node_10:<br>feature_name=cg12109728  | feature_id[4182].value ><br>threshold=0.7068270146846771  |
| node_20:<br>feature_name=cg10844382  | feature_id[3856].value ><br>threshold=0.5988894104957581  |
| node_24:<br>feature_name=cg00631702  | feature_id[943].value <=<br>threshold=0.37470583617687225 |
| node_25:<br>feature_name=cg07912144  | feature_id[3075].value ><br>threshold=0.5578519105911255  |
| node_29:<br>feature_name=cg24407065  | feature_id[388].value ><br>threshold=0.5364363789558411   |
| node_33:<br>feature_name=cg15275017  | feature_id[5069].value ><br>threshold=0.4538573920726776  |
| node_51:<br>feature_name=cg07281938  | feature_id[351].value ><br>threshold=0.7506992518901825   |
| node_73:<br>feature_name=cg17524821  | feature_id[5626].value ><br>threshold=0.4504699558019638  |

|                                                                                   |                                                            |
|-----------------------------------------------------------------------------------|------------------------------------------------------------|
| node_75:<br>feature_name=cg02973735                                               | feature_id[1677].value ><br>threshold=0.29383400082588196  |
| node_77:<br>feature_name=cg23345038                                               | feature_id[7002].value ><br>threshold=0.6255057156085968   |
| node_79:<br>feature_name=cg17537493                                               | feature_id[5630].value ><br>threshold=0.5825372636318207   |
| node_85:<br>feature_name=cg12948116                                               | feature_id[4375].value <=<br>threshold=0.5658791363239288  |
| node_86:<br>feature_name=cg06038180                                               | feature_id[2529].value ><br>threshold=0.43877437710762024  |
| node_88:<br>feature_name=cg15720017                                               | feature_id[5175].value ><br>threshold=0.7009969055652618   |
| node_90:<br>feature_name=cg13070215                                               | feature_id[314].value <=<br>threshold=0.14645694941282272  |
| node_91:<br>feature_name=cg01014262                                               | feature_id[1082].value <=<br>threshold=0.5737917125225067  |
| node_92:<br>feature_name=cg16863382                                               | feature_id[5471].value ><br>threshold=0.7200668156147003   |
| node_102:<br>feature_name=cg06633739                                              | feature_id[2686].value ><br>threshold=0.47115950286388397  |
| node_126:<br>feature_name=cg22946562                                              | feature_id[744].value ><br>threshold=0.6194809079170227    |
| node_170:<br>feature_name=cg12120430                                              | feature_id[4185].value ><br>threshold=0.5775820016860962   |
| node_172:<br>feature_name=cg02137970                                              | feature_id[1411].value ><br>threshold=0.6705857813358307   |
| node_196:<br>feature_name=cg03393445                                              | feature_id[1807].value <=<br>threshold=0.4260125905275345  |
| node_197:<br>feature_name=cg01297744                                              | feature_id[1157].value <=<br>threshold=0.8005762100219727  |
| node_198:<br>feature_name=cg08831077                                              | feature_id[3310].value <=<br>threshold=0.4210805594921112  |
| node_199:<br>feature_name=cg11526020                                              | feature_id[4010].value <=<br>threshold=0.8567313253879547  |
| node_200:<br>feature_name=cg02665399                                              | feature_id[1584].value ><br>threshold=0.8073965907096863   |
| node_202:<br>feature_name=cg02364610                                              | feature_id[1491].value ><br>threshold=0.058304985985159874 |
| node_204:<br>feature_name=cg16292933                                              | feature_id[5314].value ><br>threshold=0.6614532470703125   |
| node_206:<br>feature_name=cg14210790                                              | feature_id[4774].value ><br>threshold=0.6849235892295837   |
| Class: well differentiated liposarcoma (WDLs)/dedifferentiated liposarcoma (DDLs) |                                                            |

|                                      |                                                           |
|--------------------------------------|-----------------------------------------------------------|
|                                      |                                                           |
| Rules_128                            | passed counts:1                                           |
| node_0:<br>feature_name=cg11915444   | feature_id[4116].value ><br>threshold=0.3402601182460785  |
| node_10:<br>feature_name=cg12109728  | feature_id[4182].value ><br>threshold=0.7068270146846771  |
| node_20:<br>feature_name=cg10844382  | feature_id[3856].value ><br>threshold=0.5988894104957581  |
| node_24:<br>feature_name=cg00631702  | feature_id[943].value <=<br>threshold=0.37470583617687225 |
| node_25:<br>feature_name=cg07912144  | feature_id[3075].value ><br>threshold=0.5578519105911255  |
| node_29:<br>feature_name=cg24407065  | feature_id[388].value ><br>threshold=0.5364363789558411   |
| node_33:<br>feature_name=cg15275017  | feature_id[5069].value ><br>threshold=0.4538573920726776  |
| node_51:<br>feature_name=cg07281938  | feature_id[351].value ><br>threshold=0.7506992518901825   |
| node_73:<br>feature_name=cg17524821  | feature_id[5626].value ><br>threshold=0.4504699558019638  |
| node_75:<br>feature_name=cg02973735  | feature_id[1677].value ><br>threshold=0.29383400082588196 |
| node_77:<br>feature_name=cg23345038  | feature_id[7002].value ><br>threshold=0.6255057156085968  |
| node_79:<br>feature_name=cg17537493  | feature_id[5630].value ><br>threshold=0.5825372636318207  |
| node_85:<br>feature_name=cg12948116  | feature_id[4375].value <=<br>threshold=0.5658791363239288 |
| node_86:<br>feature_name=cg06038180  | feature_id[2529].value ><br>threshold=0.43877437710762024 |
| node_88:<br>feature_name=cg15720017  | feature_id[5175].value ><br>threshold=0.7009969055652618  |
| node_90:<br>feature_name=cg13070215  | feature_id[314].value <=<br>threshold=0.14645694941282272 |
| node_91:<br>feature_name=cg01014262  | feature_id[1082].value <=<br>threshold=0.5737917125225067 |
| node_92:<br>feature_name=cg16863382  | feature_id[5471].value ><br>threshold=0.7200668156147003  |
| node_102:<br>feature_name=cg06633739 | feature_id[2686].value ><br>threshold=0.47115950286388397 |
| node_126:<br>feature_name=cg22946562 | feature_id[744].value ><br>threshold=0.6194809079170227   |

|                                         |                                                            |
|-----------------------------------------|------------------------------------------------------------|
| node_170:<br>feature_name=cg12120430    | feature_id[4185].value ><br>threshold=0.5775820016860962   |
| node_172:<br>feature_name=cg02137970    | feature_id[1411].value ><br>threshold=0.6705857813358307   |
| node_196:<br>feature_name=cg03393445    | feature_id[1807].value <=<br>threshold=0.4260125905275345  |
| node_197:<br>feature_name=cg01297744    | feature_id[1157].value <=<br>threshold=0.8005762100219727  |
| node_198:<br>feature_name=cg08831077    | feature_id[3310].value <=<br>threshold=0.4210805594921112  |
| node_199:<br>feature_name=cg11526020    | feature_id[4010].value <=<br>threshold=0.8567313253879547  |
| node_200:<br>feature_name=cg02665399    | feature_id[1584].value ><br>threshold=0.8073965907096863   |
| node_202:<br>feature_name=cg02364610    | feature_id[1491].value ><br>threshold=0.058304985985159874 |
| node_204:<br>feature_name=cg16292933    | feature_id[5314].value ><br>threshold=0.6614532470703125   |
| node_206:<br>feature_name=cg14210790    | feature_id[4774].value <=<br>threshold=0.6849235892295837  |
| Class: undifferentiated sarcoma (USARC) |                                                            |
|                                         |                                                            |
| Rules_129                               | passed counts:1                                            |
| node_0:<br>feature_name=cg11915444      | feature_id[4116].value ><br>threshold=0.3402601182460785   |
| node_10:<br>feature_name=cg12109728     | feature_id[4182].value ><br>threshold=0.7068270146846771   |
| node_20:<br>feature_name=cg10844382     | feature_id[3856].value ><br>threshold=0.5988894104957581   |
| node_24:<br>feature_name=cg00631702     | feature_id[943].value <=<br>threshold=0.37470583617687225  |
| node_25:<br>feature_name=cg07912144     | feature_id[3075].value ><br>threshold=0.5578519105911255   |
| node_29:<br>feature_name=cg24407065     | feature_id[388].value ><br>threshold=0.5364363789558411    |
| node_33:<br>feature_name=cg15275017     | feature_id[5069].value ><br>threshold=0.4538573920726776   |
| node_51:<br>feature_name=cg07281938     | feature_id[351].value ><br>threshold=0.7506992518901825    |
| node_73:<br>feature_name=cg17524821     | feature_id[5626].value ><br>threshold=0.4504699558019638   |
| node_75:<br>feature_name=cg02973735     | feature_id[1677].value ><br>threshold=0.29383400082588196  |

|                                             |                                                            |
|---------------------------------------------|------------------------------------------------------------|
| node_77:<br>feature_name=cg23345038         | feature_id[7002].value ><br>threshold=0.6255057156085968   |
| node_79:<br>feature_name=cg17537493         | feature_id[5630].value ><br>threshold=0.5825372636318207   |
| node_85:<br>feature_name=cg12948116         | feature_id[4375].value <=<br>threshold=0.5658791363239288  |
| node_86:<br>feature_name=cg06038180         | feature_id[2529].value ><br>threshold=0.43877437710762024  |
| node_88:<br>feature_name=cg15720017         | feature_id[5175].value ><br>threshold=0.7009969055652618   |
| node_90:<br>feature_name=cg13070215         | feature_id[314].value <=<br>threshold=0.14645694941282272  |
| node_91:<br>feature_name=cg01014262         | feature_id[1082].value <=<br>threshold=0.5737917125225067  |
| node_92:<br>feature_name=cg16863382         | feature_id[5471].value ><br>threshold=0.7200668156147003   |
| node_102:<br>feature_name=cg06633739        | feature_id[2686].value ><br>threshold=0.47115950286388397  |
| node_126:<br>feature_name=cg22946562        | feature_id[744].value ><br>threshold=0.6194809079170227    |
| node_170:<br>feature_name=cg12120430        | feature_id[4185].value ><br>threshold=0.5775820016860962   |
| node_172:<br>feature_name=cg02137970        | feature_id[1411].value ><br>threshold=0.6705857813358307   |
| node_196:<br>feature_name=cg03393445        | feature_id[1807].value <=<br>threshold=0.4260125905275345  |
| node_197:<br>feature_name=cg01297744        | feature_id[1157].value <=<br>threshold=0.8005762100219727  |
| node_198:<br>feature_name=cg08831077        | feature_id[3310].value <=<br>threshold=0.4210805594921112  |
| node_199:<br>feature_name=cg11526020        | feature_id[4010].value <=<br>threshold=0.8567313253879547  |
| node_200:<br>feature_name=cg02665399        | feature_id[1584].value ><br>threshold=0.8073965907096863   |
| node_202:<br>feature_name=cg02364610        | feature_id[1491].value ><br>threshold=0.058304985985159874 |
| node_204:<br>feature_name=cg16292933        | feature_id[5314].value <=<br>threshold=0.6614532470703125  |
| Class: small blue round cell tumour (SBRCT) |                                                            |
|                                             |                                                            |
| Rules_130                                   | passed counts:1                                            |
| node_0:<br>feature_name=cg11915444          | feature_id[4116].value ><br>threshold=0.3402601182460785   |

|                                      |                                                           |
|--------------------------------------|-----------------------------------------------------------|
| node_10:<br>feature_name=cg12109728  | feature_id[4182].value ><br>threshold=0.7068270146846771  |
| node_20:<br>feature_name=cg10844382  | feature_id[3856].value ><br>threshold=0.5988894104957581  |
| node_24:<br>feature_name=cg00631702  | feature_id[943].value <=<br>threshold=0.37470583617687225 |
| node_25:<br>feature_name=cg07912144  | feature_id[3075].value ><br>threshold=0.5578519105911255  |
| node_29:<br>feature_name=cg24407065  | feature_id[388].value ><br>threshold=0.5364363789558411   |
| node_33:<br>feature_name=cg15275017  | feature_id[5069].value ><br>threshold=0.4538573920726776  |
| node_51:<br>feature_name=cg07281938  | feature_id[351].value ><br>threshold=0.7506992518901825   |
| node_73:<br>feature_name=cg17524821  | feature_id[5626].value ><br>threshold=0.4504699558019638  |
| node_75:<br>feature_name=cg02973735  | feature_id[1677].value ><br>threshold=0.29383400082588196 |
| node_77:<br>feature_name=cg23345038  | feature_id[7002].value ><br>threshold=0.6255057156085968  |
| node_79:<br>feature_name=cg17537493  | feature_id[5630].value ><br>threshold=0.5825372636318207  |
| node_85:<br>feature_name=cg12948116  | feature_id[4375].value <=<br>threshold=0.5658791363239288 |
| node_86:<br>feature_name=cg06038180  | feature_id[2529].value ><br>threshold=0.43877437710762024 |
| node_88:<br>feature_name=cg15720017  | feature_id[5175].value ><br>threshold=0.7009969055652618  |
| node_90:<br>feature_name=cg13070215  | feature_id[314].value <=<br>threshold=0.14645694941282272 |
| node_91:<br>feature_name=cg01014262  | feature_id[1082].value <=<br>threshold=0.5737917125225067 |
| node_92:<br>feature_name=cg16863382  | feature_id[5471].value ><br>threshold=0.7200668156147003  |
| node_102:<br>feature_name=cg06633739 | feature_id[2686].value ><br>threshold=0.47115950286388397 |
| node_126:<br>feature_name=cg22946562 | feature_id[744].value ><br>threshold=0.6194809079170227   |
| node_170:<br>feature_name=cg12120430 | feature_id[4185].value ><br>threshold=0.5775820016860962  |
| node_172:<br>feature_name=cg02137970 | feature_id[1411].value ><br>threshold=0.6705857813358307  |
| node_196:<br>feature_name=cg03393445 | feature_id[1807].value <=<br>threshold=0.4260125905275345 |

|                                               |                                                             |
|-----------------------------------------------|-------------------------------------------------------------|
| node_197:<br>feature_name=cg01297744          | feature_id[1157].value <=<br>threshold=0.8005762100219727   |
| node_198:<br>feature_name=cg08831077          | feature_id[3310].value <=<br>threshold=0.4210805594921112   |
| node_199:<br>feature_name=cg11526020          | feature_id[4010].value <=<br>threshold=0.8567313253879547   |
| node_200:<br>feature_name=cg02665399          | feature_id[1584].value ><br>threshold=0.8073965907096863    |
| node_202:<br>feature_name=cg02364610          | feature_id[1491].value <=<br>threshold=0.058304985985159874 |
| Class: mesenchymal chondrosarcoma (CSA (MES)) |                                                             |
|                                               |                                                             |
| Rules_131                                     | passed counts:1                                             |
| node_0:<br>feature_name=cg11915444            | feature_id[4116].value ><br>threshold=0.3402601182460785    |
| node_10:<br>feature_name=cg12109728           | feature_id[4182].value ><br>threshold=0.7068270146846771    |
| node_20:<br>feature_name=cg10844382           | feature_id[3856].value ><br>threshold=0.5988894104957581    |
| node_24:<br>feature_name=cg00631702           | feature_id[943].value <=<br>threshold=0.37470583617687225   |
| node_25:<br>feature_name=cg07912144           | feature_id[3075].value ><br>threshold=0.5578519105911255    |
| node_29:<br>feature_name=cg24407065           | feature_id[388].value ><br>threshold=0.5364363789558411     |
| node_33:<br>feature_name=cg15275017           | feature_id[5069].value ><br>threshold=0.4538573920726776    |
| node_51:<br>feature_name=cg07281938           | feature_id[351].value ><br>threshold=0.7506992518901825     |
| node_73:<br>feature_name=cg17524821           | feature_id[5626].value ><br>threshold=0.4504699558019638    |
| node_75:<br>feature_name=cg02973735           | feature_id[1677].value ><br>threshold=0.29383400082588196   |
| node_77:<br>feature_name=cg23345038           | feature_id[7002].value ><br>threshold=0.6255057156085968    |
| node_79:<br>feature_name=cg17537493           | feature_id[5630].value ><br>threshold=0.5825372636318207    |
| node_85:<br>feature_name=cg12948116           | feature_id[4375].value <=<br>threshold=0.5658791363239288   |
| node_86:<br>feature_name=cg06038180           | feature_id[2529].value ><br>threshold=0.43877437710762024   |
| node_88:<br>feature_name=cg15720017           | feature_id[5175].value ><br>threshold=0.7009969055652618    |



|                                      |                                                           |
|--------------------------------------|-----------------------------------------------------------|
| node_90:<br>feature_name=cg13070215  | feature_id[314].value <=<br>threshold=0.14645694941282272 |
| node_91:<br>feature_name=cg01014262  | feature_id[1082].value <=<br>threshold=0.5737917125225067 |
| node_92:<br>feature_name=cg16863382  | feature_id[5471].value ><br>threshold=0.7200668156147003  |
| node_102:<br>feature_name=cg06633739 | feature_id[2686].value ><br>threshold=0.47115950286388397 |
| node_126:<br>feature_name=cg22946562 | feature_id[744].value ><br>threshold=0.6194809079170227   |
| node_170:<br>feature_name=cg12120430 | feature_id[4185].value ><br>threshold=0.5775820016860962  |
| node_172:<br>feature_name=cg02137970 | feature_id[1411].value ><br>threshold=0.6705857813358307  |
| node_196:<br>feature_name=cg03393445 | feature_id[1807].value <=<br>threshold=0.4260125905275345 |
| node_197:<br>feature_name=cg01297744 | feature_id[1157].value <=<br>threshold=0.8005762100219727 |
| node_198:<br>feature_name=cg08831077 | feature_id[3310].value <=<br>threshold=0.4210805594921112 |
| node_199:<br>feature_name=cg11526020 | feature_id[4010].value <=<br>threshold=0.8567313253879547 |
| node_200:<br>feature_name=cg02665399 | feature_id[1584].value <=<br>threshold=0.8073965907096863 |
| Class: Ewing sarcoma (EWING)         |                                                           |
|                                      |                                                           |
| Rules_132                            | passed counts:1                                           |
| node_0:<br>feature_name=cg11915444   | feature_id[4116].value ><br>threshold=0.3402601182460785  |
| node_10:<br>feature_name=cg12109728  | feature_id[4182].value ><br>threshold=0.7068270146846771  |
| node_20:<br>feature_name=cg10844382  | feature_id[3856].value ><br>threshold=0.5988894104957581  |
| node_24:<br>feature_name=cg00631702  | feature_id[943].value <=<br>threshold=0.37470583617687225 |
| node_25:<br>feature_name=cg07912144  | feature_id[3075].value ><br>threshold=0.5578519105911255  |
| node_29:<br>feature_name=cg24407065  | feature_id[388].value ><br>threshold=0.5364363789558411   |
| node_33:<br>feature_name=cg15275017  | feature_id[5069].value ><br>threshold=0.4538573920726776  |
| node_51:<br>feature_name=cg07281938  | feature_id[351].value ><br>threshold=0.7506992518901825   |

|                                                  |                                                           |
|--------------------------------------------------|-----------------------------------------------------------|
| node_73:<br>feature_name=cg17524821              | feature_id[5626].value ><br>threshold=0.4504699558019638  |
| node_75:<br>feature_name=cg02973735              | feature_id[1677].value ><br>threshold=0.29383400082588196 |
| node_77:<br>feature_name=cg23345038              | feature_id[7002].value ><br>threshold=0.6255057156085968  |
| node_79:<br>feature_name=cg17537493              | feature_id[5630].value ><br>threshold=0.5825372636318207  |
| node_85:<br>feature_name=cg12948116              | feature_id[4375].value <=<br>threshold=0.5658791363239288 |
| node_86:<br>feature_name=cg06038180              | feature_id[2529].value ><br>threshold=0.43877437710762024 |
| node_88:<br>feature_name=cg15720017              | feature_id[5175].value ><br>threshold=0.7009969055652618  |
| node_90:<br>feature_name=cg13070215              | feature_id[314].value <=<br>threshold=0.14645694941282272 |
| node_91:<br>feature_name=cg01014262              | feature_id[1082].value <=<br>threshold=0.5737917125225067 |
| node_92:<br>feature_name=cg16863382              | feature_id[5471].value ><br>threshold=0.7200668156147003  |
| node_102:<br>feature_name=cg06633739             | feature_id[2686].value ><br>threshold=0.47115950286388397 |
| node_126:<br>feature_name=cg22946562             | feature_id[744].value ><br>threshold=0.6194809079170227   |
| node_170:<br>feature_name=cg12120430             | feature_id[4185].value ><br>threshold=0.5775820016860962  |
| node_172:<br>feature_name=cg02137970             | feature_id[1411].value <=<br>threshold=0.6705857813358307 |
| node_173:<br>feature_name=cg16185457             | feature_id[5282].value ><br>threshold=0.5055856853723526  |
| node_183:<br>feature_name=cg04993279             | feature_id[2243].value ><br>threshold=0.46021124720573425 |
| node_191:<br>feature_name=cg09043524             | feature_id[3372].value <=<br>threshold=0.7900851368904114 |
| node_192:<br>feature_name=cg06422467             | feature_id[2625].value ><br>threshold=0.22639098018407822 |
| Class: inflammatory myofibroblastic tumour (IMT) |                                                           |
|                                                  |                                                           |
| Rules_133                                        | passed counts:1                                           |
| node_0:<br>feature_name=cg11915444               | feature_id[4116].value ><br>threshold=0.3402601182460785  |
| node_10:<br>feature_name=cg12109728              | feature_id[4182].value ><br>threshold=0.7068270146846771  |

|                                      |                                                           |
|--------------------------------------|-----------------------------------------------------------|
| node_20:<br>feature_name=cg10844382  | feature_id[3856].value ><br>threshold=0.5988894104957581  |
| node_24:<br>feature_name=cg00631702  | feature_id[943].value <=<br>threshold=0.37470583617687225 |
| node_25:<br>feature_name=cg07912144  | feature_id[3075].value ><br>threshold=0.5578519105911255  |
| node_29:<br>feature_name=cg24407065  | feature_id[388].value ><br>threshold=0.5364363789558411   |
| node_33:<br>feature_name=cg15275017  | feature_id[5069].value ><br>threshold=0.4538573920726776  |
| node_51:<br>feature_name=cg07281938  | feature_id[351].value ><br>threshold=0.7506992518901825   |
| node_73:<br>feature_name=cg17524821  | feature_id[5626].value ><br>threshold=0.4504699558019638  |
| node_75:<br>feature_name=cg02973735  | feature_id[1677].value ><br>threshold=0.29383400082588196 |
| node_77:<br>feature_name=cg23345038  | feature_id[7002].value ><br>threshold=0.6255057156085968  |
| node_79:<br>feature_name=cg17537493  | feature_id[5630].value ><br>threshold=0.5825372636318207  |
| node_85:<br>feature_name=cg12948116  | feature_id[4375].value <=<br>threshold=0.5658791363239288 |
| node_86:<br>feature_name=cg06038180  | feature_id[2529].value ><br>threshold=0.43877437710762024 |
| node_88:<br>feature_name=cg15720017  | feature_id[5175].value ><br>threshold=0.7009969055652618  |
| node_90:<br>feature_name=cg13070215  | feature_id[314].value <=<br>threshold=0.14645694941282272 |
| node_91:<br>feature_name=cg01014262  | feature_id[1082].value <=<br>threshold=0.5737917125225067 |
| node_92:<br>feature_name=cg16863382  | feature_id[5471].value ><br>threshold=0.7200668156147003  |
| node_102:<br>feature_name=cg06633739 | feature_id[2686].value ><br>threshold=0.47115950286388397 |
| node_126:<br>feature_name=cg22946562 | feature_id[744].value ><br>threshold=0.6194809079170227   |
| node_170:<br>feature_name=cg12120430 | feature_id[4185].value ><br>threshold=0.5775820016860962  |
| node_172:<br>feature_name=cg02137970 | feature_id[1411].value <=<br>threshold=0.6705857813358307 |
| node_173:<br>feature_name=cg16185457 | feature_id[5282].value ><br>threshold=0.5055856853723526  |
| node_183:<br>feature_name=cg04993279 | feature_id[2243].value ><br>threshold=0.46021124720573425 |

|                                      |                                                            |
|--------------------------------------|------------------------------------------------------------|
| node_191:<br>feature_name=cg09043524 | feature_id[3372].value <=<br>threshold=0.7900851368904114  |
| node_192:<br>feature_name=cg06422467 | feature_id[2625].value <=<br>threshold=0.22639098018407822 |
| Class: sarcoma (SARC)                |                                                            |
|                                      |                                                            |
| Rules_134                            | passed counts:1                                            |
| node_0:<br>feature_name=cg11915444   | feature_id[4116].value ><br>threshold=0.3402601182460785   |
| node_10:<br>feature_name=cg12109728  | feature_id[4182].value ><br>threshold=0.7068270146846771   |
| node_20:<br>feature_name=cg10844382  | feature_id[3856].value ><br>threshold=0.5988894104957581   |
| node_24:<br>feature_name=cg00631702  | feature_id[943].value <=<br>threshold=0.37470583617687225  |
| node_25:<br>feature_name=cg07912144  | feature_id[3075].value ><br>threshold=0.5578519105911255   |
| node_29:<br>feature_name=cg24407065  | feature_id[388].value ><br>threshold=0.5364363789558411    |
| node_33:<br>feature_name=cg15275017  | feature_id[5069].value ><br>threshold=0.4538573920726776   |
| node_51:<br>feature_name=cg07281938  | feature_id[351].value ><br>threshold=0.7506992518901825    |
| node_73:<br>feature_name=cg17524821  | feature_id[5626].value ><br>threshold=0.4504699558019638   |
| node_75:<br>feature_name=cg02973735  | feature_id[1677].value ><br>threshold=0.29383400082588196  |
| node_77:<br>feature_name=cg23345038  | feature_id[7002].value ><br>threshold=0.6255057156085968   |
| node_79:<br>feature_name=cg17537493  | feature_id[5630].value ><br>threshold=0.5825372636318207   |
| node_85:<br>feature_name=cg12948116  | feature_id[4375].value <=<br>threshold=0.5658791363239288  |
| node_86:<br>feature_name=cg06038180  | feature_id[2529].value ><br>threshold=0.43877437710762024  |
| node_88:<br>feature_name=cg15720017  | feature_id[5175].value ><br>threshold=0.7009969055652618   |
| node_90:<br>feature_name=cg13070215  | feature_id[314].value <=<br>threshold=0.14645694941282272  |
| node_91:<br>feature_name=cg01014262  | feature_id[1082].value <=<br>threshold=0.5737917125225067  |
| node_92:<br>feature_name=cg16863382  | feature_id[5471].value ><br>threshold=0.7200668156147003   |

|                                      |                                                            |
|--------------------------------------|------------------------------------------------------------|
| node_102:<br>feature_name=cg06633739 | feature_id[2686].value ><br>threshold=0.47115950286388397  |
| node_126:<br>feature_name=cg22946562 | feature_id[744].value ><br>threshold=0.6194809079170227    |
| node_170:<br>feature_name=cg12120430 | feature_id[4185].value ><br>threshold=0.5775820016860962   |
| node_172:<br>feature_name=cg02137970 | feature_id[1411].value <=<br>threshold=0.6705857813358307  |
| node_173:<br>feature_name=cg16185457 | feature_id[5282].value ><br>threshold=0.5055856853723526   |
| node_183:<br>feature_name=cg04993279 | feature_id[2243].value <=<br>threshold=0.46021124720573425 |
| node_184:<br>feature_name=cg04655520 | feature_id[2141].value <=<br>threshold=0.08191334456205368 |
| node_185:<br>feature_name=cg11103999 | feature_id[3923].value ><br>threshold=0.8651433885097504   |
| node_187:<br>feature_name=cg00044665 | feature_id[769].value ><br>threshold=0.4028041586279869    |
| Class: leiomyosarcoma (LMS)          |                                                            |
|                                      |                                                            |
| Rules_135                            | passed counts:1                                            |
| node_0:<br>feature_name=cg11915444   | feature_id[4116].value ><br>threshold=0.3402601182460785   |
| node_10:<br>feature_name=cg12109728  | feature_id[4182].value ><br>threshold=0.7068270146846771   |
| node_20:<br>feature_name=cg10844382  | feature_id[3856].value ><br>threshold=0.5988894104957581   |
| node_24:<br>feature_name=cg00631702  | feature_id[943].value <=<br>threshold=0.37470583617687225  |
| node_25:<br>feature_name=cg07912144  | feature_id[3075].value ><br>threshold=0.5578519105911255   |
| node_29:<br>feature_name=cg24407065  | feature_id[388].value ><br>threshold=0.5364363789558411    |
| node_33:<br>feature_name=cg15275017  | feature_id[5069].value ><br>threshold=0.4538573920726776   |
| node_51:<br>feature_name=cg07281938  | feature_id[351].value ><br>threshold=0.7506992518901825    |
| node_73:<br>feature_name=cg17524821  | feature_id[5626].value ><br>threshold=0.4504699558019638   |
| node_75:<br>feature_name=cg02973735  | feature_id[1677].value ><br>threshold=0.29383400082588196  |
| node_77:<br>feature_name=cg23345038  | feature_id[7002].value ><br>threshold=0.6255057156085968   |

|                                                          |                                                            |
|----------------------------------------------------------|------------------------------------------------------------|
| node_79:<br>feature_name=cg17537493                      | feature_id[5630].value ><br>threshold=0.5825372636318207   |
| node_85:<br>feature_name=cg12948116                      | feature_id[4375].value <=<br>threshold=0.5658791363239288  |
| node_86:<br>feature_name=cg06038180                      | feature_id[2529].value ><br>threshold=0.43877437710762024  |
| node_88:<br>feature_name=cg15720017                      | feature_id[5175].value ><br>threshold=0.7009969055652618   |
| node_90:<br>feature_name=cg13070215                      | feature_id[314].value <=<br>threshold=0.14645694941282272  |
| node_91:<br>feature_name=cg01014262                      | feature_id[1082].value <=<br>threshold=0.5737917125225067  |
| node_92:<br>feature_name=cg16863382                      | feature_id[5471].value ><br>threshold=0.7200668156147003   |
| node_102:<br>feature_name=cg06633739                     | feature_id[2686].value ><br>threshold=0.47115950286388397  |
| node_126:<br>feature_name=cg22946562                     | feature_id[744].value ><br>threshold=0.6194809079170227    |
| node_170:<br>feature_name=cg12120430                     | feature_id[4185].value ><br>threshold=0.5775820016860962   |
| node_172:<br>feature_name=cg02137970                     | feature_id[1411].value <=<br>threshold=0.6705857813358307  |
| node_173:<br>feature_name=cg16185457                     | feature_id[5282].value ><br>threshold=0.5055856853723526   |
| node_183:<br>feature_name=cg04993279                     | feature_id[2243].value <=<br>threshold=0.46021124720573425 |
| node_184:<br>feature_name=cg04655520                     | feature_id[2141].value <=<br>threshold=0.08191334456205368 |
| node_185:<br>feature_name=cg11103999                     | feature_id[3923].value ><br>threshold=0.8651433885097504   |
| node_187:<br>feature_name=cg00044665                     | feature_id[769].value <=<br>threshold=0.4028041586279869   |
| Class: high-grade endometrial stromal sarcoma (ESS (HG)) |                                                            |
|                                                          |                                                            |
| Rules_136                                                | passed counts:1                                            |
| node_0:<br>feature_name=cg11915444                       | feature_id[4116].value ><br>threshold=0.3402601182460785   |
| node_10:<br>feature_name=cg12109728                      | feature_id[4182].value ><br>threshold=0.7068270146846771   |
| node_20:<br>feature_name=cg10844382                      | feature_id[3856].value ><br>threshold=0.5988894104957581   |
| node_24:<br>feature_name=cg00631702                      | feature_id[943].value <=<br>threshold=0.37470583617687225  |

|                                      |                                                            |
|--------------------------------------|------------------------------------------------------------|
| node_25:<br>feature_name=cg07912144  | feature_id[3075].value ><br>threshold=0.5578519105911255   |
| node_29:<br>feature_name=cg24407065  | feature_id[388].value ><br>threshold=0.5364363789558411    |
| node_33:<br>feature_name=cg15275017  | feature_id[5069].value ><br>threshold=0.4538573920726776   |
| node_51:<br>feature_name=cg07281938  | feature_id[351].value ><br>threshold=0.7506992518901825    |
| node_73:<br>feature_name=cg17524821  | feature_id[5626].value ><br>threshold=0.4504699558019638   |
| node_75:<br>feature_name=cg02973735  | feature_id[1677].value ><br>threshold=0.29383400082588196  |
| node_77:<br>feature_name=cg23345038  | feature_id[7002].value ><br>threshold=0.6255057156085968   |
| node_79:<br>feature_name=cg17537493  | feature_id[5630].value ><br>threshold=0.5825372636318207   |
| node_85:<br>feature_name=cg12948116  | feature_id[4375].value <=<br>threshold=0.5658791363239288  |
| node_86:<br>feature_name=cg06038180  | feature_id[2529].value ><br>threshold=0.43877437710762024  |
| node_88:<br>feature_name=cg15720017  | feature_id[5175].value ><br>threshold=0.7009969055652618   |
| node_90:<br>feature_name=cg13070215  | feature_id[314].value <=<br>threshold=0.14645694941282272  |
| node_91:<br>feature_name=cg01014262  | feature_id[1082].value <=<br>threshold=0.5737917125225067  |
| node_92:<br>feature_name=cg16863382  | feature_id[5471].value ><br>threshold=0.7200668156147003   |
| node_102:<br>feature_name=cg06633739 | feature_id[2686].value ><br>threshold=0.47115950286388397  |
| node_126:<br>feature_name=cg22946562 | feature_id[744].value ><br>threshold=0.6194809079170227    |
| node_170:<br>feature_name=cg12120430 | feature_id[4185].value ><br>threshold=0.5775820016860962   |
| node_172:<br>feature_name=cg02137970 | feature_id[1411].value <=<br>threshold=0.6705857813358307  |
| node_173:<br>feature_name=cg16185457 | feature_id[5282].value <=<br>threshold=0.5055856853723526  |
| node_174:<br>feature_name=cg09040552 | feature_id[3370].value ><br>threshold=0.596051037311554    |
| node_176:<br>feature_name=cg12064373 | feature_id[4162].value <=<br>threshold=0.10608945414423943 |
| node_177:<br>feature_name=cg04874782 | feature_id[2203].value <=<br>threshold=0.24745557457208633 |

|                                                         |                                                           |
|---------------------------------------------------------|-----------------------------------------------------------|
| node_178:<br>feature_name=cg10963218                    | feature_id[3883].value ><br>threshold=0.6643033921718597  |
| Class: malignant peripheral nerve sheath tumour (MPNST) |                                                           |
| Rules_137                                               | passed counts:1                                           |
| node_0:<br>feature_name=cg11915444                      | feature_id[4116].value ><br>threshold=0.3402601182460785  |
| node_10:<br>feature_name=cg12109728                     | feature_id[4182].value ><br>threshold=0.7068270146846771  |
| node_20:<br>feature_name=cg10844382                     | feature_id[3856].value ><br>threshold=0.5988894104957581  |
| node_24:<br>feature_name=cg00631702                     | feature_id[943].value <=<br>threshold=0.37470583617687225 |
| node_25:<br>feature_name=cg07912144                     | feature_id[3075].value ><br>threshold=0.5578519105911255  |
| node_29:<br>feature_name=cg24407065                     | feature_id[388].value ><br>threshold=0.5364363789558411   |
| node_33:<br>feature_name=cg15275017                     | feature_id[5069].value ><br>threshold=0.4538573920726776  |
| node_51:<br>feature_name=cg07281938                     | feature_id[351].value ><br>threshold=0.7506992518901825   |
| node_73:<br>feature_name=cg17524821                     | feature_id[5626].value ><br>threshold=0.4504699558019638  |
| node_75:<br>feature_name=cg02973735                     | feature_id[1677].value ><br>threshold=0.29383400082588196 |
| node_77:<br>feature_name=cg23345038                     | feature_id[7002].value ><br>threshold=0.6255057156085968  |
| node_79:<br>feature_name=cg17537493                     | feature_id[5630].value ><br>threshold=0.5825372636318207  |
| node_85:<br>feature_name=cg12948116                     | feature_id[4375].value <=<br>threshold=0.5658791363239288 |
| node_86:<br>feature_name=cg06038180                     | feature_id[2529].value ><br>threshold=0.43877437710762024 |
| node_88:<br>feature_name=cg15720017                     | feature_id[5175].value ><br>threshold=0.7009969055652618  |
| node_90:<br>feature_name=cg13070215                     | feature_id[314].value <=<br>threshold=0.14645694941282272 |
| node_91:<br>feature_name=cg01014262                     | feature_id[1082].value <=<br>threshold=0.5737917125225067 |
| node_92:<br>feature_name=cg16863382                     | feature_id[5471].value ><br>threshold=0.7200668156147003  |
| node_102:<br>feature_name=cg06633739                    | feature_id[2686].value ><br>threshold=0.47115950286388397 |



|                                         |                                                           |
|-----------------------------------------|-----------------------------------------------------------|
| node_126:<br>feature_name=cg22946562    | feature_id[744].value <=<br>threshold=0.6194809079170227  |
| node_127:<br>feature_name=cg23920016    | feature_id[7139].value ><br>threshold=0.7449243068695068  |
| node_151:<br>feature_name=cg21617218    | feature_id[6608].value ><br>threshold=0.8795748353004456  |
| node_153:<br>feature_name=cg01663970    | feature_id[1273].value ><br>threshold=0.8442256152629852  |
| node_155:<br>feature_name=cg00686915    | feature_id[965].value ><br>threshold=0.20000632852315903  |
| node_157:<br>feature_name=cg11628781    | feature_id[4033].value <=<br>threshold=0.9032271206378937 |
| node_158:<br>feature_name=cg20173014    | feature_id[6271].value ><br>threshold=0.8712336122989655  |
| node_160:<br>feature_name=cg04961225    | feature_id[2231].value ><br>threshold=0.6663023084402084  |
| node_162:<br>feature_name=cg14340089    | feature_id[4825].value ><br>threshold=0.6815699338912964  |
| node_164:<br>feature_name=cg04576568    | feature_id[2126].value ><br>threshold=0.5339387804269791  |
| node_166:<br>feature_name=cg25650076    | feature_id[389].value ><br>threshold=0.45621342677623034  |
| Class: giant cell tumour of bone (GCTB) |                                                           |
|                                         |                                                           |
| Rules_138                               | passed counts:1                                           |
| node_0:<br>feature_name=cg11915444      | feature_id[4116].value ><br>threshold=0.3402601182460785  |
| node_10:<br>feature_name=cg12109728     | feature_id[4182].value ><br>threshold=0.7068270146846771  |
| node_20:<br>feature_name=cg10844382     | feature_id[3856].value ><br>threshold=0.5988894104957581  |
| node_24:<br>feature_name=cg00631702     | feature_id[943].value <=<br>threshold=0.37470583617687225 |
| node_25:<br>feature_name=cg07912144     | feature_id[3075].value ><br>threshold=0.5578519105911255  |
| node_29:<br>feature_name=cg24407065     | feature_id[388].value ><br>threshold=0.5364363789558411   |
| node_33:<br>feature_name=cg15275017     | feature_id[5069].value ><br>threshold=0.4538573920726776  |
| node_51:<br>feature_name=cg07281938     | feature_id[351].value ><br>threshold=0.7506992518901825   |
| node_73:<br>feature_name=cg17524821     | feature_id[5626].value ><br>threshold=0.4504699558019638  |

|                                      |                                                           |
|--------------------------------------|-----------------------------------------------------------|
| node_75:<br>feature_name=cg02973735  | feature_id[1677].value ><br>threshold=0.29383400082588196 |
| node_77:<br>feature_name=cg23345038  | feature_id[7002].value ><br>threshold=0.6255057156085968  |
| node_79:<br>feature_name=cg17537493  | feature_id[5630].value ><br>threshold=0.5825372636318207  |
| node_85:<br>feature_name=cg12948116  | feature_id[4375].value <=<br>threshold=0.5658791363239288 |
| node_86:<br>feature_name=cg06038180  | feature_id[2529].value ><br>threshold=0.43877437710762024 |
| node_88:<br>feature_name=cg15720017  | feature_id[5175].value ><br>threshold=0.7009969055652618  |
| node_90:<br>feature_name=cg13070215  | feature_id[314].value <=<br>threshold=0.14645694941282272 |
| node_91:<br>feature_name=cg01014262  | feature_id[1082].value <=<br>threshold=0.5737917125225067 |
| node_92:<br>feature_name=cg16863382  | feature_id[5471].value ><br>threshold=0.7200668156147003  |
| node_102:<br>feature_name=cg06633739 | feature_id[2686].value ><br>threshold=0.47115950286388397 |
| node_126:<br>feature_name=cg22946562 | feature_id[744].value <=<br>threshold=0.6194809079170227  |
| node_127:<br>feature_name=cg23920016 | feature_id[7139].value ><br>threshold=0.7449243068695068  |
| node_151:<br>feature_name=cg21617218 | feature_id[6608].value ><br>threshold=0.8795748353004456  |
| node_153:<br>feature_name=cg01663970 | feature_id[1273].value ><br>threshold=0.8442256152629852  |
| node_155:<br>feature_name=cg00686915 | feature_id[965].value ><br>threshold=0.20000632852315903  |
| node_157:<br>feature_name=cg11628781 | feature_id[4033].value <=<br>threshold=0.9032271206378937 |
| node_158:<br>feature_name=cg20173014 | feature_id[6271].value ><br>threshold=0.8712336122989655  |
| node_160:<br>feature_name=cg04961225 | feature_id[2231].value ><br>threshold=0.6663023084402084  |
| node_162:<br>feature_name=cg14340089 | feature_id[4825].value ><br>threshold=0.6815699338912964  |
| node_164:<br>feature_name=cg04576568 | feature_id[2126].value ><br>threshold=0.5339387804269791  |
| node_166:<br>feature_name=cg25650076 | feature_id[389].value <=<br>threshold=0.45621342677623034 |
| Class: leiomyosarcoma (LMS)          |                                                           |

|                                      |                                                           |
|--------------------------------------|-----------------------------------------------------------|
|                                      |                                                           |
| Rules_139                            | passed counts:1                                           |
| node_0:<br>feature_name=cg11915444   | feature_id[4116].value ><br>threshold=0.3402601182460785  |
| node_10:<br>feature_name=cg12109728  | feature_id[4182].value ><br>threshold=0.7068270146846771  |
| node_20:<br>feature_name=cg10844382  | feature_id[3856].value ><br>threshold=0.5988894104957581  |
| node_24:<br>feature_name=cg00631702  | feature_id[943].value <=<br>threshold=0.37470583617687225 |
| node_25:<br>feature_name=cg07912144  | feature_id[3075].value ><br>threshold=0.5578519105911255  |
| node_29:<br>feature_name=cg24407065  | feature_id[388].value ><br>threshold=0.5364363789558411   |
| node_33:<br>feature_name=cg15275017  | feature_id[5069].value ><br>threshold=0.4538573920726776  |
| node_51:<br>feature_name=cg07281938  | feature_id[351].value ><br>threshold=0.7506992518901825   |
| node_73:<br>feature_name=cg17524821  | feature_id[5626].value ><br>threshold=0.4504699558019638  |
| node_75:<br>feature_name=cg02973735  | feature_id[1677].value ><br>threshold=0.29383400082588196 |
| node_77:<br>feature_name=cg23345038  | feature_id[7002].value ><br>threshold=0.6255057156085968  |
| node_79:<br>feature_name=cg17537493  | feature_id[5630].value ><br>threshold=0.5825372636318207  |
| node_85:<br>feature_name=cg12948116  | feature_id[4375].value <=<br>threshold=0.5658791363239288 |
| node_86:<br>feature_name=cg06038180  | feature_id[2529].value ><br>threshold=0.43877437710762024 |
| node_88:<br>feature_name=cg15720017  | feature_id[5175].value ><br>threshold=0.7009969055652618  |
| node_90:<br>feature_name=cg13070215  | feature_id[314].value <=<br>threshold=0.14645694941282272 |
| node_91:<br>feature_name=cg01014262  | feature_id[1082].value <=<br>threshold=0.5737917125225067 |
| node_92:<br>feature_name=cg16863382  | feature_id[5471].value ><br>threshold=0.7200668156147003  |
| node_102:<br>feature_name=cg06633739 | feature_id[2686].value ><br>threshold=0.47115950286388397 |
| node_126:<br>feature_name=cg22946562 | feature_id[744].value <=<br>threshold=0.6194809079170227  |

|                                                                                   |                                                           |
|-----------------------------------------------------------------------------------|-----------------------------------------------------------|
| node_127:<br>feature_name=cg23920016                                              | feature_id[7139].value ><br>threshold=0.7449243068695068  |
| node_151:<br>feature_name=cg21617218                                              | feature_id[6608].value ><br>threshold=0.8795748353004456  |
| node_153:<br>feature_name=cg01663970                                              | feature_id[1273].value ><br>threshold=0.8442256152629852  |
| node_155:<br>feature_name=cg00686915                                              | feature_id[965].value ><br>threshold=0.20000632852315903  |
| node_157:<br>feature_name=cg11628781                                              | feature_id[4033].value <=<br>threshold=0.9032271206378937 |
| node_158:<br>feature_name=cg20173014                                              | feature_id[6271].value ><br>threshold=0.8712336122989655  |
| node_160:<br>feature_name=cg04961225                                              | feature_id[2231].value ><br>threshold=0.6663023084402084  |
| node_162:<br>feature_name=cg14340089                                              | feature_id[4825].value ><br>threshold=0.6815699338912964  |
| node_164:<br>feature_name=cg04576568                                              | feature_id[2126].value <=<br>threshold=0.5339387804269791 |
| Class: well differentiated liposarcoma (WDLs)/dedifferentiated liposarcoma (DDLs) |                                                           |
|                                                                                   |                                                           |
| Rules_140                                                                         | passed counts:1                                           |
| node_0:<br>feature_name=cg11915444                                                | feature_id[4116].value ><br>threshold=0.3402601182460785  |
| node_10:<br>feature_name=cg12109728                                               | feature_id[4182].value ><br>threshold=0.7068270146846771  |
| node_20:<br>feature_name=cg10844382                                               | feature_id[3856].value ><br>threshold=0.5988894104957581  |
| node_24:<br>feature_name=cg00631702                                               | feature_id[943].value <=<br>threshold=0.37470583617687225 |
| node_25:<br>feature_name=cg07912144                                               | feature_id[3075].value ><br>threshold=0.5578519105911255  |
| node_29:<br>feature_name=cg24407065                                               | feature_id[388].value ><br>threshold=0.5364363789558411   |
| node_33:<br>feature_name=cg15275017                                               | feature_id[5069].value ><br>threshold=0.4538573920726776  |
| node_51:<br>feature_name=cg07281938                                               | feature_id[351].value ><br>threshold=0.7506992518901825   |
| node_73:<br>feature_name=cg17524821                                               | feature_id[5626].value ><br>threshold=0.4504699558019638  |
| node_75:<br>feature_name=cg02973735                                               | feature_id[1677].value ><br>threshold=0.29383400082588196 |
| node_77:<br>feature_name=cg23345038                                               | feature_id[7002].value ><br>threshold=0.6255057156085968  |

|                                      |                                                           |
|--------------------------------------|-----------------------------------------------------------|
| node_79:<br>feature_name=cg17537493  | feature_id[5630].value ><br>threshold=0.5825372636318207  |
| node_85:<br>feature_name=cg12948116  | feature_id[4375].value <=<br>threshold=0.5658791363239288 |
| node_86:<br>feature_name=cg06038180  | feature_id[2529].value ><br>threshold=0.43877437710762024 |
| node_88:<br>feature_name=cg15720017  | feature_id[5175].value ><br>threshold=0.7009969055652618  |
| node_90:<br>feature_name=cg13070215  | feature_id[314].value <=<br>threshold=0.14645694941282272 |
| node_91:<br>feature_name=cg01014262  | feature_id[1082].value <=<br>threshold=0.5737917125225067 |
| node_92:<br>feature_name=cg16863382  | feature_id[5471].value ><br>threshold=0.7200668156147003  |
| node_102:<br>feature_name=cg06633739 | feature_id[2686].value ><br>threshold=0.47115950286388397 |
| node_126:<br>feature_name=cg22946562 | feature_id[744].value <=<br>threshold=0.6194809079170227  |
| node_127:<br>feature_name=cg23920016 | feature_id[7139].value ><br>threshold=0.7449243068695068  |
| node_151:<br>feature_name=cg21617218 | feature_id[6608].value ><br>threshold=0.8795748353004456  |
| node_153:<br>feature_name=cg01663970 | feature_id[1273].value ><br>threshold=0.8442256152629852  |
| node_155:<br>feature_name=cg00686915 | feature_id[965].value ><br>threshold=0.20000632852315903  |
| node_157:<br>feature_name=cg11628781 | feature_id[4033].value <=<br>threshold=0.9032271206378937 |
| node_158:<br>feature_name=cg20173014 | feature_id[6271].value ><br>threshold=0.8712336122989655  |
| node_160:<br>feature_name=cg04961225 | feature_id[2231].value ><br>threshold=0.6663023084402084  |
| node_162:<br>feature_name=cg14340089 | feature_id[4825].value <=<br>threshold=0.6815699338912964 |
| Class: Ewing sarcoma (EWING)         |                                                           |
|                                      |                                                           |
| Rules_141                            | passed counts:1                                           |
| node_0:<br>feature_name=cg11915444   | feature_id[4116].value ><br>threshold=0.3402601182460785  |
| node_10:<br>feature_name=cg12109728  | feature_id[4182].value ><br>threshold=0.7068270146846771  |
| node_20:<br>feature_name=cg10844382  | feature_id[3856].value ><br>threshold=0.5988894104957581  |

|                                      |                                                           |
|--------------------------------------|-----------------------------------------------------------|
| node_24:<br>feature_name=cg00631702  | feature_id[943].value <=<br>threshold=0.37470583617687225 |
| node_25:<br>feature_name=cg07912144  | feature_id[3075].value ><br>threshold=0.5578519105911255  |
| node_29:<br>feature_name=cg24407065  | feature_id[388].value ><br>threshold=0.5364363789558411   |
| node_33:<br>feature_name=cg15275017  | feature_id[5069].value ><br>threshold=0.4538573920726776  |
| node_51:<br>feature_name=cg07281938  | feature_id[351].value ><br>threshold=0.7506992518901825   |
| node_73:<br>feature_name=cg17524821  | feature_id[5626].value ><br>threshold=0.4504699558019638  |
| node_75:<br>feature_name=cg02973735  | feature_id[1677].value ><br>threshold=0.29383400082588196 |
| node_77:<br>feature_name=cg23345038  | feature_id[7002].value ><br>threshold=0.6255057156085968  |
| node_79:<br>feature_name=cg17537493  | feature_id[5630].value ><br>threshold=0.5825372636318207  |
| node_85:<br>feature_name=cg12948116  | feature_id[4375].value <=<br>threshold=0.5658791363239288 |
| node_86:<br>feature_name=cg06038180  | feature_id[2529].value ><br>threshold=0.43877437710762024 |
| node_88:<br>feature_name=cg15720017  | feature_id[5175].value ><br>threshold=0.7009969055652618  |
| node_90:<br>feature_name=cg13070215  | feature_id[314].value <=<br>threshold=0.14645694941282272 |
| node_91:<br>feature_name=cg01014262  | feature_id[1082].value <=<br>threshold=0.5737917125225067 |
| node_92:<br>feature_name=cg16863382  | feature_id[5471].value ><br>threshold=0.7200668156147003  |
| node_102:<br>feature_name=cg06633739 | feature_id[2686].value ><br>threshold=0.47115950286388397 |
| node_126:<br>feature_name=cg22946562 | feature_id[744].value <=<br>threshold=0.6194809079170227  |
| node_127:<br>feature_name=cg23920016 | feature_id[7139].value ><br>threshold=0.7449243068695068  |
| node_151:<br>feature_name=cg21617218 | feature_id[6608].value ><br>threshold=0.8795748353004456  |
| node_153:<br>feature_name=cg01663970 | feature_id[1273].value ><br>threshold=0.8442256152629852  |
| node_155:<br>feature_name=cg00686915 | feature_id[965].value ><br>threshold=0.20000632852315903  |
| node_157:<br>feature_name=cg11628781 | feature_id[4033].value <=<br>threshold=0.9032271206378937 |

|                                                                      |                                                           |
|----------------------------------------------------------------------|-----------------------------------------------------------|
| node_158:<br>feature_name=cg20173014                                 | feature_id[6271].value ><br>threshold=0.8712336122989655  |
| node_160:<br>feature_name=cg04961225                                 | feature_id[2231].value <=<br>threshold=0.6663023084402084 |
| Class: atypical fibroxanthoma (AFX)/pleomorphic dermal sarcoma (PDS) |                                                           |
|                                                                      |                                                           |
| Rules_142                                                            | passed counts:1                                           |
| node_0:<br>feature_name=cg11915444                                   | feature_id[4116].value ><br>threshold=0.3402601182460785  |
| node_10:<br>feature_name=cg12109728                                  | feature_id[4182].value ><br>threshold=0.7068270146846771  |
| node_20:<br>feature_name=cg10844382                                  | feature_id[3856].value ><br>threshold=0.5988894104957581  |
| node_24:<br>feature_name=cg00631702                                  | feature_id[943].value <=<br>threshold=0.37470583617687225 |
| node_25:<br>feature_name=cg07912144                                  | feature_id[3075].value ><br>threshold=0.5578519105911255  |
| node_29:<br>feature_name=cg24407065                                  | feature_id[388].value ><br>threshold=0.5364363789558411   |
| node_33:<br>feature_name=cg15275017                                  | feature_id[5069].value ><br>threshold=0.4538573920726776  |
| node_51:<br>feature_name=cg07281938                                  | feature_id[351].value ><br>threshold=0.7506992518901825   |
| node_73:<br>feature_name=cg17524821                                  | feature_id[5626].value ><br>threshold=0.4504699558019638  |
| node_75:<br>feature_name=cg02973735                                  | feature_id[1677].value ><br>threshold=0.29383400082588196 |
| node_77:<br>feature_name=cg23345038                                  | feature_id[7002].value ><br>threshold=0.6255057156085968  |
| node_79:<br>feature_name=cg17537493                                  | feature_id[5630].value ><br>threshold=0.5825372636318207  |
| node_85:<br>feature_name=cg12948116                                  | feature_id[4375].value <=<br>threshold=0.5658791363239288 |
| node_86:<br>feature_name=cg06038180                                  | feature_id[2529].value ><br>threshold=0.43877437710762024 |
| node_88:<br>feature_name=cg15720017                                  | feature_id[5175].value ><br>threshold=0.7009969055652618  |
| node_90:<br>feature_name=cg13070215                                  | feature_id[314].value <=<br>threshold=0.14645694941282272 |
| node_91:<br>feature_name=cg01014262                                  | feature_id[1082].value <=<br>threshold=0.5737917125225067 |
| node_92:<br>feature_name=cg16863382                                  | feature_id[5471].value ><br>threshold=0.7200668156147003  |

|                                               |                                                           |
|-----------------------------------------------|-----------------------------------------------------------|
| node_102:<br>feature_name=cg06633739          | feature_id[2686].value ><br>threshold=0.47115950286388397 |
| node_126:<br>feature_name=cg22946562          | feature_id[744].value <=<br>threshold=0.6194809079170227  |
| node_127:<br>feature_name=cg23920016          | feature_id[7139].value ><br>threshold=0.7449243068695068  |
| node_151:<br>feature_name=cg21617218          | feature_id[6608].value ><br>threshold=0.8795748353004456  |
| node_153:<br>feature_name=cg01663970          | feature_id[1273].value ><br>threshold=0.8442256152629852  |
| node_155:<br>feature_name=cg00686915          | feature_id[965].value ><br>threshold=0.20000632852315903  |
| node_157:<br>feature_name=cg11628781          | feature_id[4033].value <=<br>threshold=0.9032271206378937 |
| node_158:<br>feature_name=cg20173014          | feature_id[6271].value <=<br>threshold=0.8712336122989655 |
| Class: gastrointestinal stromal tumour (GIST) |                                                           |
|                                               |                                                           |
| Rules_143                                     | passed counts:1                                           |
| node_0:<br>feature_name=cg11915444            | feature_id[4116].value ><br>threshold=0.3402601182460785  |
| node_10:<br>feature_name=cg12109728           | feature_id[4182].value ><br>threshold=0.7068270146846771  |
| node_20:<br>feature_name=cg10844382           | feature_id[3856].value ><br>threshold=0.5988894104957581  |
| node_24:<br>feature_name=cg00631702           | feature_id[943].value <=<br>threshold=0.37470583617687225 |
| node_25:<br>feature_name=cg07912144           | feature_id[3075].value ><br>threshold=0.5578519105911255  |
| node_29:<br>feature_name=cg24407065           | feature_id[388].value ><br>threshold=0.5364363789558411   |
| node_33:<br>feature_name=cg15275017           | feature_id[5069].value ><br>threshold=0.4538573920726776  |
| node_51:<br>feature_name=cg07281938           | feature_id[351].value ><br>threshold=0.7506992518901825   |
| node_73:<br>feature_name=cg17524821           | feature_id[5626].value ><br>threshold=0.4504699558019638  |
| node_75:<br>feature_name=cg02973735           | feature_id[1677].value ><br>threshold=0.29383400082588196 |
| node_77:<br>feature_name=cg23345038           | feature_id[7002].value ><br>threshold=0.6255057156085968  |
| node_79:<br>feature_name=cg17537493           | feature_id[5630].value ><br>threshold=0.5825372636318207  |



|                                      |                                                           |
|--------------------------------------|-----------------------------------------------------------|
| node_85:<br>feature_name=cg12948116  | feature_id[4375].value <=<br>threshold=0.5658791363239288 |
| node_86:<br>feature_name=cg06038180  | feature_id[2529].value ><br>threshold=0.43877437710762024 |
| node_88:<br>feature_name=cg15720017  | feature_id[5175].value ><br>threshold=0.7009969055652618  |
| node_90:<br>feature_name=cg13070215  | feature_id[314].value <=<br>threshold=0.14645694941282272 |
| node_91:<br>feature_name=cg01014262  | feature_id[1082].value <=<br>threshold=0.5737917125225067 |
| node_92:<br>feature_name=cg16863382  | feature_id[5471].value ><br>threshold=0.7200668156147003  |
| node_102:<br>feature_name=cg06633739 | feature_id[2686].value ><br>threshold=0.47115950286388397 |
| node_126:<br>feature_name=cg22946562 | feature_id[744].value <=<br>threshold=0.6194809079170227  |
| node_127:<br>feature_name=cg23920016 | feature_id[7139].value <=<br>threshold=0.7449243068695068 |
| node_128:<br>feature_name=cg16521032 | feature_id[5379].value ><br>threshold=0.8948074877262115  |
| node_136:<br>feature_name=cg22345063 | feature_id[6755].value ><br>threshold=0.38597847521305084 |
| node_144:<br>feature_name=cg05650238 | feature_id[2427].value <=<br>threshold=0.7126822769641876 |
| node_145:<br>feature_name=cg20757748 | feature_id[6410].value ><br>threshold=0.3033527359366417  |
| node_147:<br>feature_name=cg06586578 | feature_id[2671].value ><br>threshold=0.83711838722229    |
| Class: leiomyosarcoma (LMS)          |                                                           |
|                                      |                                                           |
| Rules_144                            | passed counts:1                                           |
| node_0:<br>feature_name=cg11915444   | feature_id[4116].value ><br>threshold=0.3402601182460785  |
| node_10:<br>feature_name=cg12109728  | feature_id[4182].value ><br>threshold=0.7068270146846771  |
| node_20:<br>feature_name=cg10844382  | feature_id[3856].value ><br>threshold=0.5988894104957581  |
| node_24:<br>feature_name=cg00631702  | feature_id[943].value <=<br>threshold=0.37470583617687225 |
| node_25:<br>feature_name=cg07912144  | feature_id[3075].value ><br>threshold=0.5578519105911255  |
| node_29:<br>feature_name=cg24407065  | feature_id[388].value ><br>threshold=0.5364363789558411   |

|                                         |                                                           |
|-----------------------------------------|-----------------------------------------------------------|
| node_33:<br>feature_name=cg15275017     | feature_id[5069].value ><br>threshold=0.4538573920726776  |
| node_51:<br>feature_name=cg07281938     | feature_id[351].value ><br>threshold=0.7506992518901825   |
| node_73:<br>feature_name=cg17524821     | feature_id[5626].value ><br>threshold=0.4504699558019638  |
| node_75:<br>feature_name=cg02973735     | feature_id[1677].value ><br>threshold=0.29383400082588196 |
| node_77:<br>feature_name=cg23345038     | feature_id[7002].value ><br>threshold=0.6255057156085968  |
| node_79:<br>feature_name=cg17537493     | feature_id[5630].value ><br>threshold=0.5825372636318207  |
| node_85:<br>feature_name=cg12948116     | feature_id[4375].value <=<br>threshold=0.5658791363239288 |
| node_86:<br>feature_name=cg06038180     | feature_id[2529].value ><br>threshold=0.43877437710762024 |
| node_88:<br>feature_name=cg15720017     | feature_id[5175].value ><br>threshold=0.7009969055652618  |
| node_90:<br>feature_name=cg13070215     | feature_id[314].value <=<br>threshold=0.14645694941282272 |
| node_91:<br>feature_name=cg01014262     | feature_id[1082].value <=<br>threshold=0.5737917125225067 |
| node_92:<br>feature_name=cg16863382     | feature_id[5471].value ><br>threshold=0.7200668156147003  |
| node_102:<br>feature_name=cg06633739    | feature_id[2686].value ><br>threshold=0.47115950286388397 |
| node_126:<br>feature_name=cg22946562    | feature_id[744].value <=<br>threshold=0.6194809079170227  |
| node_127:<br>feature_name=cg23920016    | feature_id[7139].value <=<br>threshold=0.7449243068695068 |
| node_128:<br>feature_name=cg16521032    | feature_id[5379].value ><br>threshold=0.8948074877262115  |
| node_136:<br>feature_name=cg22345063    | feature_id[6755].value ><br>threshold=0.38597847521305084 |
| node_144:<br>feature_name=cg05650238    | feature_id[2427].value <=<br>threshold=0.7126822769641876 |
| node_145:<br>feature_name=cg20757748    | feature_id[6410].value ><br>threshold=0.3033527359366417  |
| node_147:<br>feature_name=cg06586578    | feature_id[2671].value <=<br>threshold=0.83711838722229   |
| Class: giant cell tumour of bone (GCTB) |                                                           |
|                                         |                                                           |
| Rules_145                               | passed counts:1                                           |

|                                      |                                                           |
|--------------------------------------|-----------------------------------------------------------|
| node_0:<br>feature_name=cg11915444   | feature_id[4116].value ><br>threshold=0.3402601182460785  |
| node_10:<br>feature_name=cg12109728  | feature_id[4182].value ><br>threshold=0.7068270146846771  |
| node_20:<br>feature_name=cg10844382  | feature_id[3856].value ><br>threshold=0.5988894104957581  |
| node_24:<br>feature_name=cg00631702  | feature_id[943].value <=<br>threshold=0.37470583617687225 |
| node_25:<br>feature_name=cg07912144  | feature_id[3075].value ><br>threshold=0.5578519105911255  |
| node_29:<br>feature_name=cg24407065  | feature_id[388].value ><br>threshold=0.5364363789558411   |
| node_33:<br>feature_name=cg15275017  | feature_id[5069].value ><br>threshold=0.4538573920726776  |
| node_51:<br>feature_name=cg07281938  | feature_id[351].value ><br>threshold=0.7506992518901825   |
| node_73:<br>feature_name=cg17524821  | feature_id[5626].value ><br>threshold=0.4504699558019638  |
| node_75:<br>feature_name=cg02973735  | feature_id[1677].value ><br>threshold=0.29383400082588196 |
| node_77:<br>feature_name=cg23345038  | feature_id[7002].value ><br>threshold=0.6255057156085968  |
| node_79:<br>feature_name=cg17537493  | feature_id[5630].value ><br>threshold=0.5825372636318207  |
| node_85:<br>feature_name=cg12948116  | feature_id[4375].value <=<br>threshold=0.5658791363239288 |
| node_86:<br>feature_name=cg06038180  | feature_id[2529].value ><br>threshold=0.43877437710762024 |
| node_88:<br>feature_name=cg15720017  | feature_id[5175].value ><br>threshold=0.7009969055652618  |
| node_90:<br>feature_name=cg13070215  | feature_id[314].value <=<br>threshold=0.14645694941282272 |
| node_91:<br>feature_name=cg01014262  | feature_id[1082].value <=<br>threshold=0.5737917125225067 |
| node_92:<br>feature_name=cg16863382  | feature_id[5471].value ><br>threshold=0.7200668156147003  |
| node_102:<br>feature_name=cg06633739 | feature_id[2686].value ><br>threshold=0.47115950286388397 |
| node_126:<br>feature_name=cg22946562 | feature_id[744].value <=<br>threshold=0.6194809079170227  |
| node_127:<br>feature_name=cg23920016 | feature_id[7139].value <=<br>threshold=0.7449243068695068 |
| node_128:<br>feature_name=cg16521032 | feature_id[5379].value ><br>threshold=0.8948074877262115  |

|                                      |                                                           |
|--------------------------------------|-----------------------------------------------------------|
| node_136:<br>feature_name=cg22345063 | feature_id[6755].value ><br>threshold=0.38597847521305084 |
| node_144:<br>feature_name=cg05650238 | feature_id[2427].value <=<br>threshold=0.7126822769641876 |
| node_145:<br>feature_name=cg20757748 | feature_id[6410].value <=<br>threshold=0.3033527359366417 |
| Class: chondroblastoma (CB)          |                                                           |
|                                      |                                                           |
| Rules_146                            | passed counts:1                                           |
| node_0:<br>feature_name=cg11915444   | feature_id[4116].value ><br>threshold=0.3402601182460785  |
| node_10:<br>feature_name=cg12109728  | feature_id[4182].value ><br>threshold=0.7068270146846771  |
| node_20:<br>feature_name=cg10844382  | feature_id[3856].value ><br>threshold=0.5988894104957581  |
| node_24:<br>feature_name=cg00631702  | feature_id[943].value <=<br>threshold=0.37470583617687225 |
| node_25:<br>feature_name=cg07912144  | feature_id[3075].value ><br>threshold=0.5578519105911255  |
| node_29:<br>feature_name=cg24407065  | feature_id[388].value ><br>threshold=0.5364363789558411   |
| node_33:<br>feature_name=cg15275017  | feature_id[5069].value ><br>threshold=0.4538573920726776  |
| node_51:<br>feature_name=cg07281938  | feature_id[351].value ><br>threshold=0.7506992518901825   |
| node_73:<br>feature_name=cg17524821  | feature_id[5626].value ><br>threshold=0.4504699558019638  |
| node_75:<br>feature_name=cg02973735  | feature_id[1677].value ><br>threshold=0.29383400082588196 |
| node_77:<br>feature_name=cg23345038  | feature_id[7002].value ><br>threshold=0.6255057156085968  |
| node_79:<br>feature_name=cg17537493  | feature_id[5630].value ><br>threshold=0.5825372636318207  |
| node_85:<br>feature_name=cg12948116  | feature_id[4375].value <=<br>threshold=0.5658791363239288 |
| node_86:<br>feature_name=cg06038180  | feature_id[2529].value ><br>threshold=0.43877437710762024 |
| node_88:<br>feature_name=cg15720017  | feature_id[5175].value ><br>threshold=0.7009969055652618  |
| node_90:<br>feature_name=cg13070215  | feature_id[314].value <=<br>threshold=0.14645694941282272 |
| node_91:<br>feature_name=cg01014262  | feature_id[1082].value <=<br>threshold=0.5737917125225067 |

|                                          |                                                            |
|------------------------------------------|------------------------------------------------------------|
| node_92:<br>feature_name=cg16863382      | feature_id[5471].value ><br>threshold=0.7200668156147003   |
| node_102:<br>feature_name=cg06633739     | feature_id[2686].value ><br>threshold=0.47115950286388397  |
| node_126:<br>feature_name=cg22946562     | feature_id[744].value <=<br>threshold=0.6194809079170227   |
| node_127:<br>feature_name=cg23920016     | feature_id[7139].value <=<br>threshold=0.7449243068695068  |
| node_128:<br>feature_name=cg16521032     | feature_id[5379].value ><br>threshold=0.8948074877262115   |
| node_136:<br>feature_name=cg22345063     | feature_id[6755].value <=<br>threshold=0.38597847521305084 |
| node_137:<br>feature_name=cg24033503     | feature_id[7174].value <=<br>threshold=0.9229673147201538  |
| node_138:<br>feature_name=cg24090911     | feature_id[7186].value ><br>threshold=0.16473388671875     |
| node_140:<br>feature_name=cg24881558     | feature_id[7382].value ><br>threshold=0.632175624370575    |
| Class: alveolar soft part sarcoma (ASPS) |                                                            |
|                                          |                                                            |
| Rules_147                                | passed counts:1                                            |
| node_0:<br>feature_name=cg11915444       | feature_id[4116].value ><br>threshold=0.3402601182460785   |
| node_10:<br>feature_name=cg12109728      | feature_id[4182].value ><br>threshold=0.7068270146846771   |
| node_20:<br>feature_name=cg10844382      | feature_id[3856].value ><br>threshold=0.5988894104957581   |
| node_24:<br>feature_name=cg00631702      | feature_id[943].value <=<br>threshold=0.37470583617687225  |
| node_25:<br>feature_name=cg07912144      | feature_id[3075].value ><br>threshold=0.5578519105911255   |
| node_29:<br>feature_name=cg24407065      | feature_id[388].value ><br>threshold=0.5364363789558411    |
| node_33:<br>feature_name=cg15275017      | feature_id[5069].value ><br>threshold=0.4538573920726776   |
| node_51:<br>feature_name=cg07281938      | feature_id[351].value ><br>threshold=0.7506992518901825    |
| node_73:<br>feature_name=cg17524821      | feature_id[5626].value ><br>threshold=0.4504699558019638   |
| node_75:<br>feature_name=cg02973735      | feature_id[1677].value ><br>threshold=0.29383400082588196  |
| node_77:<br>feature_name=cg23345038      | feature_id[7002].value ><br>threshold=0.6255057156085968   |

|                                                       |                                                            |
|-------------------------------------------------------|------------------------------------------------------------|
| node_79:<br>feature_name=cg17537493                   | feature_id[5630].value ><br>threshold=0.5825372636318207   |
| node_85:<br>feature_name=cg12948116                   | feature_id[4375].value <=<br>threshold=0.5658791363239288  |
| node_86:<br>feature_name=cg06038180                   | feature_id[2529].value ><br>threshold=0.43877437710762024  |
| node_88:<br>feature_name=cg15720017                   | feature_id[5175].value ><br>threshold=0.7009969055652618   |
| node_90:<br>feature_name=cg13070215                   | feature_id[314].value <=<br>threshold=0.14645694941282272  |
| node_91:<br>feature_name=cg01014262                   | feature_id[1082].value <=<br>threshold=0.5737917125225067  |
| node_92:<br>feature_name=cg16863382                   | feature_id[5471].value ><br>threshold=0.7200668156147003   |
| node_102:<br>feature_name=cg06633739                  | feature_id[2686].value ><br>threshold=0.47115950286388397  |
| node_126:<br>feature_name=cg22946562                  | feature_id[744].value <=<br>threshold=0.6194809079170227   |
| node_127:<br>feature_name=cg23920016                  | feature_id[7139].value <=<br>threshold=0.7449243068695068  |
| node_128:<br>feature_name=cg16521032                  | feature_id[5379].value ><br>threshold=0.8948074877262115   |
| node_136:<br>feature_name=cg22345063                  | feature_id[6755].value <=<br>threshold=0.38597847521305084 |
| node_137:<br>feature_name=cg24033503                  | feature_id[7174].value <=<br>threshold=0.9229673147201538  |
| node_138:<br>feature_name=cg24090911                  | feature_id[7186].value ><br>threshold=0.16473388671875     |
| node_140:<br>feature_name=cg24881558                  | feature_id[7382].value <=<br>threshold=0.632175624370575   |
| Class: high-grade conventional osteosarcoma (OS (HG)) |                                                            |
|                                                       |                                                            |
| Rules_148                                             | passed counts:1                                            |
| node_0:<br>feature_name=cg11915444                    | feature_id[4116].value ><br>threshold=0.3402601182460785   |
| node_10:<br>feature_name=cg12109728                   | feature_id[4182].value ><br>threshold=0.7068270146846771   |
| node_20:<br>feature_name=cg10844382                   | feature_id[3856].value ><br>threshold=0.5988894104957581   |
| node_24:<br>feature_name=cg00631702                   | feature_id[943].value <=<br>threshold=0.37470583617687225  |
| node_25:<br>feature_name=cg07912144                   | feature_id[3075].value ><br>threshold=0.5578519105911255   |

|                                                         |                                                            |
|---------------------------------------------------------|------------------------------------------------------------|
| node_29:<br>feature_name=cg24407065                     | feature_id[388].value ><br>threshold=0.5364363789558411    |
| node_33:<br>feature_name=cg15275017                     | feature_id[5069].value ><br>threshold=0.4538573920726776   |
| node_51:<br>feature_name=cg07281938                     | feature_id[351].value ><br>threshold=0.7506992518901825    |
| node_73:<br>feature_name=cg17524821                     | feature_id[5626].value ><br>threshold=0.4504699558019638   |
| node_75:<br>feature_name=cg02973735                     | feature_id[1677].value ><br>threshold=0.29383400082588196  |
| node_77:<br>feature_name=cg23345038                     | feature_id[7002].value ><br>threshold=0.6255057156085968   |
| node_79:<br>feature_name=cg17537493                     | feature_id[5630].value ><br>threshold=0.5825372636318207   |
| node_85:<br>feature_name=cg12948116                     | feature_id[4375].value <=<br>threshold=0.5658791363239288  |
| node_86:<br>feature_name=cg06038180                     | feature_id[2529].value ><br>threshold=0.43877437710762024  |
| node_88:<br>feature_name=cg15720017                     | feature_id[5175].value ><br>threshold=0.7009969055652618   |
| node_90:<br>feature_name=cg13070215                     | feature_id[314].value <=<br>threshold=0.14645694941282272  |
| node_91:<br>feature_name=cg01014262                     | feature_id[1082].value <=<br>threshold=0.5737917125225067  |
| node_92:<br>feature_name=cg16863382                     | feature_id[5471].value ><br>threshold=0.7200668156147003   |
| node_102:<br>feature_name=cg06633739                    | feature_id[2686].value ><br>threshold=0.47115950286388397  |
| node_126:<br>feature_name=cg22946562                    | feature_id[744].value <=<br>threshold=0.6194809079170227   |
| node_127:<br>feature_name=cg23920016                    | feature_id[7139].value <=<br>threshold=0.7449243068695068  |
| node_128:<br>feature_name=cg16521032                    | feature_id[5379].value ><br>threshold=0.8948074877262115   |
| node_136:<br>feature_name=cg22345063                    | feature_id[6755].value <=<br>threshold=0.38597847521305084 |
| node_137:<br>feature_name=cg24033503                    | feature_id[7174].value <=<br>threshold=0.9229673147201538  |
| node_138:<br>feature_name=cg24090911                    | feature_id[7186].value <=<br>threshold=0.16473388671875    |
| Class: malignant peripheral nerve sheath tumour (MPNST) |                                                            |
|                                                         |                                                            |
| Rules_149                                               | passed counts:1                                            |

|                                      |                                                           |
|--------------------------------------|-----------------------------------------------------------|
| node_0:<br>feature_name=cg11915444   | feature_id[4116].value ><br>threshold=0.3402601182460785  |
| node_10:<br>feature_name=cg12109728  | feature_id[4182].value ><br>threshold=0.7068270146846771  |
| node_20:<br>feature_name=cg10844382  | feature_id[3856].value ><br>threshold=0.5988894104957581  |
| node_24:<br>feature_name=cg00631702  | feature_id[943].value <=<br>threshold=0.37470583617687225 |
| node_25:<br>feature_name=cg07912144  | feature_id[3075].value ><br>threshold=0.5578519105911255  |
| node_29:<br>feature_name=cg24407065  | feature_id[388].value ><br>threshold=0.5364363789558411   |
| node_33:<br>feature_name=cg15275017  | feature_id[5069].value ><br>threshold=0.4538573920726776  |
| node_51:<br>feature_name=cg07281938  | feature_id[351].value ><br>threshold=0.7506992518901825   |
| node_73:<br>feature_name=cg17524821  | feature_id[5626].value ><br>threshold=0.4504699558019638  |
| node_75:<br>feature_name=cg02973735  | feature_id[1677].value ><br>threshold=0.29383400082588196 |
| node_77:<br>feature_name=cg23345038  | feature_id[7002].value ><br>threshold=0.6255057156085968  |
| node_79:<br>feature_name=cg17537493  | feature_id[5630].value ><br>threshold=0.5825372636318207  |
| node_85:<br>feature_name=cg12948116  | feature_id[4375].value <=<br>threshold=0.5658791363239288 |
| node_86:<br>feature_name=cg06038180  | feature_id[2529].value ><br>threshold=0.43877437710762024 |
| node_88:<br>feature_name=cg15720017  | feature_id[5175].value ><br>threshold=0.7009969055652618  |
| node_90:<br>feature_name=cg13070215  | feature_id[314].value <=<br>threshold=0.14645694941282272 |
| node_91:<br>feature_name=cg01014262  | feature_id[1082].value <=<br>threshold=0.5737917125225067 |
| node_92:<br>feature_name=cg16863382  | feature_id[5471].value ><br>threshold=0.7200668156147003  |
| node_102:<br>feature_name=cg06633739 | feature_id[2686].value ><br>threshold=0.47115950286388397 |
| node_126:<br>feature_name=cg22946562 | feature_id[744].value <=<br>threshold=0.6194809079170227  |
| node_127:<br>feature_name=cg23920016 | feature_id[7139].value <=<br>threshold=0.7449243068695068 |
| node_128:<br>feature_name=cg16521032 | feature_id[5379].value <=<br>threshold=0.8948074877262115 |



|                                                      |                                                           |
|------------------------------------------------------|-----------------------------------------------------------|
| node_129:<br>feature_name=cg09597070                 | feature_id[555].value <=<br>threshold=0.67006054520607    |
| node_130:<br>feature_name=cg08411881                 | feature_id[3200].value <=<br>threshold=0.7572305798530579 |
| node_131:<br>feature_name=cg16636756                 | feature_id[5414].value ><br>threshold=0.15655579417943954 |
| Class: cutaneous squamous cell carcinoma (SCC (CUT)) |                                                           |
|                                                      |                                                           |
| Rules_150                                            | passed counts:1                                           |
| node_0:<br>feature_name=cg11915444                   | feature_id[4116].value ><br>threshold=0.3402601182460785  |
| node_10:<br>feature_name=cg12109728                  | feature_id[4182].value ><br>threshold=0.7068270146846771  |
| node_20:<br>feature_name=cg10844382                  | feature_id[3856].value ><br>threshold=0.5988894104957581  |
| node_24:<br>feature_name=cg00631702                  | feature_id[943].value <=<br>threshold=0.37470583617687225 |
| node_25:<br>feature_name=cg07912144                  | feature_id[3075].value ><br>threshold=0.5578519105911255  |
| node_29:<br>feature_name=cg24407065                  | feature_id[388].value ><br>threshold=0.5364363789558411   |
| node_33:<br>feature_name=cg15275017                  | feature_id[5069].value ><br>threshold=0.4538573920726776  |
| node_51:<br>feature_name=cg07281938                  | feature_id[351].value ><br>threshold=0.7506992518901825   |
| node_73:<br>feature_name=cg17524821                  | feature_id[5626].value ><br>threshold=0.4504699558019638  |
| node_75:<br>feature_name=cg02973735                  | feature_id[1677].value ><br>threshold=0.29383400082588196 |
| node_77:<br>feature_name=cg23345038                  | feature_id[7002].value ><br>threshold=0.6255057156085968  |
| node_79:<br>feature_name=cg17537493                  | feature_id[5630].value ><br>threshold=0.5825372636318207  |
| node_85:<br>feature_name=cg12948116                  | feature_id[4375].value <=<br>threshold=0.5658791363239288 |
| node_86:<br>feature_name=cg06038180                  | feature_id[2529].value ><br>threshold=0.43877437710762024 |
| node_88:<br>feature_name=cg15720017                  | feature_id[5175].value ><br>threshold=0.7009969055652618  |
| node_90:<br>feature_name=cg13070215                  | feature_id[314].value <=<br>threshold=0.14645694941282272 |
| node_91:<br>feature_name=cg01014262                  | feature_id[1082].value <=<br>threshold=0.5737917125225067 |

|                                      |                                                            |
|--------------------------------------|------------------------------------------------------------|
| node_92:<br>feature_name=cg16863382  | feature_id[5471].value ><br>threshold=0.7200668156147003   |
| node_102:<br>feature_name=cg06633739 | feature_id[2686].value ><br>threshold=0.47115950286388397  |
| node_126:<br>feature_name=cg22946562 | feature_id[744].value <=<br>threshold=0.6194809079170227   |
| node_127:<br>feature_name=cg23920016 | feature_id[7139].value <=<br>threshold=0.7449243068695068  |
| node_128:<br>feature_name=cg16521032 | feature_id[5379].value <=<br>threshold=0.8948074877262115  |
| node_129:<br>feature_name=cg09597070 | feature_id[555].value <=<br>threshold=0.67006054520607     |
| node_130:<br>feature_name=cg08411881 | feature_id[3200].value <=<br>threshold=0.7572305798530579  |
| node_131:<br>feature_name=cg16636756 | feature_id[5414].value <=<br>threshold=0.15655579417943954 |
| Class: nodular fasciitis(NFA)        |                                                            |
|                                      |                                                            |
| Rules_151                            | passed counts:1                                            |
| node_0:<br>feature_name=cg11915444   | feature_id[4116].value ><br>threshold=0.3402601182460785   |
| node_10:<br>feature_name=cg12109728  | feature_id[4182].value ><br>threshold=0.7068270146846771   |
| node_20:<br>feature_name=cg10844382  | feature_id[3856].value ><br>threshold=0.5988894104957581   |
| node_24:<br>feature_name=cg00631702  | feature_id[943].value <=<br>threshold=0.37470583617687225  |
| node_25:<br>feature_name=cg07912144  | feature_id[3075].value ><br>threshold=0.5578519105911255   |
| node_29:<br>feature_name=cg24407065  | feature_id[388].value ><br>threshold=0.5364363789558411    |
| node_33:<br>feature_name=cg15275017  | feature_id[5069].value ><br>threshold=0.4538573920726776   |
| node_51:<br>feature_name=cg07281938  | feature_id[351].value ><br>threshold=0.7506992518901825    |
| node_73:<br>feature_name=cg17524821  | feature_id[5626].value ><br>threshold=0.4504699558019638   |
| node_75:<br>feature_name=cg02973735  | feature_id[1677].value ><br>threshold=0.29383400082588196  |
| node_77:<br>feature_name=cg23345038  | feature_id[7002].value ><br>threshold=0.6255057156085968   |
| node_79:<br>feature_name=cg17537493  | feature_id[5630].value ><br>threshold=0.5825372636318207   |

|                                      |                                                            |
|--------------------------------------|------------------------------------------------------------|
| node_85:<br>feature_name=cg12948116  | feature_id[4375].value <=<br>threshold=0.5658791363239288  |
| node_86:<br>feature_name=cg06038180  | feature_id[2529].value ><br>threshold=0.43877437710762024  |
| node_88:<br>feature_name=cg15720017  | feature_id[5175].value ><br>threshold=0.7009969055652618   |
| node_90:<br>feature_name=cg13070215  | feature_id[314].value <=<br>threshold=0.14645694941282272  |
| node_91:<br>feature_name=cg01014262  | feature_id[1082].value <=<br>threshold=0.5737917125225067  |
| node_92:<br>feature_name=cg16863382  | feature_id[5471].value ><br>threshold=0.7200668156147003   |
| node_102:<br>feature_name=cg06633739 | feature_id[2686].value <=<br>threshold=0.47115950286388397 |
| node_103:<br>feature_name=cg03861097 | feature_id[1943].value ><br>threshold=0.24196631461381912  |
| node_123:<br>feature_name=cg11468635 | feature_id[181].value ><br>threshold=0.9009453654289246    |
| Class: melanoma (MEL)                |                                                            |
|                                      |                                                            |
| Rules_152                            | passed counts:1                                            |
| node_0:<br>feature_name=cg11915444   | feature_id[4116].value ><br>threshold=0.3402601182460785   |
| node_10:<br>feature_name=cg12109728  | feature_id[4182].value ><br>threshold=0.7068270146846771   |
| node_20:<br>feature_name=cg10844382  | feature_id[3856].value ><br>threshold=0.5988894104957581   |
| node_24:<br>feature_name=cg00631702  | feature_id[943].value <=<br>threshold=0.37470583617687225  |
| node_25:<br>feature_name=cg07912144  | feature_id[3075].value ><br>threshold=0.5578519105911255   |
| node_29:<br>feature_name=cg24407065  | feature_id[388].value ><br>threshold=0.5364363789558411    |
| node_33:<br>feature_name=cg15275017  | feature_id[5069].value ><br>threshold=0.4538573920726776   |
| node_51:<br>feature_name=cg07281938  | feature_id[351].value ><br>threshold=0.7506992518901825    |
| node_73:<br>feature_name=cg17524821  | feature_id[5626].value ><br>threshold=0.4504699558019638   |
| node_75:<br>feature_name=cg02973735  | feature_id[1677].value ><br>threshold=0.29383400082588196  |
| node_77:<br>feature_name=cg23345038  | feature_id[7002].value ><br>threshold=0.6255057156085968   |

|                                         |                                                            |
|-----------------------------------------|------------------------------------------------------------|
| node_79:<br>feature_name=cg17537493     | feature_id[5630].value ><br>threshold=0.5825372636318207   |
| node_85:<br>feature_name=cg12948116     | feature_id[4375].value <=<br>threshold=0.5658791363239288  |
| node_86:<br>feature_name=cg06038180     | feature_id[2529].value ><br>threshold=0.43877437710762024  |
| node_88:<br>feature_name=cg15720017     | feature_id[5175].value ><br>threshold=0.7009969055652618   |
| node_90:<br>feature_name=cg13070215     | feature_id[314].value <=<br>threshold=0.14645694941282272  |
| node_91:<br>feature_name=cg01014262     | feature_id[1082].value <=<br>threshold=0.5737917125225067  |
| node_92:<br>feature_name=cg16863382     | feature_id[5471].value ><br>threshold=0.7200668156147003   |
| node_102:<br>feature_name=cg06633739    | feature_id[2686].value <=<br>threshold=0.47115950286388397 |
| node_103:<br>feature_name=cg03861097    | feature_id[1943].value <=<br>threshold=0.24196631461381912 |
| node_104:<br>feature_name=cg05145297    | feature_id[2285].value ><br>threshold=0.5227190256118774   |
| node_106:<br>feature_name=cg16797656    | feature_id[5460].value ><br>threshold=0.4279162883758545   |
| node_108:<br>feature_name=cg03606646    | feature_id[1871].value ><br>threshold=0.3077465817332268   |
| node_110:<br>feature_name=cg22046535    | feature_id[6692].value ><br>threshold=0.5624897629022598   |
| node_112:<br>feature_name=cg23723410    | feature_id[7092].value ><br>threshold=0.05077140033245087  |
| node_114:<br>feature_name=cg13728069    | feature_id[4600].value ><br>threshold=0.7036105096340179   |
| node_116:<br>feature_name=cg13086402    | feature_id[4402].value ><br>threshold=0.6883106529712677   |
| node_118:<br>feature_name=cg00825317    | feature_id[1007].value ><br>threshold=0.8662532269954681   |
| node_120:<br>feature_name=cg01066494    | feature_id[1103].value ><br>threshold=0.7783335149288177   |
| Class: undifferentiated sarcoma (USARC) |                                                            |
|                                         |                                                            |
| Rules_153                               | passed counts:1                                            |
| node_0:<br>feature_name=cg11915444      | feature_id[4116].value ><br>threshold=0.3402601182460785   |
| node_10:<br>feature_name=cg12109728     | feature_id[4182].value ><br>threshold=0.7068270146846771   |

|                                      |                                                            |
|--------------------------------------|------------------------------------------------------------|
| node_20:<br>feature_name=cg10844382  | feature_id[3856].value ><br>threshold=0.5988894104957581   |
| node_24:<br>feature_name=cg00631702  | feature_id[943].value <=<br>threshold=0.37470583617687225  |
| node_25:<br>feature_name=cg07912144  | feature_id[3075].value ><br>threshold=0.5578519105911255   |
| node_29:<br>feature_name=cg24407065  | feature_id[388].value ><br>threshold=0.5364363789558411    |
| node_33:<br>feature_name=cg15275017  | feature_id[5069].value ><br>threshold=0.4538573920726776   |
| node_51:<br>feature_name=cg07281938  | feature_id[351].value ><br>threshold=0.7506992518901825    |
| node_73:<br>feature_name=cg17524821  | feature_id[5626].value ><br>threshold=0.4504699558019638   |
| node_75:<br>feature_name=cg02973735  | feature_id[1677].value ><br>threshold=0.29383400082588196  |
| node_77:<br>feature_name=cg23345038  | feature_id[7002].value ><br>threshold=0.6255057156085968   |
| node_79:<br>feature_name=cg17537493  | feature_id[5630].value ><br>threshold=0.5825372636318207   |
| node_85:<br>feature_name=cg12948116  | feature_id[4375].value <=<br>threshold=0.5658791363239288  |
| node_86:<br>feature_name=cg06038180  | feature_id[2529].value ><br>threshold=0.43877437710762024  |
| node_88:<br>feature_name=cg15720017  | feature_id[5175].value ><br>threshold=0.7009969055652618   |
| node_90:<br>feature_name=cg13070215  | feature_id[314].value <=<br>threshold=0.14645694941282272  |
| node_91:<br>feature_name=cg01014262  | feature_id[1082].value <=<br>threshold=0.5737917125225067  |
| node_92:<br>feature_name=cg16863382  | feature_id[5471].value ><br>threshold=0.7200668156147003   |
| node_102:<br>feature_name=cg06633739 | feature_id[2686].value <=<br>threshold=0.47115950286388397 |
| node_103:<br>feature_name=cg03861097 | feature_id[1943].value <=<br>threshold=0.24196631461381912 |
| node_104:<br>feature_name=cg05145297 | feature_id[2285].value ><br>threshold=0.5227190256118774   |
| node_106:<br>feature_name=cg16797656 | feature_id[5460].value ><br>threshold=0.4279162883758545   |
| node_108:<br>feature_name=cg03606646 | feature_id[1871].value ><br>threshold=0.3077465817332268   |
| node_110:<br>feature_name=cg22046535 | feature_id[6692].value ><br>threshold=0.5624897629022598   |

|                                                         |                                                           |
|---------------------------------------------------------|-----------------------------------------------------------|
| node_112:<br>feature_name=cg23723410                    | feature_id[7092].value ><br>threshold=0.05077140033245087 |
| node_114:<br>feature_name=cg13728069                    | feature_id[4600].value ><br>threshold=0.7036105096340179  |
| node_116:<br>feature_name=cg13086402                    | feature_id[4402].value ><br>threshold=0.6883106529712677  |
| node_118:<br>feature_name=cg00825317                    | feature_id[1007].value ><br>threshold=0.8662532269954681  |
| node_120:<br>feature_name=cg01066494                    | feature_id[1103].value <=<br>threshold=0.7783335149288177 |
| Class: low-grade endometrial stromal sarcoma (ESS (LG)) |                                                           |
|                                                         |                                                           |
| Rules_154                                               | passed counts:1                                           |
| node_0:<br>feature_name=cg11915444                      | feature_id[4116].value ><br>threshold=0.3402601182460785  |
| node_10:<br>feature_name=cg12109728                     | feature_id[4182].value ><br>threshold=0.7068270146846771  |
| node_20:<br>feature_name=cg10844382                     | feature_id[3856].value ><br>threshold=0.5988894104957581  |
| node_24:<br>feature_name=cg00631702                     | feature_id[943].value <=<br>threshold=0.37470583617687225 |
| node_25:<br>feature_name=cg07912144                     | feature_id[3075].value ><br>threshold=0.5578519105911255  |
| node_29:<br>feature_name=cg24407065                     | feature_id[388].value ><br>threshold=0.5364363789558411   |
| node_33:<br>feature_name=cg15275017                     | feature_id[5069].value ><br>threshold=0.4538573920726776  |
| node_51:<br>feature_name=cg07281938                     | feature_id[351].value ><br>threshold=0.7506992518901825   |
| node_73:<br>feature_name=cg17524821                     | feature_id[5626].value ><br>threshold=0.4504699558019638  |
| node_75:<br>feature_name=cg02973735                     | feature_id[1677].value ><br>threshold=0.29383400082588196 |
| node_77:<br>feature_name=cg23345038                     | feature_id[7002].value ><br>threshold=0.6255057156085968  |
| node_79:<br>feature_name=cg17537493                     | feature_id[5630].value ><br>threshold=0.5825372636318207  |
| node_85:<br>feature_name=cg12948116                     | feature_id[4375].value <=<br>threshold=0.5658791363239288 |
| node_86:<br>feature_name=cg06038180                     | feature_id[2529].value ><br>threshold=0.43877437710762024 |
| node_88:<br>feature_name=cg15720017                     | feature_id[5175].value ><br>threshold=0.7009969055652618  |

|                                      |                                                            |
|--------------------------------------|------------------------------------------------------------|
| node_90:<br>feature_name=cg13070215  | feature_id[314].value <=<br>threshold=0.14645694941282272  |
| node_91:<br>feature_name=cg01014262  | feature_id[1082].value <=<br>threshold=0.5737917125225067  |
| node_92:<br>feature_name=cg16863382  | feature_id[5471].value ><br>threshold=0.7200668156147003   |
| node_102:<br>feature_name=cg06633739 | feature_id[2686].value <=<br>threshold=0.47115950286388397 |
| node_103:<br>feature_name=cg03861097 | feature_id[1943].value <=<br>threshold=0.24196631461381912 |
| node_104:<br>feature_name=cg05145297 | feature_id[2285].value ><br>threshold=0.5227190256118774   |
| node_106:<br>feature_name=cg16797656 | feature_id[5460].value ><br>threshold=0.4279162883758545   |
| node_108:<br>feature_name=cg03606646 | feature_id[1871].value ><br>threshold=0.3077465817332268   |
| node_110:<br>feature_name=cg22046535 | feature_id[6692].value ><br>threshold=0.5624897629022598   |
| node_112:<br>feature_name=cg23723410 | feature_id[7092].value ><br>threshold=0.05077140033245087  |
| node_114:<br>feature_name=cg13728069 | feature_id[4600].value ><br>threshold=0.7036105096340179   |
| node_116:<br>feature_name=cg13086402 | feature_id[4402].value ><br>threshold=0.6883106529712677   |
| node_118:<br>feature_name=cg00825317 | feature_id[1007].value <=<br>threshold=0.8662532269954681  |
| Class: chondroblastoma (CB)          |                                                            |
|                                      |                                                            |
| Rules_155                            | passed counts:1                                            |
| node_0:<br>feature_name=cg11915444   | feature_id[4116].value ><br>threshold=0.3402601182460785   |
| node_10:<br>feature_name=cg12109728  | feature_id[4182].value ><br>threshold=0.7068270146846771   |
| node_20:<br>feature_name=cg10844382  | feature_id[3856].value ><br>threshold=0.5988894104957581   |
| node_24:<br>feature_name=cg00631702  | feature_id[943].value <=<br>threshold=0.37470583617687225  |
| node_25:<br>feature_name=cg07912144  | feature_id[3075].value ><br>threshold=0.5578519105911255   |
| node_29:<br>feature_name=cg24407065  | feature_id[388].value ><br>threshold=0.5364363789558411    |
| node_33:<br>feature_name=cg15275017  | feature_id[5069].value ><br>threshold=0.4538573920726776   |

|                                                       |                                                            |
|-------------------------------------------------------|------------------------------------------------------------|
| node_51:<br>feature_name=cg07281938                   | feature_id[351].value ><br>threshold=0.7506992518901825    |
| node_73:<br>feature_name=cg17524821                   | feature_id[5626].value ><br>threshold=0.4504699558019638   |
| node_75:<br>feature_name=cg02973735                   | feature_id[1677].value ><br>threshold=0.29383400082588196  |
| node_77:<br>feature_name=cg23345038                   | feature_id[7002].value ><br>threshold=0.6255057156085968   |
| node_79:<br>feature_name=cg17537493                   | feature_id[5630].value ><br>threshold=0.5825372636318207   |
| node_85:<br>feature_name=cg12948116                   | feature_id[4375].value <=<br>threshold=0.5658791363239288  |
| node_86:<br>feature_name=cg06038180                   | feature_id[2529].value ><br>threshold=0.43877437710762024  |
| node_88:<br>feature_name=cg15720017                   | feature_id[5175].value ><br>threshold=0.7009969055652618   |
| node_90:<br>feature_name=cg13070215                   | feature_id[314].value <=<br>threshold=0.14645694941282272  |
| node_91:<br>feature_name=cg01014262                   | feature_id[1082].value <=<br>threshold=0.5737917125225067  |
| node_92:<br>feature_name=cg16863382                   | feature_id[5471].value ><br>threshold=0.7200668156147003   |
| node_102:<br>feature_name=cg06633739                  | feature_id[2686].value <=<br>threshold=0.47115950286388397 |
| node_103:<br>feature_name=cg03861097                  | feature_id[1943].value <=<br>threshold=0.24196631461381912 |
| node_104:<br>feature_name=cg05145297                  | feature_id[2285].value ><br>threshold=0.5227190256118774   |
| node_106:<br>feature_name=cg16797656                  | feature_id[5460].value ><br>threshold=0.4279162883758545   |
| node_108:<br>feature_name=cg03606646                  | feature_id[1871].value ><br>threshold=0.3077465817332268   |
| node_110:<br>feature_name=cg22046535                  | feature_id[6692].value ><br>threshold=0.5624897629022598   |
| node_112:<br>feature_name=cg23723410                  | feature_id[7092].value ><br>threshold=0.05077140033245087  |
| node_114:<br>feature_name=cg13728069                  | feature_id[4600].value ><br>threshold=0.7036105096340179   |
| node_116:<br>feature_name=cg13086402                  | feature_id[4402].value <=<br>threshold=0.6883106529712677  |
| Class: high-grade conventional osteosarcoma (OS (HG)) |                                                            |
|                                                       |                                                            |
| Rules_156                                             | passed counts:1                                            |



|                                      |                                                            |
|--------------------------------------|------------------------------------------------------------|
| node_0:<br>feature_name=cg11915444   | feature_id[4116].value ><br>threshold=0.3402601182460785   |
| node_10:<br>feature_name=cg12109728  | feature_id[4182].value ><br>threshold=0.7068270146846771   |
| node_20:<br>feature_name=cg10844382  | feature_id[3856].value ><br>threshold=0.5988894104957581   |
| node_24:<br>feature_name=cg00631702  | feature_id[943].value <=<br>threshold=0.37470583617687225  |
| node_25:<br>feature_name=cg07912144  | feature_id[3075].value ><br>threshold=0.5578519105911255   |
| node_29:<br>feature_name=cg24407065  | feature_id[388].value ><br>threshold=0.5364363789558411    |
| node_33:<br>feature_name=cg15275017  | feature_id[5069].value ><br>threshold=0.4538573920726776   |
| node_51:<br>feature_name=cg07281938  | feature_id[351].value ><br>threshold=0.7506992518901825    |
| node_73:<br>feature_name=cg17524821  | feature_id[5626].value ><br>threshold=0.4504699558019638   |
| node_75:<br>feature_name=cg02973735  | feature_id[1677].value ><br>threshold=0.29383400082588196  |
| node_77:<br>feature_name=cg23345038  | feature_id[7002].value ><br>threshold=0.6255057156085968   |
| node_79:<br>feature_name=cg17537493  | feature_id[5630].value ><br>threshold=0.5825372636318207   |
| node_85:<br>feature_name=cg12948116  | feature_id[4375].value <=<br>threshold=0.5658791363239288  |
| node_86:<br>feature_name=cg06038180  | feature_id[2529].value ><br>threshold=0.43877437710762024  |
| node_88:<br>feature_name=cg15720017  | feature_id[5175].value ><br>threshold=0.7009969055652618   |
| node_90:<br>feature_name=cg13070215  | feature_id[314].value <=<br>threshold=0.14645694941282272  |
| node_91:<br>feature_name=cg01014262  | feature_id[1082].value <=<br>threshold=0.5737917125225067  |
| node_92:<br>feature_name=cg16863382  | feature_id[5471].value ><br>threshold=0.7200668156147003   |
| node_102:<br>feature_name=cg06633739 | feature_id[2686].value <=<br>threshold=0.47115950286388397 |
| node_103:<br>feature_name=cg03861097 | feature_id[1943].value <=<br>threshold=0.24196631461381912 |
| node_104:<br>feature_name=cg05145297 | feature_id[2285].value ><br>threshold=0.5227190256118774   |
| node_106:<br>feature_name=cg16797656 | feature_id[5460].value ><br>threshold=0.4279162883758545   |

|                                                         |                                                           |
|---------------------------------------------------------|-----------------------------------------------------------|
| node_108:<br>feature_name=cg03606646                    | feature_id[1871].value ><br>threshold=0.3077465817332268  |
| node_110:<br>feature_name=cg22046535                    | feature_id[6692].value ><br>threshold=0.5624897629022598  |
| node_112:<br>feature_name=cg23723410                    | feature_id[7092].value ><br>threshold=0.05077140033245087 |
| node_114:<br>feature_name=cg13728069                    | feature_id[4600].value <=<br>threshold=0.7036105096340179 |
| Class: malignant peripheral nerve sheath tumour (MPNST) |                                                           |
|                                                         |                                                           |
| Rules_157                                               | passed counts:1                                           |
| node_0:<br>feature_name=cg11915444                      | feature_id[4116].value ><br>threshold=0.3402601182460785  |
| node_10:<br>feature_name=cg12109728                     | feature_id[4182].value ><br>threshold=0.7068270146846771  |
| node_20:<br>feature_name=cg10844382                     | feature_id[3856].value ><br>threshold=0.5988894104957581  |
| node_24:<br>feature_name=cg00631702                     | feature_id[943].value <=<br>threshold=0.37470583617687225 |
| node_25:<br>feature_name=cg07912144                     | feature_id[3075].value ><br>threshold=0.5578519105911255  |
| node_29:<br>feature_name=cg24407065                     | feature_id[388].value ><br>threshold=0.5364363789558411   |
| node_33:<br>feature_name=cg15275017                     | feature_id[5069].value ><br>threshold=0.4538573920726776  |
| node_51:<br>feature_name=cg07281938                     | feature_id[351].value ><br>threshold=0.7506992518901825   |
| node_73:<br>feature_name=cg17524821                     | feature_id[5626].value ><br>threshold=0.4504699558019638  |
| node_75:<br>feature_name=cg02973735                     | feature_id[1677].value ><br>threshold=0.29383400082588196 |
| node_77:<br>feature_name=cg23345038                     | feature_id[7002].value ><br>threshold=0.6255057156085968  |
| node_79:<br>feature_name=cg17537493                     | feature_id[5630].value ><br>threshold=0.5825372636318207  |
| node_85:<br>feature_name=cg12948116                     | feature_id[4375].value <=<br>threshold=0.5658791363239288 |
| node_86:<br>feature_name=cg06038180                     | feature_id[2529].value ><br>threshold=0.43877437710762024 |
| node_88:<br>feature_name=cg15720017                     | feature_id[5175].value ><br>threshold=0.7009969055652618  |
| node_90:<br>feature_name=cg13070215                     | feature_id[314].value <=<br>threshold=0.14645694941282272 |

|                                                   |                                                            |
|---------------------------------------------------|------------------------------------------------------------|
| node_91:<br>feature_name=cg01014262               | feature_id[1082].value <=<br>threshold=0.5737917125225067  |
| node_92:<br>feature_name=cg16863382               | feature_id[5471].value ><br>threshold=0.7200668156147003   |
| node_102:<br>feature_name=cg06633739              | feature_id[2686].value <=<br>threshold=0.47115950286388397 |
| node_103:<br>feature_name=cg03861097              | feature_id[1943].value <=<br>threshold=0.24196631461381912 |
| node_104:<br>feature_name=cg05145297              | feature_id[2285].value ><br>threshold=0.5227190256118774   |
| node_106:<br>feature_name=cg16797656              | feature_id[5460].value ><br>threshold=0.4279162883758545   |
| node_108:<br>feature_name=cg03606646              | feature_id[1871].value ><br>threshold=0.3077465817332268   |
| node_110:<br>feature_name=cg22046535              | feature_id[6692].value ><br>threshold=0.5624897629022598   |
| node_112:<br>feature_name=cg23723410              | feature_id[7092].value <=<br>threshold=0.05077140033245087 |
| Class: extraskeletal myxoid chondrosarcoma (EMCS) |                                                            |
|                                                   |                                                            |
| Rules_158                                         | passed counts:1                                            |
| node_0:<br>feature_name=cg11915444                | feature_id[4116].value ><br>threshold=0.3402601182460785   |
| node_10:<br>feature_name=cg12109728               | feature_id[4182].value ><br>threshold=0.7068270146846771   |
| node_20:<br>feature_name=cg10844382               | feature_id[3856].value ><br>threshold=0.5988894104957581   |
| node_24:<br>feature_name=cg00631702               | feature_id[943].value <=<br>threshold=0.37470583617687225  |
| node_25:<br>feature_name=cg07912144               | feature_id[3075].value ><br>threshold=0.5578519105911255   |
| node_29:<br>feature_name=cg24407065               | feature_id[388].value ><br>threshold=0.5364363789558411    |
| node_33:<br>feature_name=cg15275017               | feature_id[5069].value ><br>threshold=0.4538573920726776   |
| node_51:<br>feature_name=cg07281938               | feature_id[351].value ><br>threshold=0.7506992518901825    |
| node_73:<br>feature_name=cg17524821               | feature_id[5626].value ><br>threshold=0.4504699558019638   |
| node_75:<br>feature_name=cg02973735               | feature_id[1677].value ><br>threshold=0.29383400082588196  |
| node_77:<br>feature_name=cg23345038               | feature_id[7002].value ><br>threshold=0.6255057156085968   |

|                                      |                                                            |
|--------------------------------------|------------------------------------------------------------|
| node_79:<br>feature_name=cg17537493  | feature_id[5630].value ><br>threshold=0.5825372636318207   |
| node_85:<br>feature_name=cg12948116  | feature_id[4375].value <=<br>threshold=0.5658791363239288  |
| node_86:<br>feature_name=cg06038180  | feature_id[2529].value ><br>threshold=0.43877437710762024  |
| node_88:<br>feature_name=cg15720017  | feature_id[5175].value ><br>threshold=0.7009969055652618   |
| node_90:<br>feature_name=cg13070215  | feature_id[314].value <=<br>threshold=0.14645694941282272  |
| node_91:<br>feature_name=cg01014262  | feature_id[1082].value <=<br>threshold=0.5737917125225067  |
| node_92:<br>feature_name=cg16863382  | feature_id[5471].value ><br>threshold=0.7200668156147003   |
| node_102:<br>feature_name=cg06633739 | feature_id[2686].value <=<br>threshold=0.47115950286388397 |
| node_103:<br>feature_name=cg03861097 | feature_id[1943].value <=<br>threshold=0.24196631461381912 |
| node_104:<br>feature_name=cg05145297 | feature_id[2285].value ><br>threshold=0.5227190256118774   |
| node_106:<br>feature_name=cg16797656 | feature_id[5460].value ><br>threshold=0.4279162883758545   |
| node_108:<br>feature_name=cg03606646 | feature_id[1871].value ><br>threshold=0.3077465817332268   |
| node_110:<br>feature_name=cg22046535 | feature_id[6692].value <=<br>threshold=0.5624897629022598  |
| Class: melanoma (MEL)                |                                                            |
|                                      |                                                            |
| Rules_159                            | passed counts:1                                            |
| node_0:<br>feature_name=cg11915444   | feature_id[4116].value ><br>threshold=0.3402601182460785   |
| node_10:<br>feature_name=cg12109728  | feature_id[4182].value ><br>threshold=0.7068270146846771   |
| node_20:<br>feature_name=cg10844382  | feature_id[3856].value ><br>threshold=0.5988894104957581   |
| node_24:<br>feature_name=cg00631702  | feature_id[943].value <=<br>threshold=0.37470583617687225  |
| node_25:<br>feature_name=cg07912144  | feature_id[3075].value ><br>threshold=0.5578519105911255   |
| node_29:<br>feature_name=cg24407065  | feature_id[388].value ><br>threshold=0.5364363789558411    |
| node_33:<br>feature_name=cg15275017  | feature_id[5069].value ><br>threshold=0.4538573920726776   |

|                                      |                                                            |
|--------------------------------------|------------------------------------------------------------|
| node_51:<br>feature_name=cg07281938  | feature_id[351].value ><br>threshold=0.7506992518901825    |
| node_73:<br>feature_name=cg17524821  | feature_id[5626].value ><br>threshold=0.4504699558019638   |
| node_75:<br>feature_name=cg02973735  | feature_id[1677].value ><br>threshold=0.29383400082588196  |
| node_77:<br>feature_name=cg23345038  | feature_id[7002].value ><br>threshold=0.6255057156085968   |
| node_79:<br>feature_name=cg17537493  | feature_id[5630].value ><br>threshold=0.5825372636318207   |
| node_85:<br>feature_name=cg12948116  | feature_id[4375].value <=<br>threshold=0.5658791363239288  |
| node_86:<br>feature_name=cg06038180  | feature_id[2529].value ><br>threshold=0.43877437710762024  |
| node_88:<br>feature_name=cg15720017  | feature_id[5175].value ><br>threshold=0.7009969055652618   |
| node_90:<br>feature_name=cg13070215  | feature_id[314].value <=<br>threshold=0.14645694941282272  |
| node_91:<br>feature_name=cg01014262  | feature_id[1082].value <=<br>threshold=0.5737917125225067  |
| node_92:<br>feature_name=cg16863382  | feature_id[5471].value ><br>threshold=0.7200668156147003   |
| node_102:<br>feature_name=cg06633739 | feature_id[2686].value <=<br>threshold=0.47115950286388397 |
| node_103:<br>feature_name=cg03861097 | feature_id[1943].value <=<br>threshold=0.24196631461381912 |
| node_104:<br>feature_name=cg05145297 | feature_id[2285].value ><br>threshold=0.5227190256118774   |
| node_106:<br>feature_name=cg16797656 | feature_id[5460].value ><br>threshold=0.4279162883758545   |
| node_108:<br>feature_name=cg03606646 | feature_id[1871].value <=<br>threshold=0.3077465817332268  |
| Class: leiomyosarcoma (LMS)          |                                                            |
|                                      |                                                            |
| Rules_160                            | passed counts:1                                            |
| node_0:<br>feature_name=cg11915444   | feature_id[4116].value ><br>threshold=0.3402601182460785   |
| node_10:<br>feature_name=cg12109728  | feature_id[4182].value ><br>threshold=0.7068270146846771   |
| node_20:<br>feature_name=cg10844382  | feature_id[3856].value ><br>threshold=0.5988894104957581   |
| node_24:<br>feature_name=cg00631702  | feature_id[943].value <=<br>threshold=0.37470583617687225  |

|                                     |                                                           |
|-------------------------------------|-----------------------------------------------------------|
| node_25:<br>feature_name=cg07912144 | feature_id[3075].value ><br>threshold=0.5578519105911255  |
| node_29:<br>feature_name=cg24407065 | feature_id[388].value ><br>threshold=0.5364363789558411   |
| node_33:<br>feature_name=cg15275017 | feature_id[5069].value ><br>threshold=0.4538573920726776  |
| node_51:<br>feature_name=cg07281938 | feature_id[351].value ><br>threshold=0.7506992518901825   |
| node_73:<br>feature_name=cg17524821 | feature_id[5626].value ><br>threshold=0.4504699558019638  |
| node_75:<br>feature_name=cg02973735 | feature_id[1677].value ><br>threshold=0.29383400082588196 |
| node_77:<br>feature_name=cg23345038 | feature_id[7002].value ><br>threshold=0.6255057156085968  |
| node_79:<br>feature_name=cg17537493 | feature_id[5630].value ><br>threshold=0.5825372636318207  |
| node_85:<br>feature_name=cg12948116 | feature_id[4375].value <=<br>threshold=0.5658791363239288 |
| node_86:<br>feature_name=cg06038180 | feature_id[2529].value ><br>threshold=0.43877437710762024 |
| node_88:<br>feature_name=cg15720017 | feature_id[5175].value ><br>threshold=0.7009969055652618  |
| node_90:<br>feature_name=cg13070215 | feature_id[314].value <=<br>threshold=0.14645694941282272 |
| node_91:<br>feature_name=cg01014262 | feature_id[1082].value <=<br>threshold=0.5737917125225067 |
| node_92:<br>feature_name=cg16863382 | feature_id[5471].value <=<br>threshold=0.7200668156147003 |
| node_93:<br>feature_name=cg18601229 | feature_id[5883].value <=<br>threshold=0.7762220203876495 |
| node_94:<br>feature_name=cg04819180 | feature_id[2191].value <=<br>threshold=0.8672285974025726 |
| node_95:<br>feature_name=cg09370702 | feature_id[3456].value ><br>threshold=0.8020930886268616  |
| node_97:<br>feature_name=cg08625990 | feature_id[3258].value ><br>threshold=0.8129918575286865  |
| Class: rhabdomyosarcoma (RMS)       |                                                           |
|                                     |                                                           |
| Rules_161                           | passed counts:1                                           |
| node_0:<br>feature_name=cg11915444  | feature_id[4116].value ><br>threshold=0.3402601182460785  |
| node_10:<br>feature_name=cg12109728 | feature_id[4182].value ><br>threshold=0.7068270146846771  |

|                                                |                                                           |
|------------------------------------------------|-----------------------------------------------------------|
| node_20:<br>feature_name=cg10844382            | feature_id[3856].value ><br>threshold=0.5988894104957581  |
| node_24:<br>feature_name=cg00631702            | feature_id[943].value <=<br>threshold=0.37470583617687225 |
| node_25:<br>feature_name=cg07912144            | feature_id[3075].value ><br>threshold=0.5578519105911255  |
| node_29:<br>feature_name=cg24407065            | feature_id[388].value ><br>threshold=0.5364363789558411   |
| node_33:<br>feature_name=cg15275017            | feature_id[5069].value ><br>threshold=0.4538573920726776  |
| node_51:<br>feature_name=cg07281938            | feature_id[351].value ><br>threshold=0.7506992518901825   |
| node_73:<br>feature_name=cg17524821            | feature_id[5626].value ><br>threshold=0.4504699558019638  |
| node_75:<br>feature_name=cg02973735            | feature_id[1677].value ><br>threshold=0.29383400082588196 |
| node_77:<br>feature_name=cg23345038            | feature_id[7002].value ><br>threshold=0.6255057156085968  |
| node_79:<br>feature_name=cg17537493            | feature_id[5630].value <=<br>threshold=0.5825372636318207 |
| node_80:<br>feature_name=cg07990390            | feature_id[515].value ><br>threshold=0.7988054752349854   |
| node_82:<br>feature_name=cg10006956            | feature_id[3627].value ><br>threshold=0.9051482081413269  |
| Class: epithelioid haemangioendothelioma (EHE) |                                                           |
|                                                |                                                           |
| Rules_162                                      | passed counts:1                                           |
| node_0:<br>feature_name=cg11915444             | feature_id[4116].value ><br>threshold=0.3402601182460785  |
| node_10:<br>feature_name=cg12109728            | feature_id[4182].value ><br>threshold=0.7068270146846771  |
| node_20:<br>feature_name=cg10844382            | feature_id[3856].value ><br>threshold=0.5988894104957581  |
| node_24:<br>feature_name=cg00631702            | feature_id[943].value <=<br>threshold=0.37470583617687225 |
| node_25:<br>feature_name=cg07912144            | feature_id[3075].value ><br>threshold=0.5578519105911255  |
| node_29:<br>feature_name=cg24407065            | feature_id[388].value ><br>threshold=0.5364363789558411   |
| node_33:<br>feature_name=cg15275017            | feature_id[5069].value ><br>threshold=0.4538573920726776  |
| node_51:<br>feature_name=cg07281938            | feature_id[351].value <=<br>threshold=0.7506992518901825  |

|                                               |                                                            |
|-----------------------------------------------|------------------------------------------------------------|
| node_52:<br>feature_name=cg21189849           | feature_id[6504].value ><br>threshold=0.7545044124126434   |
| node_58:<br>feature_name=cg02867857           | feature_id[1644].value ><br>threshold=0.5450765490531921   |
| node_60:<br>feature_name=cg00863893           | feature_id[1017].value <=<br>threshold=0.5313664376735687  |
| node_61:<br>feature_name=cg22397446           | feature_id[6765].value <=<br>threshold=0.02860488835722208 |
| node_62:<br>feature_name=cg19781117           | feature_id[6171].value ><br>threshold=0.6593038737773895   |
| node_64:<br>feature_name=cg03385114           | feature_id[1805].value ><br>threshold=0.566239520907402    |
| node_66:<br>feature_name=cg09043524           | feature_id[3372].value ><br>threshold=0.7512756288051605   |
| node_68:<br>feature_name=cg04627183           | feature_id[2137].value ><br>threshold=0.8674522340297699   |
| Class: angiomatoid fibrous histiocytoma (AFH) |                                                            |
|                                               |                                                            |
| Rules_163                                     | passed counts:1                                            |
| node_0:<br>feature_name=cg11915444            | feature_id[4116].value ><br>threshold=0.3402601182460785   |
| node_10:<br>feature_name=cg12109728           | feature_id[4182].value ><br>threshold=0.7068270146846771   |
| node_20:<br>feature_name=cg10844382           | feature_id[3856].value ><br>threshold=0.5988894104957581   |
| node_24:<br>feature_name=cg00631702           | feature_id[943].value <=<br>threshold=0.37470583617687225  |
| node_25:<br>feature_name=cg07912144           | feature_id[3075].value ><br>threshold=0.5578519105911255   |
| node_29:<br>feature_name=cg24407065           | feature_id[388].value ><br>threshold=0.5364363789558411    |
| node_33:<br>feature_name=cg15275017           | feature_id[5069].value ><br>threshold=0.4538573920726776   |
| node_51:<br>feature_name=cg07281938           | feature_id[351].value <=<br>threshold=0.7506992518901825   |
| node_52:<br>feature_name=cg21189849           | feature_id[6504].value ><br>threshold=0.7545044124126434   |
| node_58:<br>feature_name=cg02867857           | feature_id[1644].value ><br>threshold=0.5450765490531921   |
| node_60:<br>feature_name=cg00863893           | feature_id[1017].value <=<br>threshold=0.5313664376735687  |
| node_61:<br>feature_name=cg22397446           | feature_id[6765].value <=<br>threshold=0.02860488835722208 |



|                                                  |                                                            |
|--------------------------------------------------|------------------------------------------------------------|
| node_62:<br>feature_name=cg19781117              | feature_id[6171].value ><br>threshold=0.6593038737773895   |
| node_64:<br>feature_name=cg03385114              | feature_id[1805].value ><br>threshold=0.566239520907402    |
| node_66:<br>feature_name=cg09043524              | feature_id[3372].value ><br>threshold=0.7512756288051605   |
| node_68:<br>feature_name=cg04627183              | feature_id[2137].value <=<br>threshold=0.8674522340297699  |
| Class: angioleiomyoma (ALMO)/myopericytoma (MPC) |                                                            |
|                                                  |                                                            |
| Rules_164                                        | passed counts:1                                            |
| node_0:<br>feature_name=cg11915444               | feature_id[4116].value ><br>threshold=0.3402601182460785   |
| node_10:<br>feature_name=cg12109728              | feature_id[4182].value ><br>threshold=0.7068270146846771   |
| node_20:<br>feature_name=cg10844382              | feature_id[3856].value ><br>threshold=0.5988894104957581   |
| node_24:<br>feature_name=cg00631702              | feature_id[943].value <=<br>threshold=0.37470583617687225  |
| node_25:<br>feature_name=cg07912144              | feature_id[3075].value ><br>threshold=0.5578519105911255   |
| node_29:<br>feature_name=cg24407065              | feature_id[388].value ><br>threshold=0.5364363789558411    |
| node_33:<br>feature_name=cg15275017              | feature_id[5069].value ><br>threshold=0.4538573920726776   |
| node_51:<br>feature_name=cg07281938              | feature_id[351].value <=<br>threshold=0.7506992518901825   |
| node_52:<br>feature_name=cg21189849              | feature_id[6504].value ><br>threshold=0.7545044124126434   |
| node_58:<br>feature_name=cg02867857              | feature_id[1644].value ><br>threshold=0.5450765490531921   |
| node_60:<br>feature_name=cg00863893              | feature_id[1017].value <=<br>threshold=0.5313664376735687  |
| node_61:<br>feature_name=cg22397446              | feature_id[6765].value <=<br>threshold=0.02860488835722208 |
| node_62:<br>feature_name=cg19781117              | feature_id[6171].value ><br>threshold=0.6593038737773895   |
| node_64:<br>feature_name=cg03385114              | feature_id[1805].value ><br>threshold=0.566239520907402    |
| node_66:<br>feature_name=cg09043524              | feature_id[3372].value <=<br>threshold=0.7512756288051605  |
| Class: chondroblastoma (CB)                      |                                                            |
|                                                  |                                                            |

|                                     |                                                            |
|-------------------------------------|------------------------------------------------------------|
| Rules_165                           | passed counts:1                                            |
| node_0:<br>feature_name=cg11915444  | feature_id[4116].value ><br>threshold=0.3402601182460785   |
| node_10:<br>feature_name=cg12109728 | feature_id[4182].value ><br>threshold=0.7068270146846771   |
| node_20:<br>feature_name=cg10844382 | feature_id[3856].value ><br>threshold=0.5988894104957581   |
| node_24:<br>feature_name=cg00631702 | feature_id[943].value <=<br>threshold=0.37470583617687225  |
| node_25:<br>feature_name=cg07912144 | feature_id[3075].value ><br>threshold=0.5578519105911255   |
| node_29:<br>feature_name=cg24407065 | feature_id[388].value ><br>threshold=0.5364363789558411    |
| node_33:<br>feature_name=cg15275017 | feature_id[5069].value ><br>threshold=0.4538573920726776   |
| node_51:<br>feature_name=cg07281938 | feature_id[351].value <=<br>threshold=0.7506992518901825   |
| node_52:<br>feature_name=cg21189849 | feature_id[6504].value ><br>threshold=0.7545044124126434   |
| node_58:<br>feature_name=cg02867857 | feature_id[1644].value ><br>threshold=0.5450765490531921   |
| node_60:<br>feature_name=cg00863893 | feature_id[1017].value <=<br>threshold=0.5313664376735687  |
| node_61:<br>feature_name=cg22397446 | feature_id[6765].value <=<br>threshold=0.02860488835722208 |
| node_62:<br>feature_name=cg19781117 | feature_id[6171].value ><br>threshold=0.6593038737773895   |
| node_64:<br>feature_name=cg03385114 | feature_id[1805].value <=<br>threshold=0.566239520907402   |
| Class: osteoblastoma (OB)           |                                                            |
|                                     |                                                            |
| Rules_166                           | passed counts:1                                            |
| node_0:<br>feature_name=cg11915444  | feature_id[4116].value ><br>threshold=0.3402601182460785   |
| node_10:<br>feature_name=cg12109728 | feature_id[4182].value ><br>threshold=0.7068270146846771   |
| node_20:<br>feature_name=cg10844382 | feature_id[3856].value ><br>threshold=0.5988894104957581   |
| node_24:<br>feature_name=cg00631702 | feature_id[943].value <=<br>threshold=0.37470583617687225  |
| node_25:<br>feature_name=cg07912144 | feature_id[3075].value ><br>threshold=0.5578519105911255   |

|                                      |                                                            |
|--------------------------------------|------------------------------------------------------------|
| node_29:<br>feature_name=cg24407065  | feature_id[388].value ><br>threshold=0.5364363789558411    |
| node_33:<br>feature_name=cg15275017  | feature_id[5069].value ><br>threshold=0.4538573920726776   |
| node_51:<br>feature_name=cg07281938  | feature_id[351].value <=<br>threshold=0.7506992518901825   |
| node_52:<br>feature_name=cg21189849  | feature_id[6504].value ><br>threshold=0.7545044124126434   |
| node_58:<br>feature_name=cg02867857  | feature_id[1644].value ><br>threshold=0.5450765490531921   |
| node_60:<br>feature_name=cg00863893  | feature_id[1017].value <=<br>threshold=0.5313664376735687  |
| node_61:<br>feature_name=cg22397446  | feature_id[6765].value <=<br>threshold=0.02860488835722208 |
| node_62:<br>feature_name=cg19781117  | feature_id[6171].value <=<br>threshold=0.6593038737773895  |
| Class: solitary fibrous tumour (SFT) |                                                            |
|                                      |                                                            |
| Rules_167                            | passed counts:1                                            |
| node_0:<br>feature_name=cg11915444   | feature_id[4116].value ><br>threshold=0.3402601182460785   |
| node_10:<br>feature_name=cg12109728  | feature_id[4182].value ><br>threshold=0.7068270146846771   |
| node_20:<br>feature_name=cg10844382  | feature_id[3856].value ><br>threshold=0.5988894104957581   |
| node_24:<br>feature_name=cg00631702  | feature_id[943].value <=<br>threshold=0.37470583617687225  |
| node_25:<br>feature_name=cg07912144  | feature_id[3075].value ><br>threshold=0.5578519105911255   |
| node_29:<br>feature_name=cg24407065  | feature_id[388].value ><br>threshold=0.5364363789558411    |
| node_33:<br>feature_name=cg15275017  | feature_id[5069].value ><br>threshold=0.4538573920726776   |
| node_51:<br>feature_name=cg07281938  | feature_id[351].value <=<br>threshold=0.7506992518901825   |
| node_52:<br>feature_name=cg21189849  | feature_id[6504].value <=<br>threshold=0.7545044124126434  |
| node_53:<br>feature_name=cg11717552  | feature_id[4060].value <=<br>threshold=0.8407479226589203  |
| node_54:<br>feature_name=cg07043952  | feature_id[2823].value <=<br>threshold=0.8715284764766693  |
| Class: fibrous dysplasia (FDY)       |                                                            |
|                                      |                                                            |

|                                                  |                                                           |
|--------------------------------------------------|-----------------------------------------------------------|
| Rules_168                                        | passed counts:1                                           |
| node_0:<br>feature_name=cg11915444               | feature_id[4116].value ><br>threshold=0.3402601182460785  |
| node_10:<br>feature_name=cg12109728              | feature_id[4182].value ><br>threshold=0.7068270146846771  |
| node_20:<br>feature_name=cg10844382              | feature_id[3856].value ><br>threshold=0.5988894104957581  |
| node_24:<br>feature_name=cg00631702              | feature_id[943].value <=<br>threshold=0.37470583617687225 |
| node_25:<br>feature_name=cg07912144              | feature_id[3075].value ><br>threshold=0.5578519105911255  |
| node_29:<br>feature_name=cg24407065              | feature_id[388].value ><br>threshold=0.5364363789558411   |
| node_33:<br>feature_name=cg15275017              | feature_id[5069].value <=<br>threshold=0.4538573920726776 |
| node_34:<br>feature_name=cg08236537              | feature_id[3160].value ><br>threshold=0.4830351173877716  |
| node_46:<br>feature_name=cg13287523              | feature_id[632].value <=<br>threshold=0.6652203798294067  |
| node_47:<br>feature_name=cg11103999              | feature_id[3923].value ><br>threshold=0.8052912056446075  |
| Class: angioleiomyoma (ALMO)/myopericytoma (MPC) |                                                           |
|                                                  |                                                           |
| Rules_169                                        | passed counts:1                                           |
| node_0:<br>feature_name=cg11915444               | feature_id[4116].value ><br>threshold=0.3402601182460785  |
| node_10:<br>feature_name=cg12109728              | feature_id[4182].value ><br>threshold=0.7068270146846771  |
| node_20:<br>feature_name=cg10844382              | feature_id[3856].value ><br>threshold=0.5988894104957581  |
| node_24:<br>feature_name=cg00631702              | feature_id[943].value <=<br>threshold=0.37470583617687225 |
| node_25:<br>feature_name=cg07912144              | feature_id[3075].value ><br>threshold=0.5578519105911255  |
| node_29:<br>feature_name=cg24407065              | feature_id[388].value ><br>threshold=0.5364363789558411   |
| node_33:<br>feature_name=cg15275017              | feature_id[5069].value <=<br>threshold=0.4538573920726776 |
| node_34:<br>feature_name=cg08236537              | feature_id[3160].value ><br>threshold=0.4830351173877716  |
| node_46:<br>feature_name=cg13287523              | feature_id[632].value <=<br>threshold=0.6652203798294067  |

|                                                 |                                                           |
|-------------------------------------------------|-----------------------------------------------------------|
| node_47:<br>feature_name=cg11103999             | feature_id[3923].value <=<br>threshold=0.8052912056446075 |
| Class: undifferentiated sarcoma (USARC)         |                                                           |
|                                                 |                                                           |
| Rules_170                                       | passed counts:1                                           |
| node_0:<br>feature_name=cg11915444              | feature_id[4116].value ><br>threshold=0.3402601182460785  |
| node_10:<br>feature_name=cg12109728             | feature_id[4182].value ><br>threshold=0.7068270146846771  |
| node_20:<br>feature_name=cg10844382             | feature_id[3856].value ><br>threshold=0.5988894104957581  |
| node_24:<br>feature_name=cg00631702             | feature_id[943].value <=<br>threshold=0.37470583617687225 |
| node_25:<br>feature_name=cg07912144             | feature_id[3075].value ><br>threshold=0.5578519105911255  |
| node_29:<br>feature_name=cg24407065             | feature_id[388].value ><br>threshold=0.5364363789558411   |
| node_33:<br>feature_name=cg15275017             | feature_id[5069].value <=<br>threshold=0.4538573920726776 |
| node_34:<br>feature_name=cg08236537             | feature_id[3160].value <=<br>threshold=0.4830351173877716 |
| node_35:<br>feature_name=cg21591452             | feature_id[6603].value <=<br>threshold=0.878025621175766  |
| node_36:<br>feature_name=cg07368061             | feature_id[2933].value <=<br>threshold=0.6850627958774567 |
| node_37:<br>feature_name=cg21562750             | feature_id[6600].value ><br>threshold=0.680396169424057   |
| node_39:<br>feature_name=cg09268338             | feature_id[3430].value ><br>threshold=0.851186990737915   |
| node_41:<br>feature_name=cg10507281             | feature_id[3759].value ><br>threshold=0.928876131772995   |
| Class: sclerosing epithelioid fibrosarcoma(SEF) |                                                           |
|                                                 |                                                           |
| Rules_171                                       | passed counts:1                                           |
| node_0:<br>feature_name=cg11915444              | feature_id[4116].value ><br>threshold=0.3402601182460785  |
| node_10:<br>feature_name=cg12109728             | feature_id[4182].value ><br>threshold=0.7068270146846771  |
| node_20:<br>feature_name=cg10844382             | feature_id[3856].value ><br>threshold=0.5988894104957581  |
| node_24:<br>feature_name=cg00631702             | feature_id[943].value <=<br>threshold=0.37470583617687225 |

|                                               |                                                           |
|-----------------------------------------------|-----------------------------------------------------------|
| node_25:<br>feature_name=cg07912144           | feature_id[3075].value ><br>threshold=0.5578519105911255  |
| node_29:<br>feature_name=cg24407065           | feature_id[388].value ><br>threshold=0.5364363789558411   |
| node_33:<br>feature_name=cg15275017           | feature_id[5069].value <=<br>threshold=0.4538573920726776 |
| node_34:<br>feature_name=cg08236537           | feature_id[3160].value <=<br>threshold=0.4830351173877716 |
| node_35:<br>feature_name=cg21591452           | feature_id[6603].value <=<br>threshold=0.878025621175766  |
| node_36:<br>feature_name=cg07368061           | feature_id[2933].value <=<br>threshold=0.6850627958774567 |
| node_37:<br>feature_name=cg21562750           | feature_id[6600].value ><br>threshold=0.680396169424057   |
| node_39:<br>feature_name=cg09268338           | feature_id[3430].value ><br>threshold=0.851186990737915   |
| node_41:<br>feature_name=cg10507281           | feature_id[3759].value <=<br>threshold=0.928876131772995  |
| Class: embryonal rhabdomyosarcoma (RMS (EMB)) |                                                           |
|                                               |                                                           |
| Rules_172                                     | passed counts:1                                           |
| node_0:<br>feature_name=cg11915444            | feature_id[4116].value ><br>threshold=0.3402601182460785  |
| node_10:<br>feature_name=cg12109728           | feature_id[4182].value ><br>threshold=0.7068270146846771  |
| node_20:<br>feature_name=cg10844382           | feature_id[3856].value ><br>threshold=0.5988894104957581  |
| node_24:<br>feature_name=cg00631702           | feature_id[943].value <=<br>threshold=0.37470583617687225 |
| node_25:<br>feature_name=cg07912144           | feature_id[3075].value ><br>threshold=0.5578519105911255  |
| node_29:<br>feature_name=cg24407065           | feature_id[388].value ><br>threshold=0.5364363789558411   |
| node_33:<br>feature_name=cg15275017           | feature_id[5069].value <=<br>threshold=0.4538573920726776 |
| node_34:<br>feature_name=cg08236537           | feature_id[3160].value <=<br>threshold=0.4830351173877716 |
| node_35:<br>feature_name=cg21591452           | feature_id[6603].value <=<br>threshold=0.878025621175766  |
| node_36:<br>feature_name=cg07368061           | feature_id[2933].value <=<br>threshold=0.6850627958774567 |
| node_37:<br>feature_name=cg21562750           | feature_id[6600].value ><br>threshold=0.680396169424057   |

|                                                       |                                                            |
|-------------------------------------------------------|------------------------------------------------------------|
| node_39:<br>feature_name=cg09268338                   | feature_id[3430].value <=<br>threshold=0.851186990737915   |
| Class: high-grade conventional osteosarcoma (OS (HG)) |                                                            |
|                                                       |                                                            |
| Rules_173                                             | passed counts:1                                            |
| node_0:<br>feature_name=cg11915444                    | feature_id[4116].value ><br>threshold=0.3402601182460785   |
| node_10:<br>feature_name=cg12109728                   | feature_id[4182].value ><br>threshold=0.7068270146846771   |
| node_20:<br>feature_name=cg10844382                   | feature_id[3856].value ><br>threshold=0.5988894104957581   |
| node_24:<br>feature_name=cg00631702                   | feature_id[943].value <=<br>threshold=0.37470583617687225  |
| node_25:<br>feature_name=cg07912144                   | feature_id[3075].value ><br>threshold=0.5578519105911255   |
| node_29:<br>feature_name=cg24407065                   | feature_id[388].value <=<br>threshold=0.5364363789558411   |
| node_30:<br>feature_name=cg03300805                   | feature_id[1780].value <=<br>threshold=0.03215229045599699 |
| Class: embryonal rhabdomyosarcoma (RMS (EMB))         |                                                            |
|                                                       |                                                            |
| Rules_174                                             | passed counts:1                                            |
| node_0:<br>feature_name=cg11915444                    | feature_id[4116].value ><br>threshold=0.3402601182460785   |
| node_10:<br>feature_name=cg12109728                   | feature_id[4182].value ><br>threshold=0.7068270146846771   |
| node_20:<br>feature_name=cg10844382                   | feature_id[3856].value ><br>threshold=0.5988894104957581   |
| node_24:<br>feature_name=cg00631702                   | feature_id[943].value <=<br>threshold=0.37470583617687225  |
| node_25:<br>feature_name=cg07912144                   | feature_id[3075].value <=<br>threshold=0.5578519105911255  |
| node_26:<br>feature_name=cg07478111                   | feature_id[2959].value <=<br>threshold=0.7341253161430359  |
| Class: mesenchymal chondrosarcoma (CSA (MES))         |                                                            |
|                                                       |                                                            |
| Rules_175                                             | passed counts:1                                            |
| node_0:<br>feature_name=cg11915444                    | feature_id[4116].value ><br>threshold=0.3402601182460785   |
| node_10:<br>feature_name=cg12109728                   | feature_id[4182].value ><br>threshold=0.7068270146846771   |
| node_20:<br>feature_name=cg10844382                   | feature_id[3856].value <=<br>threshold=0.5988894104957581  |

|                                               |                                                           |
|-----------------------------------------------|-----------------------------------------------------------|
| node_21:<br>feature_name=cg02563156           | feature_id[1540].value <=<br>threshold=0.6083262264728546 |
| Class: sarcoma (SARC)                         |                                                           |
|                                               |                                                           |
| Rules_176                                     | passed counts:1                                           |
| node_0:<br>feature_name=cg11915444            | feature_id[4116].value ><br>threshold=0.3402601182460785  |
| node_10:<br>feature_name=cg12109728           | feature_id[4182].value <=<br>threshold=0.7068270146846771 |
| node_11:<br>feature_name=cg23902076           | feature_id[7131].value ><br>threshold=0.8691235482692719  |
| node_13:<br>feature_name=cg20099458           | feature_id[6250].value <=<br>threshold=0.7871655821800232 |
| node_14:<br>feature_name=cg03333116           | feature_id[1790].value ><br>threshold=0.8223622441291809  |
| node_16:<br>feature_name=cg15127656           | feature_id[5038].value ><br>threshold=0.9118743538856506  |
| Class: embryonal rhabdomyosarcoma (RMS (EMB)) |                                                           |
|                                               |                                                           |
| Rules_177                                     | passed counts:1                                           |
| node_0:<br>feature_name=cg11915444            | feature_id[4116].value ><br>threshold=0.3402601182460785  |
| node_10:<br>feature_name=cg12109728           | feature_id[4182].value <=<br>threshold=0.7068270146846771 |
| node_11:<br>feature_name=cg23902076           | feature_id[7131].value ><br>threshold=0.8691235482692719  |
| node_13:<br>feature_name=cg20099458           | feature_id[6250].value <=<br>threshold=0.7871655821800232 |
| node_14:<br>feature_name=cg03333116           | feature_id[1790].value ><br>threshold=0.8223622441291809  |
| node_16:<br>feature_name=cg15127656           | feature_id[5038].value <=<br>threshold=0.9118743538856506 |
| Class: angiosarcoma (AS)                      |                                                           |
|                                               |                                                           |
| Rules_178                                     | passed counts:1                                           |
| node_0:<br>feature_name=cg11915444            | feature_id[4116].value ><br>threshold=0.3402601182460785  |
| node_10:<br>feature_name=cg12109728           | feature_id[4182].value <=<br>threshold=0.7068270146846771 |
| node_11:<br>feature_name=cg23902076           | feature_id[7131].value ><br>threshold=0.8691235482692719  |
| node_13:<br>feature_name=cg20099458           | feature_id[6250].value <=<br>threshold=0.7871655821800232 |



|                                               |                                                           |
|-----------------------------------------------|-----------------------------------------------------------|
| node_14:<br>feature_name=cg03333116           | feature_id[1790].value <=<br>threshold=0.8223622441291809 |
| Class: gastrointestinal stromal tumour (GIST) |                                                           |
|                                               |                                                           |
| Rules_179                                     | passed counts:1                                           |
| node_0:<br>feature_name=cg11915444            | feature_id[4116].value <=<br>threshold=0.3402601182460785 |
| node_1:<br>feature_name=cg00982952            | feature_id[1071].value ><br>threshold=0.7386334538459778  |
| node_3:<br>feature_name=cg22315164            | feature_id[6749].value ><br>threshold=0.35902709513902664 |
| node_5:<br>feature_name=cg09180239            | feature_id[3404].value ><br>threshold=0.5538817346096039  |
| node_7:<br>feature_name=cg00366037            | feature_id[856].value ><br>threshold=0.8601809740066528   |
| Class: chordoma (CHORD)                       |                                                           |
|                                               |                                                           |
| Rules_180                                     | passed counts:1                                           |
| node_0:<br>feature_name=cg11915444            | feature_id[4116].value <=<br>threshold=0.3402601182460785 |
| node_1:<br>feature_name=cg00982952            | feature_id[1071].value ><br>threshold=0.7386334538459778  |
| node_3:<br>feature_name=cg22315164            | feature_id[6749].value ><br>threshold=0.35902709513902664 |
| node_5:<br>feature_name=cg09180239            | feature_id[3404].value ><br>threshold=0.5538817346096039  |
| node_7:<br>feature_name=cg00366037            | feature_id[856].value <=<br>threshold=0.8601809740066528  |
| Class: infantile fibrosarcoma (IFS)           |                                                           |
|                                               |                                                           |
| Rules_181                                     | passed counts:1                                           |
| node_0:<br>feature_name=cg11915444            | feature_id[4116].value <=<br>threshold=0.3402601182460785 |
| node_1:<br>feature_name=cg00982952            | feature_id[1071].value ><br>threshold=0.7386334538459778  |
| node_3:<br>feature_name=cg22315164            | feature_id[6749].value ><br>threshold=0.35902709513902664 |
| node_5:<br>feature_name=cg09180239            | feature_id[3404].value <=<br>threshold=0.5538817346096039 |
| Class: angiosarcoma (AS)                      |                                                           |

(2) Rules on the LightGBM feature list

|         |                  |
|---------|------------------|
| Rules_0 | passed counts:72 |
|---------|------------------|

|                                                       |                                                           |
|-------------------------------------------------------|-----------------------------------------------------------|
| node_0: feature_name=cg11915444                       | feature_id[1171].value <=<br>threshold=0.3402601182460785 |
| node_1: feature_name=cg00204976                       | feature_id[3433].value <=<br>threshold=0.7535275816917419 |
| Class: Ewing sarcoma (EWING)                          |                                                           |
| Rules_1                                               | passed counts:70                                          |
| node_0: feature_name=cg11915444                       | feature_id[1171].value ><br>threshold=0.3402601182460785  |
| node_10: feature_name=cg12109728                      | feature_id[2810].value ><br>threshold=0.7068270146846771  |
| node_20: feature_name=cg16412000                      | feature_id[789].value ><br>threshold=0.6741803884506226   |
| node_24: feature_name=cg17115147                      | feature_id[1434].value ><br>threshold=0.2961975038051605  |
| node_368: feature_name=cg27543578                     | feature_id[878].value <=<br>threshold=0.8884280920028687  |
| node_369: feature_name=cg00133595                     | feature_id[2504].value <=<br>threshold=0.6530520617961884 |
| Class: high-grade conventional osteosarcoma (OS (HG)) |                                                           |
| Rules_2                                               | passed counts:67                                          |
| node_0: feature_name=cg11915444                       | feature_id[1171].value ><br>threshold=0.3402601182460785  |
| node_10: feature_name=cg12109728                      | feature_id[2810].value <=<br>threshold=0.7068270146846771 |
| node_11: feature_name=cg23902076                      | feature_id[1902].value <=<br>threshold=0.8691235482692719 |
| Class: chordoma (CHORD)                               |                                                           |
| Rules_3                                               | passed counts:63                                          |
| node_0: feature_name=cg11915444                       | feature_id[1171].value ><br>threshold=0.3402601182460785  |
| node_10: feature_name=cg12109728                      | feature_id[2810].value ><br>threshold=0.7068270146846771  |
| node_20: feature_name=cg16412000                      | feature_id[789].value ><br>threshold=0.6741803884506226   |
| node_24: feature_name=cg17115147                      | feature_id[1434].value <=<br>threshold=0.2961975038051605 |
| node_25: feature_name=cg24474622                      | feature_id[2737].value ><br>threshold=0.7211934924125671  |

|                                              |                                                           |
|----------------------------------------------|-----------------------------------------------------------|
| node_29: feature_name=cg10472711             | feature_id[612].value ><br>threshold=0.45985929667949677  |
| node_37: feature_name=cg01937669             | feature_id[188].value <=<br>threshold=0.4809463769197464  |
| node_38: feature_name=cg02157052             | feature_id[451].value ><br>threshold=0.2869153320789337   |
| node_344: feature_name=cg21189849            | feature_id[189].value <=<br>threshold=0.7746135592460632  |
| node_345: feature_name=cg00680875            | feature_id[833].value ><br>threshold=0.352913498878479    |
| Class: chondrosarcoma (CSA)                  |                                                           |
|                                              |                                                           |
| Rules_4                                      | passed counts:62                                          |
| node_0: feature_name=cg11915444              | feature_id[1171].value ><br>threshold=0.3402601182460785  |
| node_10: feature_name=cg12109728             | feature_id[2810].value ><br>threshold=0.7068270146846771  |
| node_20: feature_name=cg16412000             | feature_id[789].value <=<br>threshold=0.6741803884506226  |
| node_21: feature_name=cg08571020             | feature_id[921].value <=<br>threshold=0.7741039395332336  |
| Class: alveolar rhabdomyosarcoma (RMS (ALV)) |                                                           |
|                                              |                                                           |
| Rules_5                                      | passed counts:54                                          |
| node_0: feature_name=cg11915444              | feature_id[1171].value ><br>threshold=0.3402601182460785  |
| node_10: feature_name=cg12109728             | feature_id[2810].value ><br>threshold=0.7068270146846771  |
| node_20: feature_name=cg16412000             | feature_id[789].value ><br>threshold=0.6741803884506226   |
| node_24: feature_name=cg17115147             | feature_id[1434].value <=<br>threshold=0.2961975038051605 |
| node_25: feature_name=cg24474622             | feature_id[2737].value <=<br>threshold=0.7211934924125671 |
| node_26: feature_name=cg09828346             | feature_id[2249].value <=<br>threshold=0.73759526014328   |
| Class: synovial sarcoma (SYSA)               |                                                           |
|                                              |                                                           |
| Rules_6                                      | passed counts:49                                          |
| node_0: feature_name=cg11915444              | feature_id[1171].value ><br>threshold=0.3402601182460785  |

|                                               |                                                           |
|-----------------------------------------------|-----------------------------------------------------------|
| node_10: feature_name=cg12109728              | feature_id[2810].value ><br>threshold=0.7068270146846771  |
| node_20: feature_name=cg16412000              | feature_id[789].value ><br>threshold=0.6741803884506226   |
| node_24: feature_name=cg17115147              | feature_id[1434].value <=<br>threshold=0.2961975038051605 |
| node_25: feature_name=cg24474622              | feature_id[2737].value ><br>threshold=0.7211934924125671  |
| node_29: feature_name=cg10472711              | feature_id[612].value <=<br>threshold=0.45985929667949677 |
| node_30: feature_name=cg06132803              | feature_id[3655].value ><br>threshold=0.420499712228775   |
| Class: gastrointestinal stromal tumour (GIST) |                                                           |
|                                               |                                                           |
| Rules_7                                       | passed counts:48                                          |
| node_0: feature_name=cg11915444               | feature_id[1171].value ><br>threshold=0.3402601182460785  |
| node_10: feature_name=cg12109728              | feature_id[2810].value ><br>threshold=0.7068270146846771  |
| node_20: feature_name=cg16412000              | feature_id[789].value ><br>threshold=0.6741803884506226   |
| node_24: feature_name=cg17115147              | feature_id[1434].value <=<br>threshold=0.2961975038051605 |
| node_25: feature_name=cg24474622              | feature_id[2737].value ><br>threshold=0.7211934924125671  |
| node_29: feature_name=cg10472711              | feature_id[612].value ><br>threshold=0.45985929667949677  |
| node_37: feature_name=cg01937669              | feature_id[188].value ><br>threshold=0.4809463769197464   |
| node_363: feature_name=cg14588828             | feature_id[2222].value ><br>threshold=0.9071650803089142  |
| Class: leiomyosarcoma (LMS)                   |                                                           |
|                                               |                                                           |
| Rules_8                                       | passed counts:42                                          |
| node_0: feature_name=cg11915444               | feature_id[1171].value ><br>threshold=0.3402601182460785  |
| node_10: feature_name=cg12109728              | feature_id[2810].value ><br>threshold=0.7068270146846771  |
| node_20: feature_name=cg16412000              | feature_id[789].value ><br>threshold=0.6741803884506226   |
| node_24: feature_name=cg17115147              | feature_id[1434].value <=<br>threshold=0.2961975038051605 |

|                                                     |                                                           |
|-----------------------------------------------------|-----------------------------------------------------------|
| node_25: feature_name=cg24474622                    | feature_id[2737].value ><br>threshold=0.7211934924125671  |
| node_29: feature_name=cg10472711                    | feature_id[612].value ><br>threshold=0.45985929667949677  |
| node_37: feature_name=cg01937669                    | feature_id[188].value <=<br>threshold=0.4809463769197464  |
| node_38: feature_name=cg02157052                    | feature_id[451].value <=<br>threshold=0.2869153320789337  |
| node_39: feature_name=cg18751958                    | feature_id[1427].value <=<br>threshold=0.4813787043094635 |
| Class: desmoplastic small round cell tumour (DSRCT) |                                                           |
|                                                     |                                                           |
| Rules_9                                             | passed counts:40                                          |
| node_0: feature_name=cg11915444                     | feature_id[1171].value ><br>threshold=0.3402601182460785  |
| node_10: feature_name=cg12109728                    | feature_id[2810].value ><br>threshold=0.7068270146846771  |
| node_20: feature_name=cg16412000                    | feature_id[789].value ><br>threshold=0.6741803884506226   |
| node_24: feature_name=cg17115147                    | feature_id[1434].value <=<br>threshold=0.2961975038051605 |
| node_25: feature_name=cg24474622                    | feature_id[2737].value ><br>threshold=0.7211934924125671  |
| node_29: feature_name=cg10472711                    | feature_id[612].value ><br>threshold=0.45985929667949677  |
| node_37: feature_name=cg01937669                    | feature_id[188].value <=<br>threshold=0.4809463769197464  |
| node_38: feature_name=cg02157052                    | feature_id[451].value <=<br>threshold=0.2869153320789337  |
| node_39: feature_name=cg18751958                    | feature_id[1427].value ><br>threshold=0.4813787043094635  |
| node_41: feature_name=cg22512847                    | feature_id[1152].value ><br>threshold=0.5129324495792389  |
| node_43: feature_name=cg23345038                    | feature_id[1147].value ><br>threshold=0.6318148374557495  |
| node_45: feature_name=cg17439009                    | feature_id[1815].value ><br>threshold=0.48514117300510406 |
| node_337: feature_name=cg14005246                   | feature_id[69].value ><br>threshold=0.4851873368024826    |
| Class: embryonal rhabdomyosarcoma (RMS (EMB))       |                                                           |
|                                                     |                                                           |

|                                  |                                                            |
|----------------------------------|------------------------------------------------------------|
| Rules_10                         | passed counts:40                                           |
| node_0: feature_name=cg11915444  | feature_id[1171].value ><br>threshold=0.3402601182460785   |
| node_10: feature_name=cg12109728 | feature_id[2810].value ><br>threshold=0.7068270146846771   |
| node_20: feature_name=cg16412000 | feature_id[789].value ><br>threshold=0.6741803884506226    |
| node_24: feature_name=cg17115147 | feature_id[1434].value <=<br>threshold=0.2961975038051605  |
| node_25: feature_name=cg24474622 | feature_id[2737].value ><br>threshold=0.7211934924125671   |
| node_29: feature_name=cg10472711 | feature_id[612].value ><br>threshold=0.45985929667949677   |
| node_37: feature_name=cg01937669 | feature_id[188].value <=<br>threshold=0.4809463769197464   |
| node_38: feature_name=cg02157052 | feature_id[451].value <=<br>threshold=0.2869153320789337   |
| node_39: feature_name=cg18751958 | feature_id[1427].value ><br>threshold=0.4813787043094635   |
| node_41: feature_name=cg22512847 | feature_id[1152].value ><br>threshold=0.5129324495792389   |
| node_43: feature_name=cg23345038 | feature_id[1147].value ><br>threshold=0.6318148374557495   |
| node_45: feature_name=cg17439009 | feature_id[1815].value <=<br>threshold=0.48514117300510406 |
| node_46: feature_name=cg17537493 | feature_id[2772].value <=<br>threshold=0.5825372636318207  |
| node_47: feature_name=cg16572224 | feature_id[2780].value ><br>threshold=0.6722612977027893   |
| Class: angiosarcoma (AS)         |                                                            |
| Rules_11                         | passed counts:38                                           |
| node_0: feature_name=cg11915444  | feature_id[1171].value ><br>threshold=0.3402601182460785   |
| node_10: feature_name=cg12109728 | feature_id[2810].value ><br>threshold=0.7068270146846771   |
| node_20: feature_name=cg16412000 | feature_id[789].value ><br>threshold=0.6741803884506226    |
| node_24: feature_name=cg17115147 | feature_id[1434].value <=<br>threshold=0.2961975038051605  |
| node_25: feature_name=cg24474622 | feature_id[2737].value ><br>threshold=0.7211934924125671   |

|                                               |                                                           |
|-----------------------------------------------|-----------------------------------------------------------|
| node_29: feature_name=cg10472711              | feature_id[612].value ><br>threshold=0.45985929667949677  |
| node_37: feature_name=cg01937669              | feature_id[188].value <=<br>threshold=0.4809463769197464  |
| node_38: feature_name=cg02157052              | feature_id[451].value <=<br>threshold=0.2869153320789337  |
| node_39: feature_name=cg18751958              | feature_id[1427].value ><br>threshold=0.4813787043094635  |
| node_41: feature_name=cg22512847              | feature_id[1152].value ><br>threshold=0.5129324495792389  |
| node_43: feature_name=cg23345038              | feature_id[1147].value <=<br>threshold=0.6318148374557495 |
| Class: myxoid liposarcoma (MLS)               |                                                           |
|                                               |                                                           |
| Rules_12                                      | passed counts:38                                          |
| node_0: feature_name=cg11915444               | feature_id[1171].value ><br>threshold=0.3402601182460785  |
| node_10: feature_name=cg12109728              | feature_id[2810].value ><br>threshold=0.7068270146846771  |
| node_20: feature_name=cg16412000              | feature_id[789].value ><br>threshold=0.6741803884506226   |
| node_24: feature_name=cg17115147              | feature_id[1434].value <=<br>threshold=0.2961975038051605 |
| node_25: feature_name=cg24474622              | feature_id[2737].value ><br>threshold=0.7211934924125671  |
| node_29: feature_name=cg10472711              | feature_id[612].value ><br>threshold=0.45985929667949677  |
| node_37: feature_name=cg01937669              | feature_id[188].value <=<br>threshold=0.4809463769197464  |
| node_38: feature_name=cg02157052              | feature_id[451].value <=<br>threshold=0.2869153320789337  |
| node_39: feature_name=cg18751958              | feature_id[1427].value ><br>threshold=0.4813787043094635  |
| node_41: feature_name=cg22512847              | feature_id[1152].value <=<br>threshold=0.5129324495792389 |
| Class: dermatofibrosarcoma protuberans (DFSP) |                                                           |
|                                               |                                                           |
| Rules_13                                      | passed counts:35                                          |
| node_0: feature_name=cg11915444               | feature_id[1171].value ><br>threshold=0.3402601182460785  |
| node_10: feature_name=cg12109728              | feature_id[2810].value ><br>threshold=0.7068270146846771  |

|                                   |                                                            |
|-----------------------------------|------------------------------------------------------------|
| node_20: feature_name=cg16412000  | feature_id[789].value ><br>threshold=0.6741803884506226    |
| node_24: feature_name=cg17115147  | feature_id[1434].value <=<br>threshold=0.2961975038051605  |
| node_25: feature_name=cg24474622  | feature_id[2737].value ><br>threshold=0.7211934924125671   |
| node_29: feature_name=cg10472711  | feature_id[612].value ><br>threshold=0.45985929667949677   |
| node_37: feature_name=cg01937669  | feature_id[188].value <=<br>threshold=0.4809463769197464   |
| node_38: feature_name=cg02157052  | feature_id[451].value <=<br>threshold=0.2869153320789337   |
| node_39: feature_name=cg18751958  | feature_id[1427].value ><br>threshold=0.4813787043094635   |
| node_41: feature_name=cg22512847  | feature_id[1152].value ><br>threshold=0.5129324495792389   |
| node_43: feature_name=cg23345038  | feature_id[1147].value ><br>threshold=0.6318148374557495   |
| node_45: feature_name=cg17439009  | feature_id[1815].value <=<br>threshold=0.48514117300510406 |
| node_46: feature_name=cg17537493  | feature_id[2772].value ><br>threshold=0.5825372636318207   |
| node_52: feature_name=cg01683570  | feature_id[110].value ><br>threshold=0.6040188074111938    |
| node_54: feature_name=cg15720017  | feature_id[168].value ><br>threshold=0.7067741453647614    |
| node_60: feature_name=cg23690444  | feature_id[120].value <=<br>threshold=0.16037724912166595  |
| node_61: feature_name=cg00567872  | feature_id[236].value ><br>threshold=0.7005765736103058    |
| node_85: feature_name=cg01014262  | feature_id[764].value <=<br>threshold=0.5737917125225067   |
| node_86: feature_name=cg22946562  | feature_id[1148].value <=<br>threshold=0.6328203976154327  |
| node_87: feature_name=cg18120975  | feature_id[2767].value ><br>threshold=0.7081544995307922   |
| node_91: feature_name=cg17171539  | feature_id[25].value <=<br>threshold=0.501024603843689     |
| node_92: feature_name=cg00007036  | feature_id[1586].value ><br>threshold=0.943472146987915    |
| node_104: feature_name=cg14156441 | feature_id[3273].value <=<br>threshold=0.24960360676050186 |
| node_105: feature_name=cg10885338 | feature_id[3603].value <=<br>threshold=0.7335180938243866  |



|                                         |                                                            |
|-----------------------------------------|------------------------------------------------------------|
| Class: undifferentiated sarcoma (USARC) |                                                            |
|                                         |                                                            |
| Rules_14                                | passed counts:30                                           |
| node_0: feature_name=cg11915444         | feature_id[1171].value ><br>threshold=0.3402601182460785   |
| node_10: feature_name=cg12109728        | feature_id[2810].value ><br>threshold=0.7068270146846771   |
| node_20: feature_name=cg16412000        | feature_id[789].value ><br>threshold=0.6741803884506226    |
| node_24: feature_name=cg17115147        | feature_id[1434].value <=<br>threshold=0.2961975038051605  |
| node_25: feature_name=cg24474622        | feature_id[2737].value ><br>threshold=0.7211934924125671   |
| node_29: feature_name=cg10472711        | feature_id[612].value ><br>threshold=0.45985929667949677   |
| node_37: feature_name=cg01937669        | feature_id[188].value <=<br>threshold=0.4809463769197464   |
| node_38: feature_name=cg02157052        | feature_id[451].value <=<br>threshold=0.2869153320789337   |
| node_39: feature_name=cg18751958        | feature_id[1427].value ><br>threshold=0.4813787043094635   |
| node_41: feature_name=cg22512847        | feature_id[1152].value ><br>threshold=0.5129324495792389   |
| node_43: feature_name=cg23345038        | feature_id[1147].value ><br>threshold=0.6318148374557495   |
| node_45: feature_name=cg17439009        | feature_id[1815].value <=<br>threshold=0.48514117300510406 |
| node_46: feature_name=cg17537493        | feature_id[2772].value ><br>threshold=0.5825372636318207   |
| node_52: feature_name=cg01683570        | feature_id[110].value <=<br>threshold=0.6040188074111938   |
| Class: schwannoma (SWN)                 |                                                            |
|                                         |                                                            |
| Rules_15                                | passed counts:29                                           |
| node_0: feature_name=cg11915444         | feature_id[1171].value ><br>threshold=0.3402601182460785   |
| node_10: feature_name=cg12109728        | feature_id[2810].value ><br>threshold=0.7068270146846771   |
| node_20: feature_name=cg16412000        | feature_id[789].value ><br>threshold=0.6741803884506226    |
| node_24: feature_name=cg17115147        | feature_id[1434].value <=<br>threshold=0.2961975038051605  |

|                                                         |                                                            |
|---------------------------------------------------------|------------------------------------------------------------|
| node_25: feature_name=cg24474622                        | feature_id[2737].value ><br>threshold=0.7211934924125671   |
| node_29: feature_name=cg10472711                        | feature_id[612].value ><br>threshold=0.45985929667949677   |
| node_37: feature_name=cg01937669                        | feature_id[188].value <=<br>threshold=0.4809463769197464   |
| node_38: feature_name=cg02157052                        | feature_id[451].value <=<br>threshold=0.2869153320789337   |
| node_39: feature_name=cg18751958                        | feature_id[1427].value ><br>threshold=0.4813787043094635   |
| node_41: feature_name=cg22512847                        | feature_id[1152].value ><br>threshold=0.5129324495792389   |
| node_43: feature_name=cg23345038                        | feature_id[1147].value ><br>threshold=0.6318148374557495   |
| node_45: feature_name=cg17439009                        | feature_id[1815].value <=<br>threshold=0.48514117300510406 |
| node_46: feature_name=cg17537493                        | feature_id[2772].value ><br>threshold=0.5825372636318207   |
| node_52: feature_name=cg01683570                        | feature_id[110].value ><br>threshold=0.6040188074111938    |
| node_54: feature_name=cg15720017                        | feature_id[168].value ><br>threshold=0.7067741453647614    |
| node_60: feature_name=cg23690444                        | feature_id[120].value <=<br>threshold=0.16037724912166595  |
| node_61: feature_name=cg00567872                        | feature_id[236].value ><br>threshold=0.7005765736103058    |
| node_85: feature_name=cg01014262                        | feature_id[764].value <=<br>threshold=0.5737917125225067   |
| node_86: feature_name=cg22946562                        | feature_id[1148].value ><br>threshold=0.6328203976154327   |
| node_134: feature_name=cg14514032                       | feature_id[202].value ><br>threshold=0.4389604330062866    |
| node_312: feature_name=cg21670987                       | feature_id[1509].value ><br>threshold=0.32477423548698425  |
| node_324: feature_name=cg10520924                       | feature_id[1943].value <=<br>threshold=0.8430010974407196  |
| Class: malignant peripheral nerve sheath tumour (MPNST) |                                                            |
|                                                         |                                                            |
| Rules_16                                                | passed counts:27                                           |
| node_0: feature_name=cg11915444                         | feature_id[1171].value ><br>threshold=0.3402601182460785   |

|                                          |                                                            |
|------------------------------------------|------------------------------------------------------------|
| node_10: feature_name=cg12109728         | feature_id[2810].value ><br>threshold=0.7068270146846771   |
| node_20: feature_name=cg16412000         | feature_id[789].value ><br>threshold=0.6741803884506226    |
| node_24: feature_name=cg17115147         | feature_id[1434].value <=<br>threshold=0.2961975038051605  |
| node_25: feature_name=cg24474622         | feature_id[2737].value ><br>threshold=0.7211934924125671   |
| node_29: feature_name=cg10472711         | feature_id[612].value ><br>threshold=0.45985929667949677   |
| node_37: feature_name=cg01937669         | feature_id[188].value <=<br>threshold=0.4809463769197464   |
| node_38: feature_name=cg02157052         | feature_id[451].value <=<br>threshold=0.2869153320789337   |
| node_39: feature_name=cg18751958         | feature_id[1427].value ><br>threshold=0.4813787043094635   |
| node_41: feature_name=cg22512847         | feature_id[1152].value ><br>threshold=0.5129324495792389   |
| node_43: feature_name=cg23345038         | feature_id[1147].value ><br>threshold=0.6318148374557495   |
| node_45: feature_name=cg17439009         | feature_id[1815].value <=<br>threshold=0.48514117300510406 |
| node_46: feature_name=cg17537493         | feature_id[2772].value ><br>threshold=0.5825372636318207   |
| node_52: feature_name=cg01683570         | feature_id[110].value ><br>threshold=0.6040188074111938    |
| node_54: feature_name=cg15720017         | feature_id[168].value ><br>threshold=0.7067741453647614    |
| node_60: feature_name=cg23690444         | feature_id[120].value <=<br>threshold=0.16037724912166595  |
| node_61: feature_name=cg00567872         | feature_id[236].value <=<br>threshold=0.7005765736103058   |
| node_62: feature_name=cg09293488         | feature_id[2629].value <=<br>threshold=0.839823454618454   |
| node_63: feature_name=cg19201770         | feature_id[2194].value ><br>threshold=0.5603366196155548   |
| Class: alveolar soft part sarcoma (ASPS) |                                                            |
|                                          |                                                            |
| Rules_17                                 | passed counts:27                                           |
| node_0: feature_name=cg11915444          | feature_id[1171].value ><br>threshold=0.3402601182460785   |
| node_10: feature_name=cg12109728         | feature_id[2810].value ><br>threshold=0.7068270146846771   |

|                                      |                                                            |
|--------------------------------------|------------------------------------------------------------|
| node_20: feature_name=cg16412000     | feature_id[789].value ><br>threshold=0.6741803884506226    |
| node_24: feature_name=cg17115147     | feature_id[1434].value <=<br>threshold=0.2961975038051605  |
| node_25: feature_name=cg24474622     | feature_id[2737].value ><br>threshold=0.7211934924125671   |
| node_29: feature_name=cg10472711     | feature_id[612].value ><br>threshold=0.45985929667949677   |
| node_37: feature_name=cg01937669     | feature_id[188].value <=<br>threshold=0.4809463769197464   |
| node_38: feature_name=cg02157052     | feature_id[451].value <=<br>threshold=0.2869153320789337   |
| node_39: feature_name=cg18751958     | feature_id[1427].value ><br>threshold=0.4813787043094635   |
| node_41: feature_name=cg22512847     | feature_id[1152].value ><br>threshold=0.5129324495792389   |
| node_43: feature_name=cg23345038     | feature_id[1147].value ><br>threshold=0.6318148374557495   |
| node_45: feature_name=cg17439009     | feature_id[1815].value <=<br>threshold=0.48514117300510406 |
| node_46: feature_name=cg17537493     | feature_id[2772].value ><br>threshold=0.5825372636318207   |
| node_52: feature_name=cg01683570     | feature_id[110].value ><br>threshold=0.6040188074111938    |
| node_54: feature_name=cg15720017     | feature_id[168].value <=<br>threshold=0.7067741453647614   |
| node_55: feature_name=cg17216243     | feature_id[1006].value ><br>threshold=0.48612095415592194  |
| Class: solitary fibrous tumour (SFT) |                                                            |
|                                      |                                                            |
| Rules_18                             | passed counts:25                                           |
| node_0: feature_name=cg11915444      | feature_id[1171].value ><br>threshold=0.3402601182460785   |
| node_10: feature_name=cg12109728     | feature_id[2810].value ><br>threshold=0.7068270146846771   |
| node_20: feature_name=cg16412000     | feature_id[789].value ><br>threshold=0.6741803884506226    |
| node_24: feature_name=cg17115147     | feature_id[1434].value <=<br>threshold=0.2961975038051605  |
| node_25: feature_name=cg24474622     | feature_id[2737].value ><br>threshold=0.7211934924125671   |
| node_29: feature_name=cg10472711     | feature_id[612].value ><br>threshold=0.45985929667949677   |

|                                  |                                                            |
|----------------------------------|------------------------------------------------------------|
| node_37: feature_name=cg01937669 | feature_id[188].value <=<br>threshold=0.4809463769197464   |
| node_38: feature_name=cg02157052 | feature_id[451].value <=<br>threshold=0.2869153320789337   |
| node_39: feature_name=cg18751958 | feature_id[1427].value ><br>threshold=0.4813787043094635   |
| node_41: feature_name=cg22512847 | feature_id[1152].value ><br>threshold=0.5129324495792389   |
| node_43: feature_name=cg23345038 | feature_id[1147].value ><br>threshold=0.6318148374557495   |
| node_45: feature_name=cg17439009 | feature_id[1815].value <=<br>threshold=0.48514117300510406 |
| node_46: feature_name=cg17537493 | feature_id[2772].value ><br>threshold=0.5825372636318207   |
| node_52: feature_name=cg01683570 | feature_id[110].value ><br>threshold=0.6040188074111938    |
| node_54: feature_name=cg15720017 | feature_id[168].value ><br>threshold=0.7067741453647614    |
| node_60: feature_name=cg23690444 | feature_id[120].value ><br>threshold=0.16037724912166595   |
| Class: epithelioid sarcoma (ES)  |                                                            |
|                                  |                                                            |
| Rules_19                         | passed counts:21                                           |
| node_0: feature_name=cg11915444  | feature_id[1171].value ><br>threshold=0.3402601182460785   |
| node_10: feature_name=cg12109728 | feature_id[2810].value ><br>threshold=0.7068270146846771   |
| node_20: feature_name=cg16412000 | feature_id[789].value ><br>threshold=0.6741803884506226    |
| node_24: feature_name=cg17115147 | feature_id[1434].value <=<br>threshold=0.2961975038051605  |
| node_25: feature_name=cg24474622 | feature_id[2737].value ><br>threshold=0.7211934924125671   |
| node_29: feature_name=cg10472711 | feature_id[612].value ><br>threshold=0.45985929667949677   |
| node_37: feature_name=cg01937669 | feature_id[188].value <=<br>threshold=0.4809463769197464   |
| node_38: feature_name=cg02157052 | feature_id[451].value <=<br>threshold=0.2869153320789337   |
| node_39: feature_name=cg18751958 | feature_id[1427].value ><br>threshold=0.4813787043094635   |
| node_41: feature_name=cg22512847 | feature_id[1152].value ><br>threshold=0.5129324495792389   |

|                                                                                   |                                                            |
|-----------------------------------------------------------------------------------|------------------------------------------------------------|
| node_43: feature_name=cg23345038                                                  | feature_id[1147].value ><br>threshold=0.6318148374557495   |
| node_45: feature_name=cg17439009                                                  | feature_id[1815].value <=<br>threshold=0.48514117300510406 |
| node_46: feature_name=cg17537493                                                  | feature_id[2772].value ><br>threshold=0.5825372636318207   |
| node_52: feature_name=cg01683570                                                  | feature_id[110].value ><br>threshold=0.6040188074111938    |
| node_54: feature_name=cg15720017                                                  | feature_id[168].value ><br>threshold=0.7067741453647614    |
| node_60: feature_name=cg23690444                                                  | feature_id[120].value <=<br>threshold=0.16037724912166595  |
| node_61: feature_name=cg00567872                                                  | feature_id[236].value ><br>threshold=0.7005765736103058    |
| node_85: feature_name=cg01014262                                                  | feature_id[764].value <=<br>threshold=0.5737917125225067   |
| node_86: feature_name=cg22946562                                                  | feature_id[1148].value ><br>threshold=0.6328203976154327   |
| node_134: feature_name=cg14514032                                                 | feature_id[202].value <=<br>threshold=0.4389604330062866   |
| node_135: feature_name=cg13488220                                                 | feature_id[241].value ><br>threshold=0.7352153658866882    |
| node_143: feature_name=cg03840920                                                 | feature_id[256].value ><br>threshold=0.502630889415741     |
| node_147: feature_name=cg13634090                                                 | feature_id[822].value ><br>threshold=0.7207068204879761    |
| node_151: feature_name=cg19584674                                                 | feature_id[2364].value <=<br>threshold=0.41758519411087036 |
| node_152: feature_name=cg07344990                                                 | feature_id[411].value ><br>threshold=0.5484964847564697    |
| node_158: feature_name=cg10298992                                                 | feature_id[3066].value <=<br>threshold=0.5707973837852478  |
| node_159: feature_name=cg24852135                                                 | feature_id[47].value ><br>threshold=0.8445721566677094     |
| node_171: feature_name=cg06474428                                                 | feature_id[3652].value <=<br>threshold=0.9347167015075684  |
| Class: well differentiated liposarcoma (WDLS)/dedifferentiated liposarcoma (DDLs) |                                                            |
|                                                                                   |                                                            |
| Rules_20                                                                          | passed counts:18                                           |
| node_0: feature_name=cg11915444                                                   | feature_id[1171].value ><br>threshold=0.3402601182460785   |

|                                        |                                                            |
|----------------------------------------|------------------------------------------------------------|
| node_10: feature_name=cg12109728       | feature_id[2810].value ><br>threshold=0.7068270146846771   |
| node_20: feature_name=cg16412000       | feature_id[789].value ><br>threshold=0.6741803884506226    |
| node_24: feature_name=cg17115147       | feature_id[1434].value <=<br>threshold=0.2961975038051605  |
| node_25: feature_name=cg24474622       | feature_id[2737].value ><br>threshold=0.7211934924125671   |
| node_29: feature_name=cg10472711       | feature_id[612].value ><br>threshold=0.45985929667949677   |
| node_37: feature_name=cg01937669       | feature_id[188].value <=<br>threshold=0.4809463769197464   |
| node_38: feature_name=cg02157052       | feature_id[451].value <=<br>threshold=0.2869153320789337   |
| node_39: feature_name=cg18751958       | feature_id[1427].value ><br>threshold=0.4813787043094635   |
| node_41: feature_name=cg22512847       | feature_id[1152].value ><br>threshold=0.5129324495792389   |
| node_43: feature_name=cg23345038       | feature_id[1147].value ><br>threshold=0.6318148374557495   |
| node_45: feature_name=cg17439009       | feature_id[1815].value <=<br>threshold=0.48514117300510406 |
| node_46: feature_name=cg17537493       | feature_id[2772].value ><br>threshold=0.5825372636318207   |
| node_52: feature_name=cg01683570       | feature_id[110].value ><br>threshold=0.6040188074111938    |
| node_54: feature_name=cg15720017       | feature_id[168].value ><br>threshold=0.7067741453647614    |
| node_60: feature_name=cg23690444       | feature_id[120].value <=<br>threshold=0.16037724912166595  |
| node_61: feature_name=cg00567872       | feature_id[236].value ><br>threshold=0.7005765736103058    |
| node_85: feature_name=cg01014262       | feature_id[764].value ><br>threshold=0.5737917125225067    |
| node_331: feature_name=cg16897462      | feature_id[3257].value ><br>threshold=0.24157879501581192  |
| Class: malignant rhabdoid tumour (MRT) |                                                            |
|                                        |                                                            |
| Rules_21                               | passed counts:16                                           |
| node_0: feature_name=cg11915444        | feature_id[1171].value ><br>threshold=0.3402601182460785   |
| node_10: feature_name=cg12109728       | feature_id[2810].value ><br>threshold=0.7068270146846771   |

|                                                  |                                                            |
|--------------------------------------------------|------------------------------------------------------------|
| node_20: feature_name=cg16412000                 | feature_id[789].value ><br>threshold=0.6741803884506226    |
| node_24: feature_name=cg17115147                 | feature_id[1434].value <=<br>threshold=0.2961975038051605  |
| node_25: feature_name=cg24474622                 | feature_id[2737].value ><br>threshold=0.7211934924125671   |
| node_29: feature_name=cg10472711                 | feature_id[612].value ><br>threshold=0.45985929667949677   |
| node_37: feature_name=cg01937669                 | feature_id[188].value <=<br>threshold=0.4809463769197464   |
| node_38: feature_name=cg02157052                 | feature_id[451].value <=<br>threshold=0.2869153320789337   |
| node_39: feature_name=cg18751958                 | feature_id[1427].value ><br>threshold=0.4813787043094635   |
| node_41: feature_name=cg22512847                 | feature_id[1152].value ><br>threshold=0.5129324495792389   |
| node_43: feature_name=cg23345038                 | feature_id[1147].value ><br>threshold=0.6318148374557495   |
| node_45: feature_name=cg17439009                 | feature_id[1815].value <=<br>threshold=0.48514117300510406 |
| node_46: feature_name=cg17537493                 | feature_id[2772].value ><br>threshold=0.5825372636318207   |
| node_52: feature_name=cg01683570                 | feature_id[110].value ><br>threshold=0.6040188074111938    |
| node_54: feature_name=cg15720017                 | feature_id[168].value ><br>threshold=0.7067741453647614    |
| node_60: feature_name=cg23690444                 | feature_id[120].value <=<br>threshold=0.16037724912166595  |
| node_61: feature_name=cg00567872                 | feature_id[236].value ><br>threshold=0.7005765736103058    |
| node_85: feature_name=cg01014262                 | feature_id[764].value <=<br>threshold=0.5737917125225067   |
| node_86: feature_name=cg22946562                 | feature_id[1148].value ><br>threshold=0.6328203976154327   |
| node_134: feature_name=cg14514032                | feature_id[202].value <=<br>threshold=0.4389604330062866   |
| node_135: feature_name=cg13488220                | feature_id[241].value <=<br>threshold=0.7352153658866882   |
| node_136: feature_name=cg06132803                | feature_id[3655].value ><br>threshold=0.29061736911535263  |
| Class: angioleiomyoma (ALMO)/myopericytoma (MPC) |                                                            |
|                                                  |                                                            |



|                                   |                                                            |
|-----------------------------------|------------------------------------------------------------|
| Rules_22                          | passed counts:13                                           |
| node_0: feature_name=cg11915444   | feature_id[1171].value ><br>threshold=0.3402601182460785   |
| node_10: feature_name=cg12109728  | feature_id[2810].value ><br>threshold=0.7068270146846771   |
| node_20: feature_name=cg16412000  | feature_id[789].value ><br>threshold=0.6741803884506226    |
| node_24: feature_name=cg17115147  | feature_id[1434].value <=<br>threshold=0.2961975038051605  |
| node_25: feature_name=cg24474622  | feature_id[2737].value ><br>threshold=0.7211934924125671   |
| node_29: feature_name=cg10472711  | feature_id[612].value ><br>threshold=0.45985929667949677   |
| node_37: feature_name=cg01937669  | feature_id[188].value <=<br>threshold=0.4809463769197464   |
| node_38: feature_name=cg02157052  | feature_id[451].value <=<br>threshold=0.2869153320789337   |
| node_39: feature_name=cg18751958  | feature_id[1427].value ><br>threshold=0.4813787043094635   |
| node_41: feature_name=cg22512847  | feature_id[1152].value ><br>threshold=0.5129324495792389   |
| node_43: feature_name=cg23345038  | feature_id[1147].value ><br>threshold=0.6318148374557495   |
| node_45: feature_name=cg17439009  | feature_id[1815].value <=<br>threshold=0.48514117300510406 |
| node_46: feature_name=cg17537493  | feature_id[2772].value ><br>threshold=0.5825372636318207   |
| node_52: feature_name=cg01683570  | feature_id[110].value ><br>threshold=0.6040188074111938    |
| node_54: feature_name=cg15720017  | feature_id[168].value ><br>threshold=0.7067741453647614    |
| node_60: feature_name=cg23690444  | feature_id[120].value <=<br>threshold=0.16037724912166595  |
| node_61: feature_name=cg00567872  | feature_id[236].value ><br>threshold=0.7005765736103058    |
| node_85: feature_name=cg01014262  | feature_id[764].value <=<br>threshold=0.5737917125225067   |
| node_86: feature_name=cg22946562  | feature_id[1148].value ><br>threshold=0.6328203976154327   |
| node_134: feature_name=cg14514032 | feature_id[202].value <=<br>threshold=0.4389604330062866   |
| node_135: feature_name=cg13488220 | feature_id[241].value ><br>threshold=0.7352153658866882    |

|                                             |                                                            |
|---------------------------------------------|------------------------------------------------------------|
| node_143: feature_name=cg03840920           | feature_id[256].value ><br>threshold=0.502630889415741     |
| node_147: feature_name=cg13634090           | feature_id[822].value ><br>threshold=0.7207068204879761    |
| node_151: feature_name=cg19584674           | feature_id[2364].value ><br>threshold=0.41758519411087036  |
| node_307: feature_name=cg07795968           | feature_id[2451].value <=<br>threshold=0.7859841883182526  |
| Class: small blue round cell tumour (SBRCT) |                                                            |
|                                             |                                                            |
| Rules_23                                    | passed counts:13                                           |
| node_0: feature_name=cg11915444             | feature_id[1171].value ><br>threshold=0.3402601182460785   |
| node_10: feature_name=cg12109728            | feature_id[2810].value ><br>threshold=0.7068270146846771   |
| node_20: feature_name=cg16412000            | feature_id[789].value ><br>threshold=0.6741803884506226    |
| node_24: feature_name=cg17115147            | feature_id[1434].value <=<br>threshold=0.2961975038051605  |
| node_25: feature_name=cg24474622            | feature_id[2737].value ><br>threshold=0.7211934924125671   |
| node_29: feature_name=cg10472711            | feature_id[612].value ><br>threshold=0.45985929667949677   |
| node_37: feature_name=cg01937669            | feature_id[188].value <=<br>threshold=0.4809463769197464   |
| node_38: feature_name=cg02157052            | feature_id[451].value <=<br>threshold=0.2869153320789337   |
| node_39: feature_name=cg18751958            | feature_id[1427].value ><br>threshold=0.4813787043094635   |
| node_41: feature_name=cg22512847            | feature_id[1152].value ><br>threshold=0.5129324495792389   |
| node_43: feature_name=cg23345038            | feature_id[1147].value ><br>threshold=0.6318148374557495   |
| node_45: feature_name=cg17439009            | feature_id[1815].value <=<br>threshold=0.48514117300510406 |
| node_46: feature_name=cg17537493            | feature_id[2772].value ><br>threshold=0.5825372636318207   |
| node_52: feature_name=cg01683570            | feature_id[110].value ><br>threshold=0.6040188074111938    |
| node_54: feature_name=cg15720017            | feature_id[168].value ><br>threshold=0.7067741453647614    |
| node_60: feature_name=cg23690444            | feature_id[120].value <=<br>threshold=0.16037724912166595  |

|                                                         |                                                            |
|---------------------------------------------------------|------------------------------------------------------------|
| node_61: feature_name=cg00567872                        | feature_id[236].value ><br>threshold=0.7005765736103058    |
| node_85: feature_name=cg01014262                        | feature_id[764].value <=<br>threshold=0.5737917125225067   |
| node_86: feature_name=cg22946562                        | feature_id[1148].value ><br>threshold=0.6328203976154327   |
| node_134: feature_name=cg14514032                       | feature_id[202].value <=<br>threshold=0.4389604330062866   |
| node_135: feature_name=cg13488220                       | feature_id[241].value ><br>threshold=0.7352153658866882    |
| node_143: feature_name=cg03840920                       | feature_id[256].value ><br>threshold=0.502630889415741     |
| node_147: feature_name=cg13634090                       | feature_id[822].value ><br>threshold=0.7207068204879761    |
| node_151: feature_name=cg19584674                       | feature_id[2364].value <=<br>threshold=0.41758519411087036 |
| node_152: feature_name=cg07344990                       | feature_id[411].value <=<br>threshold=0.5484964847564697   |
| node_153: feature_name=cg18369990                       | feature_id[2197].value ><br>threshold=0.621816486120224    |
| Class: low-grade endometrial stromal sarcoma (ESS (LG)) |                                                            |
|                                                         |                                                            |
| Rules_24                                                | passed counts:13                                           |
| node_0: feature_name=cg11915444                         | feature_id[1171].value ><br>threshold=0.3402601182460785   |
| node_10: feature_name=cg12109728                        | feature_id[2810].value ><br>threshold=0.7068270146846771   |
| node_20: feature_name=cg16412000                        | feature_id[789].value ><br>threshold=0.6741803884506226    |
| node_24: feature_name=cg17115147                        | feature_id[1434].value <=<br>threshold=0.2961975038051605  |
| node_25: feature_name=cg24474622                        | feature_id[2737].value ><br>threshold=0.7211934924125671   |
| node_29: feature_name=cg10472711                        | feature_id[612].value ><br>threshold=0.45985929667949677   |
| node_37: feature_name=cg01937669                        | feature_id[188].value <=<br>threshold=0.4809463769197464   |
| node_38: feature_name=cg02157052                        | feature_id[451].value <=<br>threshold=0.2869153320789337   |
| node_39: feature_name=cg18751958                        | feature_id[1427].value ><br>threshold=0.4813787043094635   |

|                                         |                                                            |
|-----------------------------------------|------------------------------------------------------------|
| node_41: feature_name=cg22512847        | feature_id[1152].value ><br>threshold=0.5129324495792389   |
| node_43: feature_name=cg23345038        | feature_id[1147].value ><br>threshold=0.6318148374557495   |
| node_45: feature_name=cg17439009        | feature_id[1815].value <=<br>threshold=0.48514117300510406 |
| node_46: feature_name=cg17537493        | feature_id[2772].value ><br>threshold=0.5825372636318207   |
| node_52: feature_name=cg01683570        | feature_id[110].value ><br>threshold=0.6040188074111938    |
| node_54: feature_name=cg15720017        | feature_id[168].value ><br>threshold=0.7067741453647614    |
| node_60: feature_name=cg23690444        | feature_id[120].value <=<br>threshold=0.16037724912166595  |
| node_61: feature_name=cg00567872        | feature_id[236].value ><br>threshold=0.7005765736103058    |
| node_85: feature_name=cg01014262        | feature_id[764].value <=<br>threshold=0.5737917125225067   |
| node_86: feature_name=cg22946562        | feature_id[1148].value ><br>threshold=0.6328203976154327   |
| node_134: feature_name=cg14514032       | feature_id[202].value <=<br>threshold=0.4389604330062866   |
| node_135: feature_name=cg13488220       | feature_id[241].value ><br>threshold=0.7352153658866882    |
| node_143: feature_name=cg03840920       | feature_id[256].value <=<br>threshold=0.502630889415741    |
| node_144: feature_name=cg12669088       | feature_id[444].value <=<br>threshold=0.8584775626659393   |
| Class: desmoid-type fibromatosis (DTFM) |                                                            |
|                                         |                                                            |
| Rules_25                                | passed counts:13                                           |
| node_0: feature_name=cg11915444         | feature_id[1171].value ><br>threshold=0.3402601182460785   |
| node_10: feature_name=cg12109728        | feature_id[2810].value ><br>threshold=0.7068270146846771   |
| node_20: feature_name=cg16412000        | feature_id[789].value ><br>threshold=0.6741803884506226    |
| node_24: feature_name=cg17115147        | feature_id[1434].value <=<br>threshold=0.2961975038051605  |
| node_25: feature_name=cg24474622        | feature_id[2737].value ><br>threshold=0.7211934924125671   |
| node_29: feature_name=cg10472711        | feature_id[612].value ><br>threshold=0.45985929667949677   |

|                                                       |                                                            |
|-------------------------------------------------------|------------------------------------------------------------|
| node_37: feature_name=cg01937669                      | feature_id[188].value <=<br>threshold=0.4809463769197464   |
| node_38: feature_name=cg02157052                      | feature_id[451].value <=<br>threshold=0.2869153320789337   |
| node_39: feature_name=cg18751958                      | feature_id[1427].value ><br>threshold=0.4813787043094635   |
| node_41: feature_name=cg22512847                      | feature_id[1152].value ><br>threshold=0.5129324495792389   |
| node_43: feature_name=cg23345038                      | feature_id[1147].value ><br>threshold=0.6318148374557495   |
| node_45: feature_name=cg17439009                      | feature_id[1815].value <=<br>threshold=0.48514117300510406 |
| node_46: feature_name=cg17537493                      | feature_id[2772].value ><br>threshold=0.5825372636318207   |
| node_52: feature_name=cg01683570                      | feature_id[110].value ><br>threshold=0.6040188074111938    |
| node_54: feature_name=cg15720017                      | feature_id[168].value ><br>threshold=0.7067741453647614    |
| node_60: feature_name=cg23690444                      | feature_id[120].value <=<br>threshold=0.16037724912166595  |
| node_61: feature_name=cg00567872                      | feature_id[236].value ><br>threshold=0.7005765736103058    |
| node_85: feature_name=cg01014262                      | feature_id[764].value <=<br>threshold=0.5737917125225067   |
| node_86: feature_name=cg22946562                      | feature_id[1148].value <=<br>threshold=0.6328203976154327  |
| node_87: feature_name=cg18120975                      | feature_id[2767].value <=<br>threshold=0.7081544995307922  |
| node_88: feature_name=cg15592324                      | feature_id[383].value <=<br>threshold=0.9721506536006927   |
| Class: high-grade conventional osteosarcoma (OS (HG)) |                                                            |
|                                                       |                                                            |
| Rules_26                                              | passed counts:12                                           |
| node_0: feature_name=cg11915444                       | feature_id[1171].value ><br>threshold=0.3402601182460785   |
| node_10: feature_name=cg12109728                      | feature_id[2810].value ><br>threshold=0.7068270146846771   |
| node_20: feature_name=cg16412000                      | feature_id[789].value ><br>threshold=0.6741803884506226    |
| node_24: feature_name=cg17115147                      | feature_id[1434].value <=<br>threshold=0.2961975038051605  |

|                                   |                                                            |
|-----------------------------------|------------------------------------------------------------|
| node_25: feature_name=cg24474622  | feature_id[2737].value ><br>threshold=0.7211934924125671   |
| node_29: feature_name=cg10472711  | feature_id[612].value ><br>threshold=0.45985929667949677   |
| node_37: feature_name=cg01937669  | feature_id[188].value <=<br>threshold=0.4809463769197464   |
| node_38: feature_name=cg02157052  | feature_id[451].value <=<br>threshold=0.2869153320789337   |
| node_39: feature_name=cg18751958  | feature_id[1427].value ><br>threshold=0.4813787043094635   |
| node_41: feature_name=cg22512847  | feature_id[1152].value ><br>threshold=0.5129324495792389   |
| node_43: feature_name=cg23345038  | feature_id[1147].value ><br>threshold=0.6318148374557495   |
| node_45: feature_name=cg17439009  | feature_id[1815].value <=<br>threshold=0.48514117300510406 |
| node_46: feature_name=cg17537493  | feature_id[2772].value ><br>threshold=0.5825372636318207   |
| node_52: feature_name=cg01683570  | feature_id[110].value ><br>threshold=0.6040188074111938    |
| node_54: feature_name=cg15720017  | feature_id[168].value ><br>threshold=0.7067741453647614    |
| node_60: feature_name=cg23690444  | feature_id[120].value <=<br>threshold=0.16037724912166595  |
| node_61: feature_name=cg00567872  | feature_id[236].value ><br>threshold=0.7005765736103058    |
| node_85: feature_name=cg01014262  | feature_id[764].value <=<br>threshold=0.5737917125225067   |
| node_86: feature_name=cg22946562  | feature_id[1148].value ><br>threshold=0.6328203976154327   |
| node_134: feature_name=cg14514032 | feature_id[202].value <=<br>threshold=0.4389604330062866   |
| node_135: feature_name=cg13488220 | feature_id[241].value ><br>threshold=0.7352153658866882    |
| node_143: feature_name=cg03840920 | feature_id[256].value ><br>threshold=0.502630889415741     |
| node_147: feature_name=cg13634090 | feature_id[822].value ><br>threshold=0.7207068204879761    |
| node_151: feature_name=cg19584674 | feature_id[2364].value <=<br>threshold=0.41758519411087036 |
| node_152: feature_name=cg07344990 | feature_id[411].value ><br>threshold=0.5484964847564697    |
| node_158: feature_name=cg10298992 | feature_id[3066].value ><br>threshold=0.5707973837852478   |

|                                                  |                                                           |
|--------------------------------------------------|-----------------------------------------------------------|
| node_174: feature_name=cg11843516                | feature_id[20].value <=<br>threshold=0.5590928494930267   |
| node_175: feature_name=cg05185926                | feature_id[448].value ><br>threshold=0.17318664491176605  |
| node_177: feature_name=cg17009731                | feature_id[1220].value ><br>threshold=0.6666513085365295  |
| node_179: feature_name=cg01380319                | feature_id[515].value <=<br>threshold=0.39251960813999176 |
| node_180: feature_name=cg20700977                | feature_id[303].value ><br>threshold=0.8422040641307831   |
| node_184: feature_name=cg24259291                | feature_id[164].value ><br>threshold=0.4872268736362457   |
| node_188: feature_name=cg08097657                | feature_id[67].value ><br>threshold=0.3371318429708481    |
| node_190: feature_name=cg07891483                | feature_id[59].value ><br>threshold=0.6211732923984528    |
| node_194: feature_name=cg20122645                | feature_id[275].value ><br>threshold=0.6094755828380585   |
| node_196: feature_name=cg04026354                | feature_id[1763].value ><br>threshold=0.4341808259487152  |
| node_286: feature_name=cg25408950                | feature_id[772].value <=<br>threshold=0.680083692073822   |
| node_287: feature_name=cg17216243                | feature_id[1006].value <=<br>threshold=0.6291826963424683 |
| Class: inflammatory myofibroblastic tumour (IMT) |                                                           |
|                                                  |                                                           |
| Rules_27                                         | passed counts:12                                          |
| node_0: feature_name=cg11915444                  | feature_id[1171].value ><br>threshold=0.3402601182460785  |
| node_10: feature_name=cg12109728                 | feature_id[2810].value ><br>threshold=0.7068270146846771  |
| node_20: feature_name=cg16412000                 | feature_id[789].value ><br>threshold=0.6741803884506226   |
| node_24: feature_name=cg17115147                 | feature_id[1434].value <=<br>threshold=0.2961975038051605 |
| node_25: feature_name=cg24474622                 | feature_id[2737].value ><br>threshold=0.7211934924125671  |
| node_29: feature_name=cg10472711                 | feature_id[612].value ><br>threshold=0.45985929667949677  |
| node_37: feature_name=cg01937669                 | feature_id[188].value <=<br>threshold=0.4809463769197464  |

|                                   |                                                            |
|-----------------------------------|------------------------------------------------------------|
| node_38: feature_name=cg02157052  | feature_id[451].value <=<br>threshold=0.2869153320789337   |
| node_39: feature_name=cg18751958  | feature_id[1427].value ><br>threshold=0.4813787043094635   |
| node_41: feature_name=cg22512847  | feature_id[1152].value ><br>threshold=0.5129324495792389   |
| node_43: feature_name=cg23345038  | feature_id[1147].value ><br>threshold=0.6318148374557495   |
| node_45: feature_name=cg17439009  | feature_id[1815].value <=<br>threshold=0.48514117300510406 |
| node_46: feature_name=cg17537493  | feature_id[2772].value ><br>threshold=0.5825372636318207   |
| node_52: feature_name=cg01683570  | feature_id[110].value ><br>threshold=0.6040188074111938    |
| node_54: feature_name=cg15720017  | feature_id[168].value ><br>threshold=0.7067741453647614    |
| node_60: feature_name=cg23690444  | feature_id[120].value <=<br>threshold=0.16037724912166595  |
| node_61: feature_name=cg00567872  | feature_id[236].value ><br>threshold=0.7005765736103058    |
| node_85: feature_name=cg01014262  | feature_id[764].value <=<br>threshold=0.5737917125225067   |
| node_86: feature_name=cg22946562  | feature_id[1148].value ><br>threshold=0.6328203976154327   |
| node_134: feature_name=cg14514032 | feature_id[202].value <=<br>threshold=0.4389604330062866   |
| node_135: feature_name=cg13488220 | feature_id[241].value ><br>threshold=0.7352153658866882    |
| node_143: feature_name=cg03840920 | feature_id[256].value ><br>threshold=0.502630889415741     |
| node_147: feature_name=cg13634090 | feature_id[822].value ><br>threshold=0.7207068204879761    |
| node_151: feature_name=cg19584674 | feature_id[2364].value <=<br>threshold=0.41758519411087036 |
| node_152: feature_name=cg07344990 | feature_id[411].value ><br>threshold=0.5484964847564697    |
| node_158: feature_name=cg10298992 | feature_id[3066].value ><br>threshold=0.5707973837852478   |
| node_174: feature_name=cg11843516 | feature_id[20].value <=<br>threshold=0.5590928494930267    |
| node_175: feature_name=cg05185926 | feature_id[448].value ><br>threshold=0.17318664491176605   |
| node_177: feature_name=cg17009731 | feature_id[1220].value ><br>threshold=0.6666513085365295   |



|                                         |                                                           |
|-----------------------------------------|-----------------------------------------------------------|
| node_179: feature_name=cg01380319       | feature_id[515].value <=<br>threshold=0.39251960813999176 |
| node_180: feature_name=cg20700977       | feature_id[303].value ><br>threshold=0.8422040641307831   |
| node_184: feature_name=cg24259291       | feature_id[164].value ><br>threshold=0.4872268736362457   |
| node_188: feature_name=cg08097657       | feature_id[67].value ><br>threshold=0.3371318429708481    |
| node_190: feature_name=cg07891483       | feature_id[59].value ><br>threshold=0.6211732923984528    |
| node_194: feature_name=cg20122645       | feature_id[275].value ><br>threshold=0.6094755828380585   |
| node_196: feature_name=cg04026354       | feature_id[1763].value <=<br>threshold=0.4341808259487152 |
| node_197: feature_name=cg10149889       | feature_id[1017].value ><br>threshold=0.6150195300579071  |
| node_201: feature_name=cg14890730       | feature_id[337].value <=<br>threshold=0.4372602105140686  |
| node_202: feature_name=cg08331427       | feature_id[132].value ><br>threshold=0.5443233847618103   |
| node_208: feature_name=cg22730007       | feature_id[2544].value ><br>threshold=0.28619489073753357 |
| node_210: feature_name=cg17193551       | feature_id[2057].value ><br>threshold=0.4393353909254074  |
| node_212: feature_name=cg14671764       | feature_id[584].value ><br>threshold=0.9353199899196625   |
| node_268: feature_name=cg21377260       | feature_id[534].value ><br>threshold=0.9840706288814545   |
| node_276: feature_name=cg20934096       | feature_id[251].value ><br>threshold=0.7597180306911469   |
| Class: undifferentiated sarcoma (USARC) |                                                           |
|                                         |                                                           |
| Rules_28                                | passed counts:12                                          |
| node_0: feature_name=cg11915444         | feature_id[1171].value ><br>threshold=0.3402601182460785  |
| node_10: feature_name=cg12109728        | feature_id[2810].value ><br>threshold=0.7068270146846771  |
| node_20: feature_name=cg16412000        | feature_id[789].value ><br>threshold=0.6741803884506226   |
| node_24: feature_name=cg17115147        | feature_id[1434].value <=<br>threshold=0.2961975038051605 |
| node_25: feature_name=cg24474622        | feature_id[2737].value ><br>threshold=0.7211934924125671  |

|                                   |                                                            |
|-----------------------------------|------------------------------------------------------------|
| node_29: feature_name=cg10472711  | feature_id[612].value ><br>threshold=0.45985929667949677   |
| node_37: feature_name=cg01937669  | feature_id[188].value <=<br>threshold=0.4809463769197464   |
| node_38: feature_name=cg02157052  | feature_id[451].value <=<br>threshold=0.2869153320789337   |
| node_39: feature_name=cg18751958  | feature_id[1427].value ><br>threshold=0.4813787043094635   |
| node_41: feature_name=cg22512847  | feature_id[1152].value ><br>threshold=0.5129324495792389   |
| node_43: feature_name=cg23345038  | feature_id[1147].value ><br>threshold=0.6318148374557495   |
| node_45: feature_name=cg17439009  | feature_id[1815].value <=<br>threshold=0.48514117300510406 |
| node_46: feature_name=cg17537493  | feature_id[2772].value ><br>threshold=0.5825372636318207   |
| node_52: feature_name=cg01683570  | feature_id[110].value ><br>threshold=0.6040188074111938    |
| node_54: feature_name=cg15720017  | feature_id[168].value ><br>threshold=0.7067741453647614    |
| node_60: feature_name=cg23690444  | feature_id[120].value <=<br>threshold=0.16037724912166595  |
| node_61: feature_name=cg00567872  | feature_id[236].value ><br>threshold=0.7005765736103058    |
| node_85: feature_name=cg01014262  | feature_id[764].value <=<br>threshold=0.5737917125225067   |
| node_86: feature_name=cg22946562  | feature_id[1148].value ><br>threshold=0.6328203976154327   |
| node_134: feature_name=cg14514032 | feature_id[202].value <=<br>threshold=0.4389604330062866   |
| node_135: feature_name=cg13488220 | feature_id[241].value ><br>threshold=0.7352153658866882    |
| node_143: feature_name=cg03840920 | feature_id[256].value ><br>threshold=0.502630889415741     |
| node_147: feature_name=cg13634090 | feature_id[822].value <=<br>threshold=0.7207068204879761   |
| node_148: feature_name=cg21698310 | feature_id[178].value ><br>threshold=0.07961717247962952   |
| Class: fibrous dysplasia (FDY)    |                                                            |
| Rules_29                          | passed counts:11                                           |
| node_0: feature_name=cg11915444   | feature_id[1171].value ><br>threshold=0.3402601182460785   |

|                                                |                                                            |
|------------------------------------------------|------------------------------------------------------------|
| node_10: feature_name=cg12109728               | feature_id[2810].value ><br>threshold=0.7068270146846771   |
| node_20: feature_name=cg16412000               | feature_id[789].value ><br>threshold=0.6741803884506226    |
| node_24: feature_name=cg17115147               | feature_id[1434].value <=<br>threshold=0.2961975038051605  |
| node_25: feature_name=cg24474622               | feature_id[2737].value ><br>threshold=0.7211934924125671   |
| node_29: feature_name=cg10472711               | feature_id[612].value ><br>threshold=0.45985929667949677   |
| node_37: feature_name=cg01937669               | feature_id[188].value <=<br>threshold=0.4809463769197464   |
| node_38: feature_name=cg02157052               | feature_id[451].value <=<br>threshold=0.2869153320789337   |
| node_39: feature_name=cg18751958               | feature_id[1427].value ><br>threshold=0.4813787043094635   |
| node_41: feature_name=cg22512847               | feature_id[1152].value ><br>threshold=0.5129324495792389   |
| node_43: feature_name=cg23345038               | feature_id[1147].value ><br>threshold=0.6318148374557495   |
| node_45: feature_name=cg17439009               | feature_id[1815].value <=<br>threshold=0.48514117300510406 |
| node_46: feature_name=cg17537493               | feature_id[2772].value ><br>threshold=0.5825372636318207   |
| node_52: feature_name=cg01683570               | feature_id[110].value ><br>threshold=0.6040188074111938    |
| node_54: feature_name=cg15720017               | feature_id[168].value ><br>threshold=0.7067741453647614    |
| node_60: feature_name=cg23690444               | feature_id[120].value <=<br>threshold=0.16037724912166595  |
| node_61: feature_name=cg00567872               | feature_id[236].value ><br>threshold=0.7005765736103058    |
| node_85: feature_name=cg01014262               | feature_id[764].value <=<br>threshold=0.5737917125225067   |
| node_86: feature_name=cg22946562               | feature_id[1148].value ><br>threshold=0.6328203976154327   |
| node_134: feature_name=cg14514032              | feature_id[202].value ><br>threshold=0.4389604330062866    |
| node_312: feature_name=cg21670987              | feature_id[1509].value <=<br>threshold=0.32477423548698425 |
| node_313: feature_name=cg12939390              | feature_id[143].value <=<br>threshold=0.23070813715457916  |
| Class: clear cell sarcoma of the kidney (CCSK) |                                                            |

|                                   |                                                            |
|-----------------------------------|------------------------------------------------------------|
|                                   |                                                            |
| Rules_30                          | passed counts:11                                           |
| node_0: feature_name=cg11915444   | feature_id[1171].value ><br>threshold=0.3402601182460785   |
| node_10: feature_name=cg12109728  | feature_id[2810].value ><br>threshold=0.7068270146846771   |
| node_20: feature_name=cg16412000  | feature_id[789].value ><br>threshold=0.6741803884506226    |
| node_24: feature_name=cg17115147  | feature_id[1434].value <=<br>threshold=0.2961975038051605  |
| node_25: feature_name=cg24474622  | feature_id[2737].value ><br>threshold=0.7211934924125671   |
| node_29: feature_name=cg10472711  | feature_id[612].value ><br>threshold=0.45985929667949677   |
| node_37: feature_name=cg01937669  | feature_id[188].value <=<br>threshold=0.4809463769197464   |
| node_38: feature_name=cg02157052  | feature_id[451].value <=<br>threshold=0.2869153320789337   |
| node_39: feature_name=cg18751958  | feature_id[1427].value ><br>threshold=0.4813787043094635   |
| node_41: feature_name=cg22512847  | feature_id[1152].value ><br>threshold=0.5129324495792389   |
| node_43: feature_name=cg23345038  | feature_id[1147].value ><br>threshold=0.6318148374557495   |
| node_45: feature_name=cg17439009  | feature_id[1815].value <=<br>threshold=0.48514117300510406 |
| node_46: feature_name=cg17537493  | feature_id[2772].value ><br>threshold=0.5825372636318207   |
| node_52: feature_name=cg01683570  | feature_id[110].value ><br>threshold=0.6040188074111938    |
| node_54: feature_name=cg15720017  | feature_id[168].value ><br>threshold=0.7067741453647614    |
| node_60: feature_name=cg23690444  | feature_id[120].value <=<br>threshold=0.16037724912166595  |
| node_61: feature_name=cg00567872  | feature_id[236].value ><br>threshold=0.7005765736103058    |
| node_85: feature_name=cg01014262  | feature_id[764].value <=<br>threshold=0.5737917125225067   |
| node_86: feature_name=cg22946562  | feature_id[1148].value ><br>threshold=0.6328203976154327   |
| node_134: feature_name=cg14514032 | feature_id[202].value <=<br>threshold=0.4389604330062866   |

|                                            |                                                            |
|--------------------------------------------|------------------------------------------------------------|
| node_135: feature_name=cg13488220          | feature_id[241].value ><br>threshold=0.7352153658866882    |
| node_143: feature_name=cg03840920          | feature_id[256].value ><br>threshold=0.502630889415741     |
| node_147: feature_name=cg13634090          | feature_id[822].value ><br>threshold=0.7207068204879761    |
| node_151: feature_name=cg19584674          | feature_id[2364].value <=<br>threshold=0.41758519411087036 |
| node_152: feature_name=cg07344990          | feature_id[411].value ><br>threshold=0.5484964847564697    |
| node_158: feature_name=cg10298992          | feature_id[3066].value ><br>threshold=0.5707973837852478   |
| node_174: feature_name=cg11843516          | feature_id[20].value ><br>threshold=0.5590928494930267     |
| Class: ossifying fibromyxoid tumour (OFMT) |                                                            |
|                                            |                                                            |
| Rules_31                                   | passed counts:11                                           |
| node_0: feature_name=cg11915444            | feature_id[1171].value ><br>threshold=0.3402601182460785   |
| node_10: feature_name=cg12109728           | feature_id[2810].value ><br>threshold=0.7068270146846771   |
| node_20: feature_name=cg16412000           | feature_id[789].value ><br>threshold=0.6741803884506226    |
| node_24: feature_name=cg17115147           | feature_id[1434].value <=<br>threshold=0.2961975038051605  |
| node_25: feature_name=cg24474622           | feature_id[2737].value ><br>threshold=0.7211934924125671   |
| node_29: feature_name=cg10472711           | feature_id[612].value ><br>threshold=0.45985929667949677   |
| node_37: feature_name=cg01937669           | feature_id[188].value <=<br>threshold=0.4809463769197464   |
| node_38: feature_name=cg02157052           | feature_id[451].value <=<br>threshold=0.2869153320789337   |
| node_39: feature_name=cg18751958           | feature_id[1427].value ><br>threshold=0.4813787043094635   |
| node_41: feature_name=cg22512847           | feature_id[1152].value ><br>threshold=0.5129324495792389   |
| node_43: feature_name=cg23345038           | feature_id[1147].value ><br>threshold=0.6318148374557495   |
| node_45: feature_name=cg17439009           | feature_id[1815].value <=<br>threshold=0.48514117300510406 |
| node_46: feature_name=cg17537493           | feature_id[2772].value ><br>threshold=0.5825372636318207   |

|                                   |                                                            |
|-----------------------------------|------------------------------------------------------------|
| node_52: feature_name=cg01683570  | feature_id[110].value ><br>threshold=0.6040188074111938    |
| node_54: feature_name=cg15720017  | feature_id[168].value ><br>threshold=0.7067741453647614    |
| node_60: feature_name=cg23690444  | feature_id[120].value <=<br>threshold=0.16037724912166595  |
| node_61: feature_name=cg00567872  | feature_id[236].value ><br>threshold=0.7005765736103058    |
| node_85: feature_name=cg01014262  | feature_id[764].value <=<br>threshold=0.5737917125225067   |
| node_86: feature_name=cg22946562  | feature_id[1148].value ><br>threshold=0.6328203976154327   |
| node_134: feature_name=cg14514032 | feature_id[202].value <=<br>threshold=0.4389604330062866   |
| node_135: feature_name=cg13488220 | feature_id[241].value ><br>threshold=0.7352153658866882    |
| node_143: feature_name=cg03840920 | feature_id[256].value ><br>threshold=0.502630889415741     |
| node_147: feature_name=cg13634090 | feature_id[822].value ><br>threshold=0.7207068204879761    |
| node_151: feature_name=cg19584674 | feature_id[2364].value <=<br>threshold=0.41758519411087036 |
| node_152: feature_name=cg07344990 | feature_id[411].value ><br>threshold=0.5484964847564697    |
| node_158: feature_name=cg10298992 | feature_id[3066].value ><br>threshold=0.5707973837852478   |
| node_174: feature_name=cg11843516 | feature_id[20].value <=<br>threshold=0.5590928494930267    |
| node_175: feature_name=cg05185926 | feature_id[448].value ><br>threshold=0.17318664491176605   |
| node_177: feature_name=cg17009731 | feature_id[1220].value ><br>threshold=0.6666513085365295   |
| node_179: feature_name=cg01380319 | feature_id[515].value <=<br>threshold=0.39251960813999176  |
| node_180: feature_name=cg20700977 | feature_id[303].value ><br>threshold=0.8422040641307831    |
| node_184: feature_name=cg24259291 | feature_id[164].value ><br>threshold=0.4872268736362457    |
| node_188: feature_name=cg08097657 | feature_id[67].value ><br>threshold=0.3371318429708481     |
| node_190: feature_name=cg07891483 | feature_id[59].value ><br>threshold=0.6211732923984528     |
| node_194: feature_name=cg20122645 | feature_id[275].value ><br>threshold=0.6094755828380585    |

|                                               |                                                            |
|-----------------------------------------------|------------------------------------------------------------|
| node_196: feature_name=cg04026354             | feature_id[1763].value ><br>threshold=0.4341808259487152   |
| node_286: feature_name=cg25408950             | feature_id[772].value ><br>threshold=0.680083692073822     |
| node_290: feature_name=cg15188939             | feature_id[1626].value <=<br>threshold=0.6365727782249451  |
| node_291: feature_name=cg23421128             | feature_id[1104].value ><br>threshold=0.14253754168748856  |
| Class: angiomatoid fibrous histiocytoma (AFH) |                                                            |
|                                               |                                                            |
| Rules_32                                      | passed counts:10                                           |
| node_0: feature_name=cg11915444               | feature_id[1171].value ><br>threshold=0.3402601182460785   |
| node_10: feature_name=cg12109728              | feature_id[2810].value ><br>threshold=0.7068270146846771   |
| node_20: feature_name=cg16412000              | feature_id[789].value ><br>threshold=0.6741803884506226    |
| node_24: feature_name=cg17115147              | feature_id[1434].value <=<br>threshold=0.2961975038051605  |
| node_25: feature_name=cg24474622              | feature_id[2737].value ><br>threshold=0.7211934924125671   |
| node_29: feature_name=cg10472711              | feature_id[612].value ><br>threshold=0.45985929667949677   |
| node_37: feature_name=cg01937669              | feature_id[188].value <=<br>threshold=0.4809463769197464   |
| node_38: feature_name=cg02157052              | feature_id[451].value <=<br>threshold=0.2869153320789337   |
| node_39: feature_name=cg18751958              | feature_id[1427].value ><br>threshold=0.4813787043094635   |
| node_41: feature_name=cg22512847              | feature_id[1152].value ><br>threshold=0.5129324495792389   |
| node_43: feature_name=cg23345038              | feature_id[1147].value ><br>threshold=0.6318148374557495   |
| node_45: feature_name=cg17439009              | feature_id[1815].value <=<br>threshold=0.48514117300510406 |
| node_46: feature_name=cg17537493              | feature_id[2772].value ><br>threshold=0.5825372636318207   |
| node_52: feature_name=cg01683570              | feature_id[110].value ><br>threshold=0.6040188074111938    |
| node_54: feature_name=cg15720017              | feature_id[168].value ><br>threshold=0.7067741453647614    |
| node_60: feature_name=cg23690444              | feature_id[120].value <=<br>threshold=0.16037724912166595  |

|                                         |                                                            |
|-----------------------------------------|------------------------------------------------------------|
| node_61: feature_name=cg00567872        | feature_id[236].value ><br>threshold=0.7005765736103058    |
| node_85: feature_name=cg01014262        | feature_id[764].value <=<br>threshold=0.5737917125225067   |
| node_86: feature_name=cg22946562        | feature_id[1148].value ><br>threshold=0.6328203976154327   |
| node_134: feature_name=cg14514032       | feature_id[202].value <=<br>threshold=0.4389604330062866   |
| node_135: feature_name=cg13488220       | feature_id[241].value ><br>threshold=0.7352153658866882    |
| node_143: feature_name=cg03840920       | feature_id[256].value ><br>threshold=0.502630889415741     |
| node_147: feature_name=cg13634090       | feature_id[822].value ><br>threshold=0.7207068204879761    |
| node_151: feature_name=cg19584674       | feature_id[2364].value <=<br>threshold=0.41758519411087036 |
| node_152: feature_name=cg07344990       | feature_id[411].value ><br>threshold=0.5484964847564697    |
| node_158: feature_name=cg10298992       | feature_id[3066].value ><br>threshold=0.5707973837852478   |
| node_174: feature_name=cg11843516       | feature_id[20].value <=<br>threshold=0.5590928494930267    |
| node_175: feature_name=cg05185926       | feature_id[448].value ><br>threshold=0.17318664491176605   |
| node_177: feature_name=cg17009731       | feature_id[1220].value ><br>threshold=0.6666513085365295   |
| node_179: feature_name=cg01380319       | feature_id[515].value ><br>threshold=0.39251960813999176   |
| Class: giant cell tumour of bone (GCTB) |                                                            |
|                                         |                                                            |
| Rules_33                                | passed counts:10                                           |
| node_0: feature_name=cg11915444         | feature_id[1171].value ><br>threshold=0.3402601182460785   |
| node_10: feature_name=cg12109728        | feature_id[2810].value ><br>threshold=0.7068270146846771   |
| node_20: feature_name=cg16412000        | feature_id[789].value ><br>threshold=0.6741803884506226    |
| node_24: feature_name=cg17115147        | feature_id[1434].value <=<br>threshold=0.2961975038051605  |
| node_25: feature_name=cg24474622        | feature_id[2737].value ><br>threshold=0.7211934924125671   |
| node_29: feature_name=cg10472711        | feature_id[612].value ><br>threshold=0.45985929667949677   |



|                                   |                                                            |
|-----------------------------------|------------------------------------------------------------|
| node_37: feature_name=cg01937669  | feature_id[188].value <=<br>threshold=0.4809463769197464   |
| node_38: feature_name=cg02157052  | feature_id[451].value <=<br>threshold=0.2869153320789337   |
| node_39: feature_name=cg18751958  | feature_id[1427].value ><br>threshold=0.4813787043094635   |
| node_41: feature_name=cg22512847  | feature_id[1152].value ><br>threshold=0.5129324495792389   |
| node_43: feature_name=cg23345038  | feature_id[1147].value ><br>threshold=0.6318148374557495   |
| node_45: feature_name=cg17439009  | feature_id[1815].value <=<br>threshold=0.48514117300510406 |
| node_46: feature_name=cg17537493  | feature_id[2772].value ><br>threshold=0.5825372636318207   |
| node_52: feature_name=cg01683570  | feature_id[110].value ><br>threshold=0.6040188074111938    |
| node_54: feature_name=cg15720017  | feature_id[168].value ><br>threshold=0.7067741453647614    |
| node_60: feature_name=cg23690444  | feature_id[120].value <=<br>threshold=0.16037724912166595  |
| node_61: feature_name=cg00567872  | feature_id[236].value ><br>threshold=0.7005765736103058    |
| node_85: feature_name=cg01014262  | feature_id[764].value <=<br>threshold=0.5737917125225067   |
| node_86: feature_name=cg22946562  | feature_id[1148].value ><br>threshold=0.6328203976154327   |
| node_134: feature_name=cg14514032 | feature_id[202].value <=<br>threshold=0.4389604330062866   |
| node_135: feature_name=cg13488220 | feature_id[241].value ><br>threshold=0.7352153658866882    |
| node_143: feature_name=cg03840920 | feature_id[256].value ><br>threshold=0.502630889415741     |
| node_147: feature_name=cg13634090 | feature_id[822].value ><br>threshold=0.7207068204879761    |
| node_151: feature_name=cg19584674 | feature_id[2364].value <=<br>threshold=0.41758519411087036 |
| node_152: feature_name=cg07344990 | feature_id[411].value ><br>threshold=0.5484964847564697    |
| node_158: feature_name=cg10298992 | feature_id[3066].value ><br>threshold=0.5707973837852478   |
| node_174: feature_name=cg11843516 | feature_id[20].value <=<br>threshold=0.5590928494930267    |
| node_175: feature_name=cg05185926 | feature_id[448].value ><br>threshold=0.17318664491176605   |

|                                   |                                                           |
|-----------------------------------|-----------------------------------------------------------|
| node_177: feature_name=cg17009731 | feature_id[1220].value ><br>threshold=0.6666513085365295  |
| node_179: feature_name=cg01380319 | feature_id[515].value <=<br>threshold=0.39251960813999176 |
| node_180: feature_name=cg20700977 | feature_id[303].value ><br>threshold=0.8422040641307831   |
| node_184: feature_name=cg24259291 | feature_id[164].value ><br>threshold=0.4872268736362457   |
| node_188: feature_name=cg08097657 | feature_id[67].value ><br>threshold=0.3371318429708481    |
| node_190: feature_name=cg07891483 | feature_id[59].value ><br>threshold=0.6211732923984528    |
| node_194: feature_name=cg20122645 | feature_id[275].value ><br>threshold=0.6094755828380585   |
| node_196: feature_name=cg04026354 | feature_id[1763].value <=<br>threshold=0.4341808259487152 |
| node_197: feature_name=cg10149889 | feature_id[1017].value ><br>threshold=0.6150195300579071  |
| node_201: feature_name=cg14890730 | feature_id[337].value ><br>threshold=0.4372602105140686   |
| node_279: feature_name=cg27143703 | feature_id[3174].value ><br>threshold=0.42068085074424744 |
| Class: reactive tissue (REA)      |                                                           |
|                                   |                                                           |
| Rules_34                          | passed counts:10                                          |
| node_0: feature_name=cg11915444   | feature_id[1171].value ><br>threshold=0.3402601182460785  |
| node_10: feature_name=cg12109728  | feature_id[2810].value ><br>threshold=0.7068270146846771  |
| node_20: feature_name=cg16412000  | feature_id[789].value ><br>threshold=0.6741803884506226   |
| node_24: feature_name=cg17115147  | feature_id[1434].value <=<br>threshold=0.2961975038051605 |
| node_25: feature_name=cg24474622  | feature_id[2737].value ><br>threshold=0.7211934924125671  |
| node_29: feature_name=cg10472711  | feature_id[612].value ><br>threshold=0.45985929667949677  |
| node_37: feature_name=cg01937669  | feature_id[188].value <=<br>threshold=0.4809463769197464  |
| node_38: feature_name=cg02157052  | feature_id[451].value <=<br>threshold=0.2869153320789337  |
| node_39: feature_name=cg18751958  | feature_id[1427].value ><br>threshold=0.4813787043094635  |

|                                   |                                                            |
|-----------------------------------|------------------------------------------------------------|
| node_41: feature_name=cg22512847  | feature_id[1152].value ><br>threshold=0.5129324495792389   |
| node_43: feature_name=cg23345038  | feature_id[1147].value ><br>threshold=0.6318148374557495   |
| node_45: feature_name=cg17439009  | feature_id[1815].value <=<br>threshold=0.48514117300510406 |
| node_46: feature_name=cg17537493  | feature_id[2772].value ><br>threshold=0.5825372636318207   |
| node_52: feature_name=cg01683570  | feature_id[110].value ><br>threshold=0.6040188074111938    |
| node_54: feature_name=cg15720017  | feature_id[168].value ><br>threshold=0.7067741453647614    |
| node_60: feature_name=cg23690444  | feature_id[120].value <=<br>threshold=0.16037724912166595  |
| node_61: feature_name=cg00567872  | feature_id[236].value ><br>threshold=0.7005765736103058    |
| node_85: feature_name=cg01014262  | feature_id[764].value <=<br>threshold=0.5737917125225067   |
| node_86: feature_name=cg22946562  | feature_id[1148].value ><br>threshold=0.6328203976154327   |
| node_134: feature_name=cg14514032 | feature_id[202].value <=<br>threshold=0.4389604330062866   |
| node_135: feature_name=cg13488220 | feature_id[241].value ><br>threshold=0.7352153658866882    |
| node_143: feature_name=cg03840920 | feature_id[256].value ><br>threshold=0.502630889415741     |
| node_147: feature_name=cg13634090 | feature_id[822].value ><br>threshold=0.7207068204879761    |
| node_151: feature_name=cg19584674 | feature_id[2364].value <=<br>threshold=0.41758519411087036 |
| node_152: feature_name=cg07344990 | feature_id[411].value ><br>threshold=0.5484964847564697    |
| node_158: feature_name=cg10298992 | feature_id[3066].value ><br>threshold=0.5707973837852478   |
| node_174: feature_name=cg11843516 | feature_id[20].value <=<br>threshold=0.5590928494930267    |
| node_175: feature_name=cg05185926 | feature_id[448].value ><br>threshold=0.17318664491176605   |
| node_177: feature_name=cg17009731 | feature_id[1220].value ><br>threshold=0.6666513085365295   |
| node_179: feature_name=cg01380319 | feature_id[515].value <=<br>threshold=0.39251960813999176  |
| node_180: feature_name=cg20700977 | feature_id[303].value <=<br>threshold=0.8422040641307831   |

|                                   |                                                            |
|-----------------------------------|------------------------------------------------------------|
| node_181: feature_name=cg06825317 | feature_id[752].value ><br>threshold=0.3880208432674408    |
| Class: leiomyosarcoma (LMS)       |                                                            |
| Rules_35                          | passed counts:10                                           |
| node_0: feature_name=cg11915444   | feature_id[1171].value ><br>threshold=0.3402601182460785   |
| node_10: feature_name=cg12109728  | feature_id[2810].value ><br>threshold=0.7068270146846771   |
| node_20: feature_name=cg16412000  | feature_id[789].value ><br>threshold=0.6741803884506226    |
| node_24: feature_name=cg17115147  | feature_id[1434].value <=<br>threshold=0.2961975038051605  |
| node_25: feature_name=cg24474622  | feature_id[2737].value ><br>threshold=0.7211934924125671   |
| node_29: feature_name=cg10472711  | feature_id[612].value ><br>threshold=0.45985929667949677   |
| node_37: feature_name=cg01937669  | feature_id[188].value <=<br>threshold=0.4809463769197464   |
| node_38: feature_name=cg02157052  | feature_id[451].value <=<br>threshold=0.2869153320789337   |
| node_39: feature_name=cg18751958  | feature_id[1427].value ><br>threshold=0.4813787043094635   |
| node_41: feature_name=cg22512847  | feature_id[1152].value ><br>threshold=0.5129324495792389   |
| node_43: feature_name=cg23345038  | feature_id[1147].value ><br>threshold=0.6318148374557495   |
| node_45: feature_name=cg17439009  | feature_id[1815].value <=<br>threshold=0.48514117300510406 |
| node_46: feature_name=cg17537493  | feature_id[2772].value ><br>threshold=0.5825372636318207   |
| node_52: feature_name=cg01683570  | feature_id[110].value ><br>threshold=0.6040188074111938    |
| node_54: feature_name=cg15720017  | feature_id[168].value ><br>threshold=0.7067741453647614    |
| node_60: feature_name=cg23690444  | feature_id[120].value <=<br>threshold=0.16037724912166595  |
| node_61: feature_name=cg00567872  | feature_id[236].value ><br>threshold=0.7005765736103058    |
| node_85: feature_name=cg01014262  | feature_id[764].value <=<br>threshold=0.5737917125225067   |
| node_86: feature_name=cg22946562  | feature_id[1148].value ><br>threshold=0.6328203976154327   |

|                                                   |                                                            |
|---------------------------------------------------|------------------------------------------------------------|
| node_134: feature_name=cg14514032                 | feature_id[202].value <=<br>threshold=0.4389604330062866   |
| node_135: feature_name=cg13488220                 | feature_id[241].value ><br>threshold=0.7352153658866882    |
| node_143: feature_name=cg03840920                 | feature_id[256].value ><br>threshold=0.502630889415741     |
| node_147: feature_name=cg13634090                 | feature_id[822].value ><br>threshold=0.7207068204879761    |
| node_151: feature_name=cg19584674                 | feature_id[2364].value <=<br>threshold=0.41758519411087036 |
| node_152: feature_name=cg07344990                 | feature_id[411].value ><br>threshold=0.5484964847564697    |
| node_158: feature_name=cg10298992                 | feature_id[3066].value ><br>threshold=0.5707973837852478   |
| node_174: feature_name=cg11843516                 | feature_id[20].value <=<br>threshold=0.5590928494930267    |
| node_175: feature_name=cg05185926                 | feature_id[448].value ><br>threshold=0.17318664491176605   |
| node_177: feature_name=cg17009731                 | feature_id[1220].value <=<br>threshold=0.6666513085365295  |
| Class: extraskeletal myxoid chondrosarcoma (EMCS) |                                                            |
|                                                   |                                                            |
| Rules_36                                          | passed counts:10                                           |
| node_0: feature_name=cg11915444                   | feature_id[1171].value ><br>threshold=0.3402601182460785   |
| node_10: feature_name=cg12109728                  | feature_id[2810].value ><br>threshold=0.7068270146846771   |
| node_20: feature_name=cg16412000                  | feature_id[789].value ><br>threshold=0.6741803884506226    |
| node_24: feature_name=cg17115147                  | feature_id[1434].value <=<br>threshold=0.2961975038051605  |
| node_25: feature_name=cg24474622                  | feature_id[2737].value ><br>threshold=0.7211934924125671   |
| node_29: feature_name=cg10472711                  | feature_id[612].value ><br>threshold=0.45985929667949677   |
| node_37: feature_name=cg01937669                  | feature_id[188].value <=<br>threshold=0.4809463769197464   |
| node_38: feature_name=cg02157052                  | feature_id[451].value <=<br>threshold=0.2869153320789337   |
| node_39: feature_name=cg18751958                  | feature_id[1427].value ><br>threshold=0.4813787043094635   |

|                                   |                                                            |
|-----------------------------------|------------------------------------------------------------|
| node_41: feature_name=cg22512847  | feature_id[1152].value ><br>threshold=0.5129324495792389   |
| node_43: feature_name=cg23345038  | feature_id[1147].value ><br>threshold=0.6318148374557495   |
| node_45: feature_name=cg17439009  | feature_id[1815].value <=<br>threshold=0.48514117300510406 |
| node_46: feature_name=cg17537493  | feature_id[2772].value ><br>threshold=0.5825372636318207   |
| node_52: feature_name=cg01683570  | feature_id[110].value ><br>threshold=0.6040188074111938    |
| node_54: feature_name=cg15720017  | feature_id[168].value ><br>threshold=0.7067741453647614    |
| node_60: feature_name=cg23690444  | feature_id[120].value <=<br>threshold=0.16037724912166595  |
| node_61: feature_name=cg00567872  | feature_id[236].value ><br>threshold=0.7005765736103058    |
| node_85: feature_name=cg01014262  | feature_id[764].value <=<br>threshold=0.5737917125225067   |
| node_86: feature_name=cg22946562  | feature_id[1148].value ><br>threshold=0.6328203976154327   |
| node_134: feature_name=cg14514032 | feature_id[202].value <=<br>threshold=0.4389604330062866   |
| node_135: feature_name=cg13488220 | feature_id[241].value ><br>threshold=0.7352153658866882    |
| node_143: feature_name=cg03840920 | feature_id[256].value ><br>threshold=0.502630889415741     |
| node_147: feature_name=cg13634090 | feature_id[822].value ><br>threshold=0.7207068204879761    |
| node_151: feature_name=cg19584674 | feature_id[2364].value <=<br>threshold=0.41758519411087036 |
| node_152: feature_name=cg07344990 | feature_id[411].value ><br>threshold=0.5484964847564697    |
| node_158: feature_name=cg10298992 | feature_id[3066].value ><br>threshold=0.5707973837852478   |
| node_174: feature_name=cg11843516 | feature_id[20].value <=<br>threshold=0.5590928494930267    |
| node_175: feature_name=cg05185926 | feature_id[448].value <=<br>threshold=0.17318664491176605  |
| Class: control (CTRL)             |                                                            |
| Rules_37                          | passed counts:9                                            |
| node_0: feature_name=cg11915444   | feature_id[1171].value ><br>threshold=0.3402601182460785   |

|                                   |                                                            |
|-----------------------------------|------------------------------------------------------------|
| node_10: feature_name=cg12109728  | feature_id[2810].value ><br>threshold=0.7068270146846771   |
| node_20: feature_name=cg16412000  | feature_id[789].value ><br>threshold=0.6741803884506226    |
| node_24: feature_name=cg17115147  | feature_id[1434].value <=<br>threshold=0.2961975038051605  |
| node_25: feature_name=cg24474622  | feature_id[2737].value ><br>threshold=0.7211934924125671   |
| node_29: feature_name=cg10472711  | feature_id[612].value ><br>threshold=0.45985929667949677   |
| node_37: feature_name=cg01937669  | feature_id[188].value <=<br>threshold=0.4809463769197464   |
| node_38: feature_name=cg02157052  | feature_id[451].value <=<br>threshold=0.2869153320789337   |
| node_39: feature_name=cg18751958  | feature_id[1427].value ><br>threshold=0.4813787043094635   |
| node_41: feature_name=cg22512847  | feature_id[1152].value ><br>threshold=0.5129324495792389   |
| node_43: feature_name=cg23345038  | feature_id[1147].value ><br>threshold=0.6318148374557495   |
| node_45: feature_name=cg17439009  | feature_id[1815].value <=<br>threshold=0.48514117300510406 |
| node_46: feature_name=cg17537493  | feature_id[2772].value ><br>threshold=0.5825372636318207   |
| node_52: feature_name=cg01683570  | feature_id[110].value ><br>threshold=0.6040188074111938    |
| node_54: feature_name=cg15720017  | feature_id[168].value ><br>threshold=0.7067741453647614    |
| node_60: feature_name=cg23690444  | feature_id[120].value <=<br>threshold=0.16037724912166595  |
| node_61: feature_name=cg00567872  | feature_id[236].value ><br>threshold=0.7005765736103058    |
| node_85: feature_name=cg01014262  | feature_id[764].value <=<br>threshold=0.5737917125225067   |
| node_86: feature_name=cg22946562  | feature_id[1148].value ><br>threshold=0.6328203976154327   |
| node_134: feature_name=cg14514032 | feature_id[202].value ><br>threshold=0.4389604330062866    |
| node_312: feature_name=cg21670987 | feature_id[1509].value <=<br>threshold=0.32477423548698425 |
| node_313: feature_name=cg12939390 | feature_id[143].value ><br>threshold=0.23070813715457916   |
| node_315: feature_name=cg10907727 | feature_id[284].value <=<br>threshold=0.6596133708953857   |

|                                                          |                                                            |
|----------------------------------------------------------|------------------------------------------------------------|
| Class: high-grade endometrial stromal sarcoma (ESS (HG)) |                                                            |
| Rules_38                                                 | passed counts:9                                            |
| node_0: feature_name=cg11915444                          | feature_id[1171].value ><br>threshold=0.3402601182460785   |
| node_10: feature_name=cg12109728                         | feature_id[2810].value ><br>threshold=0.7068270146846771   |
| node_20: feature_name=cg16412000                         | feature_id[789].value ><br>threshold=0.6741803884506226    |
| node_24: feature_name=cg17115147                         | feature_id[1434].value <=<br>threshold=0.2961975038051605  |
| node_25: feature_name=cg24474622                         | feature_id[2737].value ><br>threshold=0.7211934924125671   |
| node_29: feature_name=cg10472711                         | feature_id[612].value ><br>threshold=0.45985929667949677   |
| node_37: feature_name=cg01937669                         | feature_id[188].value <=<br>threshold=0.4809463769197464   |
| node_38: feature_name=cg02157052                         | feature_id[451].value <=<br>threshold=0.2869153320789337   |
| node_39: feature_name=cg18751958                         | feature_id[1427].value ><br>threshold=0.4813787043094635   |
| node_41: feature_name=cg22512847                         | feature_id[1152].value ><br>threshold=0.5129324495792389   |
| node_43: feature_name=cg23345038                         | feature_id[1147].value ><br>threshold=0.6318148374557495   |
| node_45: feature_name=cg17439009                         | feature_id[1815].value <=<br>threshold=0.48514117300510406 |
| node_46: feature_name=cg17537493                         | feature_id[2772].value ><br>threshold=0.5825372636318207   |
| node_52: feature_name=cg01683570                         | feature_id[110].value ><br>threshold=0.6040188074111938    |
| node_54: feature_name=cg15720017                         | feature_id[168].value ><br>threshold=0.7067741453647614    |
| node_60: feature_name=cg23690444                         | feature_id[120].value <=<br>threshold=0.16037724912166595  |
| node_61: feature_name=cg00567872                         | feature_id[236].value ><br>threshold=0.7005765736103058    |
| node_85: feature_name=cg01014262                         | feature_id[764].value <=<br>threshold=0.5737917125225067   |
| node_86: feature_name=cg22946562                         | feature_id[1148].value ><br>threshold=0.6328203976154327   |



|                                   |                                                            |
|-----------------------------------|------------------------------------------------------------|
| node_134: feature_name=cg14514032 | feature_id[202].value <=<br>threshold=0.4389604330062866   |
| node_135: feature_name=cg13488220 | feature_id[241].value ><br>threshold=0.7352153658866882    |
| node_143: feature_name=cg03840920 | feature_id[256].value ><br>threshold=0.502630889415741     |
| node_147: feature_name=cg13634090 | feature_id[822].value ><br>threshold=0.7207068204879761    |
| node_151: feature_name=cg19584674 | feature_id[2364].value <=<br>threshold=0.41758519411087036 |
| node_152: feature_name=cg07344990 | feature_id[411].value ><br>threshold=0.5484964847564697    |
| node_158: feature_name=cg10298992 | feature_id[3066].value ><br>threshold=0.5707973837852478   |
| node_174: feature_name=cg11843516 | feature_id[20].value <=<br>threshold=0.5590928494930267    |
| node_175: feature_name=cg05185926 | feature_id[448].value ><br>threshold=0.17318664491176605   |
| node_177: feature_name=cg17009731 | feature_id[1220].value ><br>threshold=0.6666513085365295   |
| node_179: feature_name=cg01380319 | feature_id[515].value <=<br>threshold=0.39251960813999176  |
| node_180: feature_name=cg20700977 | feature_id[303].value ><br>threshold=0.8422040641307831    |
| node_184: feature_name=cg24259291 | feature_id[164].value ><br>threshold=0.4872268736362457    |
| node_188: feature_name=cg08097657 | feature_id[67].value ><br>threshold=0.3371318429708481     |
| node_190: feature_name=cg07891483 | feature_id[59].value ><br>threshold=0.6211732923984528     |
| node_194: feature_name=cg20122645 | feature_id[275].value ><br>threshold=0.6094755828380585    |
| node_196: feature_name=cg04026354 | feature_id[1763].value <=<br>threshold=0.4341808259487152  |
| node_197: feature_name=cg10149889 | feature_id[1017].value ><br>threshold=0.6150195300579071   |
| node_201: feature_name=cg14890730 | feature_id[337].value <=<br>threshold=0.4372602105140686   |
| node_202: feature_name=cg08331427 | feature_id[132].value ><br>threshold=0.5443233847618103    |
| node_208: feature_name=cg22730007 | feature_id[2544].value ><br>threshold=0.28619489073753357  |
| node_210: feature_name=cg17193551 | feature_id[2057].value ><br>threshold=0.4393353909254074   |

|                                   |                                                            |
|-----------------------------------|------------------------------------------------------------|
| node_212: feature_name=cg14671764 | feature_id[584].value <=<br>threshold=0.9353199899196625   |
| node_213: feature_name=cg20140662 | feature_id[2044].value ><br>threshold=0.38030287623405457  |
| node_215: feature_name=cg07891483 | feature_id[59].value ><br>threshold=0.829958975315094      |
| node_219: feature_name=cg04884579 | feature_id[1861].value <=<br>threshold=0.6106154918670654  |
| node_220: feature_name=cg25066857 | feature_id[3759].value ><br>threshold=0.8149203658103943   |
| Class: lipoma (LIPO)              |                                                            |
| Rules_39                          | passed counts:9                                            |
| node_0: feature_name=cg11915444   | feature_id[1171].value ><br>threshold=0.3402601182460785   |
| node_10: feature_name=cg12109728  | feature_id[2810].value ><br>threshold=0.7068270146846771   |
| node_20: feature_name=cg16412000  | feature_id[789].value ><br>threshold=0.6741803884506226    |
| node_24: feature_name=cg17115147  | feature_id[1434].value <=<br>threshold=0.2961975038051605  |
| node_25: feature_name=cg24474622  | feature_id[2737].value ><br>threshold=0.7211934924125671   |
| node_29: feature_name=cg10472711  | feature_id[612].value ><br>threshold=0.45985929667949677   |
| node_37: feature_name=cg01937669  | feature_id[188].value <=<br>threshold=0.4809463769197464   |
| node_38: feature_name=cg02157052  | feature_id[451].value <=<br>threshold=0.2869153320789337   |
| node_39: feature_name=cg18751958  | feature_id[1427].value ><br>threshold=0.4813787043094635   |
| node_41: feature_name=cg22512847  | feature_id[1152].value ><br>threshold=0.5129324495792389   |
| node_43: feature_name=cg23345038  | feature_id[1147].value ><br>threshold=0.6318148374557495   |
| node_45: feature_name=cg17439009  | feature_id[1815].value <=<br>threshold=0.48514117300510406 |
| node_46: feature_name=cg17537493  | feature_id[2772].value ><br>threshold=0.5825372636318207   |
| node_52: feature_name=cg01683570  | feature_id[110].value ><br>threshold=0.6040188074111938    |
| node_54: feature_name=cg15720017  | feature_id[168].value ><br>threshold=0.7067741453647614    |

|                                   |                                                            |
|-----------------------------------|------------------------------------------------------------|
| node_60: feature_name=cg23690444  | feature_id[120].value <=<br>threshold=0.16037724912166595  |
| node_61: feature_name=cg00567872  | feature_id[236].value ><br>threshold=0.7005765736103058    |
| node_85: feature_name=cg01014262  | feature_id[764].value <=<br>threshold=0.5737917125225067   |
| node_86: feature_name=cg22946562  | feature_id[1148].value ><br>threshold=0.6328203976154327   |
| node_134: feature_name=cg14514032 | feature_id[202].value <=<br>threshold=0.4389604330062866   |
| node_135: feature_name=cg13488220 | feature_id[241].value ><br>threshold=0.7352153658866882    |
| node_143: feature_name=cg03840920 | feature_id[256].value ><br>threshold=0.502630889415741     |
| node_147: feature_name=cg13634090 | feature_id[822].value ><br>threshold=0.7207068204879761    |
| node_151: feature_name=cg19584674 | feature_id[2364].value <=<br>threshold=0.41758519411087036 |
| node_152: feature_name=cg07344990 | feature_id[411].value ><br>threshold=0.5484964847564697    |
| node_158: feature_name=cg10298992 | feature_id[3066].value ><br>threshold=0.5707973837852478   |
| node_174: feature_name=cg11843516 | feature_id[20].value <=<br>threshold=0.5590928494930267    |
| node_175: feature_name=cg05185926 | feature_id[448].value ><br>threshold=0.17318664491176605   |
| node_177: feature_name=cg17009731 | feature_id[1220].value ><br>threshold=0.6666513085365295   |
| node_179: feature_name=cg01380319 | feature_id[515].value <=<br>threshold=0.39251960813999176  |
| node_180: feature_name=cg20700977 | feature_id[303].value ><br>threshold=0.8422040641307831    |
| node_184: feature_name=cg24259291 | feature_id[164].value ><br>threshold=0.4872268736362457    |
| node_188: feature_name=cg08097657 | feature_id[67].value ><br>threshold=0.3371318429708481     |
| node_190: feature_name=cg07891483 | feature_id[59].value ><br>threshold=0.6211732923984528     |
| node_194: feature_name=cg20122645 | feature_id[275].value ><br>threshold=0.6094755828380585    |
| node_196: feature_name=cg04026354 | feature_id[1763].value <=<br>threshold=0.4341808259487152  |
| node_197: feature_name=cg10149889 | feature_id[1017].value ><br>threshold=0.6150195300579071   |

|                                                |                                                            |
|------------------------------------------------|------------------------------------------------------------|
| node_201: feature_name=cg14890730              | feature_id[337].value <=<br>threshold=0.4372602105140686   |
| node_202: feature_name=cg08331427              | feature_id[132].value <=<br>threshold=0.5443233847618103   |
| node_203: feature_name=cg04963697              | feature_id[102].value ><br>threshold=0.7484472692012787    |
| Class: epithelioid haemangioendothelioma (EHE) |                                                            |
| Rules_40                                       | passed counts:9                                            |
| node_0: feature_name=cg11915444                | feature_id[1171].value ><br>threshold=0.3402601182460785   |
| node_10: feature_name=cg12109728               | feature_id[2810].value ><br>threshold=0.7068270146846771   |
| node_20: feature_name=cg16412000               | feature_id[789].value ><br>threshold=0.6741803884506226    |
| node_24: feature_name=cg17115147               | feature_id[1434].value <=<br>threshold=0.2961975038051605  |
| node_25: feature_name=cg24474622               | feature_id[2737].value ><br>threshold=0.7211934924125671   |
| node_29: feature_name=cg10472711               | feature_id[612].value ><br>threshold=0.45985929667949677   |
| node_37: feature_name=cg01937669               | feature_id[188].value <=<br>threshold=0.4809463769197464   |
| node_38: feature_name=cg02157052               | feature_id[451].value <=<br>threshold=0.2869153320789337   |
| node_39: feature_name=cg18751958               | feature_id[1427].value ><br>threshold=0.4813787043094635   |
| node_41: feature_name=cg22512847               | feature_id[1152].value ><br>threshold=0.5129324495792389   |
| node_43: feature_name=cg23345038               | feature_id[1147].value ><br>threshold=0.6318148374557495   |
| node_45: feature_name=cg17439009               | feature_id[1815].value <=<br>threshold=0.48514117300510406 |
| node_46: feature_name=cg17537493               | feature_id[2772].value ><br>threshold=0.5825372636318207   |
| node_52: feature_name=cg01683570               | feature_id[110].value ><br>threshold=0.6040188074111938    |
| node_54: feature_name=cg15720017               | feature_id[168].value ><br>threshold=0.7067741453647614    |
| node_60: feature_name=cg23690444               | feature_id[120].value <=<br>threshold=0.16037724912166595  |
| node_61: feature_name=cg00567872               | feature_id[236].value ><br>threshold=0.7005765736103058    |

|                                   |                                                            |
|-----------------------------------|------------------------------------------------------------|
| node_85: feature_name=cg01014262  | feature_id[764].value <=<br>threshold=0.5737917125225067   |
| node_86: feature_name=cg22946562  | feature_id[1148].value ><br>threshold=0.6328203976154327   |
| node_134: feature_name=cg14514032 | feature_id[202].value <=<br>threshold=0.4389604330062866   |
| node_135: feature_name=cg13488220 | feature_id[241].value ><br>threshold=0.7352153658866882    |
| node_143: feature_name=cg03840920 | feature_id[256].value ><br>threshold=0.502630889415741     |
| node_147: feature_name=cg13634090 | feature_id[822].value ><br>threshold=0.7207068204879761    |
| node_151: feature_name=cg19584674 | feature_id[2364].value <=<br>threshold=0.41758519411087036 |
| node_152: feature_name=cg07344990 | feature_id[411].value ><br>threshold=0.5484964847564697    |
| node_158: feature_name=cg10298992 | feature_id[3066].value ><br>threshold=0.5707973837852478   |
| node_174: feature_name=cg11843516 | feature_id[20].value <=<br>threshold=0.5590928494930267    |
| node_175: feature_name=cg05185926 | feature_id[448].value ><br>threshold=0.17318664491176605   |
| node_177: feature_name=cg17009731 | feature_id[1220].value ><br>threshold=0.6666513085365295   |
| node_179: feature_name=cg01380319 | feature_id[515].value <=<br>threshold=0.39251960813999176  |
| node_180: feature_name=cg20700977 | feature_id[303].value ><br>threshold=0.8422040641307831    |
| node_184: feature_name=cg24259291 | feature_id[164].value ><br>threshold=0.4872268736362457    |
| node_188: feature_name=cg08097657 | feature_id[67].value ><br>threshold=0.3371318429708481     |
| node_190: feature_name=cg07891483 | feature_id[59].value ><br>threshold=0.6211732923984528     |
| node_194: feature_name=cg20122645 | feature_id[275].value ><br>threshold=0.6094755828380585    |
| node_196: feature_name=cg04026354 | feature_id[1763].value <=<br>threshold=0.4341808259487152  |
| node_197: feature_name=cg10149889 | feature_id[1017].value <=<br>threshold=0.6150195300579071  |
| node_198: feature_name=cg16489468 | feature_id[196].value ><br>threshold=0.6215258538722992    |
| Class: nodular fasciitis(NFA)     |                                                            |

|                                   |                                                            |
|-----------------------------------|------------------------------------------------------------|
|                                   |                                                            |
| Rules_41                          | passed counts:9                                            |
| node_0: feature_name=cg11915444   | feature_id[1171].value ><br>threshold=0.3402601182460785   |
| node_10: feature_name=cg12109728  | feature_id[2810].value ><br>threshold=0.7068270146846771   |
| node_20: feature_name=cg16412000  | feature_id[789].value ><br>threshold=0.6741803884506226    |
| node_24: feature_name=cg17115147  | feature_id[1434].value <=<br>threshold=0.2961975038051605  |
| node_25: feature_name=cg24474622  | feature_id[2737].value ><br>threshold=0.7211934924125671   |
| node_29: feature_name=cg10472711  | feature_id[612].value ><br>threshold=0.45985929667949677   |
| node_37: feature_name=cg01937669  | feature_id[188].value <=<br>threshold=0.4809463769197464   |
| node_38: feature_name=cg02157052  | feature_id[451].value <=<br>threshold=0.2869153320789337   |
| node_39: feature_name=cg18751958  | feature_id[1427].value ><br>threshold=0.4813787043094635   |
| node_41: feature_name=cg22512847  | feature_id[1152].value ><br>threshold=0.5129324495792389   |
| node_43: feature_name=cg23345038  | feature_id[1147].value ><br>threshold=0.6318148374557495   |
| node_45: feature_name=cg17439009  | feature_id[1815].value <=<br>threshold=0.48514117300510406 |
| node_46: feature_name=cg17537493  | feature_id[2772].value ><br>threshold=0.5825372636318207   |
| node_52: feature_name=cg01683570  | feature_id[110].value ><br>threshold=0.6040188074111938    |
| node_54: feature_name=cg15720017  | feature_id[168].value ><br>threshold=0.7067741453647614    |
| node_60: feature_name=cg23690444  | feature_id[120].value <=<br>threshold=0.16037724912166595  |
| node_61: feature_name=cg00567872  | feature_id[236].value ><br>threshold=0.7005765736103058    |
| node_85: feature_name=cg01014262  | feature_id[764].value <=<br>threshold=0.5737917125225067   |
| node_86: feature_name=cg22946562  | feature_id[1148].value ><br>threshold=0.6328203976154327   |
| node_134: feature_name=cg14514032 | feature_id[202].value <=<br>threshold=0.4389604330062866   |

|                                   |                                                            |
|-----------------------------------|------------------------------------------------------------|
| node_135: feature_name=cg13488220 | feature_id[241].value ><br>threshold=0.7352153658866882    |
| node_143: feature_name=cg03840920 | feature_id[256].value ><br>threshold=0.502630889415741     |
| node_147: feature_name=cg13634090 | feature_id[822].value ><br>threshold=0.7207068204879761    |
| node_151: feature_name=cg19584674 | feature_id[2364].value <=<br>threshold=0.41758519411087036 |
| node_152: feature_name=cg07344990 | feature_id[411].value ><br>threshold=0.5484964847564697    |
| node_158: feature_name=cg10298992 | feature_id[3066].value ><br>threshold=0.5707973837852478   |
| node_174: feature_name=cg11843516 | feature_id[20].value <=<br>threshold=0.5590928494930267    |
| node_175: feature_name=cg05185926 | feature_id[448].value ><br>threshold=0.17318664491176605   |
| node_177: feature_name=cg17009731 | feature_id[1220].value ><br>threshold=0.6666513085365295   |
| node_179: feature_name=cg01380319 | feature_id[515].value <=<br>threshold=0.39251960813999176  |
| node_180: feature_name=cg20700977 | feature_id[303].value ><br>threshold=0.8422040641307831    |
| node_184: feature_name=cg24259291 | feature_id[164].value ><br>threshold=0.4872268736362457    |
| node_188: feature_name=cg08097657 | feature_id[67].value ><br>threshold=0.3371318429708481     |
| node_190: feature_name=cg07891483 | feature_id[59].value <=<br>threshold=0.6211732923984528    |
| node_191: feature_name=cg23903708 | feature_id[1504].value <=<br>threshold=0.8707234263420105  |
| Class: neurofibroma (NFB)         |                                                            |
|                                   |                                                            |
| Rules_42                          | passed counts:9                                            |
| node_0: feature_name=cg11915444   | feature_id[1171].value ><br>threshold=0.3402601182460785   |
| node_10: feature_name=cg12109728  | feature_id[2810].value ><br>threshold=0.7068270146846771   |
| node_20: feature_name=cg16412000  | feature_id[789].value ><br>threshold=0.6741803884506226    |
| node_24: feature_name=cg17115147  | feature_id[1434].value <=<br>threshold=0.2961975038051605  |
| node_25: feature_name=cg24474622  | feature_id[2737].value ><br>threshold=0.7211934924125671   |

|                                   |                                                            |
|-----------------------------------|------------------------------------------------------------|
| node_29: feature_name=cg10472711  | feature_id[612].value ><br>threshold=0.45985929667949677   |
| node_37: feature_name=cg01937669  | feature_id[188].value <=<br>threshold=0.4809463769197464   |
| node_38: feature_name=cg02157052  | feature_id[451].value <=<br>threshold=0.2869153320789337   |
| node_39: feature_name=cg18751958  | feature_id[1427].value ><br>threshold=0.4813787043094635   |
| node_41: feature_name=cg22512847  | feature_id[1152].value ><br>threshold=0.5129324495792389   |
| node_43: feature_name=cg23345038  | feature_id[1147].value ><br>threshold=0.6318148374557495   |
| node_45: feature_name=cg17439009  | feature_id[1815].value <=<br>threshold=0.48514117300510406 |
| node_46: feature_name=cg17537493  | feature_id[2772].value ><br>threshold=0.5825372636318207   |
| node_52: feature_name=cg01683570  | feature_id[110].value ><br>threshold=0.6040188074111938    |
| node_54: feature_name=cg15720017  | feature_id[168].value ><br>threshold=0.7067741453647614    |
| node_60: feature_name=cg23690444  | feature_id[120].value <=<br>threshold=0.16037724912166595  |
| node_61: feature_name=cg00567872  | feature_id[236].value ><br>threshold=0.7005765736103058    |
| node_85: feature_name=cg01014262  | feature_id[764].value <=<br>threshold=0.5737917125225067   |
| node_86: feature_name=cg22946562  | feature_id[1148].value ><br>threshold=0.6328203976154327   |
| node_134: feature_name=cg14514032 | feature_id[202].value <=<br>threshold=0.4389604330062866   |
| node_135: feature_name=cg13488220 | feature_id[241].value ><br>threshold=0.7352153658866882    |
| node_143: feature_name=cg03840920 | feature_id[256].value ><br>threshold=0.502630889415741     |
| node_147: feature_name=cg13634090 | feature_id[822].value ><br>threshold=0.7207068204879761    |
| node_151: feature_name=cg19584674 | feature_id[2364].value <=<br>threshold=0.41758519411087036 |
| node_152: feature_name=cg07344990 | feature_id[411].value ><br>threshold=0.5484964847564697    |
| node_158: feature_name=cg10298992 | feature_id[3066].value ><br>threshold=0.5707973837852478   |
| node_174: feature_name=cg11843516 | feature_id[20].value <=<br>threshold=0.5590928494930267    |



|                                     |                                                            |
|-------------------------------------|------------------------------------------------------------|
| node_175: feature_name=cg05185926   | feature_id[448].value ><br>threshold=0.17318664491176605   |
| node_177: feature_name=cg17009731   | feature_id[1220].value ><br>threshold=0.6666513085365295   |
| node_179: feature_name=cg01380319   | feature_id[515].value <=<br>threshold=0.39251960813999176  |
| node_180: feature_name=cg20700977   | feature_id[303].value ><br>threshold=0.8422040641307831    |
| node_184: feature_name=cg24259291   | feature_id[164].value ><br>threshold=0.4872268736362457    |
| node_188: feature_name=cg08097657   | feature_id[67].value <=<br>threshold=0.3371318429708481    |
| Class: infantile fibrosarcoma (IFS) |                                                            |
|                                     |                                                            |
| Rules_43                            | passed counts:9                                            |
| node_0: feature_name=cg11915444     | feature_id[1171].value ><br>threshold=0.3402601182460785   |
| node_10: feature_name=cg12109728    | feature_id[2810].value ><br>threshold=0.7068270146846771   |
| node_20: feature_name=cg16412000    | feature_id[789].value ><br>threshold=0.6741803884506226    |
| node_24: feature_name=cg17115147    | feature_id[1434].value <=<br>threshold=0.2961975038051605  |
| node_25: feature_name=cg24474622    | feature_id[2737].value ><br>threshold=0.7211934924125671   |
| node_29: feature_name=cg10472711    | feature_id[612].value ><br>threshold=0.45985929667949677   |
| node_37: feature_name=cg01937669    | feature_id[188].value <=<br>threshold=0.4809463769197464   |
| node_38: feature_name=cg02157052    | feature_id[451].value <=<br>threshold=0.2869153320789337   |
| node_39: feature_name=cg18751958    | feature_id[1427].value ><br>threshold=0.4813787043094635   |
| node_41: feature_name=cg22512847    | feature_id[1152].value ><br>threshold=0.5129324495792389   |
| node_43: feature_name=cg23345038    | feature_id[1147].value ><br>threshold=0.6318148374557495   |
| node_45: feature_name=cg17439009    | feature_id[1815].value <=<br>threshold=0.48514117300510406 |
| node_46: feature_name=cg17537493    | feature_id[2772].value ><br>threshold=0.5825372636318207   |
| node_52: feature_name=cg01683570    | feature_id[110].value ><br>threshold=0.6040188074111938    |

|                                            |                                                            |
|--------------------------------------------|------------------------------------------------------------|
| node_54: feature_name=cg15720017           | feature_id[168].value ><br>threshold=0.7067741453647614    |
| node_60: feature_name=cg23690444           | feature_id[120].value <=<br>threshold=0.16037724912166595  |
| node_61: feature_name=cg00567872           | feature_id[236].value ><br>threshold=0.7005765736103058    |
| node_85: feature_name=cg01014262           | feature_id[764].value <=<br>threshold=0.5737917125225067   |
| node_86: feature_name=cg22946562           | feature_id[1148].value ><br>threshold=0.6328203976154327   |
| node_134: feature_name=cg14514032          | feature_id[202].value <=<br>threshold=0.4389604330062866   |
| node_135: feature_name=cg13488220          | feature_id[241].value ><br>threshold=0.7352153658866882    |
| node_143: feature_name=cg03840920          | feature_id[256].value ><br>threshold=0.502630889415741     |
| node_147: feature_name=cg13634090          | feature_id[822].value ><br>threshold=0.7207068204879761    |
| node_151: feature_name=cg19584674          | feature_id[2364].value <=<br>threshold=0.41758519411087036 |
| node_152: feature_name=cg07344990          | feature_id[411].value ><br>threshold=0.5484964847564697    |
| node_158: feature_name=cg10298992          | feature_id[3066].value ><br>threshold=0.5707973837852478   |
| node_174: feature_name=cg11843516          | feature_id[20].value <=<br>threshold=0.5590928494930267    |
| node_175: feature_name=cg05185926          | feature_id[448].value ><br>threshold=0.17318664491176605   |
| node_177: feature_name=cg17009731          | feature_id[1220].value ><br>threshold=0.6666513085365295   |
| node_179: feature_name=cg01380319          | feature_id[515].value <=<br>threshold=0.39251960813999176  |
| node_180: feature_name=cg20700977          | feature_id[303].value ><br>threshold=0.8422040641307831    |
| node_184: feature_name=cg24259291          | feature_id[164].value <=<br>threshold=0.4872268736362457   |
| node_185: feature_name=cg00512280          | feature_id[1400].value ><br>threshold=0.05498958192765713  |
| Class: Langerhans cell histiocytosis (LCH) |                                                            |
| Rules_44                                   | passed counts:9                                            |
| node_0: feature_name=cg11915444            | feature_id[1171].value ><br>threshold=0.3402601182460785   |

|                                   |                                                            |
|-----------------------------------|------------------------------------------------------------|
| node_10: feature_name=cg12109728  | feature_id[2810].value ><br>threshold=0.7068270146846771   |
| node_20: feature_name=cg16412000  | feature_id[789].value ><br>threshold=0.6741803884506226    |
| node_24: feature_name=cg17115147  | feature_id[1434].value <=<br>threshold=0.2961975038051605  |
| node_25: feature_name=cg24474622  | feature_id[2737].value ><br>threshold=0.7211934924125671   |
| node_29: feature_name=cg10472711  | feature_id[612].value ><br>threshold=0.45985929667949677   |
| node_37: feature_name=cg01937669  | feature_id[188].value <=<br>threshold=0.4809463769197464   |
| node_38: feature_name=cg02157052  | feature_id[451].value <=<br>threshold=0.2869153320789337   |
| node_39: feature_name=cg18751958  | feature_id[1427].value ><br>threshold=0.4813787043094635   |
| node_41: feature_name=cg22512847  | feature_id[1152].value ><br>threshold=0.5129324495792389   |
| node_43: feature_name=cg23345038  | feature_id[1147].value ><br>threshold=0.6318148374557495   |
| node_45: feature_name=cg17439009  | feature_id[1815].value <=<br>threshold=0.48514117300510406 |
| node_46: feature_name=cg17537493  | feature_id[2772].value ><br>threshold=0.5825372636318207   |
| node_52: feature_name=cg01683570  | feature_id[110].value ><br>threshold=0.6040188074111938    |
| node_54: feature_name=cg15720017  | feature_id[168].value ><br>threshold=0.7067741453647614    |
| node_60: feature_name=cg23690444  | feature_id[120].value <=<br>threshold=0.16037724912166595  |
| node_61: feature_name=cg00567872  | feature_id[236].value ><br>threshold=0.7005765736103058    |
| node_85: feature_name=cg01014262  | feature_id[764].value <=<br>threshold=0.5737917125225067   |
| node_86: feature_name=cg22946562  | feature_id[1148].value <=<br>threshold=0.6328203976154327  |
| node_87: feature_name=cg18120975  | feature_id[2767].value ><br>threshold=0.7081544995307922   |
| node_91: feature_name=cg17171539  | feature_id[25].value ><br>threshold=0.501024603843689      |
| node_111: feature_name=cg21241424 | feature_id[1155].value ><br>threshold=0.7665272355079651   |
| Class: melanoma (MEL)             |                                                            |

|                                   |                                                            |
|-----------------------------------|------------------------------------------------------------|
|                                   |                                                            |
| Rules_45                          | passed counts:8                                            |
| node_0: feature_name=cg11915444   | feature_id[1171].value ><br>threshold=0.3402601182460785   |
| node_10: feature_name=cg12109728  | feature_id[2810].value ><br>threshold=0.7068270146846771   |
| node_20: feature_name=cg16412000  | feature_id[789].value ><br>threshold=0.6741803884506226    |
| node_24: feature_name=cg17115147  | feature_id[1434].value <=<br>threshold=0.2961975038051605  |
| node_25: feature_name=cg24474622  | feature_id[2737].value ><br>threshold=0.7211934924125671   |
| node_29: feature_name=cg10472711  | feature_id[612].value ><br>threshold=0.45985929667949677   |
| node_37: feature_name=cg01937669  | feature_id[188].value <=<br>threshold=0.4809463769197464   |
| node_38: feature_name=cg02157052  | feature_id[451].value <=<br>threshold=0.2869153320789337   |
| node_39: feature_name=cg18751958  | feature_id[1427].value ><br>threshold=0.4813787043094635   |
| node_41: feature_name=cg22512847  | feature_id[1152].value ><br>threshold=0.5129324495792389   |
| node_43: feature_name=cg23345038  | feature_id[1147].value ><br>threshold=0.6318148374557495   |
| node_45: feature_name=cg17439009  | feature_id[1815].value <=<br>threshold=0.48514117300510406 |
| node_46: feature_name=cg17537493  | feature_id[2772].value ><br>threshold=0.5825372636318207   |
| node_52: feature_name=cg01683570  | feature_id[110].value ><br>threshold=0.6040188074111938    |
| node_54: feature_name=cg15720017  | feature_id[168].value ><br>threshold=0.7067741453647614    |
| node_60: feature_name=cg23690444  | feature_id[120].value <=<br>threshold=0.16037724912166595  |
| node_61: feature_name=cg00567872  | feature_id[236].value ><br>threshold=0.7005765736103058    |
| node_85: feature_name=cg01014262  | feature_id[764].value <=<br>threshold=0.5737917125225067   |
| node_86: feature_name=cg22946562  | feature_id[1148].value ><br>threshold=0.6328203976154327   |
| node_134: feature_name=cg14514032 | feature_id[202].value <=<br>threshold=0.4389604330062866   |

|                                   |                                                            |
|-----------------------------------|------------------------------------------------------------|
| node_135: feature_name=cg13488220 | feature_id[241].value ><br>threshold=0.7352153658866882    |
| node_143: feature_name=cg03840920 | feature_id[256].value ><br>threshold=0.502630889415741     |
| node_147: feature_name=cg13634090 | feature_id[822].value ><br>threshold=0.7207068204879761    |
| node_151: feature_name=cg19584674 | feature_id[2364].value <=<br>threshold=0.41758519411087036 |
| node_152: feature_name=cg07344990 | feature_id[411].value ><br>threshold=0.5484964847564697    |
| node_158: feature_name=cg10298992 | feature_id[3066].value ><br>threshold=0.5707973837852478   |
| node_174: feature_name=cg11843516 | feature_id[20].value <=<br>threshold=0.5590928494930267    |
| node_175: feature_name=cg05185926 | feature_id[448].value ><br>threshold=0.17318664491176605   |
| node_177: feature_name=cg17009731 | feature_id[1220].value ><br>threshold=0.6666513085365295   |
| node_179: feature_name=cg01380319 | feature_id[515].value <=<br>threshold=0.39251960813999176  |
| node_180: feature_name=cg20700977 | feature_id[303].value ><br>threshold=0.8422040641307831    |
| node_184: feature_name=cg24259291 | feature_id[164].value ><br>threshold=0.4872268736362457    |
| node_188: feature_name=cg08097657 | feature_id[67].value ><br>threshold=0.3371318429708481     |
| node_190: feature_name=cg07891483 | feature_id[59].value ><br>threshold=0.6211732923984528     |
| node_194: feature_name=cg20122645 | feature_id[275].value ><br>threshold=0.6094755828380585    |
| node_196: feature_name=cg04026354 | feature_id[1763].value <=<br>threshold=0.4341808259487152  |
| node_197: feature_name=cg10149889 | feature_id[1017].value ><br>threshold=0.6150195300579071   |
| node_201: feature_name=cg14890730 | feature_id[337].value <=<br>threshold=0.4372602105140686   |
| node_202: feature_name=cg08331427 | feature_id[132].value ><br>threshold=0.5443233847618103    |
| node_208: feature_name=cg22730007 | feature_id[2544].value ><br>threshold=0.28619489073753357  |
| node_210: feature_name=cg17193551 | feature_id[2057].value ><br>threshold=0.4393353909254074   |
| node_212: feature_name=cg14671764 | feature_id[584].value <=<br>threshold=0.9353199899196625   |

|                                   |                                                            |
|-----------------------------------|------------------------------------------------------------|
| node_213: feature_name=cg20140662 | feature_id[2044].value ><br>threshold=0.38030287623405457  |
| node_215: feature_name=cg07891483 | feature_id[59].value ><br>threshold=0.829958975315094      |
| node_219: feature_name=cg04884579 | feature_id[1861].value <=<br>threshold=0.6106154918670654  |
| node_220: feature_name=cg25066857 | feature_id[3759].value <=<br>threshold=0.8149203658103943  |
| node_221: feature_name=cg04813695 | feature_id[1758].value <=<br>threshold=0.8937293887138367  |
| Class: myositis proliferans (MP)  |                                                            |
| Rules_46                          | passed counts:8                                            |
| node_0: feature_name=cg11915444   | feature_id[1171].value ><br>threshold=0.3402601182460785   |
| node_10: feature_name=cg12109728  | feature_id[2810].value ><br>threshold=0.7068270146846771   |
| node_20: feature_name=cg16412000  | feature_id[789].value ><br>threshold=0.6741803884506226    |
| node_24: feature_name=cg17115147  | feature_id[1434].value <=<br>threshold=0.2961975038051605  |
| node_25: feature_name=cg24474622  | feature_id[2737].value ><br>threshold=0.7211934924125671   |
| node_29: feature_name=cg10472711  | feature_id[612].value ><br>threshold=0.45985929667949677   |
| node_37: feature_name=cg01937669  | feature_id[188].value <=<br>threshold=0.4809463769197464   |
| node_38: feature_name=cg02157052  | feature_id[451].value <=<br>threshold=0.2869153320789337   |
| node_39: feature_name=cg18751958  | feature_id[1427].value ><br>threshold=0.4813787043094635   |
| node_41: feature_name=cg22512847  | feature_id[1152].value ><br>threshold=0.5129324495792389   |
| node_43: feature_name=cg23345038  | feature_id[1147].value ><br>threshold=0.6318148374557495   |
| node_45: feature_name=cg17439009  | feature_id[1815].value <=<br>threshold=0.48514117300510406 |
| node_46: feature_name=cg17537493  | feature_id[2772].value ><br>threshold=0.5825372636318207   |
| node_52: feature_name=cg01683570  | feature_id[110].value ><br>threshold=0.6040188074111938    |
| node_54: feature_name=cg15720017  | feature_id[168].value ><br>threshold=0.7067741453647614    |

|                                                      |                                                            |
|------------------------------------------------------|------------------------------------------------------------|
| node_60: feature_name=cg23690444                     | feature_id[120].value <=<br>threshold=0.16037724912166595  |
| node_61: feature_name=cg00567872                     | feature_id[236].value ><br>threshold=0.7005765736103058    |
| node_85: feature_name=cg01014262                     | feature_id[764].value <=<br>threshold=0.5737917125225067   |
| node_86: feature_name=cg22946562                     | feature_id[1148].value ><br>threshold=0.6328203976154327   |
| node_134: feature_name=cg14514032                    | feature_id[202].value <=<br>threshold=0.4389604330062866   |
| node_135: feature_name=cg13488220                    | feature_id[241].value ><br>threshold=0.7352153658866882    |
| node_143: feature_name=cg03840920                    | feature_id[256].value ><br>threshold=0.502630889415741     |
| node_147: feature_name=cg13634090                    | feature_id[822].value ><br>threshold=0.7207068204879761    |
| node_151: feature_name=cg19584674                    | feature_id[2364].value <=<br>threshold=0.41758519411087036 |
| node_152: feature_name=cg07344990                    | feature_id[411].value ><br>threshold=0.5484964847564697    |
| node_158: feature_name=cg10298992                    | feature_id[3066].value ><br>threshold=0.5707973837852478   |
| node_174: feature_name=cg11843516                    | feature_id[20].value <=<br>threshold=0.5590928494930267    |
| node_175: feature_name=cg05185926                    | feature_id[448].value ><br>threshold=0.17318664491176605   |
| node_177: feature_name=cg17009731                    | feature_id[1220].value ><br>threshold=0.6666513085365295   |
| node_179: feature_name=cg01380319                    | feature_id[515].value <=<br>threshold=0.39251960813999176  |
| node_180: feature_name=cg20700977                    | feature_id[303].value ><br>threshold=0.8422040641307831    |
| node_184: feature_name=cg24259291                    | feature_id[164].value ><br>threshold=0.4872268736362457    |
| node_188: feature_name=cg08097657                    | feature_id[67].value ><br>threshold=0.3371318429708481     |
| node_190: feature_name=cg07891483                    | feature_id[59].value ><br>threshold=0.6211732923984528     |
| node_194: feature_name=cg20122645                    | feature_id[275].value <=<br>threshold=0.6094755828380585   |
| Class: cutaneous squamous cell carcinoma (SCC (CUT)) |                                                            |
|                                                      |                                                            |

|                                   |                                                            |
|-----------------------------------|------------------------------------------------------------|
| Rules_47                          | passed counts:7                                            |
| node_0: feature_name=cg11915444   | feature_id[1171].value ><br>threshold=0.3402601182460785   |
| node_10: feature_name=cg12109728  | feature_id[2810].value ><br>threshold=0.7068270146846771   |
| node_20: feature_name=cg16412000  | feature_id[789].value ><br>threshold=0.6741803884506226    |
| node_24: feature_name=cg17115147  | feature_id[1434].value <=<br>threshold=0.2961975038051605  |
| node_25: feature_name=cg24474622  | feature_id[2737].value ><br>threshold=0.7211934924125671   |
| node_29: feature_name=cg10472711  | feature_id[612].value ><br>threshold=0.45985929667949677   |
| node_37: feature_name=cg01937669  | feature_id[188].value <=<br>threshold=0.4809463769197464   |
| node_38: feature_name=cg02157052  | feature_id[451].value <=<br>threshold=0.2869153320789337   |
| node_39: feature_name=cg18751958  | feature_id[1427].value ><br>threshold=0.4813787043094635   |
| node_41: feature_name=cg22512847  | feature_id[1152].value ><br>threshold=0.5129324495792389   |
| node_43: feature_name=cg23345038  | feature_id[1147].value ><br>threshold=0.6318148374557495   |
| node_45: feature_name=cg17439009  | feature_id[1815].value <=<br>threshold=0.48514117300510406 |
| node_46: feature_name=cg17537493  | feature_id[2772].value ><br>threshold=0.5825372636318207   |
| node_52: feature_name=cg01683570  | feature_id[110].value ><br>threshold=0.6040188074111938    |
| node_54: feature_name=cg15720017  | feature_id[168].value ><br>threshold=0.7067741453647614    |
| node_60: feature_name=cg23690444  | feature_id[120].value <=<br>threshold=0.16037724912166595  |
| node_61: feature_name=cg00567872  | feature_id[236].value ><br>threshold=0.7005765736103058    |
| node_85: feature_name=cg01014262  | feature_id[764].value <=<br>threshold=0.5737917125225067   |
| node_86: feature_name=cg22946562  | feature_id[1148].value ><br>threshold=0.6328203976154327   |
| node_134: feature_name=cg14514032 | feature_id[202].value <=<br>threshold=0.4389604330062866   |
| node_135: feature_name=cg13488220 | feature_id[241].value ><br>threshold=0.7352153658866882    |



|                                   |                                                            |
|-----------------------------------|------------------------------------------------------------|
| node_143: feature_name=cg03840920 | feature_id[256].value ><br>threshold=0.502630889415741     |
| node_147: feature_name=cg13634090 | feature_id[822].value ><br>threshold=0.7207068204879761    |
| node_151: feature_name=cg19584674 | feature_id[2364].value <=<br>threshold=0.41758519411087036 |
| node_152: feature_name=cg07344990 | feature_id[411].value ><br>threshold=0.5484964847564697    |
| node_158: feature_name=cg10298992 | feature_id[3066].value ><br>threshold=0.5707973837852478   |
| node_174: feature_name=cg11843516 | feature_id[20].value <=<br>threshold=0.5590928494930267    |
| node_175: feature_name=cg05185926 | feature_id[448].value ><br>threshold=0.17318664491176605   |
| node_177: feature_name=cg17009731 | feature_id[1220].value ><br>threshold=0.6666513085365295   |
| node_179: feature_name=cg01380319 | feature_id[515].value <=<br>threshold=0.39251960813999176  |
| node_180: feature_name=cg20700977 | feature_id[303].value ><br>threshold=0.8422040641307831    |
| node_184: feature_name=cg24259291 | feature_id[164].value ><br>threshold=0.4872268736362457    |
| node_188: feature_name=cg08097657 | feature_id[67].value ><br>threshold=0.3371318429708481     |
| node_190: feature_name=cg07891483 | feature_id[59].value ><br>threshold=0.6211732923984528     |
| node_194: feature_name=cg20122645 | feature_id[275].value ><br>threshold=0.6094755828380585    |
| node_196: feature_name=cg04026354 | feature_id[1763].value <=<br>threshold=0.4341808259487152  |
| node_197: feature_name=cg10149889 | feature_id[1017].value ><br>threshold=0.6150195300579071   |
| node_201: feature_name=cg14890730 | feature_id[337].value <=<br>threshold=0.4372602105140686   |
| node_202: feature_name=cg08331427 | feature_id[132].value ><br>threshold=0.5443233847618103    |
| node_208: feature_name=cg22730007 | feature_id[2544].value ><br>threshold=0.28619489073753357  |
| node_210: feature_name=cg17193551 | feature_id[2057].value ><br>threshold=0.4393353909254074   |
| node_212: feature_name=cg14671764 | feature_id[584].value <=<br>threshold=0.9353199899196625   |
| node_213: feature_name=cg20140662 | feature_id[2044].value ><br>threshold=0.38030287623405457  |

|                                             |                                                            |
|---------------------------------------------|------------------------------------------------------------|
| node_215: feature_name=cg07891483           | feature_id[59].value ><br>threshold=0.829958975315094      |
| node_219: feature_name=cg04884579           | feature_id[1861].value ><br>threshold=0.6106154918670654   |
| node_229: feature_name=cg19548524           | feature_id[2985].value <=<br>threshold=0.8623353838920593  |
| node_230: feature_name=cg18763720           | feature_id[523].value <=<br>threshold=0.3843051791191101   |
| Class: clear cell chondrosarcoma (CSA (CC)) |                                                            |
| Rules_48                                    | passed counts:7                                            |
| node_0: feature_name=cg11915444             | feature_id[1171].value ><br>threshold=0.3402601182460785   |
| node_10: feature_name=cg12109728            | feature_id[2810].value ><br>threshold=0.7068270146846771   |
| node_20: feature_name=cg16412000            | feature_id[789].value ><br>threshold=0.6741803884506226    |
| node_24: feature_name=cg17115147            | feature_id[1434].value <=<br>threshold=0.2961975038051605  |
| node_25: feature_name=cg24474622            | feature_id[2737].value ><br>threshold=0.7211934924125671   |
| node_29: feature_name=cg10472711            | feature_id[612].value ><br>threshold=0.45985929667949677   |
| node_37: feature_name=cg01937669            | feature_id[188].value <=<br>threshold=0.4809463769197464   |
| node_38: feature_name=cg02157052            | feature_id[451].value <=<br>threshold=0.2869153320789337   |
| node_39: feature_name=cg18751958            | feature_id[1427].value ><br>threshold=0.4813787043094635   |
| node_41: feature_name=cg22512847            | feature_id[1152].value ><br>threshold=0.5129324495792389   |
| node_43: feature_name=cg23345038            | feature_id[1147].value ><br>threshold=0.6318148374557495   |
| node_45: feature_name=cg17439009            | feature_id[1815].value <=<br>threshold=0.48514117300510406 |
| node_46: feature_name=cg17537493            | feature_id[2772].value ><br>threshold=0.5825372636318207   |
| node_52: feature_name=cg01683570            | feature_id[110].value ><br>threshold=0.6040188074111938    |
| node_54: feature_name=cg15720017            | feature_id[168].value ><br>threshold=0.7067741453647614    |
| node_60: feature_name=cg23690444            | feature_id[120].value <=<br>threshold=0.16037724912166595  |

|                                   |                                                            |
|-----------------------------------|------------------------------------------------------------|
| node_61: feature_name=cg00567872  | feature_id[236].value ><br>threshold=0.7005765736103058    |
| node_85: feature_name=cg01014262  | feature_id[764].value <=<br>threshold=0.5737917125225067   |
| node_86: feature_name=cg22946562  | feature_id[1148].value ><br>threshold=0.6328203976154327   |
| node_134: feature_name=cg14514032 | feature_id[202].value <=<br>threshold=0.4389604330062866   |
| node_135: feature_name=cg13488220 | feature_id[241].value ><br>threshold=0.7352153658866882    |
| node_143: feature_name=cg03840920 | feature_id[256].value ><br>threshold=0.502630889415741     |
| node_147: feature_name=cg13634090 | feature_id[822].value ><br>threshold=0.7207068204879761    |
| node_151: feature_name=cg19584674 | feature_id[2364].value <=<br>threshold=0.41758519411087036 |
| node_152: feature_name=cg07344990 | feature_id[411].value ><br>threshold=0.5484964847564697    |
| node_158: feature_name=cg10298992 | feature_id[3066].value ><br>threshold=0.5707973837852478   |
| node_174: feature_name=cg11843516 | feature_id[20].value <=<br>threshold=0.5590928494930267    |
| node_175: feature_name=cg05185926 | feature_id[448].value ><br>threshold=0.17318664491176605   |
| node_177: feature_name=cg17009731 | feature_id[1220].value ><br>threshold=0.6666513085365295   |
| node_179: feature_name=cg01380319 | feature_id[515].value <=<br>threshold=0.39251960813999176  |
| node_180: feature_name=cg20700977 | feature_id[303].value ><br>threshold=0.8422040641307831    |
| node_184: feature_name=cg24259291 | feature_id[164].value ><br>threshold=0.4872268736362457    |
| node_188: feature_name=cg08097657 | feature_id[67].value ><br>threshold=0.3371318429708481     |
| node_190: feature_name=cg07891483 | feature_id[59].value ><br>threshold=0.6211732923984528     |
| node_194: feature_name=cg20122645 | feature_id[275].value ><br>threshold=0.6094755828380585    |
| node_196: feature_name=cg04026354 | feature_id[1763].value <=<br>threshold=0.4341808259487152  |
| node_197: feature_name=cg10149889 | feature_id[1017].value ><br>threshold=0.6150195300579071   |
| node_201: feature_name=cg14890730 | feature_id[337].value <=<br>threshold=0.4372602105140686   |

|                                            |                                                            |
|--------------------------------------------|------------------------------------------------------------|
| node_202: feature_name=cg08331427          | feature_id[132].value ><br>threshold=0.5443233847618103    |
| node_208: feature_name=cg22730007          | feature_id[2544].value ><br>threshold=0.28619489073753357  |
| node_210: feature_name=cg17193551          | feature_id[2057].value ><br>threshold=0.4393353909254074   |
| node_212: feature_name=cg14671764          | feature_id[584].value <=<br>threshold=0.9353199899196625   |
| node_213: feature_name=cg20140662          | feature_id[2044].value ><br>threshold=0.38030287623405457  |
| node_215: feature_name=cg07891483          | feature_id[59].value <=<br>threshold=0.829958975315094     |
| node_216: feature_name=cg14487665          | feature_id[3561].value ><br>threshold=0.8762882351875305   |
| Class: plexiform neurofibroma (NFB (PLEX)) |                                                            |
|                                            |                                                            |
| Rules_49                                   | passed counts:7                                            |
| node_0: feature_name=cg11915444            | feature_id[1171].value ><br>threshold=0.3402601182460785   |
| node_10: feature_name=cg12109728           | feature_id[2810].value ><br>threshold=0.7068270146846771   |
| node_20: feature_name=cg16412000           | feature_id[789].value ><br>threshold=0.6741803884506226    |
| node_24: feature_name=cg17115147           | feature_id[1434].value <=<br>threshold=0.2961975038051605  |
| node_25: feature_name=cg24474622           | feature_id[2737].value ><br>threshold=0.7211934924125671   |
| node_29: feature_name=cg10472711           | feature_id[612].value ><br>threshold=0.45985929667949677   |
| node_37: feature_name=cg01937669           | feature_id[188].value <=<br>threshold=0.4809463769197464   |
| node_38: feature_name=cg02157052           | feature_id[451].value <=<br>threshold=0.2869153320789337   |
| node_39: feature_name=cg18751958           | feature_id[1427].value ><br>threshold=0.4813787043094635   |
| node_41: feature_name=cg22512847           | feature_id[1152].value ><br>threshold=0.5129324495792389   |
| node_43: feature_name=cg23345038           | feature_id[1147].value ><br>threshold=0.6318148374557495   |
| node_45: feature_name=cg17439009           | feature_id[1815].value <=<br>threshold=0.48514117300510406 |
| node_46: feature_name=cg17537493           | feature_id[2772].value ><br>threshold=0.5825372636318207   |

|                                   |                                                            |
|-----------------------------------|------------------------------------------------------------|
| node_52: feature_name=cg01683570  | feature_id[110].value ><br>threshold=0.6040188074111938    |
| node_54: feature_name=cg15720017  | feature_id[168].value ><br>threshold=0.7067741453647614    |
| node_60: feature_name=cg23690444  | feature_id[120].value <=<br>threshold=0.16037724912166595  |
| node_61: feature_name=cg00567872  | feature_id[236].value ><br>threshold=0.7005765736103058    |
| node_85: feature_name=cg01014262  | feature_id[764].value <=<br>threshold=0.5737917125225067   |
| node_86: feature_name=cg22946562  | feature_id[1148].value ><br>threshold=0.6328203976154327   |
| node_134: feature_name=cg14514032 | feature_id[202].value <=<br>threshold=0.4389604330062866   |
| node_135: feature_name=cg13488220 | feature_id[241].value ><br>threshold=0.7352153658866882    |
| node_143: feature_name=cg03840920 | feature_id[256].value ><br>threshold=0.502630889415741     |
| node_147: feature_name=cg13634090 | feature_id[822].value ><br>threshold=0.7207068204879761    |
| node_151: feature_name=cg19584674 | feature_id[2364].value <=<br>threshold=0.41758519411087036 |
| node_152: feature_name=cg07344990 | feature_id[411].value ><br>threshold=0.5484964847564697    |
| node_158: feature_name=cg10298992 | feature_id[3066].value ><br>threshold=0.5707973837852478   |
| node_174: feature_name=cg11843516 | feature_id[20].value <=<br>threshold=0.5590928494930267    |
| node_175: feature_name=cg05185926 | feature_id[448].value ><br>threshold=0.17318664491176605   |
| node_177: feature_name=cg17009731 | feature_id[1220].value ><br>threshold=0.6666513085365295   |
| node_179: feature_name=cg01380319 | feature_id[515].value <=<br>threshold=0.39251960813999176  |
| node_180: feature_name=cg20700977 | feature_id[303].value ><br>threshold=0.8422040641307831    |
| node_184: feature_name=cg24259291 | feature_id[164].value ><br>threshold=0.4872268736362457    |
| node_188: feature_name=cg08097657 | feature_id[67].value ><br>threshold=0.3371318429708481     |
| node_190: feature_name=cg07891483 | feature_id[59].value ><br>threshold=0.6211732923984528     |
| node_194: feature_name=cg20122645 | feature_id[275].value ><br>threshold=0.6094755828380585    |

|                                   |                                                            |
|-----------------------------------|------------------------------------------------------------|
| node_196: feature_name=cg04026354 | feature_id[1763].value <=<br>threshold=0.4341808259487152  |
| node_197: feature_name=cg10149889 | feature_id[1017].value ><br>threshold=0.6150195300579071   |
| node_201: feature_name=cg14890730 | feature_id[337].value <=<br>threshold=0.4372602105140686   |
| node_202: feature_name=cg08331427 | feature_id[132].value ><br>threshold=0.5443233847618103    |
| node_208: feature_name=cg22730007 | feature_id[2544].value ><br>threshold=0.28619489073753357  |
| node_210: feature_name=cg17193551 | feature_id[2057].value ><br>threshold=0.4393353909254074   |
| node_212: feature_name=cg14671764 | feature_id[584].value <=<br>threshold=0.9353199899196625   |
| node_213: feature_name=cg20140662 | feature_id[2044].value <=<br>threshold=0.38030287623405457 |
| Class: osteoblastoma (OB)         |                                                            |
|                                   |                                                            |
| Rules_50                          | passed counts:7                                            |
| node_0: feature_name=cg11915444   | feature_id[1171].value ><br>threshold=0.3402601182460785   |
| node_10: feature_name=cg12109728  | feature_id[2810].value ><br>threshold=0.7068270146846771   |
| node_20: feature_name=cg16412000  | feature_id[789].value ><br>threshold=0.6741803884506226    |
| node_24: feature_name=cg17115147  | feature_id[1434].value <=<br>threshold=0.2961975038051605  |
| node_25: feature_name=cg24474622  | feature_id[2737].value ><br>threshold=0.7211934924125671   |
| node_29: feature_name=cg10472711  | feature_id[612].value ><br>threshold=0.45985929667949677   |
| node_37: feature_name=cg01937669  | feature_id[188].value <=<br>threshold=0.4809463769197464   |
| node_38: feature_name=cg02157052  | feature_id[451].value <=<br>threshold=0.2869153320789337   |
| node_39: feature_name=cg18751958  | feature_id[1427].value ><br>threshold=0.4813787043094635   |
| node_41: feature_name=cg22512847  | feature_id[1152].value ><br>threshold=0.5129324495792389   |
| node_43: feature_name=cg23345038  | feature_id[1147].value ><br>threshold=0.6318148374557495   |
| node_45: feature_name=cg17439009  | feature_id[1815].value <=<br>threshold=0.48514117300510406 |

|                                   |                                                            |
|-----------------------------------|------------------------------------------------------------|
| node_46: feature_name=cg17537493  | feature_id[2772].value ><br>threshold=0.5825372636318207   |
| node_52: feature_name=cg01683570  | feature_id[110].value ><br>threshold=0.6040188074111938    |
| node_54: feature_name=cg15720017  | feature_id[168].value ><br>threshold=0.7067741453647614    |
| node_60: feature_name=cg23690444  | feature_id[120].value <=<br>threshold=0.16037724912166595  |
| node_61: feature_name=cg00567872  | feature_id[236].value ><br>threshold=0.7005765736103058    |
| node_85: feature_name=cg01014262  | feature_id[764].value <=<br>threshold=0.5737917125225067   |
| node_86: feature_name=cg22946562  | feature_id[1148].value ><br>threshold=0.6328203976154327   |
| node_134: feature_name=cg14514032 | feature_id[202].value <=<br>threshold=0.4389604330062866   |
| node_135: feature_name=cg13488220 | feature_id[241].value ><br>threshold=0.7352153658866882    |
| node_143: feature_name=cg03840920 | feature_id[256].value ><br>threshold=0.502630889415741     |
| node_147: feature_name=cg13634090 | feature_id[822].value ><br>threshold=0.7207068204879761    |
| node_151: feature_name=cg19584674 | feature_id[2364].value <=<br>threshold=0.41758519411087036 |
| node_152: feature_name=cg07344990 | feature_id[411].value ><br>threshold=0.5484964847564697    |
| node_158: feature_name=cg10298992 | feature_id[3066].value ><br>threshold=0.5707973837852478   |
| node_174: feature_name=cg11843516 | feature_id[20].value <=<br>threshold=0.5590928494930267    |
| node_175: feature_name=cg05185926 | feature_id[448].value ><br>threshold=0.17318664491176605   |
| node_177: feature_name=cg17009731 | feature_id[1220].value ><br>threshold=0.6666513085365295   |
| node_179: feature_name=cg01380319 | feature_id[515].value <=<br>threshold=0.39251960813999176  |
| node_180: feature_name=cg20700977 | feature_id[303].value ><br>threshold=0.8422040641307831    |
| node_184: feature_name=cg24259291 | feature_id[164].value ><br>threshold=0.4872268736362457    |
| node_188: feature_name=cg08097657 | feature_id[67].value ><br>threshold=0.3371318429708481     |
| node_190: feature_name=cg07891483 | feature_id[59].value ><br>threshold=0.6211732923984528     |

|                                              |                                                            |
|----------------------------------------------|------------------------------------------------------------|
| node_194: feature_name=cg20122645            | feature_id[275].value ><br>threshold=0.6094755828380585    |
| node_196: feature_name=cg04026354            | feature_id[1763].value <=<br>threshold=0.4341808259487152  |
| node_197: feature_name=cg10149889            | feature_id[1017].value ><br>threshold=0.6150195300579071   |
| node_201: feature_name=cg14890730            | feature_id[337].value <=<br>threshold=0.4372602105140686   |
| node_202: feature_name=cg08331427            | feature_id[132].value ><br>threshold=0.5443233847618103    |
| node_208: feature_name=cg22730007            | feature_id[2544].value ><br>threshold=0.28619489073753357  |
| node_210: feature_name=cg17193551            | feature_id[2057].value <=<br>threshold=0.4393353909254074  |
| Class: low-grade fibromyxoid sarcoma (LGFMS) |                                                            |
| Rules_51                                     | passed counts:7                                            |
| node_0: feature_name=cg11915444              | feature_id[1171].value ><br>threshold=0.3402601182460785   |
| node_10: feature_name=cg12109728             | feature_id[2810].value ><br>threshold=0.7068270146846771   |
| node_20: feature_name=cg16412000             | feature_id[789].value ><br>threshold=0.6741803884506226    |
| node_24: feature_name=cg17115147             | feature_id[1434].value <=<br>threshold=0.2961975038051605  |
| node_25: feature_name=cg24474622             | feature_id[2737].value ><br>threshold=0.7211934924125671   |
| node_29: feature_name=cg10472711             | feature_id[612].value ><br>threshold=0.45985929667949677   |
| node_37: feature_name=cg01937669             | feature_id[188].value <=<br>threshold=0.4809463769197464   |
| node_38: feature_name=cg02157052             | feature_id[451].value <=<br>threshold=0.2869153320789337   |
| node_39: feature_name=cg18751958             | feature_id[1427].value ><br>threshold=0.4813787043094635   |
| node_41: feature_name=cg22512847             | feature_id[1152].value ><br>threshold=0.5129324495792389   |
| node_43: feature_name=cg23345038             | feature_id[1147].value ><br>threshold=0.6318148374557495   |
| node_45: feature_name=cg17439009             | feature_id[1815].value <=<br>threshold=0.48514117300510406 |
| node_46: feature_name=cg17537493             | feature_id[2772].value ><br>threshold=0.5825372636318207   |



|                                   |                                                            |
|-----------------------------------|------------------------------------------------------------|
| node_52: feature_name=cg01683570  | feature_id[110].value ><br>threshold=0.6040188074111938    |
| node_54: feature_name=cg15720017  | feature_id[168].value ><br>threshold=0.7067741453647614    |
| node_60: feature_name=cg23690444  | feature_id[120].value <=<br>threshold=0.16037724912166595  |
| node_61: feature_name=cg00567872  | feature_id[236].value ><br>threshold=0.7005765736103058    |
| node_85: feature_name=cg01014262  | feature_id[764].value <=<br>threshold=0.5737917125225067   |
| node_86: feature_name=cg22946562  | feature_id[1148].value ><br>threshold=0.6328203976154327   |
| node_134: feature_name=cg14514032 | feature_id[202].value <=<br>threshold=0.4389604330062866   |
| node_135: feature_name=cg13488220 | feature_id[241].value ><br>threshold=0.7352153658866882    |
| node_143: feature_name=cg03840920 | feature_id[256].value ><br>threshold=0.502630889415741     |
| node_147: feature_name=cg13634090 | feature_id[822].value ><br>threshold=0.7207068204879761    |
| node_151: feature_name=cg19584674 | feature_id[2364].value <=<br>threshold=0.41758519411087036 |
| node_152: feature_name=cg07344990 | feature_id[411].value ><br>threshold=0.5484964847564697    |
| node_158: feature_name=cg10298992 | feature_id[3066].value ><br>threshold=0.5707973837852478   |
| node_174: feature_name=cg11843516 | feature_id[20].value <=<br>threshold=0.5590928494930267    |
| node_175: feature_name=cg05185926 | feature_id[448].value ><br>threshold=0.17318664491176605   |
| node_177: feature_name=cg17009731 | feature_id[1220].value ><br>threshold=0.6666513085365295   |
| node_179: feature_name=cg01380319 | feature_id[515].value <=<br>threshold=0.39251960813999176  |
| node_180: feature_name=cg20700977 | feature_id[303].value ><br>threshold=0.8422040641307831    |
| node_184: feature_name=cg24259291 | feature_id[164].value ><br>threshold=0.4872268736362457    |
| node_188: feature_name=cg08097657 | feature_id[67].value ><br>threshold=0.3371318429708481     |
| node_190: feature_name=cg07891483 | feature_id[59].value ><br>threshold=0.6211732923984528     |
| node_194: feature_name=cg20122645 | feature_id[275].value ><br>threshold=0.6094755828380585    |

|                                                  |                                                            |
|--------------------------------------------------|------------------------------------------------------------|
| node_196: feature_name=cg04026354                | feature_id[1763].value <=<br>threshold=0.4341808259487152  |
| node_197: feature_name=cg10149889                | feature_id[1017].value ><br>threshold=0.6150195300579071   |
| node_201: feature_name=cg14890730                | feature_id[337].value <=<br>threshold=0.4372602105140686   |
| node_202: feature_name=cg08331427                | feature_id[132].value ><br>threshold=0.5443233847618103    |
| node_208: feature_name=cg22730007                | feature_id[2544].value <=<br>threshold=0.28619489073753357 |
| Class: mesenchymal chondrosarcoma (CSA<br>(MES)) |                                                            |
|                                                  |                                                            |
| Rules_52                                         | passed counts:7                                            |
| node_0: feature_name=cg11915444                  | feature_id[1171].value ><br>threshold=0.3402601182460785   |
| node_10: feature_name=cg12109728                 | feature_id[2810].value ><br>threshold=0.7068270146846771   |
| node_20: feature_name=cg16412000                 | feature_id[789].value ><br>threshold=0.6741803884506226    |
| node_24: feature_name=cg17115147                 | feature_id[1434].value <=<br>threshold=0.2961975038051605  |
| node_25: feature_name=cg24474622                 | feature_id[2737].value ><br>threshold=0.7211934924125671   |
| node_29: feature_name=cg10472711                 | feature_id[612].value ><br>threshold=0.45985929667949677   |
| node_37: feature_name=cg01937669                 | feature_id[188].value <=<br>threshold=0.4809463769197464   |
| node_38: feature_name=cg02157052                 | feature_id[451].value <=<br>threshold=0.2869153320789337   |
| node_39: feature_name=cg18751958                 | feature_id[1427].value ><br>threshold=0.4813787043094635   |
| node_41: feature_name=cg22512847                 | feature_id[1152].value ><br>threshold=0.5129324495792389   |
| node_43: feature_name=cg23345038                 | feature_id[1147].value ><br>threshold=0.6318148374557495   |
| node_45: feature_name=cg17439009                 | feature_id[1815].value <=<br>threshold=0.48514117300510406 |
| node_46: feature_name=cg17537493                 | feature_id[2772].value ><br>threshold=0.5825372636318207   |
| node_52: feature_name=cg01683570                 | feature_id[110].value ><br>threshold=0.6040188074111938    |

|                                   |                                                            |
|-----------------------------------|------------------------------------------------------------|
| node_54: feature_name=cg15720017  | feature_id[168].value ><br>threshold=0.7067741453647614    |
| node_60: feature_name=cg23690444  | feature_id[120].value <=<br>threshold=0.16037724912166595  |
| node_61: feature_name=cg00567872  | feature_id[236].value ><br>threshold=0.7005765736103058    |
| node_85: feature_name=cg01014262  | feature_id[764].value <=<br>threshold=0.5737917125225067   |
| node_86: feature_name=cg22946562  | feature_id[1148].value ><br>threshold=0.6328203976154327   |
| node_134: feature_name=cg14514032 | feature_id[202].value <=<br>threshold=0.4389604330062866   |
| node_135: feature_name=cg13488220 | feature_id[241].value ><br>threshold=0.7352153658866882    |
| node_143: feature_name=cg03840920 | feature_id[256].value ><br>threshold=0.502630889415741     |
| node_147: feature_name=cg13634090 | feature_id[822].value ><br>threshold=0.7207068204879761    |
| node_151: feature_name=cg19584674 | feature_id[2364].value <=<br>threshold=0.41758519411087036 |
| node_152: feature_name=cg07344990 | feature_id[411].value ><br>threshold=0.5484964847564697    |
| node_158: feature_name=cg10298992 | feature_id[3066].value ><br>threshold=0.5707973837852478   |
| node_174: feature_name=cg11843516 | feature_id[20].value <=<br>threshold=0.5590928494930267    |
| node_175: feature_name=cg05185926 | feature_id[448].value ><br>threshold=0.17318664491176605   |
| node_177: feature_name=cg17009731 | feature_id[1220].value ><br>threshold=0.6666513085365295   |
| node_179: feature_name=cg01380319 | feature_id[515].value <=<br>threshold=0.39251960813999176  |
| node_180: feature_name=cg20700977 | feature_id[303].value ><br>threshold=0.8422040641307831    |
| node_184: feature_name=cg24259291 | feature_id[164].value ><br>threshold=0.4872268736362457    |
| node_188: feature_name=cg08097657 | feature_id[67].value ><br>threshold=0.3371318429708481     |
| node_190: feature_name=cg07891483 | feature_id[59].value ><br>threshold=0.6211732923984528     |
| node_194: feature_name=cg20122645 | feature_id[275].value ><br>threshold=0.6094755828380585    |
| node_196: feature_name=cg04026354 | feature_id[1763].value <=<br>threshold=0.4341808259487152  |

|                                   |                                                            |
|-----------------------------------|------------------------------------------------------------|
| node_197: feature_name=cg10149889 | feature_id[1017].value <=<br>threshold=0.6150195300579071  |
| node_198: feature_name=cg16489468 | feature_id[196].value <=<br>threshold=0.6215258538722992   |
| Class: myositis ossificans (MO)   |                                                            |
| Rules_53                          | passed counts:7                                            |
| node_0: feature_name=cg11915444   | feature_id[1171].value ><br>threshold=0.3402601182460785   |
| node_10: feature_name=cg12109728  | feature_id[2810].value ><br>threshold=0.7068270146846771   |
| node_20: feature_name=cg16412000  | feature_id[789].value ><br>threshold=0.6741803884506226    |
| node_24: feature_name=cg17115147  | feature_id[1434].value <=<br>threshold=0.2961975038051605  |
| node_25: feature_name=cg24474622  | feature_id[2737].value ><br>threshold=0.7211934924125671   |
| node_29: feature_name=cg10472711  | feature_id[612].value ><br>threshold=0.45985929667949677   |
| node_37: feature_name=cg01937669  | feature_id[188].value <=<br>threshold=0.4809463769197464   |
| node_38: feature_name=cg02157052  | feature_id[451].value <=<br>threshold=0.2869153320789337   |
| node_39: feature_name=cg18751958  | feature_id[1427].value ><br>threshold=0.4813787043094635   |
| node_41: feature_name=cg22512847  | feature_id[1152].value ><br>threshold=0.5129324495792389   |
| node_43: feature_name=cg23345038  | feature_id[1147].value ><br>threshold=0.6318148374557495   |
| node_45: feature_name=cg17439009  | feature_id[1815].value <=<br>threshold=0.48514117300510406 |
| node_46: feature_name=cg17537493  | feature_id[2772].value ><br>threshold=0.5825372636318207   |
| node_52: feature_name=cg01683570  | feature_id[110].value ><br>threshold=0.6040188074111938    |
| node_54: feature_name=cg15720017  | feature_id[168].value ><br>threshold=0.7067741453647614    |
| node_60: feature_name=cg23690444  | feature_id[120].value <=<br>threshold=0.16037724912166595  |
| node_61: feature_name=cg00567872  | feature_id[236].value ><br>threshold=0.7005765736103058    |
| node_85: feature_name=cg01014262  | feature_id[764].value <=<br>threshold=0.5737917125225067   |

|                                   |                                                            |
|-----------------------------------|------------------------------------------------------------|
| node_86: feature_name=cg22946562  | feature_id[1148].value ><br>threshold=0.6328203976154327   |
| node_134: feature_name=cg14514032 | feature_id[202].value <=<br>threshold=0.4389604330062866   |
| node_135: feature_name=cg13488220 | feature_id[241].value ><br>threshold=0.7352153658866882    |
| node_143: feature_name=cg03840920 | feature_id[256].value ><br>threshold=0.502630889415741     |
| node_147: feature_name=cg13634090 | feature_id[822].value ><br>threshold=0.7207068204879761    |
| node_151: feature_name=cg19584674 | feature_id[2364].value <=<br>threshold=0.41758519411087036 |
| node_152: feature_name=cg07344990 | feature_id[411].value ><br>threshold=0.5484964847564697    |
| node_158: feature_name=cg10298992 | feature_id[3066].value ><br>threshold=0.5707973837852478   |
| node_174: feature_name=cg11843516 | feature_id[20].value <=<br>threshold=0.5590928494930267    |
| node_175: feature_name=cg05185926 | feature_id[448].value ><br>threshold=0.17318664491176605   |
| node_177: feature_name=cg17009731 | feature_id[1220].value ><br>threshold=0.6666513085365295   |
| node_179: feature_name=cg01380319 | feature_id[515].value <=<br>threshold=0.39251960813999176  |
| node_180: feature_name=cg20700977 | feature_id[303].value <=<br>threshold=0.8422040641307831   |
| node_181: feature_name=cg06825317 | feature_id[752].value <=<br>threshold=0.3880208432674408   |
| Class: leiomyoma (LMO)            |                                                            |
|                                   |                                                            |
| Rules_54                          | passed counts:7                                            |
| node_0: feature_name=cg11915444   | feature_id[1171].value ><br>threshold=0.3402601182460785   |
| node_10: feature_name=cg12109728  | feature_id[2810].value ><br>threshold=0.7068270146846771   |
| node_20: feature_name=cg16412000  | feature_id[789].value ><br>threshold=0.6741803884506226    |
| node_24: feature_name=cg17115147  | feature_id[1434].value <=<br>threshold=0.2961975038051605  |
| node_25: feature_name=cg24474622  | feature_id[2737].value ><br>threshold=0.7211934924125671   |
| node_29: feature_name=cg10472711  | feature_id[612].value ><br>threshold=0.45985929667949677   |

|                                   |                                                            |
|-----------------------------------|------------------------------------------------------------|
| node_37: feature_name=cg01937669  | feature_id[188].value <=<br>threshold=0.4809463769197464   |
| node_38: feature_name=cg02157052  | feature_id[451].value <=<br>threshold=0.2869153320789337   |
| node_39: feature_name=cg18751958  | feature_id[1427].value ><br>threshold=0.4813787043094635   |
| node_41: feature_name=cg22512847  | feature_id[1152].value ><br>threshold=0.5129324495792389   |
| node_43: feature_name=cg23345038  | feature_id[1147].value ><br>threshold=0.6318148374557495   |
| node_45: feature_name=cg17439009  | feature_id[1815].value <=<br>threshold=0.48514117300510406 |
| node_46: feature_name=cg17537493  | feature_id[2772].value ><br>threshold=0.5825372636318207   |
| node_52: feature_name=cg01683570  | feature_id[110].value ><br>threshold=0.6040188074111938    |
| node_54: feature_name=cg15720017  | feature_id[168].value ><br>threshold=0.7067741453647614    |
| node_60: feature_name=cg23690444  | feature_id[120].value <=<br>threshold=0.16037724912166595  |
| node_61: feature_name=cg00567872  | feature_id[236].value ><br>threshold=0.7005765736103058    |
| node_85: feature_name=cg01014262  | feature_id[764].value <=<br>threshold=0.5737917125225067   |
| node_86: feature_name=cg22946562  | feature_id[1148].value <=<br>threshold=0.6328203976154327  |
| node_87: feature_name=cg18120975  | feature_id[2767].value ><br>threshold=0.7081544995307922   |
| node_91: feature_name=cg17171539  | feature_id[25].value ><br>threshold=0.501024603843689      |
| node_111: feature_name=cg21241424 | feature_id[1155].value <=<br>threshold=0.7665272355079651  |
| node_112: feature_name=cg21897315 | feature_id[3800].value <=<br>threshold=0.48165470361709595 |
| Class: leiomyosarcoma (LMS)       |                                                            |
|                                   |                                                            |
| Rules_55                          | passed counts:6                                            |
| node_0: feature_name=cg11915444   | feature_id[1171].value ><br>threshold=0.3402601182460785   |
| node_10: feature_name=cg12109728  | feature_id[2810].value ><br>threshold=0.7068270146846771   |
| node_20: feature_name=cg16412000  | feature_id[789].value ><br>threshold=0.6741803884506226    |

|                                             |                                                            |
|---------------------------------------------|------------------------------------------------------------|
| node_24: feature_name=cg17115147            | feature_id[1434].value <=<br>threshold=0.2961975038051605  |
| node_25: feature_name=cg24474622            | feature_id[2737].value ><br>threshold=0.7211934924125671   |
| node_29: feature_name=cg10472711            | feature_id[612].value ><br>threshold=0.45985929667949677   |
| node_37: feature_name=cg01937669            | feature_id[188].value <=<br>threshold=0.4809463769197464   |
| node_38: feature_name=cg02157052            | feature_id[451].value <=<br>threshold=0.2869153320789337   |
| node_39: feature_name=cg18751958            | feature_id[1427].value ><br>threshold=0.4813787043094635   |
| node_41: feature_name=cg22512847            | feature_id[1152].value ><br>threshold=0.5129324495792389   |
| node_43: feature_name=cg23345038            | feature_id[1147].value ><br>threshold=0.6318148374557495   |
| node_45: feature_name=cg17439009            | feature_id[1815].value <=<br>threshold=0.48514117300510406 |
| node_46: feature_name=cg17537493            | feature_id[2772].value ><br>threshold=0.5825372636318207   |
| node_52: feature_name=cg01683570            | feature_id[110].value ><br>threshold=0.6040188074111938    |
| node_54: feature_name=cg15720017            | feature_id[168].value ><br>threshold=0.7067741453647614    |
| node_60: feature_name=cg23690444            | feature_id[120].value <=<br>threshold=0.16037724912166595  |
| node_61: feature_name=cg00567872            | feature_id[236].value ><br>threshold=0.7005765736103058    |
| node_85: feature_name=cg01014262            | feature_id[764].value <=<br>threshold=0.5737917125225067   |
| node_86: feature_name=cg22946562            | feature_id[1148].value ><br>threshold=0.6328203976154327   |
| node_134: feature_name=cg14514032           | feature_id[202].value ><br>threshold=0.4389604330062866    |
| node_312: feature_name=cg21670987           | feature_id[1509].value <=<br>threshold=0.32477423548698425 |
| node_313: feature_name=cg12939390           | feature_id[143].value ><br>threshold=0.23070813715457916   |
| node_315: feature_name=cg10907727           | feature_id[284].value ><br>threshold=0.6596133708953857    |
| node_317: feature_name=cg21241424           | feature_id[1155].value ><br>threshold=0.7687841951847076   |
| Class: small blue round cell tumour (SBRCT) |                                                            |

|                                   |                                                            |
|-----------------------------------|------------------------------------------------------------|
| Rules_56                          | passed counts:6                                            |
| node_0: feature_name=cg11915444   | feature_id[1171].value ><br>threshold=0.3402601182460785   |
| node_10: feature_name=cg12109728  | feature_id[2810].value ><br>threshold=0.7068270146846771   |
| node_20: feature_name=cg16412000  | feature_id[789].value ><br>threshold=0.6741803884506226    |
| node_24: feature_name=cg17115147  | feature_id[1434].value <=<br>threshold=0.2961975038051605  |
| node_25: feature_name=cg24474622  | feature_id[2737].value ><br>threshold=0.7211934924125671   |
| node_29: feature_name=cg10472711  | feature_id[612].value ><br>threshold=0.45985929667949677   |
| node_37: feature_name=cg01937669  | feature_id[188].value <=<br>threshold=0.4809463769197464   |
| node_38: feature_name=cg02157052  | feature_id[451].value <=<br>threshold=0.2869153320789337   |
| node_39: feature_name=cg18751958  | feature_id[1427].value ><br>threshold=0.4813787043094635   |
| node_41: feature_name=cg22512847  | feature_id[1152].value ><br>threshold=0.5129324495792389   |
| node_43: feature_name=cg23345038  | feature_id[1147].value ><br>threshold=0.6318148374557495   |
| node_45: feature_name=cg17439009  | feature_id[1815].value <=<br>threshold=0.48514117300510406 |
| node_46: feature_name=cg17537493  | feature_id[2772].value ><br>threshold=0.5825372636318207   |
| node_52: feature_name=cg01683570  | feature_id[110].value ><br>threshold=0.6040188074111938    |
| node_54: feature_name=cg15720017  | feature_id[168].value ><br>threshold=0.7067741453647614    |
| node_60: feature_name=cg23690444  | feature_id[120].value <=<br>threshold=0.16037724912166595  |
| node_61: feature_name=cg00567872  | feature_id[236].value ><br>threshold=0.7005765736103058    |
| node_85: feature_name=cg01014262  | feature_id[764].value <=<br>threshold=0.5737917125225067   |
| node_86: feature_name=cg22946562  | feature_id[1148].value ><br>threshold=0.6328203976154327   |
| node_134: feature_name=cg14514032 | feature_id[202].value <=<br>threshold=0.4389604330062866   |



|                                   |                                                            |
|-----------------------------------|------------------------------------------------------------|
| node_135: feature_name=cg13488220 | feature_id[241].value ><br>threshold=0.7352153658866882    |
| node_143: feature_name=cg03840920 | feature_id[256].value ><br>threshold=0.502630889415741     |
| node_147: feature_name=cg13634090 | feature_id[822].value ><br>threshold=0.7207068204879761    |
| node_151: feature_name=cg19584674 | feature_id[2364].value <=<br>threshold=0.41758519411087036 |
| node_152: feature_name=cg07344990 | feature_id[411].value ><br>threshold=0.5484964847564697    |
| node_158: feature_name=cg10298992 | feature_id[3066].value ><br>threshold=0.5707973837852478   |
| node_174: feature_name=cg11843516 | feature_id[20].value <=<br>threshold=0.5590928494930267    |
| node_175: feature_name=cg05185926 | feature_id[448].value ><br>threshold=0.17318664491176605   |
| node_177: feature_name=cg17009731 | feature_id[1220].value ><br>threshold=0.6666513085365295   |
| node_179: feature_name=cg01380319 | feature_id[515].value <=<br>threshold=0.39251960813999176  |
| node_180: feature_name=cg20700977 | feature_id[303].value ><br>threshold=0.8422040641307831    |
| node_184: feature_name=cg24259291 | feature_id[164].value ><br>threshold=0.4872268736362457    |
| node_188: feature_name=cg08097657 | feature_id[67].value ><br>threshold=0.3371318429708481     |
| node_190: feature_name=cg07891483 | feature_id[59].value ><br>threshold=0.6211732923984528     |
| node_194: feature_name=cg20122645 | feature_id[275].value ><br>threshold=0.6094755828380585    |
| node_196: feature_name=cg04026354 | feature_id[1763].value <=<br>threshold=0.4341808259487152  |
| node_197: feature_name=cg10149889 | feature_id[1017].value ><br>threshold=0.6150195300579071   |
| node_201: feature_name=cg14890730 | feature_id[337].value <=<br>threshold=0.4372602105140686   |
| node_202: feature_name=cg08331427 | feature_id[132].value ><br>threshold=0.5443233847618103    |
| node_208: feature_name=cg22730007 | feature_id[2544].value ><br>threshold=0.28619489073753357  |
| node_210: feature_name=cg17193551 | feature_id[2057].value ><br>threshold=0.4393353909254074   |
| node_212: feature_name=cg14671764 | feature_id[584].value <=<br>threshold=0.9353199899196625   |

|                                   |                                                            |
|-----------------------------------|------------------------------------------------------------|
| node_213: feature_name=cg20140662 | feature_id[2044].value ><br>threshold=0.38030287623405457  |
| node_215: feature_name=cg07891483 | feature_id[59].value ><br>threshold=0.829958975315094      |
| node_219: feature_name=cg04884579 | feature_id[1861].value ><br>threshold=0.6106154918670654   |
| node_229: feature_name=cg19548524 | feature_id[2985].value ><br>threshold=0.8623353838920593   |
| node_233: feature_name=cg14788686 | feature_id[3556].value <=<br>threshold=0.35090239346027374 |
| Class: sarcoma (SARC)             |                                                            |
| Rules_57                          | passed counts:6                                            |
| node_0: feature_name=cg11915444   | feature_id[1171].value ><br>threshold=0.3402601182460785   |
| node_10: feature_name=cg12109728  | feature_id[2810].value ><br>threshold=0.7068270146846771   |
| node_20: feature_name=cg16412000  | feature_id[789].value ><br>threshold=0.6741803884506226    |
| node_24: feature_name=cg17115147  | feature_id[1434].value <=<br>threshold=0.2961975038051605  |
| node_25: feature_name=cg24474622  | feature_id[2737].value ><br>threshold=0.7211934924125671   |
| node_29: feature_name=cg10472711  | feature_id[612].value ><br>threshold=0.45985929667949677   |
| node_37: feature_name=cg01937669  | feature_id[188].value <=<br>threshold=0.4809463769197464   |
| node_38: feature_name=cg02157052  | feature_id[451].value <=<br>threshold=0.2869153320789337   |
| node_39: feature_name=cg18751958  | feature_id[1427].value ><br>threshold=0.4813787043094635   |
| node_41: feature_name=cg22512847  | feature_id[1152].value ><br>threshold=0.5129324495792389   |
| node_43: feature_name=cg23345038  | feature_id[1147].value ><br>threshold=0.6318148374557495   |
| node_45: feature_name=cg17439009  | feature_id[1815].value <=<br>threshold=0.48514117300510406 |
| node_46: feature_name=cg17537493  | feature_id[2772].value ><br>threshold=0.5825372636318207   |
| node_52: feature_name=cg01683570  | feature_id[110].value ><br>threshold=0.6040188074111938    |
| node_54: feature_name=cg15720017  | feature_id[168].value ><br>threshold=0.7067741453647614    |

|                                   |                                                           |
|-----------------------------------|-----------------------------------------------------------|
| node_60: feature_name=cg23690444  | feature_id[120].value <=<br>threshold=0.16037724912166595 |
| node_61: feature_name=cg00567872  | feature_id[236].value ><br>threshold=0.7005765736103058   |
| node_85: feature_name=cg01014262  | feature_id[764].value <=<br>threshold=0.5737917125225067  |
| node_86: feature_name=cg22946562  | feature_id[1148].value <=<br>threshold=0.6328203976154327 |
| node_87: feature_name=cg18120975  | feature_id[2767].value ><br>threshold=0.7081544995307922  |
| node_91: feature_name=cg17171539  | feature_id[25].value ><br>threshold=0.501024603843689     |
| node_111: feature_name=cg21241424 | feature_id[1155].value <=<br>threshold=0.7665272355079651 |
| node_112: feature_name=cg21897315 | feature_id[3800].value ><br>threshold=0.48165470361709595 |
| node_114: feature_name=cg04375492 | feature_id[2874].value <=<br>threshold=0.7812598049640656 |
| Class: sarcoma (SARC)             |                                                           |
|                                   |                                                           |
| Rules_58                          | passed counts:6                                           |
| node_0: feature_name=cg11915444   | feature_id[1171].value ><br>threshold=0.3402601182460785  |
| node_10: feature_name=cg12109728  | feature_id[2810].value ><br>threshold=0.7068270146846771  |
| node_20: feature_name=cg16412000  | feature_id[789].value ><br>threshold=0.6741803884506226   |
| node_24: feature_name=cg17115147  | feature_id[1434].value <=<br>threshold=0.2961975038051605 |
| node_25: feature_name=cg24474622  | feature_id[2737].value ><br>threshold=0.7211934924125671  |
| node_29: feature_name=cg10472711  | feature_id[612].value ><br>threshold=0.45985929667949677  |
| node_37: feature_name=cg01937669  | feature_id[188].value <=<br>threshold=0.4809463769197464  |
| node_38: feature_name=cg02157052  | feature_id[451].value <=<br>threshold=0.2869153320789337  |
| node_39: feature_name=cg18751958  | feature_id[1427].value ><br>threshold=0.4813787043094635  |
| node_41: feature_name=cg22512847  | feature_id[1152].value ><br>threshold=0.5129324495792389  |
| node_43: feature_name=cg23345038  | feature_id[1147].value ><br>threshold=0.6318148374557495  |

|                                                                         |                                                            |
|-------------------------------------------------------------------------|------------------------------------------------------------|
| node_45: feature_name=cg17439009                                        | feature_id[1815].value <=<br>threshold=0.48514117300510406 |
| node_46: feature_name=cg17537493                                        | feature_id[2772].value ><br>threshold=0.5825372636318207   |
| node_52: feature_name=cg01683570                                        | feature_id[110].value ><br>threshold=0.6040188074111938    |
| node_54: feature_name=cg15720017                                        | feature_id[168].value ><br>threshold=0.7067741453647614    |
| node_60: feature_name=cg23690444                                        | feature_id[120].value <=<br>threshold=0.16037724912166595  |
| node_61: feature_name=cg00567872                                        | feature_id[236].value ><br>threshold=0.7005765736103058    |
| node_85: feature_name=cg01014262                                        | feature_id[764].value <=<br>threshold=0.5737917125225067   |
| node_86: feature_name=cg22946562                                        | feature_id[1148].value <=<br>threshold=0.6328203976154327  |
| node_87: feature_name=cg18120975                                        | feature_id[2767].value ><br>threshold=0.7081544995307922   |
| node_91: feature_name=cg17171539                                        | feature_id[25].value <=<br>threshold=0.501024603843689     |
| node_92: feature_name=cg00007036                                        | feature_id[1586].value <=<br>threshold=0.943472146987915   |
| node_93: feature_name=cg16570314                                        | feature_id[479].value ><br>threshold=0.7333994507789612    |
| Class: atypical fibroxanthoma<br>(AFX)/pleomorphic dermal sarcoma (PDS) |                                                            |
| Rules_59                                                                | passed counts:5                                            |
| node_0: feature_name=cg11915444                                         | feature_id[1171].value ><br>threshold=0.3402601182460785   |
| node_10: feature_name=cg12109728                                        | feature_id[2810].value ><br>threshold=0.7068270146846771   |
| node_20: feature_name=cg16412000                                        | feature_id[789].value ><br>threshold=0.6741803884506226    |
| node_24: feature_name=cg17115147                                        | feature_id[1434].value <=<br>threshold=0.2961975038051605  |
| node_25: feature_name=cg24474622                                        | feature_id[2737].value ><br>threshold=0.7211934924125671   |
| node_29: feature_name=cg10472711                                        | feature_id[612].value ><br>threshold=0.45985929667949677   |
| node_37: feature_name=cg01937669                                        | feature_id[188].value <=<br>threshold=0.4809463769197464   |

|                                   |                                                            |
|-----------------------------------|------------------------------------------------------------|
| node_38: feature_name=cg02157052  | feature_id[451].value ><br>threshold=0.2869153320789337    |
| node_344: feature_name=cg21189849 | feature_id[189].value ><br>threshold=0.7746135592460632    |
| node_348: feature_name=cg06937205 | feature_id[751].value <=<br>threshold=0.4331420361995697   |
| Class: rhabdomyosarcoma (RMS)     |                                                            |
| Rules_60                          | passed counts:5                                            |
| node_0: feature_name=cg11915444   | feature_id[1171].value ><br>threshold=0.3402601182460785   |
| node_10: feature_name=cg12109728  | feature_id[2810].value ><br>threshold=0.7068270146846771   |
| node_20: feature_name=cg16412000  | feature_id[789].value ><br>threshold=0.6741803884506226    |
| node_24: feature_name=cg17115147  | feature_id[1434].value <=<br>threshold=0.2961975038051605  |
| node_25: feature_name=cg24474622  | feature_id[2737].value ><br>threshold=0.7211934924125671   |
| node_29: feature_name=cg10472711  | feature_id[612].value ><br>threshold=0.45985929667949677   |
| node_37: feature_name=cg01937669  | feature_id[188].value <=<br>threshold=0.4809463769197464   |
| node_38: feature_name=cg02157052  | feature_id[451].value <=<br>threshold=0.2869153320789337   |
| node_39: feature_name=cg18751958  | feature_id[1427].value ><br>threshold=0.4813787043094635   |
| node_41: feature_name=cg22512847  | feature_id[1152].value ><br>threshold=0.5129324495792389   |
| node_43: feature_name=cg23345038  | feature_id[1147].value ><br>threshold=0.6318148374557495   |
| node_45: feature_name=cg17439009  | feature_id[1815].value <=<br>threshold=0.48514117300510406 |
| node_46: feature_name=cg17537493  | feature_id[2772].value ><br>threshold=0.5825372636318207   |
| node_52: feature_name=cg01683570  | feature_id[110].value ><br>threshold=0.6040188074111938    |
| node_54: feature_name=cg15720017  | feature_id[168].value ><br>threshold=0.7067741453647614    |
| node_60: feature_name=cg23690444  | feature_id[120].value <=<br>threshold=0.16037724912166595  |
| node_61: feature_name=cg00567872  | feature_id[236].value ><br>threshold=0.7005765736103058    |

|                                                            |                                                            |
|------------------------------------------------------------|------------------------------------------------------------|
| node_85: feature_name=cg01014262                           | feature_id[764].value <=<br>threshold=0.5737917125225067   |
| node_86: feature_name=cg22946562                           | feature_id[1148].value ><br>threshold=0.6328203976154327   |
| node_134: feature_name=cg14514032                          | feature_id[202].value ><br>threshold=0.4389604330062866    |
| node_312: feature_name=cg21670987                          | feature_id[1509].value <=<br>threshold=0.32477423548698425 |
| node_313: feature_name=cg12939390                          | feature_id[143].value ><br>threshold=0.23070813715457916   |
| node_315: feature_name=cg10907727                          | feature_id[284].value ><br>threshold=0.6596133708953857    |
| node_317: feature_name=cg21241424                          | feature_id[1155].value <=<br>threshold=0.7687841951847076  |
| node_318: feature_name=cg19691659                          | feature_id[953].value ><br>threshold=0.6708230972290039    |
| Class: low-grade endometrial stromal sarcoma<br>(ESS (LG)) |                                                            |
|                                                            |                                                            |
| Rules_61                                                   | passed counts:5                                            |
| node_0: feature_name=cg11915444                            | feature_id[1171].value ><br>threshold=0.3402601182460785   |
| node_10: feature_name=cg12109728                           | feature_id[2810].value ><br>threshold=0.7068270146846771   |
| node_20: feature_name=cg16412000                           | feature_id[789].value ><br>threshold=0.6741803884506226    |
| node_24: feature_name=cg17115147                           | feature_id[1434].value <=<br>threshold=0.2961975038051605  |
| node_25: feature_name=cg24474622                           | feature_id[2737].value ><br>threshold=0.7211934924125671   |
| node_29: feature_name=cg10472711                           | feature_id[612].value ><br>threshold=0.45985929667949677   |
| node_37: feature_name=cg01937669                           | feature_id[188].value <=<br>threshold=0.4809463769197464   |
| node_38: feature_name=cg02157052                           | feature_id[451].value <=<br>threshold=0.2869153320789337   |
| node_39: feature_name=cg18751958                           | feature_id[1427].value ><br>threshold=0.4813787043094635   |
| node_41: feature_name=cg22512847                           | feature_id[1152].value ><br>threshold=0.5129324495792389   |
| node_43: feature_name=cg23345038                           | feature_id[1147].value ><br>threshold=0.6318148374557495   |

|                                   |                                                            |
|-----------------------------------|------------------------------------------------------------|
| node_45: feature_name=cg17439009  | feature_id[1815].value <=<br>threshold=0.48514117300510406 |
| node_46: feature_name=cg17537493  | feature_id[2772].value ><br>threshold=0.5825372636318207   |
| node_52: feature_name=cg01683570  | feature_id[110].value ><br>threshold=0.6040188074111938    |
| node_54: feature_name=cg15720017  | feature_id[168].value ><br>threshold=0.7067741453647614    |
| node_60: feature_name=cg23690444  | feature_id[120].value <=<br>threshold=0.16037724912166595  |
| node_61: feature_name=cg00567872  | feature_id[236].value ><br>threshold=0.7005765736103058    |
| node_85: feature_name=cg01014262  | feature_id[764].value <=<br>threshold=0.5737917125225067   |
| node_86: feature_name=cg22946562  | feature_id[1148].value ><br>threshold=0.6328203976154327   |
| node_134: feature_name=cg14514032 | feature_id[202].value <=<br>threshold=0.4389604330062866   |
| node_135: feature_name=cg13488220 | feature_id[241].value ><br>threshold=0.7352153658866882    |
| node_143: feature_name=cg03840920 | feature_id[256].value ><br>threshold=0.502630889415741     |
| node_147: feature_name=cg13634090 | feature_id[822].value ><br>threshold=0.7207068204879761    |
| node_151: feature_name=cg19584674 | feature_id[2364].value <=<br>threshold=0.41758519411087036 |
| node_152: feature_name=cg07344990 | feature_id[411].value ><br>threshold=0.5484964847564697    |
| node_158: feature_name=cg10298992 | feature_id[3066].value ><br>threshold=0.5707973837852478   |
| node_174: feature_name=cg11843516 | feature_id[20].value <=<br>threshold=0.5590928494930267    |
| node_175: feature_name=cg05185926 | feature_id[448].value ><br>threshold=0.17318664491176605   |
| node_177: feature_name=cg17009731 | feature_id[1220].value ><br>threshold=0.6666513085365295   |
| node_179: feature_name=cg01380319 | feature_id[515].value <=<br>threshold=0.39251960813999176  |
| node_180: feature_name=cg20700977 | feature_id[303].value ><br>threshold=0.8422040641307831    |
| node_184: feature_name=cg24259291 | feature_id[164].value ><br>threshold=0.4872268736362457    |
| node_188: feature_name=cg08097657 | feature_id[67].value ><br>threshold=0.3371318429708481     |

|                                               |                                                           |
|-----------------------------------------------|-----------------------------------------------------------|
| node_190: feature_name=cg07891483             | feature_id[59].value ><br>threshold=0.6211732923984528    |
| node_194: feature_name=cg20122645             | feature_id[275].value ><br>threshold=0.6094755828380585   |
| node_196: feature_name=cg04026354             | feature_id[1763].value <=<br>threshold=0.4341808259487152 |
| node_197: feature_name=cg10149889             | feature_id[1017].value ><br>threshold=0.6150195300579071  |
| node_201: feature_name=cg14890730             | feature_id[337].value <=<br>threshold=0.4372602105140686  |
| node_202: feature_name=cg08331427             | feature_id[132].value ><br>threshold=0.5443233847618103   |
| node_208: feature_name=cg22730007             | feature_id[2544].value ><br>threshold=0.28619489073753357 |
| node_210: feature_name=cg17193551             | feature_id[2057].value ><br>threshold=0.4393353909254074  |
| node_212: feature_name=cg14671764             | feature_id[584].value <=<br>threshold=0.9353199899196625  |
| node_213: feature_name=cg20140662             | feature_id[2044].value ><br>threshold=0.38030287623405457 |
| node_215: feature_name=cg07891483             | feature_id[59].value ><br>threshold=0.829958975315094     |
| node_219: feature_name=cg04884579             | feature_id[1861].value ><br>threshold=0.6106154918670654  |
| node_229: feature_name=cg19548524             | feature_id[2985].value ><br>threshold=0.8623353838920593  |
| node_233: feature_name=cg14788686             | feature_id[3556].value ><br>threshold=0.35090239346027374 |
| node_235: feature_name=cg05380734             | feature_id[2470].value ><br>threshold=0.7112160623073578  |
| Class: clear cell sarcoma of soft parts (CCS) |                                                           |
|                                               |                                                           |
| Rules_62                                      | passed counts:5                                           |
| node_0: feature_name=cg11915444               | feature_id[1171].value ><br>threshold=0.3402601182460785  |
| node_10: feature_name=cg12109728              | feature_id[2810].value ><br>threshold=0.7068270146846771  |
| node_20: feature_name=cg16412000              | feature_id[789].value ><br>threshold=0.6741803884506226   |
| node_24: feature_name=cg17115147              | feature_id[1434].value <=<br>threshold=0.2961975038051605 |
| node_25: feature_name=cg24474622              | feature_id[2737].value ><br>threshold=0.7211934924125671  |



|                                                                         |                                                            |
|-------------------------------------------------------------------------|------------------------------------------------------------|
| node_29: feature_name=cg10472711                                        | feature_id[612].value ><br>threshold=0.45985929667949677   |
| node_37: feature_name=cg01937669                                        | feature_id[188].value <=<br>threshold=0.4809463769197464   |
| node_38: feature_name=cg02157052                                        | feature_id[451].value <=<br>threshold=0.2869153320789337   |
| node_39: feature_name=cg18751958                                        | feature_id[1427].value ><br>threshold=0.4813787043094635   |
| node_41: feature_name=cg22512847                                        | feature_id[1152].value ><br>threshold=0.5129324495792389   |
| node_43: feature_name=cg23345038                                        | feature_id[1147].value ><br>threshold=0.6318148374557495   |
| node_45: feature_name=cg17439009                                        | feature_id[1815].value <=<br>threshold=0.48514117300510406 |
| node_46: feature_name=cg17537493                                        | feature_id[2772].value ><br>threshold=0.5825372636318207   |
| node_52: feature_name=cg01683570                                        | feature_id[110].value ><br>threshold=0.6040188074111938    |
| node_54: feature_name=cg15720017                                        | feature_id[168].value ><br>threshold=0.7067741453647614    |
| node_60: feature_name=cg23690444                                        | feature_id[120].value <=<br>threshold=0.16037724912166595  |
| node_61: feature_name=cg00567872                                        | feature_id[236].value ><br>threshold=0.7005765736103058    |
| node_85: feature_name=cg01014262                                        | feature_id[764].value <=<br>threshold=0.5737917125225067   |
| node_86: feature_name=cg22946562                                        | feature_id[1148].value <=<br>threshold=0.6328203976154327  |
| node_87: feature_name=cg18120975                                        | feature_id[2767].value ><br>threshold=0.7081544995307922   |
| node_91: feature_name=cg17171539                                        | feature_id[25].value ><br>threshold=0.501024603843689      |
| node_111: feature_name=cg21241424                                       | feature_id[1155].value <=<br>threshold=0.7665272355079651  |
| node_112: feature_name=cg21897315                                       | feature_id[3800].value ><br>threshold=0.48165470361709595  |
| node_114: feature_name=cg04375492                                       | feature_id[2874].value ><br>threshold=0.7812598049640656   |
| node_116: feature_name=cg09892984                                       | feature_id[3615].value ><br>threshold=0.6039115190505981   |
| node_118: feature_name=cg05076082                                       | feature_id[215].value <=<br>threshold=0.7612724006175995   |
| Class: atypical fibroxanthoma<br>(AFX)/pleomorphic dermal sarcoma (PDS) |                                                            |

|                                  |                                                            |
|----------------------------------|------------------------------------------------------------|
|                                  |                                                            |
| Rules_63                         | passed counts:5                                            |
| node_0: feature_name=cg11915444  | feature_id[1171].value ><br>threshold=0.3402601182460785   |
| node_10: feature_name=cg12109728 | feature_id[2810].value ><br>threshold=0.7068270146846771   |
| node_20: feature_name=cg16412000 | feature_id[789].value ><br>threshold=0.6741803884506226    |
| node_24: feature_name=cg17115147 | feature_id[1434].value <=<br>threshold=0.2961975038051605  |
| node_25: feature_name=cg24474622 | feature_id[2737].value ><br>threshold=0.7211934924125671   |
| node_29: feature_name=cg10472711 | feature_id[612].value ><br>threshold=0.45985929667949677   |
| node_37: feature_name=cg01937669 | feature_id[188].value <=<br>threshold=0.4809463769197464   |
| node_38: feature_name=cg02157052 | feature_id[451].value <=<br>threshold=0.2869153320789337   |
| node_39: feature_name=cg18751958 | feature_id[1427].value ><br>threshold=0.4813787043094635   |
| node_41: feature_name=cg22512847 | feature_id[1152].value ><br>threshold=0.5129324495792389   |
| node_43: feature_name=cg23345038 | feature_id[1147].value ><br>threshold=0.6318148374557495   |
| node_45: feature_name=cg17439009 | feature_id[1815].value <=<br>threshold=0.48514117300510406 |
| node_46: feature_name=cg17537493 | feature_id[2772].value ><br>threshold=0.5825372636318207   |
| node_52: feature_name=cg01683570 | feature_id[110].value ><br>threshold=0.6040188074111938    |
| node_54: feature_name=cg15720017 | feature_id[168].value ><br>threshold=0.7067741453647614    |
| node_60: feature_name=cg23690444 | feature_id[120].value <=<br>threshold=0.16037724912166595  |
| node_61: feature_name=cg00567872 | feature_id[236].value ><br>threshold=0.7005765736103058    |
| node_85: feature_name=cg01014262 | feature_id[764].value <=<br>threshold=0.5737917125225067   |
| node_86: feature_name=cg22946562 | feature_id[1148].value <=<br>threshold=0.6328203976154327  |
| node_87: feature_name=cg18120975 | feature_id[2767].value ><br>threshold=0.7081544995307922   |

|                                               |                                                           |
|-----------------------------------------------|-----------------------------------------------------------|
| node_91: feature_name=cg17171539              | feature_id[25].value ><br>threshold=0.501024603843689     |
| node_111: feature_name=cg21241424             | feature_id[1155].value <=<br>threshold=0.7665272355079651 |
| node_112: feature_name=cg21897315             | feature_id[3800].value ><br>threshold=0.48165470361709595 |
| node_114: feature_name=cg04375492             | feature_id[2874].value ><br>threshold=0.7812598049640656  |
| node_116: feature_name=cg09892984             | feature_id[3615].value <=<br>threshold=0.6039115190505981 |
| Class: clear cell sarcoma of soft parts (CCS) |                                                           |
| Rules_64                                      | passed counts:4                                           |
| node_0: feature_name=cg11915444               | feature_id[1171].value ><br>threshold=0.3402601182460785  |
| node_10: feature_name=cg12109728              | feature_id[2810].value ><br>threshold=0.7068270146846771  |
| node_20: feature_name=cg16412000              | feature_id[789].value ><br>threshold=0.6741803884506226   |
| node_24: feature_name=cg17115147              | feature_id[1434].value <=<br>threshold=0.2961975038051605 |
| node_25: feature_name=cg24474622              | feature_id[2737].value ><br>threshold=0.7211934924125671  |
| node_29: feature_name=cg10472711              | feature_id[612].value ><br>threshold=0.45985929667949677  |
| node_37: feature_name=cg01937669              | feature_id[188].value <=<br>threshold=0.4809463769197464  |
| node_38: feature_name=cg02157052              | feature_id[451].value ><br>threshold=0.2869153320789337   |
| node_344: feature_name=cg21189849             | feature_id[189].value ><br>threshold=0.7746135592460632   |
| node_348: feature_name=cg06937205             | feature_id[751].value ><br>threshold=0.4331420361995697   |
| node_350: feature_name=cg20165037             | feature_id[2558].value ><br>threshold=0.8168091177940369  |
| node_352: feature_name=cg17454920             | feature_id[3003].value <=<br>threshold=0.5224908739328384 |
| Class: malignant rhabdoid tumour (MRT)        |                                                           |
| Rules_65                                      | passed counts:4                                           |
| node_0: feature_name=cg11915444               | feature_id[1171].value ><br>threshold=0.3402601182460785  |

|                                   |                                                           |
|-----------------------------------|-----------------------------------------------------------|
| node_10: feature_name=cg12109728  | feature_id[2810].value ><br>threshold=0.7068270146846771  |
| node_20: feature_name=cg16412000  | feature_id[789].value ><br>threshold=0.6741803884506226   |
| node_24: feature_name=cg17115147  | feature_id[1434].value <=<br>threshold=0.2961975038051605 |
| node_25: feature_name=cg24474622  | feature_id[2737].value ><br>threshold=0.7211934924125671  |
| node_29: feature_name=cg10472711  | feature_id[612].value ><br>threshold=0.45985929667949677  |
| node_37: feature_name=cg01937669  | feature_id[188].value <=<br>threshold=0.4809463769197464  |
| node_38: feature_name=cg02157052  | feature_id[451].value ><br>threshold=0.2869153320789337   |
| node_344: feature_name=cg21189849 | feature_id[189].value ><br>threshold=0.7746135592460632   |
| node_348: feature_name=cg06937205 | feature_id[751].value ><br>threshold=0.4331420361995697   |
| node_350: feature_name=cg20165037 | feature_id[2558].value <=<br>threshold=0.8168091177940369 |
| Class: muscle tissue (MUS)        |                                                           |
|                                   |                                                           |
| Rules_66                          | passed counts:4                                           |
| node_0: feature_name=cg11915444   | feature_id[1171].value ><br>threshold=0.3402601182460785  |
| node_10: feature_name=cg12109728  | feature_id[2810].value ><br>threshold=0.7068270146846771  |
| node_20: feature_name=cg16412000  | feature_id[789].value ><br>threshold=0.6741803884506226   |
| node_24: feature_name=cg17115147  | feature_id[1434].value <=<br>threshold=0.2961975038051605 |
| node_25: feature_name=cg24474622  | feature_id[2737].value ><br>threshold=0.7211934924125671  |
| node_29: feature_name=cg10472711  | feature_id[612].value ><br>threshold=0.45985929667949677  |
| node_37: feature_name=cg01937669  | feature_id[188].value <=<br>threshold=0.4809463769197464  |
| node_38: feature_name=cg02157052  | feature_id[451].value <=<br>threshold=0.2869153320789337  |
| node_39: feature_name=cg18751958  | feature_id[1427].value ><br>threshold=0.4813787043094635  |
| node_41: feature_name=cg22512847  | feature_id[1152].value ><br>threshold=0.5129324495792389  |

|                                   |                                                            |
|-----------------------------------|------------------------------------------------------------|
| node_43: feature_name=cg23345038  | feature_id[1147].value ><br>threshold=0.6318148374557495   |
| node_45: feature_name=cg17439009  | feature_id[1815].value <=<br>threshold=0.48514117300510406 |
| node_46: feature_name=cg17537493  | feature_id[2772].value ><br>threshold=0.5825372636318207   |
| node_52: feature_name=cg01683570  | feature_id[110].value ><br>threshold=0.6040188074111938    |
| node_54: feature_name=cg15720017  | feature_id[168].value ><br>threshold=0.7067741453647614    |
| node_60: feature_name=cg23690444  | feature_id[120].value <=<br>threshold=0.16037724912166595  |
| node_61: feature_name=cg00567872  | feature_id[236].value ><br>threshold=0.7005765736103058    |
| node_85: feature_name=cg01014262  | feature_id[764].value <=<br>threshold=0.5737917125225067   |
| node_86: feature_name=cg22946562  | feature_id[1148].value ><br>threshold=0.6328203976154327   |
| node_134: feature_name=cg14514032 | feature_id[202].value <=<br>threshold=0.4389604330062866   |
| node_135: feature_name=cg13488220 | feature_id[241].value ><br>threshold=0.7352153658866882    |
| node_143: feature_name=cg03840920 | feature_id[256].value ><br>threshold=0.502630889415741     |
| node_147: feature_name=cg13634090 | feature_id[822].value ><br>threshold=0.7207068204879761    |
| node_151: feature_name=cg19584674 | feature_id[2364].value <=<br>threshold=0.41758519411087036 |
| node_152: feature_name=cg07344990 | feature_id[411].value ><br>threshold=0.5484964847564697    |
| node_158: feature_name=cg10298992 | feature_id[3066].value ><br>threshold=0.5707973837852478   |
| node_174: feature_name=cg11843516 | feature_id[20].value <=<br>threshold=0.5590928494930267    |
| node_175: feature_name=cg05185926 | feature_id[448].value ><br>threshold=0.17318664491176605   |
| node_177: feature_name=cg17009731 | feature_id[1220].value ><br>threshold=0.6666513085365295   |
| node_179: feature_name=cg01380319 | feature_id[515].value <=<br>threshold=0.39251960813999176  |
| node_180: feature_name=cg20700977 | feature_id[303].value ><br>threshold=0.8422040641307831    |
| node_184: feature_name=cg24259291 | feature_id[164].value ><br>threshold=0.4872268736362457    |

|                                                                                   |                                                           |
|-----------------------------------------------------------------------------------|-----------------------------------------------------------|
| node_188: feature_name=cg08097657                                                 | feature_id[67].value ><br>threshold=0.3371318429708481    |
| node_190: feature_name=cg07891483                                                 | feature_id[59].value ><br>threshold=0.6211732923984528    |
| node_194: feature_name=cg20122645                                                 | feature_id[275].value ><br>threshold=0.6094755828380585   |
| node_196: feature_name=cg04026354                                                 | feature_id[1763].value <=<br>threshold=0.4341808259487152 |
| node_197: feature_name=cg10149889                                                 | feature_id[1017].value ><br>threshold=0.6150195300579071  |
| node_201: feature_name=cg14890730                                                 | feature_id[337].value <=<br>threshold=0.4372602105140686  |
| node_202: feature_name=cg08331427                                                 | feature_id[132].value ><br>threshold=0.5443233847618103   |
| node_208: feature_name=cg22730007                                                 | feature_id[2544].value ><br>threshold=0.28619489073753357 |
| node_210: feature_name=cg17193551                                                 | feature_id[2057].value ><br>threshold=0.4393353909254074  |
| node_212: feature_name=cg14671764                                                 | feature_id[584].value <=<br>threshold=0.9353199899196625  |
| node_213: feature_name=cg20140662                                                 | feature_id[2044].value ><br>threshold=0.38030287623405457 |
| node_215: feature_name=cg07891483                                                 | feature_id[59].value ><br>threshold=0.829958975315094     |
| node_219: feature_name=cg04884579                                                 | feature_id[1861].value ><br>threshold=0.6106154918670654  |
| node_229: feature_name=cg19548524                                                 | feature_id[2985].value ><br>threshold=0.8623353838920593  |
| node_233: feature_name=cg14788686                                                 | feature_id[3556].value ><br>threshold=0.35090239346027374 |
| node_235: feature_name=cg05380734                                                 | feature_id[2470].value <=<br>threshold=0.7112160623073578 |
| node_236: feature_name=cg01166827                                                 | feature_id[3708].value ><br>threshold=0.6359498500823975  |
| node_238: feature_name=cg13251842                                                 | feature_id[714].value ><br>threshold=0.8916542232036591   |
| node_240: feature_name=cg02829279                                                 | feature_id[623].value ><br>threshold=0.450528159737587    |
| node_242: feature_name=cg24358599                                                 | feature_id[86].value <=<br>threshold=0.8132582604885101   |
| node_243: feature_name=cg01824933                                                 | feature_id[300].value ><br>threshold=0.5986265540122986   |
| Class: well differentiated liposarcoma (WDLS)/dedifferentiated liposarcoma (DDLs) |                                                           |

|                                   |                                                            |
|-----------------------------------|------------------------------------------------------------|
|                                   |                                                            |
| Rules_67                          | passed counts:4                                            |
| node_0: feature_name=cg11915444   | feature_id[1171].value ><br>threshold=0.3402601182460785   |
| node_10: feature_name=cg12109728  | feature_id[2810].value ><br>threshold=0.7068270146846771   |
| node_20: feature_name=cg16412000  | feature_id[789].value ><br>threshold=0.6741803884506226    |
| node_24: feature_name=cg17115147  | feature_id[1434].value <=<br>threshold=0.2961975038051605  |
| node_25: feature_name=cg24474622  | feature_id[2737].value ><br>threshold=0.7211934924125671   |
| node_29: feature_name=cg10472711  | feature_id[612].value ><br>threshold=0.45985929667949677   |
| node_37: feature_name=cg01937669  | feature_id[188].value <=<br>threshold=0.4809463769197464   |
| node_38: feature_name=cg02157052  | feature_id[451].value <=<br>threshold=0.2869153320789337   |
| node_39: feature_name=cg18751958  | feature_id[1427].value ><br>threshold=0.4813787043094635   |
| node_41: feature_name=cg22512847  | feature_id[1152].value ><br>threshold=0.5129324495792389   |
| node_43: feature_name=cg23345038  | feature_id[1147].value ><br>threshold=0.6318148374557495   |
| node_45: feature_name=cg17439009  | feature_id[1815].value <=<br>threshold=0.48514117300510406 |
| node_46: feature_name=cg17537493  | feature_id[2772].value ><br>threshold=0.5825372636318207   |
| node_52: feature_name=cg01683570  | feature_id[110].value ><br>threshold=0.6040188074111938    |
| node_54: feature_name=cg15720017  | feature_id[168].value ><br>threshold=0.7067741453647614    |
| node_60: feature_name=cg23690444  | feature_id[120].value <=<br>threshold=0.16037724912166595  |
| node_61: feature_name=cg00567872  | feature_id[236].value ><br>threshold=0.7005765736103058    |
| node_85: feature_name=cg01014262  | feature_id[764].value <=<br>threshold=0.5737917125225067   |
| node_86: feature_name=cg22946562  | feature_id[1148].value ><br>threshold=0.6328203976154327   |
| node_134: feature_name=cg14514032 | feature_id[202].value <=<br>threshold=0.4389604330062866   |

|                                   |                                                            |
|-----------------------------------|------------------------------------------------------------|
| node_135: feature_name=cg13488220 | feature_id[241].value ><br>threshold=0.7352153658866882    |
| node_143: feature_name=cg03840920 | feature_id[256].value ><br>threshold=0.502630889415741     |
| node_147: feature_name=cg13634090 | feature_id[822].value ><br>threshold=0.7207068204879761    |
| node_151: feature_name=cg19584674 | feature_id[2364].value <=<br>threshold=0.41758519411087036 |
| node_152: feature_name=cg07344990 | feature_id[411].value ><br>threshold=0.5484964847564697    |
| node_158: feature_name=cg10298992 | feature_id[3066].value ><br>threshold=0.5707973837852478   |
| node_174: feature_name=cg11843516 | feature_id[20].value <=<br>threshold=0.5590928494930267    |
| node_175: feature_name=cg05185926 | feature_id[448].value ><br>threshold=0.17318664491176605   |
| node_177: feature_name=cg17009731 | feature_id[1220].value ><br>threshold=0.6666513085365295   |
| node_179: feature_name=cg01380319 | feature_id[515].value <=<br>threshold=0.39251960813999176  |
| node_180: feature_name=cg20700977 | feature_id[303].value ><br>threshold=0.8422040641307831    |
| node_184: feature_name=cg24259291 | feature_id[164].value ><br>threshold=0.4872268736362457    |
| node_188: feature_name=cg08097657 | feature_id[67].value ><br>threshold=0.3371318429708481     |
| node_190: feature_name=cg07891483 | feature_id[59].value ><br>threshold=0.6211732923984528     |
| node_194: feature_name=cg20122645 | feature_id[275].value ><br>threshold=0.6094755828380585    |
| node_196: feature_name=cg04026354 | feature_id[1763].value <=<br>threshold=0.4341808259487152  |
| node_197: feature_name=cg10149889 | feature_id[1017].value ><br>threshold=0.6150195300579071   |
| node_201: feature_name=cg14890730 | feature_id[337].value <=<br>threshold=0.4372602105140686   |
| node_202: feature_name=cg08331427 | feature_id[132].value ><br>threshold=0.5443233847618103    |
| node_208: feature_name=cg22730007 | feature_id[2544].value ><br>threshold=0.28619489073753357  |
| node_210: feature_name=cg17193551 | feature_id[2057].value ><br>threshold=0.4393353909254074   |
| node_212: feature_name=cg14671764 | feature_id[584].value <=<br>threshold=0.9353199899196625   |



|                                   |                                                            |
|-----------------------------------|------------------------------------------------------------|
| node_213: feature_name=cg20140662 | feature_id[2044].value ><br>threshold=0.38030287623405457  |
| node_215: feature_name=cg07891483 | feature_id[59].value ><br>threshold=0.829958975315094      |
| node_219: feature_name=cg04884579 | feature_id[1861].value ><br>threshold=0.6106154918670654   |
| node_229: feature_name=cg19548524 | feature_id[2985].value ><br>threshold=0.8623353838920593   |
| node_233: feature_name=cg14788686 | feature_id[3556].value ><br>threshold=0.35090239346027374  |
| node_235: feature_name=cg05380734 | feature_id[2470].value <=<br>threshold=0.7112160623073578  |
| node_236: feature_name=cg01166827 | feature_id[3708].value ><br>threshold=0.6359498500823975   |
| node_238: feature_name=cg13251842 | feature_id[714].value <=<br>threshold=0.8916542232036591   |
| Class: chondrosarcoma (CSA)       |                                                            |
| Rules_68                          | passed counts:4                                            |
| node_0: feature_name=cg11915444   | feature_id[1171].value ><br>threshold=0.3402601182460785   |
| node_10: feature_name=cg12109728  | feature_id[2810].value ><br>threshold=0.7068270146846771   |
| node_20: feature_name=cg16412000  | feature_id[789].value ><br>threshold=0.6741803884506226    |
| node_24: feature_name=cg17115147  | feature_id[1434].value <=<br>threshold=0.2961975038051605  |
| node_25: feature_name=cg24474622  | feature_id[2737].value ><br>threshold=0.7211934924125671   |
| node_29: feature_name=cg10472711  | feature_id[612].value ><br>threshold=0.45985929667949677   |
| node_37: feature_name=cg01937669  | feature_id[188].value <=<br>threshold=0.4809463769197464   |
| node_38: feature_name=cg02157052  | feature_id[451].value <=<br>threshold=0.2869153320789337   |
| node_39: feature_name=cg18751958  | feature_id[1427].value ><br>threshold=0.4813787043094635   |
| node_41: feature_name=cg22512847  | feature_id[1152].value ><br>threshold=0.5129324495792389   |
| node_43: feature_name=cg23345038  | feature_id[1147].value ><br>threshold=0.6318148374557495   |
| node_45: feature_name=cg17439009  | feature_id[1815].value <=<br>threshold=0.48514117300510406 |

|                                   |                                                            |
|-----------------------------------|------------------------------------------------------------|
| node_46: feature_name=cg17537493  | feature_id[2772].value ><br>threshold=0.5825372636318207   |
| node_52: feature_name=cg01683570  | feature_id[110].value ><br>threshold=0.6040188074111938    |
| node_54: feature_name=cg15720017  | feature_id[168].value ><br>threshold=0.7067741453647614    |
| node_60: feature_name=cg23690444  | feature_id[120].value <=<br>threshold=0.16037724912166595  |
| node_61: feature_name=cg00567872  | feature_id[236].value ><br>threshold=0.7005765736103058    |
| node_85: feature_name=cg01014262  | feature_id[764].value <=<br>threshold=0.5737917125225067   |
| node_86: feature_name=cg22946562  | feature_id[1148].value ><br>threshold=0.6328203976154327   |
| node_134: feature_name=cg14514032 | feature_id[202].value <=<br>threshold=0.4389604330062866   |
| node_135: feature_name=cg13488220 | feature_id[241].value ><br>threshold=0.7352153658866882    |
| node_143: feature_name=cg03840920 | feature_id[256].value ><br>threshold=0.502630889415741     |
| node_147: feature_name=cg13634090 | feature_id[822].value ><br>threshold=0.7207068204879761    |
| node_151: feature_name=cg19584674 | feature_id[2364].value <=<br>threshold=0.41758519411087036 |
| node_152: feature_name=cg07344990 | feature_id[411].value ><br>threshold=0.5484964847564697    |
| node_158: feature_name=cg10298992 | feature_id[3066].value ><br>threshold=0.5707973837852478   |
| node_174: feature_name=cg11843516 | feature_id[20].value <=<br>threshold=0.5590928494930267    |
| node_175: feature_name=cg05185926 | feature_id[448].value ><br>threshold=0.17318664491176605   |
| node_177: feature_name=cg17009731 | feature_id[1220].value ><br>threshold=0.6666513085365295   |
| node_179: feature_name=cg01380319 | feature_id[515].value <=<br>threshold=0.39251960813999176  |
| node_180: feature_name=cg20700977 | feature_id[303].value ><br>threshold=0.8422040641307831    |
| node_184: feature_name=cg24259291 | feature_id[164].value ><br>threshold=0.4872268736362457    |
| node_188: feature_name=cg08097657 | feature_id[67].value ><br>threshold=0.3371318429708481     |
| node_190: feature_name=cg07891483 | feature_id[59].value ><br>threshold=0.6211732923984528     |

|                                   |                                                           |
|-----------------------------------|-----------------------------------------------------------|
| node_194: feature_name=cg20122645 | feature_id[275].value ><br>threshold=0.6094755828380585   |
| node_196: feature_name=cg04026354 | feature_id[1763].value <=<br>threshold=0.4341808259487152 |
| node_197: feature_name=cg10149889 | feature_id[1017].value ><br>threshold=0.6150195300579071  |
| node_201: feature_name=cg14890730 | feature_id[337].value <=<br>threshold=0.4372602105140686  |
| node_202: feature_name=cg08331427 | feature_id[132].value ><br>threshold=0.5443233847618103   |
| node_208: feature_name=cg22730007 | feature_id[2544].value ><br>threshold=0.28619489073753357 |
| node_210: feature_name=cg17193551 | feature_id[2057].value ><br>threshold=0.4393353909254074  |
| node_212: feature_name=cg14671764 | feature_id[584].value <=<br>threshold=0.9353199899196625  |
| node_213: feature_name=cg20140662 | feature_id[2044].value ><br>threshold=0.38030287623405457 |
| node_215: feature_name=cg07891483 | feature_id[59].value ><br>threshold=0.829958975315094     |
| node_219: feature_name=cg04884579 | feature_id[1861].value ><br>threshold=0.6106154918670654  |
| node_229: feature_name=cg19548524 | feature_id[2985].value ><br>threshold=0.8623353838920593  |
| node_233: feature_name=cg14788686 | feature_id[3556].value ><br>threshold=0.35090239346027374 |
| node_235: feature_name=cg05380734 | feature_id[2470].value <=<br>threshold=0.7112160623073578 |
| node_236: feature_name=cg01166827 | feature_id[3708].value <=<br>threshold=0.6359498500823975 |
| Class: chondroblastoma (CB)       |                                                           |
|                                   |                                                           |
| Rules_69                          | passed counts:4                                           |
| node_0: feature_name=cg11915444   | feature_id[1171].value ><br>threshold=0.3402601182460785  |
| node_10: feature_name=cg12109728  | feature_id[2810].value ><br>threshold=0.7068270146846771  |
| node_20: feature_name=cg16412000  | feature_id[789].value ><br>threshold=0.6741803884506226   |
| node_24: feature_name=cg17115147  | feature_id[1434].value <=<br>threshold=0.2961975038051605 |
| node_25: feature_name=cg24474622  | feature_id[2737].value ><br>threshold=0.7211934924125671  |

|                                   |                                                            |
|-----------------------------------|------------------------------------------------------------|
| node_29: feature_name=cg10472711  | feature_id[612].value ><br>threshold=0.45985929667949677   |
| node_37: feature_name=cg01937669  | feature_id[188].value <=<br>threshold=0.4809463769197464   |
| node_38: feature_name=cg02157052  | feature_id[451].value <=<br>threshold=0.2869153320789337   |
| node_39: feature_name=cg18751958  | feature_id[1427].value ><br>threshold=0.4813787043094635   |
| node_41: feature_name=cg22512847  | feature_id[1152].value ><br>threshold=0.5129324495792389   |
| node_43: feature_name=cg23345038  | feature_id[1147].value ><br>threshold=0.6318148374557495   |
| node_45: feature_name=cg17439009  | feature_id[1815].value <=<br>threshold=0.48514117300510406 |
| node_46: feature_name=cg17537493  | feature_id[2772].value ><br>threshold=0.5825372636318207   |
| node_52: feature_name=cg01683570  | feature_id[110].value ><br>threshold=0.6040188074111938    |
| node_54: feature_name=cg15720017  | feature_id[168].value ><br>threshold=0.7067741453647614    |
| node_60: feature_name=cg23690444  | feature_id[120].value <=<br>threshold=0.16037724912166595  |
| node_61: feature_name=cg00567872  | feature_id[236].value ><br>threshold=0.7005765736103058    |
| node_85: feature_name=cg01014262  | feature_id[764].value <=<br>threshold=0.5737917125225067   |
| node_86: feature_name=cg22946562  | feature_id[1148].value <=<br>threshold=0.6328203976154327  |
| node_87: feature_name=cg18120975  | feature_id[2767].value ><br>threshold=0.7081544995307922   |
| node_91: feature_name=cg17171539  | feature_id[25].value ><br>threshold=0.501024603843689      |
| node_111: feature_name=cg21241424 | feature_id[1155].value <=<br>threshold=0.7665272355079651  |
| node_112: feature_name=cg21897315 | feature_id[3800].value ><br>threshold=0.48165470361709595  |
| node_114: feature_name=cg04375492 | feature_id[2874].value ><br>threshold=0.7812598049640656   |
| node_116: feature_name=cg09892984 | feature_id[3615].value ><br>threshold=0.6039115190505981   |
| node_118: feature_name=cg05076082 | feature_id[215].value ><br>threshold=0.7612724006175995    |
| node_120: feature_name=cg15776300 | feature_id[3872].value ><br>threshold=0.922246515750885    |

|                                         |                                                            |
|-----------------------------------------|------------------------------------------------------------|
| Class: undifferentiated sarcoma (USARC) |                                                            |
|                                         |                                                            |
| Rules_70                                | passed counts:4                                            |
| node_0: feature_name=cg11915444         | feature_id[1171].value ><br>threshold=0.3402601182460785   |
| node_10: feature_name=cg12109728        | feature_id[2810].value ><br>threshold=0.7068270146846771   |
| node_20: feature_name=cg16412000        | feature_id[789].value ><br>threshold=0.6741803884506226    |
| node_24: feature_name=cg17115147        | feature_id[1434].value <=<br>threshold=0.2961975038051605  |
| node_25: feature_name=cg24474622        | feature_id[2737].value ><br>threshold=0.7211934924125671   |
| node_29: feature_name=cg10472711        | feature_id[612].value ><br>threshold=0.45985929667949677   |
| node_37: feature_name=cg01937669        | feature_id[188].value <=<br>threshold=0.4809463769197464   |
| node_38: feature_name=cg02157052        | feature_id[451].value <=<br>threshold=0.2869153320789337   |
| node_39: feature_name=cg18751958        | feature_id[1427].value ><br>threshold=0.4813787043094635   |
| node_41: feature_name=cg22512847        | feature_id[1152].value ><br>threshold=0.5129324495792389   |
| node_43: feature_name=cg23345038        | feature_id[1147].value ><br>threshold=0.6318148374557495   |
| node_45: feature_name=cg17439009        | feature_id[1815].value <=<br>threshold=0.48514117300510406 |
| node_46: feature_name=cg17537493        | feature_id[2772].value ><br>threshold=0.5825372636318207   |
| node_52: feature_name=cg01683570        | feature_id[110].value ><br>threshold=0.6040188074111938    |
| node_54: feature_name=cg15720017        | feature_id[168].value ><br>threshold=0.7067741453647614    |
| node_60: feature_name=cg23690444        | feature_id[120].value <=<br>threshold=0.16037724912166595  |
| node_61: feature_name=cg00567872        | feature_id[236].value <=<br>threshold=0.7005765736103058   |
| node_62: feature_name=cg09293488        | feature_id[2629].value ><br>threshold=0.839823454618454    |
| node_68: feature_name=cg04838832        | feature_id[1184].value ><br>threshold=0.41919413208961487  |
| Class: muscle tissue (MUS)              |                                                            |
|                                         |                                                            |

|                                     |                                                            |
|-------------------------------------|------------------------------------------------------------|
| Rules_71                            | passed counts:4                                            |
| node_0: feature_name=cg11915444     | feature_id[1171].value ><br>threshold=0.3402601182460785   |
| node_10: feature_name=cg12109728    | feature_id[2810].value ><br>threshold=0.7068270146846771   |
| node_20: feature_name=cg16412000    | feature_id[789].value ><br>threshold=0.6741803884506226    |
| node_24: feature_name=cg17115147    | feature_id[1434].value <=<br>threshold=0.2961975038051605  |
| node_25: feature_name=cg24474622    | feature_id[2737].value ><br>threshold=0.7211934924125671   |
| node_29: feature_name=cg10472711    | feature_id[612].value ><br>threshold=0.45985929667949677   |
| node_37: feature_name=cg01937669    | feature_id[188].value <=<br>threshold=0.4809463769197464   |
| node_38: feature_name=cg02157052    | feature_id[451].value <=<br>threshold=0.2869153320789337   |
| node_39: feature_name=cg18751958    | feature_id[1427].value ><br>threshold=0.4813787043094635   |
| node_41: feature_name=cg22512847    | feature_id[1152].value ><br>threshold=0.5129324495792389   |
| node_43: feature_name=cg23345038    | feature_id[1147].value ><br>threshold=0.6318148374557495   |
| node_45: feature_name=cg17439009    | feature_id[1815].value <=<br>threshold=0.48514117300510406 |
| node_46: feature_name=cg17537493    | feature_id[2772].value ><br>threshold=0.5825372636318207   |
| node_52: feature_name=cg01683570    | feature_id[110].value ><br>threshold=0.6040188074111938    |
| node_54: feature_name=cg15720017    | feature_id[168].value ><br>threshold=0.7067741453647614    |
| node_60: feature_name=cg23690444    | feature_id[120].value <=<br>threshold=0.16037724912166595  |
| node_61: feature_name=cg00567872    | feature_id[236].value <=<br>threshold=0.7005765736103058   |
| node_62: feature_name=cg09293488    | feature_id[2629].value ><br>threshold=0.839823454618454    |
| node_68: feature_name=cg04838832    | feature_id[1184].value <=<br>threshold=0.41919413208961487 |
| node_69: feature_name=cg18153137    | feature_id[2198].value ><br>threshold=0.08548648655414581  |
| Class: infantile fibrosarcoma (IFS) |                                                            |
|                                     |                                                            |

|                                  |                                                            |
|----------------------------------|------------------------------------------------------------|
| Rules_72                         | passed counts:4                                            |
| node_0: feature_name=cg11915444  | feature_id[1171].value ><br>threshold=0.3402601182460785   |
| node_10: feature_name=cg12109728 | feature_id[2810].value ><br>threshold=0.7068270146846771   |
| node_20: feature_name=cg16412000 | feature_id[789].value ><br>threshold=0.6741803884506226    |
| node_24: feature_name=cg17115147 | feature_id[1434].value <=<br>threshold=0.2961975038051605  |
| node_25: feature_name=cg24474622 | feature_id[2737].value ><br>threshold=0.7211934924125671   |
| node_29: feature_name=cg10472711 | feature_id[612].value ><br>threshold=0.45985929667949677   |
| node_37: feature_name=cg01937669 | feature_id[188].value <=<br>threshold=0.4809463769197464   |
| node_38: feature_name=cg02157052 | feature_id[451].value <=<br>threshold=0.2869153320789337   |
| node_39: feature_name=cg18751958 | feature_id[1427].value ><br>threshold=0.4813787043094635   |
| node_41: feature_name=cg22512847 | feature_id[1152].value ><br>threshold=0.5129324495792389   |
| node_43: feature_name=cg23345038 | feature_id[1147].value ><br>threshold=0.6318148374557495   |
| node_45: feature_name=cg17439009 | feature_id[1815].value <=<br>threshold=0.48514117300510406 |
| node_46: feature_name=cg17537493 | feature_id[2772].value <=<br>threshold=0.5825372636318207  |
| node_47: feature_name=cg16572224 | feature_id[2780].value <=<br>threshold=0.6722612977027893  |
| node_48: feature_name=cg00760872 | feature_id[2909].value <=<br>threshold=0.46596916019916534 |
| Class: Kaposi sarcoma (KS)       |                                                            |
|                                  |                                                            |
| Rules_73                         | passed counts:3                                            |
| node_0: feature_name=cg11915444  | feature_id[1171].value ><br>threshold=0.3402601182460785   |
| node_10: feature_name=cg12109728 | feature_id[2810].value ><br>threshold=0.7068270146846771   |
| node_20: feature_name=cg16412000 | feature_id[789].value ><br>threshold=0.6741803884506226    |
| node_24: feature_name=cg17115147 | feature_id[1434].value ><br>threshold=0.2961975038051605   |

|                                                         |                                                           |
|---------------------------------------------------------|-----------------------------------------------------------|
| node_368: feature_name=cg27543578                       | feature_id[878].value ><br>threshold=0.8884280920028687   |
| node_372: feature_name=cg11400707                       | feature_id[1940].value ><br>threshold=0.6575311124324799  |
| Class: malignant peripheral nerve sheath tumour (MPNST) |                                                           |
|                                                         |                                                           |
| Rules_74                                                | passed counts:3                                           |
| node_0: feature_name=cg11915444                         | feature_id[1171].value ><br>threshold=0.3402601182460785  |
| node_10: feature_name=cg12109728                        | feature_id[2810].value ><br>threshold=0.7068270146846771  |
| node_20: feature_name=cg16412000                        | feature_id[789].value ><br>threshold=0.6741803884506226   |
| node_24: feature_name=cg17115147                        | feature_id[1434].value <=<br>threshold=0.2961975038051605 |
| node_25: feature_name=cg24474622                        | feature_id[2737].value ><br>threshold=0.7211934924125671  |
| node_29: feature_name=cg10472711                        | feature_id[612].value ><br>threshold=0.45985929667949677  |
| node_37: feature_name=cg01937669                        | feature_id[188].value <=<br>threshold=0.4809463769197464  |
| node_38: feature_name=cg02157052                        | feature_id[451].value ><br>threshold=0.2869153320789337   |
| node_344: feature_name=cg21189849                       | feature_id[189].value ><br>threshold=0.7746135592460632   |
| node_348: feature_name=cg06937205                       | feature_id[751].value ><br>threshold=0.4331420361995697   |
| node_350: feature_name=cg20165037                       | feature_id[2558].value ><br>threshold=0.8168091177940369  |
| node_352: feature_name=cg17454920                       | feature_id[3003].value ><br>threshold=0.5224908739328384  |
| node_354: feature_name=cg25878830                       | feature_id[1496].value ><br>threshold=0.4498005360364914  |
| node_356: feature_name=cg26070874                       | feature_id[1040].value ><br>threshold=0.8498157262802124  |
| Class: small blue round cell tumour (SBRCT)             |                                                           |
|                                                         |                                                           |
| Rules_75                                                | passed counts:3                                           |
| node_0: feature_name=cg11915444                         | feature_id[1171].value ><br>threshold=0.3402601182460785  |
| node_10: feature_name=cg12109728                        | feature_id[2810].value ><br>threshold=0.7068270146846771  |



|                                   |                                                           |
|-----------------------------------|-----------------------------------------------------------|
| node_20: feature_name=cg16412000  | feature_id[789].value ><br>threshold=0.6741803884506226   |
| node_24: feature_name=cg17115147  | feature_id[1434].value <=<br>threshold=0.2961975038051605 |
| node_25: feature_name=cg24474622  | feature_id[2737].value ><br>threshold=0.7211934924125671  |
| node_29: feature_name=cg10472711  | feature_id[612].value ><br>threshold=0.45985929667949677  |
| node_37: feature_name=cg01937669  | feature_id[188].value <=<br>threshold=0.4809463769197464  |
| node_38: feature_name=cg02157052  | feature_id[451].value ><br>threshold=0.2869153320789337   |
| node_344: feature_name=cg21189849 | feature_id[189].value ><br>threshold=0.7746135592460632   |
| node_348: feature_name=cg06937205 | feature_id[751].value ><br>threshold=0.4331420361995697   |
| node_350: feature_name=cg20165037 | feature_id[2558].value ><br>threshold=0.8168091177940369  |
| node_352: feature_name=cg17454920 | feature_id[3003].value ><br>threshold=0.5224908739328384  |
| node_354: feature_name=cg25878830 | feature_id[1496].value ><br>threshold=0.4498005360364914  |
| node_356: feature_name=cg26070874 | feature_id[1040].value <=<br>threshold=0.8498157262802124 |
| node_357: feature_name=cg19730379 | feature_id[3228].value <=<br>threshold=0.3024083226919174 |
| Class: epithelioid sarcoma (ES)   |                                                           |
| Rules_76                          | passed counts:3                                           |
| node_0: feature_name=cg11915444   | feature_id[1171].value ><br>threshold=0.3402601182460785  |
| node_10: feature_name=cg12109728  | feature_id[2810].value ><br>threshold=0.7068270146846771  |
| node_20: feature_name=cg16412000  | feature_id[789].value ><br>threshold=0.6741803884506226   |
| node_24: feature_name=cg17115147  | feature_id[1434].value <=<br>threshold=0.2961975038051605 |
| node_25: feature_name=cg24474622  | feature_id[2737].value ><br>threshold=0.7211934924125671  |
| node_29: feature_name=cg10472711  | feature_id[612].value ><br>threshold=0.45985929667949677  |
| node_37: feature_name=cg01937669  | feature_id[188].value <=<br>threshold=0.4809463769197464  |

|                                      |                                                            |
|--------------------------------------|------------------------------------------------------------|
| node_38: feature_name=cg02157052     | feature_id[451].value ><br>threshold=0.2869153320789337    |
| node_344: feature_name=cg21189849    | feature_id[189].value ><br>threshold=0.7746135592460632    |
| node_348: feature_name=cg06937205    | feature_id[751].value ><br>threshold=0.4331420361995697    |
| node_350: feature_name=cg20165037    | feature_id[2558].value ><br>threshold=0.8168091177940369   |
| node_352: feature_name=cg17454920    | feature_id[3003].value ><br>threshold=0.5224908739328384   |
| node_354: feature_name=cg25878830    | feature_id[1496].value <=<br>threshold=0.4498005360364914  |
| Class: solitary fibrous tumour (SFT) |                                                            |
|                                      |                                                            |
| Rules_77                             | passed counts:3                                            |
| node_0: feature_name=cg11915444      | feature_id[1171].value ><br>threshold=0.3402601182460785   |
| node_10: feature_name=cg12109728     | feature_id[2810].value ><br>threshold=0.7068270146846771   |
| node_20: feature_name=cg16412000     | feature_id[789].value ><br>threshold=0.6741803884506226    |
| node_24: feature_name=cg17115147     | feature_id[1434].value <=<br>threshold=0.2961975038051605  |
| node_25: feature_name=cg24474622     | feature_id[2737].value ><br>threshold=0.7211934924125671   |
| node_29: feature_name=cg10472711     | feature_id[612].value ><br>threshold=0.45985929667949677   |
| node_37: feature_name=cg01937669     | feature_id[188].value <=<br>threshold=0.4809463769197464   |
| node_38: feature_name=cg02157052     | feature_id[451].value <=<br>threshold=0.2869153320789337   |
| node_39: feature_name=cg18751958     | feature_id[1427].value ><br>threshold=0.4813787043094635   |
| node_41: feature_name=cg22512847     | feature_id[1152].value ><br>threshold=0.5129324495792389   |
| node_43: feature_name=cg23345038     | feature_id[1147].value ><br>threshold=0.6318148374557495   |
| node_45: feature_name=cg17439009     | feature_id[1815].value <=<br>threshold=0.48514117300510406 |
| node_46: feature_name=cg17537493     | feature_id[2772].value ><br>threshold=0.5825372636318207   |
| node_52: feature_name=cg01683570     | feature_id[110].value ><br>threshold=0.6040188074111938    |

|                                   |                                                            |
|-----------------------------------|------------------------------------------------------------|
| node_54: feature_name=cg15720017  | feature_id[168].value ><br>threshold=0.7067741453647614    |
| node_60: feature_name=cg23690444  | feature_id[120].value <=<br>threshold=0.16037724912166595  |
| node_61: feature_name=cg00567872  | feature_id[236].value ><br>threshold=0.7005765736103058    |
| node_85: feature_name=cg01014262  | feature_id[764].value <=<br>threshold=0.5737917125225067   |
| node_86: feature_name=cg22946562  | feature_id[1148].value ><br>threshold=0.6328203976154327   |
| node_134: feature_name=cg14514032 | feature_id[202].value <=<br>threshold=0.4389604330062866   |
| node_135: feature_name=cg13488220 | feature_id[241].value ><br>threshold=0.7352153658866882    |
| node_143: feature_name=cg03840920 | feature_id[256].value ><br>threshold=0.502630889415741     |
| node_147: feature_name=cg13634090 | feature_id[822].value ><br>threshold=0.7207068204879761    |
| node_151: feature_name=cg19584674 | feature_id[2364].value <=<br>threshold=0.41758519411087036 |
| node_152: feature_name=cg07344990 | feature_id[411].value ><br>threshold=0.5484964847564697    |
| node_158: feature_name=cg10298992 | feature_id[3066].value ><br>threshold=0.5707973837852478   |
| node_174: feature_name=cg11843516 | feature_id[20].value <=<br>threshold=0.5590928494930267    |
| node_175: feature_name=cg05185926 | feature_id[448].value ><br>threshold=0.17318664491176605   |
| node_177: feature_name=cg17009731 | feature_id[1220].value ><br>threshold=0.6666513085365295   |
| node_179: feature_name=cg01380319 | feature_id[515].value <=<br>threshold=0.39251960813999176  |
| node_180: feature_name=cg20700977 | feature_id[303].value ><br>threshold=0.8422040641307831    |
| node_184: feature_name=cg24259291 | feature_id[164].value ><br>threshold=0.4872268736362457    |
| node_188: feature_name=cg08097657 | feature_id[67].value ><br>threshold=0.3371318429708481     |
| node_190: feature_name=cg07891483 | feature_id[59].value ><br>threshold=0.6211732923984528     |
| node_194: feature_name=cg20122645 | feature_id[275].value ><br>threshold=0.6094755828380585    |
| node_196: feature_name=cg04026354 | feature_id[1763].value <=<br>threshold=0.4341808259487152  |

|                                                 |                                                            |
|-------------------------------------------------|------------------------------------------------------------|
| node_197: feature_name=cg10149889               | feature_id[1017].value ><br>threshold=0.6150195300579071   |
| node_201: feature_name=cg14890730               | feature_id[337].value <=<br>threshold=0.4372602105140686   |
| node_202: feature_name=cg08331427               | feature_id[132].value ><br>threshold=0.5443233847618103    |
| node_208: feature_name=cg22730007               | feature_id[2544].value ><br>threshold=0.28619489073753357  |
| node_210: feature_name=cg17193551               | feature_id[2057].value ><br>threshold=0.4393353909254074   |
| node_212: feature_name=cg14671764               | feature_id[584].value ><br>threshold=0.9353199899196625    |
| node_268: feature_name=cg21377260               | feature_id[534].value <=<br>threshold=0.9840706288814545   |
| node_269: feature_name=cg27143326               | feature_id[1403].value ><br>threshold=0.8949433267116547   |
| Class: sclerosing epithelioid fibrosarcoma(SEF) |                                                            |
| Rules_78                                        | passed counts:3                                            |
| node_0: feature_name=cg11915444                 | feature_id[1171].value ><br>threshold=0.3402601182460785   |
| node_10: feature_name=cg12109728                | feature_id[2810].value ><br>threshold=0.7068270146846771   |
| node_20: feature_name=cg16412000                | feature_id[789].value ><br>threshold=0.6741803884506226    |
| node_24: feature_name=cg17115147                | feature_id[1434].value <=<br>threshold=0.2961975038051605  |
| node_25: feature_name=cg24474622                | feature_id[2737].value ><br>threshold=0.7211934924125671   |
| node_29: feature_name=cg10472711                | feature_id[612].value ><br>threshold=0.45985929667949677   |
| node_37: feature_name=cg01937669                | feature_id[188].value <=<br>threshold=0.4809463769197464   |
| node_38: feature_name=cg02157052                | feature_id[451].value <=<br>threshold=0.2869153320789337   |
| node_39: feature_name=cg18751958                | feature_id[1427].value ><br>threshold=0.4813787043094635   |
| node_41: feature_name=cg22512847                | feature_id[1152].value ><br>threshold=0.5129324495792389   |
| node_43: feature_name=cg23345038                | feature_id[1147].value ><br>threshold=0.6318148374557495   |
| node_45: feature_name=cg17439009                | feature_id[1815].value <=<br>threshold=0.48514117300510406 |

|                                   |                                                            |
|-----------------------------------|------------------------------------------------------------|
| node_46: feature_name=cg17537493  | feature_id[2772].value ><br>threshold=0.5825372636318207   |
| node_52: feature_name=cg01683570  | feature_id[110].value ><br>threshold=0.6040188074111938    |
| node_54: feature_name=cg15720017  | feature_id[168].value ><br>threshold=0.7067741453647614    |
| node_60: feature_name=cg23690444  | feature_id[120].value <=<br>threshold=0.16037724912166595  |
| node_61: feature_name=cg00567872  | feature_id[236].value ><br>threshold=0.7005765736103058    |
| node_85: feature_name=cg01014262  | feature_id[764].value <=<br>threshold=0.5737917125225067   |
| node_86: feature_name=cg22946562  | feature_id[1148].value ><br>threshold=0.6328203976154327   |
| node_134: feature_name=cg14514032 | feature_id[202].value <=<br>threshold=0.4389604330062866   |
| node_135: feature_name=cg13488220 | feature_id[241].value ><br>threshold=0.7352153658866882    |
| node_143: feature_name=cg03840920 | feature_id[256].value ><br>threshold=0.502630889415741     |
| node_147: feature_name=cg13634090 | feature_id[822].value ><br>threshold=0.7207068204879761    |
| node_151: feature_name=cg19584674 | feature_id[2364].value <=<br>threshold=0.41758519411087036 |
| node_152: feature_name=cg07344990 | feature_id[411].value ><br>threshold=0.5484964847564697    |
| node_158: feature_name=cg10298992 | feature_id[3066].value ><br>threshold=0.5707973837852478   |
| node_174: feature_name=cg11843516 | feature_id[20].value <=<br>threshold=0.5590928494930267    |
| node_175: feature_name=cg05185926 | feature_id[448].value ><br>threshold=0.17318664491176605   |
| node_177: feature_name=cg17009731 | feature_id[1220].value ><br>threshold=0.6666513085365295   |
| node_179: feature_name=cg01380319 | feature_id[515].value <=<br>threshold=0.39251960813999176  |
| node_180: feature_name=cg20700977 | feature_id[303].value ><br>threshold=0.8422040641307831    |
| node_184: feature_name=cg24259291 | feature_id[164].value ><br>threshold=0.4872268736362457    |
| node_188: feature_name=cg08097657 | feature_id[67].value ><br>threshold=0.3371318429708481     |
| node_190: feature_name=cg07891483 | feature_id[59].value ><br>threshold=0.6211732923984528     |

|                                                                         |                                                           |
|-------------------------------------------------------------------------|-----------------------------------------------------------|
| node_194: feature_name=cg20122645                                       | feature_id[275].value ><br>threshold=0.6094755828380585   |
| node_196: feature_name=cg04026354                                       | feature_id[1763].value <=<br>threshold=0.4341808259487152 |
| node_197: feature_name=cg10149889                                       | feature_id[1017].value ><br>threshold=0.6150195300579071  |
| node_201: feature_name=cg14890730                                       | feature_id[337].value <=<br>threshold=0.4372602105140686  |
| node_202: feature_name=cg08331427                                       | feature_id[132].value ><br>threshold=0.5443233847618103   |
| node_208: feature_name=cg22730007                                       | feature_id[2544].value ><br>threshold=0.28619489073753357 |
| node_210: feature_name=cg17193551                                       | feature_id[2057].value ><br>threshold=0.4393353909254074  |
| node_212: feature_name=cg14671764                                       | feature_id[584].value <=<br>threshold=0.9353199899196625  |
| node_213: feature_name=cg20140662                                       | feature_id[2044].value ><br>threshold=0.38030287623405457 |
| node_215: feature_name=cg07891483                                       | feature_id[59].value ><br>threshold=0.829958975315094     |
| node_219: feature_name=cg04884579                                       | feature_id[1861].value ><br>threshold=0.6106154918670654  |
| node_229: feature_name=cg19548524                                       | feature_id[2985].value ><br>threshold=0.8623353838920593  |
| node_233: feature_name=cg14788686                                       | feature_id[3556].value ><br>threshold=0.35090239346027374 |
| node_235: feature_name=cg05380734                                       | feature_id[2470].value <=<br>threshold=0.7112160623073578 |
| node_236: feature_name=cg01166827                                       | feature_id[3708].value ><br>threshold=0.6359498500823975  |
| node_238: feature_name=cg13251842                                       | feature_id[714].value ><br>threshold=0.8916542232036591   |
| node_240: feature_name=cg02829279                                       | feature_id[623].value ><br>threshold=0.450528159737587    |
| node_242: feature_name=cg24358599                                       | feature_id[86].value ><br>threshold=0.8132582604885101    |
| node_246: feature_name=cg05544807                                       | feature_id[3661].value ><br>threshold=0.6726464331150055  |
| Class: atypical fibroxanthoma<br>(AFX)/pleomorphic dermal sarcoma (PDS) |                                                           |
|                                                                         |                                                           |
| Rules_79                                                                | passed counts:3                                           |

|                                   |                                                            |
|-----------------------------------|------------------------------------------------------------|
| node_0: feature_name=cg11915444   | feature_id[1171].value ><br>threshold=0.3402601182460785   |
| node_10: feature_name=cg12109728  | feature_id[2810].value ><br>threshold=0.7068270146846771   |
| node_20: feature_name=cg16412000  | feature_id[789].value ><br>threshold=0.6741803884506226    |
| node_24: feature_name=cg17115147  | feature_id[1434].value <=<br>threshold=0.2961975038051605  |
| node_25: feature_name=cg24474622  | feature_id[2737].value ><br>threshold=0.7211934924125671   |
| node_29: feature_name=cg10472711  | feature_id[612].value ><br>threshold=0.45985929667949677   |
| node_37: feature_name=cg01937669  | feature_id[188].value <=<br>threshold=0.4809463769197464   |
| node_38: feature_name=cg02157052  | feature_id[451].value <=<br>threshold=0.2869153320789337   |
| node_39: feature_name=cg18751958  | feature_id[1427].value ><br>threshold=0.4813787043094635   |
| node_41: feature_name=cg22512847  | feature_id[1152].value ><br>threshold=0.5129324495792389   |
| node_43: feature_name=cg23345038  | feature_id[1147].value ><br>threshold=0.6318148374557495   |
| node_45: feature_name=cg17439009  | feature_id[1815].value <=<br>threshold=0.48514117300510406 |
| node_46: feature_name=cg17537493  | feature_id[2772].value ><br>threshold=0.5825372636318207   |
| node_52: feature_name=cg01683570  | feature_id[110].value ><br>threshold=0.6040188074111938    |
| node_54: feature_name=cg15720017  | feature_id[168].value ><br>threshold=0.7067741453647614    |
| node_60: feature_name=cg23690444  | feature_id[120].value <=<br>threshold=0.16037724912166595  |
| node_61: feature_name=cg00567872  | feature_id[236].value ><br>threshold=0.7005765736103058    |
| node_85: feature_name=cg01014262  | feature_id[764].value <=<br>threshold=0.5737917125225067   |
| node_86: feature_name=cg22946562  | feature_id[1148].value ><br>threshold=0.6328203976154327   |
| node_134: feature_name=cg14514032 | feature_id[202].value <=<br>threshold=0.4389604330062866   |
| node_135: feature_name=cg13488220 | feature_id[241].value ><br>threshold=0.7352153658866882    |
| node_143: feature_name=cg03840920 | feature_id[256].value ><br>threshold=0.502630889415741     |

|                                   |                                                            |
|-----------------------------------|------------------------------------------------------------|
| node_147: feature_name=cg13634090 | feature_id[822].value ><br>threshold=0.7207068204879761    |
| node_151: feature_name=cg19584674 | feature_id[2364].value <=<br>threshold=0.41758519411087036 |
| node_152: feature_name=cg07344990 | feature_id[411].value ><br>threshold=0.5484964847564697    |
| node_158: feature_name=cg10298992 | feature_id[3066].value ><br>threshold=0.5707973837852478   |
| node_174: feature_name=cg11843516 | feature_id[20].value <=<br>threshold=0.5590928494930267    |
| node_175: feature_name=cg05185926 | feature_id[448].value ><br>threshold=0.17318664491176605   |
| node_177: feature_name=cg17009731 | feature_id[1220].value ><br>threshold=0.6666513085365295   |
| node_179: feature_name=cg01380319 | feature_id[515].value <=<br>threshold=0.39251960813999176  |
| node_180: feature_name=cg20700977 | feature_id[303].value ><br>threshold=0.8422040641307831    |
| node_184: feature_name=cg24259291 | feature_id[164].value ><br>threshold=0.4872268736362457    |
| node_188: feature_name=cg08097657 | feature_id[67].value ><br>threshold=0.3371318429708481     |
| node_190: feature_name=cg07891483 | feature_id[59].value ><br>threshold=0.6211732923984528     |
| node_194: feature_name=cg20122645 | feature_id[275].value ><br>threshold=0.6094755828380585    |
| node_196: feature_name=cg04026354 | feature_id[1763].value <=<br>threshold=0.4341808259487152  |
| node_197: feature_name=cg10149889 | feature_id[1017].value ><br>threshold=0.6150195300579071   |
| node_201: feature_name=cg14890730 | feature_id[337].value <=<br>threshold=0.4372602105140686   |
| node_202: feature_name=cg08331427 | feature_id[132].value ><br>threshold=0.5443233847618103    |
| node_208: feature_name=cg22730007 | feature_id[2544].value ><br>threshold=0.28619489073753357  |
| node_210: feature_name=cg17193551 | feature_id[2057].value ><br>threshold=0.4393353909254074   |
| node_212: feature_name=cg14671764 | feature_id[584].value <=<br>threshold=0.9353199899196625   |
| node_213: feature_name=cg20140662 | feature_id[2044].value ><br>threshold=0.38030287623405457  |
| node_215: feature_name=cg07891483 | feature_id[59].value ><br>threshold=0.829958975315094      |



|                                   |                                                            |
|-----------------------------------|------------------------------------------------------------|
| node_219: feature_name=cg04884579 | feature_id[1861].value ><br>threshold=0.6106154918670654   |
| node_229: feature_name=cg19548524 | feature_id[2985].value ><br>threshold=0.8623353838920593   |
| node_233: feature_name=cg14788686 | feature_id[3556].value ><br>threshold=0.35090239346027374  |
| node_235: feature_name=cg05380734 | feature_id[2470].value <=<br>threshold=0.7112160623073578  |
| node_236: feature_name=cg01166827 | feature_id[3708].value ><br>threshold=0.6359498500823975   |
| node_238: feature_name=cg13251842 | feature_id[714].value ><br>threshold=0.8916542232036591    |
| node_240: feature_name=cg02829279 | feature_id[623].value <=<br>threshold=0.450528159737587    |
| Class: Ewing sarcoma (EWING)      |                                                            |
|                                   |                                                            |
| Rules_80                          | passed counts:3                                            |
| node_0: feature_name=cg11915444   | feature_id[1171].value ><br>threshold=0.3402601182460785   |
| node_10: feature_name=cg12109728  | feature_id[2810].value ><br>threshold=0.7068270146846771   |
| node_20: feature_name=cg16412000  | feature_id[789].value ><br>threshold=0.6741803884506226    |
| node_24: feature_name=cg17115147  | feature_id[1434].value <=<br>threshold=0.2961975038051605  |
| node_25: feature_name=cg24474622  | feature_id[2737].value ><br>threshold=0.7211934924125671   |
| node_29: feature_name=cg10472711  | feature_id[612].value ><br>threshold=0.45985929667949677   |
| node_37: feature_name=cg01937669  | feature_id[188].value <=<br>threshold=0.4809463769197464   |
| node_38: feature_name=cg02157052  | feature_id[451].value <=<br>threshold=0.2869153320789337   |
| node_39: feature_name=cg18751958  | feature_id[1427].value ><br>threshold=0.4813787043094635   |
| node_41: feature_name=cg22512847  | feature_id[1152].value ><br>threshold=0.5129324495792389   |
| node_43: feature_name=cg23345038  | feature_id[1147].value ><br>threshold=0.6318148374557495   |
| node_45: feature_name=cg17439009  | feature_id[1815].value <=<br>threshold=0.48514117300510406 |
| node_46: feature_name=cg17537493  | feature_id[2772].value ><br>threshold=0.5825372636318207   |

|                                               |                                                            |
|-----------------------------------------------|------------------------------------------------------------|
| node_52: feature_name=cg01683570              | feature_id[110].value ><br>threshold=0.6040188074111938    |
| node_54: feature_name=cg15720017              | feature_id[168].value ><br>threshold=0.7067741453647614    |
| node_60: feature_name=cg23690444              | feature_id[120].value <=<br>threshold=0.16037724912166595  |
| node_61: feature_name=cg00567872              | feature_id[236].value ><br>threshold=0.7005765736103058    |
| node_85: feature_name=cg01014262              | feature_id[764].value <=<br>threshold=0.5737917125225067   |
| node_86: feature_name=cg22946562              | feature_id[1148].value ><br>threshold=0.6328203976154327   |
| node_134: feature_name=cg14514032             | feature_id[202].value <=<br>threshold=0.4389604330062866   |
| node_135: feature_name=cg13488220             | feature_id[241].value ><br>threshold=0.7352153658866882    |
| node_143: feature_name=cg03840920             | feature_id[256].value ><br>threshold=0.502630889415741     |
| node_147: feature_name=cg13634090             | feature_id[822].value ><br>threshold=0.7207068204879761    |
| node_151: feature_name=cg19584674             | feature_id[2364].value <=<br>threshold=0.41758519411087036 |
| node_152: feature_name=cg07344990             | feature_id[411].value ><br>threshold=0.5484964847564697    |
| node_158: feature_name=cg10298992             | feature_id[3066].value <=<br>threshold=0.5707973837852478  |
| node_159: feature_name=cg24852135             | feature_id[47].value <=<br>threshold=0.8445721566677094    |
| node_160: feature_name=cg25606046             | feature_id[2007].value ><br>threshold=0.8722946643829346   |
| Class: embryonal rhabdomyosarcoma (RMS (EMB)) |                                                            |
|                                               |                                                            |
| Rules_81                                      | passed counts:2                                            |
| node_0: feature_name=cg11915444               | feature_id[1171].value ><br>threshold=0.3402601182460785   |
| node_10: feature_name=cg12109728              | feature_id[2810].value ><br>threshold=0.7068270146846771   |
| node_20: feature_name=cg16412000              | feature_id[789].value ><br>threshold=0.6741803884506226    |
| node_24: feature_name=cg17115147              | feature_id[1434].value ><br>threshold=0.2961975038051605   |

|                                            |                                                           |
|--------------------------------------------|-----------------------------------------------------------|
| node_368: feature_name=cg27543578          | feature_id[878].value ><br>threshold=0.8884280920028687   |
| node_372: feature_name=cg11400707          | feature_id[1940].value <=<br>threshold=0.6575311124324799 |
| node_373: feature_name=cg03042971          | feature_id[1579].value <=<br>threshold=0.6336731016635895 |
| Class: giant cell tumour of bone (GCTB)    |                                                           |
| Rules_82                                   | passed counts:2                                           |
| node_0: feature_name=cg11915444            | feature_id[1171].value ><br>threshold=0.3402601182460785  |
| node_10: feature_name=cg12109728           | feature_id[2810].value ><br>threshold=0.7068270146846771  |
| node_20: feature_name=cg16412000           | feature_id[789].value ><br>threshold=0.6741803884506226   |
| node_24: feature_name=cg17115147           | feature_id[1434].value <=<br>threshold=0.2961975038051605 |
| node_25: feature_name=cg24474622           | feature_id[2737].value ><br>threshold=0.7211934924125671  |
| node_29: feature_name=cg10472711           | feature_id[612].value ><br>threshold=0.45985929667949677  |
| node_37: feature_name=cg01937669           | feature_id[188].value ><br>threshold=0.4809463769197464   |
| node_363: feature_name=cg14588828          | feature_id[2222].value <=<br>threshold=0.9071650803089142 |
| node_364: feature_name=cg24881558          | feature_id[3465].value <=<br>threshold=0.7283148765563965 |
| Class: ossifying fibromyxoid tumour (OFMT) |                                                           |
| Rules_83                                   | passed counts:2                                           |
| node_0: feature_name=cg11915444            | feature_id[1171].value ><br>threshold=0.3402601182460785  |
| node_10: feature_name=cg12109728           | feature_id[2810].value ><br>threshold=0.7068270146846771  |
| node_20: feature_name=cg16412000           | feature_id[789].value ><br>threshold=0.6741803884506226   |
| node_24: feature_name=cg17115147           | feature_id[1434].value <=<br>threshold=0.2961975038051605 |
| node_25: feature_name=cg24474622           | feature_id[2737].value ><br>threshold=0.7211934924125671  |
| node_29: feature_name=cg10472711           | feature_id[612].value ><br>threshold=0.45985929667949677  |

|                                            |                                                            |
|--------------------------------------------|------------------------------------------------------------|
| node_37: feature_name=cg01937669           | feature_id[188].value <=<br>threshold=0.4809463769197464   |
| node_38: feature_name=cg02157052           | feature_id[451].value <=<br>threshold=0.2869153320789337   |
| node_39: feature_name=cg18751958           | feature_id[1427].value ><br>threshold=0.4813787043094635   |
| node_41: feature_name=cg22512847           | feature_id[1152].value ><br>threshold=0.5129324495792389   |
| node_43: feature_name=cg23345038           | feature_id[1147].value ><br>threshold=0.6318148374557495   |
| node_45: feature_name=cg17439009           | feature_id[1815].value <=<br>threshold=0.48514117300510406 |
| node_46: feature_name=cg17537493           | feature_id[2772].value ><br>threshold=0.5825372636318207   |
| node_52: feature_name=cg01683570           | feature_id[110].value ><br>threshold=0.6040188074111938    |
| node_54: feature_name=cg15720017           | feature_id[168].value ><br>threshold=0.7067741453647614    |
| node_60: feature_name=cg23690444           | feature_id[120].value <=<br>threshold=0.16037724912166595  |
| node_61: feature_name=cg00567872           | feature_id[236].value ><br>threshold=0.7005765736103058    |
| node_85: feature_name=cg01014262           | feature_id[764].value ><br>threshold=0.5737917125225067    |
| node_331: feature_name=cg16897462          | feature_id[3257].value <=<br>threshold=0.24157879501581192 |
| node_332: feature_name=cg13800349          | feature_id[3278].value ><br>threshold=0.5597856789827347   |
| Class: Langerhans cell histiocytosis (LCH) |                                                            |
| Rules_84                                   | passed counts:2                                            |
| node_0: feature_name=cg11915444            | feature_id[1171].value ><br>threshold=0.3402601182460785   |
| node_10: feature_name=cg12109728           | feature_id[2810].value ><br>threshold=0.7068270146846771   |
| node_20: feature_name=cg16412000           | feature_id[789].value ><br>threshold=0.6741803884506226    |
| node_24: feature_name=cg17115147           | feature_id[1434].value <=<br>threshold=0.2961975038051605  |
| node_25: feature_name=cg24474622           | feature_id[2737].value ><br>threshold=0.7211934924125671   |
| node_29: feature_name=cg10472711           | feature_id[612].value ><br>threshold=0.45985929667949677   |

|                                   |                                                            |
|-----------------------------------|------------------------------------------------------------|
| node_37: feature_name=cg01937669  | feature_id[188].value <=<br>threshold=0.4809463769197464   |
| node_38: feature_name=cg02157052  | feature_id[451].value <=<br>threshold=0.2869153320789337   |
| node_39: feature_name=cg18751958  | feature_id[1427].value ><br>threshold=0.4813787043094635   |
| node_41: feature_name=cg22512847  | feature_id[1152].value ><br>threshold=0.5129324495792389   |
| node_43: feature_name=cg23345038  | feature_id[1147].value ><br>threshold=0.6318148374557495   |
| node_45: feature_name=cg17439009  | feature_id[1815].value <=<br>threshold=0.48514117300510406 |
| node_46: feature_name=cg17537493  | feature_id[2772].value ><br>threshold=0.5825372636318207   |
| node_52: feature_name=cg01683570  | feature_id[110].value ><br>threshold=0.6040188074111938    |
| node_54: feature_name=cg15720017  | feature_id[168].value ><br>threshold=0.7067741453647614    |
| node_60: feature_name=cg23690444  | feature_id[120].value <=<br>threshold=0.16037724912166595  |
| node_61: feature_name=cg00567872  | feature_id[236].value ><br>threshold=0.7005765736103058    |
| node_85: feature_name=cg01014262  | feature_id[764].value ><br>threshold=0.5737917125225067    |
| node_331: feature_name=cg16897462 | feature_id[3257].value <=<br>threshold=0.24157879501581192 |
| node_332: feature_name=cg13800349 | feature_id[3278].value <=<br>threshold=0.5597856789827347  |
| Class: synovial sarcoma (SYSA)    |                                                            |
|                                   |                                                            |
| Rules_85                          | passed counts:2                                            |
| node_0: feature_name=cg11915444   | feature_id[1171].value ><br>threshold=0.3402601182460785   |
| node_10: feature_name=cg12109728  | feature_id[2810].value ><br>threshold=0.7068270146846771   |
| node_20: feature_name=cg16412000  | feature_id[789].value ><br>threshold=0.6741803884506226    |
| node_24: feature_name=cg17115147  | feature_id[1434].value <=<br>threshold=0.2961975038051605  |
| node_25: feature_name=cg24474622  | feature_id[2737].value ><br>threshold=0.7211934924125671   |
| node_29: feature_name=cg10472711  | feature_id[612].value ><br>threshold=0.45985929667949677   |

|                                                                                   |                                                            |
|-----------------------------------------------------------------------------------|------------------------------------------------------------|
| node_37: feature_name=cg01937669                                                  | feature_id[188].value <=<br>threshold=0.4809463769197464   |
| node_38: feature_name=cg02157052                                                  | feature_id[451].value <=<br>threshold=0.2869153320789337   |
| node_39: feature_name=cg18751958                                                  | feature_id[1427].value ><br>threshold=0.4813787043094635   |
| node_41: feature_name=cg22512847                                                  | feature_id[1152].value ><br>threshold=0.5129324495792389   |
| node_43: feature_name=cg23345038                                                  | feature_id[1147].value ><br>threshold=0.6318148374557495   |
| node_45: feature_name=cg17439009                                                  | feature_id[1815].value <=<br>threshold=0.48514117300510406 |
| node_46: feature_name=cg17537493                                                  | feature_id[2772].value ><br>threshold=0.5825372636318207   |
| node_52: feature_name=cg01683570                                                  | feature_id[110].value ><br>threshold=0.6040188074111938    |
| node_54: feature_name=cg15720017                                                  | feature_id[168].value ><br>threshold=0.7067741453647614    |
| node_60: feature_name=cg23690444                                                  | feature_id[120].value <=<br>threshold=0.16037724912166595  |
| node_61: feature_name=cg00567872                                                  | feature_id[236].value ><br>threshold=0.7005765736103058    |
| node_85: feature_name=cg01014262                                                  | feature_id[764].value <=<br>threshold=0.5737917125225067   |
| node_86: feature_name=cg22946562                                                  | feature_id[1148].value ><br>threshold=0.6328203976154327   |
| node_134: feature_name=cg14514032                                                 | feature_id[202].value ><br>threshold=0.4389604330062866    |
| node_312: feature_name=cg21670987                                                 | feature_id[1509].value <=<br>threshold=0.32477423548698425 |
| node_313: feature_name=cg12939390                                                 | feature_id[143].value ><br>threshold=0.23070813715457916   |
| node_315: feature_name=cg10907727                                                 | feature_id[284].value ><br>threshold=0.6596133708953857    |
| node_317: feature_name=cg21241424                                                 | feature_id[1155].value <=<br>threshold=0.7687841951847076  |
| node_318: feature_name=cg19691659                                                 | feature_id[953].value <=<br>threshold=0.6708230972290039   |
| node_319: feature_name=cg04002063                                                 | feature_id[2129].value <=<br>threshold=0.8756260275840759  |
| Class: well differentiated liposarcoma (WDLS)/dedifferentiated liposarcoma (DDLs) |                                                            |
|                                                                                   |                                                            |

|                                   |                                                            |
|-----------------------------------|------------------------------------------------------------|
| Rules_86                          | passed counts:2                                            |
| node_0: feature_name=cg11915444   | feature_id[1171].value ><br>threshold=0.3402601182460785   |
| node_10: feature_name=cg12109728  | feature_id[2810].value ><br>threshold=0.7068270146846771   |
| node_20: feature_name=cg16412000  | feature_id[789].value ><br>threshold=0.6741803884506226    |
| node_24: feature_name=cg17115147  | feature_id[1434].value <=<br>threshold=0.2961975038051605  |
| node_25: feature_name=cg24474622  | feature_id[2737].value ><br>threshold=0.7211934924125671   |
| node_29: feature_name=cg10472711  | feature_id[612].value ><br>threshold=0.45985929667949677   |
| node_37: feature_name=cg01937669  | feature_id[188].value <=<br>threshold=0.4809463769197464   |
| node_38: feature_name=cg02157052  | feature_id[451].value <=<br>threshold=0.2869153320789337   |
| node_39: feature_name=cg18751958  | feature_id[1427].value ><br>threshold=0.4813787043094635   |
| node_41: feature_name=cg22512847  | feature_id[1152].value ><br>threshold=0.5129324495792389   |
| node_43: feature_name=cg23345038  | feature_id[1147].value ><br>threshold=0.6318148374557495   |
| node_45: feature_name=cg17439009  | feature_id[1815].value <=<br>threshold=0.48514117300510406 |
| node_46: feature_name=cg17537493  | feature_id[2772].value ><br>threshold=0.5825372636318207   |
| node_52: feature_name=cg01683570  | feature_id[110].value ><br>threshold=0.6040188074111938    |
| node_54: feature_name=cg15720017  | feature_id[168].value ><br>threshold=0.7067741453647614    |
| node_60: feature_name=cg23690444  | feature_id[120].value <=<br>threshold=0.16037724912166595  |
| node_61: feature_name=cg00567872  | feature_id[236].value ><br>threshold=0.7005765736103058    |
| node_85: feature_name=cg01014262  | feature_id[764].value <=<br>threshold=0.5737917125225067   |
| node_86: feature_name=cg22946562  | feature_id[1148].value ><br>threshold=0.6328203976154327   |
| node_134: feature_name=cg14514032 | feature_id[202].value <=<br>threshold=0.4389604330062866   |
| node_135: feature_name=cg13488220 | feature_id[241].value ><br>threshold=0.7352153658866882    |

|                                                 |                                                            |
|-------------------------------------------------|------------------------------------------------------------|
| node_143: feature_name=cg03840920               | feature_id[256].value ><br>threshold=0.502630889415741     |
| node_147: feature_name=cg13634090               | feature_id[822].value ><br>threshold=0.7207068204879761    |
| node_151: feature_name=cg19584674               | feature_id[2364].value ><br>threshold=0.41758519411087036  |
| node_307: feature_name=cg07795968               | feature_id[2451].value ><br>threshold=0.7859841883182526   |
| node_309: feature_name=cg12552626               | feature_id[687].value ><br>threshold=0.893171489238739     |
| Class: sclerosing epithelioid fibrosarcoma(SEF) |                                                            |
| Rules_87                                        | passed counts:2                                            |
| node_0: feature_name=cg11915444                 | feature_id[1171].value ><br>threshold=0.3402601182460785   |
| node_10: feature_name=cg12109728                | feature_id[2810].value ><br>threshold=0.7068270146846771   |
| node_20: feature_name=cg16412000                | feature_id[789].value ><br>threshold=0.6741803884506226    |
| node_24: feature_name=cg17115147                | feature_id[1434].value <=<br>threshold=0.2961975038051605  |
| node_25: feature_name=cg24474622                | feature_id[2737].value ><br>threshold=0.7211934924125671   |
| node_29: feature_name=cg10472711                | feature_id[612].value ><br>threshold=0.45985929667949677   |
| node_37: feature_name=cg01937669                | feature_id[188].value <=<br>threshold=0.4809463769197464   |
| node_38: feature_name=cg02157052                | feature_id[451].value <=<br>threshold=0.2869153320789337   |
| node_39: feature_name=cg18751958                | feature_id[1427].value ><br>threshold=0.4813787043094635   |
| node_41: feature_name=cg22512847                | feature_id[1152].value ><br>threshold=0.5129324495792389   |
| node_43: feature_name=cg23345038                | feature_id[1147].value ><br>threshold=0.6318148374557495   |
| node_45: feature_name=cg17439009                | feature_id[1815].value <=<br>threshold=0.48514117300510406 |
| node_46: feature_name=cg17537493                | feature_id[2772].value ><br>threshold=0.5825372636318207   |
| node_52: feature_name=cg01683570                | feature_id[110].value ><br>threshold=0.6040188074111938    |
| node_54: feature_name=cg15720017                | feature_id[168].value ><br>threshold=0.7067741453647614    |



|                                   |                                                            |
|-----------------------------------|------------------------------------------------------------|
| node_60: feature_name=cg23690444  | feature_id[120].value <=<br>threshold=0.16037724912166595  |
| node_61: feature_name=cg00567872  | feature_id[236].value ><br>threshold=0.7005765736103058    |
| node_85: feature_name=cg01014262  | feature_id[764].value <=<br>threshold=0.5737917125225067   |
| node_86: feature_name=cg22946562  | feature_id[1148].value ><br>threshold=0.6328203976154327   |
| node_134: feature_name=cg14514032 | feature_id[202].value <=<br>threshold=0.4389604330062866   |
| node_135: feature_name=cg13488220 | feature_id[241].value ><br>threshold=0.7352153658866882    |
| node_143: feature_name=cg03840920 | feature_id[256].value ><br>threshold=0.502630889415741     |
| node_147: feature_name=cg13634090 | feature_id[822].value ><br>threshold=0.7207068204879761    |
| node_151: feature_name=cg19584674 | feature_id[2364].value <=<br>threshold=0.41758519411087036 |
| node_152: feature_name=cg07344990 | feature_id[411].value ><br>threshold=0.5484964847564697    |
| node_158: feature_name=cg10298992 | feature_id[3066].value ><br>threshold=0.5707973837852478   |
| node_174: feature_name=cg11843516 | feature_id[20].value <=<br>threshold=0.5590928494930267    |
| node_175: feature_name=cg05185926 | feature_id[448].value ><br>threshold=0.17318664491176605   |
| node_177: feature_name=cg17009731 | feature_id[1220].value ><br>threshold=0.6666513085365295   |
| node_179: feature_name=cg01380319 | feature_id[515].value <=<br>threshold=0.39251960813999176  |
| node_180: feature_name=cg20700977 | feature_id[303].value ><br>threshold=0.8422040641307831    |
| node_184: feature_name=cg24259291 | feature_id[164].value ><br>threshold=0.4872268736362457    |
| node_188: feature_name=cg08097657 | feature_id[67].value ><br>threshold=0.3371318429708481     |
| node_190: feature_name=cg07891483 | feature_id[59].value ><br>threshold=0.6211732923984528     |
| node_194: feature_name=cg20122645 | feature_id[275].value ><br>threshold=0.6094755828380585    |
| node_196: feature_name=cg04026354 | feature_id[1763].value ><br>threshold=0.4341808259487152   |
| node_286: feature_name=cg25408950 | feature_id[772].value ><br>threshold=0.680083692073822     |

|                                   |                                                            |
|-----------------------------------|------------------------------------------------------------|
| node_290: feature_name=cg15188939 | feature_id[1626].value ><br>threshold=0.6365727782249451   |
| node_294: feature_name=cg00444740 | feature_id[3167].value ><br>threshold=0.5775478780269623   |
| node_296: feature_name=cg03555203 | feature_id[3682].value ><br>threshold=0.8000460863113403   |
| node_298: feature_name=cg26685539 | feature_id[1788].value ><br>threshold=0.8831613063812256   |
| node_300: feature_name=cg02353448 | feature_id[74].value <=<br>threshold=0.9122499525547028    |
| Class: melanoma (MEL)             |                                                            |
| Rules_88                          | passed counts:2                                            |
| node_0: feature_name=cg11915444   | feature_id[1171].value ><br>threshold=0.3402601182460785   |
| node_10: feature_name=cg12109728  | feature_id[2810].value ><br>threshold=0.7068270146846771   |
| node_20: feature_name=cg16412000  | feature_id[789].value ><br>threshold=0.6741803884506226    |
| node_24: feature_name=cg17115147  | feature_id[1434].value <=<br>threshold=0.2961975038051605  |
| node_25: feature_name=cg24474622  | feature_id[2737].value ><br>threshold=0.7211934924125671   |
| node_29: feature_name=cg10472711  | feature_id[612].value ><br>threshold=0.45985929667949677   |
| node_37: feature_name=cg01937669  | feature_id[188].value <=<br>threshold=0.4809463769197464   |
| node_38: feature_name=cg02157052  | feature_id[451].value <=<br>threshold=0.2869153320789337   |
| node_39: feature_name=cg18751958  | feature_id[1427].value ><br>threshold=0.4813787043094635   |
| node_41: feature_name=cg22512847  | feature_id[1152].value ><br>threshold=0.5129324495792389   |
| node_43: feature_name=cg23345038  | feature_id[1147].value ><br>threshold=0.6318148374557495   |
| node_45: feature_name=cg17439009  | feature_id[1815].value <=<br>threshold=0.48514117300510406 |
| node_46: feature_name=cg17537493  | feature_id[2772].value ><br>threshold=0.5825372636318207   |
| node_52: feature_name=cg01683570  | feature_id[110].value ><br>threshold=0.6040188074111938    |
| node_54: feature_name=cg15720017  | feature_id[168].value ><br>threshold=0.7067741453647614    |

|                                   |                                                            |
|-----------------------------------|------------------------------------------------------------|
| node_60: feature_name=cg23690444  | feature_id[120].value <=<br>threshold=0.16037724912166595  |
| node_61: feature_name=cg00567872  | feature_id[236].value ><br>threshold=0.7005765736103058    |
| node_85: feature_name=cg01014262  | feature_id[764].value <=<br>threshold=0.5737917125225067   |
| node_86: feature_name=cg22946562  | feature_id[1148].value ><br>threshold=0.6328203976154327   |
| node_134: feature_name=cg14514032 | feature_id[202].value <=<br>threshold=0.4389604330062866   |
| node_135: feature_name=cg13488220 | feature_id[241].value ><br>threshold=0.7352153658866882    |
| node_143: feature_name=cg03840920 | feature_id[256].value ><br>threshold=0.502630889415741     |
| node_147: feature_name=cg13634090 | feature_id[822].value ><br>threshold=0.7207068204879761    |
| node_151: feature_name=cg19584674 | feature_id[2364].value <=<br>threshold=0.41758519411087036 |
| node_152: feature_name=cg07344990 | feature_id[411].value ><br>threshold=0.5484964847564697    |
| node_158: feature_name=cg10298992 | feature_id[3066].value ><br>threshold=0.5707973837852478   |
| node_174: feature_name=cg11843516 | feature_id[20].value <=<br>threshold=0.5590928494930267    |
| node_175: feature_name=cg05185926 | feature_id[448].value ><br>threshold=0.17318664491176605   |
| node_177: feature_name=cg17009731 | feature_id[1220].value ><br>threshold=0.6666513085365295   |
| node_179: feature_name=cg01380319 | feature_id[515].value <=<br>threshold=0.39251960813999176  |
| node_180: feature_name=cg20700977 | feature_id[303].value ><br>threshold=0.8422040641307831    |
| node_184: feature_name=cg24259291 | feature_id[164].value ><br>threshold=0.4872268736362457    |
| node_188: feature_name=cg08097657 | feature_id[67].value ><br>threshold=0.3371318429708481     |
| node_190: feature_name=cg07891483 | feature_id[59].value ><br>threshold=0.6211732923984528     |
| node_194: feature_name=cg20122645 | feature_id[275].value ><br>threshold=0.6094755828380585    |
| node_196: feature_name=cg04026354 | feature_id[1763].value ><br>threshold=0.4341808259487152   |
| node_286: feature_name=cg25408950 | feature_id[772].value ><br>threshold=0.680083692073822     |

|                                                                                   |                                                            |
|-----------------------------------------------------------------------------------|------------------------------------------------------------|
| node_290: feature_name=cg15188939                                                 | feature_id[1626].value ><br>threshold=0.6365727782249451   |
| node_294: feature_name=cg00444740                                                 | feature_id[3167].value ><br>threshold=0.5775478780269623   |
| node_296: feature_name=cg03555203                                                 | feature_id[3682].value ><br>threshold=0.8000460863113403   |
| node_298: feature_name=cg26685539                                                 | feature_id[1788].value <=<br>threshold=0.8831613063812256  |
| Class: well differentiated liposarcoma (WDLS)/dedifferentiated liposarcoma (DDLs) |                                                            |
|                                                                                   |                                                            |
| Rules_89                                                                          | passed counts:2                                            |
| node_0: feature_name=cg11915444                                                   | feature_id[1171].value ><br>threshold=0.3402601182460785   |
| node_10: feature_name=cg12109728                                                  | feature_id[2810].value ><br>threshold=0.7068270146846771   |
| node_20: feature_name=cg16412000                                                  | feature_id[789].value ><br>threshold=0.6741803884506226    |
| node_24: feature_name=cg17115147                                                  | feature_id[1434].value <=<br>threshold=0.2961975038051605  |
| node_25: feature_name=cg24474622                                                  | feature_id[2737].value ><br>threshold=0.7211934924125671   |
| node_29: feature_name=cg10472711                                                  | feature_id[612].value ><br>threshold=0.45985929667949677   |
| node_37: feature_name=cg01937669                                                  | feature_id[188].value <=<br>threshold=0.4809463769197464   |
| node_38: feature_name=cg02157052                                                  | feature_id[451].value <=<br>threshold=0.2869153320789337   |
| node_39: feature_name=cg18751958                                                  | feature_id[1427].value ><br>threshold=0.4813787043094635   |
| node_41: feature_name=cg22512847                                                  | feature_id[1152].value ><br>threshold=0.5129324495792389   |
| node_43: feature_name=cg23345038                                                  | feature_id[1147].value ><br>threshold=0.6318148374557495   |
| node_45: feature_name=cg17439009                                                  | feature_id[1815].value <=<br>threshold=0.48514117300510406 |
| node_46: feature_name=cg17537493                                                  | feature_id[2772].value ><br>threshold=0.5825372636318207   |
| node_52: feature_name=cg01683570                                                  | feature_id[110].value ><br>threshold=0.6040188074111938    |
| node_54: feature_name=cg15720017                                                  | feature_id[168].value ><br>threshold=0.7067741453647614    |

|                                   |                                                            |
|-----------------------------------|------------------------------------------------------------|
| node_60: feature_name=cg23690444  | feature_id[120].value <=<br>threshold=0.16037724912166595  |
| node_61: feature_name=cg00567872  | feature_id[236].value ><br>threshold=0.7005765736103058    |
| node_85: feature_name=cg01014262  | feature_id[764].value <=<br>threshold=0.5737917125225067   |
| node_86: feature_name=cg22946562  | feature_id[1148].value ><br>threshold=0.6328203976154327   |
| node_134: feature_name=cg14514032 | feature_id[202].value <=<br>threshold=0.4389604330062866   |
| node_135: feature_name=cg13488220 | feature_id[241].value ><br>threshold=0.7352153658866882    |
| node_143: feature_name=cg03840920 | feature_id[256].value ><br>threshold=0.502630889415741     |
| node_147: feature_name=cg13634090 | feature_id[822].value ><br>threshold=0.7207068204879761    |
| node_151: feature_name=cg19584674 | feature_id[2364].value <=<br>threshold=0.41758519411087036 |
| node_152: feature_name=cg07344990 | feature_id[411].value ><br>threshold=0.5484964847564697    |
| node_158: feature_name=cg10298992 | feature_id[3066].value ><br>threshold=0.5707973837852478   |
| node_174: feature_name=cg11843516 | feature_id[20].value <=<br>threshold=0.5590928494930267    |
| node_175: feature_name=cg05185926 | feature_id[448].value ><br>threshold=0.17318664491176605   |
| node_177: feature_name=cg17009731 | feature_id[1220].value ><br>threshold=0.6666513085365295   |
| node_179: feature_name=cg01380319 | feature_id[515].value <=<br>threshold=0.39251960813999176  |
| node_180: feature_name=cg20700977 | feature_id[303].value ><br>threshold=0.8422040641307831    |
| node_184: feature_name=cg24259291 | feature_id[164].value ><br>threshold=0.4872268736362457    |
| node_188: feature_name=cg08097657 | feature_id[67].value ><br>threshold=0.3371318429708481     |
| node_190: feature_name=cg07891483 | feature_id[59].value ><br>threshold=0.6211732923984528     |
| node_194: feature_name=cg20122645 | feature_id[275].value ><br>threshold=0.6094755828380585    |
| node_196: feature_name=cg04026354 | feature_id[1763].value ><br>threshold=0.4341808259487152   |
| node_286: feature_name=cg25408950 | feature_id[772].value ><br>threshold=0.680083692073822     |

|                                   |                                                            |
|-----------------------------------|------------------------------------------------------------|
| node_290: feature_name=cg15188939 | feature_id[1626].value ><br>threshold=0.6365727782249451   |
| node_294: feature_name=cg00444740 | feature_id[3167].value ><br>threshold=0.5775478780269623   |
| node_296: feature_name=cg03555203 | feature_id[3682].value <=<br>threshold=0.8000460863113403  |
| Class: Kaposi sarcoma (KS)        |                                                            |
| Rules_90                          | passed counts:2                                            |
| node_0: feature_name=cg11915444   | feature_id[1171].value ><br>threshold=0.3402601182460785   |
| node_10: feature_name=cg12109728  | feature_id[2810].value ><br>threshold=0.7068270146846771   |
| node_20: feature_name=cg16412000  | feature_id[789].value ><br>threshold=0.6741803884506226    |
| node_24: feature_name=cg17115147  | feature_id[1434].value <=<br>threshold=0.2961975038051605  |
| node_25: feature_name=cg24474622  | feature_id[2737].value ><br>threshold=0.7211934924125671   |
| node_29: feature_name=cg10472711  | feature_id[612].value ><br>threshold=0.45985929667949677   |
| node_37: feature_name=cg01937669  | feature_id[188].value <=<br>threshold=0.4809463769197464   |
| node_38: feature_name=cg02157052  | feature_id[451].value <=<br>threshold=0.2869153320789337   |
| node_39: feature_name=cg18751958  | feature_id[1427].value ><br>threshold=0.4813787043094635   |
| node_41: feature_name=cg22512847  | feature_id[1152].value ><br>threshold=0.5129324495792389   |
| node_43: feature_name=cg23345038  | feature_id[1147].value ><br>threshold=0.6318148374557495   |
| node_45: feature_name=cg17439009  | feature_id[1815].value <=<br>threshold=0.48514117300510406 |
| node_46: feature_name=cg17537493  | feature_id[2772].value ><br>threshold=0.5825372636318207   |
| node_52: feature_name=cg01683570  | feature_id[110].value ><br>threshold=0.6040188074111938    |
| node_54: feature_name=cg15720017  | feature_id[168].value ><br>threshold=0.7067741453647614    |
| node_60: feature_name=cg23690444  | feature_id[120].value <=<br>threshold=0.16037724912166595  |
| node_61: feature_name=cg00567872  | feature_id[236].value ><br>threshold=0.7005765736103058    |

|                                   |                                                            |
|-----------------------------------|------------------------------------------------------------|
| node_85: feature_name=cg01014262  | feature_id[764].value <=<br>threshold=0.5737917125225067   |
| node_86: feature_name=cg22946562  | feature_id[1148].value ><br>threshold=0.6328203976154327   |
| node_134: feature_name=cg14514032 | feature_id[202].value <=<br>threshold=0.4389604330062866   |
| node_135: feature_name=cg13488220 | feature_id[241].value ><br>threshold=0.7352153658866882    |
| node_143: feature_name=cg03840920 | feature_id[256].value ><br>threshold=0.502630889415741     |
| node_147: feature_name=cg13634090 | feature_id[822].value ><br>threshold=0.7207068204879761    |
| node_151: feature_name=cg19584674 | feature_id[2364].value <=<br>threshold=0.41758519411087036 |
| node_152: feature_name=cg07344990 | feature_id[411].value ><br>threshold=0.5484964847564697    |
| node_158: feature_name=cg10298992 | feature_id[3066].value ><br>threshold=0.5707973837852478   |
| node_174: feature_name=cg11843516 | feature_id[20].value <=<br>threshold=0.5590928494930267    |
| node_175: feature_name=cg05185926 | feature_id[448].value ><br>threshold=0.17318664491176605   |
| node_177: feature_name=cg17009731 | feature_id[1220].value ><br>threshold=0.6666513085365295   |
| node_179: feature_name=cg01380319 | feature_id[515].value <=<br>threshold=0.39251960813999176  |
| node_180: feature_name=cg20700977 | feature_id[303].value ><br>threshold=0.8422040641307831    |
| node_184: feature_name=cg24259291 | feature_id[164].value ><br>threshold=0.4872268736362457    |
| node_188: feature_name=cg08097657 | feature_id[67].value ><br>threshold=0.3371318429708481     |
| node_190: feature_name=cg07891483 | feature_id[59].value ><br>threshold=0.6211732923984528     |
| node_194: feature_name=cg20122645 | feature_id[275].value ><br>threshold=0.6094755828380585    |
| node_196: feature_name=cg04026354 | feature_id[1763].value ><br>threshold=0.4341808259487152   |
| node_286: feature_name=cg25408950 | feature_id[772].value ><br>threshold=0.680083692073822     |
| node_290: feature_name=cg15188939 | feature_id[1626].value ><br>threshold=0.6365727782249451   |
| node_294: feature_name=cg00444740 | feature_id[3167].value <=<br>threshold=0.5775478780269623  |

|                                   |                                                            |
|-----------------------------------|------------------------------------------------------------|
| Class: chordoma (CHORD)           |                                                            |
| Rules_91                          | passed counts:2                                            |
| node_0: feature_name=cg11915444   | feature_id[1171].value ><br>threshold=0.3402601182460785   |
| node_10: feature_name=cg12109728  | feature_id[2810].value ><br>threshold=0.7068270146846771   |
| node_20: feature_name=cg16412000  | feature_id[789].value ><br>threshold=0.6741803884506226    |
| node_24: feature_name=cg17115147  | feature_id[1434].value <=<br>threshold=0.2961975038051605  |
| node_25: feature_name=cg24474622  | feature_id[2737].value ><br>threshold=0.7211934924125671   |
| node_29: feature_name=cg10472711  | feature_id[612].value ><br>threshold=0.45985929667949677   |
| node_37: feature_name=cg01937669  | feature_id[188].value <=<br>threshold=0.4809463769197464   |
| node_38: feature_name=cg02157052  | feature_id[451].value <=<br>threshold=0.2869153320789337   |
| node_39: feature_name=cg18751958  | feature_id[1427].value ><br>threshold=0.4813787043094635   |
| node_41: feature_name=cg22512847  | feature_id[1152].value ><br>threshold=0.5129324495792389   |
| node_43: feature_name=cg23345038  | feature_id[1147].value ><br>threshold=0.6318148374557495   |
| node_45: feature_name=cg17439009  | feature_id[1815].value <=<br>threshold=0.48514117300510406 |
| node_46: feature_name=cg17537493  | feature_id[2772].value ><br>threshold=0.5825372636318207   |
| node_52: feature_name=cg01683570  | feature_id[110].value ><br>threshold=0.6040188074111938    |
| node_54: feature_name=cg15720017  | feature_id[168].value ><br>threshold=0.7067741453647614    |
| node_60: feature_name=cg23690444  | feature_id[120].value <=<br>threshold=0.16037724912166595  |
| node_61: feature_name=cg00567872  | feature_id[236].value ><br>threshold=0.7005765736103058    |
| node_85: feature_name=cg01014262  | feature_id[764].value <=<br>threshold=0.5737917125225067   |
| node_86: feature_name=cg22946562  | feature_id[1148].value ><br>threshold=0.6328203976154327   |
| node_134: feature_name=cg14514032 | feature_id[202].value <=<br>threshold=0.4389604330062866   |



|                                   |                                                            |
|-----------------------------------|------------------------------------------------------------|
| node_135: feature_name=cg13488220 | feature_id[241].value ><br>threshold=0.7352153658866882    |
| node_143: feature_name=cg03840920 | feature_id[256].value ><br>threshold=0.502630889415741     |
| node_147: feature_name=cg13634090 | feature_id[822].value ><br>threshold=0.7207068204879761    |
| node_151: feature_name=cg19584674 | feature_id[2364].value <=<br>threshold=0.41758519411087036 |
| node_152: feature_name=cg07344990 | feature_id[411].value ><br>threshold=0.5484964847564697    |
| node_158: feature_name=cg10298992 | feature_id[3066].value ><br>threshold=0.5707973837852478   |
| node_174: feature_name=cg11843516 | feature_id[20].value <=<br>threshold=0.5590928494930267    |
| node_175: feature_name=cg05185926 | feature_id[448].value ><br>threshold=0.17318664491176605   |
| node_177: feature_name=cg17009731 | feature_id[1220].value ><br>threshold=0.6666513085365295   |
| node_179: feature_name=cg01380319 | feature_id[515].value <=<br>threshold=0.39251960813999176  |
| node_180: feature_name=cg20700977 | feature_id[303].value ><br>threshold=0.8422040641307831    |
| node_184: feature_name=cg24259291 | feature_id[164].value ><br>threshold=0.4872268736362457    |
| node_188: feature_name=cg08097657 | feature_id[67].value ><br>threshold=0.3371318429708481     |
| node_190: feature_name=cg07891483 | feature_id[59].value ><br>threshold=0.6211732923984528     |
| node_194: feature_name=cg20122645 | feature_id[275].value ><br>threshold=0.6094755828380585    |
| node_196: feature_name=cg04026354 | feature_id[1763].value ><br>threshold=0.4341808259487152   |
| node_286: feature_name=cg25408950 | feature_id[772].value <=<br>threshold=0.680083692073822    |
| node_287: feature_name=cg17216243 | feature_id[1006].value ><br>threshold=0.6291826963424683   |
| Class: chordoma (CHORD)           |                                                            |
|                                   |                                                            |
| Rules_92                          | passed counts:2                                            |
| node_0: feature_name=cg11915444   | feature_id[1171].value ><br>threshold=0.3402601182460785   |
| node_10: feature_name=cg12109728  | feature_id[2810].value ><br>threshold=0.7068270146846771   |

|                                   |                                                            |
|-----------------------------------|------------------------------------------------------------|
| node_20: feature_name=cg16412000  | feature_id[789].value ><br>threshold=0.6741803884506226    |
| node_24: feature_name=cg17115147  | feature_id[1434].value <=<br>threshold=0.2961975038051605  |
| node_25: feature_name=cg24474622  | feature_id[2737].value ><br>threshold=0.7211934924125671   |
| node_29: feature_name=cg10472711  | feature_id[612].value ><br>threshold=0.45985929667949677   |
| node_37: feature_name=cg01937669  | feature_id[188].value <=<br>threshold=0.4809463769197464   |
| node_38: feature_name=cg02157052  | feature_id[451].value <=<br>threshold=0.2869153320789337   |
| node_39: feature_name=cg18751958  | feature_id[1427].value ><br>threshold=0.4813787043094635   |
| node_41: feature_name=cg22512847  | feature_id[1152].value ><br>threshold=0.5129324495792389   |
| node_43: feature_name=cg23345038  | feature_id[1147].value ><br>threshold=0.6318148374557495   |
| node_45: feature_name=cg17439009  | feature_id[1815].value <=<br>threshold=0.48514117300510406 |
| node_46: feature_name=cg17537493  | feature_id[2772].value ><br>threshold=0.5825372636318207   |
| node_52: feature_name=cg01683570  | feature_id[110].value ><br>threshold=0.6040188074111938    |
| node_54: feature_name=cg15720017  | feature_id[168].value ><br>threshold=0.7067741453647614    |
| node_60: feature_name=cg23690444  | feature_id[120].value <=<br>threshold=0.16037724912166595  |
| node_61: feature_name=cg00567872  | feature_id[236].value ><br>threshold=0.7005765736103058    |
| node_85: feature_name=cg01014262  | feature_id[764].value <=<br>threshold=0.5737917125225067   |
| node_86: feature_name=cg22946562  | feature_id[1148].value ><br>threshold=0.6328203976154327   |
| node_134: feature_name=cg14514032 | feature_id[202].value <=<br>threshold=0.4389604330062866   |
| node_135: feature_name=cg13488220 | feature_id[241].value ><br>threshold=0.7352153658866882    |
| node_143: feature_name=cg03840920 | feature_id[256].value ><br>threshold=0.502630889415741     |
| node_147: feature_name=cg13634090 | feature_id[822].value ><br>threshold=0.7207068204879761    |
| node_151: feature_name=cg19584674 | feature_id[2364].value <=<br>threshold=0.41758519411087036 |

|                                                                                   |                                                           |
|-----------------------------------------------------------------------------------|-----------------------------------------------------------|
| node_152: feature_name=cg07344990                                                 | feature_id[411].value ><br>threshold=0.5484964847564697   |
| node_158: feature_name=cg10298992                                                 | feature_id[3066].value ><br>threshold=0.5707973837852478  |
| node_174: feature_name=cg11843516                                                 | feature_id[20].value <=<br>threshold=0.5590928494930267   |
| node_175: feature_name=cg05185926                                                 | feature_id[448].value ><br>threshold=0.17318664491176605  |
| node_177: feature_name=cg17009731                                                 | feature_id[1220].value ><br>threshold=0.6666513085365295  |
| node_179: feature_name=cg01380319                                                 | feature_id[515].value <=<br>threshold=0.39251960813999176 |
| node_180: feature_name=cg20700977                                                 | feature_id[303].value ><br>threshold=0.8422040641307831   |
| node_184: feature_name=cg24259291                                                 | feature_id[164].value ><br>threshold=0.4872268736362457   |
| node_188: feature_name=cg08097657                                                 | feature_id[67].value ><br>threshold=0.3371318429708481    |
| node_190: feature_name=cg07891483                                                 | feature_id[59].value ><br>threshold=0.6211732923984528    |
| node_194: feature_name=cg20122645                                                 | feature_id[275].value ><br>threshold=0.6094755828380585   |
| node_196: feature_name=cg04026354                                                 | feature_id[1763].value <=<br>threshold=0.4341808259487152 |
| node_197: feature_name=cg10149889                                                 | feature_id[1017].value ><br>threshold=0.6150195300579071  |
| node_201: feature_name=cg14890730                                                 | feature_id[337].value <=<br>threshold=0.4372602105140686  |
| node_202: feature_name=cg08331427                                                 | feature_id[132].value ><br>threshold=0.5443233847618103   |
| node_208: feature_name=cg22730007                                                 | feature_id[2544].value ><br>threshold=0.28619489073753357 |
| node_210: feature_name=cg17193551                                                 | feature_id[2057].value ><br>threshold=0.4393353909254074  |
| node_212: feature_name=cg14671764                                                 | feature_id[584].value ><br>threshold=0.9353199899196625   |
| node_268: feature_name=cg21377260                                                 | feature_id[534].value ><br>threshold=0.9840706288814545   |
| node_276: feature_name=cg20934096                                                 | feature_id[251].value <=<br>threshold=0.7597180306911469  |
| Class: well differentiated liposarcoma (WDLS)/dedifferentiated liposarcoma (DDLs) |                                                           |
|                                                                                   |                                                           |

|                                   |                                                            |
|-----------------------------------|------------------------------------------------------------|
| Rules_93                          | passed counts:2                                            |
| node_0: feature_name=cg11915444   | feature_id[1171].value ><br>threshold=0.3402601182460785   |
| node_10: feature_name=cg12109728  | feature_id[2810].value ><br>threshold=0.7068270146846771   |
| node_20: feature_name=cg16412000  | feature_id[789].value ><br>threshold=0.6741803884506226    |
| node_24: feature_name=cg17115147  | feature_id[1434].value <=<br>threshold=0.2961975038051605  |
| node_25: feature_name=cg24474622  | feature_id[2737].value ><br>threshold=0.7211934924125671   |
| node_29: feature_name=cg10472711  | feature_id[612].value ><br>threshold=0.45985929667949677   |
| node_37: feature_name=cg01937669  | feature_id[188].value <=<br>threshold=0.4809463769197464   |
| node_38: feature_name=cg02157052  | feature_id[451].value <=<br>threshold=0.2869153320789337   |
| node_39: feature_name=cg18751958  | feature_id[1427].value ><br>threshold=0.4813787043094635   |
| node_41: feature_name=cg22512847  | feature_id[1152].value ><br>threshold=0.5129324495792389   |
| node_43: feature_name=cg23345038  | feature_id[1147].value ><br>threshold=0.6318148374557495   |
| node_45: feature_name=cg17439009  | feature_id[1815].value <=<br>threshold=0.48514117300510406 |
| node_46: feature_name=cg17537493  | feature_id[2772].value ><br>threshold=0.5825372636318207   |
| node_52: feature_name=cg01683570  | feature_id[110].value ><br>threshold=0.6040188074111938    |
| node_54: feature_name=cg15720017  | feature_id[168].value ><br>threshold=0.7067741453647614    |
| node_60: feature_name=cg23690444  | feature_id[120].value <=<br>threshold=0.16037724912166595  |
| node_61: feature_name=cg00567872  | feature_id[236].value ><br>threshold=0.7005765736103058    |
| node_85: feature_name=cg01014262  | feature_id[764].value <=<br>threshold=0.5737917125225067   |
| node_86: feature_name=cg22946562  | feature_id[1148].value ><br>threshold=0.6328203976154327   |
| node_134: feature_name=cg14514032 | feature_id[202].value <=<br>threshold=0.4389604330062866   |
| node_135: feature_name=cg13488220 | feature_id[241].value ><br>threshold=0.7352153658866882    |

|                                   |                                                            |
|-----------------------------------|------------------------------------------------------------|
| node_143: feature_name=cg03840920 | feature_id[256].value ><br>threshold=0.502630889415741     |
| node_147: feature_name=cg13634090 | feature_id[822].value ><br>threshold=0.7207068204879761    |
| node_151: feature_name=cg19584674 | feature_id[2364].value <=<br>threshold=0.41758519411087036 |
| node_152: feature_name=cg07344990 | feature_id[411].value ><br>threshold=0.5484964847564697    |
| node_158: feature_name=cg10298992 | feature_id[3066].value ><br>threshold=0.5707973837852478   |
| node_174: feature_name=cg11843516 | feature_id[20].value <=<br>threshold=0.5590928494930267    |
| node_175: feature_name=cg05185926 | feature_id[448].value ><br>threshold=0.17318664491176605   |
| node_177: feature_name=cg17009731 | feature_id[1220].value ><br>threshold=0.6666513085365295   |
| node_179: feature_name=cg01380319 | feature_id[515].value <=<br>threshold=0.39251960813999176  |
| node_180: feature_name=cg20700977 | feature_id[303].value ><br>threshold=0.8422040641307831    |
| node_184: feature_name=cg24259291 | feature_id[164].value ><br>threshold=0.4872268736362457    |
| node_188: feature_name=cg08097657 | feature_id[67].value ><br>threshold=0.3371318429708481     |
| node_190: feature_name=cg07891483 | feature_id[59].value ><br>threshold=0.6211732923984528     |
| node_194: feature_name=cg20122645 | feature_id[275].value ><br>threshold=0.6094755828380585    |
| node_196: feature_name=cg04026354 | feature_id[1763].value <=<br>threshold=0.4341808259487152  |
| node_197: feature_name=cg10149889 | feature_id[1017].value ><br>threshold=0.6150195300579071   |
| node_201: feature_name=cg14890730 | feature_id[337].value <=<br>threshold=0.4372602105140686   |
| node_202: feature_name=cg08331427 | feature_id[132].value ><br>threshold=0.5443233847618103    |
| node_208: feature_name=cg22730007 | feature_id[2544].value ><br>threshold=0.28619489073753357  |
| node_210: feature_name=cg17193551 | feature_id[2057].value ><br>threshold=0.4393353909254074   |
| node_212: feature_name=cg14671764 | feature_id[584].value ><br>threshold=0.9353199899196625    |
| node_268: feature_name=cg21377260 | feature_id[534].value <=<br>threshold=0.9840706288814545   |

|                                   |                                                            |
|-----------------------------------|------------------------------------------------------------|
| node_269: feature_name=cg27143326 | feature_id[1403].value <=<br>threshold=0.8949433267116547  |
| node_270: feature_name=cg01339351 | feature_id[2694].value ><br>threshold=0.8992902934551239   |
| Class: chondroblastoma (CB)       |                                                            |
| Rules_94                          | passed counts:2                                            |
| node_0: feature_name=cg11915444   | feature_id[1171].value ><br>threshold=0.3402601182460785   |
| node_10: feature_name=cg12109728  | feature_id[2810].value ><br>threshold=0.7068270146846771   |
| node_20: feature_name=cg16412000  | feature_id[789].value ><br>threshold=0.6741803884506226    |
| node_24: feature_name=cg17115147  | feature_id[1434].value <=<br>threshold=0.2961975038051605  |
| node_25: feature_name=cg24474622  | feature_id[2737].value ><br>threshold=0.7211934924125671   |
| node_29: feature_name=cg10472711  | feature_id[612].value ><br>threshold=0.45985929667949677   |
| node_37: feature_name=cg01937669  | feature_id[188].value <=<br>threshold=0.4809463769197464   |
| node_38: feature_name=cg02157052  | feature_id[451].value <=<br>threshold=0.2869153320789337   |
| node_39: feature_name=cg18751958  | feature_id[1427].value ><br>threshold=0.4813787043094635   |
| node_41: feature_name=cg22512847  | feature_id[1152].value ><br>threshold=0.5129324495792389   |
| node_43: feature_name=cg23345038  | feature_id[1147].value ><br>threshold=0.6318148374557495   |
| node_45: feature_name=cg17439009  | feature_id[1815].value <=<br>threshold=0.48514117300510406 |
| node_46: feature_name=cg17537493  | feature_id[2772].value ><br>threshold=0.5825372636318207   |
| node_52: feature_name=cg01683570  | feature_id[110].value ><br>threshold=0.6040188074111938    |
| node_54: feature_name=cg15720017  | feature_id[168].value ><br>threshold=0.7067741453647614    |
| node_60: feature_name=cg23690444  | feature_id[120].value <=<br>threshold=0.16037724912166595  |
| node_61: feature_name=cg00567872  | feature_id[236].value ><br>threshold=0.7005765736103058    |
| node_85: feature_name=cg01014262  | feature_id[764].value <=<br>threshold=0.5737917125225067   |

|                                   |                                                            |
|-----------------------------------|------------------------------------------------------------|
| node_86: feature_name=cg22946562  | feature_id[1148].value ><br>threshold=0.6328203976154327   |
| node_134: feature_name=cg14514032 | feature_id[202].value <=<br>threshold=0.4389604330062866   |
| node_135: feature_name=cg13488220 | feature_id[241].value ><br>threshold=0.7352153658866882    |
| node_143: feature_name=cg03840920 | feature_id[256].value ><br>threshold=0.502630889415741     |
| node_147: feature_name=cg13634090 | feature_id[822].value ><br>threshold=0.7207068204879761    |
| node_151: feature_name=cg19584674 | feature_id[2364].value <=<br>threshold=0.41758519411087036 |
| node_152: feature_name=cg07344990 | feature_id[411].value ><br>threshold=0.5484964847564697    |
| node_158: feature_name=cg10298992 | feature_id[3066].value ><br>threshold=0.5707973837852478   |
| node_174: feature_name=cg11843516 | feature_id[20].value <=<br>threshold=0.5590928494930267    |
| node_175: feature_name=cg05185926 | feature_id[448].value ><br>threshold=0.17318664491176605   |
| node_177: feature_name=cg17009731 | feature_id[1220].value ><br>threshold=0.6666513085365295   |
| node_179: feature_name=cg01380319 | feature_id[515].value <=<br>threshold=0.39251960813999176  |
| node_180: feature_name=cg20700977 | feature_id[303].value ><br>threshold=0.8422040641307831    |
| node_184: feature_name=cg24259291 | feature_id[164].value ><br>threshold=0.4872268736362457    |
| node_188: feature_name=cg08097657 | feature_id[67].value ><br>threshold=0.3371318429708481     |
| node_190: feature_name=cg07891483 | feature_id[59].value ><br>threshold=0.6211732923984528     |
| node_194: feature_name=cg20122645 | feature_id[275].value ><br>threshold=0.6094755828380585    |
| node_196: feature_name=cg04026354 | feature_id[1763].value <=<br>threshold=0.4341808259487152  |
| node_197: feature_name=cg10149889 | feature_id[1017].value ><br>threshold=0.6150195300579071   |
| node_201: feature_name=cg14890730 | feature_id[337].value <=<br>threshold=0.4372602105140686   |
| node_202: feature_name=cg08331427 | feature_id[132].value ><br>threshold=0.5443233847618103    |
| node_208: feature_name=cg22730007 | feature_id[2544].value ><br>threshold=0.28619489073753357  |

|                                               |                                                           |
|-----------------------------------------------|-----------------------------------------------------------|
| node_210: feature_name=cg17193551             | feature_id[2057].value ><br>threshold=0.4393353909254074  |
| node_212: feature_name=cg14671764             | feature_id[584].value <=<br>threshold=0.9353199899196625  |
| node_213: feature_name=cg20140662             | feature_id[2044].value ><br>threshold=0.38030287623405457 |
| node_215: feature_name=cg07891483             | feature_id[59].value ><br>threshold=0.829958975315094     |
| node_219: feature_name=cg04884579             | feature_id[1861].value ><br>threshold=0.6106154918670654  |
| node_229: feature_name=cg19548524             | feature_id[2985].value ><br>threshold=0.8623353838920593  |
| node_233: feature_name=cg14788686             | feature_id[3556].value ><br>threshold=0.35090239346027374 |
| node_235: feature_name=cg05380734             | feature_id[2470].value <=<br>threshold=0.7112160623073578 |
| node_236: feature_name=cg01166827             | feature_id[3708].value ><br>threshold=0.6359498500823975  |
| node_238: feature_name=cg13251842             | feature_id[714].value ><br>threshold=0.8916542232036591   |
| node_240: feature_name=cg02829279             | feature_id[623].value ><br>threshold=0.450528159737587    |
| node_242: feature_name=cg24358599             | feature_id[86].value ><br>threshold=0.8132582604885101    |
| node_246: feature_name=cg05544807             | feature_id[3661].value <=<br>threshold=0.6726464331150055 |
| node_247: feature_name=cg05056653             | feature_id[3122].value ><br>threshold=0.35445791482925415 |
| node_249: feature_name=cg26308909             | feature_id[770].value ><br>threshold=0.3754204213619232   |
| node_251: feature_name=cg11197908             | feature_id[3058].value ><br>threshold=0.36795753240585327 |
| node_253: feature_name=cg00039385             | feature_id[646].value ><br>threshold=0.18521490693092346  |
| Class: embryonal rhabdomyosarcoma (RMS (EMB)) |                                                           |
|                                               |                                                           |
| Rules_95                                      | passed counts:2                                           |
| node_0: feature_name=cg11915444               | feature_id[1171].value ><br>threshold=0.3402601182460785  |
| node_10: feature_name=cg12109728              | feature_id[2810].value ><br>threshold=0.7068270146846771  |



|                                   |                                                            |
|-----------------------------------|------------------------------------------------------------|
| node_20: feature_name=cg16412000  | feature_id[789].value ><br>threshold=0.6741803884506226    |
| node_24: feature_name=cg17115147  | feature_id[1434].value <=<br>threshold=0.2961975038051605  |
| node_25: feature_name=cg24474622  | feature_id[2737].value ><br>threshold=0.7211934924125671   |
| node_29: feature_name=cg10472711  | feature_id[612].value ><br>threshold=0.45985929667949677   |
| node_37: feature_name=cg01937669  | feature_id[188].value <=<br>threshold=0.4809463769197464   |
| node_38: feature_name=cg02157052  | feature_id[451].value <=<br>threshold=0.2869153320789337   |
| node_39: feature_name=cg18751958  | feature_id[1427].value ><br>threshold=0.4813787043094635   |
| node_41: feature_name=cg22512847  | feature_id[1152].value ><br>threshold=0.5129324495792389   |
| node_43: feature_name=cg23345038  | feature_id[1147].value ><br>threshold=0.6318148374557495   |
| node_45: feature_name=cg17439009  | feature_id[1815].value <=<br>threshold=0.48514117300510406 |
| node_46: feature_name=cg17537493  | feature_id[2772].value ><br>threshold=0.5825372636318207   |
| node_52: feature_name=cg01683570  | feature_id[110].value ><br>threshold=0.6040188074111938    |
| node_54: feature_name=cg15720017  | feature_id[168].value ><br>threshold=0.7067741453647614    |
| node_60: feature_name=cg23690444  | feature_id[120].value <=<br>threshold=0.16037724912166595  |
| node_61: feature_name=cg00567872  | feature_id[236].value ><br>threshold=0.7005765736103058    |
| node_85: feature_name=cg01014262  | feature_id[764].value <=<br>threshold=0.5737917125225067   |
| node_86: feature_name=cg22946562  | feature_id[1148].value ><br>threshold=0.6328203976154327   |
| node_134: feature_name=cg14514032 | feature_id[202].value <=<br>threshold=0.4389604330062866   |
| node_135: feature_name=cg13488220 | feature_id[241].value ><br>threshold=0.7352153658866882    |
| node_143: feature_name=cg03840920 | feature_id[256].value ><br>threshold=0.502630889415741     |
| node_147: feature_name=cg13634090 | feature_id[822].value ><br>threshold=0.7207068204879761    |
| node_151: feature_name=cg19584674 | feature_id[2364].value <=<br>threshold=0.41758519411087036 |

|                                   |                                                           |
|-----------------------------------|-----------------------------------------------------------|
| node_152: feature_name=cg07344990 | feature_id[411].value ><br>threshold=0.5484964847564697   |
| node_158: feature_name=cg10298992 | feature_id[3066].value ><br>threshold=0.5707973837852478  |
| node_174: feature_name=cg11843516 | feature_id[20].value <=<br>threshold=0.5590928494930267   |
| node_175: feature_name=cg05185926 | feature_id[448].value ><br>threshold=0.17318664491176605  |
| node_177: feature_name=cg17009731 | feature_id[1220].value ><br>threshold=0.6666513085365295  |
| node_179: feature_name=cg01380319 | feature_id[515].value <=<br>threshold=0.39251960813999176 |
| node_180: feature_name=cg20700977 | feature_id[303].value ><br>threshold=0.8422040641307831   |
| node_184: feature_name=cg24259291 | feature_id[164].value ><br>threshold=0.4872268736362457   |
| node_188: feature_name=cg08097657 | feature_id[67].value ><br>threshold=0.3371318429708481    |
| node_190: feature_name=cg07891483 | feature_id[59].value ><br>threshold=0.6211732923984528    |
| node_194: feature_name=cg20122645 | feature_id[275].value ><br>threshold=0.6094755828380585   |
| node_196: feature_name=cg04026354 | feature_id[1763].value <=<br>threshold=0.4341808259487152 |
| node_197: feature_name=cg10149889 | feature_id[1017].value ><br>threshold=0.6150195300579071  |
| node_201: feature_name=cg14890730 | feature_id[337].value <=<br>threshold=0.4372602105140686  |
| node_202: feature_name=cg08331427 | feature_id[132].value ><br>threshold=0.5443233847618103   |
| node_208: feature_name=cg22730007 | feature_id[2544].value ><br>threshold=0.28619489073753357 |
| node_210: feature_name=cg17193551 | feature_id[2057].value ><br>threshold=0.4393353909254074  |
| node_212: feature_name=cg14671764 | feature_id[584].value <=<br>threshold=0.9353199899196625  |
| node_213: feature_name=cg20140662 | feature_id[2044].value ><br>threshold=0.38030287623405457 |
| node_215: feature_name=cg07891483 | feature_id[59].value ><br>threshold=0.829958975315094     |
| node_219: feature_name=cg04884579 | feature_id[1861].value ><br>threshold=0.6106154918670654  |
| node_229: feature_name=cg19548524 | feature_id[2985].value ><br>threshold=0.8623353838920593  |

|                                   |                                                           |
|-----------------------------------|-----------------------------------------------------------|
| node_233: feature_name=cg14788686 | feature_id[3556].value ><br>threshold=0.35090239346027374 |
| node_235: feature_name=cg05380734 | feature_id[2470].value <=<br>threshold=0.7112160623073578 |
| node_236: feature_name=cg01166827 | feature_id[3708].value ><br>threshold=0.6359498500823975  |
| node_238: feature_name=cg13251842 | feature_id[714].value ><br>threshold=0.8916542232036591   |
| node_240: feature_name=cg02829279 | feature_id[623].value ><br>threshold=0.450528159737587    |
| node_242: feature_name=cg24358599 | feature_id[86].value ><br>threshold=0.8132582604885101    |
| node_246: feature_name=cg05544807 | feature_id[3661].value <=<br>threshold=0.6726464331150055 |
| node_247: feature_name=cg05056653 | feature_id[3122].value ><br>threshold=0.35445791482925415 |
| node_249: feature_name=cg26308909 | feature_id[770].value ><br>threshold=0.3754204213619232   |
| node_251: feature_name=cg11197908 | feature_id[3058].value ><br>threshold=0.36795753240585327 |
| node_253: feature_name=cg00039385 | feature_id[646].value <=<br>threshold=0.18521490693092346 |
| node_254: feature_name=cg04787317 | feature_id[3379].value <=<br>threshold=0.8155552744865417 |
| Class: Kaposi sarcoma (KS)        |                                                           |
|                                   |                                                           |
| Rules_96                          | passed counts:2                                           |
| node_0: feature_name=cg11915444   | feature_id[1171].value ><br>threshold=0.3402601182460785  |
| node_10: feature_name=cg12109728  | feature_id[2810].value ><br>threshold=0.7068270146846771  |
| node_20: feature_name=cg16412000  | feature_id[789].value ><br>threshold=0.6741803884506226   |
| node_24: feature_name=cg17115147  | feature_id[1434].value <=<br>threshold=0.2961975038051605 |
| node_25: feature_name=cg24474622  | feature_id[2737].value ><br>threshold=0.7211934924125671  |
| node_29: feature_name=cg10472711  | feature_id[612].value ><br>threshold=0.45985929667949677  |
| node_37: feature_name=cg01937669  | feature_id[188].value <=<br>threshold=0.4809463769197464  |
| node_38: feature_name=cg02157052  | feature_id[451].value <=<br>threshold=0.2869153320789337  |

|                                   |                                                            |
|-----------------------------------|------------------------------------------------------------|
| node_39: feature_name=cg18751958  | feature_id[1427].value ><br>threshold=0.4813787043094635   |
| node_41: feature_name=cg22512847  | feature_id[1152].value ><br>threshold=0.5129324495792389   |
| node_43: feature_name=cg23345038  | feature_id[1147].value ><br>threshold=0.6318148374557495   |
| node_45: feature_name=cg17439009  | feature_id[1815].value <=<br>threshold=0.48514117300510406 |
| node_46: feature_name=cg17537493  | feature_id[2772].value ><br>threshold=0.5825372636318207   |
| node_52: feature_name=cg01683570  | feature_id[110].value ><br>threshold=0.6040188074111938    |
| node_54: feature_name=cg15720017  | feature_id[168].value ><br>threshold=0.7067741453647614    |
| node_60: feature_name=cg23690444  | feature_id[120].value <=<br>threshold=0.16037724912166595  |
| node_61: feature_name=cg00567872  | feature_id[236].value ><br>threshold=0.7005765736103058    |
| node_85: feature_name=cg01014262  | feature_id[764].value <=<br>threshold=0.5737917125225067   |
| node_86: feature_name=cg22946562  | feature_id[1148].value ><br>threshold=0.6328203976154327   |
| node_134: feature_name=cg14514032 | feature_id[202].value <=<br>threshold=0.4389604330062866   |
| node_135: feature_name=cg13488220 | feature_id[241].value ><br>threshold=0.7352153658866882    |
| node_143: feature_name=cg03840920 | feature_id[256].value ><br>threshold=0.502630889415741     |
| node_147: feature_name=cg13634090 | feature_id[822].value ><br>threshold=0.7207068204879761    |
| node_151: feature_name=cg19584674 | feature_id[2364].value <=<br>threshold=0.41758519411087036 |
| node_152: feature_name=cg07344990 | feature_id[411].value ><br>threshold=0.5484964847564697    |
| node_158: feature_name=cg10298992 | feature_id[3066].value ><br>threshold=0.5707973837852478   |
| node_174: feature_name=cg11843516 | feature_id[20].value <=<br>threshold=0.5590928494930267    |
| node_175: feature_name=cg05185926 | feature_id[448].value ><br>threshold=0.17318664491176605   |
| node_177: feature_name=cg17009731 | feature_id[1220].value ><br>threshold=0.6666513085365295   |
| node_179: feature_name=cg01380319 | feature_id[515].value <=<br>threshold=0.39251960813999176  |

|                                   |                                                           |
|-----------------------------------|-----------------------------------------------------------|
| node_180: feature_name=cg20700977 | feature_id[303].value ><br>threshold=0.8422040641307831   |
| node_184: feature_name=cg24259291 | feature_id[164].value ><br>threshold=0.4872268736362457   |
| node_188: feature_name=cg08097657 | feature_id[67].value ><br>threshold=0.3371318429708481    |
| node_190: feature_name=cg07891483 | feature_id[59].value ><br>threshold=0.6211732923984528    |
| node_194: feature_name=cg20122645 | feature_id[275].value ><br>threshold=0.6094755828380585   |
| node_196: feature_name=cg04026354 | feature_id[1763].value <=<br>threshold=0.4341808259487152 |
| node_197: feature_name=cg10149889 | feature_id[1017].value ><br>threshold=0.6150195300579071  |
| node_201: feature_name=cg14890730 | feature_id[337].value <=<br>threshold=0.4372602105140686  |
| node_202: feature_name=cg08331427 | feature_id[132].value ><br>threshold=0.5443233847618103   |
| node_208: feature_name=cg22730007 | feature_id[2544].value ><br>threshold=0.28619489073753357 |
| node_210: feature_name=cg17193551 | feature_id[2057].value ><br>threshold=0.4393353909254074  |
| node_212: feature_name=cg14671764 | feature_id[584].value <=<br>threshold=0.9353199899196625  |
| node_213: feature_name=cg20140662 | feature_id[2044].value ><br>threshold=0.38030287623405457 |
| node_215: feature_name=cg07891483 | feature_id[59].value ><br>threshold=0.829958975315094     |
| node_219: feature_name=cg04884579 | feature_id[1861].value ><br>threshold=0.6106154918670654  |
| node_229: feature_name=cg19548524 | feature_id[2985].value ><br>threshold=0.8623353838920593  |
| node_233: feature_name=cg14788686 | feature_id[3556].value ><br>threshold=0.35090239346027374 |
| node_235: feature_name=cg05380734 | feature_id[2470].value <=<br>threshold=0.7112160623073578 |
| node_236: feature_name=cg01166827 | feature_id[3708].value ><br>threshold=0.6359498500823975  |
| node_238: feature_name=cg13251842 | feature_id[714].value ><br>threshold=0.8916542232036591   |
| node_240: feature_name=cg02829279 | feature_id[623].value ><br>threshold=0.450528159737587    |
| node_242: feature_name=cg24358599 | feature_id[86].value ><br>threshold=0.8132582604885101    |

|                                   |                                                            |
|-----------------------------------|------------------------------------------------------------|
| node_246: feature_name=cg05544807 | feature_id[3661].value <=<br>threshold=0.6726464331150055  |
| node_247: feature_name=cg05056653 | feature_id[3122].value ><br>threshold=0.35445791482925415  |
| node_249: feature_name=cg26308909 | feature_id[770].value ><br>threshold=0.3754204213619232    |
| node_251: feature_name=cg11197908 | feature_id[3058].value <=<br>threshold=0.36795753240585327 |
| Class: rhabdomyosarcoma (RMS)     |                                                            |
|                                   |                                                            |
| Rules_97                          | passed counts:2                                            |
| node_0: feature_name=cg11915444   | feature_id[1171].value ><br>threshold=0.3402601182460785   |
| node_10: feature_name=cg12109728  | feature_id[2810].value ><br>threshold=0.7068270146846771   |
| node_20: feature_name=cg16412000  | feature_id[789].value ><br>threshold=0.6741803884506226    |
| node_24: feature_name=cg17115147  | feature_id[1434].value <=<br>threshold=0.2961975038051605  |
| node_25: feature_name=cg24474622  | feature_id[2737].value ><br>threshold=0.7211934924125671   |
| node_29: feature_name=cg10472711  | feature_id[612].value ><br>threshold=0.45985929667949677   |
| node_37: feature_name=cg01937669  | feature_id[188].value <=<br>threshold=0.4809463769197464   |
| node_38: feature_name=cg02157052  | feature_id[451].value <=<br>threshold=0.2869153320789337   |
| node_39: feature_name=cg18751958  | feature_id[1427].value ><br>threshold=0.4813787043094635   |
| node_41: feature_name=cg22512847  | feature_id[1152].value ><br>threshold=0.5129324495792389   |
| node_43: feature_name=cg23345038  | feature_id[1147].value ><br>threshold=0.6318148374557495   |
| node_45: feature_name=cg17439009  | feature_id[1815].value <=<br>threshold=0.48514117300510406 |
| node_46: feature_name=cg17537493  | feature_id[2772].value ><br>threshold=0.5825372636318207   |
| node_52: feature_name=cg01683570  | feature_id[110].value ><br>threshold=0.6040188074111938    |
| node_54: feature_name=cg15720017  | feature_id[168].value ><br>threshold=0.7067741453647614    |
| node_60: feature_name=cg23690444  | feature_id[120].value <=<br>threshold=0.16037724912166595  |

|                                   |                                                            |
|-----------------------------------|------------------------------------------------------------|
| node_61: feature_name=cg00567872  | feature_id[236].value ><br>threshold=0.7005765736103058    |
| node_85: feature_name=cg01014262  | feature_id[764].value <=<br>threshold=0.5737917125225067   |
| node_86: feature_name=cg22946562  | feature_id[1148].value ><br>threshold=0.6328203976154327   |
| node_134: feature_name=cg14514032 | feature_id[202].value <=<br>threshold=0.4389604330062866   |
| node_135: feature_name=cg13488220 | feature_id[241].value ><br>threshold=0.7352153658866882    |
| node_143: feature_name=cg03840920 | feature_id[256].value ><br>threshold=0.502630889415741     |
| node_147: feature_name=cg13634090 | feature_id[822].value ><br>threshold=0.7207068204879761    |
| node_151: feature_name=cg19584674 | feature_id[2364].value <=<br>threshold=0.41758519411087036 |
| node_152: feature_name=cg07344990 | feature_id[411].value ><br>threshold=0.5484964847564697    |
| node_158: feature_name=cg10298992 | feature_id[3066].value ><br>threshold=0.5707973837852478   |
| node_174: feature_name=cg11843516 | feature_id[20].value <=<br>threshold=0.5590928494930267    |
| node_175: feature_name=cg05185926 | feature_id[448].value ><br>threshold=0.17318664491176605   |
| node_177: feature_name=cg17009731 | feature_id[1220].value ><br>threshold=0.6666513085365295   |
| node_179: feature_name=cg01380319 | feature_id[515].value <=<br>threshold=0.39251960813999176  |
| node_180: feature_name=cg20700977 | feature_id[303].value ><br>threshold=0.8422040641307831    |
| node_184: feature_name=cg24259291 | feature_id[164].value ><br>threshold=0.4872268736362457    |
| node_188: feature_name=cg08097657 | feature_id[67].value ><br>threshold=0.3371318429708481     |
| node_190: feature_name=cg07891483 | feature_id[59].value ><br>threshold=0.6211732923984528     |
| node_194: feature_name=cg20122645 | feature_id[275].value ><br>threshold=0.6094755828380585    |
| node_196: feature_name=cg04026354 | feature_id[1763].value <=<br>threshold=0.4341808259487152  |
| node_197: feature_name=cg10149889 | feature_id[1017].value ><br>threshold=0.6150195300579071   |
| node_201: feature_name=cg14890730 | feature_id[337].value <=<br>threshold=0.4372602105140686   |

|                                                 |                                                           |
|-------------------------------------------------|-----------------------------------------------------------|
| node_202: feature_name=cg08331427               | feature_id[132].value ><br>threshold=0.5443233847618103   |
| node_208: feature_name=cg22730007               | feature_id[2544].value ><br>threshold=0.28619489073753357 |
| node_210: feature_name=cg17193551               | feature_id[2057].value ><br>threshold=0.4393353909254074  |
| node_212: feature_name=cg14671764               | feature_id[584].value <=<br>threshold=0.9353199899196625  |
| node_213: feature_name=cg20140662               | feature_id[2044].value ><br>threshold=0.38030287623405457 |
| node_215: feature_name=cg07891483               | feature_id[59].value ><br>threshold=0.829958975315094     |
| node_219: feature_name=cg04884579               | feature_id[1861].value ><br>threshold=0.6106154918670654  |
| node_229: feature_name=cg19548524               | feature_id[2985].value ><br>threshold=0.8623353838920593  |
| node_233: feature_name=cg14788686               | feature_id[3556].value ><br>threshold=0.35090239346027374 |
| node_235: feature_name=cg05380734               | feature_id[2470].value <=<br>threshold=0.7112160623073578 |
| node_236: feature_name=cg01166827               | feature_id[3708].value ><br>threshold=0.6359498500823975  |
| node_238: feature_name=cg13251842               | feature_id[714].value ><br>threshold=0.8916542232036591   |
| node_240: feature_name=cg02829279               | feature_id[623].value ><br>threshold=0.450528159737587    |
| node_242: feature_name=cg24358599               | feature_id[86].value ><br>threshold=0.8132582604885101    |
| node_246: feature_name=cg05544807               | feature_id[3661].value <=<br>threshold=0.6726464331150055 |
| node_247: feature_name=cg05056653               | feature_id[3122].value ><br>threshold=0.35445791482925415 |
| node_249: feature_name=cg26308909               | feature_id[770].value <=<br>threshold=0.3754204213619232  |
| Class: sclerosing epithelioid fibrosarcoma(SEF) |                                                           |
|                                                 |                                                           |
| Rules_98                                        | passed counts:2                                           |
| node_0: feature_name=cg11915444                 | feature_id[1171].value ><br>threshold=0.3402601182460785  |
| node_10: feature_name=cg12109728                | feature_id[2810].value ><br>threshold=0.7068270146846771  |
| node_20: feature_name=cg16412000                | feature_id[789].value ><br>threshold=0.6741803884506226   |



|                                   |                                                            |
|-----------------------------------|------------------------------------------------------------|
| node_24: feature_name=cg17115147  | feature_id[1434].value <=<br>threshold=0.2961975038051605  |
| node_25: feature_name=cg24474622  | feature_id[2737].value ><br>threshold=0.7211934924125671   |
| node_29: feature_name=cg10472711  | feature_id[612].value ><br>threshold=0.45985929667949677   |
| node_37: feature_name=cg01937669  | feature_id[188].value <=<br>threshold=0.4809463769197464   |
| node_38: feature_name=cg02157052  | feature_id[451].value <=<br>threshold=0.2869153320789337   |
| node_39: feature_name=cg18751958  | feature_id[1427].value ><br>threshold=0.4813787043094635   |
| node_41: feature_name=cg22512847  | feature_id[1152].value ><br>threshold=0.5129324495792389   |
| node_43: feature_name=cg23345038  | feature_id[1147].value ><br>threshold=0.6318148374557495   |
| node_45: feature_name=cg17439009  | feature_id[1815].value <=<br>threshold=0.48514117300510406 |
| node_46: feature_name=cg17537493  | feature_id[2772].value ><br>threshold=0.5825372636318207   |
| node_52: feature_name=cg01683570  | feature_id[110].value ><br>threshold=0.6040188074111938    |
| node_54: feature_name=cg15720017  | feature_id[168].value ><br>threshold=0.7067741453647614    |
| node_60: feature_name=cg23690444  | feature_id[120].value <=<br>threshold=0.16037724912166595  |
| node_61: feature_name=cg00567872  | feature_id[236].value ><br>threshold=0.7005765736103058    |
| node_85: feature_name=cg01014262  | feature_id[764].value <=<br>threshold=0.5737917125225067   |
| node_86: feature_name=cg22946562  | feature_id[1148].value ><br>threshold=0.6328203976154327   |
| node_134: feature_name=cg14514032 | feature_id[202].value <=<br>threshold=0.4389604330062866   |
| node_135: feature_name=cg13488220 | feature_id[241].value ><br>threshold=0.7352153658866882    |
| node_143: feature_name=cg03840920 | feature_id[256].value ><br>threshold=0.502630889415741     |
| node_147: feature_name=cg13634090 | feature_id[822].value ><br>threshold=0.7207068204879761    |
| node_151: feature_name=cg19584674 | feature_id[2364].value <=<br>threshold=0.41758519411087036 |
| node_152: feature_name=cg07344990 | feature_id[411].value ><br>threshold=0.5484964847564697    |

|                                   |                                                           |
|-----------------------------------|-----------------------------------------------------------|
| node_158: feature_name=cg10298992 | feature_id[3066].value ><br>threshold=0.5707973837852478  |
| node_174: feature_name=cg11843516 | feature_id[20].value <=<br>threshold=0.5590928494930267   |
| node_175: feature_name=cg05185926 | feature_id[448].value ><br>threshold=0.17318664491176605  |
| node_177: feature_name=cg17009731 | feature_id[1220].value ><br>threshold=0.6666513085365295  |
| node_179: feature_name=cg01380319 | feature_id[515].value <=<br>threshold=0.39251960813999176 |
| node_180: feature_name=cg20700977 | feature_id[303].value ><br>threshold=0.8422040641307831   |
| node_184: feature_name=cg24259291 | feature_id[164].value ><br>threshold=0.4872268736362457   |
| node_188: feature_name=cg08097657 | feature_id[67].value ><br>threshold=0.3371318429708481    |
| node_190: feature_name=cg07891483 | feature_id[59].value ><br>threshold=0.6211732923984528    |
| node_194: feature_name=cg20122645 | feature_id[275].value ><br>threshold=0.6094755828380585   |
| node_196: feature_name=cg04026354 | feature_id[1763].value <=<br>threshold=0.4341808259487152 |
| node_197: feature_name=cg10149889 | feature_id[1017].value ><br>threshold=0.6150195300579071  |
| node_201: feature_name=cg14890730 | feature_id[337].value <=<br>threshold=0.4372602105140686  |
| node_202: feature_name=cg08331427 | feature_id[132].value ><br>threshold=0.5443233847618103   |
| node_208: feature_name=cg22730007 | feature_id[2544].value ><br>threshold=0.28619489073753357 |
| node_210: feature_name=cg17193551 | feature_id[2057].value ><br>threshold=0.4393353909254074  |
| node_212: feature_name=cg14671764 | feature_id[584].value <=<br>threshold=0.9353199899196625  |
| node_213: feature_name=cg20140662 | feature_id[2044].value ><br>threshold=0.38030287623405457 |
| node_215: feature_name=cg07891483 | feature_id[59].value ><br>threshold=0.829958975315094     |
| node_219: feature_name=cg04884579 | feature_id[1861].value ><br>threshold=0.6106154918670654  |
| node_229: feature_name=cg19548524 | feature_id[2985].value ><br>threshold=0.8623353838920593  |
| node_233: feature_name=cg14788686 | feature_id[3556].value ><br>threshold=0.35090239346027374 |

|                                                         |                                                            |
|---------------------------------------------------------|------------------------------------------------------------|
| node_235: feature_name=cg05380734                       | feature_id[2470].value <=<br>threshold=0.7112160623073578  |
| node_236: feature_name=cg01166827                       | feature_id[3708].value ><br>threshold=0.6359498500823975   |
| node_238: feature_name=cg13251842                       | feature_id[714].value ><br>threshold=0.8916542232036591    |
| node_240: feature_name=cg02829279                       | feature_id[623].value ><br>threshold=0.450528159737587     |
| node_242: feature_name=cg24358599                       | feature_id[86].value ><br>threshold=0.8132582604885101     |
| node_246: feature_name=cg05544807                       | feature_id[3661].value <=<br>threshold=0.6726464331150055  |
| node_247: feature_name=cg05056653                       | feature_id[3122].value <=<br>threshold=0.35445791482925415 |
| Class: malignant peripheral nerve sheath tumour (MPNST) |                                                            |
|                                                         |                                                            |
| Rules_99                                                | passed counts:2                                            |
| node_0: feature_name=cg11915444                         | feature_id[1171].value ><br>threshold=0.3402601182460785   |
| node_10: feature_name=cg12109728                        | feature_id[2810].value ><br>threshold=0.7068270146846771   |
| node_20: feature_name=cg16412000                        | feature_id[789].value ><br>threshold=0.6741803884506226    |
| node_24: feature_name=cg17115147                        | feature_id[1434].value <=<br>threshold=0.2961975038051605  |
| node_25: feature_name=cg24474622                        | feature_id[2737].value ><br>threshold=0.7211934924125671   |
| node_29: feature_name=cg10472711                        | feature_id[612].value ><br>threshold=0.45985929667949677   |
| node_37: feature_name=cg01937669                        | feature_id[188].value <=<br>threshold=0.4809463769197464   |
| node_38: feature_name=cg02157052                        | feature_id[451].value <=<br>threshold=0.2869153320789337   |
| node_39: feature_name=cg18751958                        | feature_id[1427].value ><br>threshold=0.4813787043094635   |
| node_41: feature_name=cg22512847                        | feature_id[1152].value ><br>threshold=0.5129324495792389   |
| node_43: feature_name=cg23345038                        | feature_id[1147].value ><br>threshold=0.6318148374557495   |
| node_45: feature_name=cg17439009                        | feature_id[1815].value <=<br>threshold=0.48514117300510406 |

|                                   |                                                            |
|-----------------------------------|------------------------------------------------------------|
| node_46: feature_name=cg17537493  | feature_id[2772].value ><br>threshold=0.5825372636318207   |
| node_52: feature_name=cg01683570  | feature_id[110].value ><br>threshold=0.6040188074111938    |
| node_54: feature_name=cg15720017  | feature_id[168].value ><br>threshold=0.7067741453647614    |
| node_60: feature_name=cg23690444  | feature_id[120].value <=<br>threshold=0.16037724912166595  |
| node_61: feature_name=cg00567872  | feature_id[236].value ><br>threshold=0.7005765736103058    |
| node_85: feature_name=cg01014262  | feature_id[764].value <=<br>threshold=0.5737917125225067   |
| node_86: feature_name=cg22946562  | feature_id[1148].value ><br>threshold=0.6328203976154327   |
| node_134: feature_name=cg14514032 | feature_id[202].value <=<br>threshold=0.4389604330062866   |
| node_135: feature_name=cg13488220 | feature_id[241].value ><br>threshold=0.7352153658866882    |
| node_143: feature_name=cg03840920 | feature_id[256].value ><br>threshold=0.502630889415741     |
| node_147: feature_name=cg13634090 | feature_id[822].value ><br>threshold=0.7207068204879761    |
| node_151: feature_name=cg19584674 | feature_id[2364].value <=<br>threshold=0.41758519411087036 |
| node_152: feature_name=cg07344990 | feature_id[411].value ><br>threshold=0.5484964847564697    |
| node_158: feature_name=cg10298992 | feature_id[3066].value ><br>threshold=0.5707973837852478   |
| node_174: feature_name=cg11843516 | feature_id[20].value <=<br>threshold=0.5590928494930267    |
| node_175: feature_name=cg05185926 | feature_id[448].value ><br>threshold=0.17318664491176605   |
| node_177: feature_name=cg17009731 | feature_id[1220].value ><br>threshold=0.6666513085365295   |
| node_179: feature_name=cg01380319 | feature_id[515].value <=<br>threshold=0.39251960813999176  |
| node_180: feature_name=cg20700977 | feature_id[303].value ><br>threshold=0.8422040641307831    |
| node_184: feature_name=cg24259291 | feature_id[164].value ><br>threshold=0.4872268736362457    |
| node_188: feature_name=cg08097657 | feature_id[67].value ><br>threshold=0.3371318429708481     |
| node_190: feature_name=cg07891483 | feature_id[59].value ><br>threshold=0.6211732923984528     |

|                                                                                   |                                                           |
|-----------------------------------------------------------------------------------|-----------------------------------------------------------|
| node_194: feature_name=cg20122645                                                 | feature_id[275].value ><br>threshold=0.6094755828380585   |
| node_196: feature_name=cg04026354                                                 | feature_id[1763].value <=<br>threshold=0.4341808259487152 |
| node_197: feature_name=cg10149889                                                 | feature_id[1017].value ><br>threshold=0.6150195300579071  |
| node_201: feature_name=cg14890730                                                 | feature_id[337].value <=<br>threshold=0.4372602105140686  |
| node_202: feature_name=cg08331427                                                 | feature_id[132].value ><br>threshold=0.5443233847618103   |
| node_208: feature_name=cg22730007                                                 | feature_id[2544].value ><br>threshold=0.28619489073753357 |
| node_210: feature_name=cg17193551                                                 | feature_id[2057].value ><br>threshold=0.4393353909254074  |
| node_212: feature_name=cg14671764                                                 | feature_id[584].value <=<br>threshold=0.9353199899196625  |
| node_213: feature_name=cg20140662                                                 | feature_id[2044].value ><br>threshold=0.38030287623405457 |
| node_215: feature_name=cg07891483                                                 | feature_id[59].value ><br>threshold=0.829958975315094     |
| node_219: feature_name=cg04884579                                                 | feature_id[1861].value <=<br>threshold=0.6106154918670654 |
| node_220: feature_name=cg25066857                                                 | feature_id[3759].value <=<br>threshold=0.8149203658103943 |
| node_221: feature_name=cg04813695                                                 | feature_id[1758].value ><br>threshold=0.8937293887138367  |
| node_223: feature_name=cg12895304                                                 | feature_id[5].value ><br>threshold=0.8254048228263855     |
| Class: well differentiated liposarcoma (WDLS)/dedifferentiated liposarcoma (DDLs) |                                                           |
|                                                                                   |                                                           |
| Rules_100                                                                         | passed counts:2                                           |
| node_0: feature_name=cg11915444                                                   | feature_id[1171].value ><br>threshold=0.3402601182460785  |
| node_10: feature_name=cg12109728                                                  | feature_id[2810].value ><br>threshold=0.7068270146846771  |
| node_20: feature_name=cg16412000                                                  | feature_id[789].value ><br>threshold=0.6741803884506226   |
| node_24: feature_name=cg17115147                                                  | feature_id[1434].value <=<br>threshold=0.2961975038051605 |
| node_25: feature_name=cg24474622                                                  | feature_id[2737].value ><br>threshold=0.7211934924125671  |

|                                   |                                                            |
|-----------------------------------|------------------------------------------------------------|
| node_29: feature_name=cg10472711  | feature_id[612].value ><br>threshold=0.45985929667949677   |
| node_37: feature_name=cg01937669  | feature_id[188].value <=<br>threshold=0.4809463769197464   |
| node_38: feature_name=cg02157052  | feature_id[451].value <=<br>threshold=0.2869153320789337   |
| node_39: feature_name=cg18751958  | feature_id[1427].value ><br>threshold=0.4813787043094635   |
| node_41: feature_name=cg22512847  | feature_id[1152].value ><br>threshold=0.5129324495792389   |
| node_43: feature_name=cg23345038  | feature_id[1147].value ><br>threshold=0.6318148374557495   |
| node_45: feature_name=cg17439009  | feature_id[1815].value <=<br>threshold=0.48514117300510406 |
| node_46: feature_name=cg17537493  | feature_id[2772].value ><br>threshold=0.5825372636318207   |
| node_52: feature_name=cg01683570  | feature_id[110].value ><br>threshold=0.6040188074111938    |
| node_54: feature_name=cg15720017  | feature_id[168].value ><br>threshold=0.7067741453647614    |
| node_60: feature_name=cg23690444  | feature_id[120].value <=<br>threshold=0.16037724912166595  |
| node_61: feature_name=cg00567872  | feature_id[236].value ><br>threshold=0.7005765736103058    |
| node_85: feature_name=cg01014262  | feature_id[764].value <=<br>threshold=0.5737917125225067   |
| node_86: feature_name=cg22946562  | feature_id[1148].value ><br>threshold=0.6328203976154327   |
| node_134: feature_name=cg14514032 | feature_id[202].value <=<br>threshold=0.4389604330062866   |
| node_135: feature_name=cg13488220 | feature_id[241].value ><br>threshold=0.7352153658866882    |
| node_143: feature_name=cg03840920 | feature_id[256].value ><br>threshold=0.502630889415741     |
| node_147: feature_name=cg13634090 | feature_id[822].value ><br>threshold=0.7207068204879761    |
| node_151: feature_name=cg19584674 | feature_id[2364].value <=<br>threshold=0.41758519411087036 |
| node_152: feature_name=cg07344990 | feature_id[411].value ><br>threshold=0.5484964847564697    |
| node_158: feature_name=cg10298992 | feature_id[3066].value <=<br>threshold=0.5707973837852478  |
| node_159: feature_name=cg24852135 | feature_id[47].value <=<br>threshold=0.8445721566677094    |

|                                   |                                                            |
|-----------------------------------|------------------------------------------------------------|
| node_160: feature_name=cg25606046 | feature_id[2007].value <=<br>threshold=0.8722946643829346  |
| node_161: feature_name=cg03212620 | feature_id[1188].value ><br>threshold=0.4703744798898697   |
| node_163: feature_name=cg27096087 | feature_id[2512].value <=<br>threshold=0.8232799470424652  |
| Class: chondroblastoma (CB)       |                                                            |
| Rules_101                         | passed counts:2                                            |
| node_0: feature_name=cg11915444   | feature_id[1171].value ><br>threshold=0.3402601182460785   |
| node_10: feature_name=cg12109728  | feature_id[2810].value ><br>threshold=0.7068270146846771   |
| node_20: feature_name=cg16412000  | feature_id[789].value ><br>threshold=0.6741803884506226    |
| node_24: feature_name=cg17115147  | feature_id[1434].value <=<br>threshold=0.2961975038051605  |
| node_25: feature_name=cg24474622  | feature_id[2737].value ><br>threshold=0.7211934924125671   |
| node_29: feature_name=cg10472711  | feature_id[612].value ><br>threshold=0.45985929667949677   |
| node_37: feature_name=cg01937669  | feature_id[188].value <=<br>threshold=0.4809463769197464   |
| node_38: feature_name=cg02157052  | feature_id[451].value <=<br>threshold=0.2869153320789337   |
| node_39: feature_name=cg18751958  | feature_id[1427].value ><br>threshold=0.4813787043094635   |
| node_41: feature_name=cg22512847  | feature_id[1152].value ><br>threshold=0.5129324495792389   |
| node_43: feature_name=cg23345038  | feature_id[1147].value ><br>threshold=0.6318148374557495   |
| node_45: feature_name=cg17439009  | feature_id[1815].value <=<br>threshold=0.48514117300510406 |
| node_46: feature_name=cg17537493  | feature_id[2772].value ><br>threshold=0.5825372636318207   |
| node_52: feature_name=cg01683570  | feature_id[110].value ><br>threshold=0.6040188074111938    |
| node_54: feature_name=cg15720017  | feature_id[168].value ><br>threshold=0.7067741453647614    |
| node_60: feature_name=cg23690444  | feature_id[120].value <=<br>threshold=0.16037724912166595  |
| node_61: feature_name=cg00567872  | feature_id[236].value ><br>threshold=0.7005765736103058    |

|                                   |                                                            |
|-----------------------------------|------------------------------------------------------------|
| node_85: feature_name=cg01014262  | feature_id[764].value <=<br>threshold=0.5737917125225067   |
| node_86: feature_name=cg22946562  | feature_id[1148].value ><br>threshold=0.6328203976154327   |
| node_134: feature_name=cg14514032 | feature_id[202].value <=<br>threshold=0.4389604330062866   |
| node_135: feature_name=cg13488220 | feature_id[241].value ><br>threshold=0.7352153658866882    |
| node_143: feature_name=cg03840920 | feature_id[256].value ><br>threshold=0.502630889415741     |
| node_147: feature_name=cg13634090 | feature_id[822].value ><br>threshold=0.7207068204879761    |
| node_151: feature_name=cg19584674 | feature_id[2364].value <=<br>threshold=0.41758519411087036 |
| node_152: feature_name=cg07344990 | feature_id[411].value ><br>threshold=0.5484964847564697    |
| node_158: feature_name=cg10298992 | feature_id[3066].value <=<br>threshold=0.5707973837852478  |
| node_159: feature_name=cg24852135 | feature_id[47].value <=<br>threshold=0.8445721566677094    |
| node_160: feature_name=cg25606046 | feature_id[2007].value <=<br>threshold=0.8722946643829346  |
| node_161: feature_name=cg03212620 | feature_id[1188].value <=<br>threshold=0.4703744798898697  |
| Class: sarcoma (SARC)             |                                                            |
|                                   |                                                            |
| Rules_102                         | passed counts:2                                            |
| node_0: feature_name=cg11915444   | feature_id[1171].value ><br>threshold=0.3402601182460785   |
| node_10: feature_name=cg12109728  | feature_id[2810].value ><br>threshold=0.7068270146846771   |
| node_20: feature_name=cg16412000  | feature_id[789].value ><br>threshold=0.6741803884506226    |
| node_24: feature_name=cg17115147  | feature_id[1434].value <=<br>threshold=0.2961975038051605  |
| node_25: feature_name=cg24474622  | feature_id[2737].value ><br>threshold=0.7211934924125671   |
| node_29: feature_name=cg10472711  | feature_id[612].value ><br>threshold=0.45985929667949677   |
| node_37: feature_name=cg01937669  | feature_id[188].value <=<br>threshold=0.4809463769197464   |
| node_38: feature_name=cg02157052  | feature_id[451].value <=<br>threshold=0.2869153320789337   |



|                                               |                                                            |
|-----------------------------------------------|------------------------------------------------------------|
| node_39: feature_name=cg18751958              | feature_id[1427].value ><br>threshold=0.4813787043094635   |
| node_41: feature_name=cg22512847              | feature_id[1152].value ><br>threshold=0.5129324495792389   |
| node_43: feature_name=cg23345038              | feature_id[1147].value ><br>threshold=0.6318148374557495   |
| node_45: feature_name=cg17439009              | feature_id[1815].value <=<br>threshold=0.48514117300510406 |
| node_46: feature_name=cg17537493              | feature_id[2772].value ><br>threshold=0.5825372636318207   |
| node_52: feature_name=cg01683570              | feature_id[110].value ><br>threshold=0.6040188074111938    |
| node_54: feature_name=cg15720017              | feature_id[168].value ><br>threshold=0.7067741453647614    |
| node_60: feature_name=cg23690444              | feature_id[120].value <=<br>threshold=0.16037724912166595  |
| node_61: feature_name=cg00567872              | feature_id[236].value ><br>threshold=0.7005765736103058    |
| node_85: feature_name=cg01014262              | feature_id[764].value <=<br>threshold=0.5737917125225067   |
| node_86: feature_name=cg22946562              | feature_id[1148].value ><br>threshold=0.6328203976154327   |
| node_134: feature_name=cg14514032             | feature_id[202].value <=<br>threshold=0.4389604330062866   |
| node_135: feature_name=cg13488220             | feature_id[241].value ><br>threshold=0.7352153658866882    |
| node_143: feature_name=cg03840920             | feature_id[256].value ><br>threshold=0.502630889415741     |
| node_147: feature_name=cg13634090             | feature_id[822].value ><br>threshold=0.7207068204879761    |
| node_151: feature_name=cg19584674             | feature_id[2364].value <=<br>threshold=0.41758519411087036 |
| node_152: feature_name=cg07344990             | feature_id[411].value <=<br>threshold=0.5484964847564697   |
| node_153: feature_name=cg18369990             | feature_id[2197].value <=<br>threshold=0.621816486120224   |
| node_154: feature_name=cg14560240             | feature_id[2397].value ><br>threshold=0.538348525762558    |
| Class: mesenchymal chondrosarcoma (CSA (MES)) |                                                            |
| Rules_103                                     | passed counts:2                                            |

|                                   |                                                            |
|-----------------------------------|------------------------------------------------------------|
| node_0: feature_name=cg11915444   | feature_id[1171].value ><br>threshold=0.3402601182460785   |
| node_10: feature_name=cg12109728  | feature_id[2810].value ><br>threshold=0.7068270146846771   |
| node_20: feature_name=cg16412000  | feature_id[789].value ><br>threshold=0.6741803884506226    |
| node_24: feature_name=cg17115147  | feature_id[1434].value <=<br>threshold=0.2961975038051605  |
| node_25: feature_name=cg24474622  | feature_id[2737].value ><br>threshold=0.7211934924125671   |
| node_29: feature_name=cg10472711  | feature_id[612].value ><br>threshold=0.45985929667949677   |
| node_37: feature_name=cg01937669  | feature_id[188].value <=<br>threshold=0.4809463769197464   |
| node_38: feature_name=cg02157052  | feature_id[451].value <=<br>threshold=0.2869153320789337   |
| node_39: feature_name=cg18751958  | feature_id[1427].value ><br>threshold=0.4813787043094635   |
| node_41: feature_name=cg22512847  | feature_id[1152].value ><br>threshold=0.5129324495792389   |
| node_43: feature_name=cg23345038  | feature_id[1147].value ><br>threshold=0.6318148374557495   |
| node_45: feature_name=cg17439009  | feature_id[1815].value <=<br>threshold=0.48514117300510406 |
| node_46: feature_name=cg17537493  | feature_id[2772].value ><br>threshold=0.5825372636318207   |
| node_52: feature_name=cg01683570  | feature_id[110].value ><br>threshold=0.6040188074111938    |
| node_54: feature_name=cg15720017  | feature_id[168].value ><br>threshold=0.7067741453647614    |
| node_60: feature_name=cg23690444  | feature_id[120].value <=<br>threshold=0.16037724912166595  |
| node_61: feature_name=cg00567872  | feature_id[236].value ><br>threshold=0.7005765736103058    |
| node_85: feature_name=cg01014262  | feature_id[764].value <=<br>threshold=0.5737917125225067   |
| node_86: feature_name=cg22946562  | feature_id[1148].value <=<br>threshold=0.6328203976154327  |
| node_87: feature_name=cg18120975  | feature_id[2767].value ><br>threshold=0.7081544995307922   |
| node_91: feature_name=cg17171539  | feature_id[25].value ><br>threshold=0.501024603843689      |
| node_111: feature_name=cg21241424 | feature_id[1155].value <=<br>threshold=0.7665272355079651  |

|                                                         |                                                            |
|---------------------------------------------------------|------------------------------------------------------------|
| node_112: feature_name=cg21897315                       | feature_id[3800].value ><br>threshold=0.48165470361709595  |
| node_114: feature_name=cg04375492                       | feature_id[2874].value ><br>threshold=0.7812598049640656   |
| node_116: feature_name=cg09892984                       | feature_id[3615].value ><br>threshold=0.6039115190505981   |
| node_118: feature_name=cg05076082                       | feature_id[215].value ><br>threshold=0.7612724006175995    |
| node_120: feature_name=cg15776300                       | feature_id[3872].value <=<br>threshold=0.922246515750885   |
| node_121: feature_name=cg12109728                       | feature_id[2810].value <=<br>threshold=0.8809287846088409  |
| Class: malignant peripheral nerve sheath tumour (MPNST) |                                                            |
|                                                         |                                                            |
| Rules_104                                               | passed counts:2                                            |
| node_0: feature_name=cg11915444                         | feature_id[1171].value ><br>threshold=0.3402601182460785   |
| node_10: feature_name=cg12109728                        | feature_id[2810].value ><br>threshold=0.7068270146846771   |
| node_20: feature_name=cg16412000                        | feature_id[789].value ><br>threshold=0.6741803884506226    |
| node_24: feature_name=cg17115147                        | feature_id[1434].value <=<br>threshold=0.2961975038051605  |
| node_25: feature_name=cg24474622                        | feature_id[2737].value ><br>threshold=0.7211934924125671   |
| node_29: feature_name=cg10472711                        | feature_id[612].value ><br>threshold=0.45985929667949677   |
| node_37: feature_name=cg01937669                        | feature_id[188].value <=<br>threshold=0.4809463769197464   |
| node_38: feature_name=cg02157052                        | feature_id[451].value <=<br>threshold=0.2869153320789337   |
| node_39: feature_name=cg18751958                        | feature_id[1427].value ><br>threshold=0.4813787043094635   |
| node_41: feature_name=cg22512847                        | feature_id[1152].value ><br>threshold=0.5129324495792389   |
| node_43: feature_name=cg23345038                        | feature_id[1147].value ><br>threshold=0.6318148374557495   |
| node_45: feature_name=cg17439009                        | feature_id[1815].value <=<br>threshold=0.48514117300510406 |
| node_46: feature_name=cg17537493                        | feature_id[2772].value ><br>threshold=0.5825372636318207   |

|                                   |                                                           |
|-----------------------------------|-----------------------------------------------------------|
| node_52: feature_name=cg01683570  | feature_id[110].value ><br>threshold=0.6040188074111938   |
| node_54: feature_name=cg15720017  | feature_id[168].value ><br>threshold=0.7067741453647614   |
| node_60: feature_name=cg23690444  | feature_id[120].value <=<br>threshold=0.16037724912166595 |
| node_61: feature_name=cg00567872  | feature_id[236].value ><br>threshold=0.7005765736103058   |
| node_85: feature_name=cg01014262  | feature_id[764].value <=<br>threshold=0.5737917125225067  |
| node_86: feature_name=cg22946562  | feature_id[1148].value <=<br>threshold=0.6328203976154327 |
| node_87: feature_name=cg18120975  | feature_id[2767].value ><br>threshold=0.7081544995307922  |
| node_91: feature_name=cg17171539  | feature_id[25].value <=<br>threshold=0.501024603843689    |
| node_92: feature_name=cg00007036  | feature_id[1586].value ><br>threshold=0.943472146987915   |
| node_104: feature_name=cg14156441 | feature_id[3273].value ><br>threshold=0.24960360676050186 |
| Class: epithelioid sarcoma (ES)   |                                                           |
|                                   |                                                           |
| Rules_105                         | passed counts:2                                           |
| node_0: feature_name=cg11915444   | feature_id[1171].value ><br>threshold=0.3402601182460785  |
| node_10: feature_name=cg12109728  | feature_id[2810].value ><br>threshold=0.7068270146846771  |
| node_20: feature_name=cg16412000  | feature_id[789].value ><br>threshold=0.6741803884506226   |
| node_24: feature_name=cg17115147  | feature_id[1434].value <=<br>threshold=0.2961975038051605 |
| node_25: feature_name=cg24474622  | feature_id[2737].value ><br>threshold=0.7211934924125671  |
| node_29: feature_name=cg10472711  | feature_id[612].value ><br>threshold=0.45985929667949677  |
| node_37: feature_name=cg01937669  | feature_id[188].value <=<br>threshold=0.4809463769197464  |
| node_38: feature_name=cg02157052  | feature_id[451].value <=<br>threshold=0.2869153320789337  |
| node_39: feature_name=cg18751958  | feature_id[1427].value ><br>threshold=0.4813787043094635  |
| node_41: feature_name=cg22512847  | feature_id[1152].value ><br>threshold=0.5129324495792389  |

|                                  |                                                            |
|----------------------------------|------------------------------------------------------------|
| node_43: feature_name=cg23345038 | feature_id[1147].value ><br>threshold=0.6318148374557495   |
| node_45: feature_name=cg17439009 | feature_id[1815].value <=<br>threshold=0.48514117300510406 |
| node_46: feature_name=cg17537493 | feature_id[2772].value ><br>threshold=0.5825372636318207   |
| node_52: feature_name=cg01683570 | feature_id[110].value ><br>threshold=0.6040188074111938    |
| node_54: feature_name=cg15720017 | feature_id[168].value ><br>threshold=0.7067741453647614    |
| node_60: feature_name=cg23690444 | feature_id[120].value <=<br>threshold=0.16037724912166595  |
| node_61: feature_name=cg00567872 | feature_id[236].value ><br>threshold=0.7005765736103058    |
| node_85: feature_name=cg01014262 | feature_id[764].value <=<br>threshold=0.5737917125225067   |
| node_86: feature_name=cg22946562 | feature_id[1148].value <=<br>threshold=0.6328203976154327  |
| node_87: feature_name=cg18120975 | feature_id[2767].value ><br>threshold=0.7081544995307922   |
| node_91: feature_name=cg17171539 | feature_id[25].value <=<br>threshold=0.501024603843689     |
| node_92: feature_name=cg00007036 | feature_id[1586].value <=<br>threshold=0.943472146987915   |
| node_93: feature_name=cg16570314 | feature_id[479].value <=<br>threshold=0.7333994507789612   |
| node_94: feature_name=cg15117891 | feature_id[2220].value ><br>threshold=0.9664478302001953   |
| Class: leiomyosarcoma (LMS)      |                                                            |
|                                  |                                                            |
| Rules_106                        | passed counts:2                                            |
| node_0: feature_name=cg11915444  | feature_id[1171].value ><br>threshold=0.3402601182460785   |
| node_10: feature_name=cg12109728 | feature_id[2810].value ><br>threshold=0.7068270146846771   |
| node_20: feature_name=cg16412000 | feature_id[789].value ><br>threshold=0.6741803884506226    |
| node_24: feature_name=cg17115147 | feature_id[1434].value <=<br>threshold=0.2961975038051605  |
| node_25: feature_name=cg24474622 | feature_id[2737].value ><br>threshold=0.7211934924125671   |
| node_29: feature_name=cg10472711 | feature_id[612].value ><br>threshold=0.45985929667949677   |

|                                                      |                                                            |
|------------------------------------------------------|------------------------------------------------------------|
| node_37: feature_name=cg01937669                     | feature_id[188].value <=<br>threshold=0.4809463769197464   |
| node_38: feature_name=cg02157052                     | feature_id[451].value <=<br>threshold=0.2869153320789337   |
| node_39: feature_name=cg18751958                     | feature_id[1427].value ><br>threshold=0.4813787043094635   |
| node_41: feature_name=cg22512847                     | feature_id[1152].value ><br>threshold=0.5129324495792389   |
| node_43: feature_name=cg23345038                     | feature_id[1147].value ><br>threshold=0.6318148374557495   |
| node_45: feature_name=cg17439009                     | feature_id[1815].value <=<br>threshold=0.48514117300510406 |
| node_46: feature_name=cg17537493                     | feature_id[2772].value ><br>threshold=0.5825372636318207   |
| node_52: feature_name=cg01683570                     | feature_id[110].value ><br>threshold=0.6040188074111938    |
| node_54: feature_name=cg15720017                     | feature_id[168].value ><br>threshold=0.7067741453647614    |
| node_60: feature_name=cg23690444                     | feature_id[120].value <=<br>threshold=0.16037724912166595  |
| node_61: feature_name=cg00567872                     | feature_id[236].value ><br>threshold=0.7005765736103058    |
| node_85: feature_name=cg01014262                     | feature_id[764].value <=<br>threshold=0.5737917125225067   |
| node_86: feature_name=cg22946562                     | feature_id[1148].value <=<br>threshold=0.6328203976154327  |
| node_87: feature_name=cg18120975                     | feature_id[2767].value ><br>threshold=0.7081544995307922   |
| node_91: feature_name=cg17171539                     | feature_id[25].value <=<br>threshold=0.501024603843689     |
| node_92: feature_name=cg00007036                     | feature_id[1586].value <=<br>threshold=0.943472146987915   |
| node_93: feature_name=cg16570314                     | feature_id[479].value <=<br>threshold=0.7333994507789612   |
| node_94: feature_name=cg15117891                     | feature_id[2220].value <=<br>threshold=0.9664478302001953  |
| node_95: feature_name=cg00967711                     | feature_id[414].value <=<br>threshold=0.22273091971874237  |
| Class: cutaneous squamous cell carcinoma (SCC (CUT)) |                                                            |
| Rules_107                                            | passed counts:2                                            |

|                                              |                                                           |
|----------------------------------------------|-----------------------------------------------------------|
| node_0: feature_name=cg11915444              | feature_id[1171].value ><br>threshold=0.3402601182460785  |
| node_10: feature_name=cg12109728             | feature_id[2810].value ><br>threshold=0.7068270146846771  |
| node_20: feature_name=cg16412000             | feature_id[789].value ><br>threshold=0.6741803884506226   |
| node_24: feature_name=cg17115147             | feature_id[1434].value <=<br>threshold=0.2961975038051605 |
| node_25: feature_name=cg24474622             | feature_id[2737].value ><br>threshold=0.7211934924125671  |
| node_29: feature_name=cg10472711             | feature_id[612].value <=<br>threshold=0.45985929667949677 |
| node_30: feature_name=cg06132803             | feature_id[3655].value <=<br>threshold=0.420499712228775  |
| node_31: feature_name=cg04248332             | feature_id[3387].value ><br>threshold=0.6364206075668335  |
| Class: leiomyosarcoma (LMS)                  |                                                           |
|                                              |                                                           |
| Rules_108                                    | passed counts:2                                           |
| node_0: feature_name=cg11915444              | feature_id[1171].value ><br>threshold=0.3402601182460785  |
| node_10: feature_name=cg12109728             | feature_id[2810].value <=<br>threshold=0.7068270146846771 |
| node_11: feature_name=cg23902076             | feature_id[1902].value ><br>threshold=0.8691235482692719  |
| node_13: feature_name=cg17174566             | feature_id[2578].value ><br>threshold=0.8555663526058197  |
| Class: synovial sarcoma (SYSA)               |                                                           |
|                                              |                                                           |
| Rules_109                                    | passed counts:2                                           |
| node_0: feature_name=cg11915444              | feature_id[1171].value <=<br>threshold=0.3402601182460785 |
| node_1: feature_name=cg00204976              | feature_id[3433].value ><br>threshold=0.7535275816917419  |
| node_3: feature_name=cg22663660              | feature_id[38].value <=<br>threshold=0.5185286104679108   |
| Class: alveolar rhabdomyosarcoma (RMS (ALV)) |                                                           |
|                                              |                                                           |
| Rules_110                                    | passed counts:1                                           |
| node_0: feature_name=cg11915444              | feature_id[1171].value ><br>threshold=0.3402601182460785  |

|                                         |                                                           |
|-----------------------------------------|-----------------------------------------------------------|
| node_10: feature_name=cg12109728        | feature_id[2810].value ><br>threshold=0.7068270146846771  |
| node_20: feature_name=cg16412000        | feature_id[789].value ><br>threshold=0.6741803884506226   |
| node_24: feature_name=cg17115147        | feature_id[1434].value ><br>threshold=0.2961975038051605  |
| node_368: feature_name=cg27543578       | feature_id[878].value ><br>threshold=0.8884280920028687   |
| node_372: feature_name=cg11400707       | feature_id[1940].value <=<br>threshold=0.6575311124324799 |
| node_373: feature_name=cg03042971       | feature_id[1579].value ><br>threshold=0.6336731016635895  |
| node_375: feature_name=cg26207909       | feature_id[3746].value ><br>threshold=0.9737023711204529  |
| Class: undifferentiated sarcoma (USARC) |                                                           |
|                                         |                                                           |
| Rules_111                               | passed counts:1                                           |
| node_0: feature_name=cg11915444         | feature_id[1171].value ><br>threshold=0.3402601182460785  |
| node_10: feature_name=cg12109728        | feature_id[2810].value ><br>threshold=0.7068270146846771  |
| node_20: feature_name=cg16412000        | feature_id[789].value ><br>threshold=0.6741803884506226   |
| node_24: feature_name=cg17115147        | feature_id[1434].value ><br>threshold=0.2961975038051605  |
| node_368: feature_name=cg27543578       | feature_id[878].value ><br>threshold=0.8884280920028687   |
| node_372: feature_name=cg11400707       | feature_id[1940].value <=<br>threshold=0.6575311124324799 |
| node_373: feature_name=cg03042971       | feature_id[1579].value ><br>threshold=0.6336731016635895  |
| node_375: feature_name=cg26207909       | feature_id[3746].value <=<br>threshold=0.9737023711204529 |
| Class: chondrosarcoma (CSA)             |                                                           |
|                                         |                                                           |
| Rules_112                               | passed counts:1                                           |
| node_0: feature_name=cg11915444         | feature_id[1171].value ><br>threshold=0.3402601182460785  |
| node_10: feature_name=cg12109728        | feature_id[2810].value ><br>threshold=0.7068270146846771  |
| node_20: feature_name=cg16412000        | feature_id[789].value ><br>threshold=0.6741803884506226   |



|                                         |                                                           |
|-----------------------------------------|-----------------------------------------------------------|
| node_24: feature_name=cg17115147        | feature_id[1434].value ><br>threshold=0.2961975038051605  |
| node_368: feature_name=cg27543578       | feature_id[878].value <=<br>threshold=0.8884280920028687  |
| node_369: feature_name=cg00133595       | feature_id[2504].value ><br>threshold=0.6530520617961884  |
| Class: epithelioid sarcoma (ES)         |                                                           |
| Rules_113                               | passed counts:1                                           |
| node_0: feature_name=cg11915444         | feature_id[1171].value ><br>threshold=0.3402601182460785  |
| node_10: feature_name=cg12109728        | feature_id[2810].value ><br>threshold=0.7068270146846771  |
| node_20: feature_name=cg16412000        | feature_id[789].value ><br>threshold=0.6741803884506226   |
| node_24: feature_name=cg17115147        | feature_id[1434].value <=<br>threshold=0.2961975038051605 |
| node_25: feature_name=cg24474622        | feature_id[2737].value ><br>threshold=0.7211934924125671  |
| node_29: feature_name=cg10472711        | feature_id[612].value ><br>threshold=0.45985929667949677  |
| node_37: feature_name=cg01937669        | feature_id[188].value ><br>threshold=0.4809463769197464   |
| node_363: feature_name=cg14588828       | feature_id[2222].value <=<br>threshold=0.9071650803089142 |
| node_364: feature_name=cg24881558       | feature_id[3465].value ><br>threshold=0.7283148765563965  |
| Class: giant cell tumour of bone (GCTB) |                                                           |
| Rules_114                               | passed counts:1                                           |
| node_0: feature_name=cg11915444         | feature_id[1171].value ><br>threshold=0.3402601182460785  |
| node_10: feature_name=cg12109728        | feature_id[2810].value ><br>threshold=0.7068270146846771  |
| node_20: feature_name=cg16412000        | feature_id[789].value ><br>threshold=0.6741803884506226   |
| node_24: feature_name=cg17115147        | feature_id[1434].value <=<br>threshold=0.2961975038051605 |
| node_25: feature_name=cg24474622        | feature_id[2737].value ><br>threshold=0.7211934924125671  |
| node_29: feature_name=cg10472711        | feature_id[612].value ><br>threshold=0.45985929667949677  |

|                                   |                                                           |
|-----------------------------------|-----------------------------------------------------------|
| node_37: feature_name=cg01937669  | feature_id[188].value <=<br>threshold=0.4809463769197464  |
| node_38: feature_name=cg02157052  | feature_id[451].value ><br>threshold=0.2869153320789337   |
| node_344: feature_name=cg21189849 | feature_id[189].value ><br>threshold=0.7746135592460632   |
| node_348: feature_name=cg06937205 | feature_id[751].value ><br>threshold=0.4331420361995697   |
| node_350: feature_name=cg20165037 | feature_id[2558].value ><br>threshold=0.8168091177940369  |
| node_352: feature_name=cg17454920 | feature_id[3003].value ><br>threshold=0.5224908739328384  |
| node_354: feature_name=cg25878830 | feature_id[1496].value ><br>threshold=0.4498005360364914  |
| node_356: feature_name=cg26070874 | feature_id[1040].value <=<br>threshold=0.8498157262802124 |
| node_357: feature_name=cg19730379 | feature_id[3228].value ><br>threshold=0.3024083226919174  |
| node_359: feature_name=cg09647352 | feature_id[2824].value ><br>threshold=0.8696425259113312  |
| Class: melanoma (MEL)             |                                                           |
|                                   |                                                           |
| Rules_115                         | passed counts:1                                           |
| node_0: feature_name=cg11915444   | feature_id[1171].value ><br>threshold=0.3402601182460785  |
| node_10: feature_name=cg12109728  | feature_id[2810].value ><br>threshold=0.7068270146846771  |
| node_20: feature_name=cg16412000  | feature_id[789].value ><br>threshold=0.6741803884506226   |
| node_24: feature_name=cg17115147  | feature_id[1434].value <=<br>threshold=0.2961975038051605 |
| node_25: feature_name=cg24474622  | feature_id[2737].value ><br>threshold=0.7211934924125671  |
| node_29: feature_name=cg10472711  | feature_id[612].value ><br>threshold=0.45985929667949677  |
| node_37: feature_name=cg01937669  | feature_id[188].value <=<br>threshold=0.4809463769197464  |
| node_38: feature_name=cg02157052  | feature_id[451].value ><br>threshold=0.2869153320789337   |
| node_344: feature_name=cg21189849 | feature_id[189].value ><br>threshold=0.7746135592460632   |
| node_348: feature_name=cg06937205 | feature_id[751].value ><br>threshold=0.4331420361995697   |

|                                                         |                                                           |
|---------------------------------------------------------|-----------------------------------------------------------|
| node_350: feature_name=cg20165037                       | feature_id[2558].value ><br>threshold=0.8168091177940369  |
| node_352: feature_name=cg17454920                       | feature_id[3003].value ><br>threshold=0.5224908739328384  |
| node_354: feature_name=cg25878830                       | feature_id[1496].value ><br>threshold=0.4498005360364914  |
| node_356: feature_name=cg26070874                       | feature_id[1040].value <=<br>threshold=0.8498157262802124 |
| node_357: feature_name=cg19730379                       | feature_id[3228].value ><br>threshold=0.3024083226919174  |
| node_359: feature_name=cg09647352                       | feature_id[2824].value <=<br>threshold=0.8696425259113312 |
| Class: malignant peripheral nerve sheath tumour (MPNST) |                                                           |
|                                                         |                                                           |
| Rules_116                                               | passed counts:1                                           |
| node_0: feature_name=cg11915444                         | feature_id[1171].value ><br>threshold=0.3402601182460785  |
| node_10: feature_name=cg12109728                        | feature_id[2810].value ><br>threshold=0.7068270146846771  |
| node_20: feature_name=cg16412000                        | feature_id[789].value ><br>threshold=0.6741803884506226   |
| node_24: feature_name=cg17115147                        | feature_id[1434].value <=<br>threshold=0.2961975038051605 |
| node_25: feature_name=cg24474622                        | feature_id[2737].value ><br>threshold=0.7211934924125671  |
| node_29: feature_name=cg10472711                        | feature_id[612].value ><br>threshold=0.45985929667949677  |
| node_37: feature_name=cg01937669                        | feature_id[188].value <=<br>threshold=0.4809463769197464  |
| node_38: feature_name=cg02157052                        | feature_id[451].value ><br>threshold=0.2869153320789337   |
| node_344: feature_name=cg21189849                       | feature_id[189].value <=<br>threshold=0.7746135592460632  |
| node_345: feature_name=cg00680875                       | feature_id[833].value <=<br>threshold=0.352913498878479   |
| Class: clear cell chondrosarcoma (CSA (CC))             |                                                           |
|                                                         |                                                           |
| Rules_117                                               | passed counts:1                                           |
| node_0: feature_name=cg11915444                         | feature_id[1171].value ><br>threshold=0.3402601182460785  |
| node_10: feature_name=cg12109728                        | feature_id[2810].value ><br>threshold=0.7068270146846771  |

|                                                         |                                                           |
|---------------------------------------------------------|-----------------------------------------------------------|
| node_20: feature_name=cg16412000                        | feature_id[789].value ><br>threshold=0.6741803884506226   |
| node_24: feature_name=cg17115147                        | feature_id[1434].value <=<br>threshold=0.2961975038051605 |
| node_25: feature_name=cg24474622                        | feature_id[2737].value ><br>threshold=0.7211934924125671  |
| node_29: feature_name=cg10472711                        | feature_id[612].value ><br>threshold=0.45985929667949677  |
| node_37: feature_name=cg01937669                        | feature_id[188].value <=<br>threshold=0.4809463769197464  |
| node_38: feature_name=cg02157052                        | feature_id[451].value <=<br>threshold=0.2869153320789337  |
| node_39: feature_name=cg18751958                        | feature_id[1427].value ><br>threshold=0.4813787043094635  |
| node_41: feature_name=cg22512847                        | feature_id[1152].value ><br>threshold=0.5129324495792389  |
| node_43: feature_name=cg23345038                        | feature_id[1147].value ><br>threshold=0.6318148374557495  |
| node_45: feature_name=cg17439009                        | feature_id[1815].value ><br>threshold=0.48514117300510406 |
| node_337: feature_name=cg14005246                       | feature_id[69].value <=<br>threshold=0.4851873368024826   |
| node_338: feature_name=cg23181573                       | feature_id[3479].value ><br>threshold=0.5930750370025635  |
| node_340: feature_name=cg08775793                       | feature_id[265].value ><br>threshold=0.8249524533748627   |
| Class: malignant peripheral nerve sheath tumour (MPNST) |                                                           |
|                                                         |                                                           |
| Rules_118                                               | passed counts:1                                           |
| node_0: feature_name=cg11915444                         | feature_id[1171].value ><br>threshold=0.3402601182460785  |
| node_10: feature_name=cg12109728                        | feature_id[2810].value ><br>threshold=0.7068270146846771  |
| node_20: feature_name=cg16412000                        | feature_id[789].value ><br>threshold=0.6741803884506226   |
| node_24: feature_name=cg17115147                        | feature_id[1434].value <=<br>threshold=0.2961975038051605 |
| node_25: feature_name=cg24474622                        | feature_id[2737].value ><br>threshold=0.7211934924125671  |
| node_29: feature_name=cg10472711                        | feature_id[612].value ><br>threshold=0.45985929667949677  |

|                                        |                                                           |
|----------------------------------------|-----------------------------------------------------------|
| node_37: feature_name=cg01937669       | feature_id[188].value <=<br>threshold=0.4809463769197464  |
| node_38: feature_name=cg02157052       | feature_id[451].value <=<br>threshold=0.2869153320789337  |
| node_39: feature_name=cg18751958       | feature_id[1427].value ><br>threshold=0.4813787043094635  |
| node_41: feature_name=cg22512847       | feature_id[1152].value ><br>threshold=0.5129324495792389  |
| node_43: feature_name=cg23345038       | feature_id[1147].value ><br>threshold=0.6318148374557495  |
| node_45: feature_name=cg17439009       | feature_id[1815].value ><br>threshold=0.48514117300510406 |
| node_337: feature_name=cg14005246      | feature_id[69].value <=<br>threshold=0.4851873368024826   |
| node_338: feature_name=cg23181573      | feature_id[3479].value ><br>threshold=0.5930750370025635  |
| node_340: feature_name=cg08775793      | feature_id[265].value <=<br>threshold=0.8249524533748627  |
| Class: malignant rhabdoid tumour (MRT) |                                                           |
|                                        |                                                           |
| Rules_119                              | passed counts:1                                           |
| node_0: feature_name=cg11915444        | feature_id[1171].value ><br>threshold=0.3402601182460785  |
| node_10: feature_name=cg12109728       | feature_id[2810].value ><br>threshold=0.7068270146846771  |
| node_20: feature_name=cg16412000       | feature_id[789].value ><br>threshold=0.6741803884506226   |
| node_24: feature_name=cg17115147       | feature_id[1434].value <=<br>threshold=0.2961975038051605 |
| node_25: feature_name=cg24474622       | feature_id[2737].value ><br>threshold=0.7211934924125671  |
| node_29: feature_name=cg10472711       | feature_id[612].value ><br>threshold=0.45985929667949677  |
| node_37: feature_name=cg01937669       | feature_id[188].value <=<br>threshold=0.4809463769197464  |
| node_38: feature_name=cg02157052       | feature_id[451].value <=<br>threshold=0.2869153320789337  |
| node_39: feature_name=cg18751958       | feature_id[1427].value ><br>threshold=0.4813787043094635  |
| node_41: feature_name=cg22512847       | feature_id[1152].value ><br>threshold=0.5129324495792389  |
| node_43: feature_name=cg23345038       | feature_id[1147].value ><br>threshold=0.6318148374557495  |

|                                                  |                                                            |
|--------------------------------------------------|------------------------------------------------------------|
| node_45: feature_name=cg17439009                 | feature_id[1815].value ><br>threshold=0.48514117300510406  |
| node_337: feature_name=cg14005246                | feature_id[69].value <=<br>threshold=0.4851873368024826    |
| node_338: feature_name=cg23181573                | feature_id[3479].value <=<br>threshold=0.5930750370025635  |
| Class: mesenchymal chondrosarcoma (CSA<br>(MES)) |                                                            |
| Rules_120                                        | passed counts:1                                            |
| node_0: feature_name=cg11915444                  | feature_id[1171].value ><br>threshold=0.3402601182460785   |
| node_10: feature_name=cg12109728                 | feature_id[2810].value ><br>threshold=0.7068270146846771   |
| node_20: feature_name=cg16412000                 | feature_id[789].value ><br>threshold=0.6741803884506226    |
| node_24: feature_name=cg17115147                 | feature_id[1434].value <=<br>threshold=0.2961975038051605  |
| node_25: feature_name=cg24474622                 | feature_id[2737].value ><br>threshold=0.7211934924125671   |
| node_29: feature_name=cg10472711                 | feature_id[612].value ><br>threshold=0.45985929667949677   |
| node_37: feature_name=cg01937669                 | feature_id[188].value <=<br>threshold=0.4809463769197464   |
| node_38: feature_name=cg02157052                 | feature_id[451].value <=<br>threshold=0.2869153320789337   |
| node_39: feature_name=cg18751958                 | feature_id[1427].value ><br>threshold=0.4813787043094635   |
| node_41: feature_name=cg22512847                 | feature_id[1152].value ><br>threshold=0.5129324495792389   |
| node_43: feature_name=cg23345038                 | feature_id[1147].value ><br>threshold=0.6318148374557495   |
| node_45: feature_name=cg17439009                 | feature_id[1815].value <=<br>threshold=0.48514117300510406 |
| node_46: feature_name=cg17537493                 | feature_id[2772].value ><br>threshold=0.5825372636318207   |
| node_52: feature_name=cg01683570                 | feature_id[110].value ><br>threshold=0.6040188074111938    |
| node_54: feature_name=cg15720017                 | feature_id[168].value ><br>threshold=0.7067741453647614    |
| node_60: feature_name=cg23690444                 | feature_id[120].value <=<br>threshold=0.16037724912166595  |

|                                                          |                                                           |
|----------------------------------------------------------|-----------------------------------------------------------|
| node_61: feature_name=cg00567872                         | feature_id[236].value ><br>threshold=0.7005765736103058   |
| node_85: feature_name=cg01014262                         | feature_id[764].value <=<br>threshold=0.5737917125225067  |
| node_86: feature_name=cg22946562                         | feature_id[1148].value ><br>threshold=0.6328203976154327  |
| node_134: feature_name=cg14514032                        | feature_id[202].value ><br>threshold=0.4389604330062866   |
| node_312: feature_name=cg21670987                        | feature_id[1509].value ><br>threshold=0.32477423548698425 |
| node_324: feature_name=cg10520924                        | feature_id[1943].value ><br>threshold=0.8430010974407196  |
| node_326: feature_name=cg15354065                        | feature_id[2790].value ><br>threshold=0.7598327696323395  |
| node_328: feature_name=cg22964758                        | feature_id[424].value ><br>threshold=0.68940070271492     |
| Class: high-grade endometrial stromal sarcoma (ESS (HG)) |                                                           |
|                                                          |                                                           |
| Rules_121                                                | passed counts:1                                           |
| node_0: feature_name=cg11915444                          | feature_id[1171].value ><br>threshold=0.3402601182460785  |
| node_10: feature_name=cg12109728                         | feature_id[2810].value ><br>threshold=0.7068270146846771  |
| node_20: feature_name=cg16412000                         | feature_id[789].value ><br>threshold=0.6741803884506226   |
| node_24: feature_name=cg17115147                         | feature_id[1434].value <=<br>threshold=0.2961975038051605 |
| node_25: feature_name=cg24474622                         | feature_id[2737].value ><br>threshold=0.7211934924125671  |
| node_29: feature_name=cg10472711                         | feature_id[612].value ><br>threshold=0.45985929667949677  |
| node_37: feature_name=cg01937669                         | feature_id[188].value <=<br>threshold=0.4809463769197464  |
| node_38: feature_name=cg02157052                         | feature_id[451].value <=<br>threshold=0.2869153320789337  |
| node_39: feature_name=cg18751958                         | feature_id[1427].value ><br>threshold=0.4813787043094635  |
| node_41: feature_name=cg22512847                         | feature_id[1152].value ><br>threshold=0.5129324495792389  |
| node_43: feature_name=cg23345038                         | feature_id[1147].value ><br>threshold=0.6318148374557495  |

|                                   |                                                            |
|-----------------------------------|------------------------------------------------------------|
| node_45: feature_name=cg17439009  | feature_id[1815].value <=<br>threshold=0.48514117300510406 |
| node_46: feature_name=cg17537493  | feature_id[2772].value ><br>threshold=0.5825372636318207   |
| node_52: feature_name=cg01683570  | feature_id[110].value ><br>threshold=0.6040188074111938    |
| node_54: feature_name=cg15720017  | feature_id[168].value ><br>threshold=0.7067741453647614    |
| node_60: feature_name=cg23690444  | feature_id[120].value <=<br>threshold=0.16037724912166595  |
| node_61: feature_name=cg00567872  | feature_id[236].value ><br>threshold=0.7005765736103058    |
| node_85: feature_name=cg01014262  | feature_id[764].value <=<br>threshold=0.5737917125225067   |
| node_86: feature_name=cg22946562  | feature_id[1148].value ><br>threshold=0.6328203976154327   |
| node_134: feature_name=cg14514032 | feature_id[202].value ><br>threshold=0.4389604330062866    |
| node_312: feature_name=cg21670987 | feature_id[1509].value ><br>threshold=0.32477423548698425  |
| node_324: feature_name=cg10520924 | feature_id[1943].value ><br>threshold=0.8430010974407196   |
| node_326: feature_name=cg15354065 | feature_id[2790].value ><br>threshold=0.7598327696323395   |
| node_328: feature_name=cg22964758 | feature_id[424].value <=<br>threshold=0.68940070271492     |
| Class: sarcoma (SARC)             |                                                            |
|                                   |                                                            |
| Rules_122                         | passed counts:1                                            |
| node_0: feature_name=cg11915444   | feature_id[1171].value ><br>threshold=0.3402601182460785   |
| node_10: feature_name=cg12109728  | feature_id[2810].value ><br>threshold=0.7068270146846771   |
| node_20: feature_name=cg16412000  | feature_id[789].value ><br>threshold=0.6741803884506226    |
| node_24: feature_name=cg17115147  | feature_id[1434].value <=<br>threshold=0.2961975038051605  |
| node_25: feature_name=cg24474622  | feature_id[2737].value ><br>threshold=0.7211934924125671   |
| node_29: feature_name=cg10472711  | feature_id[612].value ><br>threshold=0.45985929667949677   |
| node_37: feature_name=cg01937669  | feature_id[188].value <=<br>threshold=0.4809463769197464   |



|                                               |                                                            |
|-----------------------------------------------|------------------------------------------------------------|
| node_38: feature_name=cg02157052              | feature_id[451].value <=<br>threshold=0.2869153320789337   |
| node_39: feature_name=cg18751958              | feature_id[1427].value ><br>threshold=0.4813787043094635   |
| node_41: feature_name=cg22512847              | feature_id[1152].value ><br>threshold=0.5129324495792389   |
| node_43: feature_name=cg23345038              | feature_id[1147].value ><br>threshold=0.6318148374557495   |
| node_45: feature_name=cg17439009              | feature_id[1815].value <=<br>threshold=0.48514117300510406 |
| node_46: feature_name=cg17537493              | feature_id[2772].value ><br>threshold=0.5825372636318207   |
| node_52: feature_name=cg01683570              | feature_id[110].value ><br>threshold=0.6040188074111938    |
| node_54: feature_name=cg15720017              | feature_id[168].value ><br>threshold=0.7067741453647614    |
| node_60: feature_name=cg23690444              | feature_id[120].value <=<br>threshold=0.16037724912166595  |
| node_61: feature_name=cg00567872              | feature_id[236].value ><br>threshold=0.7005765736103058    |
| node_85: feature_name=cg01014262              | feature_id[764].value <=<br>threshold=0.5737917125225067   |
| node_86: feature_name=cg22946562              | feature_id[1148].value ><br>threshold=0.6328203976154327   |
| node_134: feature_name=cg14514032             | feature_id[202].value ><br>threshold=0.4389604330062866    |
| node_312: feature_name=cg21670987             | feature_id[1509].value ><br>threshold=0.32477423548698425  |
| node_324: feature_name=cg10520924             | feature_id[1943].value ><br>threshold=0.8430010974407196   |
| node_326: feature_name=cg15354065             | feature_id[2790].value <=<br>threshold=0.7598327696323395  |
| Class: embryonal rhabdomyosarcoma (RMS (EMB)) |                                                            |
|                                               |                                                            |
| Rules_123                                     | passed counts:1                                            |
| node_0: feature_name=cg11915444               | feature_id[1171].value ><br>threshold=0.3402601182460785   |
| node_10: feature_name=cg12109728              | feature_id[2810].value ><br>threshold=0.7068270146846771   |
| node_20: feature_name=cg16412000              | feature_id[789].value ><br>threshold=0.6741803884506226    |

|                                   |                                                            |
|-----------------------------------|------------------------------------------------------------|
| node_24: feature_name=cg17115147  | feature_id[1434].value <=<br>threshold=0.2961975038051605  |
| node_25: feature_name=cg24474622  | feature_id[2737].value ><br>threshold=0.7211934924125671   |
| node_29: feature_name=cg10472711  | feature_id[612].value ><br>threshold=0.45985929667949677   |
| node_37: feature_name=cg01937669  | feature_id[188].value <=<br>threshold=0.4809463769197464   |
| node_38: feature_name=cg02157052  | feature_id[451].value <=<br>threshold=0.2869153320789337   |
| node_39: feature_name=cg18751958  | feature_id[1427].value ><br>threshold=0.4813787043094635   |
| node_41: feature_name=cg22512847  | feature_id[1152].value ><br>threshold=0.5129324495792389   |
| node_43: feature_name=cg23345038  | feature_id[1147].value ><br>threshold=0.6318148374557495   |
| node_45: feature_name=cg17439009  | feature_id[1815].value <=<br>threshold=0.48514117300510406 |
| node_46: feature_name=cg17537493  | feature_id[2772].value ><br>threshold=0.5825372636318207   |
| node_52: feature_name=cg01683570  | feature_id[110].value ><br>threshold=0.6040188074111938    |
| node_54: feature_name=cg15720017  | feature_id[168].value ><br>threshold=0.7067741453647614    |
| node_60: feature_name=cg23690444  | feature_id[120].value <=<br>threshold=0.16037724912166595  |
| node_61: feature_name=cg00567872  | feature_id[236].value ><br>threshold=0.7005765736103058    |
| node_85: feature_name=cg01014262  | feature_id[764].value <=<br>threshold=0.5737917125225067   |
| node_86: feature_name=cg22946562  | feature_id[1148].value ><br>threshold=0.6328203976154327   |
| node_134: feature_name=cg14514032 | feature_id[202].value ><br>threshold=0.4389604330062866    |
| node_312: feature_name=cg21670987 | feature_id[1509].value <=<br>threshold=0.32477423548698425 |
| node_313: feature_name=cg12939390 | feature_id[143].value ><br>threshold=0.23070813715457916   |
| node_315: feature_name=cg10907727 | feature_id[284].value ><br>threshold=0.6596133708953857    |
| node_317: feature_name=cg21241424 | feature_id[1155].value <=<br>threshold=0.7687841951847076  |
| node_318: feature_name=cg19691659 | feature_id[953].value <=<br>threshold=0.6708230972290039   |

|                                                 |                                                            |
|-------------------------------------------------|------------------------------------------------------------|
| node_319: feature_name=cg04002063               | feature_id[2129].value ><br>threshold=0.8756260275840759   |
| Class: sclerosing epithelioid fibrosarcoma(SEF) |                                                            |
| Rules_124                                       | passed counts:1                                            |
| node_0: feature_name=cg11915444                 | feature_id[1171].value ><br>threshold=0.3402601182460785   |
| node_10: feature_name=cg12109728                | feature_id[2810].value ><br>threshold=0.7068270146846771   |
| node_20: feature_name=cg16412000                | feature_id[789].value ><br>threshold=0.6741803884506226    |
| node_24: feature_name=cg17115147                | feature_id[1434].value <=<br>threshold=0.2961975038051605  |
| node_25: feature_name=cg24474622                | feature_id[2737].value ><br>threshold=0.7211934924125671   |
| node_29: feature_name=cg10472711                | feature_id[612].value ><br>threshold=0.45985929667949677   |
| node_37: feature_name=cg01937669                | feature_id[188].value <=<br>threshold=0.4809463769197464   |
| node_38: feature_name=cg02157052                | feature_id[451].value <=<br>threshold=0.2869153320789337   |
| node_39: feature_name=cg18751958                | feature_id[1427].value ><br>threshold=0.4813787043094635   |
| node_41: feature_name=cg22512847                | feature_id[1152].value ><br>threshold=0.5129324495792389   |
| node_43: feature_name=cg23345038                | feature_id[1147].value ><br>threshold=0.6318148374557495   |
| node_45: feature_name=cg17439009                | feature_id[1815].value <=<br>threshold=0.48514117300510406 |
| node_46: feature_name=cg17537493                | feature_id[2772].value ><br>threshold=0.5825372636318207   |
| node_52: feature_name=cg01683570                | feature_id[110].value ><br>threshold=0.6040188074111938    |
| node_54: feature_name=cg15720017                | feature_id[168].value ><br>threshold=0.7067741453647614    |
| node_60: feature_name=cg23690444                | feature_id[120].value <=<br>threshold=0.16037724912166595  |
| node_61: feature_name=cg00567872                | feature_id[236].value ><br>threshold=0.7005765736103058    |
| node_85: feature_name=cg01014262                | feature_id[764].value <=<br>threshold=0.5737917125225067   |
| node_86: feature_name=cg22946562                | feature_id[1148].value ><br>threshold=0.6328203976154327   |

|                                                |                                                            |
|------------------------------------------------|------------------------------------------------------------|
| node_134: feature_name=cg14514032              | feature_id[202].value <=<br>threshold=0.4389604330062866   |
| node_135: feature_name=cg13488220              | feature_id[241].value ><br>threshold=0.7352153658866882    |
| node_143: feature_name=cg03840920              | feature_id[256].value ><br>threshold=0.502630889415741     |
| node_147: feature_name=cg13634090              | feature_id[822].value ><br>threshold=0.7207068204879761    |
| node_151: feature_name=cg19584674              | feature_id[2364].value ><br>threshold=0.41758519411087036  |
| node_307: feature_name=cg07795968              | feature_id[2451].value ><br>threshold=0.7859841883182526   |
| node_309: feature_name=cg12552626              | feature_id[687].value <=<br>threshold=0.893171489238739    |
| Class: clear cell sarcoma of the kidney (CCSK) |                                                            |
| Rules_125                                      | passed counts:1                                            |
| node_0: feature_name=cg11915444                | feature_id[1171].value ><br>threshold=0.3402601182460785   |
| node_10: feature_name=cg12109728               | feature_id[2810].value ><br>threshold=0.7068270146846771   |
| node_20: feature_name=cg16412000               | feature_id[789].value ><br>threshold=0.6741803884506226    |
| node_24: feature_name=cg17115147               | feature_id[1434].value <=<br>threshold=0.2961975038051605  |
| node_25: feature_name=cg24474622               | feature_id[2737].value ><br>threshold=0.7211934924125671   |
| node_29: feature_name=cg10472711               | feature_id[612].value ><br>threshold=0.45985929667949677   |
| node_37: feature_name=cg01937669               | feature_id[188].value <=<br>threshold=0.4809463769197464   |
| node_38: feature_name=cg02157052               | feature_id[451].value <=<br>threshold=0.2869153320789337   |
| node_39: feature_name=cg18751958               | feature_id[1427].value ><br>threshold=0.4813787043094635   |
| node_41: feature_name=cg22512847               | feature_id[1152].value ><br>threshold=0.5129324495792389   |
| node_43: feature_name=cg23345038               | feature_id[1147].value ><br>threshold=0.6318148374557495   |
| node_45: feature_name=cg17439009               | feature_id[1815].value <=<br>threshold=0.48514117300510406 |
| node_46: feature_name=cg17537493               | feature_id[2772].value ><br>threshold=0.5825372636318207   |

|                                   |                                                            |
|-----------------------------------|------------------------------------------------------------|
| node_52: feature_name=cg01683570  | feature_id[110].value ><br>threshold=0.6040188074111938    |
| node_54: feature_name=cg15720017  | feature_id[168].value ><br>threshold=0.7067741453647614    |
| node_60: feature_name=cg23690444  | feature_id[120].value <=<br>threshold=0.16037724912166595  |
| node_61: feature_name=cg00567872  | feature_id[236].value ><br>threshold=0.7005765736103058    |
| node_85: feature_name=cg01014262  | feature_id[764].value <=<br>threshold=0.5737917125225067   |
| node_86: feature_name=cg22946562  | feature_id[1148].value ><br>threshold=0.6328203976154327   |
| node_134: feature_name=cg14514032 | feature_id[202].value <=<br>threshold=0.4389604330062866   |
| node_135: feature_name=cg13488220 | feature_id[241].value ><br>threshold=0.7352153658866882    |
| node_143: feature_name=cg03840920 | feature_id[256].value ><br>threshold=0.502630889415741     |
| node_147: feature_name=cg13634090 | feature_id[822].value ><br>threshold=0.7207068204879761    |
| node_151: feature_name=cg19584674 | feature_id[2364].value <=<br>threshold=0.41758519411087036 |
| node_152: feature_name=cg07344990 | feature_id[411].value ><br>threshold=0.5484964847564697    |
| node_158: feature_name=cg10298992 | feature_id[3066].value ><br>threshold=0.5707973837852478   |
| node_174: feature_name=cg11843516 | feature_id[20].value <=<br>threshold=0.5590928494930267    |
| node_175: feature_name=cg05185926 | feature_id[448].value ><br>threshold=0.17318664491176605   |
| node_177: feature_name=cg17009731 | feature_id[1220].value ><br>threshold=0.6666513085365295   |
| node_179: feature_name=cg01380319 | feature_id[515].value <=<br>threshold=0.39251960813999176  |
| node_180: feature_name=cg20700977 | feature_id[303].value ><br>threshold=0.8422040641307831    |
| node_184: feature_name=cg24259291 | feature_id[164].value ><br>threshold=0.4872268736362457    |
| node_188: feature_name=cg08097657 | feature_id[67].value ><br>threshold=0.3371318429708481     |
| node_190: feature_name=cg07891483 | feature_id[59].value ><br>threshold=0.6211732923984528     |
| node_194: feature_name=cg20122645 | feature_id[275].value ><br>threshold=0.6094755828380585    |

|                                        |                                                            |
|----------------------------------------|------------------------------------------------------------|
| node_196: feature_name=cg04026354      | feature_id[1763].value ><br>threshold=0.4341808259487152   |
| node_286: feature_name=cg25408950      | feature_id[772].value ><br>threshold=0.680083692073822     |
| node_290: feature_name=cg15188939      | feature_id[1626].value ><br>threshold=0.6365727782249451   |
| node_294: feature_name=cg00444740      | feature_id[3167].value ><br>threshold=0.5775478780269623   |
| node_296: feature_name=cg03555203      | feature_id[3682].value ><br>threshold=0.8000460863113403   |
| node_298: feature_name=cg26685539      | feature_id[1788].value ><br>threshold=0.8831613063812256   |
| node_300: feature_name=cg02353448      | feature_id[74].value ><br>threshold=0.9122499525547028     |
| node_302: feature_name=cg02707799      | feature_id[3403].value ><br>threshold=0.7753476798534393   |
| Class: malignant rhabdoid tumour (MRT) |                                                            |
| Rules_126                              | passed counts:1                                            |
| node_0: feature_name=cg11915444        | feature_id[1171].value ><br>threshold=0.3402601182460785   |
| node_10: feature_name=cg12109728       | feature_id[2810].value ><br>threshold=0.7068270146846771   |
| node_20: feature_name=cg16412000       | feature_id[789].value ><br>threshold=0.6741803884506226    |
| node_24: feature_name=cg17115147       | feature_id[1434].value <=<br>threshold=0.2961975038051605  |
| node_25: feature_name=cg24474622       | feature_id[2737].value ><br>threshold=0.7211934924125671   |
| node_29: feature_name=cg10472711       | feature_id[612].value ><br>threshold=0.45985929667949677   |
| node_37: feature_name=cg01937669       | feature_id[188].value <=<br>threshold=0.4809463769197464   |
| node_38: feature_name=cg02157052       | feature_id[451].value <=<br>threshold=0.2869153320789337   |
| node_39: feature_name=cg18751958       | feature_id[1427].value ><br>threshold=0.4813787043094635   |
| node_41: feature_name=cg22512847       | feature_id[1152].value ><br>threshold=0.5129324495792389   |
| node_43: feature_name=cg23345038       | feature_id[1147].value ><br>threshold=0.6318148374557495   |
| node_45: feature_name=cg17439009       | feature_id[1815].value <=<br>threshold=0.48514117300510406 |

|                                   |                                                            |
|-----------------------------------|------------------------------------------------------------|
| node_46: feature_name=cg17537493  | feature_id[2772].value ><br>threshold=0.5825372636318207   |
| node_52: feature_name=cg01683570  | feature_id[110].value ><br>threshold=0.6040188074111938    |
| node_54: feature_name=cg15720017  | feature_id[168].value ><br>threshold=0.7067741453647614    |
| node_60: feature_name=cg23690444  | feature_id[120].value <=<br>threshold=0.16037724912166595  |
| node_61: feature_name=cg00567872  | feature_id[236].value ><br>threshold=0.7005765736103058    |
| node_85: feature_name=cg01014262  | feature_id[764].value <=<br>threshold=0.5737917125225067   |
| node_86: feature_name=cg22946562  | feature_id[1148].value ><br>threshold=0.6328203976154327   |
| node_134: feature_name=cg14514032 | feature_id[202].value <=<br>threshold=0.4389604330062866   |
| node_135: feature_name=cg13488220 | feature_id[241].value ><br>threshold=0.7352153658866882    |
| node_143: feature_name=cg03840920 | feature_id[256].value ><br>threshold=0.502630889415741     |
| node_147: feature_name=cg13634090 | feature_id[822].value ><br>threshold=0.7207068204879761    |
| node_151: feature_name=cg19584674 | feature_id[2364].value <=<br>threshold=0.41758519411087036 |
| node_152: feature_name=cg07344990 | feature_id[411].value ><br>threshold=0.5484964847564697    |
| node_158: feature_name=cg10298992 | feature_id[3066].value ><br>threshold=0.5707973837852478   |
| node_174: feature_name=cg11843516 | feature_id[20].value <=<br>threshold=0.5590928494930267    |
| node_175: feature_name=cg05185926 | feature_id[448].value ><br>threshold=0.17318664491176605   |
| node_177: feature_name=cg17009731 | feature_id[1220].value ><br>threshold=0.6666513085365295   |
| node_179: feature_name=cg01380319 | feature_id[515].value <=<br>threshold=0.39251960813999176  |
| node_180: feature_name=cg20700977 | feature_id[303].value ><br>threshold=0.8422040641307831    |
| node_184: feature_name=cg24259291 | feature_id[164].value ><br>threshold=0.4872268736362457    |
| node_188: feature_name=cg08097657 | feature_id[67].value ><br>threshold=0.3371318429708481     |
| node_190: feature_name=cg07891483 | feature_id[59].value ><br>threshold=0.6211732923984528     |

|                                   |                                                           |
|-----------------------------------|-----------------------------------------------------------|
| node_194: feature_name=cg20122645 | feature_id[275].value ><br>threshold=0.6094755828380585   |
| node_196: feature_name=cg04026354 | feature_id[1763].value ><br>threshold=0.4341808259487152  |
| node_286: feature_name=cg25408950 | feature_id[772].value ><br>threshold=0.680083692073822    |
| node_290: feature_name=cg15188939 | feature_id[1626].value ><br>threshold=0.6365727782249451  |
| node_294: feature_name=cg00444740 | feature_id[3167].value ><br>threshold=0.5775478780269623  |
| node_296: feature_name=cg03555203 | feature_id[3682].value ><br>threshold=0.8000460863113403  |
| node_298: feature_name=cg26685539 | feature_id[1788].value ><br>threshold=0.8831613063812256  |
| node_300: feature_name=cg02353448 | feature_id[74].value ><br>threshold=0.9122499525547028    |
| node_302: feature_name=cg02707799 | feature_id[3403].value <=<br>threshold=0.7753476798534393 |
| Class: angiosarcoma (AS)          |                                                           |
|                                   |                                                           |
| Rules_127                         | passed counts:1                                           |
| node_0: feature_name=cg11915444   | feature_id[1171].value ><br>threshold=0.3402601182460785  |
| node_10: feature_name=cg12109728  | feature_id[2810].value ><br>threshold=0.7068270146846771  |
| node_20: feature_name=cg16412000  | feature_id[789].value ><br>threshold=0.6741803884506226   |
| node_24: feature_name=cg17115147  | feature_id[1434].value <=<br>threshold=0.2961975038051605 |
| node_25: feature_name=cg24474622  | feature_id[2737].value ><br>threshold=0.7211934924125671  |
| node_29: feature_name=cg10472711  | feature_id[612].value ><br>threshold=0.45985929667949677  |
| node_37: feature_name=cg01937669  | feature_id[188].value <=<br>threshold=0.4809463769197464  |
| node_38: feature_name=cg02157052  | feature_id[451].value <=<br>threshold=0.2869153320789337  |
| node_39: feature_name=cg18751958  | feature_id[1427].value ><br>threshold=0.4813787043094635  |
| node_41: feature_name=cg22512847  | feature_id[1152].value ><br>threshold=0.5129324495792389  |
| node_43: feature_name=cg23345038  | feature_id[1147].value ><br>threshold=0.6318148374557495  |



|                                   |                                                            |
|-----------------------------------|------------------------------------------------------------|
| node_45: feature_name=cg17439009  | feature_id[1815].value <=<br>threshold=0.48514117300510406 |
| node_46: feature_name=cg17537493  | feature_id[2772].value ><br>threshold=0.5825372636318207   |
| node_52: feature_name=cg01683570  | feature_id[110].value ><br>threshold=0.6040188074111938    |
| node_54: feature_name=cg15720017  | feature_id[168].value ><br>threshold=0.7067741453647614    |
| node_60: feature_name=cg23690444  | feature_id[120].value <=<br>threshold=0.16037724912166595  |
| node_61: feature_name=cg00567872  | feature_id[236].value ><br>threshold=0.7005765736103058    |
| node_85: feature_name=cg01014262  | feature_id[764].value <=<br>threshold=0.5737917125225067   |
| node_86: feature_name=cg22946562  | feature_id[1148].value ><br>threshold=0.6328203976154327   |
| node_134: feature_name=cg14514032 | feature_id[202].value <=<br>threshold=0.4389604330062866   |
| node_135: feature_name=cg13488220 | feature_id[241].value ><br>threshold=0.7352153658866882    |
| node_143: feature_name=cg03840920 | feature_id[256].value ><br>threshold=0.502630889415741     |
| node_147: feature_name=cg13634090 | feature_id[822].value ><br>threshold=0.7207068204879761    |
| node_151: feature_name=cg19584674 | feature_id[2364].value <=<br>threshold=0.41758519411087036 |
| node_152: feature_name=cg07344990 | feature_id[411].value ><br>threshold=0.5484964847564697    |
| node_158: feature_name=cg10298992 | feature_id[3066].value ><br>threshold=0.5707973837852478   |
| node_174: feature_name=cg11843516 | feature_id[20].value <=<br>threshold=0.5590928494930267    |
| node_175: feature_name=cg05185926 | feature_id[448].value ><br>threshold=0.17318664491176605   |
| node_177: feature_name=cg17009731 | feature_id[1220].value ><br>threshold=0.6666513085365295   |
| node_179: feature_name=cg01380319 | feature_id[515].value <=<br>threshold=0.39251960813999176  |
| node_180: feature_name=cg20700977 | feature_id[303].value ><br>threshold=0.8422040641307831    |
| node_184: feature_name=cg24259291 | feature_id[164].value ><br>threshold=0.4872268736362457    |
| node_188: feature_name=cg08097657 | feature_id[67].value ><br>threshold=0.3371318429708481     |

|                                   |                                                            |
|-----------------------------------|------------------------------------------------------------|
| node_190: feature_name=cg07891483 | feature_id[59].value ><br>threshold=0.6211732923984528     |
| node_194: feature_name=cg20122645 | feature_id[275].value ><br>threshold=0.6094755828380585    |
| node_196: feature_name=cg04026354 | feature_id[1763].value ><br>threshold=0.4341808259487152   |
| node_286: feature_name=cg25408950 | feature_id[772].value ><br>threshold=0.680083692073822     |
| node_290: feature_name=cg15188939 | feature_id[1626].value <=<br>threshold=0.6365727782249451  |
| node_291: feature_name=cg23421128 | feature_id[1104].value <=<br>threshold=0.14253754168748856 |
| Class: sarcoma (SARC)             |                                                            |
|                                   |                                                            |
| Rules_128                         | passed counts:1                                            |
| node_0: feature_name=cg11915444   | feature_id[1171].value ><br>threshold=0.3402601182460785   |
| node_10: feature_name=cg12109728  | feature_id[2810].value ><br>threshold=0.7068270146846771   |
| node_20: feature_name=cg16412000  | feature_id[789].value ><br>threshold=0.6741803884506226    |
| node_24: feature_name=cg17115147  | feature_id[1434].value <=<br>threshold=0.2961975038051605  |
| node_25: feature_name=cg24474622  | feature_id[2737].value ><br>threshold=0.7211934924125671   |
| node_29: feature_name=cg10472711  | feature_id[612].value ><br>threshold=0.45985929667949677   |
| node_37: feature_name=cg01937669  | feature_id[188].value <=<br>threshold=0.4809463769197464   |
| node_38: feature_name=cg02157052  | feature_id[451].value <=<br>threshold=0.2869153320789337   |
| node_39: feature_name=cg18751958  | feature_id[1427].value ><br>threshold=0.4813787043094635   |
| node_41: feature_name=cg22512847  | feature_id[1152].value ><br>threshold=0.5129324495792389   |
| node_43: feature_name=cg23345038  | feature_id[1147].value ><br>threshold=0.6318148374557495   |
| node_45: feature_name=cg17439009  | feature_id[1815].value <=<br>threshold=0.48514117300510406 |
| node_46: feature_name=cg17537493  | feature_id[2772].value ><br>threshold=0.5825372636318207   |
| node_52: feature_name=cg01683570  | feature_id[110].value ><br>threshold=0.6040188074111938    |

|                                   |                                                            |
|-----------------------------------|------------------------------------------------------------|
| node_54: feature_name=cg15720017  | feature_id[168].value ><br>threshold=0.7067741453647614    |
| node_60: feature_name=cg23690444  | feature_id[120].value <=<br>threshold=0.16037724912166595  |
| node_61: feature_name=cg00567872  | feature_id[236].value ><br>threshold=0.7005765736103058    |
| node_85: feature_name=cg01014262  | feature_id[764].value <=<br>threshold=0.5737917125225067   |
| node_86: feature_name=cg22946562  | feature_id[1148].value ><br>threshold=0.6328203976154327   |
| node_134: feature_name=cg14514032 | feature_id[202].value <=<br>threshold=0.4389604330062866   |
| node_135: feature_name=cg13488220 | feature_id[241].value ><br>threshold=0.7352153658866882    |
| node_143: feature_name=cg03840920 | feature_id[256].value ><br>threshold=0.502630889415741     |
| node_147: feature_name=cg13634090 | feature_id[822].value ><br>threshold=0.7207068204879761    |
| node_151: feature_name=cg19584674 | feature_id[2364].value <=<br>threshold=0.41758519411087036 |
| node_152: feature_name=cg07344990 | feature_id[411].value ><br>threshold=0.5484964847564697    |
| node_158: feature_name=cg10298992 | feature_id[3066].value ><br>threshold=0.5707973837852478   |
| node_174: feature_name=cg11843516 | feature_id[20].value <=<br>threshold=0.5590928494930267    |
| node_175: feature_name=cg05185926 | feature_id[448].value ><br>threshold=0.17318664491176605   |
| node_177: feature_name=cg17009731 | feature_id[1220].value ><br>threshold=0.6666513085365295   |
| node_179: feature_name=cg01380319 | feature_id[515].value <=<br>threshold=0.39251960813999176  |
| node_180: feature_name=cg20700977 | feature_id[303].value ><br>threshold=0.8422040641307831    |
| node_184: feature_name=cg24259291 | feature_id[164].value ><br>threshold=0.4872268736362457    |
| node_188: feature_name=cg08097657 | feature_id[67].value ><br>threshold=0.3371318429708481     |
| node_190: feature_name=cg07891483 | feature_id[59].value ><br>threshold=0.6211732923984528     |
| node_194: feature_name=cg20122645 | feature_id[275].value ><br>threshold=0.6094755828380585    |
| node_196: feature_name=cg04026354 | feature_id[1763].value <=<br>threshold=0.4341808259487152  |

|                                                                                      |                                                            |
|--------------------------------------------------------------------------------------|------------------------------------------------------------|
| node_197: feature_name=cg10149889                                                    | feature_id[1017].value ><br>threshold=0.6150195300579071   |
| node_201: feature_name=cg14890730                                                    | feature_id[337].value ><br>threshold=0.4372602105140686    |
| node_279: feature_name=cg27143703                                                    | feature_id[3174].value <=<br>threshold=0.42068085074424744 |
| node_280: feature_name=cg01856887                                                    | feature_id[1987].value ><br>threshold=0.6295701563358307   |
| node_282: feature_name=cg00503920                                                    | feature_id[3717].value ><br>threshold=0.8432826399803162   |
| Class: well differentiated liposarcoma<br>(WDLS)/dedifferentiated liposarcoma (DDLs) |                                                            |
|                                                                                      |                                                            |
| Rules_129                                                                            | passed counts:1                                            |
| node_0: feature_name=cg11915444                                                      | feature_id[1171].value ><br>threshold=0.3402601182460785   |
| node_10: feature_name=cg12109728                                                     | feature_id[2810].value ><br>threshold=0.7068270146846771   |
| node_20: feature_name=cg16412000                                                     | feature_id[789].value ><br>threshold=0.6741803884506226    |
| node_24: feature_name=cg17115147                                                     | feature_id[1434].value <=<br>threshold=0.2961975038051605  |
| node_25: feature_name=cg24474622                                                     | feature_id[2737].value ><br>threshold=0.7211934924125671   |
| node_29: feature_name=cg10472711                                                     | feature_id[612].value ><br>threshold=0.45985929667949677   |
| node_37: feature_name=cg01937669                                                     | feature_id[188].value <=<br>threshold=0.4809463769197464   |
| node_38: feature_name=cg02157052                                                     | feature_id[451].value <=<br>threshold=0.2869153320789337   |
| node_39: feature_name=cg18751958                                                     | feature_id[1427].value ><br>threshold=0.4813787043094635   |
| node_41: feature_name=cg22512847                                                     | feature_id[1152].value ><br>threshold=0.5129324495792389   |
| node_43: feature_name=cg23345038                                                     | feature_id[1147].value ><br>threshold=0.6318148374557495   |
| node_45: feature_name=cg17439009                                                     | feature_id[1815].value <=<br>threshold=0.48514117300510406 |
| node_46: feature_name=cg17537493                                                     | feature_id[2772].value ><br>threshold=0.5825372636318207   |
| node_52: feature_name=cg01683570                                                     | feature_id[110].value ><br>threshold=0.6040188074111938    |

|                                   |                                                            |
|-----------------------------------|------------------------------------------------------------|
| node_54: feature_name=cg15720017  | feature_id[168].value ><br>threshold=0.7067741453647614    |
| node_60: feature_name=cg23690444  | feature_id[120].value <=<br>threshold=0.16037724912166595  |
| node_61: feature_name=cg00567872  | feature_id[236].value ><br>threshold=0.7005765736103058    |
| node_85: feature_name=cg01014262  | feature_id[764].value <=<br>threshold=0.5737917125225067   |
| node_86: feature_name=cg22946562  | feature_id[1148].value ><br>threshold=0.6328203976154327   |
| node_134: feature_name=cg14514032 | feature_id[202].value <=<br>threshold=0.4389604330062866   |
| node_135: feature_name=cg13488220 | feature_id[241].value ><br>threshold=0.7352153658866882    |
| node_143: feature_name=cg03840920 | feature_id[256].value ><br>threshold=0.502630889415741     |
| node_147: feature_name=cg13634090 | feature_id[822].value ><br>threshold=0.7207068204879761    |
| node_151: feature_name=cg19584674 | feature_id[2364].value <=<br>threshold=0.41758519411087036 |
| node_152: feature_name=cg07344990 | feature_id[411].value ><br>threshold=0.5484964847564697    |
| node_158: feature_name=cg10298992 | feature_id[3066].value ><br>threshold=0.5707973837852478   |
| node_174: feature_name=cg11843516 | feature_id[20].value <=<br>threshold=0.5590928494930267    |
| node_175: feature_name=cg05185926 | feature_id[448].value ><br>threshold=0.17318664491176605   |
| node_177: feature_name=cg17009731 | feature_id[1220].value ><br>threshold=0.6666513085365295   |
| node_179: feature_name=cg01380319 | feature_id[515].value <=<br>threshold=0.39251960813999176  |
| node_180: feature_name=cg20700977 | feature_id[303].value ><br>threshold=0.8422040641307831    |
| node_184: feature_name=cg24259291 | feature_id[164].value ><br>threshold=0.4872268736362457    |
| node_188: feature_name=cg08097657 | feature_id[67].value ><br>threshold=0.3371318429708481     |
| node_190: feature_name=cg07891483 | feature_id[59].value ><br>threshold=0.6211732923984528     |
| node_194: feature_name=cg20122645 | feature_id[275].value ><br>threshold=0.6094755828380585    |
| node_196: feature_name=cg04026354 | feature_id[1763].value <=<br>threshold=0.4341808259487152  |

|                                                                         |                                                            |
|-------------------------------------------------------------------------|------------------------------------------------------------|
| node_197: feature_name=cg10149889                                       | feature_id[1017].value ><br>threshold=0.6150195300579071   |
| node_201: feature_name=cg14890730                                       | feature_id[337].value ><br>threshold=0.4372602105140686    |
| node_279: feature_name=cg27143703                                       | feature_id[3174].value <=<br>threshold=0.42068085074424744 |
| node_280: feature_name=cg01856887                                       | feature_id[1987].value ><br>threshold=0.6295701563358307   |
| node_282: feature_name=cg00503920                                       | feature_id[3717].value <=<br>threshold=0.8432826399803162  |
| Class: atypical fibroxanthoma<br>(AFX)/pleomorphic dermal sarcoma (PDS) |                                                            |
| Rules_130                                                               | passed counts:1                                            |
| node_0: feature_name=cg11915444                                         | feature_id[1171].value ><br>threshold=0.3402601182460785   |
| node_10: feature_name=cg12109728                                        | feature_id[2810].value ><br>threshold=0.7068270146846771   |
| node_20: feature_name=cg16412000                                        | feature_id[789].value ><br>threshold=0.6741803884506226    |
| node_24: feature_name=cg17115147                                        | feature_id[1434].value <=<br>threshold=0.2961975038051605  |
| node_25: feature_name=cg24474622                                        | feature_id[2737].value ><br>threshold=0.7211934924125671   |
| node_29: feature_name=cg10472711                                        | feature_id[612].value ><br>threshold=0.45985929667949677   |
| node_37: feature_name=cg01937669                                        | feature_id[188].value <=<br>threshold=0.4809463769197464   |
| node_38: feature_name=cg02157052                                        | feature_id[451].value <=<br>threshold=0.2869153320789337   |
| node_39: feature_name=cg18751958                                        | feature_id[1427].value ><br>threshold=0.4813787043094635   |
| node_41: feature_name=cg22512847                                        | feature_id[1152].value ><br>threshold=0.5129324495792389   |
| node_43: feature_name=cg23345038                                        | feature_id[1147].value ><br>threshold=0.6318148374557495   |
| node_45: feature_name=cg17439009                                        | feature_id[1815].value <=<br>threshold=0.48514117300510406 |
| node_46: feature_name=cg17537493                                        | feature_id[2772].value ><br>threshold=0.5825372636318207   |
| node_52: feature_name=cg01683570                                        | feature_id[110].value ><br>threshold=0.6040188074111938    |

|                                   |                                                            |
|-----------------------------------|------------------------------------------------------------|
| node_54: feature_name=cg15720017  | feature_id[168].value ><br>threshold=0.7067741453647614    |
| node_60: feature_name=cg23690444  | feature_id[120].value <=<br>threshold=0.16037724912166595  |
| node_61: feature_name=cg00567872  | feature_id[236].value ><br>threshold=0.7005765736103058    |
| node_85: feature_name=cg01014262  | feature_id[764].value <=<br>threshold=0.5737917125225067   |
| node_86: feature_name=cg22946562  | feature_id[1148].value ><br>threshold=0.6328203976154327   |
| node_134: feature_name=cg14514032 | feature_id[202].value <=<br>threshold=0.4389604330062866   |
| node_135: feature_name=cg13488220 | feature_id[241].value ><br>threshold=0.7352153658866882    |
| node_143: feature_name=cg03840920 | feature_id[256].value ><br>threshold=0.502630889415741     |
| node_147: feature_name=cg13634090 | feature_id[822].value ><br>threshold=0.7207068204879761    |
| node_151: feature_name=cg19584674 | feature_id[2364].value <=<br>threshold=0.41758519411087036 |
| node_152: feature_name=cg07344990 | feature_id[411].value ><br>threshold=0.5484964847564697    |
| node_158: feature_name=cg10298992 | feature_id[3066].value ><br>threshold=0.5707973837852478   |
| node_174: feature_name=cg11843516 | feature_id[20].value <=<br>threshold=0.5590928494930267    |
| node_175: feature_name=cg05185926 | feature_id[448].value ><br>threshold=0.17318664491176605   |
| node_177: feature_name=cg17009731 | feature_id[1220].value ><br>threshold=0.6666513085365295   |
| node_179: feature_name=cg01380319 | feature_id[515].value <=<br>threshold=0.39251960813999176  |
| node_180: feature_name=cg20700977 | feature_id[303].value ><br>threshold=0.8422040641307831    |
| node_184: feature_name=cg24259291 | feature_id[164].value ><br>threshold=0.4872268736362457    |
| node_188: feature_name=cg08097657 | feature_id[67].value ><br>threshold=0.3371318429708481     |
| node_190: feature_name=cg07891483 | feature_id[59].value ><br>threshold=0.6211732923984528     |
| node_194: feature_name=cg20122645 | feature_id[275].value ><br>threshold=0.6094755828380585    |
| node_196: feature_name=cg04026354 | feature_id[1763].value <=<br>threshold=0.4341808259487152  |

|                                   |                                                            |
|-----------------------------------|------------------------------------------------------------|
| node_197: feature_name=cg10149889 | feature_id[1017].value ><br>threshold=0.6150195300579071   |
| node_201: feature_name=cg14890730 | feature_id[337].value ><br>threshold=0.4372602105140686    |
| node_279: feature_name=cg27143703 | feature_id[3174].value <=<br>threshold=0.42068085074424744 |
| node_280: feature_name=cg01856887 | feature_id[1987].value <=<br>threshold=0.6295701563358307  |
| Class: fibrous dysplasia (FDY)    |                                                            |
| Rules_131                         | passed counts:1                                            |
| node_0: feature_name=cg11915444   | feature_id[1171].value ><br>threshold=0.3402601182460785   |
| node_10: feature_name=cg12109728  | feature_id[2810].value ><br>threshold=0.7068270146846771   |
| node_20: feature_name=cg16412000  | feature_id[789].value ><br>threshold=0.6741803884506226    |
| node_24: feature_name=cg17115147  | feature_id[1434].value <=<br>threshold=0.2961975038051605  |
| node_25: feature_name=cg24474622  | feature_id[2737].value ><br>threshold=0.7211934924125671   |
| node_29: feature_name=cg10472711  | feature_id[612].value ><br>threshold=0.45985929667949677   |
| node_37: feature_name=cg01937669  | feature_id[188].value <=<br>threshold=0.4809463769197464   |
| node_38: feature_name=cg02157052  | feature_id[451].value <=<br>threshold=0.2869153320789337   |
| node_39: feature_name=cg18751958  | feature_id[1427].value ><br>threshold=0.4813787043094635   |
| node_41: feature_name=cg22512847  | feature_id[1152].value ><br>threshold=0.5129324495792389   |
| node_43: feature_name=cg23345038  | feature_id[1147].value ><br>threshold=0.6318148374557495   |
| node_45: feature_name=cg17439009  | feature_id[1815].value <=<br>threshold=0.48514117300510406 |
| node_46: feature_name=cg17537493  | feature_id[2772].value ><br>threshold=0.5825372636318207   |
| node_52: feature_name=cg01683570  | feature_id[110].value ><br>threshold=0.6040188074111938    |
| node_54: feature_name=cg15720017  | feature_id[168].value ><br>threshold=0.7067741453647614    |
| node_60: feature_name=cg23690444  | feature_id[120].value <=<br>threshold=0.16037724912166595  |



|                                   |                                                            |
|-----------------------------------|------------------------------------------------------------|
| node_61: feature_name=cg00567872  | feature_id[236].value ><br>threshold=0.7005765736103058    |
| node_85: feature_name=cg01014262  | feature_id[764].value <=<br>threshold=0.5737917125225067   |
| node_86: feature_name=cg22946562  | feature_id[1148].value ><br>threshold=0.6328203976154327   |
| node_134: feature_name=cg14514032 | feature_id[202].value <=<br>threshold=0.4389604330062866   |
| node_135: feature_name=cg13488220 | feature_id[241].value ><br>threshold=0.7352153658866882    |
| node_143: feature_name=cg03840920 | feature_id[256].value ><br>threshold=0.502630889415741     |
| node_147: feature_name=cg13634090 | feature_id[822].value ><br>threshold=0.7207068204879761    |
| node_151: feature_name=cg19584674 | feature_id[2364].value <=<br>threshold=0.41758519411087036 |
| node_152: feature_name=cg07344990 | feature_id[411].value ><br>threshold=0.5484964847564697    |
| node_158: feature_name=cg10298992 | feature_id[3066].value ><br>threshold=0.5707973837852478   |
| node_174: feature_name=cg11843516 | feature_id[20].value <=<br>threshold=0.5590928494930267    |
| node_175: feature_name=cg05185926 | feature_id[448].value ><br>threshold=0.17318664491176605   |
| node_177: feature_name=cg17009731 | feature_id[1220].value ><br>threshold=0.6666513085365295   |
| node_179: feature_name=cg01380319 | feature_id[515].value <=<br>threshold=0.39251960813999176  |
| node_180: feature_name=cg20700977 | feature_id[303].value ><br>threshold=0.8422040641307831    |
| node_184: feature_name=cg24259291 | feature_id[164].value ><br>threshold=0.4872268736362457    |
| node_188: feature_name=cg08097657 | feature_id[67].value ><br>threshold=0.3371318429708481     |
| node_190: feature_name=cg07891483 | feature_id[59].value ><br>threshold=0.6211732923984528     |
| node_194: feature_name=cg20122645 | feature_id[275].value ><br>threshold=0.6094755828380585    |
| node_196: feature_name=cg04026354 | feature_id[1763].value <=<br>threshold=0.4341808259487152  |
| node_197: feature_name=cg10149889 | feature_id[1017].value ><br>threshold=0.6150195300579071   |
| node_201: feature_name=cg14890730 | feature_id[337].value <=<br>threshold=0.4372602105140686   |

|                                   |                                                            |
|-----------------------------------|------------------------------------------------------------|
| node_202: feature_name=cg08331427 | feature_id[132].value ><br>threshold=0.5443233847618103    |
| node_208: feature_name=cg22730007 | feature_id[2544].value ><br>threshold=0.28619489073753357  |
| node_210: feature_name=cg17193551 | feature_id[2057].value ><br>threshold=0.4393353909254074   |
| node_212: feature_name=cg14671764 | feature_id[584].value ><br>threshold=0.9353199899196625    |
| node_268: feature_name=cg21377260 | feature_id[534].value <=<br>threshold=0.9840706288814545   |
| node_269: feature_name=cg27143326 | feature_id[1403].value <=<br>threshold=0.8949433267116547  |
| node_270: feature_name=cg01339351 | feature_id[2694].value <=<br>threshold=0.8992902934551239  |
| node_271: feature_name=cg03407184 | feature_id[3141].value ><br>threshold=0.7490815222263336   |
| Class: Ewing sarcoma (EWING)      |                                                            |
|                                   |                                                            |
| Rules_132                         | passed counts:1                                            |
| node_0: feature_name=cg11915444   | feature_id[1171].value ><br>threshold=0.3402601182460785   |
| node_10: feature_name=cg12109728  | feature_id[2810].value ><br>threshold=0.7068270146846771   |
| node_20: feature_name=cg16412000  | feature_id[789].value ><br>threshold=0.6741803884506226    |
| node_24: feature_name=cg17115147  | feature_id[1434].value <=<br>threshold=0.2961975038051605  |
| node_25: feature_name=cg24474622  | feature_id[2737].value ><br>threshold=0.7211934924125671   |
| node_29: feature_name=cg10472711  | feature_id[612].value ><br>threshold=0.45985929667949677   |
| node_37: feature_name=cg01937669  | feature_id[188].value <=<br>threshold=0.4809463769197464   |
| node_38: feature_name=cg02157052  | feature_id[451].value <=<br>threshold=0.2869153320789337   |
| node_39: feature_name=cg18751958  | feature_id[1427].value ><br>threshold=0.4813787043094635   |
| node_41: feature_name=cg22512847  | feature_id[1152].value ><br>threshold=0.5129324495792389   |
| node_43: feature_name=cg23345038  | feature_id[1147].value ><br>threshold=0.6318148374557495   |
| node_45: feature_name=cg17439009  | feature_id[1815].value <=<br>threshold=0.48514117300510406 |

|                                   |                                                            |
|-----------------------------------|------------------------------------------------------------|
| node_46: feature_name=cg17537493  | feature_id[2772].value ><br>threshold=0.5825372636318207   |
| node_52: feature_name=cg01683570  | feature_id[110].value ><br>threshold=0.6040188074111938    |
| node_54: feature_name=cg15720017  | feature_id[168].value ><br>threshold=0.7067741453647614    |
| node_60: feature_name=cg23690444  | feature_id[120].value <=<br>threshold=0.16037724912166595  |
| node_61: feature_name=cg00567872  | feature_id[236].value ><br>threshold=0.7005765736103058    |
| node_85: feature_name=cg01014262  | feature_id[764].value <=<br>threshold=0.5737917125225067   |
| node_86: feature_name=cg22946562  | feature_id[1148].value ><br>threshold=0.6328203976154327   |
| node_134: feature_name=cg14514032 | feature_id[202].value <=<br>threshold=0.4389604330062866   |
| node_135: feature_name=cg13488220 | feature_id[241].value ><br>threshold=0.7352153658866882    |
| node_143: feature_name=cg03840920 | feature_id[256].value ><br>threshold=0.502630889415741     |
| node_147: feature_name=cg13634090 | feature_id[822].value ><br>threshold=0.7207068204879761    |
| node_151: feature_name=cg19584674 | feature_id[2364].value <=<br>threshold=0.41758519411087036 |
| node_152: feature_name=cg07344990 | feature_id[411].value ><br>threshold=0.5484964847564697    |
| node_158: feature_name=cg10298992 | feature_id[3066].value ><br>threshold=0.5707973837852478   |
| node_174: feature_name=cg11843516 | feature_id[20].value <=<br>threshold=0.5590928494930267    |
| node_175: feature_name=cg05185926 | feature_id[448].value ><br>threshold=0.17318664491176605   |
| node_177: feature_name=cg17009731 | feature_id[1220].value ><br>threshold=0.6666513085365295   |
| node_179: feature_name=cg01380319 | feature_id[515].value <=<br>threshold=0.39251960813999176  |
| node_180: feature_name=cg20700977 | feature_id[303].value ><br>threshold=0.8422040641307831    |
| node_184: feature_name=cg24259291 | feature_id[164].value ><br>threshold=0.4872268736362457    |
| node_188: feature_name=cg08097657 | feature_id[67].value ><br>threshold=0.3371318429708481     |
| node_190: feature_name=cg07891483 | feature_id[59].value ><br>threshold=0.6211732923984528     |

|                                   |                                                           |
|-----------------------------------|-----------------------------------------------------------|
| node_194: feature_name=cg20122645 | feature_id[275].value ><br>threshold=0.6094755828380585   |
| node_196: feature_name=cg04026354 | feature_id[1763].value <=<br>threshold=0.4341808259487152 |
| node_197: feature_name=cg10149889 | feature_id[1017].value ><br>threshold=0.6150195300579071  |
| node_201: feature_name=cg14890730 | feature_id[337].value <=<br>threshold=0.4372602105140686  |
| node_202: feature_name=cg08331427 | feature_id[132].value ><br>threshold=0.5443233847618103   |
| node_208: feature_name=cg22730007 | feature_id[2544].value ><br>threshold=0.28619489073753357 |
| node_210: feature_name=cg17193551 | feature_id[2057].value ><br>threshold=0.4393353909254074  |
| node_212: feature_name=cg14671764 | feature_id[584].value ><br>threshold=0.9353199899196625   |
| node_268: feature_name=cg21377260 | feature_id[534].value <=<br>threshold=0.9840706288814545  |
| node_269: feature_name=cg27143326 | feature_id[1403].value <=<br>threshold=0.8949433267116547 |
| node_270: feature_name=cg01339351 | feature_id[2694].value <=<br>threshold=0.8992902934551239 |
| node_271: feature_name=cg03407184 | feature_id[3141].value <=<br>threshold=0.7490815222263336 |
| Class: chondrosarcoma (CSA)       |                                                           |
|                                   |                                                           |
| Rules_133                         | passed counts:1                                           |
| node_0: feature_name=cg11915444   | feature_id[1171].value ><br>threshold=0.3402601182460785  |
| node_10: feature_name=cg12109728  | feature_id[2810].value ><br>threshold=0.7068270146846771  |
| node_20: feature_name=cg16412000  | feature_id[789].value ><br>threshold=0.6741803884506226   |
| node_24: feature_name=cg17115147  | feature_id[1434].value <=<br>threshold=0.2961975038051605 |
| node_25: feature_name=cg24474622  | feature_id[2737].value ><br>threshold=0.7211934924125671  |
| node_29: feature_name=cg10472711  | feature_id[612].value ><br>threshold=0.45985929667949677  |
| node_37: feature_name=cg01937669  | feature_id[188].value <=<br>threshold=0.4809463769197464  |
| node_38: feature_name=cg02157052  | feature_id[451].value <=<br>threshold=0.2869153320789337  |

|                                   |                                                            |
|-----------------------------------|------------------------------------------------------------|
| node_39: feature_name=cg18751958  | feature_id[1427].value ><br>threshold=0.4813787043094635   |
| node_41: feature_name=cg22512847  | feature_id[1152].value ><br>threshold=0.5129324495792389   |
| node_43: feature_name=cg23345038  | feature_id[1147].value ><br>threshold=0.6318148374557495   |
| node_45: feature_name=cg17439009  | feature_id[1815].value <=<br>threshold=0.48514117300510406 |
| node_46: feature_name=cg17537493  | feature_id[2772].value ><br>threshold=0.5825372636318207   |
| node_52: feature_name=cg01683570  | feature_id[110].value ><br>threshold=0.6040188074111938    |
| node_54: feature_name=cg15720017  | feature_id[168].value ><br>threshold=0.7067741453647614    |
| node_60: feature_name=cg23690444  | feature_id[120].value <=<br>threshold=0.16037724912166595  |
| node_61: feature_name=cg00567872  | feature_id[236].value ><br>threshold=0.7005765736103058    |
| node_85: feature_name=cg01014262  | feature_id[764].value <=<br>threshold=0.5737917125225067   |
| node_86: feature_name=cg22946562  | feature_id[1148].value ><br>threshold=0.6328203976154327   |
| node_134: feature_name=cg14514032 | feature_id[202].value <=<br>threshold=0.4389604330062866   |
| node_135: feature_name=cg13488220 | feature_id[241].value ><br>threshold=0.7352153658866882    |
| node_143: feature_name=cg03840920 | feature_id[256].value ><br>threshold=0.502630889415741     |
| node_147: feature_name=cg13634090 | feature_id[822].value ><br>threshold=0.7207068204879761    |
| node_151: feature_name=cg19584674 | feature_id[2364].value <=<br>threshold=0.41758519411087036 |
| node_152: feature_name=cg07344990 | feature_id[411].value ><br>threshold=0.5484964847564697    |
| node_158: feature_name=cg10298992 | feature_id[3066].value ><br>threshold=0.5707973837852478   |
| node_174: feature_name=cg11843516 | feature_id[20].value <=<br>threshold=0.5590928494930267    |
| node_175: feature_name=cg05185926 | feature_id[448].value ><br>threshold=0.17318664491176605   |
| node_177: feature_name=cg17009731 | feature_id[1220].value ><br>threshold=0.6666513085365295   |
| node_179: feature_name=cg01380319 | feature_id[515].value <=<br>threshold=0.39251960813999176  |

|                                   |                                                           |
|-----------------------------------|-----------------------------------------------------------|
| node_180: feature_name=cg20700977 | feature_id[303].value ><br>threshold=0.8422040641307831   |
| node_184: feature_name=cg24259291 | feature_id[164].value ><br>threshold=0.4872268736362457   |
| node_188: feature_name=cg08097657 | feature_id[67].value ><br>threshold=0.3371318429708481    |
| node_190: feature_name=cg07891483 | feature_id[59].value ><br>threshold=0.6211732923984528    |
| node_194: feature_name=cg20122645 | feature_id[275].value ><br>threshold=0.6094755828380585   |
| node_196: feature_name=cg04026354 | feature_id[1763].value <=<br>threshold=0.4341808259487152 |
| node_197: feature_name=cg10149889 | feature_id[1017].value ><br>threshold=0.6150195300579071  |
| node_201: feature_name=cg14890730 | feature_id[337].value <=<br>threshold=0.4372602105140686  |
| node_202: feature_name=cg08331427 | feature_id[132].value ><br>threshold=0.5443233847618103   |
| node_208: feature_name=cg22730007 | feature_id[2544].value ><br>threshold=0.28619489073753357 |
| node_210: feature_name=cg17193551 | feature_id[2057].value ><br>threshold=0.4393353909254074  |
| node_212: feature_name=cg14671764 | feature_id[584].value <=<br>threshold=0.9353199899196625  |
| node_213: feature_name=cg20140662 | feature_id[2044].value ><br>threshold=0.38030287623405457 |
| node_215: feature_name=cg07891483 | feature_id[59].value ><br>threshold=0.829958975315094     |
| node_219: feature_name=cg04884579 | feature_id[1861].value ><br>threshold=0.6106154918670654  |
| node_229: feature_name=cg19548524 | feature_id[2985].value ><br>threshold=0.8623353838920593  |
| node_233: feature_name=cg14788686 | feature_id[3556].value ><br>threshold=0.35090239346027374 |
| node_235: feature_name=cg05380734 | feature_id[2470].value <=<br>threshold=0.7112160623073578 |
| node_236: feature_name=cg01166827 | feature_id[3708].value ><br>threshold=0.6359498500823975  |
| node_238: feature_name=cg13251842 | feature_id[714].value ><br>threshold=0.8916542232036591   |
| node_240: feature_name=cg02829279 | feature_id[623].value ><br>threshold=0.450528159737587    |
| node_242: feature_name=cg24358599 | feature_id[86].value ><br>threshold=0.8132582604885101    |

|                                                          |                                                           |
|----------------------------------------------------------|-----------------------------------------------------------|
| node_246: feature_name=cg05544807                        | feature_id[3661].value <=<br>threshold=0.6726464331150055 |
| node_247: feature_name=cg05056653                        | feature_id[3122].value ><br>threshold=0.35445791482925415 |
| node_249: feature_name=cg26308909                        | feature_id[770].value ><br>threshold=0.3754204213619232   |
| node_251: feature_name=cg11197908                        | feature_id[3058].value ><br>threshold=0.36795753240585327 |
| node_253: feature_name=cg00039385                        | feature_id[646].value <=<br>threshold=0.18521490693092346 |
| node_254: feature_name=cg04787317                        | feature_id[3379].value ><br>threshold=0.8155552744865417  |
| node_256: feature_name=cg00169184                        | feature_id[2503].value ><br>threshold=0.9175277948379517  |
| node_258: feature_name=cg11546709                        | feature_id[966].value ><br>threshold=0.3400330990552902   |
| node_260: feature_name=cg17276624                        | feature_id[1163].value ><br>threshold=0.8622665405273438  |
| node_262: feature_name=cg18628371                        | feature_id[3240].value ><br>threshold=0.598172664642334   |
| Class: high-grade endometrial stromal sarcoma (ESS (HG)) |                                                           |
|                                                          |                                                           |
| Rules_134                                                | passed counts:1                                           |
| node_0: feature_name=cg11915444                          | feature_id[1171].value ><br>threshold=0.3402601182460785  |
| node_10: feature_name=cg12109728                         | feature_id[2810].value ><br>threshold=0.7068270146846771  |
| node_20: feature_name=cg16412000                         | feature_id[789].value ><br>threshold=0.6741803884506226   |
| node_24: feature_name=cg17115147                         | feature_id[1434].value <=<br>threshold=0.2961975038051605 |
| node_25: feature_name=cg24474622                         | feature_id[2737].value ><br>threshold=0.7211934924125671  |
| node_29: feature_name=cg10472711                         | feature_id[612].value ><br>threshold=0.45985929667949677  |
| node_37: feature_name=cg01937669                         | feature_id[188].value <=<br>threshold=0.4809463769197464  |
| node_38: feature_name=cg02157052                         | feature_id[451].value <=<br>threshold=0.2869153320789337  |
| node_39: feature_name=cg18751958                         | feature_id[1427].value ><br>threshold=0.4813787043094635  |

|                                   |                                                            |
|-----------------------------------|------------------------------------------------------------|
| node_41: feature_name=cg22512847  | feature_id[1152].value ><br>threshold=0.5129324495792389   |
| node_43: feature_name=cg23345038  | feature_id[1147].value ><br>threshold=0.6318148374557495   |
| node_45: feature_name=cg17439009  | feature_id[1815].value <=<br>threshold=0.48514117300510406 |
| node_46: feature_name=cg17537493  | feature_id[2772].value ><br>threshold=0.5825372636318207   |
| node_52: feature_name=cg01683570  | feature_id[110].value ><br>threshold=0.6040188074111938    |
| node_54: feature_name=cg15720017  | feature_id[168].value ><br>threshold=0.7067741453647614    |
| node_60: feature_name=cg23690444  | feature_id[120].value <=<br>threshold=0.16037724912166595  |
| node_61: feature_name=cg00567872  | feature_id[236].value ><br>threshold=0.7005765736103058    |
| node_85: feature_name=cg01014262  | feature_id[764].value <=<br>threshold=0.5737917125225067   |
| node_86: feature_name=cg22946562  | feature_id[1148].value ><br>threshold=0.6328203976154327   |
| node_134: feature_name=cg14514032 | feature_id[202].value <=<br>threshold=0.4389604330062866   |
| node_135: feature_name=cg13488220 | feature_id[241].value ><br>threshold=0.7352153658866882    |
| node_143: feature_name=cg03840920 | feature_id[256].value ><br>threshold=0.502630889415741     |
| node_147: feature_name=cg13634090 | feature_id[822].value ><br>threshold=0.7207068204879761    |
| node_151: feature_name=cg19584674 | feature_id[2364].value <=<br>threshold=0.41758519411087036 |
| node_152: feature_name=cg07344990 | feature_id[411].value ><br>threshold=0.5484964847564697    |
| node_158: feature_name=cg10298992 | feature_id[3066].value ><br>threshold=0.5707973837852478   |
| node_174: feature_name=cg11843516 | feature_id[20].value <=<br>threshold=0.5590928494930267    |
| node_175: feature_name=cg05185926 | feature_id[448].value ><br>threshold=0.17318664491176605   |
| node_177: feature_name=cg17009731 | feature_id[1220].value ><br>threshold=0.6666513085365295   |
| node_179: feature_name=cg01380319 | feature_id[515].value <=<br>threshold=0.39251960813999176  |
| node_180: feature_name=cg20700977 | feature_id[303].value ><br>threshold=0.8422040641307831    |



|                                   |                                                           |
|-----------------------------------|-----------------------------------------------------------|
| node_184: feature_name=cg24259291 | feature_id[164].value ><br>threshold=0.4872268736362457   |
| node_188: feature_name=cg08097657 | feature_id[67].value ><br>threshold=0.3371318429708481    |
| node_190: feature_name=cg07891483 | feature_id[59].value ><br>threshold=0.6211732923984528    |
| node_194: feature_name=cg20122645 | feature_id[275].value ><br>threshold=0.6094755828380585   |
| node_196: feature_name=cg04026354 | feature_id[1763].value <=<br>threshold=0.4341808259487152 |
| node_197: feature_name=cg10149889 | feature_id[1017].value ><br>threshold=0.6150195300579071  |
| node_201: feature_name=cg14890730 | feature_id[337].value <=<br>threshold=0.4372602105140686  |
| node_202: feature_name=cg08331427 | feature_id[132].value ><br>threshold=0.5443233847618103   |
| node_208: feature_name=cg22730007 | feature_id[2544].value ><br>threshold=0.28619489073753357 |
| node_210: feature_name=cg17193551 | feature_id[2057].value ><br>threshold=0.4393353909254074  |
| node_212: feature_name=cg14671764 | feature_id[584].value <=<br>threshold=0.9353199899196625  |
| node_213: feature_name=cg20140662 | feature_id[2044].value ><br>threshold=0.38030287623405457 |
| node_215: feature_name=cg07891483 | feature_id[59].value ><br>threshold=0.829958975315094     |
| node_219: feature_name=cg04884579 | feature_id[1861].value ><br>threshold=0.6106154918670654  |
| node_229: feature_name=cg19548524 | feature_id[2985].value ><br>threshold=0.8623353838920593  |
| node_233: feature_name=cg14788686 | feature_id[3556].value ><br>threshold=0.35090239346027374 |
| node_235: feature_name=cg05380734 | feature_id[2470].value <=<br>threshold=0.7112160623073578 |
| node_236: feature_name=cg01166827 | feature_id[3708].value ><br>threshold=0.6359498500823975  |
| node_238: feature_name=cg13251842 | feature_id[714].value ><br>threshold=0.8916542232036591   |
| node_240: feature_name=cg02829279 | feature_id[623].value ><br>threshold=0.450528159737587    |
| node_242: feature_name=cg24358599 | feature_id[86].value ><br>threshold=0.8132582604885101    |
| node_246: feature_name=cg05544807 | feature_id[3661].value <=<br>threshold=0.6726464331150055 |

|                                   |                                                           |
|-----------------------------------|-----------------------------------------------------------|
| node_247: feature_name=cg05056653 | feature_id[3122].value ><br>threshold=0.35445791482925415 |
| node_249: feature_name=cg26308909 | feature_id[770].value ><br>threshold=0.3754204213619232   |
| node_251: feature_name=cg11197908 | feature_id[3058].value ><br>threshold=0.36795753240585327 |
| node_253: feature_name=cg00039385 | feature_id[646].value <=<br>threshold=0.18521490693092346 |
| node_254: feature_name=cg04787317 | feature_id[3379].value ><br>threshold=0.8155552744865417  |
| node_256: feature_name=cg00169184 | feature_id[2503].value ><br>threshold=0.9175277948379517  |
| node_258: feature_name=cg11546709 | feature_id[966].value ><br>threshold=0.3400330990552902   |
| node_260: feature_name=cg17276624 | feature_id[1163].value ><br>threshold=0.8622665405273438  |
| node_262: feature_name=cg18628371 | feature_id[3240].value <=<br>threshold=0.598172664642334  |
| Class: sarcoma (SARC)             |                                                           |
|                                   |                                                           |
| Rules_135                         | passed counts:1                                           |
| node_0: feature_name=cg11915444   | feature_id[1171].value ><br>threshold=0.3402601182460785  |
| node_10: feature_name=cg12109728  | feature_id[2810].value ><br>threshold=0.7068270146846771  |
| node_20: feature_name=cg16412000  | feature_id[789].value ><br>threshold=0.6741803884506226   |
| node_24: feature_name=cg17115147  | feature_id[1434].value <=<br>threshold=0.2961975038051605 |
| node_25: feature_name=cg24474622  | feature_id[2737].value ><br>threshold=0.7211934924125671  |
| node_29: feature_name=cg10472711  | feature_id[612].value ><br>threshold=0.45985929667949677  |
| node_37: feature_name=cg01937669  | feature_id[188].value <=<br>threshold=0.4809463769197464  |
| node_38: feature_name=cg02157052  | feature_id[451].value <=<br>threshold=0.2869153320789337  |
| node_39: feature_name=cg18751958  | feature_id[1427].value ><br>threshold=0.4813787043094635  |
| node_41: feature_name=cg22512847  | feature_id[1152].value ><br>threshold=0.5129324495792389  |
| node_43: feature_name=cg23345038  | feature_id[1147].value ><br>threshold=0.6318148374557495  |

|                                   |                                                            |
|-----------------------------------|------------------------------------------------------------|
| node_45: feature_name=cg17439009  | feature_id[1815].value <=<br>threshold=0.48514117300510406 |
| node_46: feature_name=cg17537493  | feature_id[2772].value ><br>threshold=0.5825372636318207   |
| node_52: feature_name=cg01683570  | feature_id[110].value ><br>threshold=0.6040188074111938    |
| node_54: feature_name=cg15720017  | feature_id[168].value ><br>threshold=0.7067741453647614    |
| node_60: feature_name=cg23690444  | feature_id[120].value <=<br>threshold=0.16037724912166595  |
| node_61: feature_name=cg00567872  | feature_id[236].value ><br>threshold=0.7005765736103058    |
| node_85: feature_name=cg01014262  | feature_id[764].value <=<br>threshold=0.5737917125225067   |
| node_86: feature_name=cg22946562  | feature_id[1148].value ><br>threshold=0.6328203976154327   |
| node_134: feature_name=cg14514032 | feature_id[202].value <=<br>threshold=0.4389604330062866   |
| node_135: feature_name=cg13488220 | feature_id[241].value ><br>threshold=0.7352153658866882    |
| node_143: feature_name=cg03840920 | feature_id[256].value ><br>threshold=0.502630889415741     |
| node_147: feature_name=cg13634090 | feature_id[822].value ><br>threshold=0.7207068204879761    |
| node_151: feature_name=cg19584674 | feature_id[2364].value <=<br>threshold=0.41758519411087036 |
| node_152: feature_name=cg07344990 | feature_id[411].value ><br>threshold=0.5484964847564697    |
| node_158: feature_name=cg10298992 | feature_id[3066].value ><br>threshold=0.5707973837852478   |
| node_174: feature_name=cg11843516 | feature_id[20].value <=<br>threshold=0.5590928494930267    |
| node_175: feature_name=cg05185926 | feature_id[448].value ><br>threshold=0.17318664491176605   |
| node_177: feature_name=cg17009731 | feature_id[1220].value ><br>threshold=0.6666513085365295   |
| node_179: feature_name=cg01380319 | feature_id[515].value <=<br>threshold=0.39251960813999176  |
| node_180: feature_name=cg20700977 | feature_id[303].value ><br>threshold=0.8422040641307831    |
| node_184: feature_name=cg24259291 | feature_id[164].value ><br>threshold=0.4872268736362457    |
| node_188: feature_name=cg08097657 | feature_id[67].value ><br>threshold=0.3371318429708481     |

|                                   |                                                           |
|-----------------------------------|-----------------------------------------------------------|
| node_190: feature_name=cg07891483 | feature_id[59].value ><br>threshold=0.6211732923984528    |
| node_194: feature_name=cg20122645 | feature_id[275].value ><br>threshold=0.6094755828380585   |
| node_196: feature_name=cg04026354 | feature_id[1763].value <=<br>threshold=0.4341808259487152 |
| node_197: feature_name=cg10149889 | feature_id[1017].value ><br>threshold=0.6150195300579071  |
| node_201: feature_name=cg14890730 | feature_id[337].value <=<br>threshold=0.4372602105140686  |
| node_202: feature_name=cg08331427 | feature_id[132].value ><br>threshold=0.5443233847618103   |
| node_208: feature_name=cg22730007 | feature_id[2544].value ><br>threshold=0.28619489073753357 |
| node_210: feature_name=cg17193551 | feature_id[2057].value ><br>threshold=0.4393353909254074  |
| node_212: feature_name=cg14671764 | feature_id[584].value <=<br>threshold=0.9353199899196625  |
| node_213: feature_name=cg20140662 | feature_id[2044].value ><br>threshold=0.38030287623405457 |
| node_215: feature_name=cg07891483 | feature_id[59].value ><br>threshold=0.829958975315094     |
| node_219: feature_name=cg04884579 | feature_id[1861].value ><br>threshold=0.6106154918670654  |
| node_229: feature_name=cg19548524 | feature_id[2985].value ><br>threshold=0.8623353838920593  |
| node_233: feature_name=cg14788686 | feature_id[3556].value ><br>threshold=0.35090239346027374 |
| node_235: feature_name=cg05380734 | feature_id[2470].value <=<br>threshold=0.7112160623073578 |
| node_236: feature_name=cg01166827 | feature_id[3708].value ><br>threshold=0.6359498500823975  |
| node_238: feature_name=cg13251842 | feature_id[714].value ><br>threshold=0.8916542232036591   |
| node_240: feature_name=cg02829279 | feature_id[623].value ><br>threshold=0.450528159737587    |
| node_242: feature_name=cg24358599 | feature_id[86].value ><br>threshold=0.8132582604885101    |
| node_246: feature_name=cg05544807 | feature_id[3661].value <=<br>threshold=0.6726464331150055 |
| node_247: feature_name=cg05056653 | feature_id[3122].value ><br>threshold=0.35445791482925415 |
| node_249: feature_name=cg26308909 | feature_id[770].value ><br>threshold=0.3754204213619232   |

|                                   |                                                            |
|-----------------------------------|------------------------------------------------------------|
| node_251: feature_name=cg11197908 | feature_id[3058].value ><br>threshold=0.36795753240585327  |
| node_253: feature_name=cg00039385 | feature_id[646].value <=<br>threshold=0.18521490693092346  |
| node_254: feature_name=cg04787317 | feature_id[3379].value ><br>threshold=0.8155552744865417   |
| node_256: feature_name=cg00169184 | feature_id[2503].value ><br>threshold=0.9175277948379517   |
| node_258: feature_name=cg11546709 | feature_id[966].value ><br>threshold=0.3400330990552902    |
| node_260: feature_name=cg17276624 | feature_id[1163].value <=<br>threshold=0.8622665405273438  |
| Class: epithelioid sarcoma (ES)   |                                                            |
|                                   |                                                            |
| Rules_136                         | passed counts:1                                            |
| node_0: feature_name=cg11915444   | feature_id[1171].value ><br>threshold=0.3402601182460785   |
| node_10: feature_name=cg12109728  | feature_id[2810].value ><br>threshold=0.7068270146846771   |
| node_20: feature_name=cg16412000  | feature_id[789].value ><br>threshold=0.6741803884506226    |
| node_24: feature_name=cg17115147  | feature_id[1434].value <=<br>threshold=0.2961975038051605  |
| node_25: feature_name=cg24474622  | feature_id[2737].value ><br>threshold=0.7211934924125671   |
| node_29: feature_name=cg10472711  | feature_id[612].value ><br>threshold=0.45985929667949677   |
| node_37: feature_name=cg01937669  | feature_id[188].value <=<br>threshold=0.4809463769197464   |
| node_38: feature_name=cg02157052  | feature_id[451].value <=<br>threshold=0.2869153320789337   |
| node_39: feature_name=cg18751958  | feature_id[1427].value ><br>threshold=0.4813787043094635   |
| node_41: feature_name=cg22512847  | feature_id[1152].value ><br>threshold=0.5129324495792389   |
| node_43: feature_name=cg23345038  | feature_id[1147].value ><br>threshold=0.6318148374557495   |
| node_45: feature_name=cg17439009  | feature_id[1815].value <=<br>threshold=0.48514117300510406 |
| node_46: feature_name=cg17537493  | feature_id[2772].value ><br>threshold=0.5825372636318207   |
| node_52: feature_name=cg01683570  | feature_id[110].value ><br>threshold=0.6040188074111938    |

|                                   |                                                            |
|-----------------------------------|------------------------------------------------------------|
| node_54: feature_name=cg15720017  | feature_id[168].value ><br>threshold=0.7067741453647614    |
| node_60: feature_name=cg23690444  | feature_id[120].value <=<br>threshold=0.16037724912166595  |
| node_61: feature_name=cg00567872  | feature_id[236].value ><br>threshold=0.7005765736103058    |
| node_85: feature_name=cg01014262  | feature_id[764].value <=<br>threshold=0.5737917125225067   |
| node_86: feature_name=cg22946562  | feature_id[1148].value ><br>threshold=0.6328203976154327   |
| node_134: feature_name=cg14514032 | feature_id[202].value <=<br>threshold=0.4389604330062866   |
| node_135: feature_name=cg13488220 | feature_id[241].value ><br>threshold=0.7352153658866882    |
| node_143: feature_name=cg03840920 | feature_id[256].value ><br>threshold=0.502630889415741     |
| node_147: feature_name=cg13634090 | feature_id[822].value ><br>threshold=0.7207068204879761    |
| node_151: feature_name=cg19584674 | feature_id[2364].value <=<br>threshold=0.41758519411087036 |
| node_152: feature_name=cg07344990 | feature_id[411].value ><br>threshold=0.5484964847564697    |
| node_158: feature_name=cg10298992 | feature_id[3066].value ><br>threshold=0.5707973837852478   |
| node_174: feature_name=cg11843516 | feature_id[20].value <=<br>threshold=0.5590928494930267    |
| node_175: feature_name=cg05185926 | feature_id[448].value ><br>threshold=0.17318664491176605   |
| node_177: feature_name=cg17009731 | feature_id[1220].value ><br>threshold=0.6666513085365295   |
| node_179: feature_name=cg01380319 | feature_id[515].value <=<br>threshold=0.39251960813999176  |
| node_180: feature_name=cg20700977 | feature_id[303].value ><br>threshold=0.8422040641307831    |
| node_184: feature_name=cg24259291 | feature_id[164].value ><br>threshold=0.4872268736362457    |
| node_188: feature_name=cg08097657 | feature_id[67].value ><br>threshold=0.3371318429708481     |
| node_190: feature_name=cg07891483 | feature_id[59].value ><br>threshold=0.6211732923984528     |
| node_194: feature_name=cg20122645 | feature_id[275].value ><br>threshold=0.6094755828380585    |
| node_196: feature_name=cg04026354 | feature_id[1763].value <=<br>threshold=0.4341808259487152  |

|                                   |                                                           |
|-----------------------------------|-----------------------------------------------------------|
| node_197: feature_name=cg10149889 | feature_id[1017].value ><br>threshold=0.6150195300579071  |
| node_201: feature_name=cg14890730 | feature_id[337].value <=<br>threshold=0.4372602105140686  |
| node_202: feature_name=cg08331427 | feature_id[132].value ><br>threshold=0.5443233847618103   |
| node_208: feature_name=cg22730007 | feature_id[2544].value ><br>threshold=0.28619489073753357 |
| node_210: feature_name=cg17193551 | feature_id[2057].value ><br>threshold=0.4393353909254074  |
| node_212: feature_name=cg14671764 | feature_id[584].value <=<br>threshold=0.9353199899196625  |
| node_213: feature_name=cg20140662 | feature_id[2044].value ><br>threshold=0.38030287623405457 |
| node_215: feature_name=cg07891483 | feature_id[59].value ><br>threshold=0.829958975315094     |
| node_219: feature_name=cg04884579 | feature_id[1861].value ><br>threshold=0.6106154918670654  |
| node_229: feature_name=cg19548524 | feature_id[2985].value ><br>threshold=0.8623353838920593  |
| node_233: feature_name=cg14788686 | feature_id[3556].value ><br>threshold=0.35090239346027374 |
| node_235: feature_name=cg05380734 | feature_id[2470].value <=<br>threshold=0.7112160623073578 |
| node_236: feature_name=cg01166827 | feature_id[3708].value ><br>threshold=0.6359498500823975  |
| node_238: feature_name=cg13251842 | feature_id[714].value ><br>threshold=0.8916542232036591   |
| node_240: feature_name=cg02829279 | feature_id[623].value ><br>threshold=0.450528159737587    |
| node_242: feature_name=cg24358599 | feature_id[86].value ><br>threshold=0.8132582604885101    |
| node_246: feature_name=cg05544807 | feature_id[3661].value <=<br>threshold=0.6726464331150055 |
| node_247: feature_name=cg05056653 | feature_id[3122].value ><br>threshold=0.35445791482925415 |
| node_249: feature_name=cg26308909 | feature_id[770].value ><br>threshold=0.3754204213619232   |
| node_251: feature_name=cg11197908 | feature_id[3058].value ><br>threshold=0.36795753240585327 |
| node_253: feature_name=cg00039385 | feature_id[646].value <=<br>threshold=0.18521490693092346 |
| node_254: feature_name=cg04787317 | feature_id[3379].value ><br>threshold=0.8155552744865417  |

|                                             |                                                            |
|---------------------------------------------|------------------------------------------------------------|
| node_256: feature_name=cg00169184           | feature_id[2503].value ><br>threshold=0.9175277948379517   |
| node_258: feature_name=cg11546709           | feature_id[966].value <=<br>threshold=0.3400330990552902   |
| Class: small blue round cell tumour (SBRCT) |                                                            |
| Rules_137                                   | passed counts:1                                            |
| node_0: feature_name=cg11915444             | feature_id[1171].value ><br>threshold=0.3402601182460785   |
| node_10: feature_name=cg12109728            | feature_id[2810].value ><br>threshold=0.7068270146846771   |
| node_20: feature_name=cg16412000            | feature_id[789].value ><br>threshold=0.6741803884506226    |
| node_24: feature_name=cg17115147            | feature_id[1434].value <=<br>threshold=0.2961975038051605  |
| node_25: feature_name=cg24474622            | feature_id[2737].value ><br>threshold=0.7211934924125671   |
| node_29: feature_name=cg10472711            | feature_id[612].value ><br>threshold=0.45985929667949677   |
| node_37: feature_name=cg01937669            | feature_id[188].value <=<br>threshold=0.4809463769197464   |
| node_38: feature_name=cg02157052            | feature_id[451].value <=<br>threshold=0.2869153320789337   |
| node_39: feature_name=cg18751958            | feature_id[1427].value ><br>threshold=0.4813787043094635   |
| node_41: feature_name=cg22512847            | feature_id[1152].value ><br>threshold=0.5129324495792389   |
| node_43: feature_name=cg23345038            | feature_id[1147].value ><br>threshold=0.6318148374557495   |
| node_45: feature_name=cg17439009            | feature_id[1815].value <=<br>threshold=0.48514117300510406 |
| node_46: feature_name=cg17537493            | feature_id[2772].value ><br>threshold=0.5825372636318207   |
| node_52: feature_name=cg01683570            | feature_id[110].value ><br>threshold=0.6040188074111938    |
| node_54: feature_name=cg15720017            | feature_id[168].value ><br>threshold=0.7067741453647614    |
| node_60: feature_name=cg23690444            | feature_id[120].value <=<br>threshold=0.16037724912166595  |
| node_61: feature_name=cg00567872            | feature_id[236].value ><br>threshold=0.7005765736103058    |
| node_85: feature_name=cg01014262            | feature_id[764].value <=<br>threshold=0.5737917125225067   |



|                                   |                                                            |
|-----------------------------------|------------------------------------------------------------|
| node_86: feature_name=cg22946562  | feature_id[1148].value ><br>threshold=0.6328203976154327   |
| node_134: feature_name=cg14514032 | feature_id[202].value <=<br>threshold=0.4389604330062866   |
| node_135: feature_name=cg13488220 | feature_id[241].value ><br>threshold=0.7352153658866882    |
| node_143: feature_name=cg03840920 | feature_id[256].value ><br>threshold=0.502630889415741     |
| node_147: feature_name=cg13634090 | feature_id[822].value ><br>threshold=0.7207068204879761    |
| node_151: feature_name=cg19584674 | feature_id[2364].value <=<br>threshold=0.41758519411087036 |
| node_152: feature_name=cg07344990 | feature_id[411].value ><br>threshold=0.5484964847564697    |
| node_158: feature_name=cg10298992 | feature_id[3066].value ><br>threshold=0.5707973837852478   |
| node_174: feature_name=cg11843516 | feature_id[20].value <=<br>threshold=0.5590928494930267    |
| node_175: feature_name=cg05185926 | feature_id[448].value ><br>threshold=0.17318664491176605   |
| node_177: feature_name=cg17009731 | feature_id[1220].value ><br>threshold=0.6666513085365295   |
| node_179: feature_name=cg01380319 | feature_id[515].value <=<br>threshold=0.39251960813999176  |
| node_180: feature_name=cg20700977 | feature_id[303].value ><br>threshold=0.8422040641307831    |
| node_184: feature_name=cg24259291 | feature_id[164].value ><br>threshold=0.4872268736362457    |
| node_188: feature_name=cg08097657 | feature_id[67].value ><br>threshold=0.3371318429708481     |
| node_190: feature_name=cg07891483 | feature_id[59].value ><br>threshold=0.6211732923984528     |
| node_194: feature_name=cg20122645 | feature_id[275].value ><br>threshold=0.6094755828380585    |
| node_196: feature_name=cg04026354 | feature_id[1763].value <=<br>threshold=0.4341808259487152  |
| node_197: feature_name=cg10149889 | feature_id[1017].value ><br>threshold=0.6150195300579071   |
| node_201: feature_name=cg14890730 | feature_id[337].value <=<br>threshold=0.4372602105140686   |
| node_202: feature_name=cg08331427 | feature_id[132].value ><br>threshold=0.5443233847618103    |
| node_208: feature_name=cg22730007 | feature_id[2544].value ><br>threshold=0.28619489073753357  |

|                                   |                                                           |
|-----------------------------------|-----------------------------------------------------------|
| node_210: feature_name=cg17193551 | feature_id[2057].value ><br>threshold=0.4393353909254074  |
| node_212: feature_name=cg14671764 | feature_id[584].value <=<br>threshold=0.9353199899196625  |
| node_213: feature_name=cg20140662 | feature_id[2044].value ><br>threshold=0.38030287623405457 |
| node_215: feature_name=cg07891483 | feature_id[59].value ><br>threshold=0.829958975315094     |
| node_219: feature_name=cg04884579 | feature_id[1861].value ><br>threshold=0.6106154918670654  |
| node_229: feature_name=cg19548524 | feature_id[2985].value ><br>threshold=0.8623353838920593  |
| node_233: feature_name=cg14788686 | feature_id[3556].value ><br>threshold=0.35090239346027374 |
| node_235: feature_name=cg05380734 | feature_id[2470].value <=<br>threshold=0.7112160623073578 |
| node_236: feature_name=cg01166827 | feature_id[3708].value ><br>threshold=0.6359498500823975  |
| node_238: feature_name=cg13251842 | feature_id[714].value ><br>threshold=0.8916542232036591   |
| node_240: feature_name=cg02829279 | feature_id[623].value ><br>threshold=0.450528159737587    |
| node_242: feature_name=cg24358599 | feature_id[86].value ><br>threshold=0.8132582604885101    |
| node_246: feature_name=cg05544807 | feature_id[3661].value <=<br>threshold=0.6726464331150055 |
| node_247: feature_name=cg05056653 | feature_id[3122].value ><br>threshold=0.35445791482925415 |
| node_249: feature_name=cg26308909 | feature_id[770].value ><br>threshold=0.3754204213619232   |
| node_251: feature_name=cg11197908 | feature_id[3058].value ><br>threshold=0.36795753240585327 |
| node_253: feature_name=cg00039385 | feature_id[646].value <=<br>threshold=0.18521490693092346 |
| node_254: feature_name=cg04787317 | feature_id[3379].value ><br>threshold=0.8155552744865417  |
| node_256: feature_name=cg00169184 | feature_id[2503].value <=<br>threshold=0.9175277948379517 |
| Class: chordoma (CHORD)           |                                                           |
| Rules_138                         | passed counts:1                                           |
| node_0: feature_name=cg11915444   | feature_id[1171].value ><br>threshold=0.3402601182460785  |

|                                   |                                                            |
|-----------------------------------|------------------------------------------------------------|
| node_10: feature_name=cg12109728  | feature_id[2810].value ><br>threshold=0.7068270146846771   |
| node_20: feature_name=cg16412000  | feature_id[789].value ><br>threshold=0.6741803884506226    |
| node_24: feature_name=cg17115147  | feature_id[1434].value <=<br>threshold=0.2961975038051605  |
| node_25: feature_name=cg24474622  | feature_id[2737].value ><br>threshold=0.7211934924125671   |
| node_29: feature_name=cg10472711  | feature_id[612].value ><br>threshold=0.45985929667949677   |
| node_37: feature_name=cg01937669  | feature_id[188].value <=<br>threshold=0.4809463769197464   |
| node_38: feature_name=cg02157052  | feature_id[451].value <=<br>threshold=0.2869153320789337   |
| node_39: feature_name=cg18751958  | feature_id[1427].value ><br>threshold=0.4813787043094635   |
| node_41: feature_name=cg22512847  | feature_id[1152].value ><br>threshold=0.5129324495792389   |
| node_43: feature_name=cg23345038  | feature_id[1147].value ><br>threshold=0.6318148374557495   |
| node_45: feature_name=cg17439009  | feature_id[1815].value <=<br>threshold=0.48514117300510406 |
| node_46: feature_name=cg17537493  | feature_id[2772].value ><br>threshold=0.5825372636318207   |
| node_52: feature_name=cg01683570  | feature_id[110].value ><br>threshold=0.6040188074111938    |
| node_54: feature_name=cg15720017  | feature_id[168].value ><br>threshold=0.7067741453647614    |
| node_60: feature_name=cg23690444  | feature_id[120].value <=<br>threshold=0.16037724912166595  |
| node_61: feature_name=cg00567872  | feature_id[236].value ><br>threshold=0.7005765736103058    |
| node_85: feature_name=cg01014262  | feature_id[764].value <=<br>threshold=0.5737917125225067   |
| node_86: feature_name=cg22946562  | feature_id[1148].value ><br>threshold=0.6328203976154327   |
| node_134: feature_name=cg14514032 | feature_id[202].value <=<br>threshold=0.4389604330062866   |
| node_135: feature_name=cg13488220 | feature_id[241].value ><br>threshold=0.7352153658866882    |
| node_143: feature_name=cg03840920 | feature_id[256].value ><br>threshold=0.502630889415741     |
| node_147: feature_name=cg13634090 | feature_id[822].value ><br>threshold=0.7207068204879761    |

|                                   |                                                            |
|-----------------------------------|------------------------------------------------------------|
| node_151: feature_name=cg19584674 | feature_id[2364].value <=<br>threshold=0.41758519411087036 |
| node_152: feature_name=cg07344990 | feature_id[411].value ><br>threshold=0.5484964847564697    |
| node_158: feature_name=cg10298992 | feature_id[3066].value ><br>threshold=0.5707973837852478   |
| node_174: feature_name=cg11843516 | feature_id[20].value <=<br>threshold=0.5590928494930267    |
| node_175: feature_name=cg05185926 | feature_id[448].value ><br>threshold=0.17318664491176605   |
| node_177: feature_name=cg17009731 | feature_id[1220].value ><br>threshold=0.6666513085365295   |
| node_179: feature_name=cg01380319 | feature_id[515].value <=<br>threshold=0.39251960813999176  |
| node_180: feature_name=cg20700977 | feature_id[303].value ><br>threshold=0.8422040641307831    |
| node_184: feature_name=cg24259291 | feature_id[164].value ><br>threshold=0.4872268736362457    |
| node_188: feature_name=cg08097657 | feature_id[67].value ><br>threshold=0.3371318429708481     |
| node_190: feature_name=cg07891483 | feature_id[59].value ><br>threshold=0.6211732923984528     |
| node_194: feature_name=cg20122645 | feature_id[275].value ><br>threshold=0.6094755828380585    |
| node_196: feature_name=cg04026354 | feature_id[1763].value <=<br>threshold=0.4341808259487152  |
| node_197: feature_name=cg10149889 | feature_id[1017].value ><br>threshold=0.6150195300579071   |
| node_201: feature_name=cg14890730 | feature_id[337].value <=<br>threshold=0.4372602105140686   |
| node_202: feature_name=cg08331427 | feature_id[132].value ><br>threshold=0.5443233847618103    |
| node_208: feature_name=cg22730007 | feature_id[2544].value ><br>threshold=0.28619489073753357  |
| node_210: feature_name=cg17193551 | feature_id[2057].value ><br>threshold=0.4393353909254074   |
| node_212: feature_name=cg14671764 | feature_id[584].value <=<br>threshold=0.9353199899196625   |
| node_213: feature_name=cg20140662 | feature_id[2044].value ><br>threshold=0.38030287623405457  |
| node_215: feature_name=cg07891483 | feature_id[59].value ><br>threshold=0.829958975315094      |
| node_219: feature_name=cg04884579 | feature_id[1861].value ><br>threshold=0.6106154918670654   |

|                                   |                                                            |
|-----------------------------------|------------------------------------------------------------|
| node_229: feature_name=cg19548524 | feature_id[2985].value ><br>threshold=0.8623353838920593   |
| node_233: feature_name=cg14788686 | feature_id[3556].value ><br>threshold=0.35090239346027374  |
| node_235: feature_name=cg05380734 | feature_id[2470].value <=<br>threshold=0.7112160623073578  |
| node_236: feature_name=cg01166827 | feature_id[3708].value ><br>threshold=0.6359498500823975   |
| node_238: feature_name=cg13251842 | feature_id[714].value ><br>threshold=0.8916542232036591    |
| node_240: feature_name=cg02829279 | feature_id[623].value ><br>threshold=0.450528159737587     |
| node_242: feature_name=cg24358599 | feature_id[86].value <=<br>threshold=0.8132582604885101    |
| node_243: feature_name=cg01824933 | feature_id[300].value <=<br>threshold=0.5986265540122986   |
| Class: angiosarcoma (AS)          |                                                            |
| Rules_139                         | passed counts:1                                            |
| node_0: feature_name=cg11915444   | feature_id[1171].value ><br>threshold=0.3402601182460785   |
| node_10: feature_name=cg12109728  | feature_id[2810].value ><br>threshold=0.7068270146846771   |
| node_20: feature_name=cg16412000  | feature_id[789].value ><br>threshold=0.6741803884506226    |
| node_24: feature_name=cg17115147  | feature_id[1434].value <=<br>threshold=0.2961975038051605  |
| node_25: feature_name=cg24474622  | feature_id[2737].value ><br>threshold=0.7211934924125671   |
| node_29: feature_name=cg10472711  | feature_id[612].value ><br>threshold=0.45985929667949677   |
| node_37: feature_name=cg01937669  | feature_id[188].value <=<br>threshold=0.4809463769197464   |
| node_38: feature_name=cg02157052  | feature_id[451].value <=<br>threshold=0.2869153320789337   |
| node_39: feature_name=cg18751958  | feature_id[1427].value ><br>threshold=0.4813787043094635   |
| node_41: feature_name=cg22512847  | feature_id[1152].value ><br>threshold=0.5129324495792389   |
| node_43: feature_name=cg23345038  | feature_id[1147].value ><br>threshold=0.6318148374557495   |
| node_45: feature_name=cg17439009  | feature_id[1815].value <=<br>threshold=0.48514117300510406 |

|                                   |                                                            |
|-----------------------------------|------------------------------------------------------------|
| node_46: feature_name=cg17537493  | feature_id[2772].value ><br>threshold=0.5825372636318207   |
| node_52: feature_name=cg01683570  | feature_id[110].value ><br>threshold=0.6040188074111938    |
| node_54: feature_name=cg15720017  | feature_id[168].value ><br>threshold=0.7067741453647614    |
| node_60: feature_name=cg23690444  | feature_id[120].value <=<br>threshold=0.16037724912166595  |
| node_61: feature_name=cg00567872  | feature_id[236].value ><br>threshold=0.7005765736103058    |
| node_85: feature_name=cg01014262  | feature_id[764].value <=<br>threshold=0.5737917125225067   |
| node_86: feature_name=cg22946562  | feature_id[1148].value ><br>threshold=0.6328203976154327   |
| node_134: feature_name=cg14514032 | feature_id[202].value <=<br>threshold=0.4389604330062866   |
| node_135: feature_name=cg13488220 | feature_id[241].value ><br>threshold=0.7352153658866882    |
| node_143: feature_name=cg03840920 | feature_id[256].value ><br>threshold=0.502630889415741     |
| node_147: feature_name=cg13634090 | feature_id[822].value ><br>threshold=0.7207068204879761    |
| node_151: feature_name=cg19584674 | feature_id[2364].value <=<br>threshold=0.41758519411087036 |
| node_152: feature_name=cg07344990 | feature_id[411].value ><br>threshold=0.5484964847564697    |
| node_158: feature_name=cg10298992 | feature_id[3066].value ><br>threshold=0.5707973837852478   |
| node_174: feature_name=cg11843516 | feature_id[20].value <=<br>threshold=0.5590928494930267    |
| node_175: feature_name=cg05185926 | feature_id[448].value ><br>threshold=0.17318664491176605   |
| node_177: feature_name=cg17009731 | feature_id[1220].value ><br>threshold=0.6666513085365295   |
| node_179: feature_name=cg01380319 | feature_id[515].value <=<br>threshold=0.39251960813999176  |
| node_180: feature_name=cg20700977 | feature_id[303].value ><br>threshold=0.8422040641307831    |
| node_184: feature_name=cg24259291 | feature_id[164].value ><br>threshold=0.4872268736362457    |
| node_188: feature_name=cg08097657 | feature_id[67].value ><br>threshold=0.3371318429708481     |
| node_190: feature_name=cg07891483 | feature_id[59].value ><br>threshold=0.6211732923984528     |

|                                                       |                                                           |
|-------------------------------------------------------|-----------------------------------------------------------|
| node_194: feature_name=cg20122645                     | feature_id[275].value ><br>threshold=0.6094755828380585   |
| node_196: feature_name=cg04026354                     | feature_id[1763].value <=<br>threshold=0.4341808259487152 |
| node_197: feature_name=cg10149889                     | feature_id[1017].value ><br>threshold=0.6150195300579071  |
| node_201: feature_name=cg14890730                     | feature_id[337].value <=<br>threshold=0.4372602105140686  |
| node_202: feature_name=cg08331427                     | feature_id[132].value ><br>threshold=0.5443233847618103   |
| node_208: feature_name=cg22730007                     | feature_id[2544].value ><br>threshold=0.28619489073753357 |
| node_210: feature_name=cg17193551                     | feature_id[2057].value ><br>threshold=0.4393353909254074  |
| node_212: feature_name=cg14671764                     | feature_id[584].value <=<br>threshold=0.9353199899196625  |
| node_213: feature_name=cg20140662                     | feature_id[2044].value ><br>threshold=0.38030287623405457 |
| node_215: feature_name=cg07891483                     | feature_id[59].value ><br>threshold=0.829958975315094     |
| node_219: feature_name=cg04884579                     | feature_id[1861].value ><br>threshold=0.6106154918670654  |
| node_229: feature_name=cg19548524                     | feature_id[2985].value <=<br>threshold=0.8623353838920593 |
| node_230: feature_name=cg18763720                     | feature_id[523].value ><br>threshold=0.3843051791191101   |
| Class: high-grade conventional osteosarcoma (OS (HG)) |                                                           |
|                                                       |                                                           |
| Rules_140                                             | passed counts:1                                           |
| node_0: feature_name=cg11915444                       | feature_id[1171].value ><br>threshold=0.3402601182460785  |
| node_10: feature_name=cg12109728                      | feature_id[2810].value ><br>threshold=0.7068270146846771  |
| node_20: feature_name=cg16412000                      | feature_id[789].value ><br>threshold=0.6741803884506226   |
| node_24: feature_name=cg17115147                      | feature_id[1434].value <=<br>threshold=0.2961975038051605 |
| node_25: feature_name=cg24474622                      | feature_id[2737].value ><br>threshold=0.7211934924125671  |
| node_29: feature_name=cg10472711                      | feature_id[612].value ><br>threshold=0.45985929667949677  |

|                                   |                                                            |
|-----------------------------------|------------------------------------------------------------|
| node_37: feature_name=cg01937669  | feature_id[188].value <=<br>threshold=0.4809463769197464   |
| node_38: feature_name=cg02157052  | feature_id[451].value <=<br>threshold=0.2869153320789337   |
| node_39: feature_name=cg18751958  | feature_id[1427].value ><br>threshold=0.4813787043094635   |
| node_41: feature_name=cg22512847  | feature_id[1152].value ><br>threshold=0.5129324495792389   |
| node_43: feature_name=cg23345038  | feature_id[1147].value ><br>threshold=0.6318148374557495   |
| node_45: feature_name=cg17439009  | feature_id[1815].value <=<br>threshold=0.48514117300510406 |
| node_46: feature_name=cg17537493  | feature_id[2772].value ><br>threshold=0.5825372636318207   |
| node_52: feature_name=cg01683570  | feature_id[110].value ><br>threshold=0.6040188074111938    |
| node_54: feature_name=cg15720017  | feature_id[168].value ><br>threshold=0.7067741453647614    |
| node_60: feature_name=cg23690444  | feature_id[120].value <=<br>threshold=0.16037724912166595  |
| node_61: feature_name=cg00567872  | feature_id[236].value ><br>threshold=0.7005765736103058    |
| node_85: feature_name=cg01014262  | feature_id[764].value <=<br>threshold=0.5737917125225067   |
| node_86: feature_name=cg22946562  | feature_id[1148].value ><br>threshold=0.6328203976154327   |
| node_134: feature_name=cg14514032 | feature_id[202].value <=<br>threshold=0.4389604330062866   |
| node_135: feature_name=cg13488220 | feature_id[241].value ><br>threshold=0.7352153658866882    |
| node_143: feature_name=cg03840920 | feature_id[256].value ><br>threshold=0.502630889415741     |
| node_147: feature_name=cg13634090 | feature_id[822].value ><br>threshold=0.7207068204879761    |
| node_151: feature_name=cg19584674 | feature_id[2364].value <=<br>threshold=0.41758519411087036 |
| node_152: feature_name=cg07344990 | feature_id[411].value ><br>threshold=0.5484964847564697    |
| node_158: feature_name=cg10298992 | feature_id[3066].value ><br>threshold=0.5707973837852478   |
| node_174: feature_name=cg11843516 | feature_id[20].value <=<br>threshold=0.5590928494930267    |
| node_175: feature_name=cg05185926 | feature_id[448].value ><br>threshold=0.17318664491176605   |



|                                   |                                                           |
|-----------------------------------|-----------------------------------------------------------|
| node_177: feature_name=cg17009731 | feature_id[1220].value ><br>threshold=0.6666513085365295  |
| node_179: feature_name=cg01380319 | feature_id[515].value <=<br>threshold=0.39251960813999176 |
| node_180: feature_name=cg20700977 | feature_id[303].value ><br>threshold=0.8422040641307831   |
| node_184: feature_name=cg24259291 | feature_id[164].value ><br>threshold=0.4872268736362457   |
| node_188: feature_name=cg08097657 | feature_id[67].value ><br>threshold=0.3371318429708481    |
| node_190: feature_name=cg07891483 | feature_id[59].value ><br>threshold=0.6211732923984528    |
| node_194: feature_name=cg20122645 | feature_id[275].value ><br>threshold=0.6094755828380585   |
| node_196: feature_name=cg04026354 | feature_id[1763].value <=<br>threshold=0.4341808259487152 |
| node_197: feature_name=cg10149889 | feature_id[1017].value ><br>threshold=0.6150195300579071  |
| node_201: feature_name=cg14890730 | feature_id[337].value <=<br>threshold=0.4372602105140686  |
| node_202: feature_name=cg08331427 | feature_id[132].value ><br>threshold=0.5443233847618103   |
| node_208: feature_name=cg22730007 | feature_id[2544].value ><br>threshold=0.28619489073753357 |
| node_210: feature_name=cg17193551 | feature_id[2057].value ><br>threshold=0.4393353909254074  |
| node_212: feature_name=cg14671764 | feature_id[584].value <=<br>threshold=0.9353199899196625  |
| node_213: feature_name=cg20140662 | feature_id[2044].value ><br>threshold=0.38030287623405457 |
| node_215: feature_name=cg07891483 | feature_id[59].value ><br>threshold=0.829958975315094     |
| node_219: feature_name=cg04884579 | feature_id[1861].value <=<br>threshold=0.6106154918670654 |
| node_220: feature_name=cg25066857 | feature_id[3759].value <=<br>threshold=0.8149203658103943 |
| node_221: feature_name=cg04813695 | feature_id[1758].value ><br>threshold=0.8937293887138367  |
| node_223: feature_name=cg12895304 | feature_id[5].value <=<br>threshold=0.8254048228263855    |
| node_224: feature_name=cg21863499 | feature_id[2551].value ><br>threshold=0.07621219754219055 |
| Class: myositis ossificans (MO)   |                                                           |

|                                   |                                                            |
|-----------------------------------|------------------------------------------------------------|
|                                   |                                                            |
| Rules_141                         | passed counts:1                                            |
| node_0: feature_name=cg11915444   | feature_id[1171].value ><br>threshold=0.3402601182460785   |
| node_10: feature_name=cg12109728  | feature_id[2810].value ><br>threshold=0.7068270146846771   |
| node_20: feature_name=cg16412000  | feature_id[789].value ><br>threshold=0.6741803884506226    |
| node_24: feature_name=cg17115147  | feature_id[1434].value <=<br>threshold=0.2961975038051605  |
| node_25: feature_name=cg24474622  | feature_id[2737].value ><br>threshold=0.7211934924125671   |
| node_29: feature_name=cg10472711  | feature_id[612].value ><br>threshold=0.45985929667949677   |
| node_37: feature_name=cg01937669  | feature_id[188].value <=<br>threshold=0.4809463769197464   |
| node_38: feature_name=cg02157052  | feature_id[451].value <=<br>threshold=0.2869153320789337   |
| node_39: feature_name=cg18751958  | feature_id[1427].value ><br>threshold=0.4813787043094635   |
| node_41: feature_name=cg22512847  | feature_id[1152].value ><br>threshold=0.5129324495792389   |
| node_43: feature_name=cg23345038  | feature_id[1147].value ><br>threshold=0.6318148374557495   |
| node_45: feature_name=cg17439009  | feature_id[1815].value <=<br>threshold=0.48514117300510406 |
| node_46: feature_name=cg17537493  | feature_id[2772].value ><br>threshold=0.5825372636318207   |
| node_52: feature_name=cg01683570  | feature_id[110].value ><br>threshold=0.6040188074111938    |
| node_54: feature_name=cg15720017  | feature_id[168].value ><br>threshold=0.7067741453647614    |
| node_60: feature_name=cg23690444  | feature_id[120].value <=<br>threshold=0.16037724912166595  |
| node_61: feature_name=cg00567872  | feature_id[236].value ><br>threshold=0.7005765736103058    |
| node_85: feature_name=cg01014262  | feature_id[764].value <=<br>threshold=0.5737917125225067   |
| node_86: feature_name=cg22946562  | feature_id[1148].value ><br>threshold=0.6328203976154327   |
| node_134: feature_name=cg14514032 | feature_id[202].value <=<br>threshold=0.4389604330062866   |

|                                   |                                                            |
|-----------------------------------|------------------------------------------------------------|
| node_135: feature_name=cg13488220 | feature_id[241].value ><br>threshold=0.7352153658866882    |
| node_143: feature_name=cg03840920 | feature_id[256].value ><br>threshold=0.502630889415741     |
| node_147: feature_name=cg13634090 | feature_id[822].value ><br>threshold=0.7207068204879761    |
| node_151: feature_name=cg19584674 | feature_id[2364].value <=<br>threshold=0.41758519411087036 |
| node_152: feature_name=cg07344990 | feature_id[411].value ><br>threshold=0.5484964847564697    |
| node_158: feature_name=cg10298992 | feature_id[3066].value ><br>threshold=0.5707973837852478   |
| node_174: feature_name=cg11843516 | feature_id[20].value <=<br>threshold=0.5590928494930267    |
| node_175: feature_name=cg05185926 | feature_id[448].value ><br>threshold=0.17318664491176605   |
| node_177: feature_name=cg17009731 | feature_id[1220].value ><br>threshold=0.6666513085365295   |
| node_179: feature_name=cg01380319 | feature_id[515].value <=<br>threshold=0.39251960813999176  |
| node_180: feature_name=cg20700977 | feature_id[303].value ><br>threshold=0.8422040641307831    |
| node_184: feature_name=cg24259291 | feature_id[164].value ><br>threshold=0.4872268736362457    |
| node_188: feature_name=cg08097657 | feature_id[67].value ><br>threshold=0.3371318429708481     |
| node_190: feature_name=cg07891483 | feature_id[59].value ><br>threshold=0.6211732923984528     |
| node_194: feature_name=cg20122645 | feature_id[275].value ><br>threshold=0.6094755828380585    |
| node_196: feature_name=cg04026354 | feature_id[1763].value <=<br>threshold=0.4341808259487152  |
| node_197: feature_name=cg10149889 | feature_id[1017].value ><br>threshold=0.6150195300579071   |
| node_201: feature_name=cg14890730 | feature_id[337].value <=<br>threshold=0.4372602105140686   |
| node_202: feature_name=cg08331427 | feature_id[132].value ><br>threshold=0.5443233847618103    |
| node_208: feature_name=cg22730007 | feature_id[2544].value ><br>threshold=0.28619489073753357  |
| node_210: feature_name=cg17193551 | feature_id[2057].value ><br>threshold=0.4393353909254074   |
| node_212: feature_name=cg14671764 | feature_id[584].value <=<br>threshold=0.9353199899196625   |

|                                               |                                                            |
|-----------------------------------------------|------------------------------------------------------------|
| node_213: feature_name=cg20140662             | feature_id[2044].value ><br>threshold=0.38030287623405457  |
| node_215: feature_name=cg07891483             | feature_id[59].value ><br>threshold=0.829958975315094      |
| node_219: feature_name=cg04884579             | feature_id[1861].value <=<br>threshold=0.6106154918670654  |
| node_220: feature_name=cg25066857             | feature_id[3759].value <=<br>threshold=0.8149203658103943  |
| node_221: feature_name=cg04813695             | feature_id[1758].value ><br>threshold=0.8937293887138367   |
| node_223: feature_name=cg12895304             | feature_id[5].value <=<br>threshold=0.8254048228263855     |
| node_224: feature_name=cg21863499             | feature_id[2551].value <=<br>threshold=0.07621219754219055 |
| Class: embryonal rhabdomyosarcoma (RMS (EMB)) |                                                            |
|                                               |                                                            |
| Rules_142                                     | passed counts:1                                            |
| node_0: feature_name=cg11915444               | feature_id[1171].value ><br>threshold=0.3402601182460785   |
| node_10: feature_name=cg12109728              | feature_id[2810].value ><br>threshold=0.7068270146846771   |
| node_20: feature_name=cg16412000              | feature_id[789].value ><br>threshold=0.6741803884506226    |
| node_24: feature_name=cg17115147              | feature_id[1434].value <=<br>threshold=0.2961975038051605  |
| node_25: feature_name=cg24474622              | feature_id[2737].value ><br>threshold=0.7211934924125671   |
| node_29: feature_name=cg10472711              | feature_id[612].value ><br>threshold=0.45985929667949677   |
| node_37: feature_name=cg01937669              | feature_id[188].value <=<br>threshold=0.4809463769197464   |
| node_38: feature_name=cg02157052              | feature_id[451].value <=<br>threshold=0.2869153320789337   |
| node_39: feature_name=cg18751958              | feature_id[1427].value ><br>threshold=0.4813787043094635   |
| node_41: feature_name=cg22512847              | feature_id[1152].value ><br>threshold=0.5129324495792389   |
| node_43: feature_name=cg23345038              | feature_id[1147].value ><br>threshold=0.6318148374557495   |
| node_45: feature_name=cg17439009              | feature_id[1815].value <=<br>threshold=0.48514117300510406 |

|                                   |                                                            |
|-----------------------------------|------------------------------------------------------------|
| node_46: feature_name=cg17537493  | feature_id[2772].value ><br>threshold=0.5825372636318207   |
| node_52: feature_name=cg01683570  | feature_id[110].value ><br>threshold=0.6040188074111938    |
| node_54: feature_name=cg15720017  | feature_id[168].value ><br>threshold=0.7067741453647614    |
| node_60: feature_name=cg23690444  | feature_id[120].value <=<br>threshold=0.16037724912166595  |
| node_61: feature_name=cg00567872  | feature_id[236].value ><br>threshold=0.7005765736103058    |
| node_85: feature_name=cg01014262  | feature_id[764].value <=<br>threshold=0.5737917125225067   |
| node_86: feature_name=cg22946562  | feature_id[1148].value ><br>threshold=0.6328203976154327   |
| node_134: feature_name=cg14514032 | feature_id[202].value <=<br>threshold=0.4389604330062866   |
| node_135: feature_name=cg13488220 | feature_id[241].value ><br>threshold=0.7352153658866882    |
| node_143: feature_name=cg03840920 | feature_id[256].value ><br>threshold=0.502630889415741     |
| node_147: feature_name=cg13634090 | feature_id[822].value ><br>threshold=0.7207068204879761    |
| node_151: feature_name=cg19584674 | feature_id[2364].value <=<br>threshold=0.41758519411087036 |
| node_152: feature_name=cg07344990 | feature_id[411].value ><br>threshold=0.5484964847564697    |
| node_158: feature_name=cg10298992 | feature_id[3066].value ><br>threshold=0.5707973837852478   |
| node_174: feature_name=cg11843516 | feature_id[20].value <=<br>threshold=0.5590928494930267    |
| node_175: feature_name=cg05185926 | feature_id[448].value ><br>threshold=0.17318664491176605   |
| node_177: feature_name=cg17009731 | feature_id[1220].value ><br>threshold=0.6666513085365295   |
| node_179: feature_name=cg01380319 | feature_id[515].value <=<br>threshold=0.39251960813999176  |
| node_180: feature_name=cg20700977 | feature_id[303].value ><br>threshold=0.8422040641307831    |
| node_184: feature_name=cg24259291 | feature_id[164].value ><br>threshold=0.4872268736362457    |
| node_188: feature_name=cg08097657 | feature_id[67].value ><br>threshold=0.3371318429708481     |
| node_190: feature_name=cg07891483 | feature_id[59].value ><br>threshold=0.6211732923984528     |

|                                               |                                                           |
|-----------------------------------------------|-----------------------------------------------------------|
| node_194: feature_name=cg20122645             | feature_id[275].value ><br>threshold=0.6094755828380585   |
| node_196: feature_name=cg04026354             | feature_id[1763].value <=<br>threshold=0.4341808259487152 |
| node_197: feature_name=cg10149889             | feature_id[1017].value ><br>threshold=0.6150195300579071  |
| node_201: feature_name=cg14890730             | feature_id[337].value <=<br>threshold=0.4372602105140686  |
| node_202: feature_name=cg08331427             | feature_id[132].value ><br>threshold=0.5443233847618103   |
| node_208: feature_name=cg22730007             | feature_id[2544].value ><br>threshold=0.28619489073753357 |
| node_210: feature_name=cg17193551             | feature_id[2057].value ><br>threshold=0.4393353909254074  |
| node_212: feature_name=cg14671764             | feature_id[584].value <=<br>threshold=0.9353199899196625  |
| node_213: feature_name=cg20140662             | feature_id[2044].value ><br>threshold=0.38030287623405457 |
| node_215: feature_name=cg07891483             | feature_id[59].value <=<br>threshold=0.829958975315094    |
| node_216: feature_name=cg14487665             | feature_id[3561].value <=<br>threshold=0.8762882351875305 |
| Class: clear cell sarcoma of soft parts (CCS) |                                                           |
|                                               |                                                           |
| Rules_143                                     | passed counts:1                                           |
| node_0: feature_name=cg11915444               | feature_id[1171].value ><br>threshold=0.3402601182460785  |
| node_10: feature_name=cg12109728              | feature_id[2810].value ><br>threshold=0.7068270146846771  |
| node_20: feature_name=cg16412000              | feature_id[789].value ><br>threshold=0.6741803884506226   |
| node_24: feature_name=cg17115147              | feature_id[1434].value <=<br>threshold=0.2961975038051605 |
| node_25: feature_name=cg24474622              | feature_id[2737].value ><br>threshold=0.7211934924125671  |
| node_29: feature_name=cg10472711              | feature_id[612].value ><br>threshold=0.45985929667949677  |
| node_37: feature_name=cg01937669              | feature_id[188].value <=<br>threshold=0.4809463769197464  |
| node_38: feature_name=cg02157052              | feature_id[451].value <=<br>threshold=0.2869153320789337  |
| node_39: feature_name=cg18751958              | feature_id[1427].value ><br>threshold=0.4813787043094635  |

|                                   |                                                            |
|-----------------------------------|------------------------------------------------------------|
| node_41: feature_name=cg22512847  | feature_id[1152].value ><br>threshold=0.5129324495792389   |
| node_43: feature_name=cg23345038  | feature_id[1147].value ><br>threshold=0.6318148374557495   |
| node_45: feature_name=cg17439009  | feature_id[1815].value <=<br>threshold=0.48514117300510406 |
| node_46: feature_name=cg17537493  | feature_id[2772].value ><br>threshold=0.5825372636318207   |
| node_52: feature_name=cg01683570  | feature_id[110].value ><br>threshold=0.6040188074111938    |
| node_54: feature_name=cg15720017  | feature_id[168].value ><br>threshold=0.7067741453647614    |
| node_60: feature_name=cg23690444  | feature_id[120].value <=<br>threshold=0.16037724912166595  |
| node_61: feature_name=cg00567872  | feature_id[236].value ><br>threshold=0.7005765736103058    |
| node_85: feature_name=cg01014262  | feature_id[764].value <=<br>threshold=0.5737917125225067   |
| node_86: feature_name=cg22946562  | feature_id[1148].value ><br>threshold=0.6328203976154327   |
| node_134: feature_name=cg14514032 | feature_id[202].value <=<br>threshold=0.4389604330062866   |
| node_135: feature_name=cg13488220 | feature_id[241].value ><br>threshold=0.7352153658866882    |
| node_143: feature_name=cg03840920 | feature_id[256].value ><br>threshold=0.502630889415741     |
| node_147: feature_name=cg13634090 | feature_id[822].value ><br>threshold=0.7207068204879761    |
| node_151: feature_name=cg19584674 | feature_id[2364].value <=<br>threshold=0.41758519411087036 |
| node_152: feature_name=cg07344990 | feature_id[411].value ><br>threshold=0.5484964847564697    |
| node_158: feature_name=cg10298992 | feature_id[3066].value ><br>threshold=0.5707973837852478   |
| node_174: feature_name=cg11843516 | feature_id[20].value <=<br>threshold=0.5590928494930267    |
| node_175: feature_name=cg05185926 | feature_id[448].value ><br>threshold=0.17318664491176605   |
| node_177: feature_name=cg17009731 | feature_id[1220].value ><br>threshold=0.6666513085365295   |
| node_179: feature_name=cg01380319 | feature_id[515].value <=<br>threshold=0.39251960813999176  |
| node_180: feature_name=cg20700977 | feature_id[303].value ><br>threshold=0.8422040641307831    |

|                                                                                   |                                                           |
|-----------------------------------------------------------------------------------|-----------------------------------------------------------|
| node_184: feature_name=cg24259291                                                 | feature_id[164].value ><br>threshold=0.4872268736362457   |
| node_188: feature_name=cg08097657                                                 | feature_id[67].value ><br>threshold=0.3371318429708481    |
| node_190: feature_name=cg07891483                                                 | feature_id[59].value ><br>threshold=0.6211732923984528    |
| node_194: feature_name=cg20122645                                                 | feature_id[275].value ><br>threshold=0.6094755828380585   |
| node_196: feature_name=cg04026354                                                 | feature_id[1763].value <=<br>threshold=0.4341808259487152 |
| node_197: feature_name=cg10149889                                                 | feature_id[1017].value ><br>threshold=0.6150195300579071  |
| node_201: feature_name=cg14890730                                                 | feature_id[337].value <=<br>threshold=0.4372602105140686  |
| node_202: feature_name=cg08331427                                                 | feature_id[132].value <=<br>threshold=0.5443233847618103  |
| node_203: feature_name=cg04963697                                                 | feature_id[102].value <=<br>threshold=0.7484472692012787  |
| node_204: feature_name=cg23722792                                                 | feature_id[1201].value ><br>threshold=0.8487101495265961  |
| Class: well differentiated liposarcoma (WDLS)/dedifferentiated liposarcoma (DDLs) |                                                           |
|                                                                                   |                                                           |
| Rules_144                                                                         | passed counts:1                                           |
| node_0: feature_name=cg11915444                                                   | feature_id[1171].value ><br>threshold=0.3402601182460785  |
| node_10: feature_name=cg12109728                                                  | feature_id[2810].value ><br>threshold=0.7068270146846771  |
| node_20: feature_name=cg16412000                                                  | feature_id[789].value ><br>threshold=0.6741803884506226   |
| node_24: feature_name=cg17115147                                                  | feature_id[1434].value <=<br>threshold=0.2961975038051605 |
| node_25: feature_name=cg24474622                                                  | feature_id[2737].value ><br>threshold=0.7211934924125671  |
| node_29: feature_name=cg10472711                                                  | feature_id[612].value ><br>threshold=0.45985929667949677  |
| node_37: feature_name=cg01937669                                                  | feature_id[188].value <=<br>threshold=0.4809463769197464  |
| node_38: feature_name=cg02157052                                                  | feature_id[451].value <=<br>threshold=0.2869153320789337  |
| node_39: feature_name=cg18751958                                                  | feature_id[1427].value ><br>threshold=0.4813787043094635  |



|                                   |                                                            |
|-----------------------------------|------------------------------------------------------------|
| node_41: feature_name=cg22512847  | feature_id[1152].value ><br>threshold=0.5129324495792389   |
| node_43: feature_name=cg23345038  | feature_id[1147].value ><br>threshold=0.6318148374557495   |
| node_45: feature_name=cg17439009  | feature_id[1815].value <=<br>threshold=0.48514117300510406 |
| node_46: feature_name=cg17537493  | feature_id[2772].value ><br>threshold=0.5825372636318207   |
| node_52: feature_name=cg01683570  | feature_id[110].value ><br>threshold=0.6040188074111938    |
| node_54: feature_name=cg15720017  | feature_id[168].value ><br>threshold=0.7067741453647614    |
| node_60: feature_name=cg23690444  | feature_id[120].value <=<br>threshold=0.16037724912166595  |
| node_61: feature_name=cg00567872  | feature_id[236].value ><br>threshold=0.7005765736103058    |
| node_85: feature_name=cg01014262  | feature_id[764].value <=<br>threshold=0.5737917125225067   |
| node_86: feature_name=cg22946562  | feature_id[1148].value ><br>threshold=0.6328203976154327   |
| node_134: feature_name=cg14514032 | feature_id[202].value <=<br>threshold=0.4389604330062866   |
| node_135: feature_name=cg13488220 | feature_id[241].value ><br>threshold=0.7352153658866882    |
| node_143: feature_name=cg03840920 | feature_id[256].value ><br>threshold=0.502630889415741     |
| node_147: feature_name=cg13634090 | feature_id[822].value ><br>threshold=0.7207068204879761    |
| node_151: feature_name=cg19584674 | feature_id[2364].value <=<br>threshold=0.41758519411087036 |
| node_152: feature_name=cg07344990 | feature_id[411].value ><br>threshold=0.5484964847564697    |
| node_158: feature_name=cg10298992 | feature_id[3066].value ><br>threshold=0.5707973837852478   |
| node_174: feature_name=cg11843516 | feature_id[20].value <=<br>threshold=0.5590928494930267    |
| node_175: feature_name=cg05185926 | feature_id[448].value ><br>threshold=0.17318664491176605   |
| node_177: feature_name=cg17009731 | feature_id[1220].value ><br>threshold=0.6666513085365295   |
| node_179: feature_name=cg01380319 | feature_id[515].value <=<br>threshold=0.39251960813999176  |
| node_180: feature_name=cg20700977 | feature_id[303].value ><br>threshold=0.8422040641307831    |

|                                   |                                                           |
|-----------------------------------|-----------------------------------------------------------|
| node_184: feature_name=cg24259291 | feature_id[164].value ><br>threshold=0.4872268736362457   |
| node_188: feature_name=cg08097657 | feature_id[67].value ><br>threshold=0.3371318429708481    |
| node_190: feature_name=cg07891483 | feature_id[59].value ><br>threshold=0.6211732923984528    |
| node_194: feature_name=cg20122645 | feature_id[275].value ><br>threshold=0.6094755828380585   |
| node_196: feature_name=cg04026354 | feature_id[1763].value <=<br>threshold=0.4341808259487152 |
| node_197: feature_name=cg10149889 | feature_id[1017].value ><br>threshold=0.6150195300579071  |
| node_201: feature_name=cg14890730 | feature_id[337].value <=<br>threshold=0.4372602105140686  |
| node_202: feature_name=cg08331427 | feature_id[132].value <=<br>threshold=0.5443233847618103  |
| node_203: feature_name=cg04963697 | feature_id[102].value <=<br>threshold=0.7484472692012787  |
| node_204: feature_name=cg23722792 | feature_id[1201].value <=<br>threshold=0.8487101495265961 |
| Class: chondroblastoma (CB)       |                                                           |
|                                   |                                                           |
| Rules_145                         | passed counts:1                                           |
| node_0: feature_name=cg11915444   | feature_id[1171].value ><br>threshold=0.3402601182460785  |
| node_10: feature_name=cg12109728  | feature_id[2810].value ><br>threshold=0.7068270146846771  |
| node_20: feature_name=cg16412000  | feature_id[789].value ><br>threshold=0.6741803884506226   |
| node_24: feature_name=cg17115147  | feature_id[1434].value <=<br>threshold=0.2961975038051605 |
| node_25: feature_name=cg24474622  | feature_id[2737].value ><br>threshold=0.7211934924125671  |
| node_29: feature_name=cg10472711  | feature_id[612].value ><br>threshold=0.45985929667949677  |
| node_37: feature_name=cg01937669  | feature_id[188].value <=<br>threshold=0.4809463769197464  |
| node_38: feature_name=cg02157052  | feature_id[451].value <=<br>threshold=0.2869153320789337  |
| node_39: feature_name=cg18751958  | feature_id[1427].value ><br>threshold=0.4813787043094635  |
| node_41: feature_name=cg22512847  | feature_id[1152].value ><br>threshold=0.5129324495792389  |

|                                   |                                                            |
|-----------------------------------|------------------------------------------------------------|
| node_43: feature_name=cg23345038  | feature_id[1147].value ><br>threshold=0.6318148374557495   |
| node_45: feature_name=cg17439009  | feature_id[1815].value <=<br>threshold=0.48514117300510406 |
| node_46: feature_name=cg17537493  | feature_id[2772].value ><br>threshold=0.5825372636318207   |
| node_52: feature_name=cg01683570  | feature_id[110].value ><br>threshold=0.6040188074111938    |
| node_54: feature_name=cg15720017  | feature_id[168].value ><br>threshold=0.7067741453647614    |
| node_60: feature_name=cg23690444  | feature_id[120].value <=<br>threshold=0.16037724912166595  |
| node_61: feature_name=cg00567872  | feature_id[236].value ><br>threshold=0.7005765736103058    |
| node_85: feature_name=cg01014262  | feature_id[764].value <=<br>threshold=0.5737917125225067   |
| node_86: feature_name=cg22946562  | feature_id[1148].value ><br>threshold=0.6328203976154327   |
| node_134: feature_name=cg14514032 | feature_id[202].value <=<br>threshold=0.4389604330062866   |
| node_135: feature_name=cg13488220 | feature_id[241].value ><br>threshold=0.7352153658866882    |
| node_143: feature_name=cg03840920 | feature_id[256].value ><br>threshold=0.502630889415741     |
| node_147: feature_name=cg13634090 | feature_id[822].value ><br>threshold=0.7207068204879761    |
| node_151: feature_name=cg19584674 | feature_id[2364].value <=<br>threshold=0.41758519411087036 |
| node_152: feature_name=cg07344990 | feature_id[411].value ><br>threshold=0.5484964847564697    |
| node_158: feature_name=cg10298992 | feature_id[3066].value ><br>threshold=0.5707973837852478   |
| node_174: feature_name=cg11843516 | feature_id[20].value <=<br>threshold=0.5590928494930267    |
| node_175: feature_name=cg05185926 | feature_id[448].value ><br>threshold=0.17318664491176605   |
| node_177: feature_name=cg17009731 | feature_id[1220].value ><br>threshold=0.6666513085365295   |
| node_179: feature_name=cg01380319 | feature_id[515].value <=<br>threshold=0.39251960813999176  |
| node_180: feature_name=cg20700977 | feature_id[303].value ><br>threshold=0.8422040641307831    |
| node_184: feature_name=cg24259291 | feature_id[164].value ><br>threshold=0.4872268736362457    |

|                                               |                                                            |
|-----------------------------------------------|------------------------------------------------------------|
| node_188: feature_name=cg08097657             | feature_id[67].value ><br>threshold=0.3371318429708481     |
| node_190: feature_name=cg07891483             | feature_id[59].value <=<br>threshold=0.6211732923984528    |
| node_191: feature_name=cg23903708             | feature_id[1504].value ><br>threshold=0.8707234263420105   |
| Class: clear cell sarcoma of soft parts (CCS) |                                                            |
| Rules_146                                     | passed counts:1                                            |
| node_0: feature_name=cg11915444               | feature_id[1171].value ><br>threshold=0.3402601182460785   |
| node_10: feature_name=cg12109728              | feature_id[2810].value ><br>threshold=0.7068270146846771   |
| node_20: feature_name=cg16412000              | feature_id[789].value ><br>threshold=0.6741803884506226    |
| node_24: feature_name=cg17115147              | feature_id[1434].value <=<br>threshold=0.2961975038051605  |
| node_25: feature_name=cg24474622              | feature_id[2737].value ><br>threshold=0.7211934924125671   |
| node_29: feature_name=cg10472711              | feature_id[612].value ><br>threshold=0.45985929667949677   |
| node_37: feature_name=cg01937669              | feature_id[188].value <=<br>threshold=0.4809463769197464   |
| node_38: feature_name=cg02157052              | feature_id[451].value <=<br>threshold=0.2869153320789337   |
| node_39: feature_name=cg18751958              | feature_id[1427].value ><br>threshold=0.4813787043094635   |
| node_41: feature_name=cg22512847              | feature_id[1152].value ><br>threshold=0.5129324495792389   |
| node_43: feature_name=cg23345038              | feature_id[1147].value ><br>threshold=0.6318148374557495   |
| node_45: feature_name=cg17439009              | feature_id[1815].value <=<br>threshold=0.48514117300510406 |
| node_46: feature_name=cg17537493              | feature_id[2772].value ><br>threshold=0.5825372636318207   |
| node_52: feature_name=cg01683570              | feature_id[110].value ><br>threshold=0.6040188074111938    |
| node_54: feature_name=cg15720017              | feature_id[168].value ><br>threshold=0.7067741453647614    |
| node_60: feature_name=cg23690444              | feature_id[120].value <=<br>threshold=0.16037724912166595  |
| node_61: feature_name=cg00567872              | feature_id[236].value ><br>threshold=0.7005765736103058    |

|                                   |                                                            |
|-----------------------------------|------------------------------------------------------------|
| node_85: feature_name=cg01014262  | feature_id[764].value <=<br>threshold=0.5737917125225067   |
| node_86: feature_name=cg22946562  | feature_id[1148].value ><br>threshold=0.6328203976154327   |
| node_134: feature_name=cg14514032 | feature_id[202].value <=<br>threshold=0.4389604330062866   |
| node_135: feature_name=cg13488220 | feature_id[241].value ><br>threshold=0.7352153658866882    |
| node_143: feature_name=cg03840920 | feature_id[256].value ><br>threshold=0.502630889415741     |
| node_147: feature_name=cg13634090 | feature_id[822].value ><br>threshold=0.7207068204879761    |
| node_151: feature_name=cg19584674 | feature_id[2364].value <=<br>threshold=0.41758519411087036 |
| node_152: feature_name=cg07344990 | feature_id[411].value ><br>threshold=0.5484964847564697    |
| node_158: feature_name=cg10298992 | feature_id[3066].value ><br>threshold=0.5707973837852478   |
| node_174: feature_name=cg11843516 | feature_id[20].value <=<br>threshold=0.5590928494930267    |
| node_175: feature_name=cg05185926 | feature_id[448].value ><br>threshold=0.17318664491176605   |
| node_177: feature_name=cg17009731 | feature_id[1220].value ><br>threshold=0.6666513085365295   |
| node_179: feature_name=cg01380319 | feature_id[515].value <=<br>threshold=0.39251960813999176  |
| node_180: feature_name=cg20700977 | feature_id[303].value ><br>threshold=0.8422040641307831    |
| node_184: feature_name=cg24259291 | feature_id[164].value <=<br>threshold=0.4872268736362457   |
| node_185: feature_name=cg00512280 | feature_id[1400].value <=<br>threshold=0.05498958192765713 |
| Class: chordoma (CHORD)           |                                                            |
| Rules_147                         | passed counts:1                                            |
| node_0: feature_name=cg11915444   | feature_id[1171].value ><br>threshold=0.3402601182460785   |
| node_10: feature_name=cg12109728  | feature_id[2810].value ><br>threshold=0.7068270146846771   |
| node_20: feature_name=cg16412000  | feature_id[789].value ><br>threshold=0.6741803884506226    |
| node_24: feature_name=cg17115147  | feature_id[1434].value <=<br>threshold=0.2961975038051605  |

|                                   |                                                            |
|-----------------------------------|------------------------------------------------------------|
| node_25: feature_name=cg24474622  | feature_id[2737].value ><br>threshold=0.7211934924125671   |
| node_29: feature_name=cg10472711  | feature_id[612].value ><br>threshold=0.45985929667949677   |
| node_37: feature_name=cg01937669  | feature_id[188].value <=<br>threshold=0.4809463769197464   |
| node_38: feature_name=cg02157052  | feature_id[451].value <=<br>threshold=0.2869153320789337   |
| node_39: feature_name=cg18751958  | feature_id[1427].value ><br>threshold=0.4813787043094635   |
| node_41: feature_name=cg22512847  | feature_id[1152].value ><br>threshold=0.5129324495792389   |
| node_43: feature_name=cg23345038  | feature_id[1147].value ><br>threshold=0.6318148374557495   |
| node_45: feature_name=cg17439009  | feature_id[1815].value <=<br>threshold=0.48514117300510406 |
| node_46: feature_name=cg17537493  | feature_id[2772].value ><br>threshold=0.5825372636318207   |
| node_52: feature_name=cg01683570  | feature_id[110].value ><br>threshold=0.6040188074111938    |
| node_54: feature_name=cg15720017  | feature_id[168].value ><br>threshold=0.7067741453647614    |
| node_60: feature_name=cg23690444  | feature_id[120].value <=<br>threshold=0.16037724912166595  |
| node_61: feature_name=cg00567872  | feature_id[236].value ><br>threshold=0.7005765736103058    |
| node_85: feature_name=cg01014262  | feature_id[764].value <=<br>threshold=0.5737917125225067   |
| node_86: feature_name=cg22946562  | feature_id[1148].value ><br>threshold=0.6328203976154327   |
| node_134: feature_name=cg14514032 | feature_id[202].value <=<br>threshold=0.4389604330062866   |
| node_135: feature_name=cg13488220 | feature_id[241].value ><br>threshold=0.7352153658866882    |
| node_143: feature_name=cg03840920 | feature_id[256].value ><br>threshold=0.502630889415741     |
| node_147: feature_name=cg13634090 | feature_id[822].value ><br>threshold=0.7207068204879761    |
| node_151: feature_name=cg19584674 | feature_id[2364].value <=<br>threshold=0.41758519411087036 |
| node_152: feature_name=cg07344990 | feature_id[411].value ><br>threshold=0.5484964847564697    |
| node_158: feature_name=cg10298992 | feature_id[3066].value <=<br>threshold=0.5707973837852478  |

|                                   |                                                            |
|-----------------------------------|------------------------------------------------------------|
| node_159: feature_name=cg24852135 | feature_id[47].value ><br>threshold=0.8445721566677094     |
| node_171: feature_name=cg06474428 | feature_id[3652].value ><br>threshold=0.9347167015075684   |
| Class: lipoma (LIPO)              |                                                            |
| Rules_148                         | passed counts:1                                            |
| node_0: feature_name=cg11915444   | feature_id[1171].value ><br>threshold=0.3402601182460785   |
| node_10: feature_name=cg12109728  | feature_id[2810].value ><br>threshold=0.7068270146846771   |
| node_20: feature_name=cg16412000  | feature_id[789].value ><br>threshold=0.6741803884506226    |
| node_24: feature_name=cg17115147  | feature_id[1434].value <=<br>threshold=0.2961975038051605  |
| node_25: feature_name=cg24474622  | feature_id[2737].value ><br>threshold=0.7211934924125671   |
| node_29: feature_name=cg10472711  | feature_id[612].value ><br>threshold=0.45985929667949677   |
| node_37: feature_name=cg01937669  | feature_id[188].value <=<br>threshold=0.4809463769197464   |
| node_38: feature_name=cg02157052  | feature_id[451].value <=<br>threshold=0.2869153320789337   |
| node_39: feature_name=cg18751958  | feature_id[1427].value ><br>threshold=0.4813787043094635   |
| node_41: feature_name=cg22512847  | feature_id[1152].value ><br>threshold=0.5129324495792389   |
| node_43: feature_name=cg23345038  | feature_id[1147].value ><br>threshold=0.6318148374557495   |
| node_45: feature_name=cg17439009  | feature_id[1815].value <=<br>threshold=0.48514117300510406 |
| node_46: feature_name=cg17537493  | feature_id[2772].value ><br>threshold=0.5825372636318207   |
| node_52: feature_name=cg01683570  | feature_id[110].value ><br>threshold=0.6040188074111938    |
| node_54: feature_name=cg15720017  | feature_id[168].value ><br>threshold=0.7067741453647614    |
| node_60: feature_name=cg23690444  | feature_id[120].value <=<br>threshold=0.16037724912166595  |
| node_61: feature_name=cg00567872  | feature_id[236].value ><br>threshold=0.7005765736103058    |
| node_85: feature_name=cg01014262  | feature_id[764].value <=<br>threshold=0.5737917125225067   |

|                                   |                                                            |
|-----------------------------------|------------------------------------------------------------|
| node_86: feature_name=cg22946562  | feature_id[1148].value ><br>threshold=0.6328203976154327   |
| node_134: feature_name=cg14514032 | feature_id[202].value <=<br>threshold=0.4389604330062866   |
| node_135: feature_name=cg13488220 | feature_id[241].value ><br>threshold=0.7352153658866882    |
| node_143: feature_name=cg03840920 | feature_id[256].value ><br>threshold=0.502630889415741     |
| node_147: feature_name=cg13634090 | feature_id[822].value ><br>threshold=0.7207068204879761    |
| node_151: feature_name=cg19584674 | feature_id[2364].value <=<br>threshold=0.41758519411087036 |
| node_152: feature_name=cg07344990 | feature_id[411].value ><br>threshold=0.5484964847564697    |
| node_158: feature_name=cg10298992 | feature_id[3066].value <=<br>threshold=0.5707973837852478  |
| node_159: feature_name=cg24852135 | feature_id[47].value <=<br>threshold=0.8445721566677094    |
| node_160: feature_name=cg25606046 | feature_id[2007].value <=<br>threshold=0.8722946643829346  |
| node_161: feature_name=cg03212620 | feature_id[1188].value ><br>threshold=0.4703744798898697   |
| node_163: feature_name=cg27096087 | feature_id[2512].value ><br>threshold=0.8232799470424652   |
| node_165: feature_name=cg26963844 | feature_id[175].value ><br>threshold=0.05642275512218475   |
| node_167: feature_name=cg01000937 | feature_id[2904].value ><br>threshold=0.5332071930170059   |
| Class: rhabdomyosarcoma (RMS)     |                                                            |
| Rules_149                         | passed counts:1                                            |
| node_0: feature_name=cg11915444   | feature_id[1171].value ><br>threshold=0.3402601182460785   |
| node_10: feature_name=cg12109728  | feature_id[2810].value ><br>threshold=0.7068270146846771   |
| node_20: feature_name=cg16412000  | feature_id[789].value ><br>threshold=0.6741803884506226    |
| node_24: feature_name=cg17115147  | feature_id[1434].value <=<br>threshold=0.2961975038051605  |
| node_25: feature_name=cg24474622  | feature_id[2737].value ><br>threshold=0.7211934924125671   |
| node_29: feature_name=cg10472711  | feature_id[612].value ><br>threshold=0.45985929667949677   |



|                                   |                                                            |
|-----------------------------------|------------------------------------------------------------|
| node_37: feature_name=cg01937669  | feature_id[188].value <=<br>threshold=0.4809463769197464   |
| node_38: feature_name=cg02157052  | feature_id[451].value <=<br>threshold=0.2869153320789337   |
| node_39: feature_name=cg18751958  | feature_id[1427].value ><br>threshold=0.4813787043094635   |
| node_41: feature_name=cg22512847  | feature_id[1152].value ><br>threshold=0.5129324495792389   |
| node_43: feature_name=cg23345038  | feature_id[1147].value ><br>threshold=0.6318148374557495   |
| node_45: feature_name=cg17439009  | feature_id[1815].value <=<br>threshold=0.48514117300510406 |
| node_46: feature_name=cg17537493  | feature_id[2772].value ><br>threshold=0.5825372636318207   |
| node_52: feature_name=cg01683570  | feature_id[110].value ><br>threshold=0.6040188074111938    |
| node_54: feature_name=cg15720017  | feature_id[168].value ><br>threshold=0.7067741453647614    |
| node_60: feature_name=cg23690444  | feature_id[120].value <=<br>threshold=0.16037724912166595  |
| node_61: feature_name=cg00567872  | feature_id[236].value ><br>threshold=0.7005765736103058    |
| node_85: feature_name=cg01014262  | feature_id[764].value <=<br>threshold=0.5737917125225067   |
| node_86: feature_name=cg22946562  | feature_id[1148].value ><br>threshold=0.6328203976154327   |
| node_134: feature_name=cg14514032 | feature_id[202].value <=<br>threshold=0.4389604330062866   |
| node_135: feature_name=cg13488220 | feature_id[241].value ><br>threshold=0.7352153658866882    |
| node_143: feature_name=cg03840920 | feature_id[256].value ><br>threshold=0.502630889415741     |
| node_147: feature_name=cg13634090 | feature_id[822].value ><br>threshold=0.7207068204879761    |
| node_151: feature_name=cg19584674 | feature_id[2364].value <=<br>threshold=0.41758519411087036 |
| node_152: feature_name=cg07344990 | feature_id[411].value ><br>threshold=0.5484964847564697    |
| node_158: feature_name=cg10298992 | feature_id[3066].value <=<br>threshold=0.5707973837852478  |
| node_159: feature_name=cg24852135 | feature_id[47].value <=<br>threshold=0.8445721566677094    |
| node_160: feature_name=cg25606046 | feature_id[2007].value <=<br>threshold=0.8722946643829346  |

|                                            |                                                            |
|--------------------------------------------|------------------------------------------------------------|
| node_161: feature_name=cg03212620          | feature_id[1188].value ><br>threshold=0.4703744798898697   |
| node_163: feature_name=cg27096087          | feature_id[2512].value ><br>threshold=0.8232799470424652   |
| node_165: feature_name=cg26963844          | feature_id[175].value ><br>threshold=0.05642275512218475   |
| node_167: feature_name=cg01000937          | feature_id[2904].value <=<br>threshold=0.5332071930170059  |
| Class: Langerhans cell histiocytosis (LCH) |                                                            |
|                                            |                                                            |
| Rules_150                                  | passed counts:1                                            |
| node_0: feature_name=cg11915444            | feature_id[1171].value ><br>threshold=0.3402601182460785   |
| node_10: feature_name=cg12109728           | feature_id[2810].value ><br>threshold=0.7068270146846771   |
| node_20: feature_name=cg16412000           | feature_id[789].value ><br>threshold=0.6741803884506226    |
| node_24: feature_name=cg17115147           | feature_id[1434].value <=<br>threshold=0.2961975038051605  |
| node_25: feature_name=cg24474622           | feature_id[2737].value ><br>threshold=0.7211934924125671   |
| node_29: feature_name=cg10472711           | feature_id[612].value ><br>threshold=0.45985929667949677   |
| node_37: feature_name=cg01937669           | feature_id[188].value <=<br>threshold=0.4809463769197464   |
| node_38: feature_name=cg02157052           | feature_id[451].value <=<br>threshold=0.2869153320789337   |
| node_39: feature_name=cg18751958           | feature_id[1427].value ><br>threshold=0.4813787043094635   |
| node_41: feature_name=cg22512847           | feature_id[1152].value ><br>threshold=0.5129324495792389   |
| node_43: feature_name=cg23345038           | feature_id[1147].value ><br>threshold=0.6318148374557495   |
| node_45: feature_name=cg17439009           | feature_id[1815].value <=<br>threshold=0.48514117300510406 |
| node_46: feature_name=cg17537493           | feature_id[2772].value ><br>threshold=0.5825372636318207   |
| node_52: feature_name=cg01683570           | feature_id[110].value ><br>threshold=0.6040188074111938    |
| node_54: feature_name=cg15720017           | feature_id[168].value ><br>threshold=0.7067741453647614    |
| node_60: feature_name=cg23690444           | feature_id[120].value <=<br>threshold=0.16037724912166595  |

|                                                       |                                                            |
|-------------------------------------------------------|------------------------------------------------------------|
| node_61: feature_name=cg00567872                      | feature_id[236].value ><br>threshold=0.7005765736103058    |
| node_85: feature_name=cg01014262                      | feature_id[764].value <=<br>threshold=0.5737917125225067   |
| node_86: feature_name=cg22946562                      | feature_id[1148].value ><br>threshold=0.6328203976154327   |
| node_134: feature_name=cg14514032                     | feature_id[202].value <=<br>threshold=0.4389604330062866   |
| node_135: feature_name=cg13488220                     | feature_id[241].value ><br>threshold=0.7352153658866882    |
| node_143: feature_name=cg03840920                     | feature_id[256].value ><br>threshold=0.502630889415741     |
| node_147: feature_name=cg13634090                     | feature_id[822].value ><br>threshold=0.7207068204879761    |
| node_151: feature_name=cg19584674                     | feature_id[2364].value <=<br>threshold=0.41758519411087036 |
| node_152: feature_name=cg07344990                     | feature_id[411].value ><br>threshold=0.5484964847564697    |
| node_158: feature_name=cg10298992                     | feature_id[3066].value <=<br>threshold=0.5707973837852478  |
| node_159: feature_name=cg24852135                     | feature_id[47].value <=<br>threshold=0.8445721566677094    |
| node_160: feature_name=cg25606046                     | feature_id[2007].value <=<br>threshold=0.8722946643829346  |
| node_161: feature_name=cg03212620                     | feature_id[1188].value ><br>threshold=0.4703744798898697   |
| node_163: feature_name=cg27096087                     | feature_id[2512].value ><br>threshold=0.8232799470424652   |
| node_165: feature_name=cg26963844                     | feature_id[175].value <=<br>threshold=0.05642275512218475  |
| Class: high-grade conventional osteosarcoma (OS (HG)) |                                                            |
|                                                       |                                                            |
| Rules_151                                             | passed counts:1                                            |
| node_0: feature_name=cg11915444                       | feature_id[1171].value ><br>threshold=0.3402601182460785   |
| node_10: feature_name=cg12109728                      | feature_id[2810].value ><br>threshold=0.7068270146846771   |
| node_20: feature_name=cg16412000                      | feature_id[789].value ><br>threshold=0.6741803884506226    |
| node_24: feature_name=cg17115147                      | feature_id[1434].value <=<br>threshold=0.2961975038051605  |

|                                   |                                                            |
|-----------------------------------|------------------------------------------------------------|
| node_25: feature_name=cg24474622  | feature_id[2737].value ><br>threshold=0.7211934924125671   |
| node_29: feature_name=cg10472711  | feature_id[612].value ><br>threshold=0.45985929667949677   |
| node_37: feature_name=cg01937669  | feature_id[188].value <=<br>threshold=0.4809463769197464   |
| node_38: feature_name=cg02157052  | feature_id[451].value <=<br>threshold=0.2869153320789337   |
| node_39: feature_name=cg18751958  | feature_id[1427].value ><br>threshold=0.4813787043094635   |
| node_41: feature_name=cg22512847  | feature_id[1152].value ><br>threshold=0.5129324495792389   |
| node_43: feature_name=cg23345038  | feature_id[1147].value ><br>threshold=0.6318148374557495   |
| node_45: feature_name=cg17439009  | feature_id[1815].value <=<br>threshold=0.48514117300510406 |
| node_46: feature_name=cg17537493  | feature_id[2772].value ><br>threshold=0.5825372636318207   |
| node_52: feature_name=cg01683570  | feature_id[110].value ><br>threshold=0.6040188074111938    |
| node_54: feature_name=cg15720017  | feature_id[168].value ><br>threshold=0.7067741453647614    |
| node_60: feature_name=cg23690444  | feature_id[120].value <=<br>threshold=0.16037724912166595  |
| node_61: feature_name=cg00567872  | feature_id[236].value ><br>threshold=0.7005765736103058    |
| node_85: feature_name=cg01014262  | feature_id[764].value <=<br>threshold=0.5737917125225067   |
| node_86: feature_name=cg22946562  | feature_id[1148].value ><br>threshold=0.6328203976154327   |
| node_134: feature_name=cg14514032 | feature_id[202].value <=<br>threshold=0.4389604330062866   |
| node_135: feature_name=cg13488220 | feature_id[241].value ><br>threshold=0.7352153658866882    |
| node_143: feature_name=cg03840920 | feature_id[256].value ><br>threshold=0.502630889415741     |
| node_147: feature_name=cg13634090 | feature_id[822].value ><br>threshold=0.7207068204879761    |
| node_151: feature_name=cg19584674 | feature_id[2364].value <=<br>threshold=0.41758519411087036 |
| node_152: feature_name=cg07344990 | feature_id[411].value <=<br>threshold=0.5484964847564697   |
| node_153: feature_name=cg18369990 | feature_id[2197].value <=<br>threshold=0.621816486120224   |

|                                   |                                                            |
|-----------------------------------|------------------------------------------------------------|
| node_154: feature_name=cg14560240 | feature_id[2397].value <=<br>threshold=0.538348525762558   |
| Class: sarcoma (SARC)             |                                                            |
| Rules_152                         | passed counts:1                                            |
| node_0: feature_name=cg11915444   | feature_id[1171].value ><br>threshold=0.3402601182460785   |
| node_10: feature_name=cg12109728  | feature_id[2810].value ><br>threshold=0.7068270146846771   |
| node_20: feature_name=cg16412000  | feature_id[789].value ><br>threshold=0.6741803884506226    |
| node_24: feature_name=cg17115147  | feature_id[1434].value <=<br>threshold=0.2961975038051605  |
| node_25: feature_name=cg24474622  | feature_id[2737].value ><br>threshold=0.7211934924125671   |
| node_29: feature_name=cg10472711  | feature_id[612].value ><br>threshold=0.45985929667949677   |
| node_37: feature_name=cg01937669  | feature_id[188].value <=<br>threshold=0.4809463769197464   |
| node_38: feature_name=cg02157052  | feature_id[451].value <=<br>threshold=0.2869153320789337   |
| node_39: feature_name=cg18751958  | feature_id[1427].value ><br>threshold=0.4813787043094635   |
| node_41: feature_name=cg22512847  | feature_id[1152].value ><br>threshold=0.5129324495792389   |
| node_43: feature_name=cg23345038  | feature_id[1147].value ><br>threshold=0.6318148374557495   |
| node_45: feature_name=cg17439009  | feature_id[1815].value <=<br>threshold=0.48514117300510406 |
| node_46: feature_name=cg17537493  | feature_id[2772].value ><br>threshold=0.5825372636318207   |
| node_52: feature_name=cg01683570  | feature_id[110].value ><br>threshold=0.6040188074111938    |
| node_54: feature_name=cg15720017  | feature_id[168].value ><br>threshold=0.7067741453647614    |
| node_60: feature_name=cg23690444  | feature_id[120].value <=<br>threshold=0.16037724912166595  |
| node_61: feature_name=cg00567872  | feature_id[236].value ><br>threshold=0.7005765736103058    |
| node_85: feature_name=cg01014262  | feature_id[764].value <=<br>threshold=0.5737917125225067   |
| node_86: feature_name=cg22946562  | feature_id[1148].value ><br>threshold=0.6328203976154327   |

|                                   |                                                            |
|-----------------------------------|------------------------------------------------------------|
| node_134: feature_name=cg14514032 | feature_id[202].value <=<br>threshold=0.4389604330062866   |
| node_135: feature_name=cg13488220 | feature_id[241].value ><br>threshold=0.7352153658866882    |
| node_143: feature_name=cg03840920 | feature_id[256].value ><br>threshold=0.502630889415741     |
| node_147: feature_name=cg13634090 | feature_id[822].value <=<br>threshold=0.7207068204879761   |
| node_148: feature_name=cg21698310 | feature_id[178].value <=<br>threshold=0.07961717247962952  |
| Class: osteoblastoma (OB)         |                                                            |
| Rules_153                         | passed counts:1                                            |
| node_0: feature_name=cg11915444   | feature_id[1171].value ><br>threshold=0.3402601182460785   |
| node_10: feature_name=cg12109728  | feature_id[2810].value ><br>threshold=0.7068270146846771   |
| node_20: feature_name=cg16412000  | feature_id[789].value ><br>threshold=0.6741803884506226    |
| node_24: feature_name=cg17115147  | feature_id[1434].value <=<br>threshold=0.2961975038051605  |
| node_25: feature_name=cg24474622  | feature_id[2737].value ><br>threshold=0.7211934924125671   |
| node_29: feature_name=cg10472711  | feature_id[612].value ><br>threshold=0.45985929667949677   |
| node_37: feature_name=cg01937669  | feature_id[188].value <=<br>threshold=0.4809463769197464   |
| node_38: feature_name=cg02157052  | feature_id[451].value <=<br>threshold=0.2869153320789337   |
| node_39: feature_name=cg18751958  | feature_id[1427].value ><br>threshold=0.4813787043094635   |
| node_41: feature_name=cg22512847  | feature_id[1152].value ><br>threshold=0.5129324495792389   |
| node_43: feature_name=cg23345038  | feature_id[1147].value ><br>threshold=0.6318148374557495   |
| node_45: feature_name=cg17439009  | feature_id[1815].value <=<br>threshold=0.48514117300510406 |
| node_46: feature_name=cg17537493  | feature_id[2772].value ><br>threshold=0.5825372636318207   |
| node_52: feature_name=cg01683570  | feature_id[110].value ><br>threshold=0.6040188074111938    |
| node_54: feature_name=cg15720017  | feature_id[168].value ><br>threshold=0.7067741453647614    |

|                                              |                                                            |
|----------------------------------------------|------------------------------------------------------------|
| node_60: feature_name=cg23690444             | feature_id[120].value <=<br>threshold=0.16037724912166595  |
| node_61: feature_name=cg00567872             | feature_id[236].value ><br>threshold=0.7005765736103058    |
| node_85: feature_name=cg01014262             | feature_id[764].value <=<br>threshold=0.5737917125225067   |
| node_86: feature_name=cg22946562             | feature_id[1148].value ><br>threshold=0.6328203976154327   |
| node_134: feature_name=cg14514032            | feature_id[202].value <=<br>threshold=0.4389604330062866   |
| node_135: feature_name=cg13488220            | feature_id[241].value ><br>threshold=0.7352153658866882    |
| node_143: feature_name=cg03840920            | feature_id[256].value <=<br>threshold=0.502630889415741    |
| node_144: feature_name=cg12669088            | feature_id[444].value ><br>threshold=0.8584775626659393    |
| Class: low-grade fibromyxoid sarcoma (LGFMS) |                                                            |
| Rules_154                                    | passed counts:1                                            |
| node_0: feature_name=cg11915444              | feature_id[1171].value ><br>threshold=0.3402601182460785   |
| node_10: feature_name=cg12109728             | feature_id[2810].value ><br>threshold=0.7068270146846771   |
| node_20: feature_name=cg16412000             | feature_id[789].value ><br>threshold=0.6741803884506226    |
| node_24: feature_name=cg17115147             | feature_id[1434].value <=<br>threshold=0.2961975038051605  |
| node_25: feature_name=cg24474622             | feature_id[2737].value ><br>threshold=0.7211934924125671   |
| node_29: feature_name=cg10472711             | feature_id[612].value ><br>threshold=0.45985929667949677   |
| node_37: feature_name=cg01937669             | feature_id[188].value <=<br>threshold=0.4809463769197464   |
| node_38: feature_name=cg02157052             | feature_id[451].value <=<br>threshold=0.2869153320789337   |
| node_39: feature_name=cg18751958             | feature_id[1427].value ><br>threshold=0.4813787043094635   |
| node_41: feature_name=cg22512847             | feature_id[1152].value ><br>threshold=0.5129324495792389   |
| node_43: feature_name=cg23345038             | feature_id[1147].value ><br>threshold=0.6318148374557495   |
| node_45: feature_name=cg17439009             | feature_id[1815].value <=<br>threshold=0.48514117300510406 |

|                                   |                                                            |
|-----------------------------------|------------------------------------------------------------|
| node_46: feature_name=cg17537493  | feature_id[2772].value ><br>threshold=0.5825372636318207   |
| node_52: feature_name=cg01683570  | feature_id[110].value ><br>threshold=0.6040188074111938    |
| node_54: feature_name=cg15720017  | feature_id[168].value ><br>threshold=0.7067741453647614    |
| node_60: feature_name=cg23690444  | feature_id[120].value <=<br>threshold=0.16037724912166595  |
| node_61: feature_name=cg00567872  | feature_id[236].value ><br>threshold=0.7005765736103058    |
| node_85: feature_name=cg01014262  | feature_id[764].value <=<br>threshold=0.5737917125225067   |
| node_86: feature_name=cg22946562  | feature_id[1148].value ><br>threshold=0.6328203976154327   |
| node_134: feature_name=cg14514032 | feature_id[202].value <=<br>threshold=0.4389604330062866   |
| node_135: feature_name=cg13488220 | feature_id[241].value <=<br>threshold=0.7352153658866882   |
| node_136: feature_name=cg06132803 | feature_id[3655].value <=<br>threshold=0.29061736911535263 |
| node_137: feature_name=cg08692006 | feature_id[2437].value ><br>threshold=0.25290777534246445  |
| node_139: feature_name=cg04384810 | feature_id[756].value ><br>threshold=0.37209058180451393   |
| Class: synovial sarcoma (SYSA)    |                                                            |
|                                   |                                                            |
| Rules_155                         | passed counts:1                                            |
| node_0: feature_name=cg11915444   | feature_id[1171].value ><br>threshold=0.3402601182460785   |
| node_10: feature_name=cg12109728  | feature_id[2810].value ><br>threshold=0.7068270146846771   |
| node_20: feature_name=cg16412000  | feature_id[789].value ><br>threshold=0.6741803884506226    |
| node_24: feature_name=cg17115147  | feature_id[1434].value <=<br>threshold=0.2961975038051605  |
| node_25: feature_name=cg24474622  | feature_id[2737].value ><br>threshold=0.7211934924125671   |
| node_29: feature_name=cg10472711  | feature_id[612].value ><br>threshold=0.45985929667949677   |
| node_37: feature_name=cg01937669  | feature_id[188].value <=<br>threshold=0.4809463769197464   |
| node_38: feature_name=cg02157052  | feature_id[451].value <=<br>threshold=0.2869153320789337   |



|                                                         |                                                            |
|---------------------------------------------------------|------------------------------------------------------------|
| node_39: feature_name=cg18751958                        | feature_id[1427].value ><br>threshold=0.4813787043094635   |
| node_41: feature_name=cg22512847                        | feature_id[1152].value ><br>threshold=0.5129324495792389   |
| node_43: feature_name=cg23345038                        | feature_id[1147].value ><br>threshold=0.6318148374557495   |
| node_45: feature_name=cg17439009                        | feature_id[1815].value <=<br>threshold=0.48514117300510406 |
| node_46: feature_name=cg17537493                        | feature_id[2772].value ><br>threshold=0.5825372636318207   |
| node_52: feature_name=cg01683570                        | feature_id[110].value ><br>threshold=0.6040188074111938    |
| node_54: feature_name=cg15720017                        | feature_id[168].value ><br>threshold=0.7067741453647614    |
| node_60: feature_name=cg23690444                        | feature_id[120].value <=<br>threshold=0.16037724912166595  |
| node_61: feature_name=cg00567872                        | feature_id[236].value ><br>threshold=0.7005765736103058    |
| node_85: feature_name=cg01014262                        | feature_id[764].value <=<br>threshold=0.5737917125225067   |
| node_86: feature_name=cg22946562                        | feature_id[1148].value ><br>threshold=0.6328203976154327   |
| node_134: feature_name=cg14514032                       | feature_id[202].value <=<br>threshold=0.4389604330062866   |
| node_135: feature_name=cg13488220                       | feature_id[241].value <=<br>threshold=0.7352153658866882   |
| node_136: feature_name=cg06132803                       | feature_id[3655].value <=<br>threshold=0.29061736911535263 |
| node_137: feature_name=cg08692006                       | feature_id[2437].value ><br>threshold=0.25290777534246445  |
| node_139: feature_name=cg04384810                       | feature_id[756].value <=<br>threshold=0.37209058180451393  |
| Class: malignant peripheral nerve sheath tumour (MPNST) |                                                            |
|                                                         |                                                            |
| Rules_156                                               | passed counts:1                                            |
| node_0: feature_name=cg11915444                         | feature_id[1171].value ><br>threshold=0.3402601182460785   |
| node_10: feature_name=cg12109728                        | feature_id[2810].value ><br>threshold=0.7068270146846771   |
| node_20: feature_name=cg16412000                        | feature_id[789].value ><br>threshold=0.6741803884506226    |

|                                   |                                                            |
|-----------------------------------|------------------------------------------------------------|
| node_24: feature_name=cg17115147  | feature_id[1434].value <=<br>threshold=0.2961975038051605  |
| node_25: feature_name=cg24474622  | feature_id[2737].value ><br>threshold=0.7211934924125671   |
| node_29: feature_name=cg10472711  | feature_id[612].value ><br>threshold=0.45985929667949677   |
| node_37: feature_name=cg01937669  | feature_id[188].value <=<br>threshold=0.4809463769197464   |
| node_38: feature_name=cg02157052  | feature_id[451].value <=<br>threshold=0.2869153320789337   |
| node_39: feature_name=cg18751958  | feature_id[1427].value ><br>threshold=0.4813787043094635   |
| node_41: feature_name=cg22512847  | feature_id[1152].value ><br>threshold=0.5129324495792389   |
| node_43: feature_name=cg23345038  | feature_id[1147].value ><br>threshold=0.6318148374557495   |
| node_45: feature_name=cg17439009  | feature_id[1815].value <=<br>threshold=0.48514117300510406 |
| node_46: feature_name=cg17537493  | feature_id[2772].value ><br>threshold=0.5825372636318207   |
| node_52: feature_name=cg01683570  | feature_id[110].value ><br>threshold=0.6040188074111938    |
| node_54: feature_name=cg15720017  | feature_id[168].value ><br>threshold=0.7067741453647614    |
| node_60: feature_name=cg23690444  | feature_id[120].value <=<br>threshold=0.16037724912166595  |
| node_61: feature_name=cg00567872  | feature_id[236].value ><br>threshold=0.7005765736103058    |
| node_85: feature_name=cg01014262  | feature_id[764].value <=<br>threshold=0.5737917125225067   |
| node_86: feature_name=cg22946562  | feature_id[1148].value ><br>threshold=0.6328203976154327   |
| node_134: feature_name=cg14514032 | feature_id[202].value <=<br>threshold=0.4389604330062866   |
| node_135: feature_name=cg13488220 | feature_id[241].value <=<br>threshold=0.7352153658866882   |
| node_136: feature_name=cg06132803 | feature_id[3655].value <=<br>threshold=0.29061736911535263 |
| node_137: feature_name=cg08692006 | feature_id[2437].value <=<br>threshold=0.25290777534246445 |
| Class: fibrous dysplasia (FDY)    |                                                            |
| Rules_157                         | passed counts:1                                            |

|                                   |                                                            |
|-----------------------------------|------------------------------------------------------------|
| node_0: feature_name=cg11915444   | feature_id[1171].value ><br>threshold=0.3402601182460785   |
| node_10: feature_name=cg12109728  | feature_id[2810].value ><br>threshold=0.7068270146846771   |
| node_20: feature_name=cg16412000  | feature_id[789].value ><br>threshold=0.6741803884506226    |
| node_24: feature_name=cg17115147  | feature_id[1434].value <=<br>threshold=0.2961975038051605  |
| node_25: feature_name=cg24474622  | feature_id[2737].value ><br>threshold=0.7211934924125671   |
| node_29: feature_name=cg10472711  | feature_id[612].value ><br>threshold=0.45985929667949677   |
| node_37: feature_name=cg01937669  | feature_id[188].value <=<br>threshold=0.4809463769197464   |
| node_38: feature_name=cg02157052  | feature_id[451].value <=<br>threshold=0.2869153320789337   |
| node_39: feature_name=cg18751958  | feature_id[1427].value ><br>threshold=0.4813787043094635   |
| node_41: feature_name=cg22512847  | feature_id[1152].value ><br>threshold=0.5129324495792389   |
| node_43: feature_name=cg23345038  | feature_id[1147].value ><br>threshold=0.6318148374557495   |
| node_45: feature_name=cg17439009  | feature_id[1815].value <=<br>threshold=0.48514117300510406 |
| node_46: feature_name=cg17537493  | feature_id[2772].value ><br>threshold=0.5825372636318207   |
| node_52: feature_name=cg01683570  | feature_id[110].value ><br>threshold=0.6040188074111938    |
| node_54: feature_name=cg15720017  | feature_id[168].value ><br>threshold=0.7067741453647614    |
| node_60: feature_name=cg23690444  | feature_id[120].value <=<br>threshold=0.16037724912166595  |
| node_61: feature_name=cg00567872  | feature_id[236].value ><br>threshold=0.7005765736103058    |
| node_85: feature_name=cg01014262  | feature_id[764].value <=<br>threshold=0.5737917125225067   |
| node_86: feature_name=cg22946562  | feature_id[1148].value <=<br>threshold=0.6328203976154327  |
| node_87: feature_name=cg18120975  | feature_id[2767].value ><br>threshold=0.7081544995307922   |
| node_91: feature_name=cg17171539  | feature_id[25].value ><br>threshold=0.501024603843689      |
| node_111: feature_name=cg21241424 | feature_id[1155].value <=<br>threshold=0.7665272355079651  |

|                                                  |                                                           |
|--------------------------------------------------|-----------------------------------------------------------|
| node_112: feature_name=cg21897315                | feature_id[3800].value ><br>threshold=0.48165470361709595 |
| node_114: feature_name=cg04375492                | feature_id[2874].value ><br>threshold=0.7812598049640656  |
| node_116: feature_name=cg09892984                | feature_id[3615].value ><br>threshold=0.6039115190505981  |
| node_118: feature_name=cg05076082                | feature_id[215].value ><br>threshold=0.7612724006175995   |
| node_120: feature_name=cg15776300                | feature_id[3872].value <=<br>threshold=0.922246515750885  |
| node_121: feature_name=cg12109728                | feature_id[2810].value ><br>threshold=0.8809287846088409  |
| node_123: feature_name=cg24482246                | feature_id[2019].value ><br>threshold=0.6093599200248718  |
| node_125: feature_name=cg22221847                | feature_id[3484].value ><br>threshold=0.5291177108883858  |
| node_127: feature_name=cg25950520                | feature_id[771].value ><br>threshold=0.7284954488277435   |
| node_129: feature_name=cg26937267                | feature_id[2919].value ><br>threshold=0.8173473179340363  |
| Class: inflammatory myofibroblastic tumour (IMT) |                                                           |
|                                                  |                                                           |
| Rules_158                                        | passed counts:1                                           |
| node_0: feature_name=cg11915444                  | feature_id[1171].value ><br>threshold=0.3402601182460785  |
| node_10: feature_name=cg12109728                 | feature_id[2810].value ><br>threshold=0.7068270146846771  |
| node_20: feature_name=cg16412000                 | feature_id[789].value ><br>threshold=0.6741803884506226   |
| node_24: feature_name=cg17115147                 | feature_id[1434].value <=<br>threshold=0.2961975038051605 |
| node_25: feature_name=cg24474622                 | feature_id[2737].value ><br>threshold=0.7211934924125671  |
| node_29: feature_name=cg10472711                 | feature_id[612].value ><br>threshold=0.45985929667949677  |
| node_37: feature_name=cg01937669                 | feature_id[188].value <=<br>threshold=0.4809463769197464  |
| node_38: feature_name=cg02157052                 | feature_id[451].value <=<br>threshold=0.2869153320789337  |
| node_39: feature_name=cg18751958                 | feature_id[1427].value ><br>threshold=0.4813787043094635  |

|                                   |                                                            |
|-----------------------------------|------------------------------------------------------------|
| node_41: feature_name=cg22512847  | feature_id[1152].value ><br>threshold=0.5129324495792389   |
| node_43: feature_name=cg23345038  | feature_id[1147].value ><br>threshold=0.6318148374557495   |
| node_45: feature_name=cg17439009  | feature_id[1815].value <=<br>threshold=0.48514117300510406 |
| node_46: feature_name=cg17537493  | feature_id[2772].value ><br>threshold=0.5825372636318207   |
| node_52: feature_name=cg01683570  | feature_id[110].value ><br>threshold=0.6040188074111938    |
| node_54: feature_name=cg15720017  | feature_id[168].value ><br>threshold=0.7067741453647614    |
| node_60: feature_name=cg23690444  | feature_id[120].value <=<br>threshold=0.16037724912166595  |
| node_61: feature_name=cg00567872  | feature_id[236].value ><br>threshold=0.7005765736103058    |
| node_85: feature_name=cg01014262  | feature_id[764].value <=<br>threshold=0.5737917125225067   |
| node_86: feature_name=cg22946562  | feature_id[1148].value <=<br>threshold=0.6328203976154327  |
| node_87: feature_name=cg18120975  | feature_id[2767].value ><br>threshold=0.7081544995307922   |
| node_91: feature_name=cg17171539  | feature_id[25].value ><br>threshold=0.501024603843689      |
| node_111: feature_name=cg21241424 | feature_id[1155].value <=<br>threshold=0.7665272355079651  |
| node_112: feature_name=cg21897315 | feature_id[3800].value ><br>threshold=0.48165470361709595  |
| node_114: feature_name=cg04375492 | feature_id[2874].value ><br>threshold=0.7812598049640656   |
| node_116: feature_name=cg09892984 | feature_id[3615].value ><br>threshold=0.6039115190505981   |
| node_118: feature_name=cg05076082 | feature_id[215].value ><br>threshold=0.7612724006175995    |
| node_120: feature_name=cg15776300 | feature_id[3872].value <=<br>threshold=0.922246515750885   |
| node_121: feature_name=cg12109728 | feature_id[2810].value ><br>threshold=0.8809287846088409   |
| node_123: feature_name=cg24482246 | feature_id[2019].value ><br>threshold=0.6093599200248718   |
| node_125: feature_name=cg22221847 | feature_id[3484].value ><br>threshold=0.5291177108883858   |
| node_127: feature_name=cg25950520 | feature_id[771].value ><br>threshold=0.7284954488277435    |

|                                         |                                                            |
|-----------------------------------------|------------------------------------------------------------|
| node_129: feature_name=cg26937267       | feature_id[2919].value <=<br>threshold=0.8173473179340363  |
| Class: giant cell tumour of bone (GCTB) |                                                            |
| Rules_159                               | passed counts:1                                            |
| node_0: feature_name=cg11915444         | feature_id[1171].value ><br>threshold=0.3402601182460785   |
| node_10: feature_name=cg12109728        | feature_id[2810].value ><br>threshold=0.7068270146846771   |
| node_20: feature_name=cg16412000        | feature_id[789].value ><br>threshold=0.6741803884506226    |
| node_24: feature_name=cg17115147        | feature_id[1434].value <=<br>threshold=0.2961975038051605  |
| node_25: feature_name=cg24474622        | feature_id[2737].value ><br>threshold=0.7211934924125671   |
| node_29: feature_name=cg10472711        | feature_id[612].value ><br>threshold=0.45985929667949677   |
| node_37: feature_name=cg01937669        | feature_id[188].value <=<br>threshold=0.4809463769197464   |
| node_38: feature_name=cg02157052        | feature_id[451].value <=<br>threshold=0.2869153320789337   |
| node_39: feature_name=cg18751958        | feature_id[1427].value ><br>threshold=0.4813787043094635   |
| node_41: feature_name=cg22512847        | feature_id[1152].value ><br>threshold=0.5129324495792389   |
| node_43: feature_name=cg23345038        | feature_id[1147].value ><br>threshold=0.6318148374557495   |
| node_45: feature_name=cg17439009        | feature_id[1815].value <=<br>threshold=0.48514117300510406 |
| node_46: feature_name=cg17537493        | feature_id[2772].value ><br>threshold=0.5825372636318207   |
| node_52: feature_name=cg01683570        | feature_id[110].value ><br>threshold=0.6040188074111938    |
| node_54: feature_name=cg15720017        | feature_id[168].value ><br>threshold=0.7067741453647614    |
| node_60: feature_name=cg23690444        | feature_id[120].value <=<br>threshold=0.16037724912166595  |
| node_61: feature_name=cg00567872        | feature_id[236].value ><br>threshold=0.7005765736103058    |
| node_85: feature_name=cg01014262        | feature_id[764].value <=<br>threshold=0.5737917125225067   |
| node_86: feature_name=cg22946562        | feature_id[1148].value <=<br>threshold=0.6328203976154327  |

|                                                 |                                                           |
|-------------------------------------------------|-----------------------------------------------------------|
| node_87: feature_name=cg18120975                | feature_id[2767].value ><br>threshold=0.7081544995307922  |
| node_91: feature_name=cg17171539                | feature_id[25].value ><br>threshold=0.501024603843689     |
| node_111: feature_name=cg21241424               | feature_id[1155].value <=<br>threshold=0.7665272355079651 |
| node_112: feature_name=cg21897315               | feature_id[3800].value ><br>threshold=0.48165470361709595 |
| node_114: feature_name=cg04375492               | feature_id[2874].value ><br>threshold=0.7812598049640656  |
| node_116: feature_name=cg09892984               | feature_id[3615].value ><br>threshold=0.6039115190505981  |
| node_118: feature_name=cg05076082               | feature_id[215].value ><br>threshold=0.7612724006175995   |
| node_120: feature_name=cg15776300               | feature_id[3872].value <=<br>threshold=0.922246515750885  |
| node_121: feature_name=cg12109728               | feature_id[2810].value ><br>threshold=0.8809287846088409  |
| node_123: feature_name=cg24482246               | feature_id[2019].value ><br>threshold=0.6093599200248718  |
| node_125: feature_name=cg22221847               | feature_id[3484].value ><br>threshold=0.5291177108883858  |
| node_127: feature_name=cg25950520               | feature_id[771].value <=<br>threshold=0.7284954488277435  |
| Class: sclerosing epithelioid fibrosarcoma(SEF) |                                                           |
|                                                 |                                                           |
| Rules_160                                       | passed counts:1                                           |
| node_0: feature_name=cg11915444                 | feature_id[1171].value ><br>threshold=0.3402601182460785  |
| node_10: feature_name=cg12109728                | feature_id[2810].value ><br>threshold=0.7068270146846771  |
| node_20: feature_name=cg16412000                | feature_id[789].value ><br>threshold=0.6741803884506226   |
| node_24: feature_name=cg17115147                | feature_id[1434].value <=<br>threshold=0.2961975038051605 |
| node_25: feature_name=cg24474622                | feature_id[2737].value ><br>threshold=0.7211934924125671  |
| node_29: feature_name=cg10472711                | feature_id[612].value ><br>threshold=0.45985929667949677  |
| node_37: feature_name=cg01937669                | feature_id[188].value <=<br>threshold=0.4809463769197464  |
| node_38: feature_name=cg02157052                | feature_id[451].value <=<br>threshold=0.2869153320789337  |

|                                   |                                                            |
|-----------------------------------|------------------------------------------------------------|
| node_39: feature_name=cg18751958  | feature_id[1427].value ><br>threshold=0.4813787043094635   |
| node_41: feature_name=cg22512847  | feature_id[1152].value ><br>threshold=0.5129324495792389   |
| node_43: feature_name=cg23345038  | feature_id[1147].value ><br>threshold=0.6318148374557495   |
| node_45: feature_name=cg17439009  | feature_id[1815].value <=<br>threshold=0.48514117300510406 |
| node_46: feature_name=cg17537493  | feature_id[2772].value ><br>threshold=0.5825372636318207   |
| node_52: feature_name=cg01683570  | feature_id[110].value ><br>threshold=0.6040188074111938    |
| node_54: feature_name=cg15720017  | feature_id[168].value ><br>threshold=0.7067741453647614    |
| node_60: feature_name=cg23690444  | feature_id[120].value <=<br>threshold=0.16037724912166595  |
| node_61: feature_name=cg00567872  | feature_id[236].value ><br>threshold=0.7005765736103058    |
| node_85: feature_name=cg01014262  | feature_id[764].value <=<br>threshold=0.5737917125225067   |
| node_86: feature_name=cg22946562  | feature_id[1148].value <=<br>threshold=0.6328203976154327  |
| node_87: feature_name=cg18120975  | feature_id[2767].value ><br>threshold=0.7081544995307922   |
| node_91: feature_name=cg17171539  | feature_id[25].value ><br>threshold=0.501024603843689      |
| node_111: feature_name=cg21241424 | feature_id[1155].value <=<br>threshold=0.7665272355079651  |
| node_112: feature_name=cg21897315 | feature_id[3800].value ><br>threshold=0.48165470361709595  |
| node_114: feature_name=cg04375492 | feature_id[2874].value ><br>threshold=0.7812598049640656   |
| node_116: feature_name=cg09892984 | feature_id[3615].value ><br>threshold=0.6039115190505981   |
| node_118: feature_name=cg05076082 | feature_id[215].value ><br>threshold=0.7612724006175995    |
| node_120: feature_name=cg15776300 | feature_id[3872].value <=<br>threshold=0.922246515750885   |
| node_121: feature_name=cg12109728 | feature_id[2810].value ><br>threshold=0.8809287846088409   |
| node_123: feature_name=cg24482246 | feature_id[2019].value ><br>threshold=0.6093599200248718   |
| node_125: feature_name=cg22221847 | feature_id[3484].value <=<br>threshold=0.5291177108883858  |



|                                  |                                                            |
|----------------------------------|------------------------------------------------------------|
| Class: Ewing sarcoma (EWING)     |                                                            |
|                                  |                                                            |
| Rules_161                        | passed counts:1                                            |
| node_0: feature_name=cg11915444  | feature_id[1171].value ><br>threshold=0.3402601182460785   |
| node_10: feature_name=cg12109728 | feature_id[2810].value ><br>threshold=0.7068270146846771   |
| node_20: feature_name=cg16412000 | feature_id[789].value ><br>threshold=0.6741803884506226    |
| node_24: feature_name=cg17115147 | feature_id[1434].value <=<br>threshold=0.2961975038051605  |
| node_25: feature_name=cg24474622 | feature_id[2737].value ><br>threshold=0.7211934924125671   |
| node_29: feature_name=cg10472711 | feature_id[612].value ><br>threshold=0.45985929667949677   |
| node_37: feature_name=cg01937669 | feature_id[188].value <=<br>threshold=0.4809463769197464   |
| node_38: feature_name=cg02157052 | feature_id[451].value <=<br>threshold=0.2869153320789337   |
| node_39: feature_name=cg18751958 | feature_id[1427].value ><br>threshold=0.4813787043094635   |
| node_41: feature_name=cg22512847 | feature_id[1152].value ><br>threshold=0.5129324495792389   |
| node_43: feature_name=cg23345038 | feature_id[1147].value ><br>threshold=0.6318148374557495   |
| node_45: feature_name=cg17439009 | feature_id[1815].value <=<br>threshold=0.48514117300510406 |
| node_46: feature_name=cg17537493 | feature_id[2772].value ><br>threshold=0.5825372636318207   |
| node_52: feature_name=cg01683570 | feature_id[110].value ><br>threshold=0.6040188074111938    |
| node_54: feature_name=cg15720017 | feature_id[168].value ><br>threshold=0.7067741453647614    |
| node_60: feature_name=cg23690444 | feature_id[120].value <=<br>threshold=0.16037724912166595  |
| node_61: feature_name=cg00567872 | feature_id[236].value ><br>threshold=0.7005765736103058    |
| node_85: feature_name=cg01014262 | feature_id[764].value <=<br>threshold=0.5737917125225067   |
| node_86: feature_name=cg22946562 | feature_id[1148].value <=<br>threshold=0.6328203976154327  |
| node_87: feature_name=cg18120975 | feature_id[2767].value ><br>threshold=0.7081544995307922   |

|                                                                                   |                                                           |
|-----------------------------------------------------------------------------------|-----------------------------------------------------------|
| node_91: feature_name=cg17171539                                                  | feature_id[25].value ><br>threshold=0.501024603843689     |
| node_111: feature_name=cg21241424                                                 | feature_id[1155].value <=<br>threshold=0.7665272355079651 |
| node_112: feature_name=cg21897315                                                 | feature_id[3800].value ><br>threshold=0.48165470361709595 |
| node_114: feature_name=cg04375492                                                 | feature_id[2874].value ><br>threshold=0.7812598049640656  |
| node_116: feature_name=cg09892984                                                 | feature_id[3615].value ><br>threshold=0.6039115190505981  |
| node_118: feature_name=cg05076082                                                 | feature_id[215].value ><br>threshold=0.7612724006175995   |
| node_120: feature_name=cg15776300                                                 | feature_id[3872].value <=<br>threshold=0.922246515750885  |
| node_121: feature_name=cg12109728                                                 | feature_id[2810].value ><br>threshold=0.8809287846088409  |
| node_123: feature_name=cg24482246                                                 | feature_id[2019].value <=<br>threshold=0.6093599200248718 |
| Class: well differentiated liposarcoma (WDLS)/dedifferentiated liposarcoma (DDLs) |                                                           |
| Rules_162                                                                         | passed counts:1                                           |
| node_0: feature_name=cg11915444                                                   | feature_id[1171].value ><br>threshold=0.3402601182460785  |
| node_10: feature_name=cg12109728                                                  | feature_id[2810].value ><br>threshold=0.7068270146846771  |
| node_20: feature_name=cg16412000                                                  | feature_id[789].value ><br>threshold=0.6741803884506226   |
| node_24: feature_name=cg17115147                                                  | feature_id[1434].value <=<br>threshold=0.2961975038051605 |
| node_25: feature_name=cg24474622                                                  | feature_id[2737].value ><br>threshold=0.7211934924125671  |
| node_29: feature_name=cg10472711                                                  | feature_id[612].value ><br>threshold=0.45985929667949677  |
| node_37: feature_name=cg01937669                                                  | feature_id[188].value <=<br>threshold=0.4809463769197464  |
| node_38: feature_name=cg02157052                                                  | feature_id[451].value <=<br>threshold=0.2869153320789337  |
| node_39: feature_name=cg18751958                                                  | feature_id[1427].value ><br>threshold=0.4813787043094635  |
| node_41: feature_name=cg22512847                                                  | feature_id[1152].value ><br>threshold=0.5129324495792389  |

|                                   |                                                            |
|-----------------------------------|------------------------------------------------------------|
| node_43: feature_name=cg23345038  | feature_id[1147].value ><br>threshold=0.6318148374557495   |
| node_45: feature_name=cg17439009  | feature_id[1815].value <=<br>threshold=0.48514117300510406 |
| node_46: feature_name=cg17537493  | feature_id[2772].value ><br>threshold=0.5825372636318207   |
| node_52: feature_name=cg01683570  | feature_id[110].value ><br>threshold=0.6040188074111938    |
| node_54: feature_name=cg15720017  | feature_id[168].value ><br>threshold=0.7067741453647614    |
| node_60: feature_name=cg23690444  | feature_id[120].value <=<br>threshold=0.16037724912166595  |
| node_61: feature_name=cg00567872  | feature_id[236].value ><br>threshold=0.7005765736103058    |
| node_85: feature_name=cg01014262  | feature_id[764].value <=<br>threshold=0.5737917125225067   |
| node_86: feature_name=cg22946562  | feature_id[1148].value <=<br>threshold=0.6328203976154327  |
| node_87: feature_name=cg18120975  | feature_id[2767].value ><br>threshold=0.7081544995307922   |
| node_91: feature_name=cg17171539  | feature_id[25].value <=<br>threshold=0.501024603843689     |
| node_92: feature_name=cg00007036  | feature_id[1586].value ><br>threshold=0.943472146987915    |
| node_104: feature_name=cg14156441 | feature_id[3273].value <=<br>threshold=0.24960360676050186 |
| node_105: feature_name=cg10885338 | feature_id[3603].value ><br>threshold=0.7335180938243866   |
| node_107: feature_name=cg02197542 | feature_id[220].value ><br>threshold=0.700266033411026     |
| Class: rhabdomyosarcoma (RMS)     |                                                            |
| Rules_163                         | passed counts:1                                            |
| node_0: feature_name=cg11915444   | feature_id[1171].value ><br>threshold=0.3402601182460785   |
| node_10: feature_name=cg12109728  | feature_id[2810].value ><br>threshold=0.7068270146846771   |
| node_20: feature_name=cg16412000  | feature_id[789].value ><br>threshold=0.6741803884506226    |
| node_24: feature_name=cg17115147  | feature_id[1434].value <=<br>threshold=0.2961975038051605  |
| node_25: feature_name=cg24474622  | feature_id[2737].value ><br>threshold=0.7211934924125671   |

|                                   |                                                            |
|-----------------------------------|------------------------------------------------------------|
| node_29: feature_name=cg10472711  | feature_id[612].value ><br>threshold=0.45985929667949677   |
| node_37: feature_name=cg01937669  | feature_id[188].value <=<br>threshold=0.4809463769197464   |
| node_38: feature_name=cg02157052  | feature_id[451].value <=<br>threshold=0.2869153320789337   |
| node_39: feature_name=cg18751958  | feature_id[1427].value ><br>threshold=0.4813787043094635   |
| node_41: feature_name=cg22512847  | feature_id[1152].value ><br>threshold=0.5129324495792389   |
| node_43: feature_name=cg23345038  | feature_id[1147].value ><br>threshold=0.6318148374557495   |
| node_45: feature_name=cg17439009  | feature_id[1815].value <=<br>threshold=0.48514117300510406 |
| node_46: feature_name=cg17537493  | feature_id[2772].value ><br>threshold=0.5825372636318207   |
| node_52: feature_name=cg01683570  | feature_id[110].value ><br>threshold=0.6040188074111938    |
| node_54: feature_name=cg15720017  | feature_id[168].value ><br>threshold=0.7067741453647614    |
| node_60: feature_name=cg23690444  | feature_id[120].value <=<br>threshold=0.16037724912166595  |
| node_61: feature_name=cg00567872  | feature_id[236].value ><br>threshold=0.7005765736103058    |
| node_85: feature_name=cg01014262  | feature_id[764].value <=<br>threshold=0.5737917125225067   |
| node_86: feature_name=cg22946562  | feature_id[1148].value <=<br>threshold=0.6328203976154327  |
| node_87: feature_name=cg18120975  | feature_id[2767].value ><br>threshold=0.7081544995307922   |
| node_91: feature_name=cg17171539  | feature_id[25].value <=<br>threshold=0.501024603843689     |
| node_92: feature_name=cg00007036  | feature_id[1586].value ><br>threshold=0.943472146987915    |
| node_104: feature_name=cg14156441 | feature_id[3273].value <=<br>threshold=0.24960360676050186 |
| node_105: feature_name=cg10885338 | feature_id[3603].value ><br>threshold=0.7335180938243866   |
| node_107: feature_name=cg02197542 | feature_id[220].value <=<br>threshold=0.700266033411026    |
| Class: nodular fasciitis(NFA)     |                                                            |
|                                   |                                                            |
| Rules_164                         | passed counts:1                                            |

|                                  |                                                            |
|----------------------------------|------------------------------------------------------------|
| node_0: feature_name=cg11915444  | feature_id[1171].value ><br>threshold=0.3402601182460785   |
| node_10: feature_name=cg12109728 | feature_id[2810].value ><br>threshold=0.7068270146846771   |
| node_20: feature_name=cg16412000 | feature_id[789].value ><br>threshold=0.6741803884506226    |
| node_24: feature_name=cg17115147 | feature_id[1434].value <=<br>threshold=0.2961975038051605  |
| node_25: feature_name=cg24474622 | feature_id[2737].value ><br>threshold=0.7211934924125671   |
| node_29: feature_name=cg10472711 | feature_id[612].value ><br>threshold=0.45985929667949677   |
| node_37: feature_name=cg01937669 | feature_id[188].value <=<br>threshold=0.4809463769197464   |
| node_38: feature_name=cg02157052 | feature_id[451].value <=<br>threshold=0.2869153320789337   |
| node_39: feature_name=cg18751958 | feature_id[1427].value ><br>threshold=0.4813787043094635   |
| node_41: feature_name=cg22512847 | feature_id[1152].value ><br>threshold=0.5129324495792389   |
| node_43: feature_name=cg23345038 | feature_id[1147].value ><br>threshold=0.6318148374557495   |
| node_45: feature_name=cg17439009 | feature_id[1815].value <=<br>threshold=0.48514117300510406 |
| node_46: feature_name=cg17537493 | feature_id[2772].value ><br>threshold=0.5825372636318207   |
| node_52: feature_name=cg01683570 | feature_id[110].value ><br>threshold=0.6040188074111938    |
| node_54: feature_name=cg15720017 | feature_id[168].value ><br>threshold=0.7067741453647614    |
| node_60: feature_name=cg23690444 | feature_id[120].value <=<br>threshold=0.16037724912166595  |
| node_61: feature_name=cg00567872 | feature_id[236].value ><br>threshold=0.7005765736103058    |
| node_85: feature_name=cg01014262 | feature_id[764].value <=<br>threshold=0.5737917125225067   |
| node_86: feature_name=cg22946562 | feature_id[1148].value <=<br>threshold=0.6328203976154327  |
| node_87: feature_name=cg18120975 | feature_id[2767].value ><br>threshold=0.7081544995307922   |
| node_91: feature_name=cg17171539 | feature_id[25].value <=<br>threshold=0.501024603843689     |
| node_92: feature_name=cg00007036 | feature_id[1586].value <=<br>threshold=0.943472146987915   |

|                                         |                                                            |
|-----------------------------------------|------------------------------------------------------------|
| node_93: feature_name=cg16570314        | feature_id[479].value <=<br>threshold=0.7333994507789612   |
| node_94: feature_name=cg15117891        | feature_id[2220].value <=<br>threshold=0.9664478302001953  |
| node_95: feature_name=cg00967711        | feature_id[414].value ><br>threshold=0.22273091971874237   |
| node_97: feature_name=cg08642081        | feature_id[2259].value ><br>threshold=0.8612778782844543   |
| node_99: feature_name=cg18749563        | feature_id[3838].value ><br>threshold=0.9820527732372284   |
| Class: undifferentiated sarcoma (USARC) |                                                            |
| Rules_165                               | passed counts:1                                            |
| node_0: feature_name=cg11915444         | feature_id[1171].value ><br>threshold=0.3402601182460785   |
| node_10: feature_name=cg12109728        | feature_id[2810].value ><br>threshold=0.7068270146846771   |
| node_20: feature_name=cg16412000        | feature_id[789].value ><br>threshold=0.6741803884506226    |
| node_24: feature_name=cg17115147        | feature_id[1434].value <=<br>threshold=0.2961975038051605  |
| node_25: feature_name=cg24474622        | feature_id[2737].value ><br>threshold=0.7211934924125671   |
| node_29: feature_name=cg10472711        | feature_id[612].value ><br>threshold=0.45985929667949677   |
| node_37: feature_name=cg01937669        | feature_id[188].value <=<br>threshold=0.4809463769197464   |
| node_38: feature_name=cg02157052        | feature_id[451].value <=<br>threshold=0.2869153320789337   |
| node_39: feature_name=cg18751958        | feature_id[1427].value ><br>threshold=0.4813787043094635   |
| node_41: feature_name=cg22512847        | feature_id[1152].value ><br>threshold=0.5129324495792389   |
| node_43: feature_name=cg23345038        | feature_id[1147].value ><br>threshold=0.6318148374557495   |
| node_45: feature_name=cg17439009        | feature_id[1815].value <=<br>threshold=0.48514117300510406 |
| node_46: feature_name=cg17537493        | feature_id[2772].value ><br>threshold=0.5825372636318207   |
| node_52: feature_name=cg01683570        | feature_id[110].value ><br>threshold=0.6040188074111938    |
| node_54: feature_name=cg15720017        | feature_id[168].value ><br>threshold=0.7067741453647614    |

|                                              |                                                           |
|----------------------------------------------|-----------------------------------------------------------|
| node_60: feature_name=cg23690444             | feature_id[120].value <=<br>threshold=0.16037724912166595 |
| node_61: feature_name=cg00567872             | feature_id[236].value ><br>threshold=0.7005765736103058   |
| node_85: feature_name=cg01014262             | feature_id[764].value <=<br>threshold=0.5737917125225067  |
| node_86: feature_name=cg22946562             | feature_id[1148].value <=<br>threshold=0.6328203976154327 |
| node_87: feature_name=cg18120975             | feature_id[2767].value ><br>threshold=0.7081544995307922  |
| node_91: feature_name=cg17171539             | feature_id[25].value <=<br>threshold=0.501024603843689    |
| node_92: feature_name=cg00007036             | feature_id[1586].value <=<br>threshold=0.943472146987915  |
| node_93: feature_name=cg16570314             | feature_id[479].value <=<br>threshold=0.7333994507789612  |
| node_94: feature_name=cg15117891             | feature_id[2220].value <=<br>threshold=0.9664478302001953 |
| node_95: feature_name=cg00967711             | feature_id[414].value ><br>threshold=0.22273091971874237  |
| node_97: feature_name=cg08642081             | feature_id[2259].value ><br>threshold=0.8612778782844543  |
| node_99: feature_name=cg18749563             | feature_id[3838].value <=<br>threshold=0.9820527732372284 |
| Class: alveolar rhabdomyosarcoma (RMS (ALV)) |                                                           |
|                                              |                                                           |
| Rules_166                                    | passed counts:1                                           |
| node_0: feature_name=cg11915444              | feature_id[1171].value ><br>threshold=0.3402601182460785  |
| node_10: feature_name=cg12109728             | feature_id[2810].value ><br>threshold=0.7068270146846771  |
| node_20: feature_name=cg16412000             | feature_id[789].value ><br>threshold=0.6741803884506226   |
| node_24: feature_name=cg17115147             | feature_id[1434].value <=<br>threshold=0.2961975038051605 |
| node_25: feature_name=cg24474622             | feature_id[2737].value ><br>threshold=0.7211934924125671  |
| node_29: feature_name=cg10472711             | feature_id[612].value ><br>threshold=0.45985929667949677  |
| node_37: feature_name=cg01937669             | feature_id[188].value <=<br>threshold=0.4809463769197464  |

|                                                       |                                                            |
|-------------------------------------------------------|------------------------------------------------------------|
| node_38: feature_name=cg02157052                      | feature_id[451].value <=<br>threshold=0.2869153320789337   |
| node_39: feature_name=cg18751958                      | feature_id[1427].value ><br>threshold=0.4813787043094635   |
| node_41: feature_name=cg22512847                      | feature_id[1152].value ><br>threshold=0.5129324495792389   |
| node_43: feature_name=cg23345038                      | feature_id[1147].value ><br>threshold=0.6318148374557495   |
| node_45: feature_name=cg17439009                      | feature_id[1815].value <=<br>threshold=0.48514117300510406 |
| node_46: feature_name=cg17537493                      | feature_id[2772].value ><br>threshold=0.5825372636318207   |
| node_52: feature_name=cg01683570                      | feature_id[110].value ><br>threshold=0.6040188074111938    |
| node_54: feature_name=cg15720017                      | feature_id[168].value ><br>threshold=0.7067741453647614    |
| node_60: feature_name=cg23690444                      | feature_id[120].value <=<br>threshold=0.16037724912166595  |
| node_61: feature_name=cg00567872                      | feature_id[236].value ><br>threshold=0.7005765736103058    |
| node_85: feature_name=cg01014262                      | feature_id[764].value <=<br>threshold=0.5737917125225067   |
| node_86: feature_name=cg22946562                      | feature_id[1148].value <=<br>threshold=0.6328203976154327  |
| node_87: feature_name=cg18120975                      | feature_id[2767].value ><br>threshold=0.7081544995307922   |
| node_91: feature_name=cg17171539                      | feature_id[25].value <=<br>threshold=0.501024603843689     |
| node_92: feature_name=cg00007036                      | feature_id[1586].value <=<br>threshold=0.943472146987915   |
| node_93: feature_name=cg16570314                      | feature_id[479].value <=<br>threshold=0.7333994507789612   |
| node_94: feature_name=cg15117891                      | feature_id[2220].value <=<br>threshold=0.9664478302001953  |
| node_95: feature_name=cg00967711                      | feature_id[414].value ><br>threshold=0.22273091971874237   |
| node_97: feature_name=cg08642081                      | feature_id[2259].value <=<br>threshold=0.8612778782844543  |
| Class: high-grade conventional osteosarcoma (OS (HG)) |                                                            |
|                                                       |                                                            |
| Rules_167                                             | passed counts:1                                            |



|                                  |                                                            |
|----------------------------------|------------------------------------------------------------|
| node_0: feature_name=cg11915444  | feature_id[1171].value ><br>threshold=0.3402601182460785   |
| node_10: feature_name=cg12109728 | feature_id[2810].value ><br>threshold=0.7068270146846771   |
| node_20: feature_name=cg16412000 | feature_id[789].value ><br>threshold=0.6741803884506226    |
| node_24: feature_name=cg17115147 | feature_id[1434].value <=<br>threshold=0.2961975038051605  |
| node_25: feature_name=cg24474622 | feature_id[2737].value ><br>threshold=0.7211934924125671   |
| node_29: feature_name=cg10472711 | feature_id[612].value ><br>threshold=0.45985929667949677   |
| node_37: feature_name=cg01937669 | feature_id[188].value <=<br>threshold=0.4809463769197464   |
| node_38: feature_name=cg02157052 | feature_id[451].value <=<br>threshold=0.2869153320789337   |
| node_39: feature_name=cg18751958 | feature_id[1427].value ><br>threshold=0.4813787043094635   |
| node_41: feature_name=cg22512847 | feature_id[1152].value ><br>threshold=0.5129324495792389   |
| node_43: feature_name=cg23345038 | feature_id[1147].value ><br>threshold=0.6318148374557495   |
| node_45: feature_name=cg17439009 | feature_id[1815].value <=<br>threshold=0.48514117300510406 |
| node_46: feature_name=cg17537493 | feature_id[2772].value ><br>threshold=0.5825372636318207   |
| node_52: feature_name=cg01683570 | feature_id[110].value ><br>threshold=0.6040188074111938    |
| node_54: feature_name=cg15720017 | feature_id[168].value ><br>threshold=0.7067741453647614    |
| node_60: feature_name=cg23690444 | feature_id[120].value <=<br>threshold=0.16037724912166595  |
| node_61: feature_name=cg00567872 | feature_id[236].value ><br>threshold=0.7005765736103058    |
| node_85: feature_name=cg01014262 | feature_id[764].value <=<br>threshold=0.5737917125225067   |
| node_86: feature_name=cg22946562 | feature_id[1148].value <=<br>threshold=0.6328203976154327  |
| node_87: feature_name=cg18120975 | feature_id[2767].value <=<br>threshold=0.7081544995307922  |
| node_88: feature_name=cg15592324 | feature_id[383].value ><br>threshold=0.9721506536006927    |
| Class: chondroblastoma (CB)      |                                                            |

|                                  |                                                            |
|----------------------------------|------------------------------------------------------------|
|                                  |                                                            |
| Rules_168                        | passed counts:1                                            |
| node_0: feature_name=cg11915444  | feature_id[1171].value ><br>threshold=0.3402601182460785   |
| node_10: feature_name=cg12109728 | feature_id[2810].value ><br>threshold=0.7068270146846771   |
| node_20: feature_name=cg16412000 | feature_id[789].value ><br>threshold=0.6741803884506226    |
| node_24: feature_name=cg17115147 | feature_id[1434].value <=<br>threshold=0.2961975038051605  |
| node_25: feature_name=cg24474622 | feature_id[2737].value ><br>threshold=0.7211934924125671   |
| node_29: feature_name=cg10472711 | feature_id[612].value ><br>threshold=0.45985929667949677   |
| node_37: feature_name=cg01937669 | feature_id[188].value <=<br>threshold=0.4809463769197464   |
| node_38: feature_name=cg02157052 | feature_id[451].value <=<br>threshold=0.2869153320789337   |
| node_39: feature_name=cg18751958 | feature_id[1427].value ><br>threshold=0.4813787043094635   |
| node_41: feature_name=cg22512847 | feature_id[1152].value ><br>threshold=0.5129324495792389   |
| node_43: feature_name=cg23345038 | feature_id[1147].value ><br>threshold=0.6318148374557495   |
| node_45: feature_name=cg17439009 | feature_id[1815].value <=<br>threshold=0.48514117300510406 |
| node_46: feature_name=cg17537493 | feature_id[2772].value ><br>threshold=0.5825372636318207   |
| node_52: feature_name=cg01683570 | feature_id[110].value ><br>threshold=0.6040188074111938    |
| node_54: feature_name=cg15720017 | feature_id[168].value ><br>threshold=0.7067741453647614    |
| node_60: feature_name=cg23690444 | feature_id[120].value <=<br>threshold=0.16037724912166595  |
| node_61: feature_name=cg00567872 | feature_id[236].value <=<br>threshold=0.7005765736103058   |
| node_62: feature_name=cg09293488 | feature_id[2629].value ><br>threshold=0.839823454618454    |
| node_68: feature_name=cg04838832 | feature_id[1184].value <=<br>threshold=0.41919413208961487 |
| node_69: feature_name=cg18153137 | feature_id[2198].value <=<br>threshold=0.08548648655414581 |

|                                               |                                                            |
|-----------------------------------------------|------------------------------------------------------------|
| node_70: feature_name=cg18273464              | feature_id[2051].value ><br>threshold=0.8000432550907135   |
| node_72: feature_name=cg18241094              | feature_id[2373].value ><br>threshold=0.3435447886586189   |
| node_74: feature_name=cg23251296              | feature_id[2342].value ><br>threshold=0.36987772583961487  |
| node_76: feature_name=cg05477920              | feature_id[483].value ><br>threshold=0.8196498453617096    |
| node_78: feature_name=cg12092201              | feature_id[1067].value ><br>threshold=0.05550734885036945  |
| node_80: feature_name=cg21450547              | feature_id[439].value ><br>threshold=0.1863430291414261    |
| Class: embryonal rhabdomyosarcoma (RMS (EMB)) |                                                            |
|                                               |                                                            |
| Rules_169                                     | passed counts:1                                            |
| node_0: feature_name=cg11915444               | feature_id[1171].value ><br>threshold=0.3402601182460785   |
| node_10: feature_name=cg12109728              | feature_id[2810].value ><br>threshold=0.7068270146846771   |
| node_20: feature_name=cg16412000              | feature_id[789].value ><br>threshold=0.6741803884506226    |
| node_24: feature_name=cg17115147              | feature_id[1434].value <=<br>threshold=0.2961975038051605  |
| node_25: feature_name=cg24474622              | feature_id[2737].value ><br>threshold=0.7211934924125671   |
| node_29: feature_name=cg10472711              | feature_id[612].value ><br>threshold=0.45985929667949677   |
| node_37: feature_name=cg01937669              | feature_id[188].value <=<br>threshold=0.4809463769197464   |
| node_38: feature_name=cg02157052              | feature_id[451].value <=<br>threshold=0.2869153320789337   |
| node_39: feature_name=cg18751958              | feature_id[1427].value ><br>threshold=0.4813787043094635   |
| node_41: feature_name=cg22512847              | feature_id[1152].value ><br>threshold=0.5129324495792389   |
| node_43: feature_name=cg23345038              | feature_id[1147].value ><br>threshold=0.6318148374557495   |
| node_45: feature_name=cg17439009              | feature_id[1815].value <=<br>threshold=0.48514117300510406 |
| node_46: feature_name=cg17537493              | feature_id[2772].value ><br>threshold=0.5825372636318207   |

|                                               |                                                            |
|-----------------------------------------------|------------------------------------------------------------|
| node_52: feature_name=cg01683570              | feature_id[110].value ><br>threshold=0.6040188074111938    |
| node_54: feature_name=cg15720017              | feature_id[168].value ><br>threshold=0.7067741453647614    |
| node_60: feature_name=cg23690444              | feature_id[120].value <=<br>threshold=0.16037724912166595  |
| node_61: feature_name=cg00567872              | feature_id[236].value <=<br>threshold=0.7005765736103058   |
| node_62: feature_name=cg09293488              | feature_id[2629].value ><br>threshold=0.839823454618454    |
| node_68: feature_name=cg04838832              | feature_id[1184].value <=<br>threshold=0.41919413208961487 |
| node_69: feature_name=cg18153137              | feature_id[2198].value <=<br>threshold=0.08548648655414581 |
| node_70: feature_name=cg18273464              | feature_id[2051].value ><br>threshold=0.8000432550907135   |
| node_72: feature_name=cg18241094              | feature_id[2373].value ><br>threshold=0.3435447886586189   |
| node_74: feature_name=cg23251296              | feature_id[2342].value ><br>threshold=0.36987772583961487  |
| node_76: feature_name=cg05477920              | feature_id[483].value ><br>threshold=0.8196498453617096    |
| node_78: feature_name=cg12092201              | feature_id[1067].value ><br>threshold=0.05550734885036945  |
| node_80: feature_name=cg21450547              | feature_id[439].value <=<br>threshold=0.1863430291414261   |
| Class: angiomatoid fibrous histiocytoma (AFH) |                                                            |
|                                               |                                                            |
| Rules_170                                     | passed counts:1                                            |
| node_0: feature_name=cg11915444               | feature_id[1171].value ><br>threshold=0.3402601182460785   |
| node_10: feature_name=cg12109728              | feature_id[2810].value ><br>threshold=0.7068270146846771   |
| node_20: feature_name=cg16412000              | feature_id[789].value ><br>threshold=0.6741803884506226    |
| node_24: feature_name=cg17115147              | feature_id[1434].value <=<br>threshold=0.2961975038051605  |
| node_25: feature_name=cg24474622              | feature_id[2737].value ><br>threshold=0.7211934924125671   |
| node_29: feature_name=cg10472711              | feature_id[612].value ><br>threshold=0.45985929667949677   |
| node_37: feature_name=cg01937669              | feature_id[188].value <=<br>threshold=0.4809463769197464   |

|                                  |                                                            |
|----------------------------------|------------------------------------------------------------|
| node_38: feature_name=cg02157052 | feature_id[451].value <=<br>threshold=0.2869153320789337   |
| node_39: feature_name=cg18751958 | feature_id[1427].value ><br>threshold=0.4813787043094635   |
| node_41: feature_name=cg22512847 | feature_id[1152].value ><br>threshold=0.5129324495792389   |
| node_43: feature_name=cg23345038 | feature_id[1147].value ><br>threshold=0.6318148374557495   |
| node_45: feature_name=cg17439009 | feature_id[1815].value <=<br>threshold=0.48514117300510406 |
| node_46: feature_name=cg17537493 | feature_id[2772].value ><br>threshold=0.5825372636318207   |
| node_52: feature_name=cg01683570 | feature_id[110].value ><br>threshold=0.6040188074111938    |
| node_54: feature_name=cg15720017 | feature_id[168].value ><br>threshold=0.7067741453647614    |
| node_60: feature_name=cg23690444 | feature_id[120].value <=<br>threshold=0.16037724912166595  |
| node_61: feature_name=cg00567872 | feature_id[236].value <=<br>threshold=0.7005765736103058   |
| node_62: feature_name=cg09293488 | feature_id[2629].value ><br>threshold=0.839823454618454    |
| node_68: feature_name=cg04838832 | feature_id[1184].value <=<br>threshold=0.41919413208961487 |
| node_69: feature_name=cg18153137 | feature_id[2198].value <=<br>threshold=0.08548648655414581 |
| node_70: feature_name=cg18273464 | feature_id[2051].value ><br>threshold=0.8000432550907135   |
| node_72: feature_name=cg18241094 | feature_id[2373].value ><br>threshold=0.3435447886586189   |
| node_74: feature_name=cg23251296 | feature_id[2342].value ><br>threshold=0.36987772583961487  |
| node_76: feature_name=cg05477920 | feature_id[483].value ><br>threshold=0.8196498453617096    |
| node_78: feature_name=cg12092201 | feature_id[1067].value <=<br>threshold=0.05550734885036945 |
| Class: rhabdomyosarcoma (RMS)    |                                                            |
|                                  |                                                            |
| Rules_171                        | passed counts:1                                            |
| node_0: feature_name=cg11915444  | feature_id[1171].value ><br>threshold=0.3402601182460785   |
| node_10: feature_name=cg12109728 | feature_id[2810].value ><br>threshold=0.7068270146846771   |

|                                  |                                                            |
|----------------------------------|------------------------------------------------------------|
| node_20: feature_name=cg16412000 | feature_id[789].value ><br>threshold=0.6741803884506226    |
| node_24: feature_name=cg17115147 | feature_id[1434].value <=<br>threshold=0.2961975038051605  |
| node_25: feature_name=cg24474622 | feature_id[2737].value ><br>threshold=0.7211934924125671   |
| node_29: feature_name=cg10472711 | feature_id[612].value ><br>threshold=0.45985929667949677   |
| node_37: feature_name=cg01937669 | feature_id[188].value <=<br>threshold=0.4809463769197464   |
| node_38: feature_name=cg02157052 | feature_id[451].value <=<br>threshold=0.2869153320789337   |
| node_39: feature_name=cg18751958 | feature_id[1427].value ><br>threshold=0.4813787043094635   |
| node_41: feature_name=cg22512847 | feature_id[1152].value ><br>threshold=0.5129324495792389   |
| node_43: feature_name=cg23345038 | feature_id[1147].value ><br>threshold=0.6318148374557495   |
| node_45: feature_name=cg17439009 | feature_id[1815].value <=<br>threshold=0.48514117300510406 |
| node_46: feature_name=cg17537493 | feature_id[2772].value ><br>threshold=0.5825372636318207   |
| node_52: feature_name=cg01683570 | feature_id[110].value ><br>threshold=0.6040188074111938    |
| node_54: feature_name=cg15720017 | feature_id[168].value ><br>threshold=0.7067741453647614    |
| node_60: feature_name=cg23690444 | feature_id[120].value <=<br>threshold=0.16037724912166595  |
| node_61: feature_name=cg00567872 | feature_id[236].value <=<br>threshold=0.7005765736103058   |
| node_62: feature_name=cg09293488 | feature_id[2629].value ><br>threshold=0.839823454618454    |
| node_68: feature_name=cg04838832 | feature_id[1184].value <=<br>threshold=0.41919413208961487 |
| node_69: feature_name=cg18153137 | feature_id[2198].value <=<br>threshold=0.08548648655414581 |
| node_70: feature_name=cg18273464 | feature_id[2051].value ><br>threshold=0.8000432550907135   |
| node_72: feature_name=cg18241094 | feature_id[2373].value ><br>threshold=0.3435447886586189   |
| node_74: feature_name=cg23251296 | feature_id[2342].value ><br>threshold=0.36987772583961487  |
| node_76: feature_name=cg05477920 | feature_id[483].value <=<br>threshold=0.8196498453617096   |

|                                              |                                                            |
|----------------------------------------------|------------------------------------------------------------|
| Class: alveolar rhabdomyosarcoma (RMS (ALV)) |                                                            |
|                                              |                                                            |
| Rules_172                                    | passed counts:1                                            |
| node_0: feature_name=cg11915444              | feature_id[1171].value ><br>threshold=0.3402601182460785   |
| node_10: feature_name=cg12109728             | feature_id[2810].value ><br>threshold=0.7068270146846771   |
| node_20: feature_name=cg16412000             | feature_id[789].value ><br>threshold=0.6741803884506226    |
| node_24: feature_name=cg17115147             | feature_id[1434].value <=<br>threshold=0.2961975038051605  |
| node_25: feature_name=cg24474622             | feature_id[2737].value ><br>threshold=0.7211934924125671   |
| node_29: feature_name=cg10472711             | feature_id[612].value ><br>threshold=0.45985929667949677   |
| node_37: feature_name=cg01937669             | feature_id[188].value <=<br>threshold=0.4809463769197464   |
| node_38: feature_name=cg02157052             | feature_id[451].value <=<br>threshold=0.2869153320789337   |
| node_39: feature_name=cg18751958             | feature_id[1427].value ><br>threshold=0.4813787043094635   |
| node_41: feature_name=cg22512847             | feature_id[1152].value ><br>threshold=0.5129324495792389   |
| node_43: feature_name=cg23345038             | feature_id[1147].value ><br>threshold=0.6318148374557495   |
| node_45: feature_name=cg17439009             | feature_id[1815].value <=<br>threshold=0.48514117300510406 |
| node_46: feature_name=cg17537493             | feature_id[2772].value ><br>threshold=0.5825372636318207   |
| node_52: feature_name=cg01683570             | feature_id[110].value ><br>threshold=0.6040188074111938    |
| node_54: feature_name=cg15720017             | feature_id[168].value ><br>threshold=0.7067741453647614    |
| node_60: feature_name=cg23690444             | feature_id[120].value <=<br>threshold=0.16037724912166595  |
| node_61: feature_name=cg00567872             | feature_id[236].value <=<br>threshold=0.7005765736103058   |
| node_62: feature_name=cg09293488             | feature_id[2629].value ><br>threshold=0.839823454618454    |
| node_68: feature_name=cg04838832             | feature_id[1184].value <=<br>threshold=0.41919413208961487 |

|                                  |                                                            |
|----------------------------------|------------------------------------------------------------|
| node_69: feature_name=cg18153137 | feature_id[2198].value <=<br>threshold=0.08548648655414581 |
| node_70: feature_name=cg18273464 | feature_id[2051].value ><br>threshold=0.8000432550907135   |
| node_72: feature_name=cg18241094 | feature_id[2373].value ><br>threshold=0.3435447886586189   |
| node_74: feature_name=cg23251296 | feature_id[2342].value <=<br>threshold=0.36987772583961487 |
| Class: sarcoma (SARC)            |                                                            |
|                                  |                                                            |
| Rules_173                        | passed counts:1                                            |
| node_0: feature_name=cg11915444  | feature_id[1171].value ><br>threshold=0.3402601182460785   |
| node_10: feature_name=cg12109728 | feature_id[2810].value ><br>threshold=0.7068270146846771   |
| node_20: feature_name=cg16412000 | feature_id[789].value ><br>threshold=0.6741803884506226    |
| node_24: feature_name=cg17115147 | feature_id[1434].value <=<br>threshold=0.2961975038051605  |
| node_25: feature_name=cg24474622 | feature_id[2737].value ><br>threshold=0.7211934924125671   |
| node_29: feature_name=cg10472711 | feature_id[612].value ><br>threshold=0.45985929667949677   |
| node_37: feature_name=cg01937669 | feature_id[188].value <=<br>threshold=0.4809463769197464   |
| node_38: feature_name=cg02157052 | feature_id[451].value <=<br>threshold=0.2869153320789337   |
| node_39: feature_name=cg18751958 | feature_id[1427].value ><br>threshold=0.4813787043094635   |
| node_41: feature_name=cg22512847 | feature_id[1152].value ><br>threshold=0.5129324495792389   |
| node_43: feature_name=cg23345038 | feature_id[1147].value ><br>threshold=0.6318148374557495   |
| node_45: feature_name=cg17439009 | feature_id[1815].value <=<br>threshold=0.48514117300510406 |
| node_46: feature_name=cg17537493 | feature_id[2772].value ><br>threshold=0.5825372636318207   |
| node_52: feature_name=cg01683570 | feature_id[110].value ><br>threshold=0.6040188074111938    |
| node_54: feature_name=cg15720017 | feature_id[168].value ><br>threshold=0.7067741453647614    |
| node_60: feature_name=cg23690444 | feature_id[120].value <=<br>threshold=0.16037724912166595  |



|                                         |                                                            |
|-----------------------------------------|------------------------------------------------------------|
| node_61: feature_name=cg00567872        | feature_id[236].value <=<br>threshold=0.7005765736103058   |
| node_62: feature_name=cg09293488        | feature_id[2629].value ><br>threshold=0.839823454618454    |
| node_68: feature_name=cg04838832        | feature_id[1184].value <=<br>threshold=0.41919413208961487 |
| node_69: feature_name=cg18153137        | feature_id[2198].value <=<br>threshold=0.08548648655414581 |
| node_70: feature_name=cg18273464        | feature_id[2051].value ><br>threshold=0.8000432550907135   |
| node_72: feature_name=cg18241094        | feature_id[2373].value <=<br>threshold=0.3435447886586189  |
| Class: undifferentiated sarcoma (USARC) |                                                            |
|                                         |                                                            |
| Rules_174                               | passed counts:1                                            |
| node_0: feature_name=cg11915444         | feature_id[1171].value ><br>threshold=0.3402601182460785   |
| node_10: feature_name=cg12109728        | feature_id[2810].value ><br>threshold=0.7068270146846771   |
| node_20: feature_name=cg16412000        | feature_id[789].value ><br>threshold=0.6741803884506226    |
| node_24: feature_name=cg17115147        | feature_id[1434].value <=<br>threshold=0.2961975038051605  |
| node_25: feature_name=cg24474622        | feature_id[2737].value ><br>threshold=0.7211934924125671   |
| node_29: feature_name=cg10472711        | feature_id[612].value ><br>threshold=0.45985929667949677   |
| node_37: feature_name=cg01937669        | feature_id[188].value <=<br>threshold=0.4809463769197464   |
| node_38: feature_name=cg02157052        | feature_id[451].value <=<br>threshold=0.2869153320789337   |
| node_39: feature_name=cg18751958        | feature_id[1427].value ><br>threshold=0.4813787043094635   |
| node_41: feature_name=cg22512847        | feature_id[1152].value ><br>threshold=0.5129324495792389   |
| node_43: feature_name=cg23345038        | feature_id[1147].value ><br>threshold=0.6318148374557495   |
| node_45: feature_name=cg17439009        | feature_id[1815].value <=<br>threshold=0.48514117300510406 |
| node_46: feature_name=cg17537493        | feature_id[2772].value ><br>threshold=0.5825372636318207   |
| node_52: feature_name=cg01683570        | feature_id[110].value ><br>threshold=0.6040188074111938    |

|                                                                                   |                                                            |
|-----------------------------------------------------------------------------------|------------------------------------------------------------|
| node_54: feature_name=cg15720017                                                  | feature_id[168].value ><br>threshold=0.7067741453647614    |
| node_60: feature_name=cg23690444                                                  | feature_id[120].value <=<br>threshold=0.16037724912166595  |
| node_61: feature_name=cg00567872                                                  | feature_id[236].value <=<br>threshold=0.7005765736103058   |
| node_62: feature_name=cg09293488                                                  | feature_id[2629].value ><br>threshold=0.839823454618454    |
| node_68: feature_name=cg04838832                                                  | feature_id[1184].value <=<br>threshold=0.41919413208961487 |
| node_69: feature_name=cg18153137                                                  | feature_id[2198].value <=<br>threshold=0.08548648655414581 |
| node_70: feature_name=cg18273464                                                  | feature_id[2051].value <=<br>threshold=0.8000432550907135  |
| Class: well differentiated liposarcoma (WDLS)/dedifferentiated liposarcoma (DDLs) |                                                            |
|                                                                                   |                                                            |
| Rules_175                                                                         | passed counts:1                                            |
| node_0: feature_name=cg11915444                                                   | feature_id[1171].value ><br>threshold=0.3402601182460785   |
| node_10: feature_name=cg12109728                                                  | feature_id[2810].value ><br>threshold=0.7068270146846771   |
| node_20: feature_name=cg16412000                                                  | feature_id[789].value ><br>threshold=0.6741803884506226    |
| node_24: feature_name=cg17115147                                                  | feature_id[1434].value <=<br>threshold=0.2961975038051605  |
| node_25: feature_name=cg24474622                                                  | feature_id[2737].value ><br>threshold=0.7211934924125671   |
| node_29: feature_name=cg10472711                                                  | feature_id[612].value ><br>threshold=0.45985929667949677   |
| node_37: feature_name=cg01937669                                                  | feature_id[188].value <=<br>threshold=0.4809463769197464   |
| node_38: feature_name=cg02157052                                                  | feature_id[451].value <=<br>threshold=0.2869153320789337   |
| node_39: feature_name=cg18751958                                                  | feature_id[1427].value ><br>threshold=0.4813787043094635   |
| node_41: feature_name=cg22512847                                                  | feature_id[1152].value ><br>threshold=0.5129324495792389   |
| node_43: feature_name=cg23345038                                                  | feature_id[1147].value ><br>threshold=0.6318148374557495   |
| node_45: feature_name=cg17439009                                                  | feature_id[1815].value <=<br>threshold=0.48514117300510406 |

|                                              |                                                           |
|----------------------------------------------|-----------------------------------------------------------|
| node_46: feature_name=cg17537493             | feature_id[2772].value ><br>threshold=0.5825372636318207  |
| node_52: feature_name=cg01683570             | feature_id[110].value ><br>threshold=0.6040188074111938   |
| node_54: feature_name=cg15720017             | feature_id[168].value ><br>threshold=0.7067741453647614   |
| node_60: feature_name=cg23690444             | feature_id[120].value <=<br>threshold=0.16037724912166595 |
| node_61: feature_name=cg00567872             | feature_id[236].value <=<br>threshold=0.7005765736103058  |
| node_62: feature_name=cg09293488             | feature_id[2629].value <=<br>threshold=0.839823454618454  |
| node_63: feature_name=cg19201770             | feature_id[2194].value <=<br>threshold=0.5603366196155548 |
| node_64: feature_name=cg16172837             | feature_id[1925].value ><br>threshold=0.06044276803731918 |
| Class: alveolar rhabdomyosarcoma (RMS (ALV)) |                                                           |
|                                              |                                                           |
| Rules_176                                    | passed counts:1                                           |
| node_0: feature_name=cg11915444              | feature_id[1171].value ><br>threshold=0.3402601182460785  |
| node_10: feature_name=cg12109728             | feature_id[2810].value ><br>threshold=0.7068270146846771  |
| node_20: feature_name=cg16412000             | feature_id[789].value ><br>threshold=0.6741803884506226   |
| node_24: feature_name=cg17115147             | feature_id[1434].value <=<br>threshold=0.2961975038051605 |
| node_25: feature_name=cg24474622             | feature_id[2737].value ><br>threshold=0.7211934924125671  |
| node_29: feature_name=cg10472711             | feature_id[612].value ><br>threshold=0.45985929667949677  |
| node_37: feature_name=cg01937669             | feature_id[188].value <=<br>threshold=0.4809463769197464  |
| node_38: feature_name=cg02157052             | feature_id[451].value <=<br>threshold=0.2869153320789337  |
| node_39: feature_name=cg18751958             | feature_id[1427].value ><br>threshold=0.4813787043094635  |
| node_41: feature_name=cg22512847             | feature_id[1152].value ><br>threshold=0.5129324495792389  |
| node_43: feature_name=cg23345038             | feature_id[1147].value ><br>threshold=0.6318148374557495  |

|                                         |                                                            |
|-----------------------------------------|------------------------------------------------------------|
| node_45: feature_name=cg17439009        | feature_id[1815].value <=<br>threshold=0.48514117300510406 |
| node_46: feature_name=cg17537493        | feature_id[2772].value ><br>threshold=0.5825372636318207   |
| node_52: feature_name=cg01683570        | feature_id[110].value ><br>threshold=0.6040188074111938    |
| node_54: feature_name=cg15720017        | feature_id[168].value ><br>threshold=0.7067741453647614    |
| node_60: feature_name=cg23690444        | feature_id[120].value <=<br>threshold=0.16037724912166595  |
| node_61: feature_name=cg00567872        | feature_id[236].value <=<br>threshold=0.7005765736103058   |
| node_62: feature_name=cg09293488        | feature_id[2629].value <=<br>threshold=0.839823454618454   |
| node_63: feature_name=cg19201770        | feature_id[2194].value <=<br>threshold=0.5603366196155548  |
| node_64: feature_name=cg16172837        | feature_id[1925].value <=<br>threshold=0.06044276803731918 |
| Class: undifferentiated sarcoma (USARC) |                                                            |
|                                         |                                                            |
| Rules_177                               | passed counts:1                                            |
| node_0: feature_name=cg11915444         | feature_id[1171].value ><br>threshold=0.3402601182460785   |
| node_10: feature_name=cg12109728        | feature_id[2810].value ><br>threshold=0.7068270146846771   |
| node_20: feature_name=cg16412000        | feature_id[789].value ><br>threshold=0.6741803884506226    |
| node_24: feature_name=cg17115147        | feature_id[1434].value <=<br>threshold=0.2961975038051605  |
| node_25: feature_name=cg24474622        | feature_id[2737].value ><br>threshold=0.7211934924125671   |
| node_29: feature_name=cg10472711        | feature_id[612].value ><br>threshold=0.45985929667949677   |
| node_37: feature_name=cg01937669        | feature_id[188].value <=<br>threshold=0.4809463769197464   |
| node_38: feature_name=cg02157052        | feature_id[451].value <=<br>threshold=0.2869153320789337   |
| node_39: feature_name=cg18751958        | feature_id[1427].value ><br>threshold=0.4813787043094635   |
| node_41: feature_name=cg22512847        | feature_id[1152].value ><br>threshold=0.5129324495792389   |
| node_43: feature_name=cg23345038        | feature_id[1147].value ><br>threshold=0.6318148374557495   |

|                                                  |                                                            |
|--------------------------------------------------|------------------------------------------------------------|
| node_45: feature_name=cg17439009                 | feature_id[1815].value <=<br>threshold=0.48514117300510406 |
| node_46: feature_name=cg17537493                 | feature_id[2772].value ><br>threshold=0.5825372636318207   |
| node_52: feature_name=cg01683570                 | feature_id[110].value ><br>threshold=0.6040188074111938    |
| node_54: feature_name=cg15720017                 | feature_id[168].value <=<br>threshold=0.7067741453647614   |
| node_55: feature_name=cg17216243                 | feature_id[1006].value <=<br>threshold=0.48612095415592194 |
| node_56: feature_name=cg21863499                 | feature_id[2551].value ><br>threshold=0.11701266095042229  |
| Class: mesenchymal chondrosarcoma (CSA<br>(MES)) |                                                            |
|                                                  |                                                            |
| Rules_178                                        | passed counts:1                                            |
| node_0: feature_name=cg11915444                  | feature_id[1171].value ><br>threshold=0.3402601182460785   |
| node_10: feature_name=cg12109728                 | feature_id[2810].value ><br>threshold=0.7068270146846771   |
| node_20: feature_name=cg16412000                 | feature_id[789].value ><br>threshold=0.6741803884506226    |
| node_24: feature_name=cg17115147                 | feature_id[1434].value <=<br>threshold=0.2961975038051605  |
| node_25: feature_name=cg24474622                 | feature_id[2737].value ><br>threshold=0.7211934924125671   |
| node_29: feature_name=cg10472711                 | feature_id[612].value ><br>threshold=0.45985929667949677   |
| node_37: feature_name=cg01937669                 | feature_id[188].value <=<br>threshold=0.4809463769197464   |
| node_38: feature_name=cg02157052                 | feature_id[451].value <=<br>threshold=0.2869153320789337   |
| node_39: feature_name=cg18751958                 | feature_id[1427].value ><br>threshold=0.4813787043094635   |
| node_41: feature_name=cg22512847                 | feature_id[1152].value ><br>threshold=0.5129324495792389   |
| node_43: feature_name=cg23345038                 | feature_id[1147].value ><br>threshold=0.6318148374557495   |
| node_45: feature_name=cg17439009                 | feature_id[1815].value <=<br>threshold=0.48514117300510406 |
| node_46: feature_name=cg17537493                 | feature_id[2772].value ><br>threshold=0.5825372636318207   |

|                                                |                                                            |
|------------------------------------------------|------------------------------------------------------------|
| node_52: feature_name=cg01683570               | feature_id[110].value ><br>threshold=0.6040188074111938    |
| node_54: feature_name=cg15720017               | feature_id[168].value <=<br>threshold=0.7067741453647614   |
| node_55: feature_name=cg17216243               | feature_id[1006].value <=<br>threshold=0.48612095415592194 |
| node_56: feature_name=cg21863499               | feature_id[2551].value <=<br>threshold=0.11701266095042229 |
| Class: gastrointestinal stromal tumour (GIST)  |                                                            |
|                                                |                                                            |
| Rules_179                                      | passed counts:1                                            |
| node_0: feature_name=cg11915444                | feature_id[1171].value ><br>threshold=0.3402601182460785   |
| node_10: feature_name=cg12109728               | feature_id[2810].value ><br>threshold=0.7068270146846771   |
| node_20: feature_name=cg16412000               | feature_id[789].value ><br>threshold=0.6741803884506226    |
| node_24: feature_name=cg17115147               | feature_id[1434].value <=<br>threshold=0.2961975038051605  |
| node_25: feature_name=cg24474622               | feature_id[2737].value ><br>threshold=0.7211934924125671   |
| node_29: feature_name=cg10472711               | feature_id[612].value ><br>threshold=0.45985929667949677   |
| node_37: feature_name=cg01937669               | feature_id[188].value <=<br>threshold=0.4809463769197464   |
| node_38: feature_name=cg02157052               | feature_id[451].value <=<br>threshold=0.2869153320789337   |
| node_39: feature_name=cg18751958               | feature_id[1427].value ><br>threshold=0.4813787043094635   |
| node_41: feature_name=cg22512847               | feature_id[1152].value ><br>threshold=0.5129324495792389   |
| node_43: feature_name=cg23345038               | feature_id[1147].value ><br>threshold=0.6318148374557495   |
| node_45: feature_name=cg17439009               | feature_id[1815].value <=<br>threshold=0.48514117300510406 |
| node_46: feature_name=cg17537493               | feature_id[2772].value <=<br>threshold=0.5825372636318207  |
| node_47: feature_name=cg16572224               | feature_id[2780].value <=<br>threshold=0.6722612977027893  |
| node_48: feature_name=cg00760872               | feature_id[2909].value ><br>threshold=0.46596916019916534  |
| Class: epithelioid haemangioendothelioma (EHE) |                                                            |
|                                                |                                                            |

|                                                 |                                                           |
|-------------------------------------------------|-----------------------------------------------------------|
| Rules_180                                       | passed counts:1                                           |
| node_0: feature_name=cg11915444                 | feature_id[1171].value ><br>threshold=0.3402601182460785  |
| node_10: feature_name=cg12109728                | feature_id[2810].value ><br>threshold=0.7068270146846771  |
| node_20: feature_name=cg16412000                | feature_id[789].value ><br>threshold=0.6741803884506226   |
| node_24: feature_name=cg17115147                | feature_id[1434].value <=<br>threshold=0.2961975038051605 |
| node_25: feature_name=cg24474622                | feature_id[2737].value ><br>threshold=0.7211934924125671  |
| node_29: feature_name=cg10472711                | feature_id[612].value <=<br>threshold=0.45985929667949677 |
| node_30: feature_name=cg06132803                | feature_id[3655].value <=<br>threshold=0.420499712228775  |
| node_31: feature_name=cg04248332                | feature_id[3387].value <=<br>threshold=0.6364206075668335 |
| node_32: feature_name=cg05951828                | feature_id[350].value ><br>threshold=0.8983565866947174   |
| Class: sclerosing epithelioid fibrosarcoma(SEF) |                                                           |
|                                                 |                                                           |
| Rules_181                                       | passed counts:1                                           |
| node_0: feature_name=cg11915444                 | feature_id[1171].value ><br>threshold=0.3402601182460785  |
| node_10: feature_name=cg12109728                | feature_id[2810].value ><br>threshold=0.7068270146846771  |
| node_20: feature_name=cg16412000                | feature_id[789].value ><br>threshold=0.6741803884506226   |
| node_24: feature_name=cg17115147                | feature_id[1434].value <=<br>threshold=0.2961975038051605 |
| node_25: feature_name=cg24474622                | feature_id[2737].value ><br>threshold=0.7211934924125671  |
| node_29: feature_name=cg10472711                | feature_id[612].value <=<br>threshold=0.45985929667949677 |
| node_30: feature_name=cg06132803                | feature_id[3655].value <=<br>threshold=0.420499712228775  |
| node_31: feature_name=cg04248332                | feature_id[3387].value <=<br>threshold=0.6364206075668335 |
| node_32: feature_name=cg05951828                | feature_id[350].value <=<br>threshold=0.8983565866947174  |
| Class: solitary fibrous tumour (SFT)            |                                                           |
|                                                 |                                                           |
| Rules_182                                       | passed counts:1                                           |

|                                               |                                                           |
|-----------------------------------------------|-----------------------------------------------------------|
| node_0: feature_name=cg11915444               | feature_id[1171].value ><br>threshold=0.3402601182460785  |
| node_10: feature_name=cg12109728              | feature_id[2810].value ><br>threshold=0.7068270146846771  |
| node_20: feature_name=cg16412000              | feature_id[789].value ><br>threshold=0.6741803884506226   |
| node_24: feature_name=cg17115147              | feature_id[1434].value <=<br>threshold=0.2961975038051605 |
| node_25: feature_name=cg24474622              | feature_id[2737].value <=<br>threshold=0.7211934924125671 |
| node_26: feature_name=cg09828346              | feature_id[2249].value ><br>threshold=0.73759526014328    |
| Class: gastrointestinal stromal tumour (GIST) |                                                           |
|                                               |                                                           |
| Rules_183                                     | passed counts:1                                           |
| node_0: feature_name=cg11915444               | feature_id[1171].value ><br>threshold=0.3402601182460785  |
| node_10: feature_name=cg12109728              | feature_id[2810].value ><br>threshold=0.7068270146846771  |
| node_20: feature_name=cg16412000              | feature_id[789].value <=<br>threshold=0.6741803884506226  |
| node_21: feature_name=cg08571020              | feature_id[921].value ><br>threshold=0.7741039395332336   |
| Class: dermatofibrosarcoma protuberans (DFSP) |                                                           |
|                                               |                                                           |
| Rules_184                                     | passed counts:1                                           |
| node_0: feature_name=cg11915444               | feature_id[1171].value ><br>threshold=0.3402601182460785  |
| node_10: feature_name=cg12109728              | feature_id[2810].value <=<br>threshold=0.7068270146846771 |
| node_11: feature_name=cg23902076              | feature_id[1902].value ><br>threshold=0.8691235482692719  |
| node_13: feature_name=cg17174566              | feature_id[2578].value <=<br>threshold=0.8555663526058197 |
| node_14: feature_name=cg22798362              | feature_id[520].value ><br>threshold=0.8689102232456207   |
| node_16: feature_name=cg04884579              | feature_id[1861].value ><br>threshold=0.8975329697132111  |
| Class: gastrointestinal stromal tumour (GIST) |                                                           |
|                                               |                                                           |
| Rules_185                                     | passed counts:1                                           |
| node_0: feature_name=cg11915444               | feature_id[1171].value ><br>threshold=0.3402601182460785  |



|                                               |                                                           |
|-----------------------------------------------|-----------------------------------------------------------|
| node_10: feature_name=cg12109728              | feature_id[2810].value <=<br>threshold=0.7068270146846771 |
| node_11: feature_name=cg23902076              | feature_id[1902].value ><br>threshold=0.8691235482692719  |
| node_13: feature_name=cg17174566              | feature_id[2578].value <=<br>threshold=0.8555663526058197 |
| node_14: feature_name=cg22798362              | feature_id[520].value ><br>threshold=0.8689102232456207   |
| node_16: feature_name=cg04884579              | feature_id[1861].value <=<br>threshold=0.8975329697132111 |
| Class: embryonal rhabdomyosarcoma (RMS (EMB)) |                                                           |
|                                               |                                                           |
| Rules_186                                     | passed counts:1                                           |
| node_0: feature_name=cg11915444               | feature_id[1171].value ><br>threshold=0.3402601182460785  |
| node_10: feature_name=cg12109728              | feature_id[2810].value <=<br>threshold=0.7068270146846771 |
| node_11: feature_name=cg23902076              | feature_id[1902].value ><br>threshold=0.8691235482692719  |
| node_13: feature_name=cg17174566              | feature_id[2578].value <=<br>threshold=0.8555663526058197 |
| node_14: feature_name=cg22798362              | feature_id[520].value <=<br>threshold=0.8689102232456207  |
| Class: angiosarcoma (AS)                      |                                                           |
|                                               |                                                           |
| Rules_187                                     | passed counts:1                                           |
| node_0: feature_name=cg11915444               | feature_id[1171].value <=<br>threshold=0.3402601182460785 |
| node_1: feature_name=cg00204976               | feature_id[3433].value ><br>threshold=0.7535275816917419  |
| node_3: feature_name=cg22663660               | feature_id[38].value ><br>threshold=0.5185286104679108    |
| node_5: feature_name=cg26184501               | feature_id[3451].value ><br>threshold=0.5434053987264633  |
| node_7: feature_name=cg14482093               | feature_id[1629].value ><br>threshold=0.5104826465249062  |
| Class: angiosarcoma (AS)                      |                                                           |
|                                               |                                                           |
| Rules_188                                     | passed counts:1                                           |
| node_0: feature_name=cg11915444               | feature_id[1171].value <=<br>threshold=0.3402601182460785 |

|                                     |                                                           |
|-------------------------------------|-----------------------------------------------------------|
| node_1: feature_name=cg00204976     | feature_id[3433].value ><br>threshold=0.7535275816917419  |
| node_3: feature_name=cg22663660     | feature_id[38].value ><br>threshold=0.5185286104679108    |
| node_5: feature_name=cg26184501     | feature_id[3451].value ><br>threshold=0.5434053987264633  |
| node_7: feature_name=cg14482093     | feature_id[1629].value <=<br>threshold=0.5104826465249062 |
| Class: infantile fibrosarcoma (IFS) |                                                           |
| Rules_189                           | passed counts:1                                           |
| node_0: feature_name=cg11915444     | feature_id[1171].value <=<br>threshold=0.3402601182460785 |
| node_1: feature_name=cg00204976     | feature_id[3433].value ><br>threshold=0.7535275816917419  |
| node_3: feature_name=cg22663660     | feature_id[38].value ><br>threshold=0.5185286104679108    |
| node_5: feature_name=cg26184501     | feature_id[3451].value <=<br>threshold=0.5434053987264633 |
| Class: chordoma (CHORD)             |                                                           |

(3) Rules on the MCFS feature list

|                                                       |                                                           |
|-------------------------------------------------------|-----------------------------------------------------------|
| Rules_0                                               | passed counts:77                                          |
| node_0: feature_name=cg11915444                       | feature_id[2002].value ><br>threshold=0.3402601182460785  |
| node_10: feature_name=cg26016985                      | feature_id[4407].value ><br>threshold=0.6493876278400421  |
| node_16: feature_name=cg23157618                      | feature_id[5511].value ><br>threshold=0.5759606957435608  |
| node_20: feature_name=cg10480329                      | feature_id[1439].value <=<br>threshold=0.5518321692943573 |
| node_21: feature_name=cg25510609                      | feature_id[149].value ><br>threshold=0.08151235431432724  |
| node_39: feature_name=cg08726900                      | feature_id[250].value <=<br>threshold=0.5245974063873291  |
| Class: high-grade conventional osteosarcoma (OS (HG)) |                                                           |
| Rules_1                                               | passed counts:72                                          |
| node_0: feature_name=cg11915444                       | feature_id[2002].value <=<br>threshold=0.3402601182460785 |
| node_1: feature_name=cg17156862                       | feature_id[2598].value ><br>threshold=0.6409126222133636  |

|                                  |                                                           |
|----------------------------------|-----------------------------------------------------------|
| Class: Ewing sarcoma (EWING)     |                                                           |
|                                  |                                                           |
| Rules_2                          | passed counts:65                                          |
| node_0: feature_name=cg11915444  | feature_id[2002].value ><br>threshold=0.3402601182460785  |
| node_10: feature_name=cg26016985 | feature_id[4407].value <=<br>threshold=0.6493876278400421 |
| node_11: feature_name=cg14769121 | feature_id[1178].value <=<br>threshold=0.8216802477836609 |
| Class: chordoma (CHORD)          |                                                           |
|                                  |                                                           |
| Rules_3                          | passed counts:64                                          |
| node_0: feature_name=cg11915444  | feature_id[2002].value ><br>threshold=0.3402601182460785  |
| node_10: feature_name=cg26016985 | feature_id[4407].value ><br>threshold=0.6493876278400421  |
| node_16: feature_name=cg23157618 | feature_id[5511].value ><br>threshold=0.5759606957435608  |
| node_20: feature_name=cg10480329 | feature_id[1439].value ><br>threshold=0.5518321692943573  |
| node_48: feature_name=cg17843418 | feature_id[4868].value ><br>threshold=0.34969255328178406 |
| node_52: feature_name=cg24407065 | feature_id[4522].value ><br>threshold=0.5364363789558411  |
| node_56: feature_name=cg07281938 | feature_id[249].value <=<br>threshold=0.7506992518901825  |
| node_57: feature_name=cg21189849 | feature_id[1261].value <=<br>threshold=0.7545044124126434 |
| node_58: feature_name=cg11960033 | feature_id[260].value ><br>threshold=0.7065970599651337   |
| Class: chondrosarcoma (CSA)      |                                                           |
|                                  |                                                           |
| Rules_4                          | passed counts:61                                          |
| node_0: feature_name=cg11915444  | feature_id[2002].value ><br>threshold=0.3402601182460785  |
| node_10: feature_name=cg26016985 | feature_id[4407].value ><br>threshold=0.6493876278400421  |
| node_16: feature_name=cg23157618 | feature_id[5511].value ><br>threshold=0.5759606957435608  |
| node_20: feature_name=cg10480329 | feature_id[1439].value ><br>threshold=0.5518321692943573  |
| node_48: feature_name=cg17843418 | feature_id[4868].value ><br>threshold=0.34969255328178406 |

|                                              |                                                            |
|----------------------------------------------|------------------------------------------------------------|
| node_52: feature_name=cg24407065             | feature_id[4522].value ><br>threshold=0.5364363789558411   |
| node_56: feature_name=cg07281938             | feature_id[249].value ><br>threshold=0.7506992518901825    |
| node_78: feature_name=cg21759907             | feature_id[1650].value <=<br>threshold=0.46823520958423615 |
| node_79: feature_name=cg25476129             | feature_id[2302].value ><br>threshold=0.1687404215335846   |
| node_93: feature_name=cg16318412             | feature_id[1590].value <=<br>threshold=0.9159156084060669  |
| Class: leiomyosarcoma (LMS)                  |                                                            |
| Rules_5                                      | passed counts:61                                           |
| node_0: feature_name=cg11915444              | feature_id[2002].value ><br>threshold=0.3402601182460785   |
| node_10: feature_name=cg26016985             | feature_id[4407].value ><br>threshold=0.6493876278400421   |
| node_16: feature_name=cg23157618             | feature_id[5511].value <=<br>threshold=0.5759606957435608  |
| node_17: feature_name=cg23477348             | feature_id[3774].value ><br>threshold=0.19775588810443878  |
| Class: alveolar rhabdomyosarcoma (RMS (ALV)) |                                                            |
| Rules_6                                      | passed counts:54                                           |
| node_0: feature_name=cg11915444              | feature_id[2002].value ><br>threshold=0.3402601182460785   |
| node_10: feature_name=cg26016985             | feature_id[4407].value ><br>threshold=0.6493876278400421   |
| node_16: feature_name=cg23157618             | feature_id[5511].value ><br>threshold=0.5759606957435608   |
| node_20: feature_name=cg10480329             | feature_id[1439].value ><br>threshold=0.5518321692943573   |
| node_48: feature_name=cg17843418             | feature_id[4868].value <=<br>threshold=0.34969255328178406 |
| node_49: feature_name=cg06551007             | feature_id[1675].value ><br>threshold=0.44745437800884247  |
| Class: synovial sarcoma (SYSA)               |                                                            |
| Rules_7                                      | passed counts:50                                           |
| node_0: feature_name=cg11915444              | feature_id[2002].value ><br>threshold=0.3402601182460785   |

|                                                     |                                                            |
|-----------------------------------------------------|------------------------------------------------------------|
| node_10: feature_name=cg26016985                    | feature_id[4407].value ><br>threshold=0.6493876278400421   |
| node_16: feature_name=cg23157618                    | feature_id[5511].value ><br>threshold=0.5759606957435608   |
| node_20: feature_name=cg10480329                    | feature_id[1439].value ><br>threshold=0.5518321692943573   |
| node_48: feature_name=cg17843418                    | feature_id[4868].value ><br>threshold=0.34969255328178406  |
| node_52: feature_name=cg24407065                    | feature_id[4522].value <=<br>threshold=0.5364363789558411  |
| node_53: feature_name=cg27049344                    | feature_id[5181].value <=<br>threshold=0.9606902599334717  |
| Class: gastrointestinal stromal tumour (GIST)       |                                                            |
|                                                     |                                                            |
| Rules_8                                             | passed counts:41                                           |
| node_0: feature_name=cg11915444                     | feature_id[2002].value ><br>threshold=0.3402601182460785   |
| node_10: feature_name=cg26016985                    | feature_id[4407].value ><br>threshold=0.6493876278400421   |
| node_16: feature_name=cg23157618                    | feature_id[5511].value ><br>threshold=0.5759606957435608   |
| node_20: feature_name=cg10480329                    | feature_id[1439].value ><br>threshold=0.5518321692943573   |
| node_48: feature_name=cg17843418                    | feature_id[4868].value ><br>threshold=0.34969255328178406  |
| node_52: feature_name=cg24407065                    | feature_id[4522].value ><br>threshold=0.5364363789558411   |
| node_56: feature_name=cg07281938                    | feature_id[249].value ><br>threshold=0.7506992518901825    |
| node_78: feature_name=cg21759907                    | feature_id[1650].value ><br>threshold=0.46823520958423615  |
| node_98: feature_name=cg10886334                    | feature_id[3975].value <=<br>threshold=0.43698127567768097 |
| node_99: feature_name=cg08091706                    | feature_id[4506].value ><br>threshold=0.7506741881370544   |
| Class: desmoplastic small round cell tumour (DSRCT) |                                                            |
|                                                     |                                                            |
| Rules_9                                             | passed counts:40                                           |
| node_0: feature_name=cg11915444                     | feature_id[2002].value ><br>threshold=0.3402601182460785   |
| node_10: feature_name=cg26016985                    | feature_id[4407].value ><br>threshold=0.6493876278400421   |

|                                               |                                                           |
|-----------------------------------------------|-----------------------------------------------------------|
| node_16: feature_name=cg23157618              | feature_id[5511].value ><br>threshold=0.5759606957435608  |
| node_20: feature_name=cg10480329              | feature_id[1439].value ><br>threshold=0.5518321692943573  |
| node_48: feature_name=cg17843418              | feature_id[4868].value ><br>threshold=0.34969255328178406 |
| node_52: feature_name=cg24407065              | feature_id[4522].value ><br>threshold=0.5364363789558411  |
| node_56: feature_name=cg07281938              | feature_id[249].value ><br>threshold=0.7506992518901825   |
| node_78: feature_name=cg21759907              | feature_id[1650].value ><br>threshold=0.46823520958423615 |
| node_98: feature_name=cg10886334              | feature_id[3975].value ><br>threshold=0.43698127567768097 |
| node_102: feature_name=cg09373983             | feature_id[5025].value ><br>threshold=0.5575815737247467  |
| node_106: feature_name=cg12948116             | feature_id[5360].value ><br>threshold=0.5658791363239288  |
| node_388: feature_name=cg02855309             | feature_id[4351].value ><br>threshold=0.2790501043200493  |
| Class: embryonal rhabdomyosarcoma (RMS (EMB)) |                                                           |
|                                               |                                                           |
| Rules_10                                      | passed counts:39                                          |
| node_0: feature_name=cg11915444               | feature_id[2002].value ><br>threshold=0.3402601182460785  |
| node_10: feature_name=cg26016985              | feature_id[4407].value ><br>threshold=0.6493876278400421  |
| node_16: feature_name=cg23157618              | feature_id[5511].value ><br>threshold=0.5759606957435608  |
| node_20: feature_name=cg10480329              | feature_id[1439].value ><br>threshold=0.5518321692943573  |
| node_48: feature_name=cg17843418              | feature_id[4868].value ><br>threshold=0.34969255328178406 |
| node_52: feature_name=cg24407065              | feature_id[4522].value ><br>threshold=0.5364363789558411  |
| node_56: feature_name=cg07281938              | feature_id[249].value ><br>threshold=0.7506992518901825   |
| node_78: feature_name=cg21759907              | feature_id[1650].value ><br>threshold=0.46823520958423615 |
| node_98: feature_name=cg10886334              | feature_id[3975].value ><br>threshold=0.43698127567768097 |

|                                               |                                                           |
|-----------------------------------------------|-----------------------------------------------------------|
| node_102: feature_name=cg09373983             | feature_id[5025].value ><br>threshold=0.5575815737247467  |
| node_106: feature_name=cg12948116             | feature_id[5360].value <=<br>threshold=0.5658791363239288 |
| node_107: feature_name=cg21906519             | feature_id[5251].value ><br>threshold=0.6089984774589539  |
| node_111: feature_name=cg17537493             | feature_id[4217].value <=<br>threshold=0.5825372636318207 |
| node_112: feature_name=cg07260789             | feature_id[1074].value <=<br>threshold=0.8945248425006866 |
| Class: angiosarcoma (AS)                      |                                                           |
| Rules_11                                      | passed counts:38                                          |
| node_0: feature_name=cg11915444               | feature_id[2002].value ><br>threshold=0.3402601182460785  |
| node_10: feature_name=cg26016985              | feature_id[4407].value ><br>threshold=0.6493876278400421  |
| node_16: feature_name=cg23157618              | feature_id[5511].value ><br>threshold=0.5759606957435608  |
| node_20: feature_name=cg10480329              | feature_id[1439].value ><br>threshold=0.5518321692943573  |
| node_48: feature_name=cg17843418              | feature_id[4868].value ><br>threshold=0.34969255328178406 |
| node_52: feature_name=cg24407065              | feature_id[4522].value ><br>threshold=0.5364363789558411  |
| node_56: feature_name=cg07281938              | feature_id[249].value ><br>threshold=0.7506992518901825   |
| node_78: feature_name=cg21759907              | feature_id[1650].value ><br>threshold=0.46823520958423615 |
| node_98: feature_name=cg10886334              | feature_id[3975].value ><br>threshold=0.43698127567768097 |
| node_102: feature_name=cg09373983             | feature_id[5025].value <=<br>threshold=0.5575815737247467 |
| node_103: feature_name=cg07642499             | feature_id[3026].value ><br>threshold=0.7077974379062653  |
| Class: dermatofibrosarcoma protuberans (DFSP) |                                                           |
| Rules_12                                      | passed counts:37                                          |
| node_0: feature_name=cg11915444               | feature_id[2002].value ><br>threshold=0.3402601182460785  |
| node_10: feature_name=cg26016985              | feature_id[4407].value ><br>threshold=0.6493876278400421  |

|                                   |                                                           |
|-----------------------------------|-----------------------------------------------------------|
| node_16: feature_name=cg23157618  | feature_id[5511].value ><br>threshold=0.5759606957435608  |
| node_20: feature_name=cg10480329  | feature_id[1439].value ><br>threshold=0.5518321692943573  |
| node_48: feature_name=cg17843418  | feature_id[4868].value ><br>threshold=0.34969255328178406 |
| node_52: feature_name=cg24407065  | feature_id[4522].value ><br>threshold=0.5364363789558411  |
| node_56: feature_name=cg07281938  | feature_id[249].value ><br>threshold=0.7506992518901825   |
| node_78: feature_name=cg21759907  | feature_id[1650].value ><br>threshold=0.46823520958423615 |
| node_98: feature_name=cg10886334  | feature_id[3975].value ><br>threshold=0.43698127567768097 |
| node_102: feature_name=cg09373983 | feature_id[5025].value ><br>threshold=0.5575815737247467  |
| node_106: feature_name=cg12948116 | feature_id[5360].value <=<br>threshold=0.5658791363239288 |
| node_107: feature_name=cg21906519 | feature_id[5251].value ><br>threshold=0.6089984774589539  |
| node_111: feature_name=cg17537493 | feature_id[4217].value ><br>threshold=0.5825372636318207  |
| node_117: feature_name=cg15720017 | feature_id[4443].value ><br>threshold=0.7009969055652618  |
| node_119: feature_name=cg06038180 | feature_id[3480].value ><br>threshold=0.4583848565816879  |
| node_121: feature_name=cg08619651 | feature_id[4882].value <=<br>threshold=0.2105495035648346 |
| node_122: feature_name=cg01014262 | feature_id[1911].value <=<br>threshold=0.5327437818050385 |
| node_123: feature_name=cg16863382 | feature_id[2922].value ><br>threshold=0.7200668156147003  |
| node_133: feature_name=cg06989443 | feature_id[2327].value <=<br>threshold=0.6579365730285645 |
| node_134: feature_name=cg07344990 | feature_id[2398].value ><br>threshold=0.5562876164913177  |
| node_138: feature_name=cg02966841 | feature_id[2199].value <=<br>threshold=0.7744501233100891 |
| node_139: feature_name=cg06989253 | feature_id[194].value ><br>threshold=0.7899391353130341   |
| node_171: feature_name=cg07041720 | feature_id[932].value <=<br>threshold=0.5004830807447433  |
| node_172: feature_name=cg04716580 | feature_id[1390].value ><br>threshold=0.8913259208202362  |



|                                         |                                                           |
|-----------------------------------------|-----------------------------------------------------------|
| node_182: feature_name=cg24426483       | feature_id[3487].value ><br>threshold=0.7537154853343964  |
| node_186: feature_name=cg11847597       | feature_id[2502].value ><br>threshold=0.49640630185604095 |
| Class: undifferentiated sarcoma (USARC) |                                                           |
| Rules_13                                | passed counts:37                                          |
| node_0: feature_name=cg11915444         | feature_id[2002].value ><br>threshold=0.3402601182460785  |
| node_10: feature_name=cg26016985        | feature_id[4407].value ><br>threshold=0.6493876278400421  |
| node_16: feature_name=cg23157618        | feature_id[5511].value ><br>threshold=0.5759606957435608  |
| node_20: feature_name=cg10480329        | feature_id[1439].value ><br>threshold=0.5518321692943573  |
| node_48: feature_name=cg17843418        | feature_id[4868].value ><br>threshold=0.34969255328178406 |
| node_52: feature_name=cg24407065        | feature_id[4522].value ><br>threshold=0.5364363789558411  |
| node_56: feature_name=cg07281938        | feature_id[249].value ><br>threshold=0.7506992518901825   |
| node_78: feature_name=cg21759907        | feature_id[1650].value ><br>threshold=0.46823520958423615 |
| node_98: feature_name=cg10886334        | feature_id[3975].value ><br>threshold=0.43698127567768097 |
| node_102: feature_name=cg09373983       | feature_id[5025].value ><br>threshold=0.5575815737247467  |
| node_106: feature_name=cg12948116       | feature_id[5360].value <=<br>threshold=0.5658791363239288 |
| node_107: feature_name=cg21906519       | feature_id[5251].value <=<br>threshold=0.6089984774589539 |
| node_108: feature_name=cg05288253       | feature_id[559].value ><br>threshold=0.28334617614746094  |
| Class: myxoid liposarcoma (MLS)         |                                                           |
| Rules_14                                | passed counts:30                                          |
| node_0: feature_name=cg11915444         | feature_id[2002].value ><br>threshold=0.3402601182460785  |
| node_10: feature_name=cg26016985        | feature_id[4407].value ><br>threshold=0.6493876278400421  |
| node_16: feature_name=cg23157618        | feature_id[5511].value ><br>threshold=0.5759606957435608  |

|                                                         |                                                           |
|---------------------------------------------------------|-----------------------------------------------------------|
| node_20: feature_name=cg10480329                        | feature_id[1439].value ><br>threshold=0.5518321692943573  |
| node_48: feature_name=cg17843418                        | feature_id[4868].value ><br>threshold=0.34969255328178406 |
| node_52: feature_name=cg24407065                        | feature_id[4522].value ><br>threshold=0.5364363789558411  |
| node_56: feature_name=cg07281938                        | feature_id[249].value ><br>threshold=0.7506992518901825   |
| node_78: feature_name=cg21759907                        | feature_id[1650].value ><br>threshold=0.46823520958423615 |
| node_98: feature_name=cg10886334                        | feature_id[3975].value ><br>threshold=0.43698127567768097 |
| node_102: feature_name=cg09373983                       | feature_id[5025].value ><br>threshold=0.5575815737247467  |
| node_106: feature_name=cg12948116                       | feature_id[5360].value <=<br>threshold=0.5658791363239288 |
| node_107: feature_name=cg21906519                       | feature_id[5251].value ><br>threshold=0.6089984774589539  |
| node_111: feature_name=cg17537493                       | feature_id[4217].value ><br>threshold=0.5825372636318207  |
| node_117: feature_name=cg15720017                       | feature_id[4443].value ><br>threshold=0.7009969055652618  |
| node_119: feature_name=cg06038180                       | feature_id[3480].value ><br>threshold=0.4583848565816879  |
| node_121: feature_name=cg08619651                       | feature_id[4882].value <=<br>threshold=0.2105495035648346 |
| node_122: feature_name=cg01014262                       | feature_id[1911].value <=<br>threshold=0.5327437818050385 |
| node_123: feature_name=cg16863382                       | feature_id[2922].value ><br>threshold=0.7200668156147003  |
| node_133: feature_name=cg06989443                       | feature_id[2327].value ><br>threshold=0.6579365730285645  |
| node_355: feature_name=cg27470978                       | feature_id[4804].value <=<br>threshold=0.6264137625694275 |
| node_356: feature_name=cg26964426                       | feature_id[2027].value ><br>threshold=0.665222555398941   |
| Class: malignant peripheral nerve sheath tumour (MPNST) |                                                           |
|                                                         |                                                           |
| Rules_15                                                | passed counts:29                                          |
| node_0: feature_name=cg11915444                         | feature_id[2002].value ><br>threshold=0.3402601182460785  |

|                                   |                                                           |
|-----------------------------------|-----------------------------------------------------------|
| node_10: feature_name=cg26016985  | feature_id[4407].value ><br>threshold=0.6493876278400421  |
| node_16: feature_name=cg23157618  | feature_id[5511].value ><br>threshold=0.5759606957435608  |
| node_20: feature_name=cg10480329  | feature_id[1439].value ><br>threshold=0.5518321692943573  |
| node_48: feature_name=cg17843418  | feature_id[4868].value ><br>threshold=0.34969255328178406 |
| node_52: feature_name=cg24407065  | feature_id[4522].value ><br>threshold=0.5364363789558411  |
| node_56: feature_name=cg07281938  | feature_id[249].value ><br>threshold=0.7506992518901825   |
| node_78: feature_name=cg21759907  | feature_id[1650].value ><br>threshold=0.46823520958423615 |
| node_98: feature_name=cg10886334  | feature_id[3975].value ><br>threshold=0.43698127567768097 |
| node_102: feature_name=cg09373983 | feature_id[5025].value ><br>threshold=0.5575815737247467  |
| node_106: feature_name=cg12948116 | feature_id[5360].value <=<br>threshold=0.5658791363239288 |
| node_107: feature_name=cg21906519 | feature_id[5251].value ><br>threshold=0.6089984774589539  |
| node_111: feature_name=cg17537493 | feature_id[4217].value ><br>threshold=0.5825372636318207  |
| node_117: feature_name=cg15720017 | feature_id[4443].value ><br>threshold=0.7009969055652618  |
| node_119: feature_name=cg06038180 | feature_id[3480].value <=<br>threshold=0.4583848565816879 |
| Class: schwannoma (SWN)           |                                                           |
|                                   |                                                           |
| Rules_16                          | passed counts:29                                          |
| node_0: feature_name=cg11915444   | feature_id[2002].value ><br>threshold=0.3402601182460785  |
| node_10: feature_name=cg26016985  | feature_id[4407].value ><br>threshold=0.6493876278400421  |
| node_16: feature_name=cg23157618  | feature_id[5511].value ><br>threshold=0.5759606957435608  |
| node_20: feature_name=cg10480329  | feature_id[1439].value ><br>threshold=0.5518321692943573  |
| node_48: feature_name=cg17843418  | feature_id[4868].value ><br>threshold=0.34969255328178406 |
| node_52: feature_name=cg24407065  | feature_id[4522].value ><br>threshold=0.5364363789558411  |

|                                      |                                                           |
|--------------------------------------|-----------------------------------------------------------|
| node_56: feature_name=cg07281938     | feature_id[249].value ><br>threshold=0.7506992518901825   |
| node_78: feature_name=cg21759907     | feature_id[1650].value ><br>threshold=0.46823520958423615 |
| node_98: feature_name=cg10886334     | feature_id[3975].value ><br>threshold=0.43698127567768097 |
| node_102: feature_name=cg09373983    | feature_id[5025].value ><br>threshold=0.5575815737247467  |
| node_106: feature_name=cg12948116    | feature_id[5360].value <=<br>threshold=0.5658791363239288 |
| node_107: feature_name=cg21906519    | feature_id[5251].value ><br>threshold=0.6089984774589539  |
| node_111: feature_name=cg17537493    | feature_id[4217].value ><br>threshold=0.5825372636318207  |
| node_117: feature_name=cg15720017    | feature_id[4443].value <=<br>threshold=0.7009969055652618 |
| Class: solitary fibrous tumour (SFT) |                                                           |
| Rules_17                             | passed counts:27                                          |
| node_0: feature_name=cg11915444      | feature_id[2002].value ><br>threshold=0.3402601182460785  |
| node_10: feature_name=cg26016985     | feature_id[4407].value ><br>threshold=0.6493876278400421  |
| node_16: feature_name=cg23157618     | feature_id[5511].value ><br>threshold=0.5759606957435608  |
| node_20: feature_name=cg10480329     | feature_id[1439].value ><br>threshold=0.5518321692943573  |
| node_48: feature_name=cg17843418     | feature_id[4868].value ><br>threshold=0.34969255328178406 |
| node_52: feature_name=cg24407065     | feature_id[4522].value ><br>threshold=0.5364363789558411  |
| node_56: feature_name=cg07281938     | feature_id[249].value ><br>threshold=0.7506992518901825   |
| node_78: feature_name=cg21759907     | feature_id[1650].value ><br>threshold=0.46823520958423615 |
| node_98: feature_name=cg10886334     | feature_id[3975].value ><br>threshold=0.43698127567768097 |
| node_102: feature_name=cg09373983    | feature_id[5025].value ><br>threshold=0.5575815737247467  |
| node_106: feature_name=cg12948116    | feature_id[5360].value <=<br>threshold=0.5658791363239288 |
| node_107: feature_name=cg21906519    | feature_id[5251].value ><br>threshold=0.6089984774589539  |

|                                   |                                                           |
|-----------------------------------|-----------------------------------------------------------|
| node_111: feature_name=cg17537493 | feature_id[4217].value ><br>threshold=0.5825372636318207  |
| node_117: feature_name=cg15720017 | feature_id[4443].value ><br>threshold=0.7009969055652618  |
| node_119: feature_name=cg06038180 | feature_id[3480].value ><br>threshold=0.4583848565816879  |
| node_121: feature_name=cg08619651 | feature_id[4882].value ><br>threshold=0.2105495035648346  |
| Class: epithelioid sarcoma (ES)   |                                                           |
| Rules_18                          | passed counts:23                                          |
| node_0: feature_name=cg11915444   | feature_id[2002].value ><br>threshold=0.3402601182460785  |
| node_10: feature_name=cg26016985  | feature_id[4407].value ><br>threshold=0.6493876278400421  |
| node_16: feature_name=cg23157618  | feature_id[5511].value ><br>threshold=0.5759606957435608  |
| node_20: feature_name=cg10480329  | feature_id[1439].value ><br>threshold=0.5518321692943573  |
| node_48: feature_name=cg17843418  | feature_id[4868].value ><br>threshold=0.34969255328178406 |
| node_52: feature_name=cg24407065  | feature_id[4522].value ><br>threshold=0.5364363789558411  |
| node_56: feature_name=cg07281938  | feature_id[249].value ><br>threshold=0.7506992518901825   |
| node_78: feature_name=cg21759907  | feature_id[1650].value ><br>threshold=0.46823520958423615 |
| node_98: feature_name=cg10886334  | feature_id[3975].value ><br>threshold=0.43698127567768097 |
| node_102: feature_name=cg09373983 | feature_id[5025].value ><br>threshold=0.5575815737247467  |
| node_106: feature_name=cg12948116 | feature_id[5360].value <=<br>threshold=0.5658791363239288 |
| node_107: feature_name=cg21906519 | feature_id[5251].value ><br>threshold=0.6089984774589539  |
| node_111: feature_name=cg17537493 | feature_id[4217].value ><br>threshold=0.5825372636318207  |
| node_117: feature_name=cg15720017 | feature_id[4443].value ><br>threshold=0.7009969055652618  |
| node_119: feature_name=cg06038180 | feature_id[3480].value ><br>threshold=0.4583848565816879  |
| node_121: feature_name=cg08619651 | feature_id[4882].value <=<br>threshold=0.2105495035648346 |

|                                          |                                                           |
|------------------------------------------|-----------------------------------------------------------|
| node_122: feature_name=cg01014262        | feature_id[1911].value <=<br>threshold=0.5327437818050385 |
| node_123: feature_name=cg16863382        | feature_id[2922].value <=<br>threshold=0.7200668156147003 |
| node_124: feature_name=cg11225330        | feature_id[3185].value <=<br>threshold=0.7814575433731079 |
| Class: alveolar soft part sarcoma (ASPS) |                                                           |
| Rules_19                                 | passed counts:22                                          |
| node_0: feature_name=cg11915444          | feature_id[2002].value ><br>threshold=0.3402601182460785  |
| node_10: feature_name=cg26016985         | feature_id[4407].value ><br>threshold=0.6493876278400421  |
| node_16: feature_name=cg23157618         | feature_id[5511].value ><br>threshold=0.5759606957435608  |
| node_20: feature_name=cg10480329         | feature_id[1439].value ><br>threshold=0.5518321692943573  |
| node_48: feature_name=cg17843418         | feature_id[4868].value ><br>threshold=0.34969255328178406 |
| node_52: feature_name=cg24407065         | feature_id[4522].value ><br>threshold=0.5364363789558411  |
| node_56: feature_name=cg07281938         | feature_id[249].value ><br>threshold=0.7506992518901825   |
| node_78: feature_name=cg21759907         | feature_id[1650].value ><br>threshold=0.46823520958423615 |
| node_98: feature_name=cg10886334         | feature_id[3975].value ><br>threshold=0.43698127567768097 |
| node_102: feature_name=cg09373983        | feature_id[5025].value ><br>threshold=0.5575815737247467  |
| node_106: feature_name=cg12948116        | feature_id[5360].value <=<br>threshold=0.5658791363239288 |
| node_107: feature_name=cg21906519        | feature_id[5251].value ><br>threshold=0.6089984774589539  |
| node_111: feature_name=cg17537493        | feature_id[4217].value ><br>threshold=0.5825372636318207  |
| node_117: feature_name=cg15720017        | feature_id[4443].value ><br>threshold=0.7009969055652618  |
| node_119: feature_name=cg06038180        | feature_id[3480].value ><br>threshold=0.4583848565816879  |
| node_121: feature_name=cg08619651        | feature_id[4882].value <=<br>threshold=0.2105495035648346 |
| node_122: feature_name=cg01014262        | feature_id[1911].value <=<br>threshold=0.5327437818050385 |

|                                                                                   |                                                           |
|-----------------------------------------------------------------------------------|-----------------------------------------------------------|
| node_123: feature_name=cg16863382                                                 | feature_id[2922].value ><br>threshold=0.7200668156147003  |
| node_133: feature_name=cg06989443                                                 | feature_id[2327].value <=<br>threshold=0.6579365730285645 |
| node_134: feature_name=cg07344990                                                 | feature_id[2398].value ><br>threshold=0.5562876164913177  |
| node_138: feature_name=cg02966841                                                 | feature_id[2199].value ><br>threshold=0.7744501233100891  |
| node_204: feature_name=cg12120430                                                 | feature_id[3727].value ><br>threshold=0.5775820016860962  |
| node_206: feature_name=cg18386876                                                 | feature_id[4066].value ><br>threshold=0.6847257018089294  |
| node_208: feature_name=cg02053092                                                 | feature_id[3610].value ><br>threshold=0.39507485926151276 |
| node_210: feature_name=cg10298992                                                 | feature_id[3603].value <=<br>threshold=0.5707973837852478 |
| node_211: feature_name=cg02436098                                                 | feature_id[1712].value ><br>threshold=0.27362556010484695 |
| node_225: feature_name=cg01794853                                                 | feature_id[1531].value ><br>threshold=0.46636733412742615 |
| Class: well differentiated liposarcoma (WDLS)/dedifferentiated liposarcoma (DDLs) |                                                           |
|                                                                                   |                                                           |
| Rules_20                                                                          | passed counts:21                                          |
| node_0: feature_name=cg11915444                                                   | feature_id[2002].value ><br>threshold=0.3402601182460785  |
| node_10: feature_name=cg26016985                                                  | feature_id[4407].value ><br>threshold=0.6493876278400421  |
| node_16: feature_name=cg23157618                                                  | feature_id[5511].value ><br>threshold=0.5759606957435608  |
| node_20: feature_name=cg10480329                                                  | feature_id[1439].value ><br>threshold=0.5518321692943573  |
| node_48: feature_name=cg17843418                                                  | feature_id[4868].value ><br>threshold=0.34969255328178406 |
| node_52: feature_name=cg24407065                                                  | feature_id[4522].value ><br>threshold=0.5364363789558411  |
| node_56: feature_name=cg07281938                                                  | feature_id[249].value ><br>threshold=0.7506992518901825   |
| node_78: feature_name=cg21759907                                                  | feature_id[1650].value ><br>threshold=0.46823520958423615 |
| node_98: feature_name=cg10886334                                                  | feature_id[3975].value ><br>threshold=0.43698127567768097 |

|                                        |                                                           |
|----------------------------------------|-----------------------------------------------------------|
| node_102: feature_name=cg09373983      | feature_id[5025].value ><br>threshold=0.5575815737247467  |
| node_106: feature_name=cg12948116      | feature_id[5360].value <=<br>threshold=0.5658791363239288 |
| node_107: feature_name=cg21906519      | feature_id[5251].value ><br>threshold=0.6089984774589539  |
| node_111: feature_name=cg17537493      | feature_id[4217].value ><br>threshold=0.5825372636318207  |
| node_117: feature_name=cg15720017      | feature_id[4443].value ><br>threshold=0.7009969055652618  |
| node_119: feature_name=cg06038180      | feature_id[3480].value ><br>threshold=0.4583848565816879  |
| node_121: feature_name=cg08619651      | feature_id[4882].value <=<br>threshold=0.2105495035648346 |
| node_122: feature_name=cg01014262      | feature_id[1911].value ><br>threshold=0.5327437818050385  |
| node_382: feature_name=cg26240231      | feature_id[4832].value ><br>threshold=0.9200497567653656  |
| Class: malignant rhabdoid tumour (MRT) |                                                           |
|                                        |                                                           |
| Rules_21                               | passed counts:16                                          |
| node_0: feature_name=cg11915444        | feature_id[2002].value ><br>threshold=0.3402601182460785  |
| node_10: feature_name=cg26016985       | feature_id[4407].value ><br>threshold=0.6493876278400421  |
| node_16: feature_name=cg23157618       | feature_id[5511].value ><br>threshold=0.5759606957435608  |
| node_20: feature_name=cg10480329       | feature_id[1439].value ><br>threshold=0.5518321692943573  |
| node_48: feature_name=cg17843418       | feature_id[4868].value ><br>threshold=0.34969255328178406 |
| node_52: feature_name=cg24407065       | feature_id[4522].value ><br>threshold=0.5364363789558411  |
| node_56: feature_name=cg07281938       | feature_id[249].value ><br>threshold=0.7506992518901825   |
| node_78: feature_name=cg21759907       | feature_id[1650].value ><br>threshold=0.46823520958423615 |
| node_98: feature_name=cg10886334       | feature_id[3975].value ><br>threshold=0.43698127567768097 |
| node_102: feature_name=cg09373983      | feature_id[5025].value ><br>threshold=0.5575815737247467  |
| node_106: feature_name=cg12948116      | feature_id[5360].value <=<br>threshold=0.5658791363239288 |



|                                                         |                                                           |
|---------------------------------------------------------|-----------------------------------------------------------|
| node_107: feature_name=cg21906519                       | feature_id[5251].value ><br>threshold=0.6089984774589539  |
| node_111: feature_name=cg17537493                       | feature_id[4217].value ><br>threshold=0.5825372636318207  |
| node_117: feature_name=cg15720017                       | feature_id[4443].value ><br>threshold=0.7009969055652618  |
| node_119: feature_name=cg06038180                       | feature_id[3480].value ><br>threshold=0.4583848565816879  |
| node_121: feature_name=cg08619651                       | feature_id[4882].value <=<br>threshold=0.2105495035648346 |
| node_122: feature_name=cg01014262                       | feature_id[1911].value <=<br>threshold=0.5327437818050385 |
| node_123: feature_name=cg16863382                       | feature_id[2922].value ><br>threshold=0.7200668156147003  |
| node_133: feature_name=cg06989443                       | feature_id[2327].value <=<br>threshold=0.6579365730285645 |
| node_134: feature_name=cg07344990                       | feature_id[2398].value <=<br>threshold=0.5562876164913177 |
| node_135: feature_name=cg01329151                       | feature_id[1681].value ><br>threshold=0.20543088763952255 |
| Class: low-grade endometrial stromal sarcoma (ESS (LG)) |                                                           |
|                                                         |                                                           |
| Rules_22                                                | passed counts:13                                          |
| node_0: feature_name=cg11915444                         | feature_id[2002].value ><br>threshold=0.3402601182460785  |
| node_10: feature_name=cg26016985                        | feature_id[4407].value ><br>threshold=0.6493876278400421  |
| node_16: feature_name=cg23157618                        | feature_id[5511].value ><br>threshold=0.5759606957435608  |
| node_20: feature_name=cg10480329                        | feature_id[1439].value ><br>threshold=0.5518321692943573  |
| node_48: feature_name=cg17843418                        | feature_id[4868].value ><br>threshold=0.34969255328178406 |
| node_52: feature_name=cg24407065                        | feature_id[4522].value ><br>threshold=0.5364363789558411  |
| node_56: feature_name=cg07281938                        | feature_id[249].value ><br>threshold=0.7506992518901825   |
| node_78: feature_name=cg21759907                        | feature_id[1650].value ><br>threshold=0.46823520958423615 |
| node_98: feature_name=cg10886334                        | feature_id[3975].value ><br>threshold=0.43698127567768097 |

|                                         |                                                           |
|-----------------------------------------|-----------------------------------------------------------|
| node_102: feature_name=cg09373983       | feature_id[5025].value ><br>threshold=0.5575815737247467  |
| node_106: feature_name=cg12948116       | feature_id[5360].value <=<br>threshold=0.5658791363239288 |
| node_107: feature_name=cg21906519       | feature_id[5251].value ><br>threshold=0.6089984774589539  |
| node_111: feature_name=cg17537493       | feature_id[4217].value ><br>threshold=0.5825372636318207  |
| node_117: feature_name=cg15720017       | feature_id[4443].value ><br>threshold=0.7009969055652618  |
| node_119: feature_name=cg06038180       | feature_id[3480].value ><br>threshold=0.4583848565816879  |
| node_121: feature_name=cg08619651       | feature_id[4882].value <=<br>threshold=0.2105495035648346 |
| node_122: feature_name=cg01014262       | feature_id[1911].value <=<br>threshold=0.5327437818050385 |
| node_123: feature_name=cg16863382       | feature_id[2922].value ><br>threshold=0.7200668156147003  |
| node_133: feature_name=cg06989443       | feature_id[2327].value <=<br>threshold=0.6579365730285645 |
| node_134: feature_name=cg07344990       | feature_id[2398].value ><br>threshold=0.5562876164913177  |
| node_138: feature_name=cg02966841       | feature_id[2199].value ><br>threshold=0.7744501233100891  |
| node_204: feature_name=cg12120430       | feature_id[3727].value ><br>threshold=0.5775820016860962  |
| node_206: feature_name=cg18386876       | feature_id[4066].value ><br>threshold=0.6847257018089294  |
| node_208: feature_name=cg02053092       | feature_id[3610].value ><br>threshold=0.39507485926151276 |
| node_210: feature_name=cg10298992       | feature_id[3603].value ><br>threshold=0.5707973837852478  |
| node_228: feature_name=cg03840920       | feature_id[4524].value <=<br>threshold=0.5365143716335297 |
| node_229: feature_name=cg21647035       | feature_id[2479].value <=<br>threshold=0.3486105799674988 |
| Class: desmoid-type fibromatosis (DTFM) |                                                           |
| Rules_23                                | passed counts:13                                          |
| node_0: feature_name=cg11915444         | feature_id[2002].value ><br>threshold=0.3402601182460785  |
| node_10: feature_name=cg26016985        | feature_id[4407].value ><br>threshold=0.6493876278400421  |

|                                                  |                                                           |
|--------------------------------------------------|-----------------------------------------------------------|
| node_16: feature_name=cg23157618                 | feature_id[5511].value ><br>threshold=0.5759606957435608  |
| node_20: feature_name=cg10480329                 | feature_id[1439].value ><br>threshold=0.5518321692943573  |
| node_48: feature_name=cg17843418                 | feature_id[4868].value ><br>threshold=0.34969255328178406 |
| node_52: feature_name=cg24407065                 | feature_id[4522].value ><br>threshold=0.5364363789558411  |
| node_56: feature_name=cg07281938                 | feature_id[249].value ><br>threshold=0.7506992518901825   |
| node_78: feature_name=cg21759907                 | feature_id[1650].value ><br>threshold=0.46823520958423615 |
| node_98: feature_name=cg10886334                 | feature_id[3975].value ><br>threshold=0.43698127567768097 |
| node_102: feature_name=cg09373983                | feature_id[5025].value ><br>threshold=0.5575815737247467  |
| node_106: feature_name=cg12948116                | feature_id[5360].value <=<br>threshold=0.5658791363239288 |
| node_107: feature_name=cg21906519                | feature_id[5251].value ><br>threshold=0.6089984774589539  |
| node_111: feature_name=cg17537493                | feature_id[4217].value ><br>threshold=0.5825372636318207  |
| node_117: feature_name=cg15720017                | feature_id[4443].value ><br>threshold=0.7009969055652618  |
| node_119: feature_name=cg06038180                | feature_id[3480].value ><br>threshold=0.4583848565816879  |
| node_121: feature_name=cg08619651                | feature_id[4882].value <=<br>threshold=0.2105495035648346 |
| node_122: feature_name=cg01014262                | feature_id[1911].value <=<br>threshold=0.5327437818050385 |
| node_123: feature_name=cg16863382                | feature_id[2922].value ><br>threshold=0.7200668156147003  |
| node_133: feature_name=cg06989443                | feature_id[2327].value <=<br>threshold=0.6579365730285645 |
| node_134: feature_name=cg07344990                | feature_id[2398].value ><br>threshold=0.5562876164913177  |
| node_138: feature_name=cg02966841                | feature_id[2199].value ><br>threshold=0.7744501233100891  |
| node_204: feature_name=cg12120430                | feature_id[3727].value <=<br>threshold=0.5775820016860962 |
| Class: angioleiomyoma (ALMO)/myopericytoma (MPC) |                                                           |
|                                                  |                                                           |

|                                   |                                                           |
|-----------------------------------|-----------------------------------------------------------|
| Rules_24                          | passed counts:12                                          |
| node_0: feature_name=cg11915444   | feature_id[2002].value ><br>threshold=0.3402601182460785  |
| node_10: feature_name=cg26016985  | feature_id[4407].value ><br>threshold=0.6493876278400421  |
| node_16: feature_name=cg23157618  | feature_id[5511].value ><br>threshold=0.5759606957435608  |
| node_20: feature_name=cg10480329  | feature_id[1439].value ><br>threshold=0.5518321692943573  |
| node_48: feature_name=cg17843418  | feature_id[4868].value ><br>threshold=0.34969255328178406 |
| node_52: feature_name=cg24407065  | feature_id[4522].value ><br>threshold=0.5364363789558411  |
| node_56: feature_name=cg07281938  | feature_id[249].value ><br>threshold=0.7506992518901825   |
| node_78: feature_name=cg21759907  | feature_id[1650].value ><br>threshold=0.46823520958423615 |
| node_98: feature_name=cg10886334  | feature_id[3975].value ><br>threshold=0.43698127567768097 |
| node_102: feature_name=cg09373983 | feature_id[5025].value ><br>threshold=0.5575815737247467  |
| node_106: feature_name=cg12948116 | feature_id[5360].value <=<br>threshold=0.5658791363239288 |
| node_107: feature_name=cg21906519 | feature_id[5251].value ><br>threshold=0.6089984774589539  |
| node_111: feature_name=cg17537493 | feature_id[4217].value ><br>threshold=0.5825372636318207  |
| node_117: feature_name=cg15720017 | feature_id[4443].value ><br>threshold=0.7009969055652618  |
| node_119: feature_name=cg06038180 | feature_id[3480].value ><br>threshold=0.4583848565816879  |
| node_121: feature_name=cg08619651 | feature_id[4882].value <=<br>threshold=0.2105495035648346 |
| node_122: feature_name=cg01014262 | feature_id[1911].value <=<br>threshold=0.5327437818050385 |
| node_123: feature_name=cg16863382 | feature_id[2922].value ><br>threshold=0.7200668156147003  |
| node_133: feature_name=cg06989443 | feature_id[2327].value ><br>threshold=0.6579365730285645  |
| node_355: feature_name=cg27470978 | feature_id[4804].value ><br>threshold=0.6264137625694275  |
| node_361: feature_name=cg20252837 | feature_id[420].value <=<br>threshold=0.53105828166008    |

|                                             |                                                           |
|---------------------------------------------|-----------------------------------------------------------|
| Class: small blue round cell tumour (SBRCT) |                                                           |
| Rules_25                                    | passed counts:12                                          |
| node_0: feature_name=cg11915444             | feature_id[2002].value ><br>threshold=0.3402601182460785  |
| node_10: feature_name=cg26016985            | feature_id[4407].value ><br>threshold=0.6493876278400421  |
| node_16: feature_name=cg23157618            | feature_id[5511].value ><br>threshold=0.5759606957435608  |
| node_20: feature_name=cg10480329            | feature_id[1439].value ><br>threshold=0.5518321692943573  |
| node_48: feature_name=cg17843418            | feature_id[4868].value ><br>threshold=0.34969255328178406 |
| node_52: feature_name=cg24407065            | feature_id[4522].value ><br>threshold=0.5364363789558411  |
| node_56: feature_name=cg07281938            | feature_id[249].value ><br>threshold=0.7506992518901825   |
| node_78: feature_name=cg21759907            | feature_id[1650].value ><br>threshold=0.46823520958423615 |
| node_98: feature_name=cg10886334            | feature_id[3975].value ><br>threshold=0.43698127567768097 |
| node_102: feature_name=cg09373983           | feature_id[5025].value ><br>threshold=0.5575815737247467  |
| node_106: feature_name=cg12948116           | feature_id[5360].value <=<br>threshold=0.5658791363239288 |
| node_107: feature_name=cg21906519           | feature_id[5251].value ><br>threshold=0.6089984774589539  |
| node_111: feature_name=cg17537493           | feature_id[4217].value ><br>threshold=0.5825372636318207  |
| node_117: feature_name=cg15720017           | feature_id[4443].value ><br>threshold=0.7009969055652618  |
| node_119: feature_name=cg06038180           | feature_id[3480].value ><br>threshold=0.4583848565816879  |
| node_121: feature_name=cg08619651           | feature_id[4882].value <=<br>threshold=0.2105495035648346 |
| node_122: feature_name=cg01014262           | feature_id[1911].value <=<br>threshold=0.5327437818050385 |
| node_123: feature_name=cg16863382           | feature_id[2922].value ><br>threshold=0.7200668156147003  |
| node_133: feature_name=cg06989443           | feature_id[2327].value <=<br>threshold=0.6579365730285645 |
| node_134: feature_name=cg07344990           | feature_id[2398].value ><br>threshold=0.5562876164913177  |

|                                     |                                                           |
|-------------------------------------|-----------------------------------------------------------|
| node_138: feature_name=cg02966841   | feature_id[2199].value ><br>threshold=0.7744501233100891  |
| node_204: feature_name=cg12120430   | feature_id[3727].value ><br>threshold=0.5775820016860962  |
| node_206: feature_name=cg18386876   | feature_id[4066].value ><br>threshold=0.6847257018089294  |
| node_208: feature_name=cg02053092   | feature_id[3610].value ><br>threshold=0.39507485926151276 |
| node_210: feature_name=cg10298992   | feature_id[3603].value ><br>threshold=0.5707973837852478  |
| node_228: feature_name=cg03840920   | feature_id[4524].value ><br>threshold=0.5365143716335297  |
| node_234: feature_name=cg25364972   | feature_id[1792].value ><br>threshold=0.2418053299188614  |
| node_238: feature_name=cg23485307   | feature_id[221].value <=<br>threshold=0.14884746074676514 |
| node_239: feature_name=cg13972711   | feature_id[4461].value <=<br>threshold=0.8822346031665802 |
| Class: infantile fibrosarcoma (IFS) |                                                           |
|                                     |                                                           |
| Rules_26                            | passed counts:12                                          |
| node_0: feature_name=cg11915444     | feature_id[2002].value ><br>threshold=0.3402601182460785  |
| node_10: feature_name=cg26016985    | feature_id[4407].value ><br>threshold=0.6493876278400421  |
| node_16: feature_name=cg23157618    | feature_id[5511].value ><br>threshold=0.5759606957435608  |
| node_20: feature_name=cg10480329    | feature_id[1439].value ><br>threshold=0.5518321692943573  |
| node_48: feature_name=cg17843418    | feature_id[4868].value ><br>threshold=0.34969255328178406 |
| node_52: feature_name=cg24407065    | feature_id[4522].value ><br>threshold=0.5364363789558411  |
| node_56: feature_name=cg07281938    | feature_id[249].value ><br>threshold=0.7506992518901825   |
| node_78: feature_name=cg21759907    | feature_id[1650].value ><br>threshold=0.46823520958423615 |
| node_98: feature_name=cg10886334    | feature_id[3975].value ><br>threshold=0.43698127567768097 |
| node_102: feature_name=cg09373983   | feature_id[5025].value ><br>threshold=0.5575815737247467  |
| node_106: feature_name=cg12948116   | feature_id[5360].value <=<br>threshold=0.5658791363239288 |

|                                            |                                                           |
|--------------------------------------------|-----------------------------------------------------------|
| node_107: feature_name=cg21906519          | feature_id[5251].value ><br>threshold=0.6089984774589539  |
| node_111: feature_name=cg17537493          | feature_id[4217].value ><br>threshold=0.5825372636318207  |
| node_117: feature_name=cg15720017          | feature_id[4443].value ><br>threshold=0.7009969055652618  |
| node_119: feature_name=cg06038180          | feature_id[3480].value ><br>threshold=0.4583848565816879  |
| node_121: feature_name=cg08619651          | feature_id[4882].value <=<br>threshold=0.2105495035648346 |
| node_122: feature_name=cg01014262          | feature_id[1911].value <=<br>threshold=0.5327437818050385 |
| node_123: feature_name=cg16863382          | feature_id[2922].value ><br>threshold=0.7200668156147003  |
| node_133: feature_name=cg06989443          | feature_id[2327].value <=<br>threshold=0.6579365730285645 |
| node_134: feature_name=cg07344990          | feature_id[2398].value ><br>threshold=0.5562876164913177  |
| node_138: feature_name=cg02966841          | feature_id[2199].value ><br>threshold=0.7744501233100891  |
| node_204: feature_name=cg12120430          | feature_id[3727].value ><br>threshold=0.5775820016860962  |
| node_206: feature_name=cg18386876          | feature_id[4066].value ><br>threshold=0.6847257018089294  |
| node_208: feature_name=cg02053092          | feature_id[3610].value ><br>threshold=0.39507485926151276 |
| node_210: feature_name=cg10298992          | feature_id[3603].value ><br>threshold=0.5707973837852478  |
| node_228: feature_name=cg03840920          | feature_id[4524].value ><br>threshold=0.5365143716335297  |
| node_234: feature_name=cg25364972          | feature_id[1792].value <=<br>threshold=0.2418053299188614 |
| node_235: feature_name=cg07612468          | feature_id[803].value <=<br>threshold=0.8302715420722961  |
| Class: ossifying fibromyxoid tumour (OFMT) |                                                           |
|                                            |                                                           |
| Rules_27                                   | passed counts:12                                          |
| node_0: feature_name=cg11915444            | feature_id[2002].value ><br>threshold=0.3402601182460785  |
| node_10: feature_name=cg26016985           | feature_id[4407].value ><br>threshold=0.6493876278400421  |
| node_16: feature_name=cg23157618           | feature_id[5511].value ><br>threshold=0.5759606957435608  |

|                                   |                                                            |
|-----------------------------------|------------------------------------------------------------|
| node_20: feature_name=cg10480329  | feature_id[1439].value ><br>threshold=0.5518321692943573   |
| node_48: feature_name=cg17843418  | feature_id[4868].value ><br>threshold=0.34969255328178406  |
| node_52: feature_name=cg24407065  | feature_id[4522].value ><br>threshold=0.5364363789558411   |
| node_56: feature_name=cg07281938  | feature_id[249].value ><br>threshold=0.7506992518901825    |
| node_78: feature_name=cg21759907  | feature_id[1650].value ><br>threshold=0.46823520958423615  |
| node_98: feature_name=cg10886334  | feature_id[3975].value ><br>threshold=0.43698127567768097  |
| node_102: feature_name=cg09373983 | feature_id[5025].value ><br>threshold=0.5575815737247467   |
| node_106: feature_name=cg12948116 | feature_id[5360].value <=<br>threshold=0.5658791363239288  |
| node_107: feature_name=cg21906519 | feature_id[5251].value ><br>threshold=0.6089984774589539   |
| node_111: feature_name=cg17537493 | feature_id[4217].value ><br>threshold=0.5825372636318207   |
| node_117: feature_name=cg15720017 | feature_id[4443].value ><br>threshold=0.7009969055652618   |
| node_119: feature_name=cg06038180 | feature_id[3480].value ><br>threshold=0.4583848565816879   |
| node_121: feature_name=cg08619651 | feature_id[4882].value <=<br>threshold=0.2105495035648346  |
| node_122: feature_name=cg01014262 | feature_id[1911].value <=<br>threshold=0.5327437818050385  |
| node_123: feature_name=cg16863382 | feature_id[2922].value ><br>threshold=0.7200668156147003   |
| node_133: feature_name=cg06989443 | feature_id[2327].value <=<br>threshold=0.6579365730285645  |
| node_134: feature_name=cg07344990 | feature_id[2398].value ><br>threshold=0.5562876164913177   |
| node_138: feature_name=cg02966841 | feature_id[2199].value ><br>threshold=0.7744501233100891   |
| node_204: feature_name=cg12120430 | feature_id[3727].value ><br>threshold=0.5775820016860962   |
| node_206: feature_name=cg18386876 | feature_id[4066].value ><br>threshold=0.6847257018089294   |
| node_208: feature_name=cg02053092 | feature_id[3610].value <=<br>threshold=0.39507485926151276 |
| Class: fibrous dysplasia (FDY)    |                                                            |



|                                   |                                                           |
|-----------------------------------|-----------------------------------------------------------|
| Rules_28                          | passed counts:12                                          |
| node_0: feature_name=cg11915444   | feature_id[2002].value ><br>threshold=0.3402601182460785  |
| node_10: feature_name=cg26016985  | feature_id[4407].value ><br>threshold=0.6493876278400421  |
| node_16: feature_name=cg23157618  | feature_id[5511].value ><br>threshold=0.5759606957435608  |
| node_20: feature_name=cg10480329  | feature_id[1439].value ><br>threshold=0.5518321692943573  |
| node_48: feature_name=cg17843418  | feature_id[4868].value ><br>threshold=0.34969255328178406 |
| node_52: feature_name=cg24407065  | feature_id[4522].value ><br>threshold=0.5364363789558411  |
| node_56: feature_name=cg07281938  | feature_id[249].value ><br>threshold=0.7506992518901825   |
| node_78: feature_name=cg21759907  | feature_id[1650].value ><br>threshold=0.46823520958423615 |
| node_98: feature_name=cg10886334  | feature_id[3975].value ><br>threshold=0.43698127567768097 |
| node_102: feature_name=cg09373983 | feature_id[5025].value ><br>threshold=0.5575815737247467  |
| node_106: feature_name=cg12948116 | feature_id[5360].value <=<br>threshold=0.5658791363239288 |
| node_107: feature_name=cg21906519 | feature_id[5251].value ><br>threshold=0.6089984774589539  |
| node_111: feature_name=cg17537493 | feature_id[4217].value ><br>threshold=0.5825372636318207  |
| node_117: feature_name=cg15720017 | feature_id[4443].value ><br>threshold=0.7009969055652618  |
| node_119: feature_name=cg06038180 | feature_id[3480].value ><br>threshold=0.4583848565816879  |
| node_121: feature_name=cg08619651 | feature_id[4882].value <=<br>threshold=0.2105495035648346 |
| node_122: feature_name=cg01014262 | feature_id[1911].value <=<br>threshold=0.5327437818050385 |
| node_123: feature_name=cg16863382 | feature_id[2922].value ><br>threshold=0.7200668156147003  |
| node_133: feature_name=cg06989443 | feature_id[2327].value <=<br>threshold=0.6579365730285645 |
| node_134: feature_name=cg07344990 | feature_id[2398].value ><br>threshold=0.5562876164913177  |

|                                                |                                                           |
|------------------------------------------------|-----------------------------------------------------------|
| node_138: feature_name=cg02966841              | feature_id[2199].value ><br>threshold=0.7744501233100891  |
| node_204: feature_name=cg12120430              | feature_id[3727].value ><br>threshold=0.5775820016860962  |
| node_206: feature_name=cg18386876              | feature_id[4066].value <=<br>threshold=0.6847257018089294 |
| Class: clear cell sarcoma of the kidney (CCSK) |                                                           |
| Rules_29                                       | passed counts:11                                          |
| node_0: feature_name=cg11915444                | feature_id[2002].value ><br>threshold=0.3402601182460785  |
| node_10: feature_name=cg26016985               | feature_id[4407].value ><br>threshold=0.6493876278400421  |
| node_16: feature_name=cg23157618               | feature_id[5511].value ><br>threshold=0.5759606957435608  |
| node_20: feature_name=cg10480329               | feature_id[1439].value ><br>threshold=0.5518321692943573  |
| node_48: feature_name=cg17843418               | feature_id[4868].value ><br>threshold=0.34969255328178406 |
| node_52: feature_name=cg24407065               | feature_id[4522].value ><br>threshold=0.5364363789558411  |
| node_56: feature_name=cg07281938               | feature_id[249].value ><br>threshold=0.7506992518901825   |
| node_78: feature_name=cg21759907               | feature_id[1650].value ><br>threshold=0.46823520958423615 |
| node_98: feature_name=cg10886334               | feature_id[3975].value ><br>threshold=0.43698127567768097 |
| node_102: feature_name=cg09373983              | feature_id[5025].value ><br>threshold=0.5575815737247467  |
| node_106: feature_name=cg12948116              | feature_id[5360].value <=<br>threshold=0.5658791363239288 |
| node_107: feature_name=cg21906519              | feature_id[5251].value ><br>threshold=0.6089984774589539  |
| node_111: feature_name=cg17537493              | feature_id[4217].value ><br>threshold=0.5825372636318207  |
| node_117: feature_name=cg15720017              | feature_id[4443].value ><br>threshold=0.7009969055652618  |
| node_119: feature_name=cg06038180              | feature_id[3480].value ><br>threshold=0.4583848565816879  |
| node_121: feature_name=cg08619651              | feature_id[4882].value <=<br>threshold=0.2105495035648346 |
| node_122: feature_name=cg01014262              | feature_id[1911].value <=<br>threshold=0.5327437818050385 |

|                                                  |                                                           |
|--------------------------------------------------|-----------------------------------------------------------|
| node_123: feature_name=cg16863382                | feature_id[2922].value ><br>threshold=0.7200668156147003  |
| node_133: feature_name=cg06989443                | feature_id[2327].value <=<br>threshold=0.6579365730285645 |
| node_134: feature_name=cg07344990                | feature_id[2398].value ><br>threshold=0.5562876164913177  |
| node_138: feature_name=cg02966841                | feature_id[2199].value ><br>threshold=0.7744501233100891  |
| node_204: feature_name=cg12120430                | feature_id[3727].value ><br>threshold=0.5775820016860962  |
| node_206: feature_name=cg18386876                | feature_id[4066].value ><br>threshold=0.6847257018089294  |
| node_208: feature_name=cg02053092                | feature_id[3610].value ><br>threshold=0.39507485926151276 |
| node_210: feature_name=cg10298992                | feature_id[3603].value ><br>threshold=0.5707973837852478  |
| node_228: feature_name=cg03840920                | feature_id[4524].value ><br>threshold=0.5365143716335297  |
| node_234: feature_name=cg25364972                | feature_id[1792].value ><br>threshold=0.2418053299188614  |
| node_238: feature_name=cg23485307                | feature_id[221].value ><br>threshold=0.14884746074676514  |
| node_242: feature_name=cg04873169                | feature_id[4696].value ><br>threshold=0.6058756709098816  |
| node_244: feature_name=cg17009731                | feature_id[3218].value ><br>threshold=0.6602252125740051  |
| node_246: feature_name=cg18253910                | feature_id[4458].value ><br>threshold=0.6904322504997253  |
| node_250: feature_name=cg04774476                | feature_id[1257].value ><br>threshold=0.5675267577171326  |
| node_256: feature_name=cg19259111                | feature_id[63].value ><br>threshold=0.40771469473838806   |
| node_264: feature_name=cg21483216                | feature_id[5253].value ><br>threshold=0.6332719326019287  |
| node_266: feature_name=cg04026354                | feature_id[3502].value ><br>threshold=0.42332448065280914 |
| node_336: feature_name=cg05824594                | feature_id[1431].value <=<br>threshold=0.629401296377182  |
| node_337: feature_name=cg18475969                | feature_id[2117].value ><br>threshold=0.3116971254348755  |
| node_351: feature_name=cg22286382                | feature_id[2821].value <=<br>threshold=0.6607459187507629 |
| Class: inflammatory myofibroblastic tumour (IMT) |                                                           |

|                                   |                                                           |
|-----------------------------------|-----------------------------------------------------------|
| Rules_30                          | passed counts:11                                          |
| node_0: feature_name=cg11915444   | feature_id[2002].value ><br>threshold=0.3402601182460785  |
| node_10: feature_name=cg26016985  | feature_id[4407].value ><br>threshold=0.6493876278400421  |
| node_16: feature_name=cg23157618  | feature_id[5511].value ><br>threshold=0.5759606957435608  |
| node_20: feature_name=cg10480329  | feature_id[1439].value ><br>threshold=0.5518321692943573  |
| node_48: feature_name=cg17843418  | feature_id[4868].value ><br>threshold=0.34969255328178406 |
| node_52: feature_name=cg24407065  | feature_id[4522].value ><br>threshold=0.5364363789558411  |
| node_56: feature_name=cg07281938  | feature_id[249].value ><br>threshold=0.7506992518901825   |
| node_78: feature_name=cg21759907  | feature_id[1650].value ><br>threshold=0.46823520958423615 |
| node_98: feature_name=cg10886334  | feature_id[3975].value ><br>threshold=0.43698127567768097 |
| node_102: feature_name=cg09373983 | feature_id[5025].value ><br>threshold=0.5575815737247467  |
| node_106: feature_name=cg12948116 | feature_id[5360].value <=<br>threshold=0.5658791363239288 |
| node_107: feature_name=cg21906519 | feature_id[5251].value ><br>threshold=0.6089984774589539  |
| node_111: feature_name=cg17537493 | feature_id[4217].value ><br>threshold=0.5825372636318207  |
| node_117: feature_name=cg15720017 | feature_id[4443].value ><br>threshold=0.7009969055652618  |
| node_119: feature_name=cg06038180 | feature_id[3480].value ><br>threshold=0.4583848565816879  |
| node_121: feature_name=cg08619651 | feature_id[4882].value <=<br>threshold=0.2105495035648346 |
| node_122: feature_name=cg01014262 | feature_id[1911].value <=<br>threshold=0.5327437818050385 |
| node_123: feature_name=cg16863382 | feature_id[2922].value ><br>threshold=0.7200668156147003  |
| node_133: feature_name=cg06989443 | feature_id[2327].value <=<br>threshold=0.6579365730285645 |
| node_134: feature_name=cg07344990 | feature_id[2398].value ><br>threshold=0.5562876164913177  |

|                                             |                                                           |
|---------------------------------------------|-----------------------------------------------------------|
| node_138: feature_name=cg02966841           | feature_id[2199].value ><br>threshold=0.7744501233100891  |
| node_204: feature_name=cg12120430           | feature_id[3727].value ><br>threshold=0.5775820016860962  |
| node_206: feature_name=cg18386876           | feature_id[4066].value ><br>threshold=0.6847257018089294  |
| node_208: feature_name=cg02053092           | feature_id[3610].value ><br>threshold=0.39507485926151276 |
| node_210: feature_name=cg10298992           | feature_id[3603].value ><br>threshold=0.5707973837852478  |
| node_228: feature_name=cg03840920           | feature_id[4524].value ><br>threshold=0.5365143716335297  |
| node_234: feature_name=cg25364972           | feature_id[1792].value ><br>threshold=0.2418053299188614  |
| node_238: feature_name=cg23485307           | feature_id[221].value ><br>threshold=0.14884746074676514  |
| node_242: feature_name=cg04873169           | feature_id[4696].value ><br>threshold=0.6058756709098816  |
| node_244: feature_name=cg17009731           | feature_id[3218].value ><br>threshold=0.6602252125740051  |
| node_246: feature_name=cg18253910           | feature_id[4458].value ><br>threshold=0.6904322504997253  |
| node_250: feature_name=cg04774476           | feature_id[1257].value ><br>threshold=0.5675267577171326  |
| node_256: feature_name=cg19259111           | feature_id[63].value <=<br>threshold=0.40771469473838806  |
| node_257: feature_name=cg10803714           | feature_id[856].value <=<br>threshold=0.4142659604549408  |
| Class: small blue round cell tumour (SBRCT) |                                                           |
|                                             |                                                           |
| Rules_31                                    | passed counts:11                                          |
| node_0: feature_name=cg11915444             | feature_id[2002].value ><br>threshold=0.3402601182460785  |
| node_10: feature_name=cg26016985            | feature_id[4407].value ><br>threshold=0.6493876278400421  |
| node_16: feature_name=cg23157618            | feature_id[5511].value ><br>threshold=0.5759606957435608  |
| node_20: feature_name=cg10480329            | feature_id[1439].value ><br>threshold=0.5518321692943573  |
| node_48: feature_name=cg17843418            | feature_id[4868].value ><br>threshold=0.34969255328178406 |
| node_52: feature_name=cg24407065            | feature_id[4522].value ><br>threshold=0.5364363789558411  |

|                                                                         |                                                           |
|-------------------------------------------------------------------------|-----------------------------------------------------------|
| node_56: feature_name=cg07281938                                        | feature_id[249].value ><br>threshold=0.7506992518901825   |
| node_78: feature_name=cg21759907                                        | feature_id[1650].value ><br>threshold=0.46823520958423615 |
| node_98: feature_name=cg10886334                                        | feature_id[3975].value ><br>threshold=0.43698127567768097 |
| node_102: feature_name=cg09373983                                       | feature_id[5025].value ><br>threshold=0.5575815737247467  |
| node_106: feature_name=cg12948116                                       | feature_id[5360].value <=<br>threshold=0.5658791363239288 |
| node_107: feature_name=cg21906519                                       | feature_id[5251].value ><br>threshold=0.6089984774589539  |
| node_111: feature_name=cg17537493                                       | feature_id[4217].value ><br>threshold=0.5825372636318207  |
| node_117: feature_name=cg15720017                                       | feature_id[4443].value ><br>threshold=0.7009969055652618  |
| node_119: feature_name=cg06038180                                       | feature_id[3480].value ><br>threshold=0.4583848565816879  |
| node_121: feature_name=cg08619651                                       | feature_id[4882].value <=<br>threshold=0.2105495035648346 |
| node_122: feature_name=cg01014262                                       | feature_id[1911].value <=<br>threshold=0.5327437818050385 |
| node_123: feature_name=cg16863382                                       | feature_id[2922].value ><br>threshold=0.7200668156147003  |
| node_133: feature_name=cg06989443                                       | feature_id[2327].value <=<br>threshold=0.6579365730285645 |
| node_134: feature_name=cg07344990                                       | feature_id[2398].value ><br>threshold=0.5562876164913177  |
| node_138: feature_name=cg02966841                                       | feature_id[2199].value <=<br>threshold=0.7744501233100891 |
| node_139: feature_name=cg06989253                                       | feature_id[194].value <=<br>threshold=0.7899391353130341  |
| node_140: feature_name=cg24617568                                       | feature_id[3282].value ><br>threshold=0.26932457089424133 |
| Class: atypical fibroxanthoma<br>(AFX)/pleomorphic dermal sarcoma (PDS) |                                                           |
| Rules_32                                                                | passed counts:10                                          |
| node_0: feature_name=cg11915444                                         | feature_id[2002].value ><br>threshold=0.3402601182460785  |
| node_10: feature_name=cg26016985                                        | feature_id[4407].value ><br>threshold=0.6493876278400421  |

|                                   |                                                           |
|-----------------------------------|-----------------------------------------------------------|
| node_16: feature_name=cg23157618  | feature_id[5511].value ><br>threshold=0.5759606957435608  |
| node_20: feature_name=cg10480329  | feature_id[1439].value ><br>threshold=0.5518321692943573  |
| node_48: feature_name=cg17843418  | feature_id[4868].value ><br>threshold=0.34969255328178406 |
| node_52: feature_name=cg24407065  | feature_id[4522].value ><br>threshold=0.5364363789558411  |
| node_56: feature_name=cg07281938  | feature_id[249].value ><br>threshold=0.7506992518901825   |
| node_78: feature_name=cg21759907  | feature_id[1650].value ><br>threshold=0.46823520958423615 |
| node_98: feature_name=cg10886334  | feature_id[3975].value ><br>threshold=0.43698127567768097 |
| node_102: feature_name=cg09373983 | feature_id[5025].value ><br>threshold=0.5575815737247467  |
| node_106: feature_name=cg12948116 | feature_id[5360].value <=<br>threshold=0.5658791363239288 |
| node_107: feature_name=cg21906519 | feature_id[5251].value ><br>threshold=0.6089984774589539  |
| node_111: feature_name=cg17537493 | feature_id[4217].value ><br>threshold=0.5825372636318207  |
| node_117: feature_name=cg15720017 | feature_id[4443].value ><br>threshold=0.7009969055652618  |
| node_119: feature_name=cg06038180 | feature_id[3480].value ><br>threshold=0.4583848565816879  |
| node_121: feature_name=cg08619651 | feature_id[4882].value <=<br>threshold=0.2105495035648346 |
| node_122: feature_name=cg01014262 | feature_id[1911].value <=<br>threshold=0.5327437818050385 |
| node_123: feature_name=cg16863382 | feature_id[2922].value ><br>threshold=0.7200668156147003  |
| node_133: feature_name=cg06989443 | feature_id[2327].value <=<br>threshold=0.6579365730285645 |
| node_134: feature_name=cg07344990 | feature_id[2398].value ><br>threshold=0.5562876164913177  |
| node_138: feature_name=cg02966841 | feature_id[2199].value ><br>threshold=0.7744501233100891  |
| node_204: feature_name=cg12120430 | feature_id[3727].value ><br>threshold=0.5775820016860962  |
| node_206: feature_name=cg18386876 | feature_id[4066].value ><br>threshold=0.6847257018089294  |
| node_208: feature_name=cg02053092 | feature_id[3610].value ><br>threshold=0.39507485926151276 |

|                                               |                                                           |
|-----------------------------------------------|-----------------------------------------------------------|
| node_210: feature_name=cg10298992             | feature_id[3603].value ><br>threshold=0.5707973837852478  |
| node_228: feature_name=cg03840920             | feature_id[4524].value ><br>threshold=0.5365143716335297  |
| node_234: feature_name=cg25364972             | feature_id[1792].value ><br>threshold=0.2418053299188614  |
| node_238: feature_name=cg23485307             | feature_id[221].value ><br>threshold=0.14884746074676514  |
| node_242: feature_name=cg04873169             | feature_id[4696].value ><br>threshold=0.6058756709098816  |
| node_244: feature_name=cg17009731             | feature_id[3218].value ><br>threshold=0.6602252125740051  |
| node_246: feature_name=cg18253910             | feature_id[4458].value ><br>threshold=0.6904322504997253  |
| node_250: feature_name=cg04774476             | feature_id[1257].value ><br>threshold=0.5675267577171326  |
| node_256: feature_name=cg19259111             | feature_id[63].value ><br>threshold=0.40771469473838806   |
| node_264: feature_name=cg21483216             | feature_id[5253].value ><br>threshold=0.6332719326019287  |
| node_266: feature_name=cg04026354             | feature_id[3502].value ><br>threshold=0.42332448065280914 |
| node_336: feature_name=cg05824594             | feature_id[1431].value ><br>threshold=0.629401296377182   |
| Class: angiomatoid fibrous histiocytoma (AFH) |                                                           |
|                                               |                                                           |
| Rules_33                                      | passed counts:10                                          |
| node_0: feature_name=cg11915444               | feature_id[2002].value ><br>threshold=0.3402601182460785  |
| node_10: feature_name=cg26016985              | feature_id[4407].value ><br>threshold=0.6493876278400421  |
| node_16: feature_name=cg23157618              | feature_id[5511].value ><br>threshold=0.5759606957435608  |
| node_20: feature_name=cg10480329              | feature_id[1439].value ><br>threshold=0.5518321692943573  |
| node_48: feature_name=cg17843418              | feature_id[4868].value ><br>threshold=0.34969255328178406 |
| node_52: feature_name=cg24407065              | feature_id[4522].value ><br>threshold=0.5364363789558411  |
| node_56: feature_name=cg07281938              | feature_id[249].value ><br>threshold=0.7506992518901825   |
| node_78: feature_name=cg21759907              | feature_id[1650].value ><br>threshold=0.46823520958423615 |



|                                   |                                                           |
|-----------------------------------|-----------------------------------------------------------|
| node_98: feature_name=cg10886334  | feature_id[3975].value ><br>threshold=0.43698127567768097 |
| node_102: feature_name=cg09373983 | feature_id[5025].value ><br>threshold=0.5575815737247467  |
| node_106: feature_name=cg12948116 | feature_id[5360].value <=<br>threshold=0.5658791363239288 |
| node_107: feature_name=cg21906519 | feature_id[5251].value ><br>threshold=0.6089984774589539  |
| node_111: feature_name=cg17537493 | feature_id[4217].value ><br>threshold=0.5825372636318207  |
| node_117: feature_name=cg15720017 | feature_id[4443].value ><br>threshold=0.7009969055652618  |
| node_119: feature_name=cg06038180 | feature_id[3480].value ><br>threshold=0.4583848565816879  |
| node_121: feature_name=cg08619651 | feature_id[4882].value <=<br>threshold=0.2105495035648346 |
| node_122: feature_name=cg01014262 | feature_id[1911].value <=<br>threshold=0.5327437818050385 |
| node_123: feature_name=cg16863382 | feature_id[2922].value ><br>threshold=0.7200668156147003  |
| node_133: feature_name=cg06989443 | feature_id[2327].value <=<br>threshold=0.6579365730285645 |
| node_134: feature_name=cg07344990 | feature_id[2398].value ><br>threshold=0.5562876164913177  |
| node_138: feature_name=cg02966841 | feature_id[2199].value ><br>threshold=0.7744501233100891  |
| node_204: feature_name=cg12120430 | feature_id[3727].value ><br>threshold=0.5775820016860962  |
| node_206: feature_name=cg18386876 | feature_id[4066].value ><br>threshold=0.6847257018089294  |
| node_208: feature_name=cg02053092 | feature_id[3610].value ><br>threshold=0.39507485926151276 |
| node_210: feature_name=cg10298992 | feature_id[3603].value ><br>threshold=0.5707973837852478  |
| node_228: feature_name=cg03840920 | feature_id[4524].value ><br>threshold=0.5365143716335297  |
| node_234: feature_name=cg25364972 | feature_id[1792].value ><br>threshold=0.2418053299188614  |
| node_238: feature_name=cg23485307 | feature_id[221].value ><br>threshold=0.14884746074676514  |
| node_242: feature_name=cg04873169 | feature_id[4696].value ><br>threshold=0.6058756709098816  |
| node_244: feature_name=cg17009731 | feature_id[3218].value ><br>threshold=0.6602252125740051  |

|                                   |                                                            |
|-----------------------------------|------------------------------------------------------------|
| node_246: feature_name=cg18253910 | feature_id[4458].value ><br>threshold=0.6904322504997253   |
| node_250: feature_name=cg04774476 | feature_id[1257].value ><br>threshold=0.5675267577171326   |
| node_256: feature_name=cg19259111 | feature_id[63].value ><br>threshold=0.40771469473838806    |
| node_264: feature_name=cg21483216 | feature_id[5253].value ><br>threshold=0.6332719326019287   |
| node_266: feature_name=cg04026354 | feature_id[3502].value <=<br>threshold=0.42332448065280914 |
| node_267: feature_name=cg11444072 | feature_id[116].value <=<br>threshold=0.4940422773361206   |
| node_268: feature_name=cg25424742 | feature_id[2698].value <=<br>threshold=0.762436032295227   |
| Class: reactive tissue (REA)      |                                                            |
|                                   |                                                            |
| Rules_34                          | passed counts:10                                           |
| node_0: feature_name=cg11915444   | feature_id[2002].value ><br>threshold=0.3402601182460785   |
| node_10: feature_name=cg26016985  | feature_id[4407].value ><br>threshold=0.6493876278400421   |
| node_16: feature_name=cg23157618  | feature_id[5511].value ><br>threshold=0.5759606957435608   |
| node_20: feature_name=cg10480329  | feature_id[1439].value ><br>threshold=0.5518321692943573   |
| node_48: feature_name=cg17843418  | feature_id[4868].value ><br>threshold=0.34969255328178406  |
| node_52: feature_name=cg24407065  | feature_id[4522].value ><br>threshold=0.5364363789558411   |
| node_56: feature_name=cg07281938  | feature_id[249].value ><br>threshold=0.7506992518901825    |
| node_78: feature_name=cg21759907  | feature_id[1650].value ><br>threshold=0.46823520958423615  |
| node_98: feature_name=cg10886334  | feature_id[3975].value ><br>threshold=0.43698127567768097  |
| node_102: feature_name=cg09373983 | feature_id[5025].value ><br>threshold=0.5575815737247467   |
| node_106: feature_name=cg12948116 | feature_id[5360].value <=<br>threshold=0.5658791363239288  |
| node_107: feature_name=cg21906519 | feature_id[5251].value ><br>threshold=0.6089984774589539   |
| node_111: feature_name=cg17537493 | feature_id[4217].value ><br>threshold=0.5825372636318207   |

|                                   |                                                           |
|-----------------------------------|-----------------------------------------------------------|
| node_117: feature_name=cg15720017 | feature_id[4443].value ><br>threshold=0.7009969055652618  |
| node_119: feature_name=cg06038180 | feature_id[3480].value ><br>threshold=0.4583848565816879  |
| node_121: feature_name=cg08619651 | feature_id[4882].value <=<br>threshold=0.2105495035648346 |
| node_122: feature_name=cg01014262 | feature_id[1911].value <=<br>threshold=0.5327437818050385 |
| node_123: feature_name=cg16863382 | feature_id[2922].value ><br>threshold=0.7200668156147003  |
| node_133: feature_name=cg06989443 | feature_id[2327].value <=<br>threshold=0.6579365730285645 |
| node_134: feature_name=cg07344990 | feature_id[2398].value ><br>threshold=0.5562876164913177  |
| node_138: feature_name=cg02966841 | feature_id[2199].value ><br>threshold=0.7744501233100891  |
| node_204: feature_name=cg12120430 | feature_id[3727].value ><br>threshold=0.5775820016860962  |
| node_206: feature_name=cg18386876 | feature_id[4066].value ><br>threshold=0.6847257018089294  |
| node_208: feature_name=cg02053092 | feature_id[3610].value ><br>threshold=0.39507485926151276 |
| node_210: feature_name=cg10298992 | feature_id[3603].value ><br>threshold=0.5707973837852478  |
| node_228: feature_name=cg03840920 | feature_id[4524].value ><br>threshold=0.5365143716335297  |
| node_234: feature_name=cg25364972 | feature_id[1792].value ><br>threshold=0.2418053299188614  |
| node_238: feature_name=cg23485307 | feature_id[221].value ><br>threshold=0.14884746074676514  |
| node_242: feature_name=cg04873169 | feature_id[4696].value ><br>threshold=0.6058756709098816  |
| node_244: feature_name=cg17009731 | feature_id[3218].value ><br>threshold=0.6602252125740051  |
| node_246: feature_name=cg18253910 | feature_id[4458].value ><br>threshold=0.6904322504997253  |
| node_250: feature_name=cg04774476 | feature_id[1257].value <=<br>threshold=0.5675267577171326 |
| node_251: feature_name=cg08276755 | feature_id[769].value ><br>threshold=0.5270942002534866   |
| Class: nodular fasciitis(NFA)     |                                                           |
|                                   |                                                           |
| Rules_35                          | passed counts:10                                          |

|                                   |                                                           |
|-----------------------------------|-----------------------------------------------------------|
| node_0: feature_name=cg11915444   | feature_id[2002].value ><br>threshold=0.3402601182460785  |
| node_10: feature_name=cg26016985  | feature_id[4407].value ><br>threshold=0.6493876278400421  |
| node_16: feature_name=cg23157618  | feature_id[5511].value ><br>threshold=0.5759606957435608  |
| node_20: feature_name=cg10480329  | feature_id[1439].value ><br>threshold=0.5518321692943573  |
| node_48: feature_name=cg17843418  | feature_id[4868].value ><br>threshold=0.34969255328178406 |
| node_52: feature_name=cg24407065  | feature_id[4522].value ><br>threshold=0.5364363789558411  |
| node_56: feature_name=cg07281938  | feature_id[249].value ><br>threshold=0.7506992518901825   |
| node_78: feature_name=cg21759907  | feature_id[1650].value ><br>threshold=0.46823520958423615 |
| node_98: feature_name=cg10886334  | feature_id[3975].value ><br>threshold=0.43698127567768097 |
| node_102: feature_name=cg09373983 | feature_id[5025].value ><br>threshold=0.5575815737247467  |
| node_106: feature_name=cg12948116 | feature_id[5360].value <=<br>threshold=0.5658791363239288 |
| node_107: feature_name=cg21906519 | feature_id[5251].value ><br>threshold=0.6089984774589539  |
| node_111: feature_name=cg17537493 | feature_id[4217].value ><br>threshold=0.5825372636318207  |
| node_117: feature_name=cg15720017 | feature_id[4443].value ><br>threshold=0.7009969055652618  |
| node_119: feature_name=cg06038180 | feature_id[3480].value ><br>threshold=0.4583848565816879  |
| node_121: feature_name=cg08619651 | feature_id[4882].value <=<br>threshold=0.2105495035648346 |
| node_122: feature_name=cg01014262 | feature_id[1911].value <=<br>threshold=0.5327437818050385 |
| node_123: feature_name=cg16863382 | feature_id[2922].value ><br>threshold=0.7200668156147003  |
| node_133: feature_name=cg06989443 | feature_id[2327].value <=<br>threshold=0.6579365730285645 |
| node_134: feature_name=cg07344990 | feature_id[2398].value ><br>threshold=0.5562876164913177  |
| node_138: feature_name=cg02966841 | feature_id[2199].value ><br>threshold=0.7744501233100891  |
| node_204: feature_name=cg12120430 | feature_id[3727].value ><br>threshold=0.5775820016860962  |

|                                                      |                                                           |
|------------------------------------------------------|-----------------------------------------------------------|
| node_206: feature_name=cg18386876                    | feature_id[4066].value ><br>threshold=0.6847257018089294  |
| node_208: feature_name=cg02053092                    | feature_id[3610].value ><br>threshold=0.39507485926151276 |
| node_210: feature_name=cg10298992                    | feature_id[3603].value ><br>threshold=0.5707973837852478  |
| node_228: feature_name=cg03840920                    | feature_id[4524].value ><br>threshold=0.5365143716335297  |
| node_234: feature_name=cg25364972                    | feature_id[1792].value ><br>threshold=0.2418053299188614  |
| node_238: feature_name=cg23485307                    | feature_id[221].value ><br>threshold=0.14884746074676514  |
| node_242: feature_name=cg04873169                    | feature_id[4696].value <=<br>threshold=0.6058756709098816 |
| Class: cutaneous squamous cell carcinoma (SCC (CUT)) |                                                           |
|                                                      |                                                           |
| Rules_36                                             | passed counts:10                                          |
| node_0: feature_name=cg11915444                      | feature_id[2002].value ><br>threshold=0.3402601182460785  |
| node_10: feature_name=cg26016985                     | feature_id[4407].value ><br>threshold=0.6493876278400421  |
| node_16: feature_name=cg23157618                     | feature_id[5511].value ><br>threshold=0.5759606957435608  |
| node_20: feature_name=cg10480329                     | feature_id[1439].value ><br>threshold=0.5518321692943573  |
| node_48: feature_name=cg17843418                     | feature_id[4868].value ><br>threshold=0.34969255328178406 |
| node_52: feature_name=cg24407065                     | feature_id[4522].value ><br>threshold=0.5364363789558411  |
| node_56: feature_name=cg07281938                     | feature_id[249].value ><br>threshold=0.7506992518901825   |
| node_78: feature_name=cg21759907                     | feature_id[1650].value ><br>threshold=0.46823520958423615 |
| node_98: feature_name=cg10886334                     | feature_id[3975].value ><br>threshold=0.43698127567768097 |
| node_102: feature_name=cg09373983                    | feature_id[5025].value ><br>threshold=0.5575815737247467  |
| node_106: feature_name=cg12948116                    | feature_id[5360].value <=<br>threshold=0.5658791363239288 |
| node_107: feature_name=cg21906519                    | feature_id[5251].value ><br>threshold=0.6089984774589539  |

|                                   |                                                           |
|-----------------------------------|-----------------------------------------------------------|
| node_111: feature_name=cg17537493 | feature_id[4217].value ><br>threshold=0.5825372636318207  |
| node_117: feature_name=cg15720017 | feature_id[4443].value ><br>threshold=0.7009969055652618  |
| node_119: feature_name=cg06038180 | feature_id[3480].value ><br>threshold=0.4583848565816879  |
| node_121: feature_name=cg08619651 | feature_id[4882].value <=<br>threshold=0.2105495035648346 |
| node_122: feature_name=cg01014262 | feature_id[1911].value <=<br>threshold=0.5327437818050385 |
| node_123: feature_name=cg16863382 | feature_id[2922].value ><br>threshold=0.7200668156147003  |
| node_133: feature_name=cg06989443 | feature_id[2327].value <=<br>threshold=0.6579365730285645 |
| node_134: feature_name=cg07344990 | feature_id[2398].value ><br>threshold=0.5562876164913177  |
| node_138: feature_name=cg02966841 | feature_id[2199].value ><br>threshold=0.7744501233100891  |
| node_204: feature_name=cg12120430 | feature_id[3727].value ><br>threshold=0.5775820016860962  |
| node_206: feature_name=cg18386876 | feature_id[4066].value ><br>threshold=0.6847257018089294  |
| node_208: feature_name=cg02053092 | feature_id[3610].value ><br>threshold=0.39507485926151276 |
| node_210: feature_name=cg10298992 | feature_id[3603].value ><br>threshold=0.5707973837852478  |
| node_228: feature_name=cg03840920 | feature_id[4524].value ><br>threshold=0.5365143716335297  |
| node_234: feature_name=cg25364972 | feature_id[1792].value ><br>threshold=0.2418053299188614  |
| node_238: feature_name=cg23485307 | feature_id[221].value <=<br>threshold=0.14884746074676514 |
| node_239: feature_name=cg13972711 | feature_id[4461].value ><br>threshold=0.8822346031665802  |
| Class: control (CTRL)             |                                                           |
|                                   |                                                           |
| Rules_37                          | passed counts:9                                           |
| node_0: feature_name=cg11915444   | feature_id[2002].value ><br>threshold=0.3402601182460785  |
| node_10: feature_name=cg26016985  | feature_id[4407].value ><br>threshold=0.6493876278400421  |
| node_16: feature_name=cg23157618  | feature_id[5511].value ><br>threshold=0.5759606957435608  |

|                                   |                                                           |
|-----------------------------------|-----------------------------------------------------------|
| node_20: feature_name=cg10480329  | feature_id[1439].value ><br>threshold=0.5518321692943573  |
| node_48: feature_name=cg17843418  | feature_id[4868].value ><br>threshold=0.34969255328178406 |
| node_52: feature_name=cg24407065  | feature_id[4522].value ><br>threshold=0.5364363789558411  |
| node_56: feature_name=cg07281938  | feature_id[249].value ><br>threshold=0.7506992518901825   |
| node_78: feature_name=cg21759907  | feature_id[1650].value ><br>threshold=0.46823520958423615 |
| node_98: feature_name=cg10886334  | feature_id[3975].value ><br>threshold=0.43698127567768097 |
| node_102: feature_name=cg09373983 | feature_id[5025].value ><br>threshold=0.5575815737247467  |
| node_106: feature_name=cg12948116 | feature_id[5360].value <=<br>threshold=0.5658791363239288 |
| node_107: feature_name=cg21906519 | feature_id[5251].value ><br>threshold=0.6089984774589539  |
| node_111: feature_name=cg17537493 | feature_id[4217].value ><br>threshold=0.5825372636318207  |
| node_117: feature_name=cg15720017 | feature_id[4443].value ><br>threshold=0.7009969055652618  |
| node_119: feature_name=cg06038180 | feature_id[3480].value ><br>threshold=0.4583848565816879  |
| node_121: feature_name=cg08619651 | feature_id[4882].value <=<br>threshold=0.2105495035648346 |
| node_122: feature_name=cg01014262 | feature_id[1911].value <=<br>threshold=0.5327437818050385 |
| node_123: feature_name=cg16863382 | feature_id[2922].value ><br>threshold=0.7200668156147003  |
| node_133: feature_name=cg06989443 | feature_id[2327].value <=<br>threshold=0.6579365730285645 |
| node_134: feature_name=cg07344990 | feature_id[2398].value ><br>threshold=0.5562876164913177  |
| node_138: feature_name=cg02966841 | feature_id[2199].value ><br>threshold=0.7744501233100891  |
| node_204: feature_name=cg12120430 | feature_id[3727].value ><br>threshold=0.5775820016860962  |
| node_206: feature_name=cg18386876 | feature_id[4066].value ><br>threshold=0.6847257018089294  |
| node_208: feature_name=cg02053092 | feature_id[3610].value ><br>threshold=0.39507485926151276 |
| node_210: feature_name=cg10298992 | feature_id[3603].value ><br>threshold=0.5707973837852478  |

|                                   |                                                            |
|-----------------------------------|------------------------------------------------------------|
| node_228: feature_name=cg03840920 | feature_id[4524].value ><br>threshold=0.5365143716335297   |
| node_234: feature_name=cg25364972 | feature_id[1792].value ><br>threshold=0.2418053299188614   |
| node_238: feature_name=cg23485307 | feature_id[221].value ><br>threshold=0.14884746074676514   |
| node_242: feature_name=cg04873169 | feature_id[4696].value ><br>threshold=0.6058756709098816   |
| node_244: feature_name=cg17009731 | feature_id[3218].value ><br>threshold=0.6602252125740051   |
| node_246: feature_name=cg18253910 | feature_id[4458].value ><br>threshold=0.6904322504997253   |
| node_250: feature_name=cg04774476 | feature_id[1257].value ><br>threshold=0.5675267577171326   |
| node_256: feature_name=cg19259111 | feature_id[63].value ><br>threshold=0.40771469473838806    |
| node_264: feature_name=cg21483216 | feature_id[5253].value ><br>threshold=0.6332719326019287   |
| node_266: feature_name=cg04026354 | feature_id[3502].value <=<br>threshold=0.42332448065280914 |
| node_267: feature_name=cg11444072 | feature_id[116].value ><br>threshold=0.4940422773361206    |
| node_273: feature_name=cg08571020 | feature_id[381].value ><br>threshold=0.4616774618625641    |
| node_275: feature_name=cg08331427 | feature_id[2081].value ><br>threshold=0.5443233847618103   |
| node_281: feature_name=cg00216961 | feature_id[945].value ><br>threshold=0.4166988283395767    |
| node_333: feature_name=cg23366832 | feature_id[2439].value ><br>threshold=0.8551825881004333   |
| Class: lipoma (LIPO)              |                                                            |
|                                   |                                                            |
| Rules_38                          | passed counts:9                                            |
| node_0: feature_name=cg11915444   | feature_id[2002].value ><br>threshold=0.3402601182460785   |
| node_10: feature_name=cg26016985  | feature_id[4407].value ><br>threshold=0.6493876278400421   |
| node_16: feature_name=cg23157618  | feature_id[5511].value ><br>threshold=0.5759606957435608   |
| node_20: feature_name=cg10480329  | feature_id[1439].value ><br>threshold=0.5518321692943573   |
| node_48: feature_name=cg17843418  | feature_id[4868].value ><br>threshold=0.34969255328178406  |



|                                   |                                                           |
|-----------------------------------|-----------------------------------------------------------|
| node_52: feature_name=cg24407065  | feature_id[4522].value ><br>threshold=0.5364363789558411  |
| node_56: feature_name=cg07281938  | feature_id[249].value ><br>threshold=0.7506992518901825   |
| node_78: feature_name=cg21759907  | feature_id[1650].value ><br>threshold=0.46823520958423615 |
| node_98: feature_name=cg10886334  | feature_id[3975].value ><br>threshold=0.43698127567768097 |
| node_102: feature_name=cg09373983 | feature_id[5025].value ><br>threshold=0.5575815737247467  |
| node_106: feature_name=cg12948116 | feature_id[5360].value <=<br>threshold=0.5658791363239288 |
| node_107: feature_name=cg21906519 | feature_id[5251].value ><br>threshold=0.6089984774589539  |
| node_111: feature_name=cg17537493 | feature_id[4217].value ><br>threshold=0.5825372636318207  |
| node_117: feature_name=cg15720017 | feature_id[4443].value ><br>threshold=0.7009969055652618  |
| node_119: feature_name=cg06038180 | feature_id[3480].value ><br>threshold=0.4583848565816879  |
| node_121: feature_name=cg08619651 | feature_id[4882].value <=<br>threshold=0.2105495035648346 |
| node_122: feature_name=cg01014262 | feature_id[1911].value <=<br>threshold=0.5327437818050385 |
| node_123: feature_name=cg16863382 | feature_id[2922].value ><br>threshold=0.7200668156147003  |
| node_133: feature_name=cg06989443 | feature_id[2327].value <=<br>threshold=0.6579365730285645 |
| node_134: feature_name=cg07344990 | feature_id[2398].value ><br>threshold=0.5562876164913177  |
| node_138: feature_name=cg02966841 | feature_id[2199].value ><br>threshold=0.7744501233100891  |
| node_204: feature_name=cg12120430 | feature_id[3727].value ><br>threshold=0.5775820016860962  |
| node_206: feature_name=cg18386876 | feature_id[4066].value ><br>threshold=0.6847257018089294  |
| node_208: feature_name=cg02053092 | feature_id[3610].value ><br>threshold=0.39507485926151276 |
| node_210: feature_name=cg10298992 | feature_id[3603].value ><br>threshold=0.5707973837852478  |
| node_228: feature_name=cg03840920 | feature_id[4524].value ><br>threshold=0.5365143716335297  |
| node_234: feature_name=cg25364972 | feature_id[1792].value ><br>threshold=0.2418053299188614  |

|                                                                                   |                                                            |
|-----------------------------------------------------------------------------------|------------------------------------------------------------|
| node_238: feature_name=cg23485307                                                 | feature_id[221].value ><br>threshold=0.14884746074676514   |
| node_242: feature_name=cg04873169                                                 | feature_id[4696].value ><br>threshold=0.6058756709098816   |
| node_244: feature_name=cg17009731                                                 | feature_id[3218].value ><br>threshold=0.6602252125740051   |
| node_246: feature_name=cg18253910                                                 | feature_id[4458].value ><br>threshold=0.6904322504997253   |
| node_250: feature_name=cg04774476                                                 | feature_id[1257].value ><br>threshold=0.5675267577171326   |
| node_256: feature_name=cg19259111                                                 | feature_id[63].value ><br>threshold=0.40771469473838806    |
| node_264: feature_name=cg21483216                                                 | feature_id[5253].value ><br>threshold=0.6332719326019287   |
| node_266: feature_name=cg04026354                                                 | feature_id[3502].value <=<br>threshold=0.42332448065280914 |
| node_267: feature_name=cg11444072                                                 | feature_id[116].value ><br>threshold=0.4940422773361206    |
| node_273: feature_name=cg08571020                                                 | feature_id[381].value ><br>threshold=0.4616774618625641    |
| node_275: feature_name=cg08331427                                                 | feature_id[2081].value ><br>threshold=0.5443233847618103   |
| node_281: feature_name=cg00216961                                                 | feature_id[945].value <=<br>threshold=0.4166988283395767   |
| node_282: feature_name=cg04716580                                                 | feature_id[1390].value ><br>threshold=0.4204266667366028   |
| node_286: feature_name=cg07891483                                                 | feature_id[1877].value ><br>threshold=0.829958975315094    |
| node_288: feature_name=cg01475325                                                 | feature_id[3969].value ><br>threshold=0.45323844254016876  |
| node_292: feature_name=cg19702397                                                 | feature_id[2066].value ><br>threshold=0.3536848723888397   |
| node_294: feature_name=cg21936959                                                 | feature_id[595].value <=<br>threshold=0.5567200481891632   |
| node_295: feature_name=cg05251593                                                 | feature_id[515].value ><br>threshold=0.5597732663154602    |
| Class: well differentiated liposarcoma (WDLS)/dedifferentiated liposarcoma (DDLs) |                                                            |
|                                                                                   |                                                            |
| Rules_39                                                                          | passed counts:9                                            |
| node_0: feature_name=cg11915444                                                   | feature_id[2002].value ><br>threshold=0.3402601182460785   |

|                                   |                                                           |
|-----------------------------------|-----------------------------------------------------------|
| node_10: feature_name=cg26016985  | feature_id[4407].value ><br>threshold=0.6493876278400421  |
| node_16: feature_name=cg23157618  | feature_id[5511].value ><br>threshold=0.5759606957435608  |
| node_20: feature_name=cg10480329  | feature_id[1439].value ><br>threshold=0.5518321692943573  |
| node_48: feature_name=cg17843418  | feature_id[4868].value ><br>threshold=0.34969255328178406 |
| node_52: feature_name=cg24407065  | feature_id[4522].value ><br>threshold=0.5364363789558411  |
| node_56: feature_name=cg07281938  | feature_id[249].value ><br>threshold=0.7506992518901825   |
| node_78: feature_name=cg21759907  | feature_id[1650].value ><br>threshold=0.46823520958423615 |
| node_98: feature_name=cg10886334  | feature_id[3975].value ><br>threshold=0.43698127567768097 |
| node_102: feature_name=cg09373983 | feature_id[5025].value ><br>threshold=0.5575815737247467  |
| node_106: feature_name=cg12948116 | feature_id[5360].value <=<br>threshold=0.5658791363239288 |
| node_107: feature_name=cg21906519 | feature_id[5251].value ><br>threshold=0.6089984774589539  |
| node_111: feature_name=cg17537493 | feature_id[4217].value ><br>threshold=0.5825372636318207  |
| node_117: feature_name=cg15720017 | feature_id[4443].value ><br>threshold=0.7009969055652618  |
| node_119: feature_name=cg06038180 | feature_id[3480].value ><br>threshold=0.4583848565816879  |
| node_121: feature_name=cg08619651 | feature_id[4882].value <=<br>threshold=0.2105495035648346 |
| node_122: feature_name=cg01014262 | feature_id[1911].value <=<br>threshold=0.5327437818050385 |
| node_123: feature_name=cg16863382 | feature_id[2922].value ><br>threshold=0.7200668156147003  |
| node_133: feature_name=cg06989443 | feature_id[2327].value <=<br>threshold=0.6579365730285645 |
| node_134: feature_name=cg07344990 | feature_id[2398].value ><br>threshold=0.5562876164913177  |
| node_138: feature_name=cg02966841 | feature_id[2199].value ><br>threshold=0.7744501233100891  |
| node_204: feature_name=cg12120430 | feature_id[3727].value ><br>threshold=0.5775820016860962  |
| node_206: feature_name=cg18386876 | feature_id[4066].value ><br>threshold=0.6847257018089294  |

|                                   |                                                           |
|-----------------------------------|-----------------------------------------------------------|
| node_208: feature_name=cg02053092 | feature_id[3610].value ><br>threshold=0.39507485926151276 |
| node_210: feature_name=cg10298992 | feature_id[3603].value ><br>threshold=0.5707973837852478  |
| node_228: feature_name=cg03840920 | feature_id[4524].value ><br>threshold=0.5365143716335297  |
| node_234: feature_name=cg25364972 | feature_id[1792].value ><br>threshold=0.2418053299188614  |
| node_238: feature_name=cg23485307 | feature_id[221].value ><br>threshold=0.14884746074676514  |
| node_242: feature_name=cg04873169 | feature_id[4696].value ><br>threshold=0.6058756709098816  |
| node_244: feature_name=cg17009731 | feature_id[3218].value ><br>threshold=0.6602252125740051  |
| node_246: feature_name=cg18253910 | feature_id[4458].value <=<br>threshold=0.6904322504997253 |
| node_247: feature_name=cg01559356 | feature_id[3236].value ><br>threshold=0.089854396879673   |
| Class: neurofibroma (NFB)         |                                                           |
|                                   |                                                           |
| Rules_40                          | passed counts:9                                           |
| node_0: feature_name=cg11915444   | feature_id[2002].value ><br>threshold=0.3402601182460785  |
| node_10: feature_name=cg26016985  | feature_id[4407].value ><br>threshold=0.6493876278400421  |
| node_16: feature_name=cg23157618  | feature_id[5511].value ><br>threshold=0.5759606957435608  |
| node_20: feature_name=cg10480329  | feature_id[1439].value ><br>threshold=0.5518321692943573  |
| node_48: feature_name=cg17843418  | feature_id[4868].value ><br>threshold=0.34969255328178406 |
| node_52: feature_name=cg24407065  | feature_id[4522].value ><br>threshold=0.5364363789558411  |
| node_56: feature_name=cg07281938  | feature_id[249].value ><br>threshold=0.7506992518901825   |
| node_78: feature_name=cg21759907  | feature_id[1650].value ><br>threshold=0.46823520958423615 |
| node_98: feature_name=cg10886334  | feature_id[3975].value ><br>threshold=0.43698127567768097 |
| node_102: feature_name=cg09373983 | feature_id[5025].value ><br>threshold=0.5575815737247467  |
| node_106: feature_name=cg12948116 | feature_id[5360].value <=<br>threshold=0.5658791363239288 |

|                                                   |                                                           |
|---------------------------------------------------|-----------------------------------------------------------|
| node_107: feature_name=cg21906519                 | feature_id[5251].value ><br>threshold=0.6089984774589539  |
| node_111: feature_name=cg17537493                 | feature_id[4217].value ><br>threshold=0.5825372636318207  |
| node_117: feature_name=cg15720017                 | feature_id[4443].value ><br>threshold=0.7009969055652618  |
| node_119: feature_name=cg06038180                 | feature_id[3480].value ><br>threshold=0.4583848565816879  |
| node_121: feature_name=cg08619651                 | feature_id[4882].value <=<br>threshold=0.2105495035648346 |
| node_122: feature_name=cg01014262                 | feature_id[1911].value <=<br>threshold=0.5327437818050385 |
| node_123: feature_name=cg16863382                 | feature_id[2922].value ><br>threshold=0.7200668156147003  |
| node_133: feature_name=cg06989443                 | feature_id[2327].value <=<br>threshold=0.6579365730285645 |
| node_134: feature_name=cg07344990                 | feature_id[2398].value ><br>threshold=0.5562876164913177  |
| node_138: feature_name=cg02966841                 | feature_id[2199].value ><br>threshold=0.7744501233100891  |
| node_204: feature_name=cg12120430                 | feature_id[3727].value ><br>threshold=0.5775820016860962  |
| node_206: feature_name=cg18386876                 | feature_id[4066].value ><br>threshold=0.6847257018089294  |
| node_208: feature_name=cg02053092                 | feature_id[3610].value ><br>threshold=0.39507485926151276 |
| node_210: feature_name=cg10298992                 | feature_id[3603].value ><br>threshold=0.5707973837852478  |
| node_228: feature_name=cg03840920                 | feature_id[4524].value ><br>threshold=0.5365143716335297  |
| node_234: feature_name=cg25364972                 | feature_id[1792].value ><br>threshold=0.2418053299188614  |
| node_238: feature_name=cg23485307                 | feature_id[221].value ><br>threshold=0.14884746074676514  |
| node_242: feature_name=cg04873169                 | feature_id[4696].value ><br>threshold=0.6058756709098816  |
| node_244: feature_name=cg17009731                 | feature_id[3218].value <=<br>threshold=0.6602252125740051 |
| Class: extraskeletal myxoid chondrosarcoma (EMCS) |                                                           |
|                                                   |                                                           |
| Rules_41                                          | passed counts:9                                           |

|                                         |                                                           |
|-----------------------------------------|-----------------------------------------------------------|
| node_0: feature_name=cg11915444         | feature_id[2002].value ><br>threshold=0.3402601182460785  |
| node_10: feature_name=cg26016985        | feature_id[4407].value ><br>threshold=0.6493876278400421  |
| node_16: feature_name=cg23157618        | feature_id[5511].value ><br>threshold=0.5759606957435608  |
| node_20: feature_name=cg10480329        | feature_id[1439].value <=<br>threshold=0.5518321692943573 |
| node_21: feature_name=cg25510609        | feature_id[149].value <=<br>threshold=0.08151235431432724 |
| node_22: feature_name=cg23850277        | feature_id[2159].value ><br>threshold=0.5682950615882874  |
| Class: giant cell tumour of bone (GCTB) |                                                           |
|                                         |                                                           |
| Rules_42                                | passed counts:8                                           |
| node_0: feature_name=cg11915444         | feature_id[2002].value ><br>threshold=0.3402601182460785  |
| node_10: feature_name=cg26016985        | feature_id[4407].value ><br>threshold=0.6493876278400421  |
| node_16: feature_name=cg23157618        | feature_id[5511].value ><br>threshold=0.5759606957435608  |
| node_20: feature_name=cg10480329        | feature_id[1439].value ><br>threshold=0.5518321692943573  |
| node_48: feature_name=cg17843418        | feature_id[4868].value ><br>threshold=0.34969255328178406 |
| node_52: feature_name=cg24407065        | feature_id[4522].value ><br>threshold=0.5364363789558411  |
| node_56: feature_name=cg07281938        | feature_id[249].value ><br>threshold=0.7506992518901825   |
| node_78: feature_name=cg21759907        | feature_id[1650].value ><br>threshold=0.46823520958423615 |
| node_98: feature_name=cg10886334        | feature_id[3975].value ><br>threshold=0.43698127567768097 |
| node_102: feature_name=cg09373983       | feature_id[5025].value ><br>threshold=0.5575815737247467  |
| node_106: feature_name=cg12948116       | feature_id[5360].value <=<br>threshold=0.5658791363239288 |
| node_107: feature_name=cg21906519       | feature_id[5251].value ><br>threshold=0.6089984774589539  |
| node_111: feature_name=cg17537493       | feature_id[4217].value ><br>threshold=0.5825372636318207  |
| node_117: feature_name=cg15720017       | feature_id[4443].value ><br>threshold=0.7009969055652618  |

|                                   |                                                            |
|-----------------------------------|------------------------------------------------------------|
| node_119: feature_name=cg06038180 | feature_id[3480].value ><br>threshold=0.4583848565816879   |
| node_121: feature_name=cg08619651 | feature_id[4882].value <=<br>threshold=0.2105495035648346  |
| node_122: feature_name=cg01014262 | feature_id[1911].value <=<br>threshold=0.5327437818050385  |
| node_123: feature_name=cg16863382 | feature_id[2922].value ><br>threshold=0.7200668156147003   |
| node_133: feature_name=cg06989443 | feature_id[2327].value <=<br>threshold=0.6579365730285645  |
| node_134: feature_name=cg07344990 | feature_id[2398].value ><br>threshold=0.5562876164913177   |
| node_138: feature_name=cg02966841 | feature_id[2199].value ><br>threshold=0.7744501233100891   |
| node_204: feature_name=cg12120430 | feature_id[3727].value ><br>threshold=0.5775820016860962   |
| node_206: feature_name=cg18386876 | feature_id[4066].value ><br>threshold=0.6847257018089294   |
| node_208: feature_name=cg02053092 | feature_id[3610].value ><br>threshold=0.39507485926151276  |
| node_210: feature_name=cg10298992 | feature_id[3603].value ><br>threshold=0.5707973837852478   |
| node_228: feature_name=cg03840920 | feature_id[4524].value ><br>threshold=0.5365143716335297   |
| node_234: feature_name=cg25364972 | feature_id[1792].value ><br>threshold=0.2418053299188614   |
| node_238: feature_name=cg23485307 | feature_id[221].value ><br>threshold=0.14884746074676514   |
| node_242: feature_name=cg04873169 | feature_id[4696].value ><br>threshold=0.6058756709098816   |
| node_244: feature_name=cg17009731 | feature_id[3218].value ><br>threshold=0.6602252125740051   |
| node_246: feature_name=cg18253910 | feature_id[4458].value ><br>threshold=0.6904322504997253   |
| node_250: feature_name=cg04774476 | feature_id[1257].value ><br>threshold=0.5675267577171326   |
| node_256: feature_name=cg19259111 | feature_id[63].value ><br>threshold=0.40771469473838806    |
| node_264: feature_name=cg21483216 | feature_id[5253].value ><br>threshold=0.6332719326019287   |
| node_266: feature_name=cg04026354 | feature_id[3502].value <=<br>threshold=0.42332448065280914 |
| node_267: feature_name=cg11444072 | feature_id[116].value ><br>threshold=0.4940422773361206    |

|                                                |                                                           |
|------------------------------------------------|-----------------------------------------------------------|
| node_273: feature_name=cg08571020              | feature_id[381].value ><br>threshold=0.4616774618625641   |
| node_275: feature_name=cg08331427              | feature_id[2081].value <=<br>threshold=0.5443233847618103 |
| node_276: feature_name=cg23936766              | feature_id[683].value <=<br>threshold=0.3338508605957031  |
| Class: epithelioid haemangioendothelioma (EHE) |                                                           |
| Rules_43                                       | passed counts:8                                           |
| node_0: feature_name=cg11915444                | feature_id[2002].value ><br>threshold=0.3402601182460785  |
| node_10: feature_name=cg26016985               | feature_id[4407].value ><br>threshold=0.6493876278400421  |
| node_16: feature_name=cg23157618               | feature_id[5511].value ><br>threshold=0.5759606957435608  |
| node_20: feature_name=cg10480329               | feature_id[1439].value ><br>threshold=0.5518321692943573  |
| node_48: feature_name=cg17843418               | feature_id[4868].value ><br>threshold=0.34969255328178406 |
| node_52: feature_name=cg24407065               | feature_id[4522].value ><br>threshold=0.5364363789558411  |
| node_56: feature_name=cg07281938               | feature_id[249].value ><br>threshold=0.7506992518901825   |
| node_78: feature_name=cg21759907               | feature_id[1650].value ><br>threshold=0.46823520958423615 |
| node_98: feature_name=cg10886334               | feature_id[3975].value ><br>threshold=0.43698127567768097 |
| node_102: feature_name=cg09373983              | feature_id[5025].value ><br>threshold=0.5575815737247467  |
| node_106: feature_name=cg12948116              | feature_id[5360].value <=<br>threshold=0.5658791363239288 |
| node_107: feature_name=cg21906519              | feature_id[5251].value ><br>threshold=0.6089984774589539  |
| node_111: feature_name=cg17537493              | feature_id[4217].value ><br>threshold=0.5825372636318207  |
| node_117: feature_name=cg15720017              | feature_id[4443].value ><br>threshold=0.7009969055652618  |
| node_119: feature_name=cg06038180              | feature_id[3480].value ><br>threshold=0.4583848565816879  |
| node_121: feature_name=cg08619651              | feature_id[4882].value <=<br>threshold=0.2105495035648346 |
| node_122: feature_name=cg01014262              | feature_id[1911].value <=<br>threshold=0.5327437818050385 |



|                                   |                                                           |
|-----------------------------------|-----------------------------------------------------------|
| node_123: feature_name=cg16863382 | feature_id[2922].value ><br>threshold=0.7200668156147003  |
| node_133: feature_name=cg06989443 | feature_id[2327].value <=<br>threshold=0.6579365730285645 |
| node_134: feature_name=cg07344990 | feature_id[2398].value ><br>threshold=0.5562876164913177  |
| node_138: feature_name=cg02966841 | feature_id[2199].value ><br>threshold=0.7744501233100891  |
| node_204: feature_name=cg12120430 | feature_id[3727].value ><br>threshold=0.5775820016860962  |
| node_206: feature_name=cg18386876 | feature_id[4066].value ><br>threshold=0.6847257018089294  |
| node_208: feature_name=cg02053092 | feature_id[3610].value ><br>threshold=0.39507485926151276 |
| node_210: feature_name=cg10298992 | feature_id[3603].value ><br>threshold=0.5707973837852478  |
| node_228: feature_name=cg03840920 | feature_id[4524].value ><br>threshold=0.5365143716335297  |
| node_234: feature_name=cg25364972 | feature_id[1792].value ><br>threshold=0.2418053299188614  |
| node_238: feature_name=cg23485307 | feature_id[221].value ><br>threshold=0.14884746074676514  |
| node_242: feature_name=cg04873169 | feature_id[4696].value ><br>threshold=0.6058756709098816  |
| node_244: feature_name=cg17009731 | feature_id[3218].value ><br>threshold=0.6602252125740051  |
| node_246: feature_name=cg18253910 | feature_id[4458].value ><br>threshold=0.6904322504997253  |
| node_250: feature_name=cg04774476 | feature_id[1257].value ><br>threshold=0.5675267577171326  |
| node_256: feature_name=cg19259111 | feature_id[63].value ><br>threshold=0.40771469473838806   |
| node_264: feature_name=cg21483216 | feature_id[5253].value <=<br>threshold=0.6332719326019287 |
| Class: muscle tissue (MUS)        |                                                           |
|                                   |                                                           |
| Rules_44                          | passed counts:8                                           |
| node_0: feature_name=cg11915444   | feature_id[2002].value ><br>threshold=0.3402601182460785  |
| node_10: feature_name=cg26016985  | feature_id[4407].value ><br>threshold=0.6493876278400421  |
| node_16: feature_name=cg23157618  | feature_id[5511].value ><br>threshold=0.5759606957435608  |

|                                   |                                                           |
|-----------------------------------|-----------------------------------------------------------|
| node_20: feature_name=cg10480329  | feature_id[1439].value ><br>threshold=0.5518321692943573  |
| node_48: feature_name=cg17843418  | feature_id[4868].value ><br>threshold=0.34969255328178406 |
| node_52: feature_name=cg24407065  | feature_id[4522].value ><br>threshold=0.5364363789558411  |
| node_56: feature_name=cg07281938  | feature_id[249].value ><br>threshold=0.7506992518901825   |
| node_78: feature_name=cg21759907  | feature_id[1650].value ><br>threshold=0.46823520958423615 |
| node_98: feature_name=cg10886334  | feature_id[3975].value ><br>threshold=0.43698127567768097 |
| node_102: feature_name=cg09373983 | feature_id[5025].value ><br>threshold=0.5575815737247467  |
| node_106: feature_name=cg12948116 | feature_id[5360].value <=<br>threshold=0.5658791363239288 |
| node_107: feature_name=cg21906519 | feature_id[5251].value ><br>threshold=0.6089984774589539  |
| node_111: feature_name=cg17537493 | feature_id[4217].value ><br>threshold=0.5825372636318207  |
| node_117: feature_name=cg15720017 | feature_id[4443].value ><br>threshold=0.7009969055652618  |
| node_119: feature_name=cg06038180 | feature_id[3480].value ><br>threshold=0.4583848565816879  |
| node_121: feature_name=cg08619651 | feature_id[4882].value <=<br>threshold=0.2105495035648346 |
| node_122: feature_name=cg01014262 | feature_id[1911].value <=<br>threshold=0.5327437818050385 |
| node_123: feature_name=cg16863382 | feature_id[2922].value ><br>threshold=0.7200668156147003  |
| node_133: feature_name=cg06989443 | feature_id[2327].value <=<br>threshold=0.6579365730285645 |
| node_134: feature_name=cg07344990 | feature_id[2398].value ><br>threshold=0.5562876164913177  |
| node_138: feature_name=cg02966841 | feature_id[2199].value ><br>threshold=0.7744501233100891  |
| node_204: feature_name=cg12120430 | feature_id[3727].value ><br>threshold=0.5775820016860962  |
| node_206: feature_name=cg18386876 | feature_id[4066].value ><br>threshold=0.6847257018089294  |
| node_208: feature_name=cg02053092 | feature_id[3610].value ><br>threshold=0.39507485926151276 |
| node_210: feature_name=cg10298992 | feature_id[3603].value ><br>threshold=0.5707973837852478  |

|                                   |                                                           |
|-----------------------------------|-----------------------------------------------------------|
| node_228: feature_name=cg03840920 | feature_id[4524].value ><br>threshold=0.5365143716335297  |
| node_234: feature_name=cg25364972 | feature_id[1792].value ><br>threshold=0.2418053299188614  |
| node_238: feature_name=cg23485307 | feature_id[221].value ><br>threshold=0.14884746074676514  |
| node_242: feature_name=cg04873169 | feature_id[4696].value ><br>threshold=0.6058756709098816  |
| node_244: feature_name=cg17009731 | feature_id[3218].value ><br>threshold=0.6602252125740051  |
| node_246: feature_name=cg18253910 | feature_id[4458].value ><br>threshold=0.6904322504997253  |
| node_250: feature_name=cg04774476 | feature_id[1257].value <=<br>threshold=0.5675267577171326 |
| node_251: feature_name=cg08276755 | feature_id[769].value <=<br>threshold=0.5270942002534866  |
| node_252: feature_name=cg09230938 | feature_id[163].value <=<br>threshold=0.465945765376091   |
| Class: myositis ossificans (MO)   |                                                           |
|                                   |                                                           |
| Rules_45                          | passed counts:7                                           |
| node_0: feature_name=cg11915444   | feature_id[2002].value ><br>threshold=0.3402601182460785  |
| node_10: feature_name=cg26016985  | feature_id[4407].value ><br>threshold=0.6493876278400421  |
| node_16: feature_name=cg23157618  | feature_id[5511].value ><br>threshold=0.5759606957435608  |
| node_20: feature_name=cg10480329  | feature_id[1439].value ><br>threshold=0.5518321692943573  |
| node_48: feature_name=cg17843418  | feature_id[4868].value ><br>threshold=0.34969255328178406 |
| node_52: feature_name=cg24407065  | feature_id[4522].value ><br>threshold=0.5364363789558411  |
| node_56: feature_name=cg07281938  | feature_id[249].value ><br>threshold=0.7506992518901825   |
| node_78: feature_name=cg21759907  | feature_id[1650].value ><br>threshold=0.46823520958423615 |
| node_98: feature_name=cg10886334  | feature_id[3975].value ><br>threshold=0.43698127567768097 |
| node_102: feature_name=cg09373983 | feature_id[5025].value ><br>threshold=0.5575815737247467  |
| node_106: feature_name=cg12948116 | feature_id[5360].value <=<br>threshold=0.5658791363239288 |

|                                   |                                                           |
|-----------------------------------|-----------------------------------------------------------|
| node_107: feature_name=cg21906519 | feature_id[5251].value ><br>threshold=0.6089984774589539  |
| node_111: feature_name=cg17537493 | feature_id[4217].value ><br>threshold=0.5825372636318207  |
| node_117: feature_name=cg15720017 | feature_id[4443].value ><br>threshold=0.7009969055652618  |
| node_119: feature_name=cg06038180 | feature_id[3480].value ><br>threshold=0.4583848565816879  |
| node_121: feature_name=cg08619651 | feature_id[4882].value <=<br>threshold=0.2105495035648346 |
| node_122: feature_name=cg01014262 | feature_id[1911].value <=<br>threshold=0.5327437818050385 |
| node_123: feature_name=cg16863382 | feature_id[2922].value ><br>threshold=0.7200668156147003  |
| node_133: feature_name=cg06989443 | feature_id[2327].value <=<br>threshold=0.6579365730285645 |
| node_134: feature_name=cg07344990 | feature_id[2398].value ><br>threshold=0.5562876164913177  |
| node_138: feature_name=cg02966841 | feature_id[2199].value ><br>threshold=0.7744501233100891  |
| node_204: feature_name=cg12120430 | feature_id[3727].value ><br>threshold=0.5775820016860962  |
| node_206: feature_name=cg18386876 | feature_id[4066].value ><br>threshold=0.6847257018089294  |
| node_208: feature_name=cg02053092 | feature_id[3610].value ><br>threshold=0.39507485926151276 |
| node_210: feature_name=cg10298992 | feature_id[3603].value ><br>threshold=0.5707973837852478  |
| node_228: feature_name=cg03840920 | feature_id[4524].value ><br>threshold=0.5365143716335297  |
| node_234: feature_name=cg25364972 | feature_id[1792].value ><br>threshold=0.2418053299188614  |
| node_238: feature_name=cg23485307 | feature_id[221].value ><br>threshold=0.14884746074676514  |
| node_242: feature_name=cg04873169 | feature_id[4696].value ><br>threshold=0.6058756709098816  |
| node_244: feature_name=cg17009731 | feature_id[3218].value ><br>threshold=0.6602252125740051  |
| node_246: feature_name=cg18253910 | feature_id[4458].value ><br>threshold=0.6904322504997253  |
| node_250: feature_name=cg04774476 | feature_id[1257].value ><br>threshold=0.5675267577171326  |
| node_256: feature_name=cg19259111 | feature_id[63].value ><br>threshold=0.40771469473838806   |

|                                   |                                                            |
|-----------------------------------|------------------------------------------------------------|
| node_264: feature_name=cg21483216 | feature_id[5253].value ><br>threshold=0.6332719326019287   |
| node_266: feature_name=cg04026354 | feature_id[3502].value <=<br>threshold=0.42332448065280914 |
| node_267: feature_name=cg11444072 | feature_id[116].value ><br>threshold=0.4940422773361206    |
| node_273: feature_name=cg08571020 | feature_id[381].value ><br>threshold=0.4616774618625641    |
| node_275: feature_name=cg08331427 | feature_id[2081].value ><br>threshold=0.5443233847618103   |
| node_281: feature_name=cg00216961 | feature_id[945].value <=<br>threshold=0.4166988283395767   |
| node_282: feature_name=cg04716580 | feature_id[1390].value ><br>threshold=0.4204266667366028   |
| node_286: feature_name=cg07891483 | feature_id[1877].value ><br>threshold=0.829958975315094    |
| node_288: feature_name=cg01475325 | feature_id[3969].value <=<br>threshold=0.45323844254016876 |
| node_289: feature_name=cg21925748 | feature_id[5244].value <=<br>threshold=0.7208462655544281  |
| Class: sarcoma (SARC)             |                                                            |
|                                   |                                                            |
| Rules_46                          | passed counts:7                                            |
| node_0: feature_name=cg11915444   | feature_id[2002].value ><br>threshold=0.3402601182460785   |
| node_10: feature_name=cg26016985  | feature_id[4407].value ><br>threshold=0.6493876278400421   |
| node_16: feature_name=cg23157618  | feature_id[5511].value ><br>threshold=0.5759606957435608   |
| node_20: feature_name=cg10480329  | feature_id[1439].value ><br>threshold=0.5518321692943573   |
| node_48: feature_name=cg17843418  | feature_id[4868].value ><br>threshold=0.34969255328178406  |
| node_52: feature_name=cg24407065  | feature_id[4522].value ><br>threshold=0.5364363789558411   |
| node_56: feature_name=cg07281938  | feature_id[249].value ><br>threshold=0.7506992518901825    |
| node_78: feature_name=cg21759907  | feature_id[1650].value ><br>threshold=0.46823520958423615  |
| node_98: feature_name=cg10886334  | feature_id[3975].value ><br>threshold=0.43698127567768097  |
| node_102: feature_name=cg09373983 | feature_id[5025].value ><br>threshold=0.5575815737247467   |

|                                   |                                                           |
|-----------------------------------|-----------------------------------------------------------|
| node_106: feature_name=cg12948116 | feature_id[5360].value <=<br>threshold=0.5658791363239288 |
| node_107: feature_name=cg21906519 | feature_id[5251].value ><br>threshold=0.6089984774589539  |
| node_111: feature_name=cg17537493 | feature_id[4217].value ><br>threshold=0.5825372636318207  |
| node_117: feature_name=cg15720017 | feature_id[4443].value ><br>threshold=0.7009969055652618  |
| node_119: feature_name=cg06038180 | feature_id[3480].value ><br>threshold=0.4583848565816879  |
| node_121: feature_name=cg08619651 | feature_id[4882].value <=<br>threshold=0.2105495035648346 |
| node_122: feature_name=cg01014262 | feature_id[1911].value <=<br>threshold=0.5327437818050385 |
| node_123: feature_name=cg16863382 | feature_id[2922].value ><br>threshold=0.7200668156147003  |
| node_133: feature_name=cg06989443 | feature_id[2327].value <=<br>threshold=0.6579365730285645 |
| node_134: feature_name=cg07344990 | feature_id[2398].value ><br>threshold=0.5562876164913177  |
| node_138: feature_name=cg02966841 | feature_id[2199].value ><br>threshold=0.7744501233100891  |
| node_204: feature_name=cg12120430 | feature_id[3727].value ><br>threshold=0.5775820016860962  |
| node_206: feature_name=cg18386876 | feature_id[4066].value ><br>threshold=0.6847257018089294  |
| node_208: feature_name=cg02053092 | feature_id[3610].value ><br>threshold=0.39507485926151276 |
| node_210: feature_name=cg10298992 | feature_id[3603].value ><br>threshold=0.5707973837852478  |
| node_228: feature_name=cg03840920 | feature_id[4524].value ><br>threshold=0.5365143716335297  |
| node_234: feature_name=cg25364972 | feature_id[1792].value ><br>threshold=0.2418053299188614  |
| node_238: feature_name=cg23485307 | feature_id[221].value ><br>threshold=0.14884746074676514  |
| node_242: feature_name=cg04873169 | feature_id[4696].value ><br>threshold=0.6058756709098816  |
| node_244: feature_name=cg17009731 | feature_id[3218].value ><br>threshold=0.6602252125740051  |
| node_246: feature_name=cg18253910 | feature_id[4458].value ><br>threshold=0.6904322504997253  |
| node_250: feature_name=cg04774476 | feature_id[1257].value ><br>threshold=0.5675267577171326  |

|                                            |                                                            |
|--------------------------------------------|------------------------------------------------------------|
| node_256: feature_name=cg19259111          | feature_id[63].value ><br>threshold=0.40771469473838806    |
| node_264: feature_name=cg21483216          | feature_id[5253].value ><br>threshold=0.6332719326019287   |
| node_266: feature_name=cg04026354          | feature_id[3502].value <=<br>threshold=0.42332448065280914 |
| node_267: feature_name=cg11444072          | feature_id[116].value ><br>threshold=0.4940422773361206    |
| node_273: feature_name=cg08571020          | feature_id[381].value ><br>threshold=0.4616774618625641    |
| node_275: feature_name=cg08331427          | feature_id[2081].value ><br>threshold=0.5443233847618103   |
| node_281: feature_name=cg00216961          | feature_id[945].value <=<br>threshold=0.4166988283395767   |
| node_282: feature_name=cg04716580          | feature_id[1390].value ><br>threshold=0.4204266667366028   |
| node_286: feature_name=cg07891483          | feature_id[1877].value <=<br>threshold=0.829958975315094   |
| Class: plexiform neurofibroma (NFB (PLEX)) |                                                            |
|                                            |                                                            |
| Rules_47                                   | passed counts:7                                            |
| node_0: feature_name=cg11915444            | feature_id[2002].value ><br>threshold=0.3402601182460785   |
| node_10: feature_name=cg26016985           | feature_id[4407].value ><br>threshold=0.6493876278400421   |
| node_16: feature_name=cg23157618           | feature_id[5511].value ><br>threshold=0.5759606957435608   |
| node_20: feature_name=cg10480329           | feature_id[1439].value ><br>threshold=0.5518321692943573   |
| node_48: feature_name=cg17843418           | feature_id[4868].value ><br>threshold=0.34969255328178406  |
| node_52: feature_name=cg24407065           | feature_id[4522].value ><br>threshold=0.5364363789558411   |
| node_56: feature_name=cg07281938           | feature_id[249].value ><br>threshold=0.7506992518901825    |
| node_78: feature_name=cg21759907           | feature_id[1650].value ><br>threshold=0.46823520958423615  |
| node_98: feature_name=cg10886334           | feature_id[3975].value ><br>threshold=0.43698127567768097  |
| node_102: feature_name=cg09373983          | feature_id[5025].value ><br>threshold=0.5575815737247467   |
| node_106: feature_name=cg12948116          | feature_id[5360].value <=<br>threshold=0.5658791363239288  |

|                                   |                                                           |
|-----------------------------------|-----------------------------------------------------------|
| node_107: feature_name=cg21906519 | feature_id[5251].value ><br>threshold=0.6089984774589539  |
| node_111: feature_name=cg17537493 | feature_id[4217].value ><br>threshold=0.5825372636318207  |
| node_117: feature_name=cg15720017 | feature_id[4443].value ><br>threshold=0.7009969055652618  |
| node_119: feature_name=cg06038180 | feature_id[3480].value ><br>threshold=0.4583848565816879  |
| node_121: feature_name=cg08619651 | feature_id[4882].value <=<br>threshold=0.2105495035648346 |
| node_122: feature_name=cg01014262 | feature_id[1911].value <=<br>threshold=0.5327437818050385 |
| node_123: feature_name=cg16863382 | feature_id[2922].value ><br>threshold=0.7200668156147003  |
| node_133: feature_name=cg06989443 | feature_id[2327].value <=<br>threshold=0.6579365730285645 |
| node_134: feature_name=cg07344990 | feature_id[2398].value ><br>threshold=0.5562876164913177  |
| node_138: feature_name=cg02966841 | feature_id[2199].value ><br>threshold=0.7744501233100891  |
| node_204: feature_name=cg12120430 | feature_id[3727].value ><br>threshold=0.5775820016860962  |
| node_206: feature_name=cg18386876 | feature_id[4066].value ><br>threshold=0.6847257018089294  |
| node_208: feature_name=cg02053092 | feature_id[3610].value ><br>threshold=0.39507485926151276 |
| node_210: feature_name=cg10298992 | feature_id[3603].value ><br>threshold=0.5707973837852478  |
| node_228: feature_name=cg03840920 | feature_id[4524].value ><br>threshold=0.5365143716335297  |
| node_234: feature_name=cg25364972 | feature_id[1792].value ><br>threshold=0.2418053299188614  |
| node_238: feature_name=cg23485307 | feature_id[221].value ><br>threshold=0.14884746074676514  |
| node_242: feature_name=cg04873169 | feature_id[4696].value ><br>threshold=0.6058756709098816  |
| node_244: feature_name=cg17009731 | feature_id[3218].value ><br>threshold=0.6602252125740051  |
| node_246: feature_name=cg18253910 | feature_id[4458].value ><br>threshold=0.6904322504997253  |
| node_250: feature_name=cg04774476 | feature_id[1257].value ><br>threshold=0.5675267577171326  |
| node_256: feature_name=cg19259111 | feature_id[63].value ><br>threshold=0.40771469473838806   |



|                                                 |                                                            |
|-------------------------------------------------|------------------------------------------------------------|
| node_264: feature_name=cg21483216               | feature_id[5253].value ><br>threshold=0.6332719326019287   |
| node_266: feature_name=cg04026354               | feature_id[3502].value <=<br>threshold=0.42332448065280914 |
| node_267: feature_name=cg11444072               | feature_id[116].value ><br>threshold=0.4940422773361206    |
| node_273: feature_name=cg08571020               | feature_id[381].value ><br>threshold=0.4616774618625641    |
| node_275: feature_name=cg08331427               | feature_id[2081].value ><br>threshold=0.5443233847618103   |
| node_281: feature_name=cg00216961               | feature_id[945].value <=<br>threshold=0.4166988283395767   |
| node_282: feature_name=cg04716580               | feature_id[1390].value <=<br>threshold=0.4204266667366028  |
| node_283: feature_name=cg09180239               | feature_id[2620].value ><br>threshold=0.7707420885562897   |
| Class: sclerosing epithelioid fibrosarcoma(SEF) |                                                            |
| Rules_48                                        | passed counts:7                                            |
| node_0: feature_name=cg11915444                 | feature_id[2002].value ><br>threshold=0.3402601182460785   |
| node_10: feature_name=cg26016985                | feature_id[4407].value ><br>threshold=0.6493876278400421   |
| node_16: feature_name=cg23157618                | feature_id[5511].value ><br>threshold=0.5759606957435608   |
| node_20: feature_name=cg10480329                | feature_id[1439].value ><br>threshold=0.5518321692943573   |
| node_48: feature_name=cg17843418                | feature_id[4868].value ><br>threshold=0.34969255328178406  |
| node_52: feature_name=cg24407065                | feature_id[4522].value ><br>threshold=0.5364363789558411   |
| node_56: feature_name=cg07281938                | feature_id[249].value ><br>threshold=0.7506992518901825    |
| node_78: feature_name=cg21759907                | feature_id[1650].value ><br>threshold=0.46823520958423615  |
| node_98: feature_name=cg10886334                | feature_id[3975].value ><br>threshold=0.43698127567768097  |
| node_102: feature_name=cg09373983               | feature_id[5025].value ><br>threshold=0.5575815737247467   |
| node_106: feature_name=cg12948116               | feature_id[5360].value <=<br>threshold=0.5658791363239288  |
| node_107: feature_name=cg21906519               | feature_id[5251].value ><br>threshold=0.6089984774589539   |

|                                   |                                                           |
|-----------------------------------|-----------------------------------------------------------|
| node_111: feature_name=cg17537493 | feature_id[4217].value ><br>threshold=0.5825372636318207  |
| node_117: feature_name=cg15720017 | feature_id[4443].value ><br>threshold=0.7009969055652618  |
| node_119: feature_name=cg06038180 | feature_id[3480].value ><br>threshold=0.4583848565816879  |
| node_121: feature_name=cg08619651 | feature_id[4882].value <=<br>threshold=0.2105495035648346 |
| node_122: feature_name=cg01014262 | feature_id[1911].value <=<br>threshold=0.5327437818050385 |
| node_123: feature_name=cg16863382 | feature_id[2922].value ><br>threshold=0.7200668156147003  |
| node_133: feature_name=cg06989443 | feature_id[2327].value <=<br>threshold=0.6579365730285645 |
| node_134: feature_name=cg07344990 | feature_id[2398].value ><br>threshold=0.5562876164913177  |
| node_138: feature_name=cg02966841 | feature_id[2199].value ><br>threshold=0.7744501233100891  |
| node_204: feature_name=cg12120430 | feature_id[3727].value ><br>threshold=0.5775820016860962  |
| node_206: feature_name=cg18386876 | feature_id[4066].value ><br>threshold=0.6847257018089294  |
| node_208: feature_name=cg02053092 | feature_id[3610].value ><br>threshold=0.39507485926151276 |
| node_210: feature_name=cg10298992 | feature_id[3603].value ><br>threshold=0.5707973837852478  |
| node_228: feature_name=cg03840920 | feature_id[4524].value ><br>threshold=0.5365143716335297  |
| node_234: feature_name=cg25364972 | feature_id[1792].value ><br>threshold=0.2418053299188614  |
| node_238: feature_name=cg23485307 | feature_id[221].value ><br>threshold=0.14884746074676514  |
| node_242: feature_name=cg04873169 | feature_id[4696].value ><br>threshold=0.6058756709098816  |
| node_244: feature_name=cg17009731 | feature_id[3218].value ><br>threshold=0.6602252125740051  |
| node_246: feature_name=cg18253910 | feature_id[4458].value ><br>threshold=0.6904322504997253  |
| node_250: feature_name=cg04774476 | feature_id[1257].value ><br>threshold=0.5675267577171326  |
| node_256: feature_name=cg19259111 | feature_id[63].value ><br>threshold=0.40771469473838806   |
| node_264: feature_name=cg21483216 | feature_id[5253].value ><br>threshold=0.6332719326019287  |

|                                               |                                                            |
|-----------------------------------------------|------------------------------------------------------------|
| node_266: feature_name=cg04026354             | feature_id[3502].value <=<br>threshold=0.42332448065280914 |
| node_267: feature_name=cg11444072             | feature_id[116].value ><br>threshold=0.4940422773361206    |
| node_273: feature_name=cg08571020             | feature_id[381].value <=<br>threshold=0.4616774618625641   |
| Class: clear cell sarcoma of soft parts (CCS) |                                                            |
| Rules_49                                      | passed counts:7                                            |
| node_0: feature_name=cg11915444               | feature_id[2002].value ><br>threshold=0.3402601182460785   |
| node_10: feature_name=cg26016985              | feature_id[4407].value ><br>threshold=0.6493876278400421   |
| node_16: feature_name=cg23157618              | feature_id[5511].value ><br>threshold=0.5759606957435608   |
| node_20: feature_name=cg10480329              | feature_id[1439].value ><br>threshold=0.5518321692943573   |
| node_48: feature_name=cg17843418              | feature_id[4868].value ><br>threshold=0.34969255328178406  |
| node_52: feature_name=cg24407065              | feature_id[4522].value ><br>threshold=0.5364363789558411   |
| node_56: feature_name=cg07281938              | feature_id[249].value ><br>threshold=0.7506992518901825    |
| node_78: feature_name=cg21759907              | feature_id[1650].value ><br>threshold=0.46823520958423615  |
| node_98: feature_name=cg10886334              | feature_id[3975].value ><br>threshold=0.43698127567768097  |
| node_102: feature_name=cg09373983             | feature_id[5025].value ><br>threshold=0.5575815737247467   |
| node_106: feature_name=cg12948116             | feature_id[5360].value <=<br>threshold=0.5658791363239288  |
| node_107: feature_name=cg21906519             | feature_id[5251].value ><br>threshold=0.6089984774589539   |
| node_111: feature_name=cg17537493             | feature_id[4217].value ><br>threshold=0.5825372636318207   |
| node_117: feature_name=cg15720017             | feature_id[4443].value ><br>threshold=0.7009969055652618   |
| node_119: feature_name=cg06038180             | feature_id[3480].value ><br>threshold=0.4583848565816879   |
| node_121: feature_name=cg08619651             | feature_id[4882].value <=<br>threshold=0.2105495035648346  |
| node_122: feature_name=cg01014262             | feature_id[1911].value <=<br>threshold=0.5327437818050385  |

|                                   |                                                            |
|-----------------------------------|------------------------------------------------------------|
| node_123: feature_name=cg16863382 | feature_id[2922].value ><br>threshold=0.7200668156147003   |
| node_133: feature_name=cg06989443 | feature_id[2327].value <=<br>threshold=0.6579365730285645  |
| node_134: feature_name=cg07344990 | feature_id[2398].value ><br>threshold=0.5562876164913177   |
| node_138: feature_name=cg02966841 | feature_id[2199].value <=<br>threshold=0.7744501233100891  |
| node_139: feature_name=cg06989253 | feature_id[194].value <=<br>threshold=0.7899391353130341   |
| node_140: feature_name=cg24617568 | feature_id[3282].value <=<br>threshold=0.26932457089424133 |
| node_141: feature_name=cg12614090 | feature_id[2765].value ><br>threshold=0.1813211366534233   |
| Class: melanoma (MEL)             |                                                            |
|                                   |                                                            |
| Rules_50                          | passed counts:7                                            |
| node_0: feature_name=cg11915444   | feature_id[2002].value ><br>threshold=0.3402601182460785   |
| node_10: feature_name=cg26016985  | feature_id[4407].value ><br>threshold=0.6493876278400421   |
| node_16: feature_name=cg23157618  | feature_id[5511].value ><br>threshold=0.5759606957435608   |
| node_20: feature_name=cg10480329  | feature_id[1439].value ><br>threshold=0.5518321692943573   |
| node_48: feature_name=cg17843418  | feature_id[4868].value ><br>threshold=0.34969255328178406  |
| node_52: feature_name=cg24407065  | feature_id[4522].value ><br>threshold=0.5364363789558411   |
| node_56: feature_name=cg07281938  | feature_id[249].value ><br>threshold=0.7506992518901825    |
| node_78: feature_name=cg21759907  | feature_id[1650].value ><br>threshold=0.46823520958423615  |
| node_98: feature_name=cg10886334  | feature_id[3975].value ><br>threshold=0.43698127567768097  |
| node_102: feature_name=cg09373983 | feature_id[5025].value ><br>threshold=0.5575815737247467   |
| node_106: feature_name=cg12948116 | feature_id[5360].value <=<br>threshold=0.5658791363239288  |
| node_107: feature_name=cg21906519 | feature_id[5251].value ><br>threshold=0.6089984774589539   |
| node_111: feature_name=cg17537493 | feature_id[4217].value ><br>threshold=0.5825372636318207   |

|                                                       |                                                            |
|-------------------------------------------------------|------------------------------------------------------------|
| node_117: feature_name=cg15720017                     | feature_id[4443].value ><br>threshold=0.7009969055652618   |
| node_119: feature_name=cg06038180                     | feature_id[3480].value ><br>threshold=0.4583848565816879   |
| node_121: feature_name=cg08619651                     | feature_id[4882].value <=<br>threshold=0.2105495035648346  |
| node_122: feature_name=cg01014262                     | feature_id[1911].value <=<br>threshold=0.5327437818050385  |
| node_123: feature_name=cg16863382                     | feature_id[2922].value ><br>threshold=0.7200668156147003   |
| node_133: feature_name=cg06989443                     | feature_id[2327].value <=<br>threshold=0.6579365730285645  |
| node_134: feature_name=cg07344990                     | feature_id[2398].value ><br>threshold=0.5562876164913177   |
| node_138: feature_name=cg02966841                     | feature_id[2199].value <=<br>threshold=0.7744501233100891  |
| node_139: feature_name=cg06989253                     | feature_id[194].value <=<br>threshold=0.7899391353130341   |
| node_140: feature_name=cg24617568                     | feature_id[3282].value <=<br>threshold=0.26932457089424133 |
| node_141: feature_name=cg12614090                     | feature_id[2765].value <=<br>threshold=0.1813211366534233  |
| node_142: feature_name=cg10917602                     | feature_id[4685].value ><br>threshold=0.5744736790657043   |
| Class: high-grade conventional osteosarcoma (OS (HG)) |                                                            |
|                                                       |                                                            |
| Rules_51                                              | passed counts:7                                            |
| node_0: feature_name=cg11915444                       | feature_id[2002].value ><br>threshold=0.3402601182460785   |
| node_10: feature_name=cg26016985                      | feature_id[4407].value ><br>threshold=0.6493876278400421   |
| node_16: feature_name=cg23157618                      | feature_id[5511].value ><br>threshold=0.5759606957435608   |
| node_20: feature_name=cg10480329                      | feature_id[1439].value ><br>threshold=0.5518321692943573   |
| node_48: feature_name=cg17843418                      | feature_id[4868].value ><br>threshold=0.34969255328178406  |
| node_52: feature_name=cg24407065                      | feature_id[4522].value ><br>threshold=0.5364363789558411   |
| node_56: feature_name=cg07281938                      | feature_id[249].value ><br>threshold=0.7506992518901825    |

|                                   |                                                            |
|-----------------------------------|------------------------------------------------------------|
| node_78: feature_name=cg21759907  | feature_id[1650].value <=<br>threshold=0.46823520958423615 |
| node_79: feature_name=cg25476129  | feature_id[2302].value <=<br>threshold=0.1687404215335846  |
| node_80: feature_name=cg26362368  | feature_id[414].value ><br>threshold=0.834072083234787     |
| Class: leiomyoma (LMO)            |                                                            |
| Rules_52                          | passed counts:6                                            |
| node_0: feature_name=cg11915444   | feature_id[2002].value ><br>threshold=0.3402601182460785   |
| node_10: feature_name=cg26016985  | feature_id[4407].value ><br>threshold=0.6493876278400421   |
| node_16: feature_name=cg23157618  | feature_id[5511].value ><br>threshold=0.5759606957435608   |
| node_20: feature_name=cg10480329  | feature_id[1439].value ><br>threshold=0.5518321692943573   |
| node_48: feature_name=cg17843418  | feature_id[4868].value ><br>threshold=0.34969255328178406  |
| node_52: feature_name=cg24407065  | feature_id[4522].value ><br>threshold=0.5364363789558411   |
| node_56: feature_name=cg07281938  | feature_id[249].value ><br>threshold=0.7506992518901825    |
| node_78: feature_name=cg21759907  | feature_id[1650].value ><br>threshold=0.46823520958423615  |
| node_98: feature_name=cg10886334  | feature_id[3975].value ><br>threshold=0.43698127567768097  |
| node_102: feature_name=cg09373983 | feature_id[5025].value ><br>threshold=0.5575815737247467   |
| node_106: feature_name=cg12948116 | feature_id[5360].value <=<br>threshold=0.5658791363239288  |
| node_107: feature_name=cg21906519 | feature_id[5251].value ><br>threshold=0.6089984774589539   |
| node_111: feature_name=cg17537493 | feature_id[4217].value ><br>threshold=0.5825372636318207   |
| node_117: feature_name=cg15720017 | feature_id[4443].value ><br>threshold=0.7009969055652618   |
| node_119: feature_name=cg06038180 | feature_id[3480].value ><br>threshold=0.4583848565816879   |
| node_121: feature_name=cg08619651 | feature_id[4882].value <=<br>threshold=0.2105495035648346  |
| node_122: feature_name=cg01014262 | feature_id[1911].value <=<br>threshold=0.5327437818050385  |

|                                   |                                                            |
|-----------------------------------|------------------------------------------------------------|
| node_123: feature_name=cg16863382 | feature_id[2922].value ><br>threshold=0.7200668156147003   |
| node_133: feature_name=cg06989443 | feature_id[2327].value <=<br>threshold=0.6579365730285645  |
| node_134: feature_name=cg07344990 | feature_id[2398].value ><br>threshold=0.5562876164913177   |
| node_138: feature_name=cg02966841 | feature_id[2199].value ><br>threshold=0.7744501233100891   |
| node_204: feature_name=cg12120430 | feature_id[3727].value ><br>threshold=0.5775820016860962   |
| node_206: feature_name=cg18386876 | feature_id[4066].value ><br>threshold=0.6847257018089294   |
| node_208: feature_name=cg02053092 | feature_id[3610].value ><br>threshold=0.39507485926151276  |
| node_210: feature_name=cg10298992 | feature_id[3603].value ><br>threshold=0.5707973837852478   |
| node_228: feature_name=cg03840920 | feature_id[4524].value ><br>threshold=0.5365143716335297   |
| node_234: feature_name=cg25364972 | feature_id[1792].value ><br>threshold=0.2418053299188614   |
| node_238: feature_name=cg23485307 | feature_id[221].value ><br>threshold=0.14884746074676514   |
| node_242: feature_name=cg04873169 | feature_id[4696].value ><br>threshold=0.6058756709098816   |
| node_244: feature_name=cg17009731 | feature_id[3218].value ><br>threshold=0.6602252125740051   |
| node_246: feature_name=cg18253910 | feature_id[4458].value ><br>threshold=0.6904322504997253   |
| node_250: feature_name=cg04774476 | feature_id[1257].value ><br>threshold=0.5675267577171326   |
| node_256: feature_name=cg19259111 | feature_id[63].value ><br>threshold=0.40771469473838806    |
| node_264: feature_name=cg21483216 | feature_id[5253].value ><br>threshold=0.6332719326019287   |
| node_266: feature_name=cg04026354 | feature_id[3502].value <=<br>threshold=0.42332448065280914 |
| node_267: feature_name=cg11444072 | feature_id[116].value ><br>threshold=0.4940422773361206    |
| node_273: feature_name=cg08571020 | feature_id[381].value ><br>threshold=0.4616774618625641    |
| node_275: feature_name=cg08331427 | feature_id[2081].value ><br>threshold=0.5443233847618103   |
| node_281: feature_name=cg00216961 | feature_id[945].value <=<br>threshold=0.4166988283395767   |

|                                               |                                                            |
|-----------------------------------------------|------------------------------------------------------------|
| node_282: feature_name=cg04716580             | feature_id[1390].value ><br>threshold=0.4204266667366028   |
| node_286: feature_name=cg07891483             | feature_id[1877].value ><br>threshold=0.829958975315094    |
| node_288: feature_name=cg01475325             | feature_id[3969].value ><br>threshold=0.45323844254016876  |
| node_292: feature_name=cg19702397             | feature_id[2066].value ><br>threshold=0.3536848723888397   |
| node_294: feature_name=cg21936959             | feature_id[595].value ><br>threshold=0.5567200481891632    |
| node_308: feature_name=cg18645642             | feature_id[262].value ><br>threshold=0.42608243227005005   |
| node_310: feature_name=cg27351239             | feature_id[1874].value ><br>threshold=0.6790103316307068   |
| node_330: feature_name=cg18252102             | feature_id[1205].value <=<br>threshold=0.5534502267837524  |
| Class: undifferentiated sarcoma (USARC)       |                                                            |
| Rules_53                                      | passed counts:6                                            |
| node_0: feature_name=cg11915444               | feature_id[2002].value ><br>threshold=0.3402601182460785   |
| node_10: feature_name=cg26016985              | feature_id[4407].value ><br>threshold=0.6493876278400421   |
| node_16: feature_name=cg23157618              | feature_id[5511].value ><br>threshold=0.5759606957435608   |
| node_20: feature_name=cg10480329              | feature_id[1439].value ><br>threshold=0.5518321692943573   |
| node_48: feature_name=cg17843418              | feature_id[4868].value ><br>threshold=0.34969255328178406  |
| node_52: feature_name=cg24407065              | feature_id[4522].value ><br>threshold=0.5364363789558411   |
| node_56: feature_name=cg07281938              | feature_id[249].value <=<br>threshold=0.7506992518901825   |
| node_57: feature_name=cg21189849              | feature_id[1261].value ><br>threshold=0.7545044124126434   |
| node_63: feature_name=cg18048309              | feature_id[2794].value <=<br>threshold=0.36701037734746933 |
| Class: mesenchymal chondrosarcoma (CSA (MES)) |                                                            |
| Rules_54                                      | passed counts:6                                            |
| node_0: feature_name=cg11915444               | feature_id[2002].value ><br>threshold=0.3402601182460785   |



|                                   |                                                            |
|-----------------------------------|------------------------------------------------------------|
| node_10: feature_name=cg26016985  | feature_id[4407].value ><br>threshold=0.6493876278400421   |
| node_16: feature_name=cg23157618  | feature_id[5511].value ><br>threshold=0.5759606957435608   |
| node_20: feature_name=cg10480329  | feature_id[1439].value <=<br>threshold=0.5518321692943573  |
| node_21: feature_name=cg25510609  | feature_id[149].value <=<br>threshold=0.08151235431432724  |
| node_22: feature_name=cg23850277  | feature_id[2159].value <=<br>threshold=0.5682950615882874  |
| node_23: feature_name=cg01259126  | feature_id[3146].value <=<br>threshold=0.34355829656124115 |
| Class: osteoblastoma (OB)         |                                                            |
|                                   |                                                            |
| Rules_55                          | passed counts:5                                            |
| node_0: feature_name=cg11915444   | feature_id[2002].value ><br>threshold=0.3402601182460785   |
| node_10: feature_name=cg26016985  | feature_id[4407].value ><br>threshold=0.6493876278400421   |
| node_16: feature_name=cg23157618  | feature_id[5511].value ><br>threshold=0.5759606957435608   |
| node_20: feature_name=cg10480329  | feature_id[1439].value ><br>threshold=0.5518321692943573   |
| node_48: feature_name=cg17843418  | feature_id[4868].value ><br>threshold=0.34969255328178406  |
| node_52: feature_name=cg24407065  | feature_id[4522].value ><br>threshold=0.5364363789558411   |
| node_56: feature_name=cg07281938  | feature_id[249].value ><br>threshold=0.7506992518901825    |
| node_78: feature_name=cg21759907  | feature_id[1650].value ><br>threshold=0.46823520958423615  |
| node_98: feature_name=cg10886334  | feature_id[3975].value ><br>threshold=0.43698127567768097  |
| node_102: feature_name=cg09373983 | feature_id[5025].value ><br>threshold=0.5575815737247467   |
| node_106: feature_name=cg12948116 | feature_id[5360].value <=<br>threshold=0.5658791363239288  |
| node_107: feature_name=cg21906519 | feature_id[5251].value ><br>threshold=0.6089984774589539   |
| node_111: feature_name=cg17537493 | feature_id[4217].value ><br>threshold=0.5825372636318207   |
| node_117: feature_name=cg15720017 | feature_id[4443].value ><br>threshold=0.7009969055652618   |

|                                   |                                                           |
|-----------------------------------|-----------------------------------------------------------|
| node_119: feature_name=cg06038180 | feature_id[3480].value ><br>threshold=0.4583848565816879  |
| node_121: feature_name=cg08619651 | feature_id[4882].value <=<br>threshold=0.2105495035648346 |
| node_122: feature_name=cg01014262 | feature_id[1911].value <=<br>threshold=0.5327437818050385 |
| node_123: feature_name=cg16863382 | feature_id[2922].value ><br>threshold=0.7200668156147003  |
| node_133: feature_name=cg06989443 | feature_id[2327].value <=<br>threshold=0.6579365730285645 |
| node_134: feature_name=cg07344990 | feature_id[2398].value ><br>threshold=0.5562876164913177  |
| node_138: feature_name=cg02966841 | feature_id[2199].value ><br>threshold=0.7744501233100891  |
| node_204: feature_name=cg12120430 | feature_id[3727].value ><br>threshold=0.5775820016860962  |
| node_206: feature_name=cg18386876 | feature_id[4066].value ><br>threshold=0.6847257018089294  |
| node_208: feature_name=cg02053092 | feature_id[3610].value ><br>threshold=0.39507485926151276 |
| node_210: feature_name=cg10298992 | feature_id[3603].value ><br>threshold=0.5707973837852478  |
| node_228: feature_name=cg03840920 | feature_id[4524].value ><br>threshold=0.5365143716335297  |
| node_234: feature_name=cg25364972 | feature_id[1792].value ><br>threshold=0.2418053299188614  |
| node_238: feature_name=cg23485307 | feature_id[221].value ><br>threshold=0.14884746074676514  |
| node_242: feature_name=cg04873169 | feature_id[4696].value ><br>threshold=0.6058756709098816  |
| node_244: feature_name=cg17009731 | feature_id[3218].value ><br>threshold=0.6602252125740051  |
| node_246: feature_name=cg18253910 | feature_id[4458].value ><br>threshold=0.6904322504997253  |
| node_250: feature_name=cg04774476 | feature_id[1257].value ><br>threshold=0.5675267577171326  |
| node_256: feature_name=cg19259111 | feature_id[63].value ><br>threshold=0.40771469473838806   |
| node_264: feature_name=cg21483216 | feature_id[5253].value ><br>threshold=0.6332719326019287  |
| node_266: feature_name=cg04026354 | feature_id[3502].value ><br>threshold=0.42332448065280914 |
| node_336: feature_name=cg05824594 | feature_id[1431].value <=<br>threshold=0.629401296377182  |

|                                            |                                                        |
|--------------------------------------------|--------------------------------------------------------|
| node_337: feature_name=cg18475969          | feature_id[2117].value <= threshold=0.3116971254348755 |
| node_338: feature_name=cg19494591          | feature_id[2196].value <= threshold=0.7268106639385223 |
| Class: Langerhans cell histiocytosis (LCH) |                                                        |
| Rules_56                                   | passed counts:5                                        |
| node_0: feature_name=cg11915444            | feature_id[2002].value > threshold=0.3402601182460785  |
| node_10: feature_name=cg26016985           | feature_id[4407].value > threshold=0.6493876278400421  |
| node_16: feature_name=cg23157618           | feature_id[5511].value > threshold=0.5759606957435608  |
| node_20: feature_name=cg10480329           | feature_id[1439].value > threshold=0.5518321692943573  |
| node_48: feature_name=cg17843418           | feature_id[4868].value > threshold=0.34969255328178406 |
| node_52: feature_name=cg24407065           | feature_id[4522].value > threshold=0.5364363789558411  |
| node_56: feature_name=cg07281938           | feature_id[249].value > threshold=0.7506992518901825   |
| node_78: feature_name=cg21759907           | feature_id[1650].value > threshold=0.46823520958423615 |
| node_98: feature_name=cg10886334           | feature_id[3975].value > threshold=0.43698127567768097 |
| node_102: feature_name=cg09373983          | feature_id[5025].value > threshold=0.5575815737247467  |
| node_106: feature_name=cg12948116          | feature_id[5360].value <= threshold=0.5658791363239288 |
| node_107: feature_name=cg21906519          | feature_id[5251].value > threshold=0.6089984774589539  |
| node_111: feature_name=cg17537493          | feature_id[4217].value > threshold=0.5825372636318207  |
| node_117: feature_name=cg15720017          | feature_id[4443].value > threshold=0.7009969055652618  |
| node_119: feature_name=cg06038180          | feature_id[3480].value > threshold=0.4583848565816879  |
| node_121: feature_name=cg08619651          | feature_id[4882].value <= threshold=0.2105495035648346 |
| node_122: feature_name=cg01014262          | feature_id[1911].value <= threshold=0.5327437818050385 |
| node_123: feature_name=cg16863382          | feature_id[2922].value > threshold=0.7200668156147003  |

|                                   |                                                            |
|-----------------------------------|------------------------------------------------------------|
| node_133: feature_name=cg06989443 | feature_id[2327].value <=<br>threshold=0.6579365730285645  |
| node_134: feature_name=cg07344990 | feature_id[2398].value ><br>threshold=0.5562876164913177   |
| node_138: feature_name=cg02966841 | feature_id[2199].value ><br>threshold=0.7744501233100891   |
| node_204: feature_name=cg12120430 | feature_id[3727].value ><br>threshold=0.5775820016860962   |
| node_206: feature_name=cg18386876 | feature_id[4066].value ><br>threshold=0.6847257018089294   |
| node_208: feature_name=cg02053092 | feature_id[3610].value ><br>threshold=0.39507485926151276  |
| node_210: feature_name=cg10298992 | feature_id[3603].value ><br>threshold=0.5707973837852478   |
| node_228: feature_name=cg03840920 | feature_id[4524].value ><br>threshold=0.5365143716335297   |
| node_234: feature_name=cg25364972 | feature_id[1792].value ><br>threshold=0.2418053299188614   |
| node_238: feature_name=cg23485307 | feature_id[221].value ><br>threshold=0.14884746074676514   |
| node_242: feature_name=cg04873169 | feature_id[4696].value ><br>threshold=0.6058756709098816   |
| node_244: feature_name=cg17009731 | feature_id[3218].value ><br>threshold=0.6602252125740051   |
| node_246: feature_name=cg18253910 | feature_id[4458].value ><br>threshold=0.6904322504997253   |
| node_250: feature_name=cg04774476 | feature_id[1257].value ><br>threshold=0.5675267577171326   |
| node_256: feature_name=cg19259111 | feature_id[63].value ><br>threshold=0.40771469473838806    |
| node_264: feature_name=cg21483216 | feature_id[5253].value ><br>threshold=0.6332719326019287   |
| node_266: feature_name=cg04026354 | feature_id[3502].value <=<br>threshold=0.42332448065280914 |
| node_267: feature_name=cg11444072 | feature_id[116].value ><br>threshold=0.4940422773361206    |
| node_273: feature_name=cg08571020 | feature_id[381].value ><br>threshold=0.4616774618625641    |
| node_275: feature_name=cg08331427 | feature_id[2081].value ><br>threshold=0.5443233847618103   |
| node_281: feature_name=cg00216961 | feature_id[945].value <=<br>threshold=0.4166988283395767   |
| node_282: feature_name=cg04716580 | feature_id[1390].value ><br>threshold=0.4204266667366028   |

|                                   |                                                           |
|-----------------------------------|-----------------------------------------------------------|
| node_286: feature_name=cg07891483 | feature_id[1877].value ><br>threshold=0.829958975315094   |
| node_288: feature_name=cg01475325 | feature_id[3969].value ><br>threshold=0.45323844254016876 |
| node_292: feature_name=cg19702397 | feature_id[2066].value ><br>threshold=0.3536848723888397  |
| node_294: feature_name=cg21936959 | feature_id[595].value ><br>threshold=0.5567200481891632   |
| node_308: feature_name=cg18645642 | feature_id[262].value <=<br>threshold=0.42608243227005005 |
| Class: myositis proliferans (MP)  |                                                           |
| Rules_57                          | passed counts:5                                           |
| node_0: feature_name=cg11915444   | feature_id[2002].value ><br>threshold=0.3402601182460785  |
| node_10: feature_name=cg26016985  | feature_id[4407].value ><br>threshold=0.6493876278400421  |
| node_16: feature_name=cg23157618  | feature_id[5511].value ><br>threshold=0.5759606957435608  |
| node_20: feature_name=cg10480329  | feature_id[1439].value ><br>threshold=0.5518321692943573  |
| node_48: feature_name=cg17843418  | feature_id[4868].value ><br>threshold=0.34969255328178406 |
| node_52: feature_name=cg24407065  | feature_id[4522].value ><br>threshold=0.5364363789558411  |
| node_56: feature_name=cg07281938  | feature_id[249].value ><br>threshold=0.7506992518901825   |
| node_78: feature_name=cg21759907  | feature_id[1650].value ><br>threshold=0.46823520958423615 |
| node_98: feature_name=cg10886334  | feature_id[3975].value ><br>threshold=0.43698127567768097 |
| node_102: feature_name=cg09373983 | feature_id[5025].value ><br>threshold=0.5575815737247467  |
| node_106: feature_name=cg12948116 | feature_id[5360].value <=<br>threshold=0.5658791363239288 |
| node_107: feature_name=cg21906519 | feature_id[5251].value ><br>threshold=0.6089984774589539  |
| node_111: feature_name=cg17537493 | feature_id[4217].value ><br>threshold=0.5825372636318207  |
| node_117: feature_name=cg15720017 | feature_id[4443].value ><br>threshold=0.7009969055652618  |
| node_119: feature_name=cg06038180 | feature_id[3480].value ><br>threshold=0.4583848565816879  |

|                                   |                                                            |
|-----------------------------------|------------------------------------------------------------|
| node_121: feature_name=cg08619651 | feature_id[4882].value <=<br>threshold=0.2105495035648346  |
| node_122: feature_name=cg01014262 | feature_id[1911].value <=<br>threshold=0.5327437818050385  |
| node_123: feature_name=cg16863382 | feature_id[2922].value ><br>threshold=0.7200668156147003   |
| node_133: feature_name=cg06989443 | feature_id[2327].value <=<br>threshold=0.6579365730285645  |
| node_134: feature_name=cg07344990 | feature_id[2398].value ><br>threshold=0.5562876164913177   |
| node_138: feature_name=cg02966841 | feature_id[2199].value ><br>threshold=0.7744501233100891   |
| node_204: feature_name=cg12120430 | feature_id[3727].value ><br>threshold=0.5775820016860962   |
| node_206: feature_name=cg18386876 | feature_id[4066].value ><br>threshold=0.6847257018089294   |
| node_208: feature_name=cg02053092 | feature_id[3610].value ><br>threshold=0.39507485926151276  |
| node_210: feature_name=cg10298992 | feature_id[3603].value ><br>threshold=0.5707973837852478   |
| node_228: feature_name=cg03840920 | feature_id[4524].value ><br>threshold=0.5365143716335297   |
| node_234: feature_name=cg25364972 | feature_id[1792].value ><br>threshold=0.2418053299188614   |
| node_238: feature_name=cg23485307 | feature_id[221].value ><br>threshold=0.14884746074676514   |
| node_242: feature_name=cg04873169 | feature_id[4696].value ><br>threshold=0.6058756709098816   |
| node_244: feature_name=cg17009731 | feature_id[3218].value ><br>threshold=0.6602252125740051   |
| node_246: feature_name=cg18253910 | feature_id[4458].value ><br>threshold=0.6904322504997253   |
| node_250: feature_name=cg04774476 | feature_id[1257].value ><br>threshold=0.5675267577171326   |
| node_256: feature_name=cg19259111 | feature_id[63].value ><br>threshold=0.40771469473838806    |
| node_264: feature_name=cg21483216 | feature_id[5253].value ><br>threshold=0.6332719326019287   |
| node_266: feature_name=cg04026354 | feature_id[3502].value <=<br>threshold=0.42332448065280914 |
| node_267: feature_name=cg11444072 | feature_id[116].value ><br>threshold=0.4940422773361206    |
| node_273: feature_name=cg08571020 | feature_id[381].value ><br>threshold=0.4616774618625641    |

|                                              |                                                           |
|----------------------------------------------|-----------------------------------------------------------|
| node_275: feature_name=cg08331427            | feature_id[2081].value ><br>threshold=0.5443233847618103  |
| node_281: feature_name=cg00216961            | feature_id[945].value <=<br>threshold=0.4166988283395767  |
| node_282: feature_name=cg04716580            | feature_id[1390].value ><br>threshold=0.4204266667366028  |
| node_286: feature_name=cg07891483            | feature_id[1877].value ><br>threshold=0.829958975315094   |
| node_288: feature_name=cg01475325            | feature_id[3969].value ><br>threshold=0.45323844254016876 |
| node_292: feature_name=cg19702397            | feature_id[2066].value <=<br>threshold=0.3536848723888397 |
| Class: low-grade fibromyxoid sarcoma (LGFMS) |                                                           |
|                                              |                                                           |
| Rules_58                                     | passed counts:5                                           |
| node_0: feature_name=cg11915444              | feature_id[2002].value ><br>threshold=0.3402601182460785  |
| node_10: feature_name=cg26016985             | feature_id[4407].value ><br>threshold=0.6493876278400421  |
| node_16: feature_name=cg23157618             | feature_id[5511].value ><br>threshold=0.5759606957435608  |
| node_20: feature_name=cg10480329             | feature_id[1439].value ><br>threshold=0.5518321692943573  |
| node_48: feature_name=cg17843418             | feature_id[4868].value ><br>threshold=0.34969255328178406 |
| node_52: feature_name=cg24407065             | feature_id[4522].value ><br>threshold=0.5364363789558411  |
| node_56: feature_name=cg07281938             | feature_id[249].value ><br>threshold=0.7506992518901825   |
| node_78: feature_name=cg21759907             | feature_id[1650].value ><br>threshold=0.46823520958423615 |
| node_98: feature_name=cg10886334             | feature_id[3975].value ><br>threshold=0.43698127567768097 |
| node_102: feature_name=cg09373983            | feature_id[5025].value ><br>threshold=0.5575815737247467  |
| node_106: feature_name=cg12948116            | feature_id[5360].value <=<br>threshold=0.5658791363239288 |
| node_107: feature_name=cg21906519            | feature_id[5251].value ><br>threshold=0.6089984774589539  |
| node_111: feature_name=cg17537493            | feature_id[4217].value ><br>threshold=0.5825372636318207  |
| node_117: feature_name=cg15720017            | feature_id[4443].value ><br>threshold=0.7009969055652618  |

|                                   |                                                            |
|-----------------------------------|------------------------------------------------------------|
| node_119: feature_name=cg06038180 | feature_id[3480].value ><br>threshold=0.4583848565816879   |
| node_121: feature_name=cg08619651 | feature_id[4882].value <=<br>threshold=0.2105495035648346  |
| node_122: feature_name=cg01014262 | feature_id[1911].value <=<br>threshold=0.5327437818050385  |
| node_123: feature_name=cg16863382 | feature_id[2922].value ><br>threshold=0.7200668156147003   |
| node_133: feature_name=cg06989443 | feature_id[2327].value <=<br>threshold=0.6579365730285645  |
| node_134: feature_name=cg07344990 | feature_id[2398].value ><br>threshold=0.5562876164913177   |
| node_138: feature_name=cg02966841 | feature_id[2199].value ><br>threshold=0.7744501233100891   |
| node_204: feature_name=cg12120430 | feature_id[3727].value ><br>threshold=0.5775820016860962   |
| node_206: feature_name=cg18386876 | feature_id[4066].value ><br>threshold=0.6847257018089294   |
| node_208: feature_name=cg02053092 | feature_id[3610].value ><br>threshold=0.39507485926151276  |
| node_210: feature_name=cg10298992 | feature_id[3603].value ><br>threshold=0.5707973837852478   |
| node_228: feature_name=cg03840920 | feature_id[4524].value ><br>threshold=0.5365143716335297   |
| node_234: feature_name=cg25364972 | feature_id[1792].value ><br>threshold=0.2418053299188614   |
| node_238: feature_name=cg23485307 | feature_id[221].value ><br>threshold=0.14884746074676514   |
| node_242: feature_name=cg04873169 | feature_id[4696].value ><br>threshold=0.6058756709098816   |
| node_244: feature_name=cg17009731 | feature_id[3218].value ><br>threshold=0.6602252125740051   |
| node_246: feature_name=cg18253910 | feature_id[4458].value ><br>threshold=0.6904322504997253   |
| node_250: feature_name=cg04774476 | feature_id[1257].value ><br>threshold=0.5675267577171326   |
| node_256: feature_name=cg19259111 | feature_id[63].value ><br>threshold=0.40771469473838806    |
| node_264: feature_name=cg21483216 | feature_id[5253].value ><br>threshold=0.6332719326019287   |
| node_266: feature_name=cg04026354 | feature_id[3502].value <=<br>threshold=0.42332448065280914 |
| node_267: feature_name=cg11444072 | feature_id[116].value <=<br>threshold=0.4940422773361206   |



|                                            |                                                           |
|--------------------------------------------|-----------------------------------------------------------|
| node_268: feature_name=cg25424742          | feature_id[2698].value ><br>threshold=0.762436032295227   |
| node_270: feature_name=cg23632333          | feature_id[4343].value ><br>threshold=0.88172447681427    |
| Class: chondroblastoma (CB)                |                                                           |
| Rules_59                                   | passed counts:5                                           |
| node_0: feature_name=cg11915444            | feature_id[2002].value ><br>threshold=0.3402601182460785  |
| node_10: feature_name=cg26016985           | feature_id[4407].value ><br>threshold=0.6493876278400421  |
| node_16: feature_name=cg23157618           | feature_id[5511].value ><br>threshold=0.5759606957435608  |
| node_20: feature_name=cg10480329           | feature_id[1439].value <=<br>threshold=0.5518321692943573 |
| node_21: feature_name=cg25510609           | feature_id[149].value <=<br>threshold=0.08151235431432724 |
| node_22: feature_name=cg23850277           | feature_id[2159].value <=<br>threshold=0.5682950615882874 |
| node_23: feature_name=cg01259126           | feature_id[3146].value ><br>threshold=0.34355829656124115 |
| node_25: feature_name=cg07034004           | feature_id[3345].value ><br>threshold=0.20594919472932816 |
| Class: Langerhans cell histiocytosis (LCH) |                                                           |
| Rules_60                                   | passed counts:4                                           |
| node_0: feature_name=cg11915444            | feature_id[2002].value ><br>threshold=0.3402601182460785  |
| node_10: feature_name=cg26016985           | feature_id[4407].value ><br>threshold=0.6493876278400421  |
| node_16: feature_name=cg23157618           | feature_id[5511].value ><br>threshold=0.5759606957435608  |
| node_20: feature_name=cg10480329           | feature_id[1439].value ><br>threshold=0.5518321692943573  |
| node_48: feature_name=cg17843418           | feature_id[4868].value ><br>threshold=0.34969255328178406 |
| node_52: feature_name=cg24407065           | feature_id[4522].value ><br>threshold=0.5364363789558411  |
| node_56: feature_name=cg07281938           | feature_id[249].value ><br>threshold=0.7506992518901825   |
| node_78: feature_name=cg21759907           | feature_id[1650].value ><br>threshold=0.46823520958423615 |

|                                   |                                                           |
|-----------------------------------|-----------------------------------------------------------|
| node_98: feature_name=cg10886334  | feature_id[3975].value ><br>threshold=0.43698127567768097 |
| node_102: feature_name=cg09373983 | feature_id[5025].value ><br>threshold=0.5575815737247467  |
| node_106: feature_name=cg12948116 | feature_id[5360].value <=<br>threshold=0.5658791363239288 |
| node_107: feature_name=cg21906519 | feature_id[5251].value ><br>threshold=0.6089984774589539  |
| node_111: feature_name=cg17537493 | feature_id[4217].value ><br>threshold=0.5825372636318207  |
| node_117: feature_name=cg15720017 | feature_id[4443].value ><br>threshold=0.7009969055652618  |
| node_119: feature_name=cg06038180 | feature_id[3480].value ><br>threshold=0.4583848565816879  |
| node_121: feature_name=cg08619651 | feature_id[4882].value <=<br>threshold=0.2105495035648346 |
| node_122: feature_name=cg01014262 | feature_id[1911].value <=<br>threshold=0.5327437818050385 |
| node_123: feature_name=cg16863382 | feature_id[2922].value ><br>threshold=0.7200668156147003  |
| node_133: feature_name=cg06989443 | feature_id[2327].value <=<br>threshold=0.6579365730285645 |
| node_134: feature_name=cg07344990 | feature_id[2398].value ><br>threshold=0.5562876164913177  |
| node_138: feature_name=cg02966841 | feature_id[2199].value ><br>threshold=0.7744501233100891  |
| node_204: feature_name=cg12120430 | feature_id[3727].value ><br>threshold=0.5775820016860962  |
| node_206: feature_name=cg18386876 | feature_id[4066].value ><br>threshold=0.6847257018089294  |
| node_208: feature_name=cg02053092 | feature_id[3610].value ><br>threshold=0.39507485926151276 |
| node_210: feature_name=cg10298992 | feature_id[3603].value ><br>threshold=0.5707973837852478  |
| node_228: feature_name=cg03840920 | feature_id[4524].value ><br>threshold=0.5365143716335297  |
| node_234: feature_name=cg25364972 | feature_id[1792].value ><br>threshold=0.2418053299188614  |
| node_238: feature_name=cg23485307 | feature_id[221].value ><br>threshold=0.14884746074676514  |
| node_242: feature_name=cg04873169 | feature_id[4696].value ><br>threshold=0.6058756709098816  |
| node_244: feature_name=cg17009731 | feature_id[3218].value ><br>threshold=0.6602252125740051  |

|                                   |                                                           |
|-----------------------------------|-----------------------------------------------------------|
| node_246: feature_name=cg18253910 | feature_id[4458].value ><br>threshold=0.6904322504997253  |
| node_250: feature_name=cg04774476 | feature_id[1257].value ><br>threshold=0.5675267577171326  |
| node_256: feature_name=cg19259111 | feature_id[63].value ><br>threshold=0.40771469473838806   |
| node_264: feature_name=cg21483216 | feature_id[5253].value ><br>threshold=0.6332719326019287  |
| node_266: feature_name=cg04026354 | feature_id[3502].value ><br>threshold=0.42332448065280914 |
| node_336: feature_name=cg05824594 | feature_id[1431].value <=<br>threshold=0.629401296377182  |
| node_337: feature_name=cg18475969 | feature_id[2117].value <=<br>threshold=0.3116971254348755 |
| node_338: feature_name=cg19494591 | feature_id[2196].value ><br>threshold=0.7268106639385223  |
| node_340: feature_name=cg09075515 | feature_id[1529].value <=<br>threshold=0.5144184827804565 |
| Class: chordoma (CHORD)           |                                                           |
|                                   |                                                           |
| Rules_61                          | passed counts:4                                           |
| node_0: feature_name=cg11915444   | feature_id[2002].value ><br>threshold=0.3402601182460785  |
| node_10: feature_name=cg26016985  | feature_id[4407].value ><br>threshold=0.6493876278400421  |
| node_16: feature_name=cg23157618  | feature_id[5511].value ><br>threshold=0.5759606957435608  |
| node_20: feature_name=cg10480329  | feature_id[1439].value ><br>threshold=0.5518321692943573  |
| node_48: feature_name=cg17843418  | feature_id[4868].value ><br>threshold=0.34969255328178406 |
| node_52: feature_name=cg24407065  | feature_id[4522].value ><br>threshold=0.5364363789558411  |
| node_56: feature_name=cg07281938  | feature_id[249].value ><br>threshold=0.7506992518901825   |
| node_78: feature_name=cg21759907  | feature_id[1650].value ><br>threshold=0.46823520958423615 |
| node_98: feature_name=cg10886334  | feature_id[3975].value ><br>threshold=0.43698127567768097 |
| node_102: feature_name=cg09373983 | feature_id[5025].value ><br>threshold=0.5575815737247467  |
| node_106: feature_name=cg12948116 | feature_id[5360].value <=<br>threshold=0.5658791363239288 |

|                                   |                                                           |
|-----------------------------------|-----------------------------------------------------------|
| node_107: feature_name=cg21906519 | feature_id[5251].value ><br>threshold=0.6089984774589539  |
| node_111: feature_name=cg17537493 | feature_id[4217].value ><br>threshold=0.5825372636318207  |
| node_117: feature_name=cg15720017 | feature_id[4443].value ><br>threshold=0.7009969055652618  |
| node_119: feature_name=cg06038180 | feature_id[3480].value ><br>threshold=0.4583848565816879  |
| node_121: feature_name=cg08619651 | feature_id[4882].value <=<br>threshold=0.2105495035648346 |
| node_122: feature_name=cg01014262 | feature_id[1911].value <=<br>threshold=0.5327437818050385 |
| node_123: feature_name=cg16863382 | feature_id[2922].value ><br>threshold=0.7200668156147003  |
| node_133: feature_name=cg06989443 | feature_id[2327].value <=<br>threshold=0.6579365730285645 |
| node_134: feature_name=cg07344990 | feature_id[2398].value ><br>threshold=0.5562876164913177  |
| node_138: feature_name=cg02966841 | feature_id[2199].value ><br>threshold=0.7744501233100891  |
| node_204: feature_name=cg12120430 | feature_id[3727].value ><br>threshold=0.5775820016860962  |
| node_206: feature_name=cg18386876 | feature_id[4066].value ><br>threshold=0.6847257018089294  |
| node_208: feature_name=cg02053092 | feature_id[3610].value ><br>threshold=0.39507485926151276 |
| node_210: feature_name=cg10298992 | feature_id[3603].value ><br>threshold=0.5707973837852478  |
| node_228: feature_name=cg03840920 | feature_id[4524].value ><br>threshold=0.5365143716335297  |
| node_234: feature_name=cg25364972 | feature_id[1792].value ><br>threshold=0.2418053299188614  |
| node_238: feature_name=cg23485307 | feature_id[221].value ><br>threshold=0.14884746074676514  |
| node_242: feature_name=cg04873169 | feature_id[4696].value ><br>threshold=0.6058756709098816  |
| node_244: feature_name=cg17009731 | feature_id[3218].value ><br>threshold=0.6602252125740051  |
| node_246: feature_name=cg18253910 | feature_id[4458].value ><br>threshold=0.6904322504997253  |
| node_250: feature_name=cg04774476 | feature_id[1257].value ><br>threshold=0.5675267577171326  |
| node_256: feature_name=cg19259111 | feature_id[63].value ><br>threshold=0.40771469473838806   |

|                                   |                                                            |
|-----------------------------------|------------------------------------------------------------|
| node_264: feature_name=cg21483216 | feature_id[5253].value ><br>threshold=0.6332719326019287   |
| node_266: feature_name=cg04026354 | feature_id[3502].value <=<br>threshold=0.42332448065280914 |
| node_267: feature_name=cg11444072 | feature_id[116].value ><br>threshold=0.4940422773361206    |
| node_273: feature_name=cg08571020 | feature_id[381].value ><br>threshold=0.4616774618625641    |
| node_275: feature_name=cg08331427 | feature_id[2081].value ><br>threshold=0.5443233847618103   |
| node_281: feature_name=cg00216961 | feature_id[945].value <=<br>threshold=0.4166988283395767   |
| node_282: feature_name=cg04716580 | feature_id[1390].value ><br>threshold=0.4204266667366028   |
| node_286: feature_name=cg07891483 | feature_id[1877].value ><br>threshold=0.829958975315094    |
| node_288: feature_name=cg01475325 | feature_id[3969].value ><br>threshold=0.45323844254016876  |
| node_292: feature_name=cg19702397 | feature_id[2066].value ><br>threshold=0.3536848723888397   |
| node_294: feature_name=cg21936959 | feature_id[595].value ><br>threshold=0.5567200481891632    |
| node_308: feature_name=cg18645642 | feature_id[262].value ><br>threshold=0.42608243227005005   |
| node_310: feature_name=cg27351239 | feature_id[1874].value <=<br>threshold=0.6790103316307068  |
| node_311: feature_name=cg13107973 | feature_id[1326].value ><br>threshold=0.6562457382678986   |
| Class: chondrosarcoma (CSA)       |                                                            |
|                                   |                                                            |
| Rules_62                          | passed counts:4                                            |
| node_0: feature_name=cg11915444   | feature_id[2002].value ><br>threshold=0.3402601182460785   |
| node_10: feature_name=cg26016985  | feature_id[4407].value ><br>threshold=0.6493876278400421   |
| node_16: feature_name=cg23157618  | feature_id[5511].value ><br>threshold=0.5759606957435608   |
| node_20: feature_name=cg10480329  | feature_id[1439].value ><br>threshold=0.5518321692943573   |
| node_48: feature_name=cg17843418  | feature_id[4868].value ><br>threshold=0.34969255328178406  |
| node_52: feature_name=cg24407065  | feature_id[4522].value ><br>threshold=0.5364363789558411   |

|                                   |                                                            |
|-----------------------------------|------------------------------------------------------------|
| node_56: feature_name=cg07281938  | feature_id[249].value ><br>threshold=0.7506992518901825    |
| node_78: feature_name=cg21759907  | feature_id[1650].value ><br>threshold=0.46823520958423615  |
| node_98: feature_name=cg10886334  | feature_id[3975].value ><br>threshold=0.43698127567768097  |
| node_102: feature_name=cg09373983 | feature_id[5025].value ><br>threshold=0.5575815737247467   |
| node_106: feature_name=cg12948116 | feature_id[5360].value <=<br>threshold=0.5658791363239288  |
| node_107: feature_name=cg21906519 | feature_id[5251].value ><br>threshold=0.6089984774589539   |
| node_111: feature_name=cg17537493 | feature_id[4217].value ><br>threshold=0.5825372636318207   |
| node_117: feature_name=cg15720017 | feature_id[4443].value ><br>threshold=0.7009969055652618   |
| node_119: feature_name=cg06038180 | feature_id[3480].value ><br>threshold=0.4583848565816879   |
| node_121: feature_name=cg08619651 | feature_id[4882].value <=<br>threshold=0.2105495035648346  |
| node_122: feature_name=cg01014262 | feature_id[1911].value <=<br>threshold=0.5327437818050385  |
| node_123: feature_name=cg16863382 | feature_id[2922].value ><br>threshold=0.7200668156147003   |
| node_133: feature_name=cg06989443 | feature_id[2327].value <=<br>threshold=0.6579365730285645  |
| node_134: feature_name=cg07344990 | feature_id[2398].value ><br>threshold=0.5562876164913177   |
| node_138: feature_name=cg02966841 | feature_id[2199].value ><br>threshold=0.7744501233100891   |
| node_204: feature_name=cg12120430 | feature_id[3727].value ><br>threshold=0.5775820016860962   |
| node_206: feature_name=cg18386876 | feature_id[4066].value ><br>threshold=0.6847257018089294   |
| node_208: feature_name=cg02053092 | feature_id[3610].value ><br>threshold=0.39507485926151276  |
| node_210: feature_name=cg10298992 | feature_id[3603].value <=<br>threshold=0.5707973837852478  |
| node_211: feature_name=cg02436098 | feature_id[1712].value <=<br>threshold=0.27362556010484695 |
| node_212: feature_name=cg15464763 | feature_id[2786].value <=<br>threshold=0.6618955731391907  |
| Class: rhabdomyosarcoma (RMS)     |                                                            |

|                                   |                                                           |
|-----------------------------------|-----------------------------------------------------------|
|                                   |                                                           |
| Rules_63                          | passed counts:4                                           |
| node_0: feature_name=cg11915444   | feature_id[2002].value ><br>threshold=0.3402601182460785  |
| node_10: feature_name=cg26016985  | feature_id[4407].value ><br>threshold=0.6493876278400421  |
| node_16: feature_name=cg23157618  | feature_id[5511].value ><br>threshold=0.5759606957435608  |
| node_20: feature_name=cg10480329  | feature_id[1439].value ><br>threshold=0.5518321692943573  |
| node_48: feature_name=cg17843418  | feature_id[4868].value ><br>threshold=0.34969255328178406 |
| node_52: feature_name=cg24407065  | feature_id[4522].value ><br>threshold=0.5364363789558411  |
| node_56: feature_name=cg07281938  | feature_id[249].value ><br>threshold=0.7506992518901825   |
| node_78: feature_name=cg21759907  | feature_id[1650].value ><br>threshold=0.46823520958423615 |
| node_98: feature_name=cg10886334  | feature_id[3975].value ><br>threshold=0.43698127567768097 |
| node_102: feature_name=cg09373983 | feature_id[5025].value ><br>threshold=0.5575815737247467  |
| node_106: feature_name=cg12948116 | feature_id[5360].value <=<br>threshold=0.5658791363239288 |
| node_107: feature_name=cg21906519 | feature_id[5251].value ><br>threshold=0.6089984774589539  |
| node_111: feature_name=cg17537493 | feature_id[4217].value ><br>threshold=0.5825372636318207  |
| node_117: feature_name=cg15720017 | feature_id[4443].value ><br>threshold=0.7009969055652618  |
| node_119: feature_name=cg06038180 | feature_id[3480].value ><br>threshold=0.4583848565816879  |
| node_121: feature_name=cg08619651 | feature_id[4882].value <=<br>threshold=0.2105495035648346 |
| node_122: feature_name=cg01014262 | feature_id[1911].value <=<br>threshold=0.5327437818050385 |
| node_123: feature_name=cg16863382 | feature_id[2922].value ><br>threshold=0.7200668156147003  |
| node_133: feature_name=cg06989443 | feature_id[2327].value <=<br>threshold=0.6579365730285645 |
| node_134: feature_name=cg07344990 | feature_id[2398].value ><br>threshold=0.5562876164913177  |

|                                   |                                                            |
|-----------------------------------|------------------------------------------------------------|
| node_138: feature_name=cg02966841 | feature_id[2199].value <=<br>threshold=0.7744501233100891  |
| node_139: feature_name=cg06989253 | feature_id[194].value <=<br>threshold=0.7899391353130341   |
| node_140: feature_name=cg24617568 | feature_id[3282].value <=<br>threshold=0.26932457089424133 |
| node_141: feature_name=cg12614090 | feature_id[2765].value <=<br>threshold=0.1813211366534233  |
| node_142: feature_name=cg10917602 | feature_id[4685].value <=<br>threshold=0.5744736790657043  |
| node_143: feature_name=cg23723410 | feature_id[34].value ><br>threshold=0.3201078921556473     |
| Class: sarcoma (SARC)             |                                                            |
|                                   |                                                            |
| Rules_64                          | passed counts:4                                            |
| node_0: feature_name=cg11915444   | feature_id[2002].value ><br>threshold=0.3402601182460785   |
| node_10: feature_name=cg26016985  | feature_id[4407].value ><br>threshold=0.6493876278400421   |
| node_16: feature_name=cg23157618  | feature_id[5511].value ><br>threshold=0.5759606957435608   |
| node_20: feature_name=cg10480329  | feature_id[1439].value ><br>threshold=0.5518321692943573   |
| node_48: feature_name=cg17843418  | feature_id[4868].value ><br>threshold=0.34969255328178406  |
| node_52: feature_name=cg24407065  | feature_id[4522].value ><br>threshold=0.5364363789558411   |
| node_56: feature_name=cg07281938  | feature_id[249].value ><br>threshold=0.7506992518901825    |
| node_78: feature_name=cg21759907  | feature_id[1650].value ><br>threshold=0.46823520958423615  |
| node_98: feature_name=cg10886334  | feature_id[3975].value ><br>threshold=0.43698127567768097  |
| node_102: feature_name=cg09373983 | feature_id[5025].value ><br>threshold=0.5575815737247467   |
| node_106: feature_name=cg12948116 | feature_id[5360].value <=<br>threshold=0.5658791363239288  |
| node_107: feature_name=cg21906519 | feature_id[5251].value ><br>threshold=0.6089984774589539   |
| node_111: feature_name=cg17537493 | feature_id[4217].value ><br>threshold=0.5825372636318207   |
| node_117: feature_name=cg15720017 | feature_id[4443].value ><br>threshold=0.7009969055652618   |



|                                               |                                                            |
|-----------------------------------------------|------------------------------------------------------------|
| node_119: feature_name=cg06038180             | feature_id[3480].value ><br>threshold=0.4583848565816879   |
| node_121: feature_name=cg08619651             | feature_id[4882].value <=<br>threshold=0.2105495035648346  |
| node_122: feature_name=cg01014262             | feature_id[1911].value <=<br>threshold=0.5327437818050385  |
| node_123: feature_name=cg16863382             | feature_id[2922].value ><br>threshold=0.7200668156147003   |
| node_133: feature_name=cg06989443             | feature_id[2327].value <=<br>threshold=0.6579365730285645  |
| node_134: feature_name=cg07344990             | feature_id[2398].value ><br>threshold=0.5562876164913177   |
| node_138: feature_name=cg02966841             | feature_id[2199].value <=<br>threshold=0.7744501233100891  |
| node_139: feature_name=cg06989253             | feature_id[194].value <=<br>threshold=0.7899391353130341   |
| node_140: feature_name=cg24617568             | feature_id[3282].value <=<br>threshold=0.26932457089424133 |
| node_141: feature_name=cg12614090             | feature_id[2765].value <=<br>threshold=0.1813211366534233  |
| node_142: feature_name=cg10917602             | feature_id[4685].value <=<br>threshold=0.5744736790657043  |
| node_143: feature_name=cg23723410             | feature_id[34].value <=<br>threshold=0.3201078921556473    |
| node_144: feature_name=cg26804423             | feature_id[1725].value <=<br>threshold=0.39587317407131195 |
| Class: clear cell sarcoma of soft parts (CCS) |                                                            |
|                                               |                                                            |
| Rules_65                                      | passed counts:4                                            |
| node_0: feature_name=cg11915444               | feature_id[2002].value ><br>threshold=0.3402601182460785   |
| node_10: feature_name=cg26016985              | feature_id[4407].value ><br>threshold=0.6493876278400421   |
| node_16: feature_name=cg23157618              | feature_id[5511].value ><br>threshold=0.5759606957435608   |
| node_20: feature_name=cg10480329              | feature_id[1439].value ><br>threshold=0.5518321692943573   |
| node_48: feature_name=cg17843418              | feature_id[4868].value ><br>threshold=0.34969255328178406  |
| node_52: feature_name=cg24407065              | feature_id[4522].value ><br>threshold=0.5364363789558411   |
| node_56: feature_name=cg07281938              | feature_id[249].value ><br>threshold=0.7506992518901825    |

|                                              |                                                           |
|----------------------------------------------|-----------------------------------------------------------|
| node_78: feature_name=cg21759907             | feature_id[1650].value ><br>threshold=0.46823520958423615 |
| node_98: feature_name=cg10886334             | feature_id[3975].value ><br>threshold=0.43698127567768097 |
| node_102: feature_name=cg09373983            | feature_id[5025].value ><br>threshold=0.5575815737247467  |
| node_106: feature_name=cg12948116            | feature_id[5360].value <=<br>threshold=0.5658791363239288 |
| node_107: feature_name=cg21906519            | feature_id[5251].value ><br>threshold=0.6089984774589539  |
| node_111: feature_name=cg17537493            | feature_id[4217].value ><br>threshold=0.5825372636318207  |
| node_117: feature_name=cg15720017            | feature_id[4443].value ><br>threshold=0.7009969055652618  |
| node_119: feature_name=cg06038180            | feature_id[3480].value ><br>threshold=0.4583848565816879  |
| node_121: feature_name=cg08619651            | feature_id[4882].value <=<br>threshold=0.2105495035648346 |
| node_122: feature_name=cg01014262            | feature_id[1911].value <=<br>threshold=0.5327437818050385 |
| node_123: feature_name=cg16863382            | feature_id[2922].value <=<br>threshold=0.7200668156147003 |
| node_124: feature_name=cg11225330            | feature_id[3185].value ><br>threshold=0.7814575433731079  |
| node_126: feature_name=cg15543534            | feature_id[423].value ><br>threshold=0.86179119348526     |
| Class: alveolar rhabdomyosarcoma (RMS (ALV)) |                                                           |
|                                              |                                                           |
| Rules_66                                     | passed counts:4                                           |
| node_0: feature_name=cg11915444              | feature_id[2002].value ><br>threshold=0.3402601182460785  |
| node_10: feature_name=cg26016985             | feature_id[4407].value ><br>threshold=0.6493876278400421  |
| node_16: feature_name=cg23157618             | feature_id[5511].value ><br>threshold=0.5759606957435608  |
| node_20: feature_name=cg10480329             | feature_id[1439].value ><br>threshold=0.5518321692943573  |
| node_48: feature_name=cg17843418             | feature_id[4868].value ><br>threshold=0.34969255328178406 |
| node_52: feature_name=cg24407065             | feature_id[4522].value ><br>threshold=0.5364363789558411  |

|                                             |                                                           |
|---------------------------------------------|-----------------------------------------------------------|
| node_56: feature_name=cg07281938            | feature_id[249].value <=<br>threshold=0.7506992518901825  |
| node_57: feature_name=cg21189849            | feature_id[1261].value ><br>threshold=0.7545044124126434  |
| node_63: feature_name=cg18048309            | feature_id[2794].value ><br>threshold=0.36701037734746933 |
| node_65: feature_name=cg05851887            | feature_id[4211].value ><br>threshold=0.7704950571060181  |
| Class: clear cell chondrosarcoma (CSA (CC)) |                                                           |
|                                             |                                                           |
| Rules_67                                    | passed counts:4                                           |
| node_0: feature_name=cg11915444             | feature_id[2002].value ><br>threshold=0.3402601182460785  |
| node_10: feature_name=cg26016985            | feature_id[4407].value ><br>threshold=0.6493876278400421  |
| node_16: feature_name=cg23157618            | feature_id[5511].value ><br>threshold=0.5759606957435608  |
| node_20: feature_name=cg10480329            | feature_id[1439].value ><br>threshold=0.5518321692943573  |
| node_48: feature_name=cg17843418            | feature_id[4868].value ><br>threshold=0.34969255328178406 |
| node_52: feature_name=cg24407065            | feature_id[4522].value ><br>threshold=0.5364363789558411  |
| node_56: feature_name=cg07281938            | feature_id[249].value <=<br>threshold=0.7506992518901825  |
| node_57: feature_name=cg21189849            | feature_id[1261].value ><br>threshold=0.7545044124126434  |
| node_63: feature_name=cg18048309            | feature_id[2794].value ><br>threshold=0.36701037734746933 |
| node_65: feature_name=cg05851887            | feature_id[4211].value <=<br>threshold=0.7704950571060181 |
| node_66: feature_name=cg22575379            | feature_id[2711].value <=<br>threshold=0.4320530295372009 |
| Class: chordoma (CHORD)                     |                                                           |
|                                             |                                                           |
| Rules_68                                    | passed counts:3                                           |
| node_0: feature_name=cg11915444             | feature_id[2002].value ><br>threshold=0.3402601182460785  |
| node_10: feature_name=cg26016985            | feature_id[4407].value ><br>threshold=0.6493876278400421  |
| node_16: feature_name=cg23157618            | feature_id[5511].value ><br>threshold=0.5759606957435608  |

|                                               |                                                           |
|-----------------------------------------------|-----------------------------------------------------------|
| node_20: feature_name=cg10480329              | feature_id[1439].value ><br>threshold=0.5518321692943573  |
| node_48: feature_name=cg17843418              | feature_id[4868].value ><br>threshold=0.34969255328178406 |
| node_52: feature_name=cg24407065              | feature_id[4522].value ><br>threshold=0.5364363789558411  |
| node_56: feature_name=cg07281938              | feature_id[249].value ><br>threshold=0.7506992518901825   |
| node_78: feature_name=cg21759907              | feature_id[1650].value ><br>threshold=0.46823520958423615 |
| node_98: feature_name=cg10886334              | feature_id[3975].value ><br>threshold=0.43698127567768097 |
| node_102: feature_name=cg09373983             | feature_id[5025].value ><br>threshold=0.5575815737247467  |
| node_106: feature_name=cg12948116             | feature_id[5360].value <=<br>threshold=0.5658791363239288 |
| node_107: feature_name=cg21906519             | feature_id[5251].value ><br>threshold=0.6089984774589539  |
| node_111: feature_name=cg17537493             | feature_id[4217].value ><br>threshold=0.5825372636318207  |
| node_117: feature_name=cg15720017             | feature_id[4443].value ><br>threshold=0.7009969055652618  |
| node_119: feature_name=cg06038180             | feature_id[3480].value ><br>threshold=0.4583848565816879  |
| node_121: feature_name=cg08619651             | feature_id[4882].value <=<br>threshold=0.2105495035648346 |
| node_122: feature_name=cg01014262             | feature_id[1911].value <=<br>threshold=0.5327437818050385 |
| node_123: feature_name=cg16863382             | feature_id[2922].value ><br>threshold=0.7200668156147003  |
| node_133: feature_name=cg06989443             | feature_id[2327].value ><br>threshold=0.6579365730285645  |
| node_355: feature_name=cg27470978             | feature_id[4804].value ><br>threshold=0.6264137625694275  |
| node_361: feature_name=cg20252837             | feature_id[420].value ><br>threshold=0.53105828166008     |
| node_363: feature_name=cg27437304             | feature_id[1051].value ><br>threshold=0.7641371190547943  |
| node_365: feature_name=cg08215532             | feature_id[3203].value ><br>threshold=0.45234426856040955 |
| Class: embryonal rhabdomyosarcoma (RMS (EMB)) |                                                           |
|                                               |                                                           |

|                                   |                                                           |
|-----------------------------------|-----------------------------------------------------------|
| Rules_69                          | passed counts:3                                           |
| node_0: feature_name=cg11915444   | feature_id[2002].value ><br>threshold=0.3402601182460785  |
| node_10: feature_name=cg26016985  | feature_id[4407].value ><br>threshold=0.6493876278400421  |
| node_16: feature_name=cg23157618  | feature_id[5511].value ><br>threshold=0.5759606957435608  |
| node_20: feature_name=cg10480329  | feature_id[1439].value ><br>threshold=0.5518321692943573  |
| node_48: feature_name=cg17843418  | feature_id[4868].value ><br>threshold=0.34969255328178406 |
| node_52: feature_name=cg24407065  | feature_id[4522].value ><br>threshold=0.5364363789558411  |
| node_56: feature_name=cg07281938  | feature_id[249].value ><br>threshold=0.7506992518901825   |
| node_78: feature_name=cg21759907  | feature_id[1650].value ><br>threshold=0.46823520958423615 |
| node_98: feature_name=cg10886334  | feature_id[3975].value ><br>threshold=0.43698127567768097 |
| node_102: feature_name=cg09373983 | feature_id[5025].value ><br>threshold=0.5575815737247467  |
| node_106: feature_name=cg12948116 | feature_id[5360].value <=<br>threshold=0.5658791363239288 |
| node_107: feature_name=cg21906519 | feature_id[5251].value ><br>threshold=0.6089984774589539  |
| node_111: feature_name=cg17537493 | feature_id[4217].value ><br>threshold=0.5825372636318207  |
| node_117: feature_name=cg15720017 | feature_id[4443].value ><br>threshold=0.7009969055652618  |
| node_119: feature_name=cg06038180 | feature_id[3480].value ><br>threshold=0.4583848565816879  |
| node_121: feature_name=cg08619651 | feature_id[4882].value <=<br>threshold=0.2105495035648346 |
| node_122: feature_name=cg01014262 | feature_id[1911].value <=<br>threshold=0.5327437818050385 |
| node_123: feature_name=cg16863382 | feature_id[2922].value ><br>threshold=0.7200668156147003  |
| node_133: feature_name=cg06989443 | feature_id[2327].value ><br>threshold=0.6579365730285645  |
| node_355: feature_name=cg27470978 | feature_id[4804].value ><br>threshold=0.6264137625694275  |
| node_361: feature_name=cg20252837 | feature_id[420].value ><br>threshold=0.53105828166008     |

|                                                             |                                                           |
|-------------------------------------------------------------|-----------------------------------------------------------|
| node_363: feature_name=cg27437304                           | feature_id[1051].value <=<br>threshold=0.7641371190547943 |
| Class: high-grade endometrial stromal sarcoma<br>(ESS (HG)) |                                                           |
| Rules_70                                                    | passed counts:3                                           |
| node_0: feature_name=cg11915444                             | feature_id[2002].value ><br>threshold=0.3402601182460785  |
| node_10: feature_name=cg26016985                            | feature_id[4407].value ><br>threshold=0.6493876278400421  |
| node_16: feature_name=cg23157618                            | feature_id[5511].value ><br>threshold=0.5759606957435608  |
| node_20: feature_name=cg10480329                            | feature_id[1439].value ><br>threshold=0.5518321692943573  |
| node_48: feature_name=cg17843418                            | feature_id[4868].value ><br>threshold=0.34969255328178406 |
| node_52: feature_name=cg24407065                            | feature_id[4522].value ><br>threshold=0.5364363789558411  |
| node_56: feature_name=cg07281938                            | feature_id[249].value ><br>threshold=0.7506992518901825   |
| node_78: feature_name=cg21759907                            | feature_id[1650].value ><br>threshold=0.46823520958423615 |
| node_98: feature_name=cg10886334                            | feature_id[3975].value ><br>threshold=0.43698127567768097 |
| node_102: feature_name=cg09373983                           | feature_id[5025].value ><br>threshold=0.5575815737247467  |
| node_106: feature_name=cg12948116                           | feature_id[5360].value <=<br>threshold=0.5658791363239288 |
| node_107: feature_name=cg21906519                           | feature_id[5251].value ><br>threshold=0.6089984774589539  |
| node_111: feature_name=cg17537493                           | feature_id[4217].value ><br>threshold=0.5825372636318207  |
| node_117: feature_name=cg15720017                           | feature_id[4443].value ><br>threshold=0.7009969055652618  |
| node_119: feature_name=cg06038180                           | feature_id[3480].value ><br>threshold=0.4583848565816879  |
| node_121: feature_name=cg08619651                           | feature_id[4882].value <=<br>threshold=0.2105495035648346 |
| node_122: feature_name=cg01014262                           | feature_id[1911].value <=<br>threshold=0.5327437818050385 |
| node_123: feature_name=cg16863382                           | feature_id[2922].value ><br>threshold=0.7200668156147003  |

|                                   |                                                            |
|-----------------------------------|------------------------------------------------------------|
| node_133: feature_name=cg06989443 | feature_id[2327].value <=<br>threshold=0.6579365730285645  |
| node_134: feature_name=cg07344990 | feature_id[2398].value ><br>threshold=0.5562876164913177   |
| node_138: feature_name=cg02966841 | feature_id[2199].value ><br>threshold=0.7744501233100891   |
| node_204: feature_name=cg12120430 | feature_id[3727].value ><br>threshold=0.5775820016860962   |
| node_206: feature_name=cg18386876 | feature_id[4066].value ><br>threshold=0.6847257018089294   |
| node_208: feature_name=cg02053092 | feature_id[3610].value ><br>threshold=0.39507485926151276  |
| node_210: feature_name=cg10298992 | feature_id[3603].value ><br>threshold=0.5707973837852478   |
| node_228: feature_name=cg03840920 | feature_id[4524].value ><br>threshold=0.5365143716335297   |
| node_234: feature_name=cg25364972 | feature_id[1792].value ><br>threshold=0.2418053299188614   |
| node_238: feature_name=cg23485307 | feature_id[221].value ><br>threshold=0.14884746074676514   |
| node_242: feature_name=cg04873169 | feature_id[4696].value ><br>threshold=0.6058756709098816   |
| node_244: feature_name=cg17009731 | feature_id[3218].value ><br>threshold=0.6602252125740051   |
| node_246: feature_name=cg18253910 | feature_id[4458].value ><br>threshold=0.6904322504997253   |
| node_250: feature_name=cg04774476 | feature_id[1257].value ><br>threshold=0.5675267577171326   |
| node_256: feature_name=cg19259111 | feature_id[63].value ><br>threshold=0.40771469473838806    |
| node_264: feature_name=cg21483216 | feature_id[5253].value ><br>threshold=0.6332719326019287   |
| node_266: feature_name=cg04026354 | feature_id[3502].value <=<br>threshold=0.42332448065280914 |
| node_267: feature_name=cg11444072 | feature_id[116].value ><br>threshold=0.4940422773361206    |
| node_273: feature_name=cg08571020 | feature_id[381].value ><br>threshold=0.4616774618625641    |
| node_275: feature_name=cg08331427 | feature_id[2081].value ><br>threshold=0.5443233847618103   |
| node_281: feature_name=cg00216961 | feature_id[945].value <=<br>threshold=0.4166988283395767   |
| node_282: feature_name=cg04716580 | feature_id[1390].value ><br>threshold=0.4204266667366028   |

|                                   |                                                           |
|-----------------------------------|-----------------------------------------------------------|
| node_286: feature_name=cg07891483 | feature_id[1877].value ><br>threshold=0.829958975315094   |
| node_288: feature_name=cg01475325 | feature_id[3969].value ><br>threshold=0.45323844254016876 |
| node_292: feature_name=cg19702397 | feature_id[2066].value ><br>threshold=0.3536848723888397  |
| node_294: feature_name=cg21936959 | feature_id[595].value ><br>threshold=0.5567200481891632   |
| node_308: feature_name=cg18645642 | feature_id[262].value ><br>threshold=0.42608243227005005  |
| node_310: feature_name=cg27351239 | feature_id[1874].value <=<br>threshold=0.6790103316307068 |
| node_311: feature_name=cg13107973 | feature_id[1326].value <=<br>threshold=0.6562457382678986 |
| node_312: feature_name=cg10024583 | feature_id[1175].value ><br>threshold=0.518094539642334   |
| Class: rhabdomyosarcoma (RMS)     |                                                           |
| Rules_71                          | passed counts:3                                           |
| node_0: feature_name=cg11915444   | feature_id[2002].value ><br>threshold=0.3402601182460785  |
| node_10: feature_name=cg26016985  | feature_id[4407].value ><br>threshold=0.6493876278400421  |
| node_16: feature_name=cg23157618  | feature_id[5511].value ><br>threshold=0.5759606957435608  |
| node_20: feature_name=cg10480329  | feature_id[1439].value ><br>threshold=0.5518321692943573  |
| node_48: feature_name=cg17843418  | feature_id[4868].value ><br>threshold=0.34969255328178406 |
| node_52: feature_name=cg24407065  | feature_id[4522].value ><br>threshold=0.5364363789558411  |
| node_56: feature_name=cg07281938  | feature_id[249].value ><br>threshold=0.7506992518901825   |
| node_78: feature_name=cg21759907  | feature_id[1650].value ><br>threshold=0.46823520958423615 |
| node_98: feature_name=cg10886334  | feature_id[3975].value ><br>threshold=0.43698127567768097 |
| node_102: feature_name=cg09373983 | feature_id[5025].value ><br>threshold=0.5575815737247467  |
| node_106: feature_name=cg12948116 | feature_id[5360].value <=<br>threshold=0.5658791363239288 |
| node_107: feature_name=cg21906519 | feature_id[5251].value ><br>threshold=0.6089984774589539  |



|                                   |                                                           |
|-----------------------------------|-----------------------------------------------------------|
| node_111: feature_name=cg17537493 | feature_id[4217].value ><br>threshold=0.5825372636318207  |
| node_117: feature_name=cg15720017 | feature_id[4443].value ><br>threshold=0.7009969055652618  |
| node_119: feature_name=cg06038180 | feature_id[3480].value ><br>threshold=0.4583848565816879  |
| node_121: feature_name=cg08619651 | feature_id[4882].value <=<br>threshold=0.2105495035648346 |
| node_122: feature_name=cg01014262 | feature_id[1911].value <=<br>threshold=0.5327437818050385 |
| node_123: feature_name=cg16863382 | feature_id[2922].value ><br>threshold=0.7200668156147003  |
| node_133: feature_name=cg06989443 | feature_id[2327].value <=<br>threshold=0.6579365730285645 |
| node_134: feature_name=cg07344990 | feature_id[2398].value ><br>threshold=0.5562876164913177  |
| node_138: feature_name=cg02966841 | feature_id[2199].value ><br>threshold=0.7744501233100891  |
| node_204: feature_name=cg12120430 | feature_id[3727].value ><br>threshold=0.5775820016860962  |
| node_206: feature_name=cg18386876 | feature_id[4066].value ><br>threshold=0.6847257018089294  |
| node_208: feature_name=cg02053092 | feature_id[3610].value ><br>threshold=0.39507485926151276 |
| node_210: feature_name=cg10298992 | feature_id[3603].value ><br>threshold=0.5707973837852478  |
| node_228: feature_name=cg03840920 | feature_id[4524].value ><br>threshold=0.5365143716335297  |
| node_234: feature_name=cg25364972 | feature_id[1792].value ><br>threshold=0.2418053299188614  |
| node_238: feature_name=cg23485307 | feature_id[221].value ><br>threshold=0.14884746074676514  |
| node_242: feature_name=cg04873169 | feature_id[4696].value ><br>threshold=0.6058756709098816  |
| node_244: feature_name=cg17009731 | feature_id[3218].value ><br>threshold=0.6602252125740051  |
| node_246: feature_name=cg18253910 | feature_id[4458].value ><br>threshold=0.6904322504997253  |
| node_250: feature_name=cg04774476 | feature_id[1257].value ><br>threshold=0.5675267577171326  |
| node_256: feature_name=cg19259111 | feature_id[63].value <=<br>threshold=0.40771469473838806  |
| node_257: feature_name=cg10803714 | feature_id[856].value ><br>threshold=0.4142659604549408   |

|                                                          |                                                           |
|----------------------------------------------------------|-----------------------------------------------------------|
| node_259: feature_name=cg23350812                        | feature_id[1133].value <=<br>threshold=0.8047192692756653 |
| Class: high-grade endometrial stromal sarcoma (ESS (HG)) |                                                           |
|                                                          |                                                           |
| Rules_72                                                 | passed counts:3                                           |
| node_0: feature_name=cg11915444                          | feature_id[2002].value ><br>threshold=0.3402601182460785  |
| node_10: feature_name=cg26016985                         | feature_id[4407].value ><br>threshold=0.6493876278400421  |
| node_16: feature_name=cg23157618                         | feature_id[5511].value ><br>threshold=0.5759606957435608  |
| node_20: feature_name=cg10480329                         | feature_id[1439].value ><br>threshold=0.5518321692943573  |
| node_48: feature_name=cg17843418                         | feature_id[4868].value ><br>threshold=0.34969255328178406 |
| node_52: feature_name=cg24407065                         | feature_id[4522].value ><br>threshold=0.5364363789558411  |
| node_56: feature_name=cg07281938                         | feature_id[249].value ><br>threshold=0.7506992518901825   |
| node_78: feature_name=cg21759907                         | feature_id[1650].value ><br>threshold=0.46823520958423615 |
| node_98: feature_name=cg10886334                         | feature_id[3975].value ><br>threshold=0.43698127567768097 |
| node_102: feature_name=cg09373983                        | feature_id[5025].value ><br>threshold=0.5575815737247467  |
| node_106: feature_name=cg12948116                        | feature_id[5360].value <=<br>threshold=0.5658791363239288 |
| node_107: feature_name=cg21906519                        | feature_id[5251].value ><br>threshold=0.6089984774589539  |
| node_111: feature_name=cg17537493                        | feature_id[4217].value ><br>threshold=0.5825372636318207  |
| node_117: feature_name=cg15720017                        | feature_id[4443].value ><br>threshold=0.7009969055652618  |
| node_119: feature_name=cg06038180                        | feature_id[3480].value ><br>threshold=0.4583848565816879  |
| node_121: feature_name=cg08619651                        | feature_id[4882].value <=<br>threshold=0.2105495035648346 |
| node_122: feature_name=cg01014262                        | feature_id[1911].value <=<br>threshold=0.5327437818050385 |
| node_123: feature_name=cg16863382                        | feature_id[2922].value ><br>threshold=0.7200668156147003  |

|                                                          |                                                            |
|----------------------------------------------------------|------------------------------------------------------------|
| node_133: feature_name=cg06989443                        | feature_id[2327].value <=<br>threshold=0.6579365730285645  |
| node_134: feature_name=cg07344990                        | feature_id[2398].value ><br>threshold=0.5562876164913177   |
| node_138: feature_name=cg02966841                        | feature_id[2199].value ><br>threshold=0.7744501233100891   |
| node_204: feature_name=cg12120430                        | feature_id[3727].value ><br>threshold=0.5775820016860962   |
| node_206: feature_name=cg18386876                        | feature_id[4066].value ><br>threshold=0.6847257018089294   |
| node_208: feature_name=cg02053092                        | feature_id[3610].value ><br>threshold=0.39507485926151276  |
| node_210: feature_name=cg10298992                        | feature_id[3603].value <=<br>threshold=0.5707973837852478  |
| node_211: feature_name=cg02436098                        | feature_id[1712].value <=<br>threshold=0.27362556010484695 |
| node_212: feature_name=cg15464763                        | feature_id[2786].value ><br>threshold=0.6618955731391907   |
| node_214: feature_name=cg15264991                        | feature_id[2805].value ><br>threshold=0.701563149690628    |
| Class: high-grade endometrial stromal sarcoma (ESS (HG)) |                                                            |
|                                                          |                                                            |
| Rules_73                                                 | passed counts:3                                            |
| node_0: feature_name=cg11915444                          | feature_id[2002].value ><br>threshold=0.3402601182460785   |
| node_10: feature_name=cg26016985                         | feature_id[4407].value ><br>threshold=0.6493876278400421   |
| node_16: feature_name=cg23157618                         | feature_id[5511].value ><br>threshold=0.5759606957435608   |
| node_20: feature_name=cg10480329                         | feature_id[1439].value ><br>threshold=0.5518321692943573   |
| node_48: feature_name=cg17843418                         | feature_id[4868].value ><br>threshold=0.34969255328178406  |
| node_52: feature_name=cg24407065                         | feature_id[4522].value ><br>threshold=0.5364363789558411   |
| node_56: feature_name=cg07281938                         | feature_id[249].value ><br>threshold=0.7506992518901825    |
| node_78: feature_name=cg21759907                         | feature_id[1650].value ><br>threshold=0.46823520958423615  |
| node_98: feature_name=cg10886334                         | feature_id[3975].value ><br>threshold=0.43698127567768097  |

|                                   |                                                           |
|-----------------------------------|-----------------------------------------------------------|
| node_102: feature_name=cg09373983 | feature_id[5025].value ><br>threshold=0.5575815737247467  |
| node_106: feature_name=cg12948116 | feature_id[5360].value <=<br>threshold=0.5658791363239288 |
| node_107: feature_name=cg21906519 | feature_id[5251].value ><br>threshold=0.6089984774589539  |
| node_111: feature_name=cg17537493 | feature_id[4217].value ><br>threshold=0.5825372636318207  |
| node_117: feature_name=cg15720017 | feature_id[4443].value ><br>threshold=0.7009969055652618  |
| node_119: feature_name=cg06038180 | feature_id[3480].value ><br>threshold=0.4583848565816879  |
| node_121: feature_name=cg08619651 | feature_id[4882].value <=<br>threshold=0.2105495035648346 |
| node_122: feature_name=cg01014262 | feature_id[1911].value <=<br>threshold=0.5327437818050385 |
| node_123: feature_name=cg16863382 | feature_id[2922].value ><br>threshold=0.7200668156147003  |
| node_133: feature_name=cg06989443 | feature_id[2327].value <=<br>threshold=0.6579365730285645 |
| node_134: feature_name=cg07344990 | feature_id[2398].value ><br>threshold=0.5562876164913177  |
| node_138: feature_name=cg02966841 | feature_id[2199].value <=<br>threshold=0.7744501233100891 |
| node_139: feature_name=cg06989253 | feature_id[194].value ><br>threshold=0.7899391353130341   |
| node_171: feature_name=cg07041720 | feature_id[932].value ><br>threshold=0.5004830807447433   |
| node_189: feature_name=cg19374752 | feature_id[196].value ><br>threshold=0.6096120476722717   |
| Class: leiomyosarcoma (LMS)       |                                                           |
|                                   |                                                           |
| Rules_74                          | passed counts:3                                           |
| node_0: feature_name=cg11915444   | feature_id[2002].value ><br>threshold=0.3402601182460785  |
| node_10: feature_name=cg26016985  | feature_id[4407].value ><br>threshold=0.6493876278400421  |
| node_16: feature_name=cg23157618  | feature_id[5511].value ><br>threshold=0.5759606957435608  |
| node_20: feature_name=cg10480329  | feature_id[1439].value ><br>threshold=0.5518321692943573  |
| node_48: feature_name=cg17843418  | feature_id[4868].value ><br>threshold=0.34969255328178406 |

|                                                                                   |                                                           |
|-----------------------------------------------------------------------------------|-----------------------------------------------------------|
| node_52: feature_name=cg24407065                                                  | feature_id[4522].value ><br>threshold=0.5364363789558411  |
| node_56: feature_name=cg07281938                                                  | feature_id[249].value ><br>threshold=0.7506992518901825   |
| node_78: feature_name=cg21759907                                                  | feature_id[1650].value ><br>threshold=0.46823520958423615 |
| node_98: feature_name=cg10886334                                                  | feature_id[3975].value ><br>threshold=0.43698127567768097 |
| node_102: feature_name=cg09373983                                                 | feature_id[5025].value ><br>threshold=0.5575815737247467  |
| node_106: feature_name=cg12948116                                                 | feature_id[5360].value <=<br>threshold=0.5658791363239288 |
| node_107: feature_name=cg21906519                                                 | feature_id[5251].value ><br>threshold=0.6089984774589539  |
| node_111: feature_name=cg17537493                                                 | feature_id[4217].value ><br>threshold=0.5825372636318207  |
| node_117: feature_name=cg15720017                                                 | feature_id[4443].value ><br>threshold=0.7009969055652618  |
| node_119: feature_name=cg06038180                                                 | feature_id[3480].value ><br>threshold=0.4583848565816879  |
| node_121: feature_name=cg08619651                                                 | feature_id[4882].value <=<br>threshold=0.2105495035648346 |
| node_122: feature_name=cg01014262                                                 | feature_id[1911].value <=<br>threshold=0.5327437818050385 |
| node_123: feature_name=cg16863382                                                 | feature_id[2922].value ><br>threshold=0.7200668156147003  |
| node_133: feature_name=cg06989443                                                 | feature_id[2327].value <=<br>threshold=0.6579365730285645 |
| node_134: feature_name=cg07344990                                                 | feature_id[2398].value ><br>threshold=0.5562876164913177  |
| node_138: feature_name=cg02966841                                                 | feature_id[2199].value <=<br>threshold=0.7744501233100891 |
| node_139: feature_name=cg06989253                                                 | feature_id[194].value ><br>threshold=0.7899391353130341   |
| node_171: feature_name=cg07041720                                                 | feature_id[932].value ><br>threshold=0.5004830807447433   |
| node_189: feature_name=cg19374752                                                 | feature_id[196].value <=<br>threshold=0.6096120476722717  |
| node_190: feature_name=cg23085846                                                 | feature_id[3499].value ><br>threshold=0.8292354643344879  |
| Class: well differentiated liposarcoma (WDLS)/dedifferentiated liposarcoma (DDLs) |                                                           |
|                                                                                   |                                                           |

|                                   |                                                           |
|-----------------------------------|-----------------------------------------------------------|
| Rules_75                          | passed counts:3                                           |
| node_0: feature_name=cg11915444   | feature_id[2002].value ><br>threshold=0.3402601182460785  |
| node_10: feature_name=cg26016985  | feature_id[4407].value ><br>threshold=0.6493876278400421  |
| node_16: feature_name=cg23157618  | feature_id[5511].value ><br>threshold=0.5759606957435608  |
| node_20: feature_name=cg10480329  | feature_id[1439].value ><br>threshold=0.5518321692943573  |
| node_48: feature_name=cg17843418  | feature_id[4868].value ><br>threshold=0.34969255328178406 |
| node_52: feature_name=cg24407065  | feature_id[4522].value ><br>threshold=0.5364363789558411  |
| node_56: feature_name=cg07281938  | feature_id[249].value ><br>threshold=0.7506992518901825   |
| node_78: feature_name=cg21759907  | feature_id[1650].value ><br>threshold=0.46823520958423615 |
| node_98: feature_name=cg10886334  | feature_id[3975].value ><br>threshold=0.43698127567768097 |
| node_102: feature_name=cg09373983 | feature_id[5025].value ><br>threshold=0.5575815737247467  |
| node_106: feature_name=cg12948116 | feature_id[5360].value <=<br>threshold=0.5658791363239288 |
| node_107: feature_name=cg21906519 | feature_id[5251].value ><br>threshold=0.6089984774589539  |
| node_111: feature_name=cg17537493 | feature_id[4217].value ><br>threshold=0.5825372636318207  |
| node_117: feature_name=cg15720017 | feature_id[4443].value ><br>threshold=0.7009969055652618  |
| node_119: feature_name=cg06038180 | feature_id[3480].value ><br>threshold=0.4583848565816879  |
| node_121: feature_name=cg08619651 | feature_id[4882].value <=<br>threshold=0.2105495035648346 |
| node_122: feature_name=cg01014262 | feature_id[1911].value <=<br>threshold=0.5327437818050385 |
| node_123: feature_name=cg16863382 | feature_id[2922].value ><br>threshold=0.7200668156147003  |
| node_133: feature_name=cg06989443 | feature_id[2327].value <=<br>threshold=0.6579365730285645 |
| node_134: feature_name=cg07344990 | feature_id[2398].value ><br>threshold=0.5562876164913177  |
| node_138: feature_name=cg02966841 | feature_id[2199].value <=<br>threshold=0.7744501233100891 |

|                                         |                                                            |
|-----------------------------------------|------------------------------------------------------------|
| node_139: feature_name=cg06989253       | feature_id[194].value <=<br>threshold=0.7899391353130341   |
| node_140: feature_name=cg24617568       | feature_id[3282].value <=<br>threshold=0.26932457089424133 |
| node_141: feature_name=cg12614090       | feature_id[2765].value <=<br>threshold=0.1813211366534233  |
| node_142: feature_name=cg10917602       | feature_id[4685].value <=<br>threshold=0.5744736790657043  |
| node_143: feature_name=cg23723410       | feature_id[34].value <=<br>threshold=0.3201078921556473    |
| node_144: feature_name=cg26804423       | feature_id[1725].value ><br>threshold=0.39587317407131195  |
| node_146: feature_name=cg20080282       | feature_id[1150].value ><br>threshold=0.856019914150238    |
| Class: undifferentiated sarcoma (USARC) |                                                            |
|                                         |                                                            |
| Rules_76                                | passed counts:3                                            |
| node_0: feature_name=cg11915444         | feature_id[2002].value ><br>threshold=0.3402601182460785   |
| node_10: feature_name=cg26016985        | feature_id[4407].value ><br>threshold=0.6493876278400421   |
| node_16: feature_name=cg23157618        | feature_id[5511].value ><br>threshold=0.5759606957435608   |
| node_20: feature_name=cg10480329        | feature_id[1439].value ><br>threshold=0.5518321692943573   |
| node_48: feature_name=cg17843418        | feature_id[4868].value ><br>threshold=0.34969255328178406  |
| node_52: feature_name=cg24407065        | feature_id[4522].value ><br>threshold=0.5364363789558411   |
| node_56: feature_name=cg07281938        | feature_id[249].value ><br>threshold=0.7506992518901825    |
| node_78: feature_name=cg21759907        | feature_id[1650].value ><br>threshold=0.46823520958423615  |
| node_98: feature_name=cg10886334        | feature_id[3975].value ><br>threshold=0.43698127567768097  |
| node_102: feature_name=cg09373983       | feature_id[5025].value ><br>threshold=0.5575815737247467   |
| node_106: feature_name=cg12948116       | feature_id[5360].value <=<br>threshold=0.5658791363239288  |
| node_107: feature_name=cg21906519       | feature_id[5251].value ><br>threshold=0.6089984774589539   |
| node_111: feature_name=cg17537493       | feature_id[4217].value <=<br>threshold=0.5825372636318207  |

|                                   |                                                            |
|-----------------------------------|------------------------------------------------------------|
| node_112: feature_name=cg07260789 | feature_id[1074].value ><br>threshold=0.8945248425006866   |
| node_114: feature_name=cg11251006 | feature_id[4182].value ><br>threshold=0.7591733336448669   |
| Class: Kaposi sarcoma (KS)        |                                                            |
| Rules_77                          | passed counts:3                                            |
| node_0: feature_name=cg11915444   | feature_id[2002].value ><br>threshold=0.3402601182460785   |
| node_10: feature_name=cg26016985  | feature_id[4407].value ><br>threshold=0.6493876278400421   |
| node_16: feature_name=cg23157618  | feature_id[5511].value ><br>threshold=0.5759606957435608   |
| node_20: feature_name=cg10480329  | feature_id[1439].value ><br>threshold=0.5518321692943573   |
| node_48: feature_name=cg17843418  | feature_id[4868].value ><br>threshold=0.34969255328178406  |
| node_52: feature_name=cg24407065  | feature_id[4522].value ><br>threshold=0.5364363789558411   |
| node_56: feature_name=cg07281938  | feature_id[249].value ><br>threshold=0.7506992518901825    |
| node_78: feature_name=cg21759907  | feature_id[1650].value <=<br>threshold=0.46823520958423615 |
| node_79: feature_name=cg25476129  | feature_id[2302].value <=<br>threshold=0.1687404215335846  |
| node_80: feature_name=cg26362368  | feature_id[414].value <=<br>threshold=0.834072083234787    |
| node_81: feature_name=cg15881332  | feature_id[154].value ><br>threshold=0.7577665150165558    |
| Class: melanoma (MEL)             |                                                            |
| Rules_78                          | passed counts:2                                            |
| node_0: feature_name=cg11915444   | feature_id[2002].value ><br>threshold=0.3402601182460785   |
| node_10: feature_name=cg26016985  | feature_id[4407].value ><br>threshold=0.6493876278400421   |
| node_16: feature_name=cg23157618  | feature_id[5511].value ><br>threshold=0.5759606957435608   |
| node_20: feature_name=cg10480329  | feature_id[1439].value ><br>threshold=0.5518321692943573   |
| node_48: feature_name=cg17843418  | feature_id[4868].value ><br>threshold=0.34969255328178406  |



|                                   |                                                           |
|-----------------------------------|-----------------------------------------------------------|
| node_52: feature_name=cg24407065  | feature_id[4522].value ><br>threshold=0.5364363789558411  |
| node_56: feature_name=cg07281938  | feature_id[249].value ><br>threshold=0.7506992518901825   |
| node_78: feature_name=cg21759907  | feature_id[1650].value ><br>threshold=0.46823520958423615 |
| node_98: feature_name=cg10886334  | feature_id[3975].value ><br>threshold=0.43698127567768097 |
| node_102: feature_name=cg09373983 | feature_id[5025].value ><br>threshold=0.5575815737247467  |
| node_106: feature_name=cg12948116 | feature_id[5360].value <=<br>threshold=0.5658791363239288 |
| node_107: feature_name=cg21906519 | feature_id[5251].value ><br>threshold=0.6089984774589539  |
| node_111: feature_name=cg17537493 | feature_id[4217].value ><br>threshold=0.5825372636318207  |
| node_117: feature_name=cg15720017 | feature_id[4443].value ><br>threshold=0.7009969055652618  |
| node_119: feature_name=cg06038180 | feature_id[3480].value ><br>threshold=0.4583848565816879  |
| node_121: feature_name=cg08619651 | feature_id[4882].value <=<br>threshold=0.2105495035648346 |
| node_122: feature_name=cg01014262 | feature_id[1911].value ><br>threshold=0.5327437818050385  |
| node_382: feature_name=cg26240231 | feature_id[4832].value <=<br>threshold=0.9200497567653656 |
| node_383: feature_name=cg09524639 | feature_id[3704].value <=<br>threshold=0.7802113592624664 |
| Class: synovial sarcoma (SYSA)    |                                                           |
|                                   |                                                           |
| Rules_79                          | passed counts:2                                           |
| node_0: feature_name=cg11915444   | feature_id[2002].value ><br>threshold=0.3402601182460785  |
| node_10: feature_name=cg26016985  | feature_id[4407].value ><br>threshold=0.6493876278400421  |
| node_16: feature_name=cg23157618  | feature_id[5511].value ><br>threshold=0.5759606957435608  |
| node_20: feature_name=cg10480329  | feature_id[1439].value ><br>threshold=0.5518321692943573  |
| node_48: feature_name=cg17843418  | feature_id[4868].value ><br>threshold=0.34969255328178406 |
| node_52: feature_name=cg24407065  | feature_id[4522].value ><br>threshold=0.5364363789558411  |

|                                   |                                                            |
|-----------------------------------|------------------------------------------------------------|
| node_56: feature_name=cg07281938  | feature_id[249].value ><br>threshold=0.7506992518901825    |
| node_78: feature_name=cg21759907  | feature_id[1650].value ><br>threshold=0.46823520958423615  |
| node_98: feature_name=cg10886334  | feature_id[3975].value ><br>threshold=0.43698127567768097  |
| node_102: feature_name=cg09373983 | feature_id[5025].value ><br>threshold=0.5575815737247467   |
| node_106: feature_name=cg12948116 | feature_id[5360].value <=<br>threshold=0.5658791363239288  |
| node_107: feature_name=cg21906519 | feature_id[5251].value ><br>threshold=0.6089984774589539   |
| node_111: feature_name=cg17537493 | feature_id[4217].value ><br>threshold=0.5825372636318207   |
| node_117: feature_name=cg15720017 | feature_id[4443].value ><br>threshold=0.7009969055652618   |
| node_119: feature_name=cg06038180 | feature_id[3480].value ><br>threshold=0.4583848565816879   |
| node_121: feature_name=cg08619651 | feature_id[4882].value <=<br>threshold=0.2105495035648346  |
| node_122: feature_name=cg01014262 | feature_id[1911].value <=<br>threshold=0.5327437818050385  |
| node_123: feature_name=cg16863382 | feature_id[2922].value ><br>threshold=0.7200668156147003   |
| node_133: feature_name=cg06989443 | feature_id[2327].value ><br>threshold=0.6579365730285645   |
| node_355: feature_name=cg27470978 | feature_id[4804].value ><br>threshold=0.6264137625694275   |
| node_361: feature_name=cg20252837 | feature_id[420].value ><br>threshold=0.53105828166008      |
| node_363: feature_name=cg27437304 | feature_id[1051].value ><br>threshold=0.7641371190547943   |
| node_365: feature_name=cg08215532 | feature_id[3203].value <=<br>threshold=0.45234426856040955 |
| node_366: feature_name=cg12486498 | feature_id[1977].value <=<br>threshold=0.237603098154068   |
| Class: rhabdomyosarcoma (RMS)     |                                                            |
| Rules_80                          | passed counts:2                                            |
| node_0: feature_name=cg11915444   | feature_id[2002].value ><br>threshold=0.3402601182460785   |
| node_10: feature_name=cg26016985  | feature_id[4407].value ><br>threshold=0.6493876278400421   |

|                                                          |                                                           |
|----------------------------------------------------------|-----------------------------------------------------------|
| node_16: feature_name=cg23157618                         | feature_id[5511].value ><br>threshold=0.5759606957435608  |
| node_20: feature_name=cg10480329                         | feature_id[1439].value ><br>threshold=0.5518321692943573  |
| node_48: feature_name=cg17843418                         | feature_id[4868].value ><br>threshold=0.34969255328178406 |
| node_52: feature_name=cg24407065                         | feature_id[4522].value ><br>threshold=0.5364363789558411  |
| node_56: feature_name=cg07281938                         | feature_id[249].value ><br>threshold=0.7506992518901825   |
| node_78: feature_name=cg21759907                         | feature_id[1650].value ><br>threshold=0.46823520958423615 |
| node_98: feature_name=cg10886334                         | feature_id[3975].value ><br>threshold=0.43698127567768097 |
| node_102: feature_name=cg09373983                        | feature_id[5025].value ><br>threshold=0.5575815737247467  |
| node_106: feature_name=cg12948116                        | feature_id[5360].value <=<br>threshold=0.5658791363239288 |
| node_107: feature_name=cg21906519                        | feature_id[5251].value ><br>threshold=0.6089984774589539  |
| node_111: feature_name=cg17537493                        | feature_id[4217].value ><br>threshold=0.5825372636318207  |
| node_117: feature_name=cg15720017                        | feature_id[4443].value ><br>threshold=0.7009969055652618  |
| node_119: feature_name=cg06038180                        | feature_id[3480].value ><br>threshold=0.4583848565816879  |
| node_121: feature_name=cg08619651                        | feature_id[4882].value <=<br>threshold=0.2105495035648346 |
| node_122: feature_name=cg01014262                        | feature_id[1911].value <=<br>threshold=0.5327437818050385 |
| node_123: feature_name=cg16863382                        | feature_id[2922].value ><br>threshold=0.7200668156147003  |
| node_133: feature_name=cg06989443                        | feature_id[2327].value ><br>threshold=0.6579365730285645  |
| node_355: feature_name=cg27470978                        | feature_id[4804].value <=<br>threshold=0.6264137625694275 |
| node_356: feature_name=cg26964426                        | feature_id[2027].value <=<br>threshold=0.665222555398941  |
| node_357: feature_name=cg22427797                        | feature_id[1292].value ><br>threshold=0.734585702419281   |
| Class: high-grade endometrial stromal sarcoma (ESS (HG)) |                                                           |
|                                                          |                                                           |

|                                   |                                                           |
|-----------------------------------|-----------------------------------------------------------|
| Rules_81                          | passed counts:2                                           |
| node_0: feature_name=cg11915444   | feature_id[2002].value ><br>threshold=0.3402601182460785  |
| node_10: feature_name=cg26016985  | feature_id[4407].value ><br>threshold=0.6493876278400421  |
| node_16: feature_name=cg23157618  | feature_id[5511].value ><br>threshold=0.5759606957435608  |
| node_20: feature_name=cg10480329  | feature_id[1439].value ><br>threshold=0.5518321692943573  |
| node_48: feature_name=cg17843418  | feature_id[4868].value ><br>threshold=0.34969255328178406 |
| node_52: feature_name=cg24407065  | feature_id[4522].value ><br>threshold=0.5364363789558411  |
| node_56: feature_name=cg07281938  | feature_id[249].value ><br>threshold=0.7506992518901825   |
| node_78: feature_name=cg21759907  | feature_id[1650].value ><br>threshold=0.46823520958423615 |
| node_98: feature_name=cg10886334  | feature_id[3975].value ><br>threshold=0.43698127567768097 |
| node_102: feature_name=cg09373983 | feature_id[5025].value ><br>threshold=0.5575815737247467  |
| node_106: feature_name=cg12948116 | feature_id[5360].value <=<br>threshold=0.5658791363239288 |
| node_107: feature_name=cg21906519 | feature_id[5251].value ><br>threshold=0.6089984774589539  |
| node_111: feature_name=cg17537493 | feature_id[4217].value ><br>threshold=0.5825372636318207  |
| node_117: feature_name=cg15720017 | feature_id[4443].value ><br>threshold=0.7009969055652618  |
| node_119: feature_name=cg06038180 | feature_id[3480].value ><br>threshold=0.4583848565816879  |
| node_121: feature_name=cg08619651 | feature_id[4882].value <=<br>threshold=0.2105495035648346 |
| node_122: feature_name=cg01014262 | feature_id[1911].value <=<br>threshold=0.5327437818050385 |
| node_123: feature_name=cg16863382 | feature_id[2922].value ><br>threshold=0.7200668156147003  |
| node_133: feature_name=cg06989443 | feature_id[2327].value ><br>threshold=0.6579365730285645  |
| node_355: feature_name=cg27470978 | feature_id[4804].value <=<br>threshold=0.6264137625694275 |
| node_356: feature_name=cg26964426 | feature_id[2027].value <=<br>threshold=0.66522255398941   |

|                                   |                                                           |
|-----------------------------------|-----------------------------------------------------------|
| node_357: feature_name=cg22427797 | feature_id[1292].value <=<br>threshold=0.734585702419281  |
| Class: sarcoma (SARC)             |                                                           |
| Rules_82                          | passed counts:2                                           |
| node_0: feature_name=cg11915444   | feature_id[2002].value ><br>threshold=0.3402601182460785  |
| node_10: feature_name=cg26016985  | feature_id[4407].value ><br>threshold=0.6493876278400421  |
| node_16: feature_name=cg23157618  | feature_id[5511].value ><br>threshold=0.5759606957435608  |
| node_20: feature_name=cg10480329  | feature_id[1439].value ><br>threshold=0.5518321692943573  |
| node_48: feature_name=cg17843418  | feature_id[4868].value ><br>threshold=0.34969255328178406 |
| node_52: feature_name=cg24407065  | feature_id[4522].value ><br>threshold=0.5364363789558411  |
| node_56: feature_name=cg07281938  | feature_id[249].value ><br>threshold=0.7506992518901825   |
| node_78: feature_name=cg21759907  | feature_id[1650].value ><br>threshold=0.46823520958423615 |
| node_98: feature_name=cg10886334  | feature_id[3975].value ><br>threshold=0.43698127567768097 |
| node_102: feature_name=cg09373983 | feature_id[5025].value ><br>threshold=0.5575815737247467  |
| node_106: feature_name=cg12948116 | feature_id[5360].value <=<br>threshold=0.5658791363239288 |
| node_107: feature_name=cg21906519 | feature_id[5251].value ><br>threshold=0.6089984774589539  |
| node_111: feature_name=cg17537493 | feature_id[4217].value ><br>threshold=0.5825372636318207  |
| node_117: feature_name=cg15720017 | feature_id[4443].value ><br>threshold=0.7009969055652618  |
| node_119: feature_name=cg06038180 | feature_id[3480].value ><br>threshold=0.4583848565816879  |
| node_121: feature_name=cg08619651 | feature_id[4882].value <=<br>threshold=0.2105495035648346 |
| node_122: feature_name=cg01014262 | feature_id[1911].value <=<br>threshold=0.5327437818050385 |
| node_123: feature_name=cg16863382 | feature_id[2922].value ><br>threshold=0.7200668156147003  |
| node_133: feature_name=cg06989443 | feature_id[2327].value <=<br>threshold=0.6579365730285645 |

|                                   |                                                           |
|-----------------------------------|-----------------------------------------------------------|
| node_134: feature_name=cg07344990 | feature_id[2398].value ><br>threshold=0.5562876164913177  |
| node_138: feature_name=cg02966841 | feature_id[2199].value ><br>threshold=0.7744501233100891  |
| node_204: feature_name=cg12120430 | feature_id[3727].value ><br>threshold=0.5775820016860962  |
| node_206: feature_name=cg18386876 | feature_id[4066].value ><br>threshold=0.6847257018089294  |
| node_208: feature_name=cg02053092 | feature_id[3610].value ><br>threshold=0.39507485926151276 |
| node_210: feature_name=cg10298992 | feature_id[3603].value ><br>threshold=0.5707973837852478  |
| node_228: feature_name=cg03840920 | feature_id[4524].value ><br>threshold=0.5365143716335297  |
| node_234: feature_name=cg25364972 | feature_id[1792].value ><br>threshold=0.2418053299188614  |
| node_238: feature_name=cg23485307 | feature_id[221].value ><br>threshold=0.14884746074676514  |
| node_242: feature_name=cg04873169 | feature_id[4696].value ><br>threshold=0.6058756709098816  |
| node_244: feature_name=cg17009731 | feature_id[3218].value ><br>threshold=0.6602252125740051  |
| node_246: feature_name=cg18253910 | feature_id[4458].value ><br>threshold=0.6904322504997253  |
| node_250: feature_name=cg04774476 | feature_id[1257].value ><br>threshold=0.5675267577171326  |
| node_256: feature_name=cg19259111 | feature_id[63].value ><br>threshold=0.40771469473838806   |
| node_264: feature_name=cg21483216 | feature_id[5253].value ><br>threshold=0.6332719326019287  |
| node_266: feature_name=cg04026354 | feature_id[3502].value ><br>threshold=0.42332448065280914 |
| node_336: feature_name=cg05824594 | feature_id[1431].value <=<br>threshold=0.629401296377182  |
| node_337: feature_name=cg18475969 | feature_id[2117].value <=<br>threshold=0.3116971254348755 |
| node_338: feature_name=cg19494591 | feature_id[2196].value ><br>threshold=0.7268106639385223  |
| node_340: feature_name=cg09075515 | feature_id[1529].value ><br>threshold=0.5144184827804565  |
| node_342: feature_name=cg09322899 | feature_id[2281].value ><br>threshold=0.9401540160179138  |
| Class: Kaposi sarcoma (KS)        |                                                           |

|                                   |                                                           |
|-----------------------------------|-----------------------------------------------------------|
|                                   |                                                           |
| Rules_83                          | passed counts:2                                           |
| node_0: feature_name=cg11915444   | feature_id[2002].value ><br>threshold=0.3402601182460785  |
| node_10: feature_name=cg26016985  | feature_id[4407].value ><br>threshold=0.6493876278400421  |
| node_16: feature_name=cg23157618  | feature_id[5511].value ><br>threshold=0.5759606957435608  |
| node_20: feature_name=cg10480329  | feature_id[1439].value ><br>threshold=0.5518321692943573  |
| node_48: feature_name=cg17843418  | feature_id[4868].value ><br>threshold=0.34969255328178406 |
| node_52: feature_name=cg24407065  | feature_id[4522].value ><br>threshold=0.5364363789558411  |
| node_56: feature_name=cg07281938  | feature_id[249].value ><br>threshold=0.7506992518901825   |
| node_78: feature_name=cg21759907  | feature_id[1650].value ><br>threshold=0.46823520958423615 |
| node_98: feature_name=cg10886334  | feature_id[3975].value ><br>threshold=0.43698127567768097 |
| node_102: feature_name=cg09373983 | feature_id[5025].value ><br>threshold=0.5575815737247467  |
| node_106: feature_name=cg12948116 | feature_id[5360].value <=<br>threshold=0.5658791363239288 |
| node_107: feature_name=cg21906519 | feature_id[5251].value ><br>threshold=0.6089984774589539  |
| node_111: feature_name=cg17537493 | feature_id[4217].value ><br>threshold=0.5825372636318207  |
| node_117: feature_name=cg15720017 | feature_id[4443].value ><br>threshold=0.7009969055652618  |
| node_119: feature_name=cg06038180 | feature_id[3480].value ><br>threshold=0.4583848565816879  |
| node_121: feature_name=cg08619651 | feature_id[4882].value <=<br>threshold=0.2105495035648346 |
| node_122: feature_name=cg01014262 | feature_id[1911].value <=<br>threshold=0.5327437818050385 |
| node_123: feature_name=cg16863382 | feature_id[2922].value ><br>threshold=0.7200668156147003  |
| node_133: feature_name=cg06989443 | feature_id[2327].value <=<br>threshold=0.6579365730285645 |
| node_134: feature_name=cg07344990 | feature_id[2398].value ><br>threshold=0.5562876164913177  |

|                                   |                                                            |
|-----------------------------------|------------------------------------------------------------|
| node_138: feature_name=cg02966841 | feature_id[2199].value ><br>threshold=0.7744501233100891   |
| node_204: feature_name=cg12120430 | feature_id[3727].value ><br>threshold=0.5775820016860962   |
| node_206: feature_name=cg18386876 | feature_id[4066].value ><br>threshold=0.6847257018089294   |
| node_208: feature_name=cg02053092 | feature_id[3610].value ><br>threshold=0.39507485926151276  |
| node_210: feature_name=cg10298992 | feature_id[3603].value ><br>threshold=0.5707973837852478   |
| node_228: feature_name=cg03840920 | feature_id[4524].value ><br>threshold=0.5365143716335297   |
| node_234: feature_name=cg25364972 | feature_id[1792].value ><br>threshold=0.2418053299188614   |
| node_238: feature_name=cg23485307 | feature_id[221].value ><br>threshold=0.14884746074676514   |
| node_242: feature_name=cg04873169 | feature_id[4696].value ><br>threshold=0.6058756709098816   |
| node_244: feature_name=cg17009731 | feature_id[3218].value ><br>threshold=0.6602252125740051   |
| node_246: feature_name=cg18253910 | feature_id[4458].value ><br>threshold=0.6904322504997253   |
| node_250: feature_name=cg04774476 | feature_id[1257].value ><br>threshold=0.5675267577171326   |
| node_256: feature_name=cg19259111 | feature_id[63].value ><br>threshold=0.40771469473838806    |
| node_264: feature_name=cg21483216 | feature_id[5253].value ><br>threshold=0.6332719326019287   |
| node_266: feature_name=cg04026354 | feature_id[3502].value <=<br>threshold=0.42332448065280914 |
| node_267: feature_name=cg11444072 | feature_id[116].value ><br>threshold=0.4940422773361206    |
| node_273: feature_name=cg08571020 | feature_id[381].value ><br>threshold=0.4616774618625641    |
| node_275: feature_name=cg08331427 | feature_id[2081].value ><br>threshold=0.5443233847618103   |
| node_281: feature_name=cg00216961 | feature_id[945].value ><br>threshold=0.4166988283395767    |
| node_333: feature_name=cg23366832 | feature_id[2439].value <=<br>threshold=0.8551825881004333  |
| Class: myositis proliferans (MP)  |                                                            |
| Rules_84                          | passed counts:2                                            |



|                                   |                                                           |
|-----------------------------------|-----------------------------------------------------------|
| node_0: feature_name=cg11915444   | feature_id[2002].value ><br>threshold=0.3402601182460785  |
| node_10: feature_name=cg26016985  | feature_id[4407].value ><br>threshold=0.6493876278400421  |
| node_16: feature_name=cg23157618  | feature_id[5511].value ><br>threshold=0.5759606957435608  |
| node_20: feature_name=cg10480329  | feature_id[1439].value ><br>threshold=0.5518321692943573  |
| node_48: feature_name=cg17843418  | feature_id[4868].value ><br>threshold=0.34969255328178406 |
| node_52: feature_name=cg24407065  | feature_id[4522].value ><br>threshold=0.5364363789558411  |
| node_56: feature_name=cg07281938  | feature_id[249].value ><br>threshold=0.7506992518901825   |
| node_78: feature_name=cg21759907  | feature_id[1650].value ><br>threshold=0.46823520958423615 |
| node_98: feature_name=cg10886334  | feature_id[3975].value ><br>threshold=0.43698127567768097 |
| node_102: feature_name=cg09373983 | feature_id[5025].value ><br>threshold=0.5575815737247467  |
| node_106: feature_name=cg12948116 | feature_id[5360].value <=<br>threshold=0.5658791363239288 |
| node_107: feature_name=cg21906519 | feature_id[5251].value ><br>threshold=0.6089984774589539  |
| node_111: feature_name=cg17537493 | feature_id[4217].value ><br>threshold=0.5825372636318207  |
| node_117: feature_name=cg15720017 | feature_id[4443].value ><br>threshold=0.7009969055652618  |
| node_119: feature_name=cg06038180 | feature_id[3480].value ><br>threshold=0.4583848565816879  |
| node_121: feature_name=cg08619651 | feature_id[4882].value <=<br>threshold=0.2105495035648346 |
| node_122: feature_name=cg01014262 | feature_id[1911].value <=<br>threshold=0.5327437818050385 |
| node_123: feature_name=cg16863382 | feature_id[2922].value ><br>threshold=0.7200668156147003  |
| node_133: feature_name=cg06989443 | feature_id[2327].value <=<br>threshold=0.6579365730285645 |
| node_134: feature_name=cg07344990 | feature_id[2398].value ><br>threshold=0.5562876164913177  |
| node_138: feature_name=cg02966841 | feature_id[2199].value ><br>threshold=0.7744501233100891  |
| node_204: feature_name=cg12120430 | feature_id[3727].value ><br>threshold=0.5775820016860962  |

|                                   |                                                            |
|-----------------------------------|------------------------------------------------------------|
| node_206: feature_name=cg18386876 | feature_id[4066].value ><br>threshold=0.6847257018089294   |
| node_208: feature_name=cg02053092 | feature_id[3610].value ><br>threshold=0.39507485926151276  |
| node_210: feature_name=cg10298992 | feature_id[3603].value ><br>threshold=0.5707973837852478   |
| node_228: feature_name=cg03840920 | feature_id[4524].value ><br>threshold=0.5365143716335297   |
| node_234: feature_name=cg25364972 | feature_id[1792].value ><br>threshold=0.2418053299188614   |
| node_238: feature_name=cg23485307 | feature_id[221].value ><br>threshold=0.14884746074676514   |
| node_242: feature_name=cg04873169 | feature_id[4696].value ><br>threshold=0.6058756709098816   |
| node_244: feature_name=cg17009731 | feature_id[3218].value ><br>threshold=0.6602252125740051   |
| node_246: feature_name=cg18253910 | feature_id[4458].value ><br>threshold=0.6904322504997253   |
| node_250: feature_name=cg04774476 | feature_id[1257].value ><br>threshold=0.5675267577171326   |
| node_256: feature_name=cg19259111 | feature_id[63].value ><br>threshold=0.40771469473838806    |
| node_264: feature_name=cg21483216 | feature_id[5253].value ><br>threshold=0.6332719326019287   |
| node_266: feature_name=cg04026354 | feature_id[3502].value <=<br>threshold=0.42332448065280914 |
| node_267: feature_name=cg11444072 | feature_id[116].value ><br>threshold=0.4940422773361206    |
| node_273: feature_name=cg08571020 | feature_id[381].value ><br>threshold=0.4616774618625641    |
| node_275: feature_name=cg08331427 | feature_id[2081].value ><br>threshold=0.5443233847618103   |
| node_281: feature_name=cg00216961 | feature_id[945].value <=<br>threshold=0.4166988283395767   |
| node_282: feature_name=cg04716580 | feature_id[1390].value ><br>threshold=0.4204266667366028   |
| node_286: feature_name=cg07891483 | feature_id[1877].value ><br>threshold=0.829958975315094    |
| node_288: feature_name=cg01475325 | feature_id[3969].value ><br>threshold=0.45323844254016876  |
| node_292: feature_name=cg19702397 | feature_id[2066].value ><br>threshold=0.3536848723888397   |
| node_294: feature_name=cg21936959 | feature_id[595].value ><br>threshold=0.5567200481891632    |

|                                   |                                                           |
|-----------------------------------|-----------------------------------------------------------|
| node_308: feature_name=cg18645642 | feature_id[262].value ><br>threshold=0.42608243227005005  |
| node_310: feature_name=cg27351239 | feature_id[1874].value <=<br>threshold=0.6790103316307068 |
| node_311: feature_name=cg13107973 | feature_id[1326].value <=<br>threshold=0.6562457382678986 |
| node_312: feature_name=cg10024583 | feature_id[1175].value <=<br>threshold=0.518094539642334  |
| node_313: feature_name=cg18259342 | feature_id[4480].value ><br>threshold=0.19059929996728897 |
| node_315: feature_name=cg10979364 | feature_id[992].value ><br>threshold=0.44472505152225494  |
| node_317: feature_name=cg14406727 | feature_id[815].value ><br>threshold=0.36684730648994446  |
| node_319: feature_name=cg24926689 | feature_id[2976].value ><br>threshold=0.822247177362442   |
| node_321: feature_name=cg11535638 | feature_id[2812].value ><br>threshold=0.7990793883800507  |
| Class: Kaposi sarcoma (KS)        |                                                           |
|                                   |                                                           |
| Rules_85                          | passed counts:2                                           |
| node_0: feature_name=cg11915444   | feature_id[2002].value ><br>threshold=0.3402601182460785  |
| node_10: feature_name=cg26016985  | feature_id[4407].value ><br>threshold=0.6493876278400421  |
| node_16: feature_name=cg23157618  | feature_id[5511].value ><br>threshold=0.5759606957435608  |
| node_20: feature_name=cg10480329  | feature_id[1439].value ><br>threshold=0.5518321692943573  |
| node_48: feature_name=cg17843418  | feature_id[4868].value ><br>threshold=0.34969255328178406 |
| node_52: feature_name=cg24407065  | feature_id[4522].value ><br>threshold=0.5364363789558411  |
| node_56: feature_name=cg07281938  | feature_id[249].value ><br>threshold=0.7506992518901825   |
| node_78: feature_name=cg21759907  | feature_id[1650].value ><br>threshold=0.46823520958423615 |
| node_98: feature_name=cg10886334  | feature_id[3975].value ><br>threshold=0.43698127567768097 |
| node_102: feature_name=cg09373983 | feature_id[5025].value ><br>threshold=0.5575815737247467  |
| node_106: feature_name=cg12948116 | feature_id[5360].value <=<br>threshold=0.5658791363239288 |

|                                   |                                                           |
|-----------------------------------|-----------------------------------------------------------|
| node_107: feature_name=cg21906519 | feature_id[5251].value ><br>threshold=0.6089984774589539  |
| node_111: feature_name=cg17537493 | feature_id[4217].value ><br>threshold=0.5825372636318207  |
| node_117: feature_name=cg15720017 | feature_id[4443].value ><br>threshold=0.7009969055652618  |
| node_119: feature_name=cg06038180 | feature_id[3480].value ><br>threshold=0.4583848565816879  |
| node_121: feature_name=cg08619651 | feature_id[4882].value <=<br>threshold=0.2105495035648346 |
| node_122: feature_name=cg01014262 | feature_id[1911].value <=<br>threshold=0.5327437818050385 |
| node_123: feature_name=cg16863382 | feature_id[2922].value ><br>threshold=0.7200668156147003  |
| node_133: feature_name=cg06989443 | feature_id[2327].value <=<br>threshold=0.6579365730285645 |
| node_134: feature_name=cg07344990 | feature_id[2398].value ><br>threshold=0.5562876164913177  |
| node_138: feature_name=cg02966841 | feature_id[2199].value ><br>threshold=0.7744501233100891  |
| node_204: feature_name=cg12120430 | feature_id[3727].value ><br>threshold=0.5775820016860962  |
| node_206: feature_name=cg18386876 | feature_id[4066].value ><br>threshold=0.6847257018089294  |
| node_208: feature_name=cg02053092 | feature_id[3610].value ><br>threshold=0.39507485926151276 |
| node_210: feature_name=cg10298992 | feature_id[3603].value ><br>threshold=0.5707973837852478  |
| node_228: feature_name=cg03840920 | feature_id[4524].value ><br>threshold=0.5365143716335297  |
| node_234: feature_name=cg25364972 | feature_id[1792].value ><br>threshold=0.2418053299188614  |
| node_238: feature_name=cg23485307 | feature_id[221].value ><br>threshold=0.14884746074676514  |
| node_242: feature_name=cg04873169 | feature_id[4696].value ><br>threshold=0.6058756709098816  |
| node_244: feature_name=cg17009731 | feature_id[3218].value ><br>threshold=0.6602252125740051  |
| node_246: feature_name=cg18253910 | feature_id[4458].value ><br>threshold=0.6904322504997253  |
| node_250: feature_name=cg04774476 | feature_id[1257].value ><br>threshold=0.5675267577171326  |
| node_256: feature_name=cg19259111 | feature_id[63].value ><br>threshold=0.40771469473838806   |

|                                             |                                                            |
|---------------------------------------------|------------------------------------------------------------|
| node_264: feature_name=cg21483216           | feature_id[5253].value ><br>threshold=0.6332719326019287   |
| node_266: feature_name=cg04026354           | feature_id[3502].value <=<br>threshold=0.42332448065280914 |
| node_267: feature_name=cg11444072           | feature_id[116].value ><br>threshold=0.4940422773361206    |
| node_273: feature_name=cg08571020           | feature_id[381].value ><br>threshold=0.4616774618625641    |
| node_275: feature_name=cg08331427           | feature_id[2081].value ><br>threshold=0.5443233847618103   |
| node_281: feature_name=cg00216961           | feature_id[945].value <=<br>threshold=0.4166988283395767   |
| node_282: feature_name=cg04716580           | feature_id[1390].value ><br>threshold=0.4204266667366028   |
| node_286: feature_name=cg07891483           | feature_id[1877].value ><br>threshold=0.829958975315094    |
| node_288: feature_name=cg01475325           | feature_id[3969].value ><br>threshold=0.45323844254016876  |
| node_292: feature_name=cg19702397           | feature_id[2066].value ><br>threshold=0.3536848723888397   |
| node_294: feature_name=cg21936959           | feature_id[595].value ><br>threshold=0.5567200481891632    |
| node_308: feature_name=cg18645642           | feature_id[262].value ><br>threshold=0.42608243227005005   |
| node_310: feature_name=cg27351239           | feature_id[1874].value <=<br>threshold=0.6790103316307068  |
| node_311: feature_name=cg13107973           | feature_id[1326].value <=<br>threshold=0.6562457382678986  |
| node_312: feature_name=cg10024583           | feature_id[1175].value <=<br>threshold=0.518094539642334   |
| node_313: feature_name=cg18259342           | feature_id[4480].value ><br>threshold=0.19059929996728897  |
| node_315: feature_name=cg10979364           | feature_id[992].value ><br>threshold=0.44472505152225494   |
| node_317: feature_name=cg14406727           | feature_id[815].value ><br>threshold=0.36684730648994446   |
| node_319: feature_name=cg24926689           | feature_id[2976].value <=<br>threshold=0.822247177362442   |
| Class: clear cell chondrosarcoma (CSA (CC)) |                                                            |
| Rules_86                                    | passed counts:2                                            |
| node_0: feature_name=cg11915444             | feature_id[2002].value ><br>threshold=0.3402601182460785   |

|                                   |                                                           |
|-----------------------------------|-----------------------------------------------------------|
| node_10: feature_name=cg26016985  | feature_id[4407].value ><br>threshold=0.6493876278400421  |
| node_16: feature_name=cg23157618  | feature_id[5511].value ><br>threshold=0.5759606957435608  |
| node_20: feature_name=cg10480329  | feature_id[1439].value ><br>threshold=0.5518321692943573  |
| node_48: feature_name=cg17843418  | feature_id[4868].value ><br>threshold=0.34969255328178406 |
| node_52: feature_name=cg24407065  | feature_id[4522].value ><br>threshold=0.5364363789558411  |
| node_56: feature_name=cg07281938  | feature_id[249].value ><br>threshold=0.7506992518901825   |
| node_78: feature_name=cg21759907  | feature_id[1650].value ><br>threshold=0.46823520958423615 |
| node_98: feature_name=cg10886334  | feature_id[3975].value ><br>threshold=0.43698127567768097 |
| node_102: feature_name=cg09373983 | feature_id[5025].value ><br>threshold=0.5575815737247467  |
| node_106: feature_name=cg12948116 | feature_id[5360].value <=<br>threshold=0.5658791363239288 |
| node_107: feature_name=cg21906519 | feature_id[5251].value ><br>threshold=0.6089984774589539  |
| node_111: feature_name=cg17537493 | feature_id[4217].value ><br>threshold=0.5825372636318207  |
| node_117: feature_name=cg15720017 | feature_id[4443].value ><br>threshold=0.7009969055652618  |
| node_119: feature_name=cg06038180 | feature_id[3480].value ><br>threshold=0.4583848565816879  |
| node_121: feature_name=cg08619651 | feature_id[4882].value <=<br>threshold=0.2105495035648346 |
| node_122: feature_name=cg01014262 | feature_id[1911].value <=<br>threshold=0.5327437818050385 |
| node_123: feature_name=cg16863382 | feature_id[2922].value ><br>threshold=0.7200668156147003  |
| node_133: feature_name=cg06989443 | feature_id[2327].value <=<br>threshold=0.6579365730285645 |
| node_134: feature_name=cg07344990 | feature_id[2398].value ><br>threshold=0.5562876164913177  |
| node_138: feature_name=cg02966841 | feature_id[2199].value ><br>threshold=0.7744501233100891  |
| node_204: feature_name=cg12120430 | feature_id[3727].value ><br>threshold=0.5775820016860962  |
| node_206: feature_name=cg18386876 | feature_id[4066].value ><br>threshold=0.6847257018089294  |

|                                   |                                                            |
|-----------------------------------|------------------------------------------------------------|
| node_208: feature_name=cg02053092 | feature_id[3610].value ><br>threshold=0.39507485926151276  |
| node_210: feature_name=cg10298992 | feature_id[3603].value ><br>threshold=0.5707973837852478   |
| node_228: feature_name=cg03840920 | feature_id[4524].value ><br>threshold=0.5365143716335297   |
| node_234: feature_name=cg25364972 | feature_id[1792].value ><br>threshold=0.2418053299188614   |
| node_238: feature_name=cg23485307 | feature_id[221].value ><br>threshold=0.14884746074676514   |
| node_242: feature_name=cg04873169 | feature_id[4696].value ><br>threshold=0.6058756709098816   |
| node_244: feature_name=cg17009731 | feature_id[3218].value ><br>threshold=0.6602252125740051   |
| node_246: feature_name=cg18253910 | feature_id[4458].value ><br>threshold=0.6904322504997253   |
| node_250: feature_name=cg04774476 | feature_id[1257].value ><br>threshold=0.5675267577171326   |
| node_256: feature_name=cg19259111 | feature_id[63].value ><br>threshold=0.40771469473838806    |
| node_264: feature_name=cg21483216 | feature_id[5253].value ><br>threshold=0.6332719326019287   |
| node_266: feature_name=cg04026354 | feature_id[3502].value <=<br>threshold=0.42332448065280914 |
| node_267: feature_name=cg11444072 | feature_id[116].value ><br>threshold=0.4940422773361206    |
| node_273: feature_name=cg08571020 | feature_id[381].value ><br>threshold=0.4616774618625641    |
| node_275: feature_name=cg08331427 | feature_id[2081].value ><br>threshold=0.5443233847618103   |
| node_281: feature_name=cg00216961 | feature_id[945].value <=<br>threshold=0.4166988283395767   |
| node_282: feature_name=cg04716580 | feature_id[1390].value ><br>threshold=0.4204266667366028   |
| node_286: feature_name=cg07891483 | feature_id[1877].value ><br>threshold=0.829958975315094    |
| node_288: feature_name=cg01475325 | feature_id[3969].value ><br>threshold=0.45323844254016876  |
| node_292: feature_name=cg19702397 | feature_id[2066].value ><br>threshold=0.3536848723888397   |
| node_294: feature_name=cg21936959 | feature_id[595].value ><br>threshold=0.5567200481891632    |
| node_308: feature_name=cg18645642 | feature_id[262].value ><br>threshold=0.42608243227005005   |

|                                               |                                                           |
|-----------------------------------------------|-----------------------------------------------------------|
| node_310: feature_name=cg27351239             | feature_id[1874].value <=<br>threshold=0.6790103316307068 |
| node_311: feature_name=cg13107973             | feature_id[1326].value <=<br>threshold=0.6562457382678986 |
| node_312: feature_name=cg10024583             | feature_id[1175].value <=<br>threshold=0.518094539642334  |
| node_313: feature_name=cg18259342             | feature_id[4480].value ><br>threshold=0.19059929996728897 |
| node_315: feature_name=cg10979364             | feature_id[992].value ><br>threshold=0.44472505152225494  |
| node_317: feature_name=cg14406727             | feature_id[815].value <=<br>threshold=0.36684730648994446 |
| Class: embryonal rhabdomyosarcoma (RMS (EMB)) |                                                           |
|                                               |                                                           |
| Rules_87                                      | passed counts:2                                           |
| node_0: feature_name=cg11915444               | feature_id[2002].value ><br>threshold=0.3402601182460785  |
| node_10: feature_name=cg26016985              | feature_id[4407].value ><br>threshold=0.6493876278400421  |
| node_16: feature_name=cg23157618              | feature_id[5511].value ><br>threshold=0.5759606957435608  |
| node_20: feature_name=cg10480329              | feature_id[1439].value ><br>threshold=0.5518321692943573  |
| node_48: feature_name=cg17843418              | feature_id[4868].value ><br>threshold=0.34969255328178406 |
| node_52: feature_name=cg24407065              | feature_id[4522].value ><br>threshold=0.5364363789558411  |
| node_56: feature_name=cg07281938              | feature_id[249].value ><br>threshold=0.7506992518901825   |
| node_78: feature_name=cg21759907              | feature_id[1650].value ><br>threshold=0.46823520958423615 |
| node_98: feature_name=cg10886334              | feature_id[3975].value ><br>threshold=0.43698127567768097 |
| node_102: feature_name=cg09373983             | feature_id[5025].value ><br>threshold=0.5575815737247467  |
| node_106: feature_name=cg12948116             | feature_id[5360].value <=<br>threshold=0.5658791363239288 |
| node_107: feature_name=cg21906519             | feature_id[5251].value ><br>threshold=0.6089984774589539  |
| node_111: feature_name=cg17537493             | feature_id[4217].value ><br>threshold=0.5825372636318207  |



|                                   |                                                            |
|-----------------------------------|------------------------------------------------------------|
| node_117: feature_name=cg15720017 | feature_id[4443].value ><br>threshold=0.7009969055652618   |
| node_119: feature_name=cg06038180 | feature_id[3480].value ><br>threshold=0.4583848565816879   |
| node_121: feature_name=cg08619651 | feature_id[4882].value <=<br>threshold=0.2105495035648346  |
| node_122: feature_name=cg01014262 | feature_id[1911].value <=<br>threshold=0.5327437818050385  |
| node_123: feature_name=cg16863382 | feature_id[2922].value ><br>threshold=0.7200668156147003   |
| node_133: feature_name=cg06989443 | feature_id[2327].value <=<br>threshold=0.6579365730285645  |
| node_134: feature_name=cg07344990 | feature_id[2398].value ><br>threshold=0.5562876164913177   |
| node_138: feature_name=cg02966841 | feature_id[2199].value ><br>threshold=0.7744501233100891   |
| node_204: feature_name=cg12120430 | feature_id[3727].value ><br>threshold=0.5775820016860962   |
| node_206: feature_name=cg18386876 | feature_id[4066].value ><br>threshold=0.6847257018089294   |
| node_208: feature_name=cg02053092 | feature_id[3610].value ><br>threshold=0.39507485926151276  |
| node_210: feature_name=cg10298992 | feature_id[3603].value ><br>threshold=0.5707973837852478   |
| node_228: feature_name=cg03840920 | feature_id[4524].value ><br>threshold=0.5365143716335297   |
| node_234: feature_name=cg25364972 | feature_id[1792].value ><br>threshold=0.2418053299188614   |
| node_238: feature_name=cg23485307 | feature_id[221].value ><br>threshold=0.14884746074676514   |
| node_242: feature_name=cg04873169 | feature_id[4696].value ><br>threshold=0.6058756709098816   |
| node_244: feature_name=cg17009731 | feature_id[3218].value ><br>threshold=0.6602252125740051   |
| node_246: feature_name=cg18253910 | feature_id[4458].value ><br>threshold=0.6904322504997253   |
| node_250: feature_name=cg04774476 | feature_id[1257].value ><br>threshold=0.5675267577171326   |
| node_256: feature_name=cg19259111 | feature_id[63].value ><br>threshold=0.40771469473838806    |
| node_264: feature_name=cg21483216 | feature_id[5253].value ><br>threshold=0.6332719326019287   |
| node_266: feature_name=cg04026354 | feature_id[3502].value <=<br>threshold=0.42332448065280914 |

|                                                         |                                                           |
|---------------------------------------------------------|-----------------------------------------------------------|
| node_267: feature_name=cg11444072                       | feature_id[116].value ><br>threshold=0.4940422773361206   |
| node_273: feature_name=cg08571020                       | feature_id[381].value ><br>threshold=0.4616774618625641   |
| node_275: feature_name=cg08331427                       | feature_id[2081].value ><br>threshold=0.5443233847618103  |
| node_281: feature_name=cg00216961                       | feature_id[945].value <=<br>threshold=0.4166988283395767  |
| node_282: feature_name=cg04716580                       | feature_id[1390].value ><br>threshold=0.4204266667366028  |
| node_286: feature_name=cg07891483                       | feature_id[1877].value ><br>threshold=0.829958975315094   |
| node_288: feature_name=cg01475325                       | feature_id[3969].value ><br>threshold=0.45323844254016876 |
| node_292: feature_name=cg19702397                       | feature_id[2066].value ><br>threshold=0.3536848723888397  |
| node_294: feature_name=cg21936959                       | feature_id[595].value ><br>threshold=0.5567200481891632   |
| node_308: feature_name=cg18645642                       | feature_id[262].value ><br>threshold=0.42608243227005005  |
| node_310: feature_name=cg27351239                       | feature_id[1874].value <=<br>threshold=0.6790103316307068 |
| node_311: feature_name=cg13107973                       | feature_id[1326].value <=<br>threshold=0.6562457382678986 |
| node_312: feature_name=cg10024583                       | feature_id[1175].value <=<br>threshold=0.518094539642334  |
| node_313: feature_name=cg18259342                       | feature_id[4480].value ><br>threshold=0.19059929996728897 |
| node_315: feature_name=cg10979364                       | feature_id[992].value <=<br>threshold=0.44472505152225494 |
| Class: malignant peripheral nerve sheath tumour (MPNST) |                                                           |
|                                                         |                                                           |
| Rules_88                                                | passed counts:2                                           |
| node_0: feature_name=cg11915444                         | feature_id[2002].value ><br>threshold=0.3402601182460785  |
| node_10: feature_name=cg26016985                        | feature_id[4407].value ><br>threshold=0.6493876278400421  |
| node_16: feature_name=cg23157618                        | feature_id[5511].value ><br>threshold=0.5759606957435608  |
| node_20: feature_name=cg10480329                        | feature_id[1439].value ><br>threshold=0.5518321692943573  |

|                                   |                                                           |
|-----------------------------------|-----------------------------------------------------------|
| node_48: feature_name=cg17843418  | feature_id[4868].value ><br>threshold=0.34969255328178406 |
| node_52: feature_name=cg24407065  | feature_id[4522].value ><br>threshold=0.5364363789558411  |
| node_56: feature_name=cg07281938  | feature_id[249].value ><br>threshold=0.7506992518901825   |
| node_78: feature_name=cg21759907  | feature_id[1650].value ><br>threshold=0.46823520958423615 |
| node_98: feature_name=cg10886334  | feature_id[3975].value ><br>threshold=0.43698127567768097 |
| node_102: feature_name=cg09373983 | feature_id[5025].value ><br>threshold=0.5575815737247467  |
| node_106: feature_name=cg12948116 | feature_id[5360].value <=<br>threshold=0.5658791363239288 |
| node_107: feature_name=cg21906519 | feature_id[5251].value ><br>threshold=0.6089984774589539  |
| node_111: feature_name=cg17537493 | feature_id[4217].value ><br>threshold=0.5825372636318207  |
| node_117: feature_name=cg15720017 | feature_id[4443].value ><br>threshold=0.7009969055652618  |
| node_119: feature_name=cg06038180 | feature_id[3480].value ><br>threshold=0.4583848565816879  |
| node_121: feature_name=cg08619651 | feature_id[4882].value <=<br>threshold=0.2105495035648346 |
| node_122: feature_name=cg01014262 | feature_id[1911].value <=<br>threshold=0.5327437818050385 |
| node_123: feature_name=cg16863382 | feature_id[2922].value ><br>threshold=0.7200668156147003  |
| node_133: feature_name=cg06989443 | feature_id[2327].value <=<br>threshold=0.6579365730285645 |
| node_134: feature_name=cg07344990 | feature_id[2398].value ><br>threshold=0.5562876164913177  |
| node_138: feature_name=cg02966841 | feature_id[2199].value ><br>threshold=0.7744501233100891  |
| node_204: feature_name=cg12120430 | feature_id[3727].value ><br>threshold=0.5775820016860962  |
| node_206: feature_name=cg18386876 | feature_id[4066].value ><br>threshold=0.6847257018089294  |
| node_208: feature_name=cg02053092 | feature_id[3610].value ><br>threshold=0.39507485926151276 |
| node_210: feature_name=cg10298992 | feature_id[3603].value ><br>threshold=0.5707973837852478  |
| node_228: feature_name=cg03840920 | feature_id[4524].value ><br>threshold=0.5365143716335297  |

|                                   |                                                            |
|-----------------------------------|------------------------------------------------------------|
| node_234: feature_name=cg25364972 | feature_id[1792].value ><br>threshold=0.2418053299188614   |
| node_238: feature_name=cg23485307 | feature_id[221].value ><br>threshold=0.14884746074676514   |
| node_242: feature_name=cg04873169 | feature_id[4696].value ><br>threshold=0.6058756709098816   |
| node_244: feature_name=cg17009731 | feature_id[3218].value ><br>threshold=0.6602252125740051   |
| node_246: feature_name=cg18253910 | feature_id[4458].value ><br>threshold=0.6904322504997253   |
| node_250: feature_name=cg04774476 | feature_id[1257].value ><br>threshold=0.5675267577171326   |
| node_256: feature_name=cg19259111 | feature_id[63].value ><br>threshold=0.40771469473838806    |
| node_264: feature_name=cg21483216 | feature_id[5253].value ><br>threshold=0.6332719326019287   |
| node_266: feature_name=cg04026354 | feature_id[3502].value <=<br>threshold=0.42332448065280914 |
| node_267: feature_name=cg11444072 | feature_id[116].value ><br>threshold=0.4940422773361206    |
| node_273: feature_name=cg08571020 | feature_id[381].value ><br>threshold=0.4616774618625641    |
| node_275: feature_name=cg08331427 | feature_id[2081].value ><br>threshold=0.5443233847618103   |
| node_281: feature_name=cg00216961 | feature_id[945].value <=<br>threshold=0.4166988283395767   |
| node_282: feature_name=cg04716580 | feature_id[1390].value ><br>threshold=0.4204266667366028   |
| node_286: feature_name=cg07891483 | feature_id[1877].value ><br>threshold=0.829958975315094    |
| node_288: feature_name=cg01475325 | feature_id[3969].value ><br>threshold=0.45323844254016876  |
| node_292: feature_name=cg19702397 | feature_id[2066].value ><br>threshold=0.3536848723888397   |
| node_294: feature_name=cg21936959 | feature_id[595].value ><br>threshold=0.5567200481891632    |
| node_308: feature_name=cg18645642 | feature_id[262].value ><br>threshold=0.42608243227005005   |
| node_310: feature_name=cg27351239 | feature_id[1874].value <=<br>threshold=0.6790103316307068  |
| node_311: feature_name=cg13107973 | feature_id[1326].value <=<br>threshold=0.6562457382678986  |
| node_312: feature_name=cg10024583 | feature_id[1175].value <=<br>threshold=0.518094539642334   |

|                                   |                                                            |
|-----------------------------------|------------------------------------------------------------|
| node_313: feature_name=cg18259342 | feature_id[4480].value <=<br>threshold=0.19059929996728897 |
| Class: Ewing sarcoma (EWING)      |                                                            |
| Rules_89                          | passed counts:2                                            |
| node_0: feature_name=cg11915444   | feature_id[2002].value ><br>threshold=0.3402601182460785   |
| node_10: feature_name=cg26016985  | feature_id[4407].value ><br>threshold=0.6493876278400421   |
| node_16: feature_name=cg23157618  | feature_id[5511].value ><br>threshold=0.5759606957435608   |
| node_20: feature_name=cg10480329  | feature_id[1439].value ><br>threshold=0.5518321692943573   |
| node_48: feature_name=cg17843418  | feature_id[4868].value ><br>threshold=0.34969255328178406  |
| node_52: feature_name=cg24407065  | feature_id[4522].value ><br>threshold=0.5364363789558411   |
| node_56: feature_name=cg07281938  | feature_id[249].value ><br>threshold=0.7506992518901825    |
| node_78: feature_name=cg21759907  | feature_id[1650].value ><br>threshold=0.46823520958423615  |
| node_98: feature_name=cg10886334  | feature_id[3975].value ><br>threshold=0.43698127567768097  |
| node_102: feature_name=cg09373983 | feature_id[5025].value ><br>threshold=0.5575815737247467   |
| node_106: feature_name=cg12948116 | feature_id[5360].value <=<br>threshold=0.5658791363239288  |
| node_107: feature_name=cg21906519 | feature_id[5251].value ><br>threshold=0.6089984774589539   |
| node_111: feature_name=cg17537493 | feature_id[4217].value ><br>threshold=0.5825372636318207   |
| node_117: feature_name=cg15720017 | feature_id[4443].value ><br>threshold=0.7009969055652618   |
| node_119: feature_name=cg06038180 | feature_id[3480].value ><br>threshold=0.4583848565816879   |
| node_121: feature_name=cg08619651 | feature_id[4882].value <=<br>threshold=0.2105495035648346  |
| node_122: feature_name=cg01014262 | feature_id[1911].value <=<br>threshold=0.5327437818050385  |
| node_123: feature_name=cg16863382 | feature_id[2922].value ><br>threshold=0.7200668156147003   |
| node_133: feature_name=cg06989443 | feature_id[2327].value <=<br>threshold=0.6579365730285645  |

|                                   |                                                            |
|-----------------------------------|------------------------------------------------------------|
| node_134: feature_name=cg07344990 | feature_id[2398].value ><br>threshold=0.5562876164913177   |
| node_138: feature_name=cg02966841 | feature_id[2199].value ><br>threshold=0.7744501233100891   |
| node_204: feature_name=cg12120430 | feature_id[3727].value ><br>threshold=0.5775820016860962   |
| node_206: feature_name=cg18386876 | feature_id[4066].value ><br>threshold=0.6847257018089294   |
| node_208: feature_name=cg02053092 | feature_id[3610].value ><br>threshold=0.39507485926151276  |
| node_210: feature_name=cg10298992 | feature_id[3603].value ><br>threshold=0.5707973837852478   |
| node_228: feature_name=cg03840920 | feature_id[4524].value ><br>threshold=0.5365143716335297   |
| node_234: feature_name=cg25364972 | feature_id[1792].value ><br>threshold=0.2418053299188614   |
| node_238: feature_name=cg23485307 | feature_id[221].value ><br>threshold=0.14884746074676514   |
| node_242: feature_name=cg04873169 | feature_id[4696].value ><br>threshold=0.6058756709098816   |
| node_244: feature_name=cg17009731 | feature_id[3218].value ><br>threshold=0.6602252125740051   |
| node_246: feature_name=cg18253910 | feature_id[4458].value ><br>threshold=0.6904322504997253   |
| node_250: feature_name=cg04774476 | feature_id[1257].value ><br>threshold=0.5675267577171326   |
| node_256: feature_name=cg19259111 | feature_id[63].value ><br>threshold=0.40771469473838806    |
| node_264: feature_name=cg21483216 | feature_id[5253].value ><br>threshold=0.6332719326019287   |
| node_266: feature_name=cg04026354 | feature_id[3502].value <=<br>threshold=0.42332448065280914 |
| node_267: feature_name=cg11444072 | feature_id[116].value ><br>threshold=0.4940422773361206    |
| node_273: feature_name=cg08571020 | feature_id[381].value ><br>threshold=0.4616774618625641    |
| node_275: feature_name=cg08331427 | feature_id[2081].value ><br>threshold=0.5443233847618103   |
| node_281: feature_name=cg00216961 | feature_id[945].value <=<br>threshold=0.4166988283395767   |
| node_282: feature_name=cg04716580 | feature_id[1390].value ><br>threshold=0.4204266667366028   |
| node_286: feature_name=cg07891483 | feature_id[1877].value ><br>threshold=0.829958975315094    |

|                                               |                                                           |
|-----------------------------------------------|-----------------------------------------------------------|
| node_288: feature_name=cg01475325             | feature_id[3969].value ><br>threshold=0.45323844254016876 |
| node_292: feature_name=cg19702397             | feature_id[2066].value ><br>threshold=0.3536848723888397  |
| node_294: feature_name=cg21936959             | feature_id[595].value <=<br>threshold=0.5567200481891632  |
| node_295: feature_name=cg05251593             | feature_id[515].value <=<br>threshold=0.5597732663154602  |
| node_296: feature_name=cg01343045             | feature_id[1653].value ><br>threshold=0.9222070276737213  |
| Class: gastrointestinal stromal tumour (GIST) |                                                           |
| Rules_90                                      | passed counts:2                                           |
| node_0: feature_name=cg11915444               | feature_id[2002].value ><br>threshold=0.3402601182460785  |
| node_10: feature_name=cg26016985              | feature_id[4407].value ><br>threshold=0.6493876278400421  |
| node_16: feature_name=cg23157618              | feature_id[5511].value ><br>threshold=0.5759606957435608  |
| node_20: feature_name=cg10480329              | feature_id[1439].value ><br>threshold=0.5518321692943573  |
| node_48: feature_name=cg17843418              | feature_id[4868].value ><br>threshold=0.34969255328178406 |
| node_52: feature_name=cg24407065              | feature_id[4522].value ><br>threshold=0.5364363789558411  |
| node_56: feature_name=cg07281938              | feature_id[249].value ><br>threshold=0.7506992518901825   |
| node_78: feature_name=cg21759907              | feature_id[1650].value ><br>threshold=0.46823520958423615 |
| node_98: feature_name=cg10886334              | feature_id[3975].value ><br>threshold=0.43698127567768097 |
| node_102: feature_name=cg09373983             | feature_id[5025].value ><br>threshold=0.5575815737247467  |
| node_106: feature_name=cg12948116             | feature_id[5360].value <=<br>threshold=0.5658791363239288 |
| node_107: feature_name=cg21906519             | feature_id[5251].value ><br>threshold=0.6089984774589539  |
| node_111: feature_name=cg17537493             | feature_id[4217].value ><br>threshold=0.5825372636318207  |
| node_117: feature_name=cg15720017             | feature_id[4443].value ><br>threshold=0.7009969055652618  |
| node_119: feature_name=cg06038180             | feature_id[3480].value ><br>threshold=0.4583848565816879  |

|                                   |                                                            |
|-----------------------------------|------------------------------------------------------------|
| node_121: feature_name=cg08619651 | feature_id[4882].value <=<br>threshold=0.2105495035648346  |
| node_122: feature_name=cg01014262 | feature_id[1911].value <=<br>threshold=0.5327437818050385  |
| node_123: feature_name=cg16863382 | feature_id[2922].value ><br>threshold=0.7200668156147003   |
| node_133: feature_name=cg06989443 | feature_id[2327].value <=<br>threshold=0.6579365730285645  |
| node_134: feature_name=cg07344990 | feature_id[2398].value ><br>threshold=0.5562876164913177   |
| node_138: feature_name=cg02966841 | feature_id[2199].value ><br>threshold=0.7744501233100891   |
| node_204: feature_name=cg12120430 | feature_id[3727].value ><br>threshold=0.5775820016860962   |
| node_206: feature_name=cg18386876 | feature_id[4066].value ><br>threshold=0.6847257018089294   |
| node_208: feature_name=cg02053092 | feature_id[3610].value ><br>threshold=0.39507485926151276  |
| node_210: feature_name=cg10298992 | feature_id[3603].value ><br>threshold=0.5707973837852478   |
| node_228: feature_name=cg03840920 | feature_id[4524].value ><br>threshold=0.5365143716335297   |
| node_234: feature_name=cg25364972 | feature_id[1792].value ><br>threshold=0.2418053299188614   |
| node_238: feature_name=cg23485307 | feature_id[221].value ><br>threshold=0.14884746074676514   |
| node_242: feature_name=cg04873169 | feature_id[4696].value ><br>threshold=0.6058756709098816   |
| node_244: feature_name=cg17009731 | feature_id[3218].value ><br>threshold=0.6602252125740051   |
| node_246: feature_name=cg18253910 | feature_id[4458].value ><br>threshold=0.6904322504997253   |
| node_250: feature_name=cg04774476 | feature_id[1257].value ><br>threshold=0.5675267577171326   |
| node_256: feature_name=cg19259111 | feature_id[63].value ><br>threshold=0.40771469473838806    |
| node_264: feature_name=cg21483216 | feature_id[5253].value ><br>threshold=0.6332719326019287   |
| node_266: feature_name=cg04026354 | feature_id[3502].value <=<br>threshold=0.42332448065280914 |
| node_267: feature_name=cg11444072 | feature_id[116].value ><br>threshold=0.4940422773361206    |
| node_273: feature_name=cg08571020 | feature_id[381].value ><br>threshold=0.4616774618625641    |



|                                   |                                                           |
|-----------------------------------|-----------------------------------------------------------|
| node_275: feature_name=cg08331427 | feature_id[2081].value ><br>threshold=0.5443233847618103  |
| node_281: feature_name=cg00216961 | feature_id[945].value <=<br>threshold=0.4166988283395767  |
| node_282: feature_name=cg04716580 | feature_id[1390].value ><br>threshold=0.4204266667366028  |
| node_286: feature_name=cg07891483 | feature_id[1877].value ><br>threshold=0.829958975315094   |
| node_288: feature_name=cg01475325 | feature_id[3969].value ><br>threshold=0.45323844254016876 |
| node_292: feature_name=cg19702397 | feature_id[2066].value ><br>threshold=0.3536848723888397  |
| node_294: feature_name=cg21936959 | feature_id[595].value <=<br>threshold=0.5567200481891632  |
| node_295: feature_name=cg05251593 | feature_id[515].value <=<br>threshold=0.5597732663154602  |
| node_296: feature_name=cg01343045 | feature_id[1653].value <=<br>threshold=0.9222070276737213 |
| node_297: feature_name=cg03701759 | feature_id[3914].value ><br>threshold=0.8587441444396973  |
| Class: leiomyosarcoma (LMS)       |                                                           |
| Rules_91                          | passed counts:2                                           |
| node_0: feature_name=cg11915444   | feature_id[2002].value ><br>threshold=0.3402601182460785  |
| node_10: feature_name=cg26016985  | feature_id[4407].value ><br>threshold=0.6493876278400421  |
| node_16: feature_name=cg23157618  | feature_id[5511].value ><br>threshold=0.5759606957435608  |
| node_20: feature_name=cg10480329  | feature_id[1439].value ><br>threshold=0.5518321692943573  |
| node_48: feature_name=cg17843418  | feature_id[4868].value ><br>threshold=0.34969255328178406 |
| node_52: feature_name=cg24407065  | feature_id[4522].value ><br>threshold=0.5364363789558411  |
| node_56: feature_name=cg07281938  | feature_id[249].value ><br>threshold=0.7506992518901825   |
| node_78: feature_name=cg21759907  | feature_id[1650].value ><br>threshold=0.46823520958423615 |
| node_98: feature_name=cg10886334  | feature_id[3975].value ><br>threshold=0.43698127567768097 |
| node_102: feature_name=cg09373983 | feature_id[5025].value ><br>threshold=0.5575815737247467  |

|                                   |                                                           |
|-----------------------------------|-----------------------------------------------------------|
| node_106: feature_name=cg12948116 | feature_id[5360].value <=<br>threshold=0.5658791363239288 |
| node_107: feature_name=cg21906519 | feature_id[5251].value ><br>threshold=0.6089984774589539  |
| node_111: feature_name=cg17537493 | feature_id[4217].value ><br>threshold=0.5825372636318207  |
| node_117: feature_name=cg15720017 | feature_id[4443].value ><br>threshold=0.7009969055652618  |
| node_119: feature_name=cg06038180 | feature_id[3480].value ><br>threshold=0.4583848565816879  |
| node_121: feature_name=cg08619651 | feature_id[4882].value <=<br>threshold=0.2105495035648346 |
| node_122: feature_name=cg01014262 | feature_id[1911].value <=<br>threshold=0.5327437818050385 |
| node_123: feature_name=cg16863382 | feature_id[2922].value ><br>threshold=0.7200668156147003  |
| node_133: feature_name=cg06989443 | feature_id[2327].value <=<br>threshold=0.6579365730285645 |
| node_134: feature_name=cg07344990 | feature_id[2398].value ><br>threshold=0.5562876164913177  |
| node_138: feature_name=cg02966841 | feature_id[2199].value ><br>threshold=0.7744501233100891  |
| node_204: feature_name=cg12120430 | feature_id[3727].value ><br>threshold=0.5775820016860962  |
| node_206: feature_name=cg18386876 | feature_id[4066].value ><br>threshold=0.6847257018089294  |
| node_208: feature_name=cg02053092 | feature_id[3610].value ><br>threshold=0.39507485926151276 |
| node_210: feature_name=cg10298992 | feature_id[3603].value ><br>threshold=0.5707973837852478  |
| node_228: feature_name=cg03840920 | feature_id[4524].value ><br>threshold=0.5365143716335297  |
| node_234: feature_name=cg25364972 | feature_id[1792].value ><br>threshold=0.2418053299188614  |
| node_238: feature_name=cg23485307 | feature_id[221].value ><br>threshold=0.14884746074676514  |
| node_242: feature_name=cg04873169 | feature_id[4696].value ><br>threshold=0.6058756709098816  |
| node_244: feature_name=cg17009731 | feature_id[3218].value ><br>threshold=0.6602252125740051  |
| node_246: feature_name=cg18253910 | feature_id[4458].value ><br>threshold=0.6904322504997253  |
| node_250: feature_name=cg04774476 | feature_id[1257].value ><br>threshold=0.5675267577171326  |

|                                                         |                                                            |
|---------------------------------------------------------|------------------------------------------------------------|
| node_256: feature_name=cg19259111                       | feature_id[63].value ><br>threshold=0.40771469473838806    |
| node_264: feature_name=cg21483216                       | feature_id[5253].value ><br>threshold=0.6332719326019287   |
| node_266: feature_name=cg04026354                       | feature_id[3502].value <=<br>threshold=0.42332448065280914 |
| node_267: feature_name=cg11444072                       | feature_id[116].value ><br>threshold=0.4940422773361206    |
| node_273: feature_name=cg08571020                       | feature_id[381].value ><br>threshold=0.4616774618625641    |
| node_275: feature_name=cg08331427                       | feature_id[2081].value ><br>threshold=0.5443233847618103   |
| node_281: feature_name=cg00216961                       | feature_id[945].value <=<br>threshold=0.4166988283395767   |
| node_282: feature_name=cg04716580                       | feature_id[1390].value ><br>threshold=0.4204266667366028   |
| node_286: feature_name=cg07891483                       | feature_id[1877].value ><br>threshold=0.829958975315094    |
| node_288: feature_name=cg01475325                       | feature_id[3969].value ><br>threshold=0.45323844254016876  |
| node_292: feature_name=cg19702397                       | feature_id[2066].value ><br>threshold=0.3536848723888397   |
| node_294: feature_name=cg21936959                       | feature_id[595].value <=<br>threshold=0.5567200481891632   |
| node_295: feature_name=cg05251593                       | feature_id[515].value <=<br>threshold=0.5597732663154602   |
| node_296: feature_name=cg01343045                       | feature_id[1653].value <=<br>threshold=0.9222070276737213  |
| node_297: feature_name=cg03701759                       | feature_id[3914].value <=<br>threshold=0.8587441444396973  |
| node_298: feature_name=cg12497581                       | feature_id[1864].value <=<br>threshold=0.37188364565372467 |
| Class: malignant peripheral nerve sheath tumour (MPNST) |                                                            |
|                                                         |                                                            |
| Rules_92                                                | passed counts:2                                            |
| node_0: feature_name=cg11915444                         | feature_id[2002].value ><br>threshold=0.3402601182460785   |
| node_10: feature_name=cg26016985                        | feature_id[4407].value ><br>threshold=0.6493876278400421   |
| node_16: feature_name=cg23157618                        | feature_id[5511].value ><br>threshold=0.5759606957435608   |

|                                   |                                                           |
|-----------------------------------|-----------------------------------------------------------|
| node_20: feature_name=cg10480329  | feature_id[1439].value ><br>threshold=0.5518321692943573  |
| node_48: feature_name=cg17843418  | feature_id[4868].value ><br>threshold=0.34969255328178406 |
| node_52: feature_name=cg24407065  | feature_id[4522].value ><br>threshold=0.5364363789558411  |
| node_56: feature_name=cg07281938  | feature_id[249].value ><br>threshold=0.7506992518901825   |
| node_78: feature_name=cg21759907  | feature_id[1650].value ><br>threshold=0.46823520958423615 |
| node_98: feature_name=cg10886334  | feature_id[3975].value ><br>threshold=0.43698127567768097 |
| node_102: feature_name=cg09373983 | feature_id[5025].value ><br>threshold=0.5575815737247467  |
| node_106: feature_name=cg12948116 | feature_id[5360].value <=<br>threshold=0.5658791363239288 |
| node_107: feature_name=cg21906519 | feature_id[5251].value ><br>threshold=0.6089984774589539  |
| node_111: feature_name=cg17537493 | feature_id[4217].value ><br>threshold=0.5825372636318207  |
| node_117: feature_name=cg15720017 | feature_id[4443].value ><br>threshold=0.7009969055652618  |
| node_119: feature_name=cg06038180 | feature_id[3480].value ><br>threshold=0.4583848565816879  |
| node_121: feature_name=cg08619651 | feature_id[4882].value <=<br>threshold=0.2105495035648346 |
| node_122: feature_name=cg01014262 | feature_id[1911].value <=<br>threshold=0.5327437818050385 |
| node_123: feature_name=cg16863382 | feature_id[2922].value ><br>threshold=0.7200668156147003  |
| node_133: feature_name=cg06989443 | feature_id[2327].value <=<br>threshold=0.6579365730285645 |
| node_134: feature_name=cg07344990 | feature_id[2398].value ><br>threshold=0.5562876164913177  |
| node_138: feature_name=cg02966841 | feature_id[2199].value ><br>threshold=0.7744501233100891  |
| node_204: feature_name=cg12120430 | feature_id[3727].value ><br>threshold=0.5775820016860962  |
| node_206: feature_name=cg18386876 | feature_id[4066].value ><br>threshold=0.6847257018089294  |
| node_208: feature_name=cg02053092 | feature_id[3610].value ><br>threshold=0.39507485926151276 |
| node_210: feature_name=cg10298992 | feature_id[3603].value ><br>threshold=0.5707973837852478  |

|                                   |                                                           |
|-----------------------------------|-----------------------------------------------------------|
| node_228: feature_name=cg03840920 | feature_id[4524].value ><br>threshold=0.5365143716335297  |
| node_234: feature_name=cg25364972 | feature_id[1792].value ><br>threshold=0.2418053299188614  |
| node_238: feature_name=cg23485307 | feature_id[221].value ><br>threshold=0.14884746074676514  |
| node_242: feature_name=cg04873169 | feature_id[4696].value ><br>threshold=0.6058756709098816  |
| node_244: feature_name=cg17009731 | feature_id[3218].value ><br>threshold=0.6602252125740051  |
| node_246: feature_name=cg18253910 | feature_id[4458].value ><br>threshold=0.6904322504997253  |
| node_250: feature_name=cg04774476 | feature_id[1257].value <=<br>threshold=0.5675267577171326 |
| node_251: feature_name=cg08276755 | feature_id[769].value <=<br>threshold=0.5270942002534866  |
| node_252: feature_name=cg09230938 | feature_id[163].value ><br>threshold=0.465945765376091    |
| Class: chondroblastoma (CB)       |                                                           |
|                                   |                                                           |
| Rules_93                          | passed counts:2                                           |
| node_0: feature_name=cg11915444   | feature_id[2002].value ><br>threshold=0.3402601182460785  |
| node_10: feature_name=cg26016985  | feature_id[4407].value ><br>threshold=0.6493876278400421  |
| node_16: feature_name=cg23157618  | feature_id[5511].value ><br>threshold=0.5759606957435608  |
| node_20: feature_name=cg10480329  | feature_id[1439].value ><br>threshold=0.5518321692943573  |
| node_48: feature_name=cg17843418  | feature_id[4868].value ><br>threshold=0.34969255328178406 |
| node_52: feature_name=cg24407065  | feature_id[4522].value ><br>threshold=0.5364363789558411  |
| node_56: feature_name=cg07281938  | feature_id[249].value ><br>threshold=0.7506992518901825   |
| node_78: feature_name=cg21759907  | feature_id[1650].value ><br>threshold=0.46823520958423615 |
| node_98: feature_name=cg10886334  | feature_id[3975].value ><br>threshold=0.43698127567768097 |
| node_102: feature_name=cg09373983 | feature_id[5025].value ><br>threshold=0.5575815737247467  |
| node_106: feature_name=cg12948116 | feature_id[5360].value <=<br>threshold=0.5658791363239288 |

|                                   |                                                            |
|-----------------------------------|------------------------------------------------------------|
| node_107: feature_name=cg21906519 | feature_id[5251].value ><br>threshold=0.6089984774589539   |
| node_111: feature_name=cg17537493 | feature_id[4217].value ><br>threshold=0.5825372636318207   |
| node_117: feature_name=cg15720017 | feature_id[4443].value ><br>threshold=0.7009969055652618   |
| node_119: feature_name=cg06038180 | feature_id[3480].value ><br>threshold=0.4583848565816879   |
| node_121: feature_name=cg08619651 | feature_id[4882].value <=<br>threshold=0.2105495035648346  |
| node_122: feature_name=cg01014262 | feature_id[1911].value <=<br>threshold=0.5327437818050385  |
| node_123: feature_name=cg16863382 | feature_id[2922].value ><br>threshold=0.7200668156147003   |
| node_133: feature_name=cg06989443 | feature_id[2327].value <=<br>threshold=0.6579365730285645  |
| node_134: feature_name=cg07344990 | feature_id[2398].value ><br>threshold=0.5562876164913177   |
| node_138: feature_name=cg02966841 | feature_id[2199].value ><br>threshold=0.7744501233100891   |
| node_204: feature_name=cg12120430 | feature_id[3727].value ><br>threshold=0.5775820016860962   |
| node_206: feature_name=cg18386876 | feature_id[4066].value ><br>threshold=0.6847257018089294   |
| node_208: feature_name=cg02053092 | feature_id[3610].value ><br>threshold=0.39507485926151276  |
| node_210: feature_name=cg10298992 | feature_id[3603].value <=<br>threshold=0.5707973837852478  |
| node_211: feature_name=cg02436098 | feature_id[1712].value <=<br>threshold=0.27362556010484695 |
| node_212: feature_name=cg15464763 | feature_id[2786].value ><br>threshold=0.6618955731391907   |
| node_214: feature_name=cg15264991 | feature_id[2805].value <=<br>threshold=0.701563149690628   |
| node_215: feature_name=cg04585669 | feature_id[4112].value ><br>threshold=0.2930298447608948   |
| node_217: feature_name=cg11482422 | feature_id[2778].value ><br>threshold=0.12514593824744225  |
| Class: chondroblastoma (CB)       |                                                            |
| Rules_94                          | passed counts:2                                            |
| node_0: feature_name=cg11915444   | feature_id[2002].value ><br>threshold=0.3402601182460785   |

|                                   |                                                           |
|-----------------------------------|-----------------------------------------------------------|
| node_10: feature_name=cg26016985  | feature_id[4407].value ><br>threshold=0.6493876278400421  |
| node_16: feature_name=cg23157618  | feature_id[5511].value ><br>threshold=0.5759606957435608  |
| node_20: feature_name=cg10480329  | feature_id[1439].value ><br>threshold=0.5518321692943573  |
| node_48: feature_name=cg17843418  | feature_id[4868].value ><br>threshold=0.34969255328178406 |
| node_52: feature_name=cg24407065  | feature_id[4522].value ><br>threshold=0.5364363789558411  |
| node_56: feature_name=cg07281938  | feature_id[249].value ><br>threshold=0.7506992518901825   |
| node_78: feature_name=cg21759907  | feature_id[1650].value ><br>threshold=0.46823520958423615 |
| node_98: feature_name=cg10886334  | feature_id[3975].value ><br>threshold=0.43698127567768097 |
| node_102: feature_name=cg09373983 | feature_id[5025].value ><br>threshold=0.5575815737247467  |
| node_106: feature_name=cg12948116 | feature_id[5360].value <=<br>threshold=0.5658791363239288 |
| node_107: feature_name=cg21906519 | feature_id[5251].value ><br>threshold=0.6089984774589539  |
| node_111: feature_name=cg17537493 | feature_id[4217].value ><br>threshold=0.5825372636318207  |
| node_117: feature_name=cg15720017 | feature_id[4443].value ><br>threshold=0.7009969055652618  |
| node_119: feature_name=cg06038180 | feature_id[3480].value ><br>threshold=0.4583848565816879  |
| node_121: feature_name=cg08619651 | feature_id[4882].value <=<br>threshold=0.2105495035648346 |
| node_122: feature_name=cg01014262 | feature_id[1911].value <=<br>threshold=0.5327437818050385 |
| node_123: feature_name=cg16863382 | feature_id[2922].value ><br>threshold=0.7200668156147003  |
| node_133: feature_name=cg06989443 | feature_id[2327].value <=<br>threshold=0.6579365730285645 |
| node_134: feature_name=cg07344990 | feature_id[2398].value ><br>threshold=0.5562876164913177  |
| node_138: feature_name=cg02966841 | feature_id[2199].value ><br>threshold=0.7744501233100891  |
| node_204: feature_name=cg12120430 | feature_id[3727].value ><br>threshold=0.5775820016860962  |
| node_206: feature_name=cg18386876 | feature_id[4066].value ><br>threshold=0.6847257018089294  |

|                                   |                                                            |
|-----------------------------------|------------------------------------------------------------|
| node_208: feature_name=cg02053092 | feature_id[3610].value ><br>threshold=0.39507485926151276  |
| node_210: feature_name=cg10298992 | feature_id[3603].value <=<br>threshold=0.5707973837852478  |
| node_211: feature_name=cg02436098 | feature_id[1712].value <=<br>threshold=0.27362556010484695 |
| node_212: feature_name=cg15464763 | feature_id[2786].value ><br>threshold=0.6618955731391907   |
| node_214: feature_name=cg15264991 | feature_id[2805].value <=<br>threshold=0.701563149690628   |
| node_215: feature_name=cg04585669 | feature_id[4112].value <=<br>threshold=0.2930298447608948  |
| Class: sarcoma (SARC)             |                                                            |
|                                   |                                                            |
| Rules_95                          | passed counts:2                                            |
| node_0: feature_name=cg11915444   | feature_id[2002].value ><br>threshold=0.3402601182460785   |
| node_10: feature_name=cg26016985  | feature_id[4407].value ><br>threshold=0.6493876278400421   |
| node_16: feature_name=cg23157618  | feature_id[5511].value ><br>threshold=0.5759606957435608   |
| node_20: feature_name=cg10480329  | feature_id[1439].value ><br>threshold=0.5518321692943573   |
| node_48: feature_name=cg17843418  | feature_id[4868].value ><br>threshold=0.34969255328178406  |
| node_52: feature_name=cg24407065  | feature_id[4522].value ><br>threshold=0.5364363789558411   |
| node_56: feature_name=cg07281938  | feature_id[249].value ><br>threshold=0.7506992518901825    |
| node_78: feature_name=cg21759907  | feature_id[1650].value ><br>threshold=0.46823520958423615  |
| node_98: feature_name=cg10886334  | feature_id[3975].value ><br>threshold=0.43698127567768097  |
| node_102: feature_name=cg09373983 | feature_id[5025].value ><br>threshold=0.5575815737247467   |
| node_106: feature_name=cg12948116 | feature_id[5360].value <=<br>threshold=0.5658791363239288  |
| node_107: feature_name=cg21906519 | feature_id[5251].value ><br>threshold=0.6089984774589539   |
| node_111: feature_name=cg17537493 | feature_id[4217].value ><br>threshold=0.5825372636318207   |
| node_117: feature_name=cg15720017 | feature_id[4443].value ><br>threshold=0.7009969055652618   |



|                                          |                                                           |
|------------------------------------------|-----------------------------------------------------------|
| node_119: feature_name=cg06038180        | feature_id[3480].value ><br>threshold=0.4583848565816879  |
| node_121: feature_name=cg08619651        | feature_id[4882].value <=<br>threshold=0.2105495035648346 |
| node_122: feature_name=cg01014262        | feature_id[1911].value <=<br>threshold=0.5327437818050385 |
| node_123: feature_name=cg16863382        | feature_id[2922].value ><br>threshold=0.7200668156147003  |
| node_133: feature_name=cg06989443        | feature_id[2327].value <=<br>threshold=0.6579365730285645 |
| node_134: feature_name=cg07344990        | feature_id[2398].value ><br>threshold=0.5562876164913177  |
| node_138: feature_name=cg02966841        | feature_id[2199].value <=<br>threshold=0.7744501233100891 |
| node_139: feature_name=cg06989253        | feature_id[194].value ><br>threshold=0.7899391353130341   |
| node_171: feature_name=cg07041720        | feature_id[932].value ><br>threshold=0.5004830807447433   |
| node_189: feature_name=cg19374752        | feature_id[196].value <=<br>threshold=0.6096120476722717  |
| node_190: feature_name=cg23085846        | feature_id[3499].value <=<br>threshold=0.8292354643344879 |
| node_191: feature_name=cg04508340        | feature_id[3427].value ><br>threshold=0.8703204989433289  |
| Class: alveolar soft part sarcoma (ASPS) |                                                           |
|                                          |                                                           |
| Rules_96                                 | passed counts:2                                           |
| node_0: feature_name=cg11915444          | feature_id[2002].value ><br>threshold=0.3402601182460785  |
| node_10: feature_name=cg26016985         | feature_id[4407].value ><br>threshold=0.6493876278400421  |
| node_16: feature_name=cg23157618         | feature_id[5511].value ><br>threshold=0.5759606957435608  |
| node_20: feature_name=cg10480329         | feature_id[1439].value ><br>threshold=0.5518321692943573  |
| node_48: feature_name=cg17843418         | feature_id[4868].value ><br>threshold=0.34969255328178406 |
| node_52: feature_name=cg24407065         | feature_id[4522].value ><br>threshold=0.5364363789558411  |
| node_56: feature_name=cg07281938         | feature_id[249].value ><br>threshold=0.7506992518901825   |
| node_78: feature_name=cg21759907         | feature_id[1650].value ><br>threshold=0.46823520958423615 |

|                                         |                                                           |
|-----------------------------------------|-----------------------------------------------------------|
| node_98: feature_name=cg10886334        | feature_id[3975].value ><br>threshold=0.43698127567768097 |
| node_102: feature_name=cg09373983       | feature_id[5025].value ><br>threshold=0.5575815737247467  |
| node_106: feature_name=cg12948116       | feature_id[5360].value <=<br>threshold=0.5658791363239288 |
| node_107: feature_name=cg21906519       | feature_id[5251].value ><br>threshold=0.6089984774589539  |
| node_111: feature_name=cg17537493       | feature_id[4217].value ><br>threshold=0.5825372636318207  |
| node_117: feature_name=cg15720017       | feature_id[4443].value ><br>threshold=0.7009969055652618  |
| node_119: feature_name=cg06038180       | feature_id[3480].value ><br>threshold=0.4583848565816879  |
| node_121: feature_name=cg08619651       | feature_id[4882].value <=<br>threshold=0.2105495035648346 |
| node_122: feature_name=cg01014262       | feature_id[1911].value <=<br>threshold=0.5327437818050385 |
| node_123: feature_name=cg16863382       | feature_id[2922].value ><br>threshold=0.7200668156147003  |
| node_133: feature_name=cg06989443       | feature_id[2327].value <=<br>threshold=0.6579365730285645 |
| node_134: feature_name=cg07344990       | feature_id[2398].value ><br>threshold=0.5562876164913177  |
| node_138: feature_name=cg02966841       | feature_id[2199].value <=<br>threshold=0.7744501233100891 |
| node_139: feature_name=cg06989253       | feature_id[194].value ><br>threshold=0.7899391353130341   |
| node_171: feature_name=cg07041720       | feature_id[932].value ><br>threshold=0.5004830807447433   |
| node_189: feature_name=cg19374752       | feature_id[196].value <=<br>threshold=0.6096120476722717  |
| node_190: feature_name=cg23085846       | feature_id[3499].value <=<br>threshold=0.8292354643344879 |
| node_191: feature_name=cg04508340       | feature_id[3427].value <=<br>threshold=0.8703204989433289 |
| node_192: feature_name=cg05951828       | feature_id[21].value <=<br>threshold=0.8927997946739197   |
| Class: giant cell tumour of bone (GCTB) |                                                           |
| Rules_97                                | passed counts:2                                           |
| node_0: feature_name=cg11915444         | feature_id[2002].value ><br>threshold=0.3402601182460785  |

|                                   |                                                           |
|-----------------------------------|-----------------------------------------------------------|
| node_10: feature_name=cg26016985  | feature_id[4407].value ><br>threshold=0.6493876278400421  |
| node_16: feature_name=cg23157618  | feature_id[5511].value ><br>threshold=0.5759606957435608  |
| node_20: feature_name=cg10480329  | feature_id[1439].value ><br>threshold=0.5518321692943573  |
| node_48: feature_name=cg17843418  | feature_id[4868].value ><br>threshold=0.34969255328178406 |
| node_52: feature_name=cg24407065  | feature_id[4522].value ><br>threshold=0.5364363789558411  |
| node_56: feature_name=cg07281938  | feature_id[249].value ><br>threshold=0.7506992518901825   |
| node_78: feature_name=cg21759907  | feature_id[1650].value ><br>threshold=0.46823520958423615 |
| node_98: feature_name=cg10886334  | feature_id[3975].value ><br>threshold=0.43698127567768097 |
| node_102: feature_name=cg09373983 | feature_id[5025].value ><br>threshold=0.5575815737247467  |
| node_106: feature_name=cg12948116 | feature_id[5360].value <=<br>threshold=0.5658791363239288 |
| node_107: feature_name=cg21906519 | feature_id[5251].value ><br>threshold=0.6089984774589539  |
| node_111: feature_name=cg17537493 | feature_id[4217].value ><br>threshold=0.5825372636318207  |
| node_117: feature_name=cg15720017 | feature_id[4443].value ><br>threshold=0.7009969055652618  |
| node_119: feature_name=cg06038180 | feature_id[3480].value ><br>threshold=0.4583848565816879  |
| node_121: feature_name=cg08619651 | feature_id[4882].value <=<br>threshold=0.2105495035648346 |
| node_122: feature_name=cg01014262 | feature_id[1911].value <=<br>threshold=0.5327437818050385 |
| node_123: feature_name=cg16863382 | feature_id[2922].value ><br>threshold=0.7200668156147003  |
| node_133: feature_name=cg06989443 | feature_id[2327].value <=<br>threshold=0.6579365730285645 |
| node_134: feature_name=cg07344990 | feature_id[2398].value ><br>threshold=0.5562876164913177  |
| node_138: feature_name=cg02966841 | feature_id[2199].value <=<br>threshold=0.7744501233100891 |
| node_139: feature_name=cg06989253 | feature_id[194].value ><br>threshold=0.7899391353130341   |
| node_171: feature_name=cg07041720 | feature_id[932].value <=<br>threshold=0.5004830807447433  |

|                                   |                                                           |
|-----------------------------------|-----------------------------------------------------------|
| node_172: feature_name=cg04716580 | feature_id[1390].value ><br>threshold=0.8913259208202362  |
| node_182: feature_name=cg24426483 | feature_id[3487].value <=<br>threshold=0.7537154853343964 |
| node_183: feature_name=cg14753356 | feature_id[385].value <=<br>threshold=0.3692520558834076  |
| Class: epithelioid sarcoma (ES)   |                                                           |
| Rules_98                          | passed counts:2                                           |
| node_0: feature_name=cg11915444   | feature_id[2002].value ><br>threshold=0.3402601182460785  |
| node_10: feature_name=cg26016985  | feature_id[4407].value ><br>threshold=0.6493876278400421  |
| node_16: feature_name=cg23157618  | feature_id[5511].value ><br>threshold=0.5759606957435608  |
| node_20: feature_name=cg10480329  | feature_id[1439].value ><br>threshold=0.5518321692943573  |
| node_48: feature_name=cg17843418  | feature_id[4868].value ><br>threshold=0.34969255328178406 |
| node_52: feature_name=cg24407065  | feature_id[4522].value ><br>threshold=0.5364363789558411  |
| node_56: feature_name=cg07281938  | feature_id[249].value ><br>threshold=0.7506992518901825   |
| node_78: feature_name=cg21759907  | feature_id[1650].value ><br>threshold=0.46823520958423615 |
| node_98: feature_name=cg10886334  | feature_id[3975].value ><br>threshold=0.43698127567768097 |
| node_102: feature_name=cg09373983 | feature_id[5025].value ><br>threshold=0.5575815737247467  |
| node_106: feature_name=cg12948116 | feature_id[5360].value <=<br>threshold=0.5658791363239288 |
| node_107: feature_name=cg21906519 | feature_id[5251].value ><br>threshold=0.6089984774589539  |
| node_111: feature_name=cg17537493 | feature_id[4217].value ><br>threshold=0.5825372636318207  |
| node_117: feature_name=cg15720017 | feature_id[4443].value ><br>threshold=0.7009969055652618  |
| node_119: feature_name=cg06038180 | feature_id[3480].value ><br>threshold=0.4583848565816879  |
| node_121: feature_name=cg08619651 | feature_id[4882].value <=<br>threshold=0.2105495035648346 |
| node_122: feature_name=cg01014262 | feature_id[1911].value <=<br>threshold=0.5327437818050385 |

|                                              |                                                            |
|----------------------------------------------|------------------------------------------------------------|
| node_123: feature_name=cg16863382            | feature_id[2922].value ><br>threshold=0.7200668156147003   |
| node_133: feature_name=cg06989443            | feature_id[2327].value <=<br>threshold=0.6579365730285645  |
| node_134: feature_name=cg07344990            | feature_id[2398].value ><br>threshold=0.5562876164913177   |
| node_138: feature_name=cg02966841            | feature_id[2199].value <=<br>threshold=0.7744501233100891  |
| node_139: feature_name=cg06989253            | feature_id[194].value <=<br>threshold=0.7899391353130341   |
| node_140: feature_name=cg24617568            | feature_id[3282].value <=<br>threshold=0.26932457089424133 |
| node_141: feature_name=cg12614090            | feature_id[2765].value <=<br>threshold=0.1813211366534233  |
| node_142: feature_name=cg10917602            | feature_id[4685].value <=<br>threshold=0.5744736790657043  |
| node_143: feature_name=cg23723410            | feature_id[34].value <=<br>threshold=0.3201078921556473    |
| node_144: feature_name=cg26804423            | feature_id[1725].value ><br>threshold=0.39587317407131195  |
| node_146: feature_name=cg20080282            | feature_id[1150].value <=<br>threshold=0.856019914150238   |
| node_147: feature_name=cg08924374            | feature_id[4125].value <=<br>threshold=0.07863279432058334 |
| Class: low-grade fibromyxoid sarcoma (LGFMS) |                                                            |
| Rules_99                                     | passed counts:2                                            |
| node_0: feature_name=cg11915444              | feature_id[2002].value ><br>threshold=0.3402601182460785   |
| node_10: feature_name=cg26016985             | feature_id[4407].value ><br>threshold=0.6493876278400421   |
| node_16: feature_name=cg23157618             | feature_id[5511].value ><br>threshold=0.5759606957435608   |
| node_20: feature_name=cg10480329             | feature_id[1439].value ><br>threshold=0.5518321692943573   |
| node_48: feature_name=cg17843418             | feature_id[4868].value ><br>threshold=0.34969255328178406  |
| node_52: feature_name=cg24407065             | feature_id[4522].value ><br>threshold=0.5364363789558411   |
| node_56: feature_name=cg07281938             | feature_id[249].value ><br>threshold=0.7506992518901825    |
| node_78: feature_name=cg21759907             | feature_id[1650].value ><br>threshold=0.46823520958423615  |

|                                               |                                                           |
|-----------------------------------------------|-----------------------------------------------------------|
| node_98: feature_name=cg10886334              | feature_id[3975].value ><br>threshold=0.43698127567768097 |
| node_102: feature_name=cg09373983             | feature_id[5025].value ><br>threshold=0.5575815737247467  |
| node_106: feature_name=cg12948116             | feature_id[5360].value <=<br>threshold=0.5658791363239288 |
| node_107: feature_name=cg21906519             | feature_id[5251].value ><br>threshold=0.6089984774589539  |
| node_111: feature_name=cg17537493             | feature_id[4217].value ><br>threshold=0.5825372636318207  |
| node_117: feature_name=cg15720017             | feature_id[4443].value ><br>threshold=0.7009969055652618  |
| node_119: feature_name=cg06038180             | feature_id[3480].value ><br>threshold=0.4583848565816879  |
| node_121: feature_name=cg08619651             | feature_id[4882].value <=<br>threshold=0.2105495035648346 |
| node_122: feature_name=cg01014262             | feature_id[1911].value <=<br>threshold=0.5327437818050385 |
| node_123: feature_name=cg16863382             | feature_id[2922].value <=<br>threshold=0.7200668156147003 |
| node_124: feature_name=cg11225330             | feature_id[3185].value ><br>threshold=0.7814575433731079  |
| node_126: feature_name=cg15543534             | feature_id[423].value <=<br>threshold=0.86179119348526    |
| node_127: feature_name=cg18809729             | feature_id[5184].value ><br>threshold=0.8457489907741547  |
| Class: embryonal rhabdomyosarcoma (RMS (EMB)) |                                                           |
|                                               |                                                           |
| Rules_100                                     | passed counts:2                                           |
| node_0: feature_name=cg11915444               | feature_id[2002].value ><br>threshold=0.3402601182460785  |
| node_10: feature_name=cg26016985              | feature_id[4407].value ><br>threshold=0.6493876278400421  |
| node_16: feature_name=cg23157618              | feature_id[5511].value ><br>threshold=0.5759606957435608  |
| node_20: feature_name=cg10480329              | feature_id[1439].value ><br>threshold=0.5518321692943573  |
| node_48: feature_name=cg17843418              | feature_id[4868].value ><br>threshold=0.34969255328178406 |
| node_52: feature_name=cg24407065              | feature_id[4522].value ><br>threshold=0.5364363789558411  |

|                                         |                                                           |
|-----------------------------------------|-----------------------------------------------------------|
| node_56: feature_name=cg07281938        | feature_id[249].value ><br>threshold=0.7506992518901825   |
| node_78: feature_name=cg21759907        | feature_id[1650].value ><br>threshold=0.46823520958423615 |
| node_98: feature_name=cg10886334        | feature_id[3975].value ><br>threshold=0.43698127567768097 |
| node_102: feature_name=cg09373983       | feature_id[5025].value ><br>threshold=0.5575815737247467  |
| node_106: feature_name=cg12948116       | feature_id[5360].value <=<br>threshold=0.5658791363239288 |
| node_107: feature_name=cg21906519       | feature_id[5251].value ><br>threshold=0.6089984774589539  |
| node_111: feature_name=cg17537493       | feature_id[4217].value ><br>threshold=0.5825372636318207  |
| node_117: feature_name=cg15720017       | feature_id[4443].value ><br>threshold=0.7009969055652618  |
| node_119: feature_name=cg06038180       | feature_id[3480].value ><br>threshold=0.4583848565816879  |
| node_121: feature_name=cg08619651       | feature_id[4882].value <=<br>threshold=0.2105495035648346 |
| node_122: feature_name=cg01014262       | feature_id[1911].value <=<br>threshold=0.5327437818050385 |
| node_123: feature_name=cg16863382       | feature_id[2922].value <=<br>threshold=0.7200668156147003 |
| node_124: feature_name=cg11225330       | feature_id[3185].value ><br>threshold=0.7814575433731079  |
| node_126: feature_name=cg15543534       | feature_id[423].value <=<br>threshold=0.86179119348526    |
| node_127: feature_name=cg18809729       | feature_id[5184].value <=<br>threshold=0.8457489907741547 |
| node_128: feature_name=cg20000539       | feature_id[5329].value ><br>threshold=0.7002188265323639  |
| Class: undifferentiated sarcoma (USARC) |                                                           |
| Rules_101                               | passed counts:2                                           |
| node_0: feature_name=cg11915444         | feature_id[2002].value ><br>threshold=0.3402601182460785  |
| node_10: feature_name=cg26016985        | feature_id[4407].value ><br>threshold=0.6493876278400421  |
| node_16: feature_name=cg23157618        | feature_id[5511].value ><br>threshold=0.5759606957435608  |
| node_20: feature_name=cg10480329        | feature_id[1439].value ><br>threshold=0.5518321692943573  |

|                                             |                                                            |
|---------------------------------------------|------------------------------------------------------------|
| node_48: feature_name=cg17843418            | feature_id[4868].value ><br>threshold=0.34969255328178406  |
| node_52: feature_name=cg24407065            | feature_id[4522].value ><br>threshold=0.5364363789558411   |
| node_56: feature_name=cg07281938            | feature_id[249].value ><br>threshold=0.7506992518901825    |
| node_78: feature_name=cg21759907            | feature_id[1650].value <=<br>threshold=0.46823520958423615 |
| node_79: feature_name=cg25476129            | feature_id[2302].value <=<br>threshold=0.1687404215335846  |
| node_80: feature_name=cg26362368            | feature_id[414].value <=<br>threshold=0.834072083234787    |
| node_81: feature_name=cg15881332            | feature_id[154].value <=<br>threshold=0.7577665150165558   |
| node_82: feature_name=cg14651518            | feature_id[1456].value ><br>threshold=0.7856765985488892   |
| Class: undifferentiated sarcoma (USARC)     |                                                            |
|                                             |                                                            |
| Rules_102                                   | passed counts:2                                            |
| node_0: feature_name=cg11915444             | feature_id[2002].value ><br>threshold=0.3402601182460785   |
| node_10: feature_name=cg26016985            | feature_id[4407].value ><br>threshold=0.6493876278400421   |
| node_16: feature_name=cg23157618            | feature_id[5511].value ><br>threshold=0.5759606957435608   |
| node_20: feature_name=cg10480329            | feature_id[1439].value ><br>threshold=0.5518321692943573   |
| node_48: feature_name=cg17843418            | feature_id[4868].value ><br>threshold=0.34969255328178406  |
| node_52: feature_name=cg24407065            | feature_id[4522].value ><br>threshold=0.5364363789558411   |
| node_56: feature_name=cg07281938            | feature_id[249].value <=<br>threshold=0.7506992518901825   |
| node_57: feature_name=cg21189849            | feature_id[1261].value <=<br>threshold=0.7545044124126434  |
| node_58: feature_name=cg11960033            | feature_id[260].value <=<br>threshold=0.7065970599651337   |
| node_59: feature_name=cg18148375            | feature_id[1524].value <=<br>threshold=0.6905054450035095  |
| Class: clear cell chondrosarcoma (CSA (CC)) |                                                            |
|                                             |                                                            |
| Rules_103                                   | passed counts:2                                            |



|                                                       |                                                            |
|-------------------------------------------------------|------------------------------------------------------------|
| node_0: feature_name=cg11915444                       | feature_id[2002].value ><br>threshold=0.3402601182460785   |
| node_10: feature_name=cg26016985                      | feature_id[4407].value ><br>threshold=0.6493876278400421   |
| node_16: feature_name=cg23157618                      | feature_id[5511].value ><br>threshold=0.5759606957435608   |
| node_20: feature_name=cg10480329                      | feature_id[1439].value <=<br>threshold=0.5518321692943573  |
| node_21: feature_name=cg25510609                      | feature_id[149].value <=<br>threshold=0.08151235431432724  |
| node_22: feature_name=cg23850277                      | feature_id[2159].value <=<br>threshold=0.5682950615882874  |
| node_23: feature_name=cg01259126                      | feature_id[3146].value ><br>threshold=0.34355829656124115  |
| node_25: feature_name=cg07034004                      | feature_id[3345].value <=<br>threshold=0.20594919472932816 |
| node_26: feature_name=cg12895304                      | feature_id[651].value ><br>threshold=0.9125175774097443    |
| node_28: feature_name=cg02235663                      | feature_id[785].value <=<br>threshold=0.4301222711801529   |
| Class: high-grade conventional osteosarcoma (OS (HG)) |                                                            |
|                                                       |                                                            |
| Rules_104                                             | passed counts:2                                            |
| node_0: feature_name=cg11915444                       | feature_id[2002].value ><br>threshold=0.3402601182460785   |
| node_10: feature_name=cg26016985                      | feature_id[4407].value ><br>threshold=0.6493876278400421   |
| node_16: feature_name=cg23157618                      | feature_id[5511].value ><br>threshold=0.5759606957435608   |
| node_20: feature_name=cg10480329                      | feature_id[1439].value <=<br>threshold=0.5518321692943573  |
| node_21: feature_name=cg25510609                      | feature_id[149].value <=<br>threshold=0.08151235431432724  |
| node_22: feature_name=cg23850277                      | feature_id[2159].value <=<br>threshold=0.5682950615882874  |
| node_23: feature_name=cg01259126                      | feature_id[3146].value ><br>threshold=0.34355829656124115  |
| node_25: feature_name=cg07034004                      | feature_id[3345].value <=<br>threshold=0.20594919472932816 |
| node_26: feature_name=cg12895304                      | feature_id[651].value <=<br>threshold=0.9125175774097443   |

|                                               |                                                        |
|-----------------------------------------------|--------------------------------------------------------|
| Class: mesenchymal chondrosarcoma (CSA (MES)) |                                                        |
|                                               |                                                        |
| Rules_105                                     | passed counts:2                                        |
| node_0: feature_name=cg11915444               | feature_id[2002].value <= threshold=0.3402601182460785 |
| node_1: feature_name=cg17156862               | feature_id[2598].value <= threshold=0.6409126222133636 |
| node_2: feature_name=cg08947774               | feature_id[1302].value > threshold=0.6231959313154221  |
| Class: alveolar rhabdomyosarcoma (RMS (ALV))  |                                                        |
|                                               |                                                        |
| Rules_106                                     | passed counts:1                                        |
| node_0: feature_name=cg11915444               | feature_id[2002].value > threshold=0.3402601182460785  |
| node_10: feature_name=cg26016985              | feature_id[4407].value > threshold=0.6493876278400421  |
| node_16: feature_name=cg23157618              | feature_id[5511].value > threshold=0.5759606957435608  |
| node_20: feature_name=cg10480329              | feature_id[1439].value > threshold=0.5518321692943573  |
| node_48: feature_name=cg17843418              | feature_id[4868].value > threshold=0.34969255328178406 |
| node_52: feature_name=cg24407065              | feature_id[4522].value > threshold=0.5364363789558411  |
| node_56: feature_name=cg07281938              | feature_id[249].value > threshold=0.7506992518901825   |
| node_78: feature_name=cg21759907              | feature_id[1650].value > threshold=0.46823520958423615 |
| node_98: feature_name=cg10886334              | feature_id[3975].value > threshold=0.43698127567768097 |
| node_102: feature_name=cg09373983             | feature_id[5025].value > threshold=0.5575815737247467  |
| node_106: feature_name=cg12948116             | feature_id[5360].value > threshold=0.5658791363239288  |
| node_388: feature_name=cg02855309             | feature_id[4351].value <= threshold=0.2790501043200493 |
| node_389: feature_name=cg00686915             | feature_id[1417].value > threshold=0.39021433889865875 |
| node_391: feature_name=cg02363010             | feature_id[2123].value > threshold=0.6251022964715958  |

|                                                         |                                                           |
|---------------------------------------------------------|-----------------------------------------------------------|
| Class: malignant peripheral nerve sheath tumour (MPNST) |                                                           |
|                                                         |                                                           |
| Rules_107                                               | passed counts:1                                           |
| node_0: feature_name=cg11915444                         | feature_id[2002].value ><br>threshold=0.3402601182460785  |
| node_10: feature_name=cg26016985                        | feature_id[4407].value ><br>threshold=0.6493876278400421  |
| node_16: feature_name=cg23157618                        | feature_id[5511].value ><br>threshold=0.5759606957435608  |
| node_20: feature_name=cg10480329                        | feature_id[1439].value ><br>threshold=0.5518321692943573  |
| node_48: feature_name=cg17843418                        | feature_id[4868].value ><br>threshold=0.34969255328178406 |
| node_52: feature_name=cg24407065                        | feature_id[4522].value ><br>threshold=0.5364363789558411  |
| node_56: feature_name=cg07281938                        | feature_id[249].value ><br>threshold=0.7506992518901825   |
| node_78: feature_name=cg21759907                        | feature_id[1650].value ><br>threshold=0.46823520958423615 |
| node_98: feature_name=cg10886334                        | feature_id[3975].value ><br>threshold=0.43698127567768097 |
| node_102: feature_name=cg09373983                       | feature_id[5025].value ><br>threshold=0.5575815737247467  |
| node_106: feature_name=cg12948116                       | feature_id[5360].value ><br>threshold=0.5658791363239288  |
| node_388: feature_name=cg02855309                       | feature_id[4351].value <=<br>threshold=0.2790501043200493 |
| node_389: feature_name=cg00686915                       | feature_id[1417].value ><br>threshold=0.39021433889865875 |
| node_391: feature_name=cg02363010                       | feature_id[2123].value <=<br>threshold=0.6251022964715958 |
| Class: malignant rhabdoid tumour (MRT)                  |                                                           |
|                                                         |                                                           |
| Rules_108                                               | passed counts:1                                           |
| node_0: feature_name=cg11915444                         | feature_id[2002].value ><br>threshold=0.3402601182460785  |
| node_10: feature_name=cg26016985                        | feature_id[4407].value ><br>threshold=0.6493876278400421  |
| node_16: feature_name=cg23157618                        | feature_id[5511].value ><br>threshold=0.5759606957435608  |
| node_20: feature_name=cg10480329                        | feature_id[1439].value ><br>threshold=0.5518321692943573  |

|                                               |                                                            |
|-----------------------------------------------|------------------------------------------------------------|
| node_48: feature_name=cg17843418              | feature_id[4868].value ><br>threshold=0.34969255328178406  |
| node_52: feature_name=cg24407065              | feature_id[4522].value ><br>threshold=0.5364363789558411   |
| node_56: feature_name=cg07281938              | feature_id[249].value ><br>threshold=0.7506992518901825    |
| node_78: feature_name=cg21759907              | feature_id[1650].value ><br>threshold=0.46823520958423615  |
| node_98: feature_name=cg10886334              | feature_id[3975].value ><br>threshold=0.43698127567768097  |
| node_102: feature_name=cg09373983             | feature_id[5025].value ><br>threshold=0.5575815737247467   |
| node_106: feature_name=cg12948116             | feature_id[5360].value ><br>threshold=0.5658791363239288   |
| node_388: feature_name=cg02855309             | feature_id[4351].value <=<br>threshold=0.2790501043200493  |
| node_389: feature_name=cg00686915             | feature_id[1417].value <=<br>threshold=0.39021433889865875 |
| Class: mesenchymal chondrosarcoma (CSA (MES)) |                                                            |
|                                               |                                                            |
| Rules_109                                     | passed counts:1                                            |
| node_0: feature_name=cg11915444               | feature_id[2002].value ><br>threshold=0.3402601182460785   |
| node_10: feature_name=cg26016985              | feature_id[4407].value ><br>threshold=0.6493876278400421   |
| node_16: feature_name=cg23157618              | feature_id[5511].value ><br>threshold=0.5759606957435608   |
| node_20: feature_name=cg10480329              | feature_id[1439].value ><br>threshold=0.5518321692943573   |
| node_48: feature_name=cg17843418              | feature_id[4868].value ><br>threshold=0.34969255328178406  |
| node_52: feature_name=cg24407065              | feature_id[4522].value ><br>threshold=0.5364363789558411   |
| node_56: feature_name=cg07281938              | feature_id[249].value ><br>threshold=0.7506992518901825    |
| node_78: feature_name=cg21759907              | feature_id[1650].value ><br>threshold=0.46823520958423615  |
| node_98: feature_name=cg10886334              | feature_id[3975].value ><br>threshold=0.43698127567768097  |
| node_102: feature_name=cg09373983             | feature_id[5025].value ><br>threshold=0.5575815737247467   |

|                                            |                                                           |
|--------------------------------------------|-----------------------------------------------------------|
| node_106: feature_name=cg12948116          | feature_id[5360].value <=<br>threshold=0.5658791363239288 |
| node_107: feature_name=cg21906519          | feature_id[5251].value ><br>threshold=0.6089984774589539  |
| node_111: feature_name=cg17537493          | feature_id[4217].value ><br>threshold=0.5825372636318207  |
| node_117: feature_name=cg15720017          | feature_id[4443].value ><br>threshold=0.7009969055652618  |
| node_119: feature_name=cg06038180          | feature_id[3480].value ><br>threshold=0.4583848565816879  |
| node_121: feature_name=cg08619651          | feature_id[4882].value <=<br>threshold=0.2105495035648346 |
| node_122: feature_name=cg01014262          | feature_id[1911].value ><br>threshold=0.5327437818050385  |
| node_382: feature_name=cg26240231          | feature_id[4832].value <=<br>threshold=0.9200497567653656 |
| node_383: feature_name=cg09524639          | feature_id[3704].value ><br>threshold=0.7802113592624664  |
| Class: Langerhans cell histiocytosis (LCH) |                                                           |
|                                            |                                                           |
| Rules_110                                  | passed counts:1                                           |
| node_0: feature_name=cg11915444            | feature_id[2002].value ><br>threshold=0.3402601182460785  |
| node_10: feature_name=cg26016985           | feature_id[4407].value ><br>threshold=0.6493876278400421  |
| node_16: feature_name=cg23157618           | feature_id[5511].value ><br>threshold=0.5759606957435608  |
| node_20: feature_name=cg10480329           | feature_id[1439].value ><br>threshold=0.5518321692943573  |
| node_48: feature_name=cg17843418           | feature_id[4868].value ><br>threshold=0.34969255328178406 |
| node_52: feature_name=cg24407065           | feature_id[4522].value ><br>threshold=0.5364363789558411  |
| node_56: feature_name=cg07281938           | feature_id[249].value ><br>threshold=0.7506992518901825   |
| node_78: feature_name=cg21759907           | feature_id[1650].value ><br>threshold=0.46823520958423615 |
| node_98: feature_name=cg10886334           | feature_id[3975].value ><br>threshold=0.43698127567768097 |
| node_102: feature_name=cg09373983          | feature_id[5025].value ><br>threshold=0.5575815737247467  |
| node_106: feature_name=cg12948116          | feature_id[5360].value <=<br>threshold=0.5658791363239288 |

|                                                                                   |                                                            |
|-----------------------------------------------------------------------------------|------------------------------------------------------------|
| node_107: feature_name=cg21906519                                                 | feature_id[5251].value ><br>threshold=0.6089984774589539   |
| node_111: feature_name=cg17537493                                                 | feature_id[4217].value ><br>threshold=0.5825372636318207   |
| node_117: feature_name=cg15720017                                                 | feature_id[4443].value ><br>threshold=0.7009969055652618   |
| node_119: feature_name=cg06038180                                                 | feature_id[3480].value ><br>threshold=0.4583848565816879   |
| node_121: feature_name=cg08619651                                                 | feature_id[4882].value <=<br>threshold=0.2105495035648346  |
| node_122: feature_name=cg01014262                                                 | feature_id[1911].value <=<br>threshold=0.5327437818050385  |
| node_123: feature_name=cg16863382                                                 | feature_id[2922].value ><br>threshold=0.7200668156147003   |
| node_133: feature_name=cg06989443                                                 | feature_id[2327].value ><br>threshold=0.6579365730285645   |
| node_355: feature_name=cg27470978                                                 | feature_id[4804].value ><br>threshold=0.6264137625694275   |
| node_361: feature_name=cg20252837                                                 | feature_id[420].value ><br>threshold=0.53105828166008      |
| node_363: feature_name=cg27437304                                                 | feature_id[1051].value ><br>threshold=0.7641371190547943   |
| node_365: feature_name=cg08215532                                                 | feature_id[3203].value <=<br>threshold=0.45234426856040955 |
| node_366: feature_name=cg12486498                                                 | feature_id[1977].value ><br>threshold=0.237603098154068    |
| node_368: feature_name=cg16892393                                                 | feature_id[3098].value ><br>threshold=0.13003550469875336  |
| node_370: feature_name=cg10982692                                                 | feature_id[4136].value ><br>threshold=0.8049887418746948   |
| node_372: feature_name=cg09996971                                                 | feature_id[4345].value ><br>threshold=0.5518785715103149   |
| node_374: feature_name=cg07083272                                                 | feature_id[4197].value ><br>threshold=0.7356340289115906   |
| node_376: feature_name=cg26607528                                                 | feature_id[4315].value ><br>threshold=0.8817691504955292   |
| node_378: feature_name=cg27492839                                                 | feature_id[3954].value ><br>threshold=0.8696597218513489   |
| Class: well differentiated liposarcoma (WDLS)/dedifferentiated liposarcoma (DDLs) |                                                            |
|                                                                                   |                                                            |
| Rules_111                                                                         | passed counts:1                                            |

|                                   |                                                           |
|-----------------------------------|-----------------------------------------------------------|
| node_0: feature_name=cg11915444   | feature_id[2002].value ><br>threshold=0.3402601182460785  |
| node_10: feature_name=cg26016985  | feature_id[4407].value ><br>threshold=0.6493876278400421  |
| node_16: feature_name=cg23157618  | feature_id[5511].value ><br>threshold=0.5759606957435608  |
| node_20: feature_name=cg10480329  | feature_id[1439].value ><br>threshold=0.5518321692943573  |
| node_48: feature_name=cg17843418  | feature_id[4868].value ><br>threshold=0.34969255328178406 |
| node_52: feature_name=cg24407065  | feature_id[4522].value ><br>threshold=0.5364363789558411  |
| node_56: feature_name=cg07281938  | feature_id[249].value ><br>threshold=0.7506992518901825   |
| node_78: feature_name=cg21759907  | feature_id[1650].value ><br>threshold=0.46823520958423615 |
| node_98: feature_name=cg10886334  | feature_id[3975].value ><br>threshold=0.43698127567768097 |
| node_102: feature_name=cg09373983 | feature_id[5025].value ><br>threshold=0.5575815737247467  |
| node_106: feature_name=cg12948116 | feature_id[5360].value <=<br>threshold=0.5658791363239288 |
| node_107: feature_name=cg21906519 | feature_id[5251].value ><br>threshold=0.6089984774589539  |
| node_111: feature_name=cg17537493 | feature_id[4217].value ><br>threshold=0.5825372636318207  |
| node_117: feature_name=cg15720017 | feature_id[4443].value ><br>threshold=0.7009969055652618  |
| node_119: feature_name=cg06038180 | feature_id[3480].value ><br>threshold=0.4583848565816879  |
| node_121: feature_name=cg08619651 | feature_id[4882].value <=<br>threshold=0.2105495035648346 |
| node_122: feature_name=cg01014262 | feature_id[1911].value <=<br>threshold=0.5327437818050385 |
| node_123: feature_name=cg16863382 | feature_id[2922].value ><br>threshold=0.7200668156147003  |
| node_133: feature_name=cg06989443 | feature_id[2327].value ><br>threshold=0.6579365730285645  |
| node_355: feature_name=cg27470978 | feature_id[4804].value ><br>threshold=0.6264137625694275  |
| node_361: feature_name=cg20252837 | feature_id[420].value ><br>threshold=0.53105828166008     |
| node_363: feature_name=cg27437304 | feature_id[1051].value ><br>threshold=0.7641371190547943  |

|                                                 |                                                            |
|-------------------------------------------------|------------------------------------------------------------|
| node_365: feature_name=cg08215532               | feature_id[3203].value <=<br>threshold=0.45234426856040955 |
| node_366: feature_name=cg12486498               | feature_id[1977].value ><br>threshold=0.237603098154068    |
| node_368: feature_name=cg16892393               | feature_id[3098].value ><br>threshold=0.13003550469875336  |
| node_370: feature_name=cg10982692               | feature_id[4136].value ><br>threshold=0.8049887418746948   |
| node_372: feature_name=cg09996971               | feature_id[4345].value ><br>threshold=0.5518785715103149   |
| node_374: feature_name=cg07083272               | feature_id[4197].value ><br>threshold=0.7356340289115906   |
| node_376: feature_name=cg26607528               | feature_id[4315].value ><br>threshold=0.8817691504955292   |
| node_378: feature_name=cg27492839               | feature_id[3954].value <=<br>threshold=0.8696597218513489  |
| Class: sclerosing epithelioid fibrosarcoma(SEF) |                                                            |
| Rules_112                                       | passed counts:1                                            |
| node_0: feature_name=cg11915444                 | feature_id[2002].value ><br>threshold=0.3402601182460785   |
| node_10: feature_name=cg26016985                | feature_id[4407].value ><br>threshold=0.6493876278400421   |
| node_16: feature_name=cg23157618                | feature_id[5511].value ><br>threshold=0.5759606957435608   |
| node_20: feature_name=cg10480329                | feature_id[1439].value ><br>threshold=0.5518321692943573   |
| node_48: feature_name=cg17843418                | feature_id[4868].value ><br>threshold=0.34969255328178406  |
| node_52: feature_name=cg24407065                | feature_id[4522].value ><br>threshold=0.5364363789558411   |
| node_56: feature_name=cg07281938                | feature_id[249].value ><br>threshold=0.7506992518901825    |
| node_78: feature_name=cg21759907                | feature_id[1650].value ><br>threshold=0.46823520958423615  |
| node_98: feature_name=cg10886334                | feature_id[3975].value ><br>threshold=0.43698127567768097  |
| node_102: feature_name=cg09373983               | feature_id[5025].value ><br>threshold=0.5575815737247467   |
| node_106: feature_name=cg12948116               | feature_id[5360].value <=<br>threshold=0.5658791363239288  |
| node_107: feature_name=cg21906519               | feature_id[5251].value ><br>threshold=0.6089984774589539   |



|                                        |                                                            |
|----------------------------------------|------------------------------------------------------------|
| node_111: feature_name=cg17537493      | feature_id[4217].value ><br>threshold=0.5825372636318207   |
| node_117: feature_name=cg15720017      | feature_id[4443].value ><br>threshold=0.7009969055652618   |
| node_119: feature_name=cg06038180      | feature_id[3480].value ><br>threshold=0.4583848565816879   |
| node_121: feature_name=cg08619651      | feature_id[4882].value <=<br>threshold=0.2105495035648346  |
| node_122: feature_name=cg01014262      | feature_id[1911].value <=<br>threshold=0.5327437818050385  |
| node_123: feature_name=cg16863382      | feature_id[2922].value ><br>threshold=0.7200668156147003   |
| node_133: feature_name=cg06989443      | feature_id[2327].value ><br>threshold=0.6579365730285645   |
| node_355: feature_name=cg27470978      | feature_id[4804].value ><br>threshold=0.6264137625694275   |
| node_361: feature_name=cg20252837      | feature_id[420].value ><br>threshold=0.53105828166008      |
| node_363: feature_name=cg27437304      | feature_id[1051].value ><br>threshold=0.7641371190547943   |
| node_365: feature_name=cg08215532      | feature_id[3203].value <=<br>threshold=0.45234426856040955 |
| node_366: feature_name=cg12486498      | feature_id[1977].value ><br>threshold=0.237603098154068    |
| node_368: feature_name=cg16892393      | feature_id[3098].value ><br>threshold=0.13003550469875336  |
| node_370: feature_name=cg10982692      | feature_id[4136].value ><br>threshold=0.8049887418746948   |
| node_372: feature_name=cg09996971      | feature_id[4345].value ><br>threshold=0.5518785715103149   |
| node_374: feature_name=cg07083272      | feature_id[4197].value ><br>threshold=0.7356340289115906   |
| node_376: feature_name=cg26607528      | feature_id[4315].value <=<br>threshold=0.8817691504955292  |
| Class: malignant rhabdoid tumour (MRT) |                                                            |
|                                        |                                                            |
| Rules_113                              | passed counts:1                                            |
| node_0: feature_name=cg11915444        | feature_id[2002].value ><br>threshold=0.3402601182460785   |
| node_10: feature_name=cg26016985       | feature_id[4407].value ><br>threshold=0.6493876278400421   |
| node_16: feature_name=cg23157618       | feature_id[5511].value ><br>threshold=0.5759606957435608   |

|                                   |                                                            |
|-----------------------------------|------------------------------------------------------------|
| node_20: feature_name=cg10480329  | feature_id[1439].value ><br>threshold=0.5518321692943573   |
| node_48: feature_name=cg17843418  | feature_id[4868].value ><br>threshold=0.34969255328178406  |
| node_52: feature_name=cg24407065  | feature_id[4522].value ><br>threshold=0.5364363789558411   |
| node_56: feature_name=cg07281938  | feature_id[249].value ><br>threshold=0.7506992518901825    |
| node_78: feature_name=cg21759907  | feature_id[1650].value ><br>threshold=0.46823520958423615  |
| node_98: feature_name=cg10886334  | feature_id[3975].value ><br>threshold=0.43698127567768097  |
| node_102: feature_name=cg09373983 | feature_id[5025].value ><br>threshold=0.5575815737247467   |
| node_106: feature_name=cg12948116 | feature_id[5360].value <=<br>threshold=0.5658791363239288  |
| node_107: feature_name=cg21906519 | feature_id[5251].value ><br>threshold=0.6089984774589539   |
| node_111: feature_name=cg17537493 | feature_id[4217].value ><br>threshold=0.5825372636318207   |
| node_117: feature_name=cg15720017 | feature_id[4443].value ><br>threshold=0.7009969055652618   |
| node_119: feature_name=cg06038180 | feature_id[3480].value ><br>threshold=0.4583848565816879   |
| node_121: feature_name=cg08619651 | feature_id[4882].value <=<br>threshold=0.2105495035648346  |
| node_122: feature_name=cg01014262 | feature_id[1911].value <=<br>threshold=0.5327437818050385  |
| node_123: feature_name=cg16863382 | feature_id[2922].value ><br>threshold=0.7200668156147003   |
| node_133: feature_name=cg06989443 | feature_id[2327].value ><br>threshold=0.6579365730285645   |
| node_355: feature_name=cg27470978 | feature_id[4804].value ><br>threshold=0.6264137625694275   |
| node_361: feature_name=cg20252837 | feature_id[420].value ><br>threshold=0.53105828166008      |
| node_363: feature_name=cg27437304 | feature_id[1051].value ><br>threshold=0.7641371190547943   |
| node_365: feature_name=cg08215532 | feature_id[3203].value <=<br>threshold=0.45234426856040955 |
| node_366: feature_name=cg12486498 | feature_id[1977].value ><br>threshold=0.237603098154068    |
| node_368: feature_name=cg16892393 | feature_id[3098].value ><br>threshold=0.13003550469875336  |

|                                                         |                                                           |
|---------------------------------------------------------|-----------------------------------------------------------|
| node_370: feature_name=cg10982692                       | feature_id[4136].value ><br>threshold=0.8049887418746948  |
| node_372: feature_name=cg09996971                       | feature_id[4345].value ><br>threshold=0.5518785715103149  |
| node_374: feature_name=cg07083272                       | feature_id[4197].value <=<br>threshold=0.7356340289115906 |
| Class: malignant peripheral nerve sheath tumour (MPNST) |                                                           |
| Rules_114                                               | passed counts:1                                           |
| node_0: feature_name=cg11915444                         | feature_id[2002].value ><br>threshold=0.3402601182460785  |
| node_10: feature_name=cg26016985                        | feature_id[4407].value ><br>threshold=0.6493876278400421  |
| node_16: feature_name=cg23157618                        | feature_id[5511].value ><br>threshold=0.5759606957435608  |
| node_20: feature_name=cg10480329                        | feature_id[1439].value ><br>threshold=0.5518321692943573  |
| node_48: feature_name=cg17843418                        | feature_id[4868].value ><br>threshold=0.34969255328178406 |
| node_52: feature_name=cg24407065                        | feature_id[4522].value ><br>threshold=0.5364363789558411  |
| node_56: feature_name=cg07281938                        | feature_id[249].value ><br>threshold=0.7506992518901825   |
| node_78: feature_name=cg21759907                        | feature_id[1650].value ><br>threshold=0.46823520958423615 |
| node_98: feature_name=cg10886334                        | feature_id[3975].value ><br>threshold=0.43698127567768097 |
| node_102: feature_name=cg09373983                       | feature_id[5025].value ><br>threshold=0.5575815737247467  |
| node_106: feature_name=cg12948116                       | feature_id[5360].value <=<br>threshold=0.5658791363239288 |
| node_107: feature_name=cg21906519                       | feature_id[5251].value ><br>threshold=0.6089984774589539  |
| node_111: feature_name=cg17537493                       | feature_id[4217].value ><br>threshold=0.5825372636318207  |
| node_117: feature_name=cg15720017                       | feature_id[4443].value ><br>threshold=0.7009969055652618  |
| node_119: feature_name=cg06038180                       | feature_id[3480].value ><br>threshold=0.4583848565816879  |
| node_121: feature_name=cg08619651                       | feature_id[4882].value <=<br>threshold=0.2105495035648346 |

|                                                                         |                                                            |
|-------------------------------------------------------------------------|------------------------------------------------------------|
| node_122: feature_name=cg01014262                                       | feature_id[1911].value <=<br>threshold=0.5327437818050385  |
| node_123: feature_name=cg16863382                                       | feature_id[2922].value ><br>threshold=0.7200668156147003   |
| node_133: feature_name=cg06989443                                       | feature_id[2327].value ><br>threshold=0.6579365730285645   |
| node_355: feature_name=cg27470978                                       | feature_id[4804].value ><br>threshold=0.6264137625694275   |
| node_361: feature_name=cg20252837                                       | feature_id[420].value ><br>threshold=0.53105828166008      |
| node_363: feature_name=cg27437304                                       | feature_id[1051].value ><br>threshold=0.7641371190547943   |
| node_365: feature_name=cg08215532                                       | feature_id[3203].value <=<br>threshold=0.45234426856040955 |
| node_366: feature_name=cg12486498                                       | feature_id[1977].value ><br>threshold=0.237603098154068    |
| node_368: feature_name=cg16892393                                       | feature_id[3098].value ><br>threshold=0.13003550469875336  |
| node_370: feature_name=cg10982692                                       | feature_id[4136].value ><br>threshold=0.8049887418746948   |
| node_372: feature_name=cg09996971                                       | feature_id[4345].value <=<br>threshold=0.5518785715103149  |
| Class: atypical fibroxanthoma<br>(AFX)/pleomorphic dermal sarcoma (PDS) |                                                            |
|                                                                         |                                                            |
| Rules_115                                                               | passed counts:1                                            |
| node_0: feature_name=cg11915444                                         | feature_id[2002].value ><br>threshold=0.3402601182460785   |
| node_10: feature_name=cg26016985                                        | feature_id[4407].value ><br>threshold=0.6493876278400421   |
| node_16: feature_name=cg23157618                                        | feature_id[5511].value ><br>threshold=0.5759606957435608   |
| node_20: feature_name=cg10480329                                        | feature_id[1439].value ><br>threshold=0.5518321692943573   |
| node_48: feature_name=cg17843418                                        | feature_id[4868].value ><br>threshold=0.34969255328178406  |
| node_52: feature_name=cg24407065                                        | feature_id[4522].value ><br>threshold=0.5364363789558411   |
| node_56: feature_name=cg07281938                                        | feature_id[249].value ><br>threshold=0.7506992518901825    |
| node_78: feature_name=cg21759907                                        | feature_id[1650].value ><br>threshold=0.46823520958423615  |

|                                   |                                                            |
|-----------------------------------|------------------------------------------------------------|
| node_98: feature_name=cg10886334  | feature_id[3975].value ><br>threshold=0.43698127567768097  |
| node_102: feature_name=cg09373983 | feature_id[5025].value ><br>threshold=0.5575815737247467   |
| node_106: feature_name=cg12948116 | feature_id[5360].value <=<br>threshold=0.5658791363239288  |
| node_107: feature_name=cg21906519 | feature_id[5251].value ><br>threshold=0.6089984774589539   |
| node_111: feature_name=cg17537493 | feature_id[4217].value ><br>threshold=0.5825372636318207   |
| node_117: feature_name=cg15720017 | feature_id[4443].value ><br>threshold=0.7009969055652618   |
| node_119: feature_name=cg06038180 | feature_id[3480].value ><br>threshold=0.4583848565816879   |
| node_121: feature_name=cg08619651 | feature_id[4882].value <=<br>threshold=0.2105495035648346  |
| node_122: feature_name=cg01014262 | feature_id[1911].value <=<br>threshold=0.5327437818050385  |
| node_123: feature_name=cg16863382 | feature_id[2922].value ><br>threshold=0.7200668156147003   |
| node_133: feature_name=cg06989443 | feature_id[2327].value ><br>threshold=0.6579365730285645   |
| node_355: feature_name=cg27470978 | feature_id[4804].value ><br>threshold=0.6264137625694275   |
| node_361: feature_name=cg20252837 | feature_id[420].value ><br>threshold=0.53105828166008      |
| node_363: feature_name=cg27437304 | feature_id[1051].value ><br>threshold=0.7641371190547943   |
| node_365: feature_name=cg08215532 | feature_id[3203].value <=<br>threshold=0.45234426856040955 |
| node_366: feature_name=cg12486498 | feature_id[1977].value ><br>threshold=0.237603098154068    |
| node_368: feature_name=cg16892393 | feature_id[3098].value ><br>threshold=0.13003550469875336  |
| node_370: feature_name=cg10982692 | feature_id[4136].value <=<br>threshold=0.8049887418746948  |
| Class: melanoma (MEL)             |                                                            |
|                                   |                                                            |
| Rules_116                         | passed counts:1                                            |
| node_0: feature_name=cg11915444   | feature_id[2002].value ><br>threshold=0.3402601182460785   |
| node_10: feature_name=cg26016985  | feature_id[4407].value ><br>threshold=0.6493876278400421   |

|                                   |                                                            |
|-----------------------------------|------------------------------------------------------------|
| node_16: feature_name=cg23157618  | feature_id[5511].value ><br>threshold=0.5759606957435608   |
| node_20: feature_name=cg10480329  | feature_id[1439].value ><br>threshold=0.5518321692943573   |
| node_48: feature_name=cg17843418  | feature_id[4868].value ><br>threshold=0.34969255328178406  |
| node_52: feature_name=cg24407065  | feature_id[4522].value ><br>threshold=0.5364363789558411   |
| node_56: feature_name=cg07281938  | feature_id[249].value ><br>threshold=0.7506992518901825    |
| node_78: feature_name=cg21759907  | feature_id[1650].value ><br>threshold=0.46823520958423615  |
| node_98: feature_name=cg10886334  | feature_id[3975].value ><br>threshold=0.43698127567768097  |
| node_102: feature_name=cg09373983 | feature_id[5025].value ><br>threshold=0.5575815737247467   |
| node_106: feature_name=cg12948116 | feature_id[5360].value <=<br>threshold=0.5658791363239288  |
| node_107: feature_name=cg21906519 | feature_id[5251].value ><br>threshold=0.6089984774589539   |
| node_111: feature_name=cg17537493 | feature_id[4217].value ><br>threshold=0.5825372636318207   |
| node_117: feature_name=cg15720017 | feature_id[4443].value ><br>threshold=0.7009969055652618   |
| node_119: feature_name=cg06038180 | feature_id[3480].value ><br>threshold=0.4583848565816879   |
| node_121: feature_name=cg08619651 | feature_id[4882].value <=<br>threshold=0.2105495035648346  |
| node_122: feature_name=cg01014262 | feature_id[1911].value <=<br>threshold=0.5327437818050385  |
| node_123: feature_name=cg16863382 | feature_id[2922].value ><br>threshold=0.7200668156147003   |
| node_133: feature_name=cg06989443 | feature_id[2327].value ><br>threshold=0.6579365730285645   |
| node_355: feature_name=cg27470978 | feature_id[4804].value ><br>threshold=0.6264137625694275   |
| node_361: feature_name=cg20252837 | feature_id[420].value ><br>threshold=0.53105828166008      |
| node_363: feature_name=cg27437304 | feature_id[1051].value ><br>threshold=0.7641371190547943   |
| node_365: feature_name=cg08215532 | feature_id[3203].value <=<br>threshold=0.45234426856040955 |
| node_366: feature_name=cg12486498 | feature_id[1977].value ><br>threshold=0.237603098154068    |

|                                   |                                                            |
|-----------------------------------|------------------------------------------------------------|
| node_368: feature_name=cg16892393 | feature_id[3098].value <=<br>threshold=0.13003550469875336 |
| Class: Ewing sarcoma (EWING)      |                                                            |
| Rules_117                         | passed counts:1                                            |
| node_0: feature_name=cg11915444   | feature_id[2002].value ><br>threshold=0.3402601182460785   |
| node_10: feature_name=cg26016985  | feature_id[4407].value ><br>threshold=0.6493876278400421   |
| node_16: feature_name=cg23157618  | feature_id[5511].value ><br>threshold=0.5759606957435608   |
| node_20: feature_name=cg10480329  | feature_id[1439].value ><br>threshold=0.5518321692943573   |
| node_48: feature_name=cg17843418  | feature_id[4868].value ><br>threshold=0.34969255328178406  |
| node_52: feature_name=cg24407065  | feature_id[4522].value ><br>threshold=0.5364363789558411   |
| node_56: feature_name=cg07281938  | feature_id[249].value ><br>threshold=0.7506992518901825    |
| node_78: feature_name=cg21759907  | feature_id[1650].value ><br>threshold=0.46823520958423615  |
| node_98: feature_name=cg10886334  | feature_id[3975].value ><br>threshold=0.43698127567768097  |
| node_102: feature_name=cg09373983 | feature_id[5025].value ><br>threshold=0.5575815737247467   |
| node_106: feature_name=cg12948116 | feature_id[5360].value <=<br>threshold=0.5658791363239288  |
| node_107: feature_name=cg21906519 | feature_id[5251].value ><br>threshold=0.6089984774589539   |
| node_111: feature_name=cg17537493 | feature_id[4217].value ><br>threshold=0.5825372636318207   |
| node_117: feature_name=cg15720017 | feature_id[4443].value ><br>threshold=0.7009969055652618   |
| node_119: feature_name=cg06038180 | feature_id[3480].value ><br>threshold=0.4583848565816879   |
| node_121: feature_name=cg08619651 | feature_id[4882].value <=<br>threshold=0.2105495035648346  |
| node_122: feature_name=cg01014262 | feature_id[1911].value <=<br>threshold=0.5327437818050385  |
| node_123: feature_name=cg16863382 | feature_id[2922].value ><br>threshold=0.7200668156147003   |
| node_133: feature_name=cg06989443 | feature_id[2327].value <=<br>threshold=0.6579365730285645  |

|                                                                                   |                                                           |
|-----------------------------------------------------------------------------------|-----------------------------------------------------------|
| node_134: feature_name=cg07344990                                                 | feature_id[2398].value ><br>threshold=0.5562876164913177  |
| node_138: feature_name=cg02966841                                                 | feature_id[2199].value ><br>threshold=0.7744501233100891  |
| node_204: feature_name=cg12120430                                                 | feature_id[3727].value ><br>threshold=0.5775820016860962  |
| node_206: feature_name=cg18386876                                                 | feature_id[4066].value ><br>threshold=0.6847257018089294  |
| node_208: feature_name=cg02053092                                                 | feature_id[3610].value ><br>threshold=0.39507485926151276 |
| node_210: feature_name=cg10298992                                                 | feature_id[3603].value ><br>threshold=0.5707973837852478  |
| node_228: feature_name=cg03840920                                                 | feature_id[4524].value ><br>threshold=0.5365143716335297  |
| node_234: feature_name=cg25364972                                                 | feature_id[1792].value ><br>threshold=0.2418053299188614  |
| node_238: feature_name=cg23485307                                                 | feature_id[221].value ><br>threshold=0.14884746074676514  |
| node_242: feature_name=cg04873169                                                 | feature_id[4696].value ><br>threshold=0.6058756709098816  |
| node_244: feature_name=cg17009731                                                 | feature_id[3218].value ><br>threshold=0.6602252125740051  |
| node_246: feature_name=cg18253910                                                 | feature_id[4458].value ><br>threshold=0.6904322504997253  |
| node_250: feature_name=cg04774476                                                 | feature_id[1257].value ><br>threshold=0.5675267577171326  |
| node_256: feature_name=cg19259111                                                 | feature_id[63].value ><br>threshold=0.40771469473838806   |
| node_264: feature_name=cg21483216                                                 | feature_id[5253].value ><br>threshold=0.6332719326019287  |
| node_266: feature_name=cg04026354                                                 | feature_id[3502].value ><br>threshold=0.42332448065280914 |
| node_336: feature_name=cg05824594                                                 | feature_id[1431].value <=<br>threshold=0.629401296377182  |
| node_337: feature_name=cg18475969                                                 | feature_id[2117].value ><br>threshold=0.3116971254348755  |
| node_351: feature_name=cg22286382                                                 | feature_id[2821].value ><br>threshold=0.6607459187507629  |
| Class: well differentiated liposarcoma (WDLS)/dedifferentiated liposarcoma (DDLs) |                                                           |
|                                                                                   |                                                           |
| Rules_118                                                                         | passed counts:1                                           |



|                                   |                                                           |
|-----------------------------------|-----------------------------------------------------------|
| node_0: feature_name=cg11915444   | feature_id[2002].value ><br>threshold=0.3402601182460785  |
| node_10: feature_name=cg26016985  | feature_id[4407].value ><br>threshold=0.6493876278400421  |
| node_16: feature_name=cg23157618  | feature_id[5511].value ><br>threshold=0.5759606957435608  |
| node_20: feature_name=cg10480329  | feature_id[1439].value ><br>threshold=0.5518321692943573  |
| node_48: feature_name=cg17843418  | feature_id[4868].value ><br>threshold=0.34969255328178406 |
| node_52: feature_name=cg24407065  | feature_id[4522].value ><br>threshold=0.5364363789558411  |
| node_56: feature_name=cg07281938  | feature_id[249].value ><br>threshold=0.7506992518901825   |
| node_78: feature_name=cg21759907  | feature_id[1650].value ><br>threshold=0.46823520958423615 |
| node_98: feature_name=cg10886334  | feature_id[3975].value ><br>threshold=0.43698127567768097 |
| node_102: feature_name=cg09373983 | feature_id[5025].value ><br>threshold=0.5575815737247467  |
| node_106: feature_name=cg12948116 | feature_id[5360].value <=<br>threshold=0.5658791363239288 |
| node_107: feature_name=cg21906519 | feature_id[5251].value ><br>threshold=0.6089984774589539  |
| node_111: feature_name=cg17537493 | feature_id[4217].value ><br>threshold=0.5825372636318207  |
| node_117: feature_name=cg15720017 | feature_id[4443].value ><br>threshold=0.7009969055652618  |
| node_119: feature_name=cg06038180 | feature_id[3480].value ><br>threshold=0.4583848565816879  |
| node_121: feature_name=cg08619651 | feature_id[4882].value <=<br>threshold=0.2105495035648346 |
| node_122: feature_name=cg01014262 | feature_id[1911].value <=<br>threshold=0.5327437818050385 |
| node_123: feature_name=cg16863382 | feature_id[2922].value ><br>threshold=0.7200668156147003  |
| node_133: feature_name=cg06989443 | feature_id[2327].value <=<br>threshold=0.6579365730285645 |
| node_134: feature_name=cg07344990 | feature_id[2398].value ><br>threshold=0.5562876164913177  |
| node_138: feature_name=cg02966841 | feature_id[2199].value ><br>threshold=0.7744501233100891  |
| node_204: feature_name=cg12120430 | feature_id[3727].value ><br>threshold=0.5775820016860962  |

|                                               |                                                           |
|-----------------------------------------------|-----------------------------------------------------------|
| node_206: feature_name=cg18386876             | feature_id[4066].value ><br>threshold=0.6847257018089294  |
| node_208: feature_name=cg02053092             | feature_id[3610].value ><br>threshold=0.39507485926151276 |
| node_210: feature_name=cg10298992             | feature_id[3603].value ><br>threshold=0.5707973837852478  |
| node_228: feature_name=cg03840920             | feature_id[4524].value ><br>threshold=0.5365143716335297  |
| node_234: feature_name=cg25364972             | feature_id[1792].value ><br>threshold=0.2418053299188614  |
| node_238: feature_name=cg23485307             | feature_id[221].value ><br>threshold=0.14884746074676514  |
| node_242: feature_name=cg04873169             | feature_id[4696].value ><br>threshold=0.6058756709098816  |
| node_244: feature_name=cg17009731             | feature_id[3218].value ><br>threshold=0.6602252125740051  |
| node_246: feature_name=cg18253910             | feature_id[4458].value ><br>threshold=0.6904322504997253  |
| node_250: feature_name=cg04774476             | feature_id[1257].value ><br>threshold=0.5675267577171326  |
| node_256: feature_name=cg19259111             | feature_id[63].value ><br>threshold=0.40771469473838806   |
| node_264: feature_name=cg21483216             | feature_id[5253].value ><br>threshold=0.6332719326019287  |
| node_266: feature_name=cg04026354             | feature_id[3502].value ><br>threshold=0.42332448065280914 |
| node_336: feature_name=cg05824594             | feature_id[1431].value <=<br>threshold=0.629401296377182  |
| node_337: feature_name=cg18475969             | feature_id[2117].value <=<br>threshold=0.3116971254348755 |
| node_338: feature_name=cg19494591             | feature_id[2196].value ><br>threshold=0.7268106639385223  |
| node_340: feature_name=cg09075515             | feature_id[1529].value ><br>threshold=0.5144184827804565  |
| node_342: feature_name=cg09322899             | feature_id[2281].value <=<br>threshold=0.9401540160179138 |
| node_343: feature_name=cg19382919             | feature_id[4392].value ><br>threshold=0.0787786990404129  |
| node_345: feature_name=cg06371044             | feature_id[2455].value ><br>threshold=0.7931062579154968  |
| node_347: feature_name=cg27470978             | feature_id[4804].value ><br>threshold=0.8740440309047699  |
| Class: angiomatoid fibrous histiocytoma (AFH) |                                                           |

|                                   |                                                           |
|-----------------------------------|-----------------------------------------------------------|
| Rules_119                         | passed counts:1                                           |
| node_0: feature_name=cg11915444   | feature_id[2002].value ><br>threshold=0.3402601182460785  |
| node_10: feature_name=cg26016985  | feature_id[4407].value ><br>threshold=0.6493876278400421  |
| node_16: feature_name=cg23157618  | feature_id[5511].value ><br>threshold=0.5759606957435608  |
| node_20: feature_name=cg10480329  | feature_id[1439].value ><br>threshold=0.5518321692943573  |
| node_48: feature_name=cg17843418  | feature_id[4868].value ><br>threshold=0.34969255328178406 |
| node_52: feature_name=cg24407065  | feature_id[4522].value ><br>threshold=0.5364363789558411  |
| node_56: feature_name=cg07281938  | feature_id[249].value ><br>threshold=0.7506992518901825   |
| node_78: feature_name=cg21759907  | feature_id[1650].value ><br>threshold=0.46823520958423615 |
| node_98: feature_name=cg10886334  | feature_id[3975].value ><br>threshold=0.43698127567768097 |
| node_102: feature_name=cg09373983 | feature_id[5025].value ><br>threshold=0.5575815737247467  |
| node_106: feature_name=cg12948116 | feature_id[5360].value <=<br>threshold=0.5658791363239288 |
| node_107: feature_name=cg21906519 | feature_id[5251].value ><br>threshold=0.6089984774589539  |
| node_111: feature_name=cg17537493 | feature_id[4217].value ><br>threshold=0.5825372636318207  |
| node_117: feature_name=cg15720017 | feature_id[4443].value ><br>threshold=0.7009969055652618  |
| node_119: feature_name=cg06038180 | feature_id[3480].value ><br>threshold=0.4583848565816879  |
| node_121: feature_name=cg08619651 | feature_id[4882].value <=<br>threshold=0.2105495035648346 |
| node_122: feature_name=cg01014262 | feature_id[1911].value <=<br>threshold=0.5327437818050385 |
| node_123: feature_name=cg16863382 | feature_id[2922].value ><br>threshold=0.7200668156147003  |
| node_133: feature_name=cg06989443 | feature_id[2327].value <=<br>threshold=0.6579365730285645 |
| node_134: feature_name=cg07344990 | feature_id[2398].value ><br>threshold=0.5562876164913177  |

|                                   |                                                           |
|-----------------------------------|-----------------------------------------------------------|
| node_138: feature_name=cg02966841 | feature_id[2199].value ><br>threshold=0.7744501233100891  |
| node_204: feature_name=cg12120430 | feature_id[3727].value ><br>threshold=0.5775820016860962  |
| node_206: feature_name=cg18386876 | feature_id[4066].value ><br>threshold=0.6847257018089294  |
| node_208: feature_name=cg02053092 | feature_id[3610].value ><br>threshold=0.39507485926151276 |
| node_210: feature_name=cg10298992 | feature_id[3603].value ><br>threshold=0.5707973837852478  |
| node_228: feature_name=cg03840920 | feature_id[4524].value ><br>threshold=0.5365143716335297  |
| node_234: feature_name=cg25364972 | feature_id[1792].value ><br>threshold=0.2418053299188614  |
| node_238: feature_name=cg23485307 | feature_id[221].value ><br>threshold=0.14884746074676514  |
| node_242: feature_name=cg04873169 | feature_id[4696].value ><br>threshold=0.6058756709098816  |
| node_244: feature_name=cg17009731 | feature_id[3218].value ><br>threshold=0.6602252125740051  |
| node_246: feature_name=cg18253910 | feature_id[4458].value ><br>threshold=0.6904322504997253  |
| node_250: feature_name=cg04774476 | feature_id[1257].value ><br>threshold=0.5675267577171326  |
| node_256: feature_name=cg19259111 | feature_id[63].value ><br>threshold=0.40771469473838806   |
| node_264: feature_name=cg21483216 | feature_id[5253].value ><br>threshold=0.6332719326019287  |
| node_266: feature_name=cg04026354 | feature_id[3502].value ><br>threshold=0.42332448065280914 |
| node_336: feature_name=cg05824594 | feature_id[1431].value <=<br>threshold=0.629401296377182  |
| node_337: feature_name=cg18475969 | feature_id[2117].value <=<br>threshold=0.3116971254348755 |
| node_338: feature_name=cg19494591 | feature_id[2196].value ><br>threshold=0.7268106639385223  |
| node_340: feature_name=cg09075515 | feature_id[1529].value ><br>threshold=0.5144184827804565  |
| node_342: feature_name=cg09322899 | feature_id[2281].value <=<br>threshold=0.9401540160179138 |
| node_343: feature_name=cg19382919 | feature_id[4392].value ><br>threshold=0.0787786990404129  |
| node_345: feature_name=cg06371044 | feature_id[2455].value ><br>threshold=0.7931062579154968  |

|                                         |                                                           |
|-----------------------------------------|-----------------------------------------------------------|
| node_347: feature_name=cg27470978       | feature_id[4804].value <=<br>threshold=0.8740440309047699 |
| Class: giant cell tumour of bone (GCTB) |                                                           |
| Rules_120                               | passed counts:1                                           |
| node_0: feature_name=cg11915444         | feature_id[2002].value ><br>threshold=0.3402601182460785  |
| node_10: feature_name=cg26016985        | feature_id[4407].value ><br>threshold=0.6493876278400421  |
| node_16: feature_name=cg23157618        | feature_id[5511].value ><br>threshold=0.5759606957435608  |
| node_20: feature_name=cg10480329        | feature_id[1439].value ><br>threshold=0.5518321692943573  |
| node_48: feature_name=cg17843418        | feature_id[4868].value ><br>threshold=0.34969255328178406 |
| node_52: feature_name=cg24407065        | feature_id[4522].value ><br>threshold=0.5364363789558411  |
| node_56: feature_name=cg07281938        | feature_id[249].value ><br>threshold=0.7506992518901825   |
| node_78: feature_name=cg21759907        | feature_id[1650].value ><br>threshold=0.46823520958423615 |
| node_98: feature_name=cg10886334        | feature_id[3975].value ><br>threshold=0.43698127567768097 |
| node_102: feature_name=cg09373983       | feature_id[5025].value ><br>threshold=0.5575815737247467  |
| node_106: feature_name=cg12948116       | feature_id[5360].value <=<br>threshold=0.5658791363239288 |
| node_107: feature_name=cg21906519       | feature_id[5251].value ><br>threshold=0.6089984774589539  |
| node_111: feature_name=cg17537493       | feature_id[4217].value ><br>threshold=0.5825372636318207  |
| node_117: feature_name=cg15720017       | feature_id[4443].value ><br>threshold=0.7009969055652618  |
| node_119: feature_name=cg06038180       | feature_id[3480].value ><br>threshold=0.4583848565816879  |
| node_121: feature_name=cg08619651       | feature_id[4882].value <=<br>threshold=0.2105495035648346 |
| node_122: feature_name=cg01014262       | feature_id[1911].value <=<br>threshold=0.5327437818050385 |
| node_123: feature_name=cg16863382       | feature_id[2922].value ><br>threshold=0.7200668156147003  |
| node_133: feature_name=cg06989443       | feature_id[2327].value <=<br>threshold=0.6579365730285645 |

|                                   |                                                           |
|-----------------------------------|-----------------------------------------------------------|
| node_134: feature_name=cg07344990 | feature_id[2398].value ><br>threshold=0.5562876164913177  |
| node_138: feature_name=cg02966841 | feature_id[2199].value ><br>threshold=0.7744501233100891  |
| node_204: feature_name=cg12120430 | feature_id[3727].value ><br>threshold=0.5775820016860962  |
| node_206: feature_name=cg18386876 | feature_id[4066].value ><br>threshold=0.6847257018089294  |
| node_208: feature_name=cg02053092 | feature_id[3610].value ><br>threshold=0.39507485926151276 |
| node_210: feature_name=cg10298992 | feature_id[3603].value ><br>threshold=0.5707973837852478  |
| node_228: feature_name=cg03840920 | feature_id[4524].value ><br>threshold=0.5365143716335297  |
| node_234: feature_name=cg25364972 | feature_id[1792].value ><br>threshold=0.2418053299188614  |
| node_238: feature_name=cg23485307 | feature_id[221].value ><br>threshold=0.14884746074676514  |
| node_242: feature_name=cg04873169 | feature_id[4696].value ><br>threshold=0.6058756709098816  |
| node_244: feature_name=cg17009731 | feature_id[3218].value ><br>threshold=0.6602252125740051  |
| node_246: feature_name=cg18253910 | feature_id[4458].value ><br>threshold=0.6904322504997253  |
| node_250: feature_name=cg04774476 | feature_id[1257].value ><br>threshold=0.5675267577171326  |
| node_256: feature_name=cg19259111 | feature_id[63].value ><br>threshold=0.40771469473838806   |
| node_264: feature_name=cg21483216 | feature_id[5253].value ><br>threshold=0.6332719326019287  |
| node_266: feature_name=cg04026354 | feature_id[3502].value ><br>threshold=0.42332448065280914 |
| node_336: feature_name=cg05824594 | feature_id[1431].value <=<br>threshold=0.629401296377182  |
| node_337: feature_name=cg18475969 | feature_id[2117].value <=<br>threshold=0.3116971254348755 |
| node_338: feature_name=cg19494591 | feature_id[2196].value ><br>threshold=0.7268106639385223  |
| node_340: feature_name=cg09075515 | feature_id[1529].value ><br>threshold=0.5144184827804565  |
| node_342: feature_name=cg09322899 | feature_id[2281].value <=<br>threshold=0.9401540160179138 |
| node_343: feature_name=cg19382919 | feature_id[4392].value ><br>threshold=0.0787786990404129  |

|                                   |                                                           |
|-----------------------------------|-----------------------------------------------------------|
| node_345: feature_name=cg06371044 | feature_id[2455].value <=<br>threshold=0.7931062579154968 |
| Class: sarcoma (SARC)             |                                                           |
| Rules_121                         | passed counts:1                                           |
| node_0: feature_name=cg11915444   | feature_id[2002].value ><br>threshold=0.3402601182460785  |
| node_10: feature_name=cg26016985  | feature_id[4407].value ><br>threshold=0.6493876278400421  |
| node_16: feature_name=cg23157618  | feature_id[5511].value ><br>threshold=0.5759606957435608  |
| node_20: feature_name=cg10480329  | feature_id[1439].value ><br>threshold=0.5518321692943573  |
| node_48: feature_name=cg17843418  | feature_id[4868].value ><br>threshold=0.34969255328178406 |
| node_52: feature_name=cg24407065  | feature_id[4522].value ><br>threshold=0.5364363789558411  |
| node_56: feature_name=cg07281938  | feature_id[249].value ><br>threshold=0.7506992518901825   |
| node_78: feature_name=cg21759907  | feature_id[1650].value ><br>threshold=0.46823520958423615 |
| node_98: feature_name=cg10886334  | feature_id[3975].value ><br>threshold=0.43698127567768097 |
| node_102: feature_name=cg09373983 | feature_id[5025].value ><br>threshold=0.5575815737247467  |
| node_106: feature_name=cg12948116 | feature_id[5360].value <=<br>threshold=0.5658791363239288 |
| node_107: feature_name=cg21906519 | feature_id[5251].value ><br>threshold=0.6089984774589539  |
| node_111: feature_name=cg17537493 | feature_id[4217].value ><br>threshold=0.5825372636318207  |
| node_117: feature_name=cg15720017 | feature_id[4443].value ><br>threshold=0.7009969055652618  |
| node_119: feature_name=cg06038180 | feature_id[3480].value ><br>threshold=0.4583848565816879  |
| node_121: feature_name=cg08619651 | feature_id[4882].value <=<br>threshold=0.2105495035648346 |
| node_122: feature_name=cg01014262 | feature_id[1911].value <=<br>threshold=0.5327437818050385 |
| node_123: feature_name=cg16863382 | feature_id[2922].value ><br>threshold=0.7200668156147003  |
| node_133: feature_name=cg06989443 | feature_id[2327].value <=<br>threshold=0.6579365730285645 |

|                                   |                                                           |
|-----------------------------------|-----------------------------------------------------------|
| node_134: feature_name=cg07344990 | feature_id[2398].value ><br>threshold=0.5562876164913177  |
| node_138: feature_name=cg02966841 | feature_id[2199].value ><br>threshold=0.7744501233100891  |
| node_204: feature_name=cg12120430 | feature_id[3727].value ><br>threshold=0.5775820016860962  |
| node_206: feature_name=cg18386876 | feature_id[4066].value ><br>threshold=0.6847257018089294  |
| node_208: feature_name=cg02053092 | feature_id[3610].value ><br>threshold=0.39507485926151276 |
| node_210: feature_name=cg10298992 | feature_id[3603].value ><br>threshold=0.5707973837852478  |
| node_228: feature_name=cg03840920 | feature_id[4524].value ><br>threshold=0.5365143716335297  |
| node_234: feature_name=cg25364972 | feature_id[1792].value ><br>threshold=0.2418053299188614  |
| node_238: feature_name=cg23485307 | feature_id[221].value ><br>threshold=0.14884746074676514  |
| node_242: feature_name=cg04873169 | feature_id[4696].value ><br>threshold=0.6058756709098816  |
| node_244: feature_name=cg17009731 | feature_id[3218].value ><br>threshold=0.6602252125740051  |
| node_246: feature_name=cg18253910 | feature_id[4458].value ><br>threshold=0.6904322504997253  |
| node_250: feature_name=cg04774476 | feature_id[1257].value ><br>threshold=0.5675267577171326  |
| node_256: feature_name=cg19259111 | feature_id[63].value ><br>threshold=0.40771469473838806   |
| node_264: feature_name=cg21483216 | feature_id[5253].value ><br>threshold=0.6332719326019287  |
| node_266: feature_name=cg04026354 | feature_id[3502].value ><br>threshold=0.42332448065280914 |
| node_336: feature_name=cg05824594 | feature_id[1431].value <=<br>threshold=0.629401296377182  |
| node_337: feature_name=cg18475969 | feature_id[2117].value <=<br>threshold=0.3116971254348755 |
| node_338: feature_name=cg19494591 | feature_id[2196].value ><br>threshold=0.7268106639385223  |
| node_340: feature_name=cg09075515 | feature_id[1529].value ><br>threshold=0.5144184827804565  |
| node_342: feature_name=cg09322899 | feature_id[2281].value <=<br>threshold=0.9401540160179138 |
| node_343: feature_name=cg19382919 | feature_id[4392].value <=<br>threshold=0.0787786990404129 |



|                                   |                                                           |
|-----------------------------------|-----------------------------------------------------------|
| Class: angiosarcoma (AS)          |                                                           |
| Rules_122                         | passed counts:1                                           |
| node_0: feature_name=cg11915444   | feature_id[2002].value ><br>threshold=0.3402601182460785  |
| node_10: feature_name=cg26016985  | feature_id[4407].value ><br>threshold=0.6493876278400421  |
| node_16: feature_name=cg23157618  | feature_id[5511].value ><br>threshold=0.5759606957435608  |
| node_20: feature_name=cg10480329  | feature_id[1439].value ><br>threshold=0.5518321692943573  |
| node_48: feature_name=cg17843418  | feature_id[4868].value ><br>threshold=0.34969255328178406 |
| node_52: feature_name=cg24407065  | feature_id[4522].value ><br>threshold=0.5364363789558411  |
| node_56: feature_name=cg07281938  | feature_id[249].value ><br>threshold=0.7506992518901825   |
| node_78: feature_name=cg21759907  | feature_id[1650].value ><br>threshold=0.46823520958423615 |
| node_98: feature_name=cg10886334  | feature_id[3975].value ><br>threshold=0.43698127567768097 |
| node_102: feature_name=cg09373983 | feature_id[5025].value ><br>threshold=0.5575815737247467  |
| node_106: feature_name=cg12948116 | feature_id[5360].value <=<br>threshold=0.5658791363239288 |
| node_107: feature_name=cg21906519 | feature_id[5251].value ><br>threshold=0.6089984774589539  |
| node_111: feature_name=cg17537493 | feature_id[4217].value ><br>threshold=0.5825372636318207  |
| node_117: feature_name=cg15720017 | feature_id[4443].value ><br>threshold=0.7009969055652618  |
| node_119: feature_name=cg06038180 | feature_id[3480].value ><br>threshold=0.4583848565816879  |
| node_121: feature_name=cg08619651 | feature_id[4882].value <=<br>threshold=0.2105495035648346 |
| node_122: feature_name=cg01014262 | feature_id[1911].value <=<br>threshold=0.5327437818050385 |
| node_123: feature_name=cg16863382 | feature_id[2922].value ><br>threshold=0.7200668156147003  |
| node_133: feature_name=cg06989443 | feature_id[2327].value <=<br>threshold=0.6579365730285645 |
| node_134: feature_name=cg07344990 | feature_id[2398].value ><br>threshold=0.5562876164913177  |

|                                   |                                                            |
|-----------------------------------|------------------------------------------------------------|
| node_138: feature_name=cg02966841 | feature_id[2199].value ><br>threshold=0.7744501233100891   |
| node_204: feature_name=cg12120430 | feature_id[3727].value ><br>threshold=0.5775820016860962   |
| node_206: feature_name=cg18386876 | feature_id[4066].value ><br>threshold=0.6847257018089294   |
| node_208: feature_name=cg02053092 | feature_id[3610].value ><br>threshold=0.39507485926151276  |
| node_210: feature_name=cg10298992 | feature_id[3603].value ><br>threshold=0.5707973837852478   |
| node_228: feature_name=cg03840920 | feature_id[4524].value ><br>threshold=0.5365143716335297   |
| node_234: feature_name=cg25364972 | feature_id[1792].value ><br>threshold=0.2418053299188614   |
| node_238: feature_name=cg23485307 | feature_id[221].value ><br>threshold=0.14884746074676514   |
| node_242: feature_name=cg04873169 | feature_id[4696].value ><br>threshold=0.6058756709098816   |
| node_244: feature_name=cg17009731 | feature_id[3218].value ><br>threshold=0.6602252125740051   |
| node_246: feature_name=cg18253910 | feature_id[4458].value ><br>threshold=0.6904322504997253   |
| node_250: feature_name=cg04774476 | feature_id[1257].value ><br>threshold=0.5675267577171326   |
| node_256: feature_name=cg19259111 | feature_id[63].value ><br>threshold=0.40771469473838806    |
| node_264: feature_name=cg21483216 | feature_id[5253].value ><br>threshold=0.6332719326019287   |
| node_266: feature_name=cg04026354 | feature_id[3502].value <=<br>threshold=0.42332448065280914 |
| node_267: feature_name=cg11444072 | feature_id[116].value ><br>threshold=0.4940422773361206    |
| node_273: feature_name=cg08571020 | feature_id[381].value ><br>threshold=0.4616774618625641    |
| node_275: feature_name=cg08331427 | feature_id[2081].value ><br>threshold=0.5443233847618103   |
| node_281: feature_name=cg00216961 | feature_id[945].value <=<br>threshold=0.4166988283395767   |
| node_282: feature_name=cg04716580 | feature_id[1390].value ><br>threshold=0.4204266667366028   |
| node_286: feature_name=cg07891483 | feature_id[1877].value ><br>threshold=0.829958975315094    |
| node_288: feature_name=cg01475325 | feature_id[3969].value ><br>threshold=0.45323844254016876  |

|                                   |                                                           |
|-----------------------------------|-----------------------------------------------------------|
| node_292: feature_name=cg19702397 | feature_id[2066].value ><br>threshold=0.3536848723888397  |
| node_294: feature_name=cg21936959 | feature_id[595].value ><br>threshold=0.5567200481891632   |
| node_308: feature_name=cg18645642 | feature_id[262].value ><br>threshold=0.42608243227005005  |
| node_310: feature_name=cg27351239 | feature_id[1874].value ><br>threshold=0.6790103316307068  |
| node_330: feature_name=cg18252102 | feature_id[1205].value ><br>threshold=0.5534502267837524  |
| Class: Ewing sarcoma (EWING)      |                                                           |
| Rules_123                         | passed counts:1                                           |
| node_0: feature_name=cg11915444   | feature_id[2002].value ><br>threshold=0.3402601182460785  |
| node_10: feature_name=cg26016985  | feature_id[4407].value ><br>threshold=0.6493876278400421  |
| node_16: feature_name=cg23157618  | feature_id[5511].value ><br>threshold=0.5759606957435608  |
| node_20: feature_name=cg10480329  | feature_id[1439].value ><br>threshold=0.5518321692943573  |
| node_48: feature_name=cg17843418  | feature_id[4868].value ><br>threshold=0.34969255328178406 |
| node_52: feature_name=cg24407065  | feature_id[4522].value ><br>threshold=0.5364363789558411  |
| node_56: feature_name=cg07281938  | feature_id[249].value ><br>threshold=0.7506992518901825   |
| node_78: feature_name=cg21759907  | feature_id[1650].value ><br>threshold=0.46823520958423615 |
| node_98: feature_name=cg10886334  | feature_id[3975].value ><br>threshold=0.43698127567768097 |
| node_102: feature_name=cg09373983 | feature_id[5025].value ><br>threshold=0.5575815737247467  |
| node_106: feature_name=cg12948116 | feature_id[5360].value <=<br>threshold=0.5658791363239288 |
| node_107: feature_name=cg21906519 | feature_id[5251].value ><br>threshold=0.6089984774589539  |
| node_111: feature_name=cg17537493 | feature_id[4217].value ><br>threshold=0.5825372636318207  |
| node_117: feature_name=cg15720017 | feature_id[4443].value ><br>threshold=0.7009969055652618  |
| node_119: feature_name=cg06038180 | feature_id[3480].value ><br>threshold=0.4583848565816879  |

|                                   |                                                            |
|-----------------------------------|------------------------------------------------------------|
| node_121: feature_name=cg08619651 | feature_id[4882].value <=<br>threshold=0.2105495035648346  |
| node_122: feature_name=cg01014262 | feature_id[1911].value <=<br>threshold=0.5327437818050385  |
| node_123: feature_name=cg16863382 | feature_id[2922].value ><br>threshold=0.7200668156147003   |
| node_133: feature_name=cg06989443 | feature_id[2327].value <=<br>threshold=0.6579365730285645  |
| node_134: feature_name=cg07344990 | feature_id[2398].value ><br>threshold=0.5562876164913177   |
| node_138: feature_name=cg02966841 | feature_id[2199].value ><br>threshold=0.7744501233100891   |
| node_204: feature_name=cg12120430 | feature_id[3727].value ><br>threshold=0.5775820016860962   |
| node_206: feature_name=cg18386876 | feature_id[4066].value ><br>threshold=0.6847257018089294   |
| node_208: feature_name=cg02053092 | feature_id[3610].value ><br>threshold=0.39507485926151276  |
| node_210: feature_name=cg10298992 | feature_id[3603].value ><br>threshold=0.5707973837852478   |
| node_228: feature_name=cg03840920 | feature_id[4524].value ><br>threshold=0.5365143716335297   |
| node_234: feature_name=cg25364972 | feature_id[1792].value ><br>threshold=0.2418053299188614   |
| node_238: feature_name=cg23485307 | feature_id[221].value ><br>threshold=0.14884746074676514   |
| node_242: feature_name=cg04873169 | feature_id[4696].value ><br>threshold=0.6058756709098816   |
| node_244: feature_name=cg17009731 | feature_id[3218].value ><br>threshold=0.6602252125740051   |
| node_246: feature_name=cg18253910 | feature_id[4458].value ><br>threshold=0.6904322504997253   |
| node_250: feature_name=cg04774476 | feature_id[1257].value ><br>threshold=0.5675267577171326   |
| node_256: feature_name=cg19259111 | feature_id[63].value ><br>threshold=0.40771469473838806    |
| node_264: feature_name=cg21483216 | feature_id[5253].value ><br>threshold=0.6332719326019287   |
| node_266: feature_name=cg04026354 | feature_id[3502].value <=<br>threshold=0.42332448065280914 |
| node_267: feature_name=cg11444072 | feature_id[116].value ><br>threshold=0.4940422773361206    |
| node_273: feature_name=cg08571020 | feature_id[381].value ><br>threshold=0.4616774618625641    |

|                                          |                                                           |
|------------------------------------------|-----------------------------------------------------------|
| node_275: feature_name=cg08331427        | feature_id[2081].value ><br>threshold=0.5443233847618103  |
| node_281: feature_name=cg00216961        | feature_id[945].value <=<br>threshold=0.4166988283395767  |
| node_282: feature_name=cg04716580        | feature_id[1390].value ><br>threshold=0.4204266667366028  |
| node_286: feature_name=cg07891483        | feature_id[1877].value ><br>threshold=0.829958975315094   |
| node_288: feature_name=cg01475325        | feature_id[3969].value ><br>threshold=0.45323844254016876 |
| node_292: feature_name=cg19702397        | feature_id[2066].value ><br>threshold=0.3536848723888397  |
| node_294: feature_name=cg21936959        | feature_id[595].value ><br>threshold=0.5567200481891632   |
| node_308: feature_name=cg18645642        | feature_id[262].value ><br>threshold=0.42608243227005005  |
| node_310: feature_name=cg27351239        | feature_id[1874].value <=<br>threshold=0.6790103316307068 |
| node_311: feature_name=cg13107973        | feature_id[1326].value <=<br>threshold=0.6562457382678986 |
| node_312: feature_name=cg10024583        | feature_id[1175].value <=<br>threshold=0.518094539642334  |
| node_313: feature_name=cg18259342        | feature_id[4480].value ><br>threshold=0.19059929996728897 |
| node_315: feature_name=cg10979364        | feature_id[992].value ><br>threshold=0.44472505152225494  |
| node_317: feature_name=cg14406727        | feature_id[815].value ><br>threshold=0.36684730648994446  |
| node_319: feature_name=cg24926689        | feature_id[2976].value ><br>threshold=0.822247177362442   |
| node_321: feature_name=cg11535638        | feature_id[2812].value <=<br>threshold=0.7990793883800507 |
| node_322: feature_name=cg13039539        | feature_id[4333].value ><br>threshold=0.8452905118465424  |
| node_324: feature_name=cg09956907        | feature_id[5470].value ><br>threshold=0.16951685398817062 |
| Class: alveolar soft part sarcoma (ASPS) |                                                           |
|                                          |                                                           |
| Rules_124                                | passed counts:1                                           |
| node_0: feature_name=cg11915444          | feature_id[2002].value ><br>threshold=0.3402601182460785  |
| node_10: feature_name=cg26016985         | feature_id[4407].value ><br>threshold=0.6493876278400421  |

|                                   |                                                           |
|-----------------------------------|-----------------------------------------------------------|
| node_16: feature_name=cg23157618  | feature_id[5511].value ><br>threshold=0.5759606957435608  |
| node_20: feature_name=cg10480329  | feature_id[1439].value ><br>threshold=0.5518321692943573  |
| node_48: feature_name=cg17843418  | feature_id[4868].value ><br>threshold=0.34969255328178406 |
| node_52: feature_name=cg24407065  | feature_id[4522].value ><br>threshold=0.5364363789558411  |
| node_56: feature_name=cg07281938  | feature_id[249].value ><br>threshold=0.7506992518901825   |
| node_78: feature_name=cg21759907  | feature_id[1650].value ><br>threshold=0.46823520958423615 |
| node_98: feature_name=cg10886334  | feature_id[3975].value ><br>threshold=0.43698127567768097 |
| node_102: feature_name=cg09373983 | feature_id[5025].value ><br>threshold=0.5575815737247467  |
| node_106: feature_name=cg12948116 | feature_id[5360].value <=<br>threshold=0.5658791363239288 |
| node_107: feature_name=cg21906519 | feature_id[5251].value ><br>threshold=0.6089984774589539  |
| node_111: feature_name=cg17537493 | feature_id[4217].value ><br>threshold=0.5825372636318207  |
| node_117: feature_name=cg15720017 | feature_id[4443].value ><br>threshold=0.7009969055652618  |
| node_119: feature_name=cg06038180 | feature_id[3480].value ><br>threshold=0.4583848565816879  |
| node_121: feature_name=cg08619651 | feature_id[4882].value <=<br>threshold=0.2105495035648346 |
| node_122: feature_name=cg01014262 | feature_id[1911].value <=<br>threshold=0.5327437818050385 |
| node_123: feature_name=cg16863382 | feature_id[2922].value ><br>threshold=0.7200668156147003  |
| node_133: feature_name=cg06989443 | feature_id[2327].value <=<br>threshold=0.6579365730285645 |
| node_134: feature_name=cg07344990 | feature_id[2398].value ><br>threshold=0.5562876164913177  |
| node_138: feature_name=cg02966841 | feature_id[2199].value ><br>threshold=0.7744501233100891  |
| node_204: feature_name=cg12120430 | feature_id[3727].value ><br>threshold=0.5775820016860962  |
| node_206: feature_name=cg18386876 | feature_id[4066].value ><br>threshold=0.6847257018089294  |
| node_208: feature_name=cg02053092 | feature_id[3610].value ><br>threshold=0.39507485926151276 |

|                                   |                                                            |
|-----------------------------------|------------------------------------------------------------|
| node_210: feature_name=cg10298992 | feature_id[3603].value ><br>threshold=0.5707973837852478   |
| node_228: feature_name=cg03840920 | feature_id[4524].value ><br>threshold=0.5365143716335297   |
| node_234: feature_name=cg25364972 | feature_id[1792].value ><br>threshold=0.2418053299188614   |
| node_238: feature_name=cg23485307 | feature_id[221].value ><br>threshold=0.14884746074676514   |
| node_242: feature_name=cg04873169 | feature_id[4696].value ><br>threshold=0.6058756709098816   |
| node_244: feature_name=cg17009731 | feature_id[3218].value ><br>threshold=0.6602252125740051   |
| node_246: feature_name=cg18253910 | feature_id[4458].value ><br>threshold=0.6904322504997253   |
| node_250: feature_name=cg04774476 | feature_id[1257].value ><br>threshold=0.5675267577171326   |
| node_256: feature_name=cg19259111 | feature_id[63].value ><br>threshold=0.40771469473838806    |
| node_264: feature_name=cg21483216 | feature_id[5253].value ><br>threshold=0.6332719326019287   |
| node_266: feature_name=cg04026354 | feature_id[3502].value <=<br>threshold=0.42332448065280914 |
| node_267: feature_name=cg11444072 | feature_id[116].value ><br>threshold=0.4940422773361206    |
| node_273: feature_name=cg08571020 | feature_id[381].value ><br>threshold=0.4616774618625641    |
| node_275: feature_name=cg08331427 | feature_id[2081].value ><br>threshold=0.5443233847618103   |
| node_281: feature_name=cg00216961 | feature_id[945].value <=<br>threshold=0.4166988283395767   |
| node_282: feature_name=cg04716580 | feature_id[1390].value ><br>threshold=0.4204266667366028   |
| node_286: feature_name=cg07891483 | feature_id[1877].value ><br>threshold=0.829958975315094    |
| node_288: feature_name=cg01475325 | feature_id[3969].value ><br>threshold=0.45323844254016876  |
| node_292: feature_name=cg19702397 | feature_id[2066].value ><br>threshold=0.3536848723888397   |
| node_294: feature_name=cg21936959 | feature_id[595].value ><br>threshold=0.5567200481891632    |
| node_308: feature_name=cg18645642 | feature_id[262].value ><br>threshold=0.42608243227005005   |
| node_310: feature_name=cg27351239 | feature_id[1874].value <=<br>threshold=0.6790103316307068  |

|                                     |                                                            |
|-------------------------------------|------------------------------------------------------------|
| node_311: feature_name=cg13107973   | feature_id[1326].value <=<br>threshold=0.6562457382678986  |
| node_312: feature_name=cg10024583   | feature_id[1175].value <=<br>threshold=0.518094539642334   |
| node_313: feature_name=cg18259342   | feature_id[4480].value ><br>threshold=0.19059929996728897  |
| node_315: feature_name=cg10979364   | feature_id[992].value ><br>threshold=0.44472505152225494   |
| node_317: feature_name=cg14406727   | feature_id[815].value ><br>threshold=0.36684730648994446   |
| node_319: feature_name=cg24926689   | feature_id[2976].value ><br>threshold=0.822247177362442    |
| node_321: feature_name=cg11535638   | feature_id[2812].value <=<br>threshold=0.7990793883800507  |
| node_322: feature_name=cg13039539   | feature_id[4333].value ><br>threshold=0.8452905118465424   |
| node_324: feature_name=cg09956907   | feature_id[5470].value <=<br>threshold=0.16951685398817062 |
| Class: infantile fibrosarcoma (IFS) |                                                            |
|                                     |                                                            |
| Rules_125                           | passed counts:1                                            |
| node_0: feature_name=cg11915444     | feature_id[2002].value ><br>threshold=0.3402601182460785   |
| node_10: feature_name=cg26016985    | feature_id[4407].value ><br>threshold=0.6493876278400421   |
| node_16: feature_name=cg23157618    | feature_id[5511].value ><br>threshold=0.5759606957435608   |
| node_20: feature_name=cg10480329    | feature_id[1439].value ><br>threshold=0.5518321692943573   |
| node_48: feature_name=cg17843418    | feature_id[4868].value ><br>threshold=0.34969255328178406  |
| node_52: feature_name=cg24407065    | feature_id[4522].value ><br>threshold=0.5364363789558411   |
| node_56: feature_name=cg07281938    | feature_id[249].value ><br>threshold=0.7506992518901825    |
| node_78: feature_name=cg21759907    | feature_id[1650].value ><br>threshold=0.46823520958423615  |
| node_98: feature_name=cg10886334    | feature_id[3975].value ><br>threshold=0.43698127567768097  |
| node_102: feature_name=cg09373983   | feature_id[5025].value ><br>threshold=0.5575815737247467   |
| node_106: feature_name=cg12948116   | feature_id[5360].value <=<br>threshold=0.5658791363239288  |



|                                   |                                                           |
|-----------------------------------|-----------------------------------------------------------|
| node_107: feature_name=cg21906519 | feature_id[5251].value ><br>threshold=0.6089984774589539  |
| node_111: feature_name=cg17537493 | feature_id[4217].value ><br>threshold=0.5825372636318207  |
| node_117: feature_name=cg15720017 | feature_id[4443].value ><br>threshold=0.7009969055652618  |
| node_119: feature_name=cg06038180 | feature_id[3480].value ><br>threshold=0.4583848565816879  |
| node_121: feature_name=cg08619651 | feature_id[4882].value <=<br>threshold=0.2105495035648346 |
| node_122: feature_name=cg01014262 | feature_id[1911].value <=<br>threshold=0.5327437818050385 |
| node_123: feature_name=cg16863382 | feature_id[2922].value ><br>threshold=0.7200668156147003  |
| node_133: feature_name=cg06989443 | feature_id[2327].value <=<br>threshold=0.6579365730285645 |
| node_134: feature_name=cg07344990 | feature_id[2398].value ><br>threshold=0.5562876164913177  |
| node_138: feature_name=cg02966841 | feature_id[2199].value ><br>threshold=0.7744501233100891  |
| node_204: feature_name=cg12120430 | feature_id[3727].value ><br>threshold=0.5775820016860962  |
| node_206: feature_name=cg18386876 | feature_id[4066].value ><br>threshold=0.6847257018089294  |
| node_208: feature_name=cg02053092 | feature_id[3610].value ><br>threshold=0.39507485926151276 |
| node_210: feature_name=cg10298992 | feature_id[3603].value ><br>threshold=0.5707973837852478  |
| node_228: feature_name=cg03840920 | feature_id[4524].value ><br>threshold=0.5365143716335297  |
| node_234: feature_name=cg25364972 | feature_id[1792].value ><br>threshold=0.2418053299188614  |
| node_238: feature_name=cg23485307 | feature_id[221].value ><br>threshold=0.14884746074676514  |
| node_242: feature_name=cg04873169 | feature_id[4696].value ><br>threshold=0.6058756709098816  |
| node_244: feature_name=cg17009731 | feature_id[3218].value ><br>threshold=0.6602252125740051  |
| node_246: feature_name=cg18253910 | feature_id[4458].value ><br>threshold=0.6904322504997253  |
| node_250: feature_name=cg04774476 | feature_id[1257].value ><br>threshold=0.5675267577171326  |
| node_256: feature_name=cg19259111 | feature_id[63].value ><br>threshold=0.40771469473838806   |

|                                   |                                                            |
|-----------------------------------|------------------------------------------------------------|
| node_264: feature_name=cg21483216 | feature_id[5253].value ><br>threshold=0.6332719326019287   |
| node_266: feature_name=cg04026354 | feature_id[3502].value <=<br>threshold=0.42332448065280914 |
| node_267: feature_name=cg11444072 | feature_id[116].value ><br>threshold=0.4940422773361206    |
| node_273: feature_name=cg08571020 | feature_id[381].value ><br>threshold=0.4616774618625641    |
| node_275: feature_name=cg08331427 | feature_id[2081].value ><br>threshold=0.5443233847618103   |
| node_281: feature_name=cg00216961 | feature_id[945].value <=<br>threshold=0.4166988283395767   |
| node_282: feature_name=cg04716580 | feature_id[1390].value ><br>threshold=0.4204266667366028   |
| node_286: feature_name=cg07891483 | feature_id[1877].value ><br>threshold=0.829958975315094    |
| node_288: feature_name=cg01475325 | feature_id[3969].value ><br>threshold=0.45323844254016876  |
| node_292: feature_name=cg19702397 | feature_id[2066].value ><br>threshold=0.3536848723888397   |
| node_294: feature_name=cg21936959 | feature_id[595].value ><br>threshold=0.5567200481891632    |
| node_308: feature_name=cg18645642 | feature_id[262].value ><br>threshold=0.42608243227005005   |
| node_310: feature_name=cg27351239 | feature_id[1874].value <=<br>threshold=0.6790103316307068  |
| node_311: feature_name=cg13107973 | feature_id[1326].value <=<br>threshold=0.6562457382678986  |
| node_312: feature_name=cg10024583 | feature_id[1175].value <=<br>threshold=0.518094539642334   |
| node_313: feature_name=cg18259342 | feature_id[4480].value ><br>threshold=0.19059929996728897  |
| node_315: feature_name=cg10979364 | feature_id[992].value ><br>threshold=0.44472505152225494   |
| node_317: feature_name=cg14406727 | feature_id[815].value ><br>threshold=0.36684730648994446   |
| node_319: feature_name=cg24926689 | feature_id[2976].value ><br>threshold=0.822247177362442    |
| node_321: feature_name=cg11535638 | feature_id[2812].value <=<br>threshold=0.7990793883800507  |
| node_322: feature_name=cg13039539 | feature_id[4333].value <=<br>threshold=0.8452905118465424  |
| Class: synovial sarcoma (SYSA)    |                                                            |

|                                   |                                                           |
|-----------------------------------|-----------------------------------------------------------|
| Rules_126                         | passed counts:1                                           |
| node_0: feature_name=cg11915444   | feature_id[2002].value ><br>threshold=0.3402601182460785  |
| node_10: feature_name=cg26016985  | feature_id[4407].value ><br>threshold=0.6493876278400421  |
| node_16: feature_name=cg23157618  | feature_id[5511].value ><br>threshold=0.5759606957435608  |
| node_20: feature_name=cg10480329  | feature_id[1439].value ><br>threshold=0.5518321692943573  |
| node_48: feature_name=cg17843418  | feature_id[4868].value ><br>threshold=0.34969255328178406 |
| node_52: feature_name=cg24407065  | feature_id[4522].value ><br>threshold=0.5364363789558411  |
| node_56: feature_name=cg07281938  | feature_id[249].value ><br>threshold=0.7506992518901825   |
| node_78: feature_name=cg21759907  | feature_id[1650].value ><br>threshold=0.46823520958423615 |
| node_98: feature_name=cg10886334  | feature_id[3975].value ><br>threshold=0.43698127567768097 |
| node_102: feature_name=cg09373983 | feature_id[5025].value ><br>threshold=0.5575815737247467  |
| node_106: feature_name=cg12948116 | feature_id[5360].value <=<br>threshold=0.5658791363239288 |
| node_107: feature_name=cg21906519 | feature_id[5251].value ><br>threshold=0.6089984774589539  |
| node_111: feature_name=cg17537493 | feature_id[4217].value ><br>threshold=0.5825372636318207  |
| node_117: feature_name=cg15720017 | feature_id[4443].value ><br>threshold=0.7009969055652618  |
| node_119: feature_name=cg06038180 | feature_id[3480].value ><br>threshold=0.4583848565816879  |
| node_121: feature_name=cg08619651 | feature_id[4882].value <=<br>threshold=0.2105495035648346 |
| node_122: feature_name=cg01014262 | feature_id[1911].value <=<br>threshold=0.5327437818050385 |
| node_123: feature_name=cg16863382 | feature_id[2922].value ><br>threshold=0.7200668156147003  |
| node_133: feature_name=cg06989443 | feature_id[2327].value <=<br>threshold=0.6579365730285645 |
| node_134: feature_name=cg07344990 | feature_id[2398].value ><br>threshold=0.5562876164913177  |

|                                   |                                                            |
|-----------------------------------|------------------------------------------------------------|
| node_138: feature_name=cg02966841 | feature_id[2199].value ><br>threshold=0.7744501233100891   |
| node_204: feature_name=cg12120430 | feature_id[3727].value ><br>threshold=0.5775820016860962   |
| node_206: feature_name=cg18386876 | feature_id[4066].value ><br>threshold=0.6847257018089294   |
| node_208: feature_name=cg02053092 | feature_id[3610].value ><br>threshold=0.39507485926151276  |
| node_210: feature_name=cg10298992 | feature_id[3603].value ><br>threshold=0.5707973837852478   |
| node_228: feature_name=cg03840920 | feature_id[4524].value ><br>threshold=0.5365143716335297   |
| node_234: feature_name=cg25364972 | feature_id[1792].value ><br>threshold=0.2418053299188614   |
| node_238: feature_name=cg23485307 | feature_id[221].value ><br>threshold=0.14884746074676514   |
| node_242: feature_name=cg04873169 | feature_id[4696].value ><br>threshold=0.6058756709098816   |
| node_244: feature_name=cg17009731 | feature_id[3218].value ><br>threshold=0.6602252125740051   |
| node_246: feature_name=cg18253910 | feature_id[4458].value ><br>threshold=0.6904322504997253   |
| node_250: feature_name=cg04774476 | feature_id[1257].value ><br>threshold=0.5675267577171326   |
| node_256: feature_name=cg19259111 | feature_id[63].value ><br>threshold=0.40771469473838806    |
| node_264: feature_name=cg21483216 | feature_id[5253].value ><br>threshold=0.6332719326019287   |
| node_266: feature_name=cg04026354 | feature_id[3502].value <=<br>threshold=0.42332448065280914 |
| node_267: feature_name=cg11444072 | feature_id[116].value ><br>threshold=0.4940422773361206    |
| node_273: feature_name=cg08571020 | feature_id[381].value ><br>threshold=0.4616774618625641    |
| node_275: feature_name=cg08331427 | feature_id[2081].value ><br>threshold=0.5443233847618103   |
| node_281: feature_name=cg00216961 | feature_id[945].value <=<br>threshold=0.4166988283395767   |
| node_282: feature_name=cg04716580 | feature_id[1390].value ><br>threshold=0.4204266667366028   |
| node_286: feature_name=cg07891483 | feature_id[1877].value ><br>threshold=0.829958975315094    |
| node_288: feature_name=cg01475325 | feature_id[3969].value ><br>threshold=0.45323844254016876  |

|                                                         |                                                           |
|---------------------------------------------------------|-----------------------------------------------------------|
| node_292: feature_name=cg19702397                       | feature_id[2066].value ><br>threshold=0.3536848723888397  |
| node_294: feature_name=cg21936959                       | feature_id[595].value <=<br>threshold=0.5567200481891632  |
| node_295: feature_name=cg05251593                       | feature_id[515].value <=<br>threshold=0.5597732663154602  |
| node_296: feature_name=cg01343045                       | feature_id[1653].value <=<br>threshold=0.9222070276737213 |
| node_297: feature_name=cg03701759                       | feature_id[3914].value <=<br>threshold=0.8587441444396973 |
| node_298: feature_name=cg12497581                       | feature_id[1864].value ><br>threshold=0.37188364565372467 |
| node_300: feature_name=cg04254198                       | feature_id[4941].value ><br>threshold=0.6460673660039902  |
| node_302: feature_name=cg18761894                       | feature_id[3126].value ><br>threshold=0.6353314220905304  |
| Class: low-grade endometrial stromal sarcoma (ESS (LG)) |                                                           |
|                                                         |                                                           |
| Rules_127                                               | passed counts:1                                           |
| node_0: feature_name=cg11915444                         | feature_id[2002].value ><br>threshold=0.3402601182460785  |
| node_10: feature_name=cg26016985                        | feature_id[4407].value ><br>threshold=0.6493876278400421  |
| node_16: feature_name=cg23157618                        | feature_id[5511].value ><br>threshold=0.5759606957435608  |
| node_20: feature_name=cg10480329                        | feature_id[1439].value ><br>threshold=0.5518321692943573  |
| node_48: feature_name=cg17843418                        | feature_id[4868].value ><br>threshold=0.34969255328178406 |
| node_52: feature_name=cg24407065                        | feature_id[4522].value ><br>threshold=0.5364363789558411  |
| node_56: feature_name=cg07281938                        | feature_id[249].value ><br>threshold=0.7506992518901825   |
| node_78: feature_name=cg21759907                        | feature_id[1650].value ><br>threshold=0.46823520958423615 |
| node_98: feature_name=cg10886334                        | feature_id[3975].value ><br>threshold=0.43698127567768097 |
| node_102: feature_name=cg09373983                       | feature_id[5025].value ><br>threshold=0.5575815737247467  |
| node_106: feature_name=cg12948116                       | feature_id[5360].value <=<br>threshold=0.5658791363239288 |

|                                   |                                                           |
|-----------------------------------|-----------------------------------------------------------|
| node_107: feature_name=cg21906519 | feature_id[5251].value ><br>threshold=0.6089984774589539  |
| node_111: feature_name=cg17537493 | feature_id[4217].value ><br>threshold=0.5825372636318207  |
| node_117: feature_name=cg15720017 | feature_id[4443].value ><br>threshold=0.7009969055652618  |
| node_119: feature_name=cg06038180 | feature_id[3480].value ><br>threshold=0.4583848565816879  |
| node_121: feature_name=cg08619651 | feature_id[4882].value <=<br>threshold=0.2105495035648346 |
| node_122: feature_name=cg01014262 | feature_id[1911].value <=<br>threshold=0.5327437818050385 |
| node_123: feature_name=cg16863382 | feature_id[2922].value ><br>threshold=0.7200668156147003  |
| node_133: feature_name=cg06989443 | feature_id[2327].value <=<br>threshold=0.6579365730285645 |
| node_134: feature_name=cg07344990 | feature_id[2398].value ><br>threshold=0.5562876164913177  |
| node_138: feature_name=cg02966841 | feature_id[2199].value ><br>threshold=0.7744501233100891  |
| node_204: feature_name=cg12120430 | feature_id[3727].value ><br>threshold=0.5775820016860962  |
| node_206: feature_name=cg18386876 | feature_id[4066].value ><br>threshold=0.6847257018089294  |
| node_208: feature_name=cg02053092 | feature_id[3610].value ><br>threshold=0.39507485926151276 |
| node_210: feature_name=cg10298992 | feature_id[3603].value ><br>threshold=0.5707973837852478  |
| node_228: feature_name=cg03840920 | feature_id[4524].value ><br>threshold=0.5365143716335297  |
| node_234: feature_name=cg25364972 | feature_id[1792].value ><br>threshold=0.2418053299188614  |
| node_238: feature_name=cg23485307 | feature_id[221].value ><br>threshold=0.14884746074676514  |
| node_242: feature_name=cg04873169 | feature_id[4696].value ><br>threshold=0.6058756709098816  |
| node_244: feature_name=cg17009731 | feature_id[3218].value ><br>threshold=0.6602252125740051  |
| node_246: feature_name=cg18253910 | feature_id[4458].value ><br>threshold=0.6904322504997253  |
| node_250: feature_name=cg04774476 | feature_id[1257].value ><br>threshold=0.5675267577171326  |
| node_256: feature_name=cg19259111 | feature_id[63].value ><br>threshold=0.40771469473838806   |

|                                               |                                                            |
|-----------------------------------------------|------------------------------------------------------------|
| node_264: feature_name=cg21483216             | feature_id[5253].value ><br>threshold=0.6332719326019287   |
| node_266: feature_name=cg04026354             | feature_id[3502].value <=<br>threshold=0.42332448065280914 |
| node_267: feature_name=cg11444072             | feature_id[116].value ><br>threshold=0.4940422773361206    |
| node_273: feature_name=cg08571020             | feature_id[381].value ><br>threshold=0.4616774618625641    |
| node_275: feature_name=cg08331427             | feature_id[2081].value ><br>threshold=0.5443233847618103   |
| node_281: feature_name=cg00216961             | feature_id[945].value <=<br>threshold=0.4166988283395767   |
| node_282: feature_name=cg04716580             | feature_id[1390].value ><br>threshold=0.4204266667366028   |
| node_286: feature_name=cg07891483             | feature_id[1877].value ><br>threshold=0.829958975315094    |
| node_288: feature_name=cg01475325             | feature_id[3969].value ><br>threshold=0.45323844254016876  |
| node_292: feature_name=cg19702397             | feature_id[2066].value ><br>threshold=0.3536848723888397   |
| node_294: feature_name=cg21936959             | feature_id[595].value <=<br>threshold=0.5567200481891632   |
| node_295: feature_name=cg05251593             | feature_id[515].value <=<br>threshold=0.5597732663154602   |
| node_296: feature_name=cg01343045             | feature_id[1653].value <=<br>threshold=0.9222070276737213  |
| node_297: feature_name=cg03701759             | feature_id[3914].value <=<br>threshold=0.8587441444396973  |
| node_298: feature_name=cg12497581             | feature_id[1864].value ><br>threshold=0.37188364565372467  |
| node_300: feature_name=cg04254198             | feature_id[4941].value ><br>threshold=0.6460673660039902   |
| node_302: feature_name=cg18761894             | feature_id[3126].value <=<br>threshold=0.6353314220905304  |
| Class: mesenchymal chondrosarcoma (CSA (MES)) |                                                            |
| Rules_128                                     | passed counts:1                                            |
| node_0: feature_name=cg11915444               | feature_id[2002].value ><br>threshold=0.3402601182460785   |
| node_10: feature_name=cg26016985              | feature_id[4407].value ><br>threshold=0.6493876278400421   |

|                                   |                                                           |
|-----------------------------------|-----------------------------------------------------------|
| node_16: feature_name=cg23157618  | feature_id[5511].value ><br>threshold=0.5759606957435608  |
| node_20: feature_name=cg10480329  | feature_id[1439].value ><br>threshold=0.5518321692943573  |
| node_48: feature_name=cg17843418  | feature_id[4868].value ><br>threshold=0.34969255328178406 |
| node_52: feature_name=cg24407065  | feature_id[4522].value ><br>threshold=0.5364363789558411  |
| node_56: feature_name=cg07281938  | feature_id[249].value ><br>threshold=0.7506992518901825   |
| node_78: feature_name=cg21759907  | feature_id[1650].value ><br>threshold=0.46823520958423615 |
| node_98: feature_name=cg10886334  | feature_id[3975].value ><br>threshold=0.43698127567768097 |
| node_102: feature_name=cg09373983 | feature_id[5025].value ><br>threshold=0.5575815737247467  |
| node_106: feature_name=cg12948116 | feature_id[5360].value <=<br>threshold=0.5658791363239288 |
| node_107: feature_name=cg21906519 | feature_id[5251].value ><br>threshold=0.6089984774589539  |
| node_111: feature_name=cg17537493 | feature_id[4217].value ><br>threshold=0.5825372636318207  |
| node_117: feature_name=cg15720017 | feature_id[4443].value ><br>threshold=0.7009969055652618  |
| node_119: feature_name=cg06038180 | feature_id[3480].value ><br>threshold=0.4583848565816879  |
| node_121: feature_name=cg08619651 | feature_id[4882].value <=<br>threshold=0.2105495035648346 |
| node_122: feature_name=cg01014262 | feature_id[1911].value <=<br>threshold=0.5327437818050385 |
| node_123: feature_name=cg16863382 | feature_id[2922].value ><br>threshold=0.7200668156147003  |
| node_133: feature_name=cg06989443 | feature_id[2327].value <=<br>threshold=0.6579365730285645 |
| node_134: feature_name=cg07344990 | feature_id[2398].value ><br>threshold=0.5562876164913177  |
| node_138: feature_name=cg02966841 | feature_id[2199].value ><br>threshold=0.7744501233100891  |
| node_204: feature_name=cg12120430 | feature_id[3727].value ><br>threshold=0.5775820016860962  |
| node_206: feature_name=cg18386876 | feature_id[4066].value ><br>threshold=0.6847257018089294  |
| node_208: feature_name=cg02053092 | feature_id[3610].value ><br>threshold=0.39507485926151276 |



|                                   |                                                            |
|-----------------------------------|------------------------------------------------------------|
| node_210: feature_name=cg10298992 | feature_id[3603].value ><br>threshold=0.5707973837852478   |
| node_228: feature_name=cg03840920 | feature_id[4524].value ><br>threshold=0.5365143716335297   |
| node_234: feature_name=cg25364972 | feature_id[1792].value ><br>threshold=0.2418053299188614   |
| node_238: feature_name=cg23485307 | feature_id[221].value ><br>threshold=0.14884746074676514   |
| node_242: feature_name=cg04873169 | feature_id[4696].value ><br>threshold=0.6058756709098816   |
| node_244: feature_name=cg17009731 | feature_id[3218].value ><br>threshold=0.6602252125740051   |
| node_246: feature_name=cg18253910 | feature_id[4458].value ><br>threshold=0.6904322504997253   |
| node_250: feature_name=cg04774476 | feature_id[1257].value ><br>threshold=0.5675267577171326   |
| node_256: feature_name=cg19259111 | feature_id[63].value ><br>threshold=0.40771469473838806    |
| node_264: feature_name=cg21483216 | feature_id[5253].value ><br>threshold=0.6332719326019287   |
| node_266: feature_name=cg04026354 | feature_id[3502].value <=<br>threshold=0.42332448065280914 |
| node_267: feature_name=cg11444072 | feature_id[116].value ><br>threshold=0.4940422773361206    |
| node_273: feature_name=cg08571020 | feature_id[381].value ><br>threshold=0.4616774618625641    |
| node_275: feature_name=cg08331427 | feature_id[2081].value ><br>threshold=0.5443233847618103   |
| node_281: feature_name=cg00216961 | feature_id[945].value <=<br>threshold=0.4166988283395767   |
| node_282: feature_name=cg04716580 | feature_id[1390].value ><br>threshold=0.4204266667366028   |
| node_286: feature_name=cg07891483 | feature_id[1877].value ><br>threshold=0.829958975315094    |
| node_288: feature_name=cg01475325 | feature_id[3969].value ><br>threshold=0.45323844254016876  |
| node_292: feature_name=cg19702397 | feature_id[2066].value ><br>threshold=0.3536848723888397   |
| node_294: feature_name=cg21936959 | feature_id[595].value <=<br>threshold=0.5567200481891632   |
| node_295: feature_name=cg05251593 | feature_id[515].value <=<br>threshold=0.5597732663154602   |
| node_296: feature_name=cg01343045 | feature_id[1653].value <=<br>threshold=0.9222070276737213  |

|                                   |                                                           |
|-----------------------------------|-----------------------------------------------------------|
| node_297: feature_name=cg03701759 | feature_id[3914].value <=<br>threshold=0.8587441444396973 |
| node_298: feature_name=cg12497581 | feature_id[1864].value ><br>threshold=0.37188364565372467 |
| node_300: feature_name=cg04254198 | feature_id[4941].value <=<br>threshold=0.6460673660039902 |
| Class: synovial sarcoma (SYSA)    |                                                           |
| Rules_129                         | passed counts:1                                           |
| node_0: feature_name=cg11915444   | feature_id[2002].value ><br>threshold=0.3402601182460785  |
| node_10: feature_name=cg26016985  | feature_id[4407].value ><br>threshold=0.6493876278400421  |
| node_16: feature_name=cg23157618  | feature_id[5511].value ><br>threshold=0.5759606957435608  |
| node_20: feature_name=cg10480329  | feature_id[1439].value ><br>threshold=0.5518321692943573  |
| node_48: feature_name=cg17843418  | feature_id[4868].value ><br>threshold=0.34969255328178406 |
| node_52: feature_name=cg24407065  | feature_id[4522].value ><br>threshold=0.5364363789558411  |
| node_56: feature_name=cg07281938  | feature_id[249].value ><br>threshold=0.7506992518901825   |
| node_78: feature_name=cg21759907  | feature_id[1650].value ><br>threshold=0.46823520958423615 |
| node_98: feature_name=cg10886334  | feature_id[3975].value ><br>threshold=0.43698127567768097 |
| node_102: feature_name=cg09373983 | feature_id[5025].value ><br>threshold=0.5575815737247467  |
| node_106: feature_name=cg12948116 | feature_id[5360].value <=<br>threshold=0.5658791363239288 |
| node_107: feature_name=cg21906519 | feature_id[5251].value ><br>threshold=0.6089984774589539  |
| node_111: feature_name=cg17537493 | feature_id[4217].value ><br>threshold=0.5825372636318207  |
| node_117: feature_name=cg15720017 | feature_id[4443].value ><br>threshold=0.7009969055652618  |
| node_119: feature_name=cg06038180 | feature_id[3480].value ><br>threshold=0.4583848565816879  |
| node_121: feature_name=cg08619651 | feature_id[4882].value <=<br>threshold=0.2105495035648346 |
| node_122: feature_name=cg01014262 | feature_id[1911].value <=<br>threshold=0.5327437818050385 |

|                                   |                                                            |
|-----------------------------------|------------------------------------------------------------|
| node_123: feature_name=cg16863382 | feature_id[2922].value ><br>threshold=0.7200668156147003   |
| node_133: feature_name=cg06989443 | feature_id[2327].value <=<br>threshold=0.6579365730285645  |
| node_134: feature_name=cg07344990 | feature_id[2398].value ><br>threshold=0.5562876164913177   |
| node_138: feature_name=cg02966841 | feature_id[2199].value ><br>threshold=0.7744501233100891   |
| node_204: feature_name=cg12120430 | feature_id[3727].value ><br>threshold=0.5775820016860962   |
| node_206: feature_name=cg18386876 | feature_id[4066].value ><br>threshold=0.6847257018089294   |
| node_208: feature_name=cg02053092 | feature_id[3610].value ><br>threshold=0.39507485926151276  |
| node_210: feature_name=cg10298992 | feature_id[3603].value ><br>threshold=0.5707973837852478   |
| node_228: feature_name=cg03840920 | feature_id[4524].value ><br>threshold=0.5365143716335297   |
| node_234: feature_name=cg25364972 | feature_id[1792].value ><br>threshold=0.2418053299188614   |
| node_238: feature_name=cg23485307 | feature_id[221].value ><br>threshold=0.14884746074676514   |
| node_242: feature_name=cg04873169 | feature_id[4696].value ><br>threshold=0.6058756709098816   |
| node_244: feature_name=cg17009731 | feature_id[3218].value ><br>threshold=0.6602252125740051   |
| node_246: feature_name=cg18253910 | feature_id[4458].value ><br>threshold=0.6904322504997253   |
| node_250: feature_name=cg04774476 | feature_id[1257].value ><br>threshold=0.5675267577171326   |
| node_256: feature_name=cg19259111 | feature_id[63].value ><br>threshold=0.40771469473838806    |
| node_264: feature_name=cg21483216 | feature_id[5253].value ><br>threshold=0.6332719326019287   |
| node_266: feature_name=cg04026354 | feature_id[3502].value <=<br>threshold=0.42332448065280914 |
| node_267: feature_name=cg11444072 | feature_id[116].value ><br>threshold=0.4940422773361206    |
| node_273: feature_name=cg08571020 | feature_id[381].value ><br>threshold=0.4616774618625641    |
| node_275: feature_name=cg08331427 | feature_id[2081].value ><br>threshold=0.5443233847618103   |
| node_281: feature_name=cg00216961 | feature_id[945].value <=<br>threshold=0.4166988283395767   |

|                                         |                                                            |
|-----------------------------------------|------------------------------------------------------------|
| node_282: feature_name=cg04716580       | feature_id[1390].value ><br>threshold=0.4204266667366028   |
| node_286: feature_name=cg07891483       | feature_id[1877].value ><br>threshold=0.829958975315094    |
| node_288: feature_name=cg01475325       | feature_id[3969].value <=<br>threshold=0.45323844254016876 |
| node_289: feature_name=cg21925748       | feature_id[5244].value ><br>threshold=0.7208462655544281   |
| Class: undifferentiated sarcoma (USARC) |                                                            |
| Rules_130                               | passed counts:1                                            |
| node_0: feature_name=cg11915444         | feature_id[2002].value ><br>threshold=0.3402601182460785   |
| node_10: feature_name=cg26016985        | feature_id[4407].value ><br>threshold=0.6493876278400421   |
| node_16: feature_name=cg23157618        | feature_id[5511].value ><br>threshold=0.5759606957435608   |
| node_20: feature_name=cg10480329        | feature_id[1439].value ><br>threshold=0.5518321692943573   |
| node_48: feature_name=cg17843418        | feature_id[4868].value ><br>threshold=0.34969255328178406  |
| node_52: feature_name=cg24407065        | feature_id[4522].value ><br>threshold=0.5364363789558411   |
| node_56: feature_name=cg07281938        | feature_id[249].value ><br>threshold=0.7506992518901825    |
| node_78: feature_name=cg21759907        | feature_id[1650].value ><br>threshold=0.46823520958423615  |
| node_98: feature_name=cg10886334        | feature_id[3975].value ><br>threshold=0.43698127567768097  |
| node_102: feature_name=cg09373983       | feature_id[5025].value ><br>threshold=0.5575815737247467   |
| node_106: feature_name=cg12948116       | feature_id[5360].value <=<br>threshold=0.5658791363239288  |
| node_107: feature_name=cg21906519       | feature_id[5251].value ><br>threshold=0.6089984774589539   |
| node_111: feature_name=cg17537493       | feature_id[4217].value ><br>threshold=0.5825372636318207   |
| node_117: feature_name=cg15720017       | feature_id[4443].value ><br>threshold=0.7009969055652618   |
| node_119: feature_name=cg06038180       | feature_id[3480].value ><br>threshold=0.4583848565816879   |
| node_121: feature_name=cg08619651       | feature_id[4882].value <=<br>threshold=0.2105495035648346  |

|                                   |                                                            |
|-----------------------------------|------------------------------------------------------------|
| node_122: feature_name=cg01014262 | feature_id[1911].value <=<br>threshold=0.5327437818050385  |
| node_123: feature_name=cg16863382 | feature_id[2922].value ><br>threshold=0.7200668156147003   |
| node_133: feature_name=cg06989443 | feature_id[2327].value <=<br>threshold=0.6579365730285645  |
| node_134: feature_name=cg07344990 | feature_id[2398].value ><br>threshold=0.5562876164913177   |
| node_138: feature_name=cg02966841 | feature_id[2199].value ><br>threshold=0.7744501233100891   |
| node_204: feature_name=cg12120430 | feature_id[3727].value ><br>threshold=0.5775820016860962   |
| node_206: feature_name=cg18386876 | feature_id[4066].value ><br>threshold=0.6847257018089294   |
| node_208: feature_name=cg02053092 | feature_id[3610].value ><br>threshold=0.39507485926151276  |
| node_210: feature_name=cg10298992 | feature_id[3603].value ><br>threshold=0.5707973837852478   |
| node_228: feature_name=cg03840920 | feature_id[4524].value ><br>threshold=0.5365143716335297   |
| node_234: feature_name=cg25364972 | feature_id[1792].value ><br>threshold=0.2418053299188614   |
| node_238: feature_name=cg23485307 | feature_id[221].value ><br>threshold=0.14884746074676514   |
| node_242: feature_name=cg04873169 | feature_id[4696].value ><br>threshold=0.6058756709098816   |
| node_244: feature_name=cg17009731 | feature_id[3218].value ><br>threshold=0.6602252125740051   |
| node_246: feature_name=cg18253910 | feature_id[4458].value ><br>threshold=0.6904322504997253   |
| node_250: feature_name=cg04774476 | feature_id[1257].value ><br>threshold=0.5675267577171326   |
| node_256: feature_name=cg19259111 | feature_id[63].value ><br>threshold=0.40771469473838806    |
| node_264: feature_name=cg21483216 | feature_id[5253].value ><br>threshold=0.6332719326019287   |
| node_266: feature_name=cg04026354 | feature_id[3502].value <=<br>threshold=0.42332448065280914 |
| node_267: feature_name=cg11444072 | feature_id[116].value ><br>threshold=0.4940422773361206    |
| node_273: feature_name=cg08571020 | feature_id[381].value ><br>threshold=0.4616774618625641    |
| node_275: feature_name=cg08331427 | feature_id[2081].value ><br>threshold=0.5443233847618103   |

|                                   |                                                           |
|-----------------------------------|-----------------------------------------------------------|
| node_281: feature_name=cg00216961 | feature_id[945].value <=<br>threshold=0.4166988283395767  |
| node_282: feature_name=cg04716580 | feature_id[1390].value <=<br>threshold=0.4204266667366028 |
| node_283: feature_name=cg09180239 | feature_id[2620].value <=<br>threshold=0.7707420885562897 |
| Class: synovial sarcoma (SYSA)    |                                                           |
| Rules_131                         | passed counts:1                                           |
| node_0: feature_name=cg11915444   | feature_id[2002].value ><br>threshold=0.3402601182460785  |
| node_10: feature_name=cg26016985  | feature_id[4407].value ><br>threshold=0.6493876278400421  |
| node_16: feature_name=cg23157618  | feature_id[5511].value ><br>threshold=0.5759606957435608  |
| node_20: feature_name=cg10480329  | feature_id[1439].value ><br>threshold=0.5518321692943573  |
| node_48: feature_name=cg17843418  | feature_id[4868].value ><br>threshold=0.34969255328178406 |
| node_52: feature_name=cg24407065  | feature_id[4522].value ><br>threshold=0.5364363789558411  |
| node_56: feature_name=cg07281938  | feature_id[249].value ><br>threshold=0.7506992518901825   |
| node_78: feature_name=cg21759907  | feature_id[1650].value ><br>threshold=0.46823520958423615 |
| node_98: feature_name=cg10886334  | feature_id[3975].value ><br>threshold=0.43698127567768097 |
| node_102: feature_name=cg09373983 | feature_id[5025].value ><br>threshold=0.5575815737247467  |
| node_106: feature_name=cg12948116 | feature_id[5360].value <=<br>threshold=0.5658791363239288 |
| node_107: feature_name=cg21906519 | feature_id[5251].value ><br>threshold=0.6089984774589539  |
| node_111: feature_name=cg17537493 | feature_id[4217].value ><br>threshold=0.5825372636318207  |
| node_117: feature_name=cg15720017 | feature_id[4443].value ><br>threshold=0.7009969055652618  |
| node_119: feature_name=cg06038180 | feature_id[3480].value ><br>threshold=0.4583848565816879  |
| node_121: feature_name=cg08619651 | feature_id[4882].value <=<br>threshold=0.2105495035648346 |
| node_122: feature_name=cg01014262 | feature_id[1911].value <=<br>threshold=0.5327437818050385 |

|                                   |                                                            |
|-----------------------------------|------------------------------------------------------------|
| node_123: feature_name=cg16863382 | feature_id[2922].value ><br>threshold=0.7200668156147003   |
| node_133: feature_name=cg06989443 | feature_id[2327].value <=<br>threshold=0.6579365730285645  |
| node_134: feature_name=cg07344990 | feature_id[2398].value ><br>threshold=0.5562876164913177   |
| node_138: feature_name=cg02966841 | feature_id[2199].value ><br>threshold=0.7744501233100891   |
| node_204: feature_name=cg12120430 | feature_id[3727].value ><br>threshold=0.5775820016860962   |
| node_206: feature_name=cg18386876 | feature_id[4066].value ><br>threshold=0.6847257018089294   |
| node_208: feature_name=cg02053092 | feature_id[3610].value ><br>threshold=0.39507485926151276  |
| node_210: feature_name=cg10298992 | feature_id[3603].value ><br>threshold=0.5707973837852478   |
| node_228: feature_name=cg03840920 | feature_id[4524].value ><br>threshold=0.5365143716335297   |
| node_234: feature_name=cg25364972 | feature_id[1792].value ><br>threshold=0.2418053299188614   |
| node_238: feature_name=cg23485307 | feature_id[221].value ><br>threshold=0.14884746074676514   |
| node_242: feature_name=cg04873169 | feature_id[4696].value ><br>threshold=0.6058756709098816   |
| node_244: feature_name=cg17009731 | feature_id[3218].value ><br>threshold=0.6602252125740051   |
| node_246: feature_name=cg18253910 | feature_id[4458].value ><br>threshold=0.6904322504997253   |
| node_250: feature_name=cg04774476 | feature_id[1257].value ><br>threshold=0.5675267577171326   |
| node_256: feature_name=cg19259111 | feature_id[63].value ><br>threshold=0.40771469473838806    |
| node_264: feature_name=cg21483216 | feature_id[5253].value ><br>threshold=0.6332719326019287   |
| node_266: feature_name=cg04026354 | feature_id[3502].value <=<br>threshold=0.42332448065280914 |
| node_267: feature_name=cg11444072 | feature_id[116].value ><br>threshold=0.4940422773361206    |
| node_273: feature_name=cg08571020 | feature_id[381].value ><br>threshold=0.4616774618625641    |
| node_275: feature_name=cg08331427 | feature_id[2081].value <=<br>threshold=0.5443233847618103  |
| node_276: feature_name=cg23936766 | feature_id[683].value ><br>threshold=0.3338508605957031    |

|                                                                                   |                                                           |
|-----------------------------------------------------------------------------------|-----------------------------------------------------------|
| node_278: feature_name=cg14178043                                                 | feature_id[915].value ><br>threshold=0.42369575798511505  |
| Class: well differentiated liposarcoma (WDLS)/dedifferentiated liposarcoma (DDLs) |                                                           |
| Rules_132                                                                         | passed counts:1                                           |
| node_0: feature_name=cg11915444                                                   | feature_id[2002].value ><br>threshold=0.3402601182460785  |
| node_10: feature_name=cg26016985                                                  | feature_id[4407].value ><br>threshold=0.6493876278400421  |
| node_16: feature_name=cg23157618                                                  | feature_id[5511].value ><br>threshold=0.5759606957435608  |
| node_20: feature_name=cg10480329                                                  | feature_id[1439].value ><br>threshold=0.5518321692943573  |
| node_48: feature_name=cg17843418                                                  | feature_id[4868].value ><br>threshold=0.34969255328178406 |
| node_52: feature_name=cg24407065                                                  | feature_id[4522].value ><br>threshold=0.5364363789558411  |
| node_56: feature_name=cg07281938                                                  | feature_id[249].value ><br>threshold=0.7506992518901825   |
| node_78: feature_name=cg21759907                                                  | feature_id[1650].value ><br>threshold=0.46823520958423615 |
| node_98: feature_name=cg10886334                                                  | feature_id[3975].value ><br>threshold=0.43698127567768097 |
| node_102: feature_name=cg09373983                                                 | feature_id[5025].value ><br>threshold=0.5575815737247467  |
| node_106: feature_name=cg12948116                                                 | feature_id[5360].value <=<br>threshold=0.5658791363239288 |
| node_107: feature_name=cg21906519                                                 | feature_id[5251].value ><br>threshold=0.6089984774589539  |
| node_111: feature_name=cg17537493                                                 | feature_id[4217].value ><br>threshold=0.5825372636318207  |
| node_117: feature_name=cg15720017                                                 | feature_id[4443].value ><br>threshold=0.7009969055652618  |
| node_119: feature_name=cg06038180                                                 | feature_id[3480].value ><br>threshold=0.4583848565816879  |
| node_121: feature_name=cg08619651                                                 | feature_id[4882].value <=<br>threshold=0.2105495035648346 |
| node_122: feature_name=cg01014262                                                 | feature_id[1911].value <=<br>threshold=0.5327437818050385 |
| node_123: feature_name=cg16863382                                                 | feature_id[2922].value ><br>threshold=0.7200668156147003  |



|                                   |                                                            |
|-----------------------------------|------------------------------------------------------------|
| node_133: feature_name=cg06989443 | feature_id[2327].value <=<br>threshold=0.6579365730285645  |
| node_134: feature_name=cg07344990 | feature_id[2398].value ><br>threshold=0.5562876164913177   |
| node_138: feature_name=cg02966841 | feature_id[2199].value ><br>threshold=0.7744501233100891   |
| node_204: feature_name=cg12120430 | feature_id[3727].value ><br>threshold=0.5775820016860962   |
| node_206: feature_name=cg18386876 | feature_id[4066].value ><br>threshold=0.6847257018089294   |
| node_208: feature_name=cg02053092 | feature_id[3610].value ><br>threshold=0.39507485926151276  |
| node_210: feature_name=cg10298992 | feature_id[3603].value ><br>threshold=0.5707973837852478   |
| node_228: feature_name=cg03840920 | feature_id[4524].value ><br>threshold=0.5365143716335297   |
| node_234: feature_name=cg25364972 | feature_id[1792].value ><br>threshold=0.2418053299188614   |
| node_238: feature_name=cg23485307 | feature_id[221].value ><br>threshold=0.14884746074676514   |
| node_242: feature_name=cg04873169 | feature_id[4696].value ><br>threshold=0.6058756709098816   |
| node_244: feature_name=cg17009731 | feature_id[3218].value ><br>threshold=0.6602252125740051   |
| node_246: feature_name=cg18253910 | feature_id[4458].value ><br>threshold=0.6904322504997253   |
| node_250: feature_name=cg04774476 | feature_id[1257].value ><br>threshold=0.5675267577171326   |
| node_256: feature_name=cg19259111 | feature_id[63].value ><br>threshold=0.40771469473838806    |
| node_264: feature_name=cg21483216 | feature_id[5253].value ><br>threshold=0.6332719326019287   |
| node_266: feature_name=cg04026354 | feature_id[3502].value <=<br>threshold=0.42332448065280914 |
| node_267: feature_name=cg11444072 | feature_id[116].value ><br>threshold=0.4940422773361206    |
| node_273: feature_name=cg08571020 | feature_id[381].value ><br>threshold=0.4616774618625641    |
| node_275: feature_name=cg08331427 | feature_id[2081].value <=<br>threshold=0.5443233847618103  |
| node_276: feature_name=cg23936766 | feature_id[683].value ><br>threshold=0.3338508605957031    |
| node_278: feature_name=cg14178043 | feature_id[915].value <=<br>threshold=0.42369575798511505  |

|                                   |                                                           |
|-----------------------------------|-----------------------------------------------------------|
| Class: angiosarcoma (AS)          |                                                           |
| Rules_133                         | passed counts:1                                           |
| node_0: feature_name=cg11915444   | feature_id[2002].value ><br>threshold=0.3402601182460785  |
| node_10: feature_name=cg26016985  | feature_id[4407].value ><br>threshold=0.6493876278400421  |
| node_16: feature_name=cg23157618  | feature_id[5511].value ><br>threshold=0.5759606957435608  |
| node_20: feature_name=cg10480329  | feature_id[1439].value ><br>threshold=0.5518321692943573  |
| node_48: feature_name=cg17843418  | feature_id[4868].value ><br>threshold=0.34969255328178406 |
| node_52: feature_name=cg24407065  | feature_id[4522].value ><br>threshold=0.5364363789558411  |
| node_56: feature_name=cg07281938  | feature_id[249].value ><br>threshold=0.7506992518901825   |
| node_78: feature_name=cg21759907  | feature_id[1650].value ><br>threshold=0.46823520958423615 |
| node_98: feature_name=cg10886334  | feature_id[3975].value ><br>threshold=0.43698127567768097 |
| node_102: feature_name=cg09373983 | feature_id[5025].value ><br>threshold=0.5575815737247467  |
| node_106: feature_name=cg12948116 | feature_id[5360].value <=<br>threshold=0.5658791363239288 |
| node_107: feature_name=cg21906519 | feature_id[5251].value ><br>threshold=0.6089984774589539  |
| node_111: feature_name=cg17537493 | feature_id[4217].value ><br>threshold=0.5825372636318207  |
| node_117: feature_name=cg15720017 | feature_id[4443].value ><br>threshold=0.7009969055652618  |
| node_119: feature_name=cg06038180 | feature_id[3480].value ><br>threshold=0.4583848565816879  |
| node_121: feature_name=cg08619651 | feature_id[4882].value <=<br>threshold=0.2105495035648346 |
| node_122: feature_name=cg01014262 | feature_id[1911].value <=<br>threshold=0.5327437818050385 |
| node_123: feature_name=cg16863382 | feature_id[2922].value ><br>threshold=0.7200668156147003  |
| node_133: feature_name=cg06989443 | feature_id[2327].value <=<br>threshold=0.6579365730285645 |
| node_134: feature_name=cg07344990 | feature_id[2398].value ><br>threshold=0.5562876164913177  |

|                                   |                                                            |
|-----------------------------------|------------------------------------------------------------|
| node_138: feature_name=cg02966841 | feature_id[2199].value ><br>threshold=0.7744501233100891   |
| node_204: feature_name=cg12120430 | feature_id[3727].value ><br>threshold=0.5775820016860962   |
| node_206: feature_name=cg18386876 | feature_id[4066].value ><br>threshold=0.6847257018089294   |
| node_208: feature_name=cg02053092 | feature_id[3610].value ><br>threshold=0.39507485926151276  |
| node_210: feature_name=cg10298992 | feature_id[3603].value ><br>threshold=0.5707973837852478   |
| node_228: feature_name=cg03840920 | feature_id[4524].value ><br>threshold=0.5365143716335297   |
| node_234: feature_name=cg25364972 | feature_id[1792].value ><br>threshold=0.2418053299188614   |
| node_238: feature_name=cg23485307 | feature_id[221].value ><br>threshold=0.14884746074676514   |
| node_242: feature_name=cg04873169 | feature_id[4696].value ><br>threshold=0.6058756709098816   |
| node_244: feature_name=cg17009731 | feature_id[3218].value ><br>threshold=0.6602252125740051   |
| node_246: feature_name=cg18253910 | feature_id[4458].value ><br>threshold=0.6904322504997253   |
| node_250: feature_name=cg04774476 | feature_id[1257].value ><br>threshold=0.5675267577171326   |
| node_256: feature_name=cg19259111 | feature_id[63].value ><br>threshold=0.40771469473838806    |
| node_264: feature_name=cg21483216 | feature_id[5253].value ><br>threshold=0.6332719326019287   |
| node_266: feature_name=cg04026354 | feature_id[3502].value <=<br>threshold=0.42332448065280914 |
| node_267: feature_name=cg11444072 | feature_id[116].value <=<br>threshold=0.4940422773361206   |
| node_268: feature_name=cg25424742 | feature_id[2698].value ><br>threshold=0.762436032295227    |
| node_270: feature_name=cg23632333 | feature_id[4343].value <=<br>threshold=0.88172447681427    |
| Class: myositis proliferans (MP)  |                                                            |
|                                   |                                                            |
| Rules_134                         | passed counts:1                                            |
| node_0: feature_name=cg11915444   | feature_id[2002].value ><br>threshold=0.3402601182460785   |
| node_10: feature_name=cg26016985  | feature_id[4407].value ><br>threshold=0.6493876278400421   |

|                                   |                                                           |
|-----------------------------------|-----------------------------------------------------------|
| node_16: feature_name=cg23157618  | feature_id[5511].value ><br>threshold=0.5759606957435608  |
| node_20: feature_name=cg10480329  | feature_id[1439].value ><br>threshold=0.5518321692943573  |
| node_48: feature_name=cg17843418  | feature_id[4868].value ><br>threshold=0.34969255328178406 |
| node_52: feature_name=cg24407065  | feature_id[4522].value ><br>threshold=0.5364363789558411  |
| node_56: feature_name=cg07281938  | feature_id[249].value ><br>threshold=0.7506992518901825   |
| node_78: feature_name=cg21759907  | feature_id[1650].value ><br>threshold=0.46823520958423615 |
| node_98: feature_name=cg10886334  | feature_id[3975].value ><br>threshold=0.43698127567768097 |
| node_102: feature_name=cg09373983 | feature_id[5025].value ><br>threshold=0.5575815737247467  |
| node_106: feature_name=cg12948116 | feature_id[5360].value <=<br>threshold=0.5658791363239288 |
| node_107: feature_name=cg21906519 | feature_id[5251].value ><br>threshold=0.6089984774589539  |
| node_111: feature_name=cg17537493 | feature_id[4217].value ><br>threshold=0.5825372636318207  |
| node_117: feature_name=cg15720017 | feature_id[4443].value ><br>threshold=0.7009969055652618  |
| node_119: feature_name=cg06038180 | feature_id[3480].value ><br>threshold=0.4583848565816879  |
| node_121: feature_name=cg08619651 | feature_id[4882].value <=<br>threshold=0.2105495035648346 |
| node_122: feature_name=cg01014262 | feature_id[1911].value <=<br>threshold=0.5327437818050385 |
| node_123: feature_name=cg16863382 | feature_id[2922].value ><br>threshold=0.7200668156147003  |
| node_133: feature_name=cg06989443 | feature_id[2327].value <=<br>threshold=0.6579365730285645 |
| node_134: feature_name=cg07344990 | feature_id[2398].value ><br>threshold=0.5562876164913177  |
| node_138: feature_name=cg02966841 | feature_id[2199].value ><br>threshold=0.7744501233100891  |
| node_204: feature_name=cg12120430 | feature_id[3727].value ><br>threshold=0.5775820016860962  |
| node_206: feature_name=cg18386876 | feature_id[4066].value ><br>threshold=0.6847257018089294  |
| node_208: feature_name=cg02053092 | feature_id[3610].value ><br>threshold=0.39507485926151276 |

|                                   |                                                           |
|-----------------------------------|-----------------------------------------------------------|
| node_210: feature_name=cg10298992 | feature_id[3603].value ><br>threshold=0.5707973837852478  |
| node_228: feature_name=cg03840920 | feature_id[4524].value ><br>threshold=0.5365143716335297  |
| node_234: feature_name=cg25364972 | feature_id[1792].value ><br>threshold=0.2418053299188614  |
| node_238: feature_name=cg23485307 | feature_id[221].value ><br>threshold=0.14884746074676514  |
| node_242: feature_name=cg04873169 | feature_id[4696].value ><br>threshold=0.6058756709098816  |
| node_244: feature_name=cg17009731 | feature_id[3218].value ><br>threshold=0.6602252125740051  |
| node_246: feature_name=cg18253910 | feature_id[4458].value ><br>threshold=0.6904322504997253  |
| node_250: feature_name=cg04774476 | feature_id[1257].value ><br>threshold=0.5675267577171326  |
| node_256: feature_name=cg19259111 | feature_id[63].value <=<br>threshold=0.40771469473838806  |
| node_257: feature_name=cg10803714 | feature_id[856].value ><br>threshold=0.4142659604549408   |
| node_259: feature_name=cg23350812 | feature_id[1133].value ><br>threshold=0.8047192692756653  |
| node_261: feature_name=cg20464155 | feature_id[1845].value ><br>threshold=0.6415376514196396  |
| Class: Ewing sarcoma (EWING)      |                                                           |
|                                   |                                                           |
| Rules_135                         | passed counts:1                                           |
| node_0: feature_name=cg11915444   | feature_id[2002].value ><br>threshold=0.3402601182460785  |
| node_10: feature_name=cg26016985  | feature_id[4407].value ><br>threshold=0.6493876278400421  |
| node_16: feature_name=cg23157618  | feature_id[5511].value ><br>threshold=0.5759606957435608  |
| node_20: feature_name=cg10480329  | feature_id[1439].value ><br>threshold=0.5518321692943573  |
| node_48: feature_name=cg17843418  | feature_id[4868].value ><br>threshold=0.34969255328178406 |
| node_52: feature_name=cg24407065  | feature_id[4522].value ><br>threshold=0.5364363789558411  |
| node_56: feature_name=cg07281938  | feature_id[249].value ><br>threshold=0.7506992518901825   |
| node_78: feature_name=cg21759907  | feature_id[1650].value ><br>threshold=0.46823520958423615 |

|                                   |                                                           |
|-----------------------------------|-----------------------------------------------------------|
| node_98: feature_name=cg10886334  | feature_id[3975].value ><br>threshold=0.43698127567768097 |
| node_102: feature_name=cg09373983 | feature_id[5025].value ><br>threshold=0.5575815737247467  |
| node_106: feature_name=cg12948116 | feature_id[5360].value <=<br>threshold=0.5658791363239288 |
| node_107: feature_name=cg21906519 | feature_id[5251].value ><br>threshold=0.6089984774589539  |
| node_111: feature_name=cg17537493 | feature_id[4217].value ><br>threshold=0.5825372636318207  |
| node_117: feature_name=cg15720017 | feature_id[4443].value ><br>threshold=0.7009969055652618  |
| node_119: feature_name=cg06038180 | feature_id[3480].value ><br>threshold=0.4583848565816879  |
| node_121: feature_name=cg08619651 | feature_id[4882].value <=<br>threshold=0.2105495035648346 |
| node_122: feature_name=cg01014262 | feature_id[1911].value <=<br>threshold=0.5327437818050385 |
| node_123: feature_name=cg16863382 | feature_id[2922].value ><br>threshold=0.7200668156147003  |
| node_133: feature_name=cg06989443 | feature_id[2327].value <=<br>threshold=0.6579365730285645 |
| node_134: feature_name=cg07344990 | feature_id[2398].value ><br>threshold=0.5562876164913177  |
| node_138: feature_name=cg02966841 | feature_id[2199].value ><br>threshold=0.7744501233100891  |
| node_204: feature_name=cg12120430 | feature_id[3727].value ><br>threshold=0.5775820016860962  |
| node_206: feature_name=cg18386876 | feature_id[4066].value ><br>threshold=0.6847257018089294  |
| node_208: feature_name=cg02053092 | feature_id[3610].value ><br>threshold=0.39507485926151276 |
| node_210: feature_name=cg10298992 | feature_id[3603].value ><br>threshold=0.5707973837852478  |
| node_228: feature_name=cg03840920 | feature_id[4524].value ><br>threshold=0.5365143716335297  |
| node_234: feature_name=cg25364972 | feature_id[1792].value ><br>threshold=0.2418053299188614  |
| node_238: feature_name=cg23485307 | feature_id[221].value ><br>threshold=0.14884746074676514  |
| node_242: feature_name=cg04873169 | feature_id[4696].value ><br>threshold=0.6058756709098816  |
| node_244: feature_name=cg17009731 | feature_id[3218].value ><br>threshold=0.6602252125740051  |

|                                   |                                                           |
|-----------------------------------|-----------------------------------------------------------|
| node_246: feature_name=cg18253910 | feature_id[4458].value ><br>threshold=0.6904322504997253  |
| node_250: feature_name=cg04774476 | feature_id[1257].value ><br>threshold=0.5675267577171326  |
| node_256: feature_name=cg19259111 | feature_id[63].value <=<br>threshold=0.40771469473838806  |
| node_257: feature_name=cg10803714 | feature_id[856].value ><br>threshold=0.4142659604549408   |
| node_259: feature_name=cg23350812 | feature_id[1133].value ><br>threshold=0.8047192692756653  |
| node_261: feature_name=cg20464155 | feature_id[1845].value <=<br>threshold=0.6415376514196396 |
| Class: leiomyosarcoma (LMS)       |                                                           |
|                                   |                                                           |
| Rules_136                         | passed counts:1                                           |
| node_0: feature_name=cg11915444   | feature_id[2002].value ><br>threshold=0.3402601182460785  |
| node_10: feature_name=cg26016985  | feature_id[4407].value ><br>threshold=0.6493876278400421  |
| node_16: feature_name=cg23157618  | feature_id[5511].value ><br>threshold=0.5759606957435608  |
| node_20: feature_name=cg10480329  | feature_id[1439].value ><br>threshold=0.5518321692943573  |
| node_48: feature_name=cg17843418  | feature_id[4868].value ><br>threshold=0.34969255328178406 |
| node_52: feature_name=cg24407065  | feature_id[4522].value ><br>threshold=0.5364363789558411  |
| node_56: feature_name=cg07281938  | feature_id[249].value ><br>threshold=0.7506992518901825   |
| node_78: feature_name=cg21759907  | feature_id[1650].value ><br>threshold=0.46823520958423615 |
| node_98: feature_name=cg10886334  | feature_id[3975].value ><br>threshold=0.43698127567768097 |
| node_102: feature_name=cg09373983 | feature_id[5025].value ><br>threshold=0.5575815737247467  |
| node_106: feature_name=cg12948116 | feature_id[5360].value <=<br>threshold=0.5658791363239288 |
| node_107: feature_name=cg21906519 | feature_id[5251].value ><br>threshold=0.6089984774589539  |
| node_111: feature_name=cg17537493 | feature_id[4217].value ><br>threshold=0.5825372636318207  |
| node_117: feature_name=cg15720017 | feature_id[4443].value ><br>threshold=0.7009969055652618  |

|                                   |                                                           |
|-----------------------------------|-----------------------------------------------------------|
| node_119: feature_name=cg06038180 | feature_id[3480].value ><br>threshold=0.4583848565816879  |
| node_121: feature_name=cg08619651 | feature_id[4882].value <=<br>threshold=0.2105495035648346 |
| node_122: feature_name=cg01014262 | feature_id[1911].value <=<br>threshold=0.5327437818050385 |
| node_123: feature_name=cg16863382 | feature_id[2922].value ><br>threshold=0.7200668156147003  |
| node_133: feature_name=cg06989443 | feature_id[2327].value <=<br>threshold=0.6579365730285645 |
| node_134: feature_name=cg07344990 | feature_id[2398].value ><br>threshold=0.5562876164913177  |
| node_138: feature_name=cg02966841 | feature_id[2199].value ><br>threshold=0.7744501233100891  |
| node_204: feature_name=cg12120430 | feature_id[3727].value ><br>threshold=0.5775820016860962  |
| node_206: feature_name=cg18386876 | feature_id[4066].value ><br>threshold=0.6847257018089294  |
| node_208: feature_name=cg02053092 | feature_id[3610].value ><br>threshold=0.39507485926151276 |
| node_210: feature_name=cg10298992 | feature_id[3603].value ><br>threshold=0.5707973837852478  |
| node_228: feature_name=cg03840920 | feature_id[4524].value ><br>threshold=0.5365143716335297  |
| node_234: feature_name=cg25364972 | feature_id[1792].value ><br>threshold=0.2418053299188614  |
| node_238: feature_name=cg23485307 | feature_id[221].value ><br>threshold=0.14884746074676514  |
| node_242: feature_name=cg04873169 | feature_id[4696].value ><br>threshold=0.6058756709098816  |
| node_244: feature_name=cg17009731 | feature_id[3218].value ><br>threshold=0.6602252125740051  |
| node_246: feature_name=cg18253910 | feature_id[4458].value <=<br>threshold=0.6904322504997253 |
| node_247: feature_name=cg01559356 | feature_id[3236].value <=<br>threshold=0.089854396879673  |
| Class: osteoblastoma (OB)         |                                                           |
| Rules_137                         | passed counts:1                                           |
| node_0: feature_name=cg11915444   | feature_id[2002].value ><br>threshold=0.3402601182460785  |
| node_10: feature_name=cg26016985  | feature_id[4407].value ><br>threshold=0.6493876278400421  |



|                                   |                                                           |
|-----------------------------------|-----------------------------------------------------------|
| node_16: feature_name=cg23157618  | feature_id[5511].value ><br>threshold=0.5759606957435608  |
| node_20: feature_name=cg10480329  | feature_id[1439].value ><br>threshold=0.5518321692943573  |
| node_48: feature_name=cg17843418  | feature_id[4868].value ><br>threshold=0.34969255328178406 |
| node_52: feature_name=cg24407065  | feature_id[4522].value ><br>threshold=0.5364363789558411  |
| node_56: feature_name=cg07281938  | feature_id[249].value ><br>threshold=0.7506992518901825   |
| node_78: feature_name=cg21759907  | feature_id[1650].value ><br>threshold=0.46823520958423615 |
| node_98: feature_name=cg10886334  | feature_id[3975].value ><br>threshold=0.43698127567768097 |
| node_102: feature_name=cg09373983 | feature_id[5025].value ><br>threshold=0.5575815737247467  |
| node_106: feature_name=cg12948116 | feature_id[5360].value <=<br>threshold=0.5658791363239288 |
| node_107: feature_name=cg21906519 | feature_id[5251].value ><br>threshold=0.6089984774589539  |
| node_111: feature_name=cg17537493 | feature_id[4217].value ><br>threshold=0.5825372636318207  |
| node_117: feature_name=cg15720017 | feature_id[4443].value ><br>threshold=0.7009969055652618  |
| node_119: feature_name=cg06038180 | feature_id[3480].value ><br>threshold=0.4583848565816879  |
| node_121: feature_name=cg08619651 | feature_id[4882].value <=<br>threshold=0.2105495035648346 |
| node_122: feature_name=cg01014262 | feature_id[1911].value <=<br>threshold=0.5327437818050385 |
| node_123: feature_name=cg16863382 | feature_id[2922].value ><br>threshold=0.7200668156147003  |
| node_133: feature_name=cg06989443 | feature_id[2327].value <=<br>threshold=0.6579365730285645 |
| node_134: feature_name=cg07344990 | feature_id[2398].value ><br>threshold=0.5562876164913177  |
| node_138: feature_name=cg02966841 | feature_id[2199].value ><br>threshold=0.7744501233100891  |
| node_204: feature_name=cg12120430 | feature_id[3727].value ><br>threshold=0.5775820016860962  |
| node_206: feature_name=cg18386876 | feature_id[4066].value ><br>threshold=0.6847257018089294  |
| node_208: feature_name=cg02053092 | feature_id[3610].value ><br>threshold=0.39507485926151276 |

|                                               |                                                           |
|-----------------------------------------------|-----------------------------------------------------------|
| node_210: feature_name=cg10298992             | feature_id[3603].value ><br>threshold=0.5707973837852478  |
| node_228: feature_name=cg03840920             | feature_id[4524].value ><br>threshold=0.5365143716335297  |
| node_234: feature_name=cg25364972             | feature_id[1792].value <=<br>threshold=0.2418053299188614 |
| node_235: feature_name=cg07612468             | feature_id[803].value ><br>threshold=0.8302715420722961   |
| Class: mesenchymal chondrosarcoma (CSA (MES)) |                                                           |
|                                               |                                                           |
| Rules_138                                     | passed counts:1                                           |
| node_0: feature_name=cg11915444               | feature_id[2002].value ><br>threshold=0.3402601182460785  |
| node_10: feature_name=cg26016985              | feature_id[4407].value ><br>threshold=0.6493876278400421  |
| node_16: feature_name=cg23157618              | feature_id[5511].value ><br>threshold=0.5759606957435608  |
| node_20: feature_name=cg10480329              | feature_id[1439].value ><br>threshold=0.5518321692943573  |
| node_48: feature_name=cg17843418              | feature_id[4868].value ><br>threshold=0.34969255328178406 |
| node_52: feature_name=cg24407065              | feature_id[4522].value ><br>threshold=0.5364363789558411  |
| node_56: feature_name=cg07281938              | feature_id[249].value ><br>threshold=0.7506992518901825   |
| node_78: feature_name=cg21759907              | feature_id[1650].value ><br>threshold=0.46823520958423615 |
| node_98: feature_name=cg10886334              | feature_id[3975].value ><br>threshold=0.43698127567768097 |
| node_102: feature_name=cg09373983             | feature_id[5025].value ><br>threshold=0.5575815737247467  |
| node_106: feature_name=cg12948116             | feature_id[5360].value <=<br>threshold=0.5658791363239288 |
| node_107: feature_name=cg21906519             | feature_id[5251].value ><br>threshold=0.6089984774589539  |
| node_111: feature_name=cg17537493             | feature_id[4217].value ><br>threshold=0.5825372636318207  |
| node_117: feature_name=cg15720017             | feature_id[4443].value ><br>threshold=0.7009969055652618  |
| node_119: feature_name=cg06038180             | feature_id[3480].value ><br>threshold=0.4583848565816879  |

|                                                         |                                                           |
|---------------------------------------------------------|-----------------------------------------------------------|
| node_121: feature_name=cg08619651                       | feature_id[4882].value <=<br>threshold=0.2105495035648346 |
| node_122: feature_name=cg01014262                       | feature_id[1911].value <=<br>threshold=0.5327437818050385 |
| node_123: feature_name=cg16863382                       | feature_id[2922].value ><br>threshold=0.7200668156147003  |
| node_133: feature_name=cg06989443                       | feature_id[2327].value <=<br>threshold=0.6579365730285645 |
| node_134: feature_name=cg07344990                       | feature_id[2398].value ><br>threshold=0.5562876164913177  |
| node_138: feature_name=cg02966841                       | feature_id[2199].value ><br>threshold=0.7744501233100891  |
| node_204: feature_name=cg12120430                       | feature_id[3727].value ><br>threshold=0.5775820016860962  |
| node_206: feature_name=cg18386876                       | feature_id[4066].value ><br>threshold=0.6847257018089294  |
| node_208: feature_name=cg02053092                       | feature_id[3610].value ><br>threshold=0.39507485926151276 |
| node_210: feature_name=cg10298992                       | feature_id[3603].value ><br>threshold=0.5707973837852478  |
| node_228: feature_name=cg03840920                       | feature_id[4524].value <=<br>threshold=0.5365143716335297 |
| node_229: feature_name=cg21647035                       | feature_id[2479].value ><br>threshold=0.3486105799674988  |
| node_231: feature_name=cg19849478                       | feature_id[105].value ><br>threshold=0.83695188164711     |
| Class: malignant peripheral nerve sheath tumour (MPNST) |                                                           |
|                                                         |                                                           |
| Rules_139                                               | passed counts:1                                           |
| node_0: feature_name=cg11915444                         | feature_id[2002].value ><br>threshold=0.3402601182460785  |
| node_10: feature_name=cg26016985                        | feature_id[4407].value ><br>threshold=0.6493876278400421  |
| node_16: feature_name=cg23157618                        | feature_id[5511].value ><br>threshold=0.5759606957435608  |
| node_20: feature_name=cg10480329                        | feature_id[1439].value ><br>threshold=0.5518321692943573  |
| node_48: feature_name=cg17843418                        | feature_id[4868].value ><br>threshold=0.34969255328178406 |
| node_52: feature_name=cg24407065                        | feature_id[4522].value ><br>threshold=0.5364363789558411  |

|                                   |                                                           |
|-----------------------------------|-----------------------------------------------------------|
| node_56: feature_name=cg07281938  | feature_id[249].value ><br>threshold=0.7506992518901825   |
| node_78: feature_name=cg21759907  | feature_id[1650].value ><br>threshold=0.46823520958423615 |
| node_98: feature_name=cg10886334  | feature_id[3975].value ><br>threshold=0.43698127567768097 |
| node_102: feature_name=cg09373983 | feature_id[5025].value ><br>threshold=0.5575815737247467  |
| node_106: feature_name=cg12948116 | feature_id[5360].value <=<br>threshold=0.5658791363239288 |
| node_107: feature_name=cg21906519 | feature_id[5251].value ><br>threshold=0.6089984774589539  |
| node_111: feature_name=cg17537493 | feature_id[4217].value ><br>threshold=0.5825372636318207  |
| node_117: feature_name=cg15720017 | feature_id[4443].value ><br>threshold=0.7009969055652618  |
| node_119: feature_name=cg06038180 | feature_id[3480].value ><br>threshold=0.4583848565816879  |
| node_121: feature_name=cg08619651 | feature_id[4882].value <=<br>threshold=0.2105495035648346 |
| node_122: feature_name=cg01014262 | feature_id[1911].value <=<br>threshold=0.5327437818050385 |
| node_123: feature_name=cg16863382 | feature_id[2922].value ><br>threshold=0.7200668156147003  |
| node_133: feature_name=cg06989443 | feature_id[2327].value <=<br>threshold=0.6579365730285645 |
| node_134: feature_name=cg07344990 | feature_id[2398].value ><br>threshold=0.5562876164913177  |
| node_138: feature_name=cg02966841 | feature_id[2199].value ><br>threshold=0.7744501233100891  |
| node_204: feature_name=cg12120430 | feature_id[3727].value ><br>threshold=0.5775820016860962  |
| node_206: feature_name=cg18386876 | feature_id[4066].value ><br>threshold=0.6847257018089294  |
| node_208: feature_name=cg02053092 | feature_id[3610].value ><br>threshold=0.39507485926151276 |
| node_210: feature_name=cg10298992 | feature_id[3603].value ><br>threshold=0.5707973837852478  |
| node_228: feature_name=cg03840920 | feature_id[4524].value <=<br>threshold=0.5365143716335297 |
| node_229: feature_name=cg21647035 | feature_id[2479].value ><br>threshold=0.3486105799674988  |
| node_231: feature_name=cg19849478 | feature_id[105].value <=<br>threshold=0.83695188164711    |

|                                              |                                                           |
|----------------------------------------------|-----------------------------------------------------------|
| Class: low-grade fibromyxoid sarcoma (LGFMS) |                                                           |
|                                              |                                                           |
| Rules_140                                    | passed counts:1                                           |
| node_0: feature_name=cg11915444              | feature_id[2002].value ><br>threshold=0.3402601182460785  |
| node_10: feature_name=cg26016985             | feature_id[4407].value ><br>threshold=0.6493876278400421  |
| node_16: feature_name=cg23157618             | feature_id[5511].value ><br>threshold=0.5759606957435608  |
| node_20: feature_name=cg10480329             | feature_id[1439].value ><br>threshold=0.5518321692943573  |
| node_48: feature_name=cg17843418             | feature_id[4868].value ><br>threshold=0.34969255328178406 |
| node_52: feature_name=cg24407065             | feature_id[4522].value ><br>threshold=0.5364363789558411  |
| node_56: feature_name=cg07281938             | feature_id[249].value ><br>threshold=0.7506992518901825   |
| node_78: feature_name=cg21759907             | feature_id[1650].value ><br>threshold=0.46823520958423615 |
| node_98: feature_name=cg10886334             | feature_id[3975].value ><br>threshold=0.43698127567768097 |
| node_102: feature_name=cg09373983            | feature_id[5025].value ><br>threshold=0.5575815737247467  |
| node_106: feature_name=cg12948116            | feature_id[5360].value <=<br>threshold=0.5658791363239288 |
| node_107: feature_name=cg21906519            | feature_id[5251].value ><br>threshold=0.6089984774589539  |
| node_111: feature_name=cg17537493            | feature_id[4217].value ><br>threshold=0.5825372636318207  |
| node_117: feature_name=cg15720017            | feature_id[4443].value ><br>threshold=0.7009969055652618  |
| node_119: feature_name=cg06038180            | feature_id[3480].value ><br>threshold=0.4583848565816879  |
| node_121: feature_name=cg08619651            | feature_id[4882].value <=<br>threshold=0.2105495035648346 |
| node_122: feature_name=cg01014262            | feature_id[1911].value <=<br>threshold=0.5327437818050385 |
| node_123: feature_name=cg16863382            | feature_id[2922].value ><br>threshold=0.7200668156147003  |
| node_133: feature_name=cg06989443            | feature_id[2327].value <=<br>threshold=0.6579365730285645 |
| node_134: feature_name=cg07344990            | feature_id[2398].value ><br>threshold=0.5562876164913177  |

|                                   |                                                            |
|-----------------------------------|------------------------------------------------------------|
| node_138: feature_name=cg02966841 | feature_id[2199].value ><br>threshold=0.7744501233100891   |
| node_204: feature_name=cg12120430 | feature_id[3727].value ><br>threshold=0.5775820016860962   |
| node_206: feature_name=cg18386876 | feature_id[4066].value ><br>threshold=0.6847257018089294   |
| node_208: feature_name=cg02053092 | feature_id[3610].value ><br>threshold=0.39507485926151276  |
| node_210: feature_name=cg10298992 | feature_id[3603].value <=<br>threshold=0.5707973837852478  |
| node_211: feature_name=cg02436098 | feature_id[1712].value ><br>threshold=0.27362556010484695  |
| node_225: feature_name=cg01794853 | feature_id[1531].value <=<br>threshold=0.46636733412742615 |
| Class: lipoma (LIPO)              |                                                            |
| Rules_141                         | passed counts:1                                            |
| node_0: feature_name=cg11915444   | feature_id[2002].value ><br>threshold=0.3402601182460785   |
| node_10: feature_name=cg26016985  | feature_id[4407].value ><br>threshold=0.6493876278400421   |
| node_16: feature_name=cg23157618  | feature_id[5511].value ><br>threshold=0.5759606957435608   |
| node_20: feature_name=cg10480329  | feature_id[1439].value ><br>threshold=0.5518321692943573   |
| node_48: feature_name=cg17843418  | feature_id[4868].value ><br>threshold=0.34969255328178406  |
| node_52: feature_name=cg24407065  | feature_id[4522].value ><br>threshold=0.5364363789558411   |
| node_56: feature_name=cg07281938  | feature_id[249].value ><br>threshold=0.7506992518901825    |
| node_78: feature_name=cg21759907  | feature_id[1650].value ><br>threshold=0.46823520958423615  |
| node_98: feature_name=cg10886334  | feature_id[3975].value ><br>threshold=0.43698127567768097  |
| node_102: feature_name=cg09373983 | feature_id[5025].value ><br>threshold=0.5575815737247467   |
| node_106: feature_name=cg12948116 | feature_id[5360].value <=<br>threshold=0.5658791363239288  |
| node_107: feature_name=cg21906519 | feature_id[5251].value ><br>threshold=0.6089984774589539   |
| node_111: feature_name=cg17537493 | feature_id[4217].value ><br>threshold=0.5825372636318207   |

|                                            |                                                            |
|--------------------------------------------|------------------------------------------------------------|
| node_117: feature_name=cg15720017          | feature_id[4443].value ><br>threshold=0.7009969055652618   |
| node_119: feature_name=cg06038180          | feature_id[3480].value ><br>threshold=0.4583848565816879   |
| node_121: feature_name=cg08619651          | feature_id[4882].value <=<br>threshold=0.2105495035648346  |
| node_122: feature_name=cg01014262          | feature_id[1911].value <=<br>threshold=0.5327437818050385  |
| node_123: feature_name=cg16863382          | feature_id[2922].value ><br>threshold=0.7200668156147003   |
| node_133: feature_name=cg06989443          | feature_id[2327].value <=<br>threshold=0.6579365730285645  |
| node_134: feature_name=cg07344990          | feature_id[2398].value ><br>threshold=0.5562876164913177   |
| node_138: feature_name=cg02966841          | feature_id[2199].value ><br>threshold=0.7744501233100891   |
| node_204: feature_name=cg12120430          | feature_id[3727].value ><br>threshold=0.5775820016860962   |
| node_206: feature_name=cg18386876          | feature_id[4066].value ><br>threshold=0.6847257018089294   |
| node_208: feature_name=cg02053092          | feature_id[3610].value ><br>threshold=0.39507485926151276  |
| node_210: feature_name=cg10298992          | feature_id[3603].value <=<br>threshold=0.5707973837852478  |
| node_211: feature_name=cg02436098          | feature_id[1712].value <=<br>threshold=0.27362556010484695 |
| node_212: feature_name=cg15464763          | feature_id[2786].value ><br>threshold=0.6618955731391907   |
| node_214: feature_name=cg15264991          | feature_id[2805].value <=<br>threshold=0.701563149690628   |
| node_215: feature_name=cg04585669          | feature_id[4112].value ><br>threshold=0.2930298447608948   |
| node_217: feature_name=cg11482422          | feature_id[2778].value <=<br>threshold=0.12514593824744225 |
| node_218: feature_name=cg04046364          | feature_id[1498].value ><br>threshold=0.21376027166843414  |
| node_220: feature_name=cg15420720          | feature_id[1200].value ><br>threshold=0.3182992488145828   |
| Class: Langerhans cell histiocytosis (LCH) |                                                            |
| Rules_142                                  | passed counts:1                                            |
| node_0: feature_name=cg11915444            | feature_id[2002].value ><br>threshold=0.3402601182460785   |

|                                   |                                                           |
|-----------------------------------|-----------------------------------------------------------|
| node_10: feature_name=cg26016985  | feature_id[4407].value ><br>threshold=0.6493876278400421  |
| node_16: feature_name=cg23157618  | feature_id[5511].value ><br>threshold=0.5759606957435608  |
| node_20: feature_name=cg10480329  | feature_id[1439].value ><br>threshold=0.5518321692943573  |
| node_48: feature_name=cg17843418  | feature_id[4868].value ><br>threshold=0.34969255328178406 |
| node_52: feature_name=cg24407065  | feature_id[4522].value ><br>threshold=0.5364363789558411  |
| node_56: feature_name=cg07281938  | feature_id[249].value ><br>threshold=0.7506992518901825   |
| node_78: feature_name=cg21759907  | feature_id[1650].value ><br>threshold=0.46823520958423615 |
| node_98: feature_name=cg10886334  | feature_id[3975].value ><br>threshold=0.43698127567768097 |
| node_102: feature_name=cg09373983 | feature_id[5025].value ><br>threshold=0.5575815737247467  |
| node_106: feature_name=cg12948116 | feature_id[5360].value <=<br>threshold=0.5658791363239288 |
| node_107: feature_name=cg21906519 | feature_id[5251].value ><br>threshold=0.6089984774589539  |
| node_111: feature_name=cg17537493 | feature_id[4217].value ><br>threshold=0.5825372636318207  |
| node_117: feature_name=cg15720017 | feature_id[4443].value ><br>threshold=0.7009969055652618  |
| node_119: feature_name=cg06038180 | feature_id[3480].value ><br>threshold=0.4583848565816879  |
| node_121: feature_name=cg08619651 | feature_id[4882].value <=<br>threshold=0.2105495035648346 |
| node_122: feature_name=cg01014262 | feature_id[1911].value <=<br>threshold=0.5327437818050385 |
| node_123: feature_name=cg16863382 | feature_id[2922].value ><br>threshold=0.7200668156147003  |
| node_133: feature_name=cg06989443 | feature_id[2327].value <=<br>threshold=0.6579365730285645 |
| node_134: feature_name=cg07344990 | feature_id[2398].value ><br>threshold=0.5562876164913177  |
| node_138: feature_name=cg02966841 | feature_id[2199].value ><br>threshold=0.7744501233100891  |
| node_204: feature_name=cg12120430 | feature_id[3727].value ><br>threshold=0.5775820016860962  |
| node_206: feature_name=cg18386876 | feature_id[4066].value ><br>threshold=0.6847257018089294  |



|                                               |                                                            |
|-----------------------------------------------|------------------------------------------------------------|
| node_208: feature_name=cg02053092             | feature_id[3610].value ><br>threshold=0.39507485926151276  |
| node_210: feature_name=cg10298992             | feature_id[3603].value <=<br>threshold=0.5707973837852478  |
| node_211: feature_name=cg02436098             | feature_id[1712].value <=<br>threshold=0.27362556010484695 |
| node_212: feature_name=cg15464763             | feature_id[2786].value ><br>threshold=0.6618955731391907   |
| node_214: feature_name=cg15264991             | feature_id[2805].value <=<br>threshold=0.701563149690628   |
| node_215: feature_name=cg04585669             | feature_id[4112].value ><br>threshold=0.2930298447608948   |
| node_217: feature_name=cg11482422             | feature_id[2778].value <=<br>threshold=0.12514593824744225 |
| node_218: feature_name=cg04046364             | feature_id[1498].value ><br>threshold=0.21376027166843414  |
| node_220: feature_name=cg15420720             | feature_id[1200].value <=<br>threshold=0.3182992488145828  |
| Class: embryonal rhabdomyosarcoma (RMS (EMB)) |                                                            |
|                                               |                                                            |
| Rules_143                                     | passed counts:1                                            |
| node_0: feature_name=cg11915444               | feature_id[2002].value ><br>threshold=0.3402601182460785   |
| node_10: feature_name=cg26016985              | feature_id[4407].value ><br>threshold=0.6493876278400421   |
| node_16: feature_name=cg23157618              | feature_id[5511].value ><br>threshold=0.5759606957435608   |
| node_20: feature_name=cg10480329              | feature_id[1439].value ><br>threshold=0.5518321692943573   |
| node_48: feature_name=cg17843418              | feature_id[4868].value ><br>threshold=0.34969255328178406  |
| node_52: feature_name=cg24407065              | feature_id[4522].value ><br>threshold=0.5364363789558411   |
| node_56: feature_name=cg07281938              | feature_id[249].value ><br>threshold=0.7506992518901825    |
| node_78: feature_name=cg21759907              | feature_id[1650].value ><br>threshold=0.46823520958423615  |
| node_98: feature_name=cg10886334              | feature_id[3975].value ><br>threshold=0.43698127567768097  |
| node_102: feature_name=cg09373983             | feature_id[5025].value ><br>threshold=0.5575815737247467   |

|                                                         |                                                            |
|---------------------------------------------------------|------------------------------------------------------------|
| node_106: feature_name=cg12948116                       | feature_id[5360].value <=<br>threshold=0.5658791363239288  |
| node_107: feature_name=cg21906519                       | feature_id[5251].value ><br>threshold=0.6089984774589539   |
| node_111: feature_name=cg17537493                       | feature_id[4217].value ><br>threshold=0.5825372636318207   |
| node_117: feature_name=cg15720017                       | feature_id[4443].value ><br>threshold=0.7009969055652618   |
| node_119: feature_name=cg06038180                       | feature_id[3480].value ><br>threshold=0.4583848565816879   |
| node_121: feature_name=cg08619651                       | feature_id[4882].value <=<br>threshold=0.2105495035648346  |
| node_122: feature_name=cg01014262                       | feature_id[1911].value <=<br>threshold=0.5327437818050385  |
| node_123: feature_name=cg16863382                       | feature_id[2922].value ><br>threshold=0.7200668156147003   |
| node_133: feature_name=cg06989443                       | feature_id[2327].value <=<br>threshold=0.6579365730285645  |
| node_134: feature_name=cg07344990                       | feature_id[2398].value ><br>threshold=0.5562876164913177   |
| node_138: feature_name=cg02966841                       | feature_id[2199].value ><br>threshold=0.7744501233100891   |
| node_204: feature_name=cg12120430                       | feature_id[3727].value ><br>threshold=0.5775820016860962   |
| node_206: feature_name=cg18386876                       | feature_id[4066].value ><br>threshold=0.6847257018089294   |
| node_208: feature_name=cg02053092                       | feature_id[3610].value ><br>threshold=0.39507485926151276  |
| node_210: feature_name=cg10298992                       | feature_id[3603].value <=<br>threshold=0.5707973837852478  |
| node_211: feature_name=cg02436098                       | feature_id[1712].value <=<br>threshold=0.27362556010484695 |
| node_212: feature_name=cg15464763                       | feature_id[2786].value ><br>threshold=0.6618955731391907   |
| node_214: feature_name=cg15264991                       | feature_id[2805].value <=<br>threshold=0.701563149690628   |
| node_215: feature_name=cg04585669                       | feature_id[4112].value ><br>threshold=0.2930298447608948   |
| node_217: feature_name=cg11482422                       | feature_id[2778].value <=<br>threshold=0.12514593824744225 |
| node_218: feature_name=cg04046364                       | feature_id[1498].value <=<br>threshold=0.21376027166843414 |
| Class: malignant peripheral nerve sheath tumour (MPNST) |                                                            |

|                                   |                                                           |
|-----------------------------------|-----------------------------------------------------------|
| Rules_144                         | passed counts:1                                           |
| node_0: feature_name=cg11915444   | feature_id[2002].value ><br>threshold=0.3402601182460785  |
| node_10: feature_name=cg26016985  | feature_id[4407].value ><br>threshold=0.6493876278400421  |
| node_16: feature_name=cg23157618  | feature_id[5511].value ><br>threshold=0.5759606957435608  |
| node_20: feature_name=cg10480329  | feature_id[1439].value ><br>threshold=0.5518321692943573  |
| node_48: feature_name=cg17843418  | feature_id[4868].value ><br>threshold=0.34969255328178406 |
| node_52: feature_name=cg24407065  | feature_id[4522].value ><br>threshold=0.5364363789558411  |
| node_56: feature_name=cg07281938  | feature_id[249].value ><br>threshold=0.7506992518901825   |
| node_78: feature_name=cg21759907  | feature_id[1650].value ><br>threshold=0.46823520958423615 |
| node_98: feature_name=cg10886334  | feature_id[3975].value ><br>threshold=0.43698127567768097 |
| node_102: feature_name=cg09373983 | feature_id[5025].value ><br>threshold=0.5575815737247467  |
| node_106: feature_name=cg12948116 | feature_id[5360].value <=<br>threshold=0.5658791363239288 |
| node_107: feature_name=cg21906519 | feature_id[5251].value ><br>threshold=0.6089984774589539  |
| node_111: feature_name=cg17537493 | feature_id[4217].value ><br>threshold=0.5825372636318207  |
| node_117: feature_name=cg15720017 | feature_id[4443].value ><br>threshold=0.7009969055652618  |
| node_119: feature_name=cg06038180 | feature_id[3480].value ><br>threshold=0.4583848565816879  |
| node_121: feature_name=cg08619651 | feature_id[4882].value <=<br>threshold=0.2105495035648346 |
| node_122: feature_name=cg01014262 | feature_id[1911].value <=<br>threshold=0.5327437818050385 |
| node_123: feature_name=cg16863382 | feature_id[2922].value ><br>threshold=0.7200668156147003  |
| node_133: feature_name=cg06989443 | feature_id[2327].value <=<br>threshold=0.6579365730285645 |
| node_134: feature_name=cg07344990 | feature_id[2398].value ><br>threshold=0.5562876164913177  |

|                                                                         |                                                           |
|-------------------------------------------------------------------------|-----------------------------------------------------------|
| node_138: feature_name=cg02966841                                       | feature_id[2199].value <=<br>threshold=0.7744501233100891 |
| node_139: feature_name=cg06989253                                       | feature_id[194].value ><br>threshold=0.7899391353130341   |
| node_171: feature_name=cg07041720                                       | feature_id[932].value ><br>threshold=0.5004830807447433   |
| node_189: feature_name=cg19374752                                       | feature_id[196].value <=<br>threshold=0.6096120476722717  |
| node_190: feature_name=cg23085846                                       | feature_id[3499].value <=<br>threshold=0.8292354643344879 |
| node_191: feature_name=cg04508340                                       | feature_id[3427].value <=<br>threshold=0.8703204989433289 |
| node_192: feature_name=cg05951828                                       | feature_id[21].value ><br>threshold=0.8927997946739197    |
| node_194: feature_name=cg16239826                                       | feature_id[5096].value ><br>threshold=0.6628752052783966  |
| node_196: feature_name=cg17616283                                       | feature_id[3747].value ><br>threshold=0.23580453544855118 |
| node_198: feature_name=cg03550233                                       | feature_id[1927].value ><br>threshold=0.27456413209438324 |
| Class: atypical fibroxanthoma<br>(AFX)/pleomorphic dermal sarcoma (PDS) |                                                           |
|                                                                         |                                                           |
| Rules_145                                                               | passed counts:1                                           |
| node_0: feature_name=cg11915444                                         | feature_id[2002].value ><br>threshold=0.3402601182460785  |
| node_10: feature_name=cg26016985                                        | feature_id[4407].value ><br>threshold=0.6493876278400421  |
| node_16: feature_name=cg23157618                                        | feature_id[5511].value ><br>threshold=0.5759606957435608  |
| node_20: feature_name=cg10480329                                        | feature_id[1439].value ><br>threshold=0.5518321692943573  |
| node_48: feature_name=cg17843418                                        | feature_id[4868].value ><br>threshold=0.34969255328178406 |
| node_52: feature_name=cg24407065                                        | feature_id[4522].value ><br>threshold=0.5364363789558411  |
| node_56: feature_name=cg07281938                                        | feature_id[249].value ><br>threshold=0.7506992518901825   |
| node_78: feature_name=cg21759907                                        | feature_id[1650].value ><br>threshold=0.46823520958423615 |
| node_98: feature_name=cg10886334                                        | feature_id[3975].value ><br>threshold=0.43698127567768097 |

|                                                 |                                                            |
|-------------------------------------------------|------------------------------------------------------------|
| node_102: feature_name=cg09373983               | feature_id[5025].value ><br>threshold=0.5575815737247467   |
| node_106: feature_name=cg12948116               | feature_id[5360].value <=<br>threshold=0.5658791363239288  |
| node_107: feature_name=cg21906519               | feature_id[5251].value ><br>threshold=0.6089984774589539   |
| node_111: feature_name=cg17537493               | feature_id[4217].value ><br>threshold=0.5825372636318207   |
| node_117: feature_name=cg15720017               | feature_id[4443].value ><br>threshold=0.7009969055652618   |
| node_119: feature_name=cg06038180               | feature_id[3480].value ><br>threshold=0.4583848565816879   |
| node_121: feature_name=cg08619651               | feature_id[4882].value <=<br>threshold=0.2105495035648346  |
| node_122: feature_name=cg01014262               | feature_id[1911].value <=<br>threshold=0.5327437818050385  |
| node_123: feature_name=cg16863382               | feature_id[2922].value ><br>threshold=0.7200668156147003   |
| node_133: feature_name=cg06989443               | feature_id[2327].value <=<br>threshold=0.6579365730285645  |
| node_134: feature_name=cg07344990               | feature_id[2398].value ><br>threshold=0.5562876164913177   |
| node_138: feature_name=cg02966841               | feature_id[2199].value <=<br>threshold=0.7744501233100891  |
| node_139: feature_name=cg06989253               | feature_id[194].value ><br>threshold=0.7899391353130341    |
| node_171: feature_name=cg07041720               | feature_id[932].value ><br>threshold=0.5004830807447433    |
| node_189: feature_name=cg19374752               | feature_id[196].value <=<br>threshold=0.6096120476722717   |
| node_190: feature_name=cg23085846               | feature_id[3499].value <=<br>threshold=0.8292354643344879  |
| node_191: feature_name=cg04508340               | feature_id[3427].value <=<br>threshold=0.8703204989433289  |
| node_192: feature_name=cg05951828               | feature_id[21].value ><br>threshold=0.8927997946739197     |
| node_194: feature_name=cg16239826               | feature_id[5096].value ><br>threshold=0.6628752052783966   |
| node_196: feature_name=cg17616283               | feature_id[3747].value ><br>threshold=0.23580453544855118  |
| node_198: feature_name=cg03550233               | feature_id[1927].value <=<br>threshold=0.27456413209438324 |
| Class: sclerosing epithelioid fibrosarcoma(SEF) |                                                            |

|                                   |                                                           |
|-----------------------------------|-----------------------------------------------------------|
|                                   |                                                           |
| Rules_146                         | passed counts:1                                           |
| node_0: feature_name=cg11915444   | feature_id[2002].value ><br>threshold=0.3402601182460785  |
| node_10: feature_name=cg26016985  | feature_id[4407].value ><br>threshold=0.6493876278400421  |
| node_16: feature_name=cg23157618  | feature_id[5511].value ><br>threshold=0.5759606957435608  |
| node_20: feature_name=cg10480329  | feature_id[1439].value ><br>threshold=0.5518321692943573  |
| node_48: feature_name=cg17843418  | feature_id[4868].value ><br>threshold=0.34969255328178406 |
| node_52: feature_name=cg24407065  | feature_id[4522].value ><br>threshold=0.5364363789558411  |
| node_56: feature_name=cg07281938  | feature_id[249].value ><br>threshold=0.7506992518901825   |
| node_78: feature_name=cg21759907  | feature_id[1650].value ><br>threshold=0.46823520958423615 |
| node_98: feature_name=cg10886334  | feature_id[3975].value ><br>threshold=0.43698127567768097 |
| node_102: feature_name=cg09373983 | feature_id[5025].value ><br>threshold=0.5575815737247467  |
| node_106: feature_name=cg12948116 | feature_id[5360].value <=<br>threshold=0.5658791363239288 |
| node_107: feature_name=cg21906519 | feature_id[5251].value ><br>threshold=0.6089984774589539  |
| node_111: feature_name=cg17537493 | feature_id[4217].value ><br>threshold=0.5825372636318207  |
| node_117: feature_name=cg15720017 | feature_id[4443].value ><br>threshold=0.7009969055652618  |
| node_119: feature_name=cg06038180 | feature_id[3480].value ><br>threshold=0.4583848565816879  |
| node_121: feature_name=cg08619651 | feature_id[4882].value <=<br>threshold=0.2105495035648346 |
| node_122: feature_name=cg01014262 | feature_id[1911].value <=<br>threshold=0.5327437818050385 |
| node_123: feature_name=cg16863382 | feature_id[2922].value ><br>threshold=0.7200668156147003  |
| node_133: feature_name=cg06989443 | feature_id[2327].value <=<br>threshold=0.6579365730285645 |
| node_134: feature_name=cg07344990 | feature_id[2398].value ><br>threshold=0.5562876164913177  |

|                                                  |                                                            |
|--------------------------------------------------|------------------------------------------------------------|
| node_138: feature_name=cg02966841                | feature_id[2199].value <=<br>threshold=0.7744501233100891  |
| node_139: feature_name=cg06989253                | feature_id[194].value ><br>threshold=0.7899391353130341    |
| node_171: feature_name=cg07041720                | feature_id[932].value ><br>threshold=0.5004830807447433    |
| node_189: feature_name=cg19374752                | feature_id[196].value <=<br>threshold=0.6096120476722717   |
| node_190: feature_name=cg23085846                | feature_id[3499].value <=<br>threshold=0.8292354643344879  |
| node_191: feature_name=cg04508340                | feature_id[3427].value <=<br>threshold=0.8703204989433289  |
| node_192: feature_name=cg05951828                | feature_id[21].value ><br>threshold=0.8927997946739197     |
| node_194: feature_name=cg16239826                | feature_id[5096].value ><br>threshold=0.6628752052783966   |
| node_196: feature_name=cg17616283                | feature_id[3747].value <=<br>threshold=0.23580453544855118 |
| Class: inflammatory myofibroblastic tumour (IMT) |                                                            |
|                                                  |                                                            |
| Rules_147                                        | passed counts:1                                            |
| node_0: feature_name=cg11915444                  | feature_id[2002].value ><br>threshold=0.3402601182460785   |
| node_10: feature_name=cg26016985                 | feature_id[4407].value ><br>threshold=0.6493876278400421   |
| node_16: feature_name=cg23157618                 | feature_id[5511].value ><br>threshold=0.5759606957435608   |
| node_20: feature_name=cg10480329                 | feature_id[1439].value ><br>threshold=0.5518321692943573   |
| node_48: feature_name=cg17843418                 | feature_id[4868].value ><br>threshold=0.34969255328178406  |
| node_52: feature_name=cg24407065                 | feature_id[4522].value ><br>threshold=0.5364363789558411   |
| node_56: feature_name=cg07281938                 | feature_id[249].value ><br>threshold=0.7506992518901825    |
| node_78: feature_name=cg21759907                 | feature_id[1650].value ><br>threshold=0.46823520958423615  |
| node_98: feature_name=cg10886334                 | feature_id[3975].value ><br>threshold=0.43698127567768097  |
| node_102: feature_name=cg09373983                | feature_id[5025].value ><br>threshold=0.5575815737247467   |

|                                   |                                                           |
|-----------------------------------|-----------------------------------------------------------|
| node_106: feature_name=cg12948116 | feature_id[5360].value <=<br>threshold=0.5658791363239288 |
| node_107: feature_name=cg21906519 | feature_id[5251].value ><br>threshold=0.6089984774589539  |
| node_111: feature_name=cg17537493 | feature_id[4217].value ><br>threshold=0.5825372636318207  |
| node_117: feature_name=cg15720017 | feature_id[4443].value ><br>threshold=0.7009969055652618  |
| node_119: feature_name=cg06038180 | feature_id[3480].value ><br>threshold=0.4583848565816879  |
| node_121: feature_name=cg08619651 | feature_id[4882].value <=<br>threshold=0.2105495035648346 |
| node_122: feature_name=cg01014262 | feature_id[1911].value <=<br>threshold=0.5327437818050385 |
| node_123: feature_name=cg16863382 | feature_id[2922].value ><br>threshold=0.7200668156147003  |
| node_133: feature_name=cg06989443 | feature_id[2327].value <=<br>threshold=0.6579365730285645 |
| node_134: feature_name=cg07344990 | feature_id[2398].value ><br>threshold=0.5562876164913177  |
| node_138: feature_name=cg02966841 | feature_id[2199].value <=<br>threshold=0.7744501233100891 |
| node_139: feature_name=cg06989253 | feature_id[194].value ><br>threshold=0.7899391353130341   |
| node_171: feature_name=cg07041720 | feature_id[932].value ><br>threshold=0.5004830807447433   |
| node_189: feature_name=cg19374752 | feature_id[196].value <=<br>threshold=0.6096120476722717  |
| node_190: feature_name=cg23085846 | feature_id[3499].value <=<br>threshold=0.8292354643344879 |
| node_191: feature_name=cg04508340 | feature_id[3427].value <=<br>threshold=0.8703204989433289 |
| node_192: feature_name=cg05951828 | feature_id[21].value ><br>threshold=0.8927997946739197    |
| node_194: feature_name=cg16239826 | feature_id[5096].value <=<br>threshold=0.6628752052783966 |
| Class: epithelioid sarcoma (ES)   |                                                           |
|                                   |                                                           |
| Rules_148                         | passed counts:1                                           |
| node_0: feature_name=cg11915444   | feature_id[2002].value ><br>threshold=0.3402601182460785  |
| node_10: feature_name=cg26016985  | feature_id[4407].value ><br>threshold=0.6493876278400421  |



|                                   |                                                           |
|-----------------------------------|-----------------------------------------------------------|
| node_16: feature_name=cg23157618  | feature_id[5511].value ><br>threshold=0.5759606957435608  |
| node_20: feature_name=cg10480329  | feature_id[1439].value ><br>threshold=0.5518321692943573  |
| node_48: feature_name=cg17843418  | feature_id[4868].value ><br>threshold=0.34969255328178406 |
| node_52: feature_name=cg24407065  | feature_id[4522].value ><br>threshold=0.5364363789558411  |
| node_56: feature_name=cg07281938  | feature_id[249].value ><br>threshold=0.7506992518901825   |
| node_78: feature_name=cg21759907  | feature_id[1650].value ><br>threshold=0.46823520958423615 |
| node_98: feature_name=cg10886334  | feature_id[3975].value ><br>threshold=0.43698127567768097 |
| node_102: feature_name=cg09373983 | feature_id[5025].value ><br>threshold=0.5575815737247467  |
| node_106: feature_name=cg12948116 | feature_id[5360].value <=<br>threshold=0.5658791363239288 |
| node_107: feature_name=cg21906519 | feature_id[5251].value ><br>threshold=0.6089984774589539  |
| node_111: feature_name=cg17537493 | feature_id[4217].value ><br>threshold=0.5825372636318207  |
| node_117: feature_name=cg15720017 | feature_id[4443].value ><br>threshold=0.7009969055652618  |
| node_119: feature_name=cg06038180 | feature_id[3480].value ><br>threshold=0.4583848565816879  |
| node_121: feature_name=cg08619651 | feature_id[4882].value <=<br>threshold=0.2105495035648346 |
| node_122: feature_name=cg01014262 | feature_id[1911].value <=<br>threshold=0.5327437818050385 |
| node_123: feature_name=cg16863382 | feature_id[2922].value ><br>threshold=0.7200668156147003  |
| node_133: feature_name=cg06989443 | feature_id[2327].value <=<br>threshold=0.6579365730285645 |
| node_134: feature_name=cg07344990 | feature_id[2398].value ><br>threshold=0.5562876164913177  |
| node_138: feature_name=cg02966841 | feature_id[2199].value <=<br>threshold=0.7744501233100891 |
| node_139: feature_name=cg06989253 | feature_id[194].value ><br>threshold=0.7899391353130341   |
| node_171: feature_name=cg07041720 | feature_id[932].value <=<br>threshold=0.5004830807447433  |
| node_172: feature_name=cg04716580 | feature_id[1390].value ><br>threshold=0.8913259208202362  |

|                                         |                                                            |
|-----------------------------------------|------------------------------------------------------------|
| node_182: feature_name=cg24426483       | feature_id[3487].value ><br>threshold=0.7537154853343964   |
| node_186: feature_name=cg11847597       | feature_id[2502].value <=<br>threshold=0.49640630185604095 |
| Class: giant cell tumour of bone (GCTB) |                                                            |
| Rules_149                               | passed counts:1                                            |
| node_0: feature_name=cg11915444         | feature_id[2002].value ><br>threshold=0.3402601182460785   |
| node_10: feature_name=cg26016985        | feature_id[4407].value ><br>threshold=0.6493876278400421   |
| node_16: feature_name=cg23157618        | feature_id[5511].value ><br>threshold=0.5759606957435608   |
| node_20: feature_name=cg10480329        | feature_id[1439].value ><br>threshold=0.5518321692943573   |
| node_48: feature_name=cg17843418        | feature_id[4868].value ><br>threshold=0.34969255328178406  |
| node_52: feature_name=cg24407065        | feature_id[4522].value ><br>threshold=0.5364363789558411   |
| node_56: feature_name=cg07281938        | feature_id[249].value ><br>threshold=0.7506992518901825    |
| node_78: feature_name=cg21759907        | feature_id[1650].value ><br>threshold=0.46823520958423615  |
| node_98: feature_name=cg10886334        | feature_id[3975].value ><br>threshold=0.43698127567768097  |
| node_102: feature_name=cg09373983       | feature_id[5025].value ><br>threshold=0.5575815737247467   |
| node_106: feature_name=cg12948116       | feature_id[5360].value <=<br>threshold=0.5658791363239288  |
| node_107: feature_name=cg21906519       | feature_id[5251].value ><br>threshold=0.6089984774589539   |
| node_111: feature_name=cg17537493       | feature_id[4217].value ><br>threshold=0.5825372636318207   |
| node_117: feature_name=cg15720017       | feature_id[4443].value ><br>threshold=0.7009969055652618   |
| node_119: feature_name=cg06038180       | feature_id[3480].value ><br>threshold=0.4583848565816879   |
| node_121: feature_name=cg08619651       | feature_id[4882].value <=<br>threshold=0.2105495035648346  |
| node_122: feature_name=cg01014262       | feature_id[1911].value <=<br>threshold=0.5327437818050385  |
| node_123: feature_name=cg16863382       | feature_id[2922].value ><br>threshold=0.7200668156147003   |

|                                   |                                                           |
|-----------------------------------|-----------------------------------------------------------|
| node_133: feature_name=cg06989443 | feature_id[2327].value <=<br>threshold=0.6579365730285645 |
| node_134: feature_name=cg07344990 | feature_id[2398].value ><br>threshold=0.5562876164913177  |
| node_138: feature_name=cg02966841 | feature_id[2199].value <=<br>threshold=0.7744501233100891 |
| node_139: feature_name=cg06989253 | feature_id[194].value ><br>threshold=0.7899391353130341   |
| node_171: feature_name=cg07041720 | feature_id[932].value <=<br>threshold=0.5004830807447433  |
| node_172: feature_name=cg04716580 | feature_id[1390].value ><br>threshold=0.8913259208202362  |
| node_182: feature_name=cg24426483 | feature_id[3487].value <=<br>threshold=0.7537154853343964 |
| node_183: feature_name=cg14753356 | feature_id[385].value ><br>threshold=0.3692520558834076   |
| Class: sarcoma (SARC)             |                                                           |
|                                   |                                                           |
| Rules_150                         | passed counts:1                                           |
| node_0: feature_name=cg11915444   | feature_id[2002].value ><br>threshold=0.3402601182460785  |
| node_10: feature_name=cg26016985  | feature_id[4407].value ><br>threshold=0.6493876278400421  |
| node_16: feature_name=cg23157618  | feature_id[5511].value ><br>threshold=0.5759606957435608  |
| node_20: feature_name=cg10480329  | feature_id[1439].value ><br>threshold=0.5518321692943573  |
| node_48: feature_name=cg17843418  | feature_id[4868].value ><br>threshold=0.34969255328178406 |
| node_52: feature_name=cg24407065  | feature_id[4522].value ><br>threshold=0.5364363789558411  |
| node_56: feature_name=cg07281938  | feature_id[249].value ><br>threshold=0.7506992518901825   |
| node_78: feature_name=cg21759907  | feature_id[1650].value ><br>threshold=0.46823520958423615 |
| node_98: feature_name=cg10886334  | feature_id[3975].value ><br>threshold=0.43698127567768097 |
| node_102: feature_name=cg09373983 | feature_id[5025].value ><br>threshold=0.5575815737247467  |
| node_106: feature_name=cg12948116 | feature_id[5360].value <=<br>threshold=0.5658791363239288 |
| node_107: feature_name=cg21906519 | feature_id[5251].value ><br>threshold=0.6089984774589539  |

|                                                                         |                                                           |
|-------------------------------------------------------------------------|-----------------------------------------------------------|
| node_111: feature_name=cg17537493                                       | feature_id[4217].value ><br>threshold=0.5825372636318207  |
| node_117: feature_name=cg15720017                                       | feature_id[4443].value ><br>threshold=0.7009969055652618  |
| node_119: feature_name=cg06038180                                       | feature_id[3480].value ><br>threshold=0.4583848565816879  |
| node_121: feature_name=cg08619651                                       | feature_id[4882].value <=<br>threshold=0.2105495035648346 |
| node_122: feature_name=cg01014262                                       | feature_id[1911].value <=<br>threshold=0.5327437818050385 |
| node_123: feature_name=cg16863382                                       | feature_id[2922].value ><br>threshold=0.7200668156147003  |
| node_133: feature_name=cg06989443                                       | feature_id[2327].value <=<br>threshold=0.6579365730285645 |
| node_134: feature_name=cg07344990                                       | feature_id[2398].value ><br>threshold=0.5562876164913177  |
| node_138: feature_name=cg02966841                                       | feature_id[2199].value <=<br>threshold=0.7744501233100891 |
| node_139: feature_name=cg06989253                                       | feature_id[194].value ><br>threshold=0.7899391353130341   |
| node_171: feature_name=cg07041720                                       | feature_id[932].value <=<br>threshold=0.5004830807447433  |
| node_172: feature_name=cg04716580                                       | feature_id[1390].value <=<br>threshold=0.8913259208202362 |
| node_173: feature_name=cg12183501                                       | feature_id[1208].value ><br>threshold=0.1898196041584015  |
| node_175: feature_name=cg25066857                                       | feature_id[3535].value ><br>threshold=0.6125359833240509  |
| node_177: feature_name=cg19604110                                       | feature_id[2693].value ><br>threshold=0.193588025867939   |
| node_179: feature_name=cg25413575                                       | feature_id[3277].value ><br>threshold=0.7227720022201538  |
| Class: atypical fibroxanthoma<br>(AFX)/pleomorphic dermal sarcoma (PDS) |                                                           |
|                                                                         |                                                           |
| Rules_151                                                               | passed counts:1                                           |
| node_0: feature_name=cg11915444                                         | feature_id[2002].value ><br>threshold=0.3402601182460785  |
| node_10: feature_name=cg26016985                                        | feature_id[4407].value ><br>threshold=0.6493876278400421  |
| node_16: feature_name=cg23157618                                        | feature_id[5511].value ><br>threshold=0.5759606957435608  |

|                                   |                                                           |
|-----------------------------------|-----------------------------------------------------------|
| node_20: feature_name=cg10480329  | feature_id[1439].value ><br>threshold=0.5518321692943573  |
| node_48: feature_name=cg17843418  | feature_id[4868].value ><br>threshold=0.34969255328178406 |
| node_52: feature_name=cg24407065  | feature_id[4522].value ><br>threshold=0.5364363789558411  |
| node_56: feature_name=cg07281938  | feature_id[249].value ><br>threshold=0.7506992518901825   |
| node_78: feature_name=cg21759907  | feature_id[1650].value ><br>threshold=0.46823520958423615 |
| node_98: feature_name=cg10886334  | feature_id[3975].value ><br>threshold=0.43698127567768097 |
| node_102: feature_name=cg09373983 | feature_id[5025].value ><br>threshold=0.5575815737247467  |
| node_106: feature_name=cg12948116 | feature_id[5360].value <=<br>threshold=0.5658791363239288 |
| node_107: feature_name=cg21906519 | feature_id[5251].value ><br>threshold=0.6089984774589539  |
| node_111: feature_name=cg17537493 | feature_id[4217].value ><br>threshold=0.5825372636318207  |
| node_117: feature_name=cg15720017 | feature_id[4443].value ><br>threshold=0.7009969055652618  |
| node_119: feature_name=cg06038180 | feature_id[3480].value ><br>threshold=0.4583848565816879  |
| node_121: feature_name=cg08619651 | feature_id[4882].value <=<br>threshold=0.2105495035648346 |
| node_122: feature_name=cg01014262 | feature_id[1911].value <=<br>threshold=0.5327437818050385 |
| node_123: feature_name=cg16863382 | feature_id[2922].value ><br>threshold=0.7200668156147003  |
| node_133: feature_name=cg06989443 | feature_id[2327].value <=<br>threshold=0.6579365730285645 |
| node_134: feature_name=cg07344990 | feature_id[2398].value ><br>threshold=0.5562876164913177  |
| node_138: feature_name=cg02966841 | feature_id[2199].value <=<br>threshold=0.7744501233100891 |
| node_139: feature_name=cg06989253 | feature_id[194].value ><br>threshold=0.7899391353130341   |
| node_171: feature_name=cg07041720 | feature_id[932].value <=<br>threshold=0.5004830807447433  |
| node_172: feature_name=cg04716580 | feature_id[1390].value <=<br>threshold=0.8913259208202362 |
| node_173: feature_name=cg12183501 | feature_id[1208].value ><br>threshold=0.1898196041584015  |

|                                   |                                                           |
|-----------------------------------|-----------------------------------------------------------|
| node_175: feature_name=cg25066857 | feature_id[3535].value ><br>threshold=0.6125359833240509  |
| node_177: feature_name=cg19604110 | feature_id[2693].value ><br>threshold=0.193588025867939   |
| node_179: feature_name=cg25413575 | feature_id[3277].value <=<br>threshold=0.7227720022201538 |
| Class: sarcoma (SARC)             |                                                           |
| Rules_152                         | passed counts:1                                           |
| node_0: feature_name=cg11915444   | feature_id[2002].value ><br>threshold=0.3402601182460785  |
| node_10: feature_name=cg26016985  | feature_id[4407].value ><br>threshold=0.6493876278400421  |
| node_16: feature_name=cg23157618  | feature_id[5511].value ><br>threshold=0.5759606957435608  |
| node_20: feature_name=cg10480329  | feature_id[1439].value ><br>threshold=0.5518321692943573  |
| node_48: feature_name=cg17843418  | feature_id[4868].value ><br>threshold=0.34969255328178406 |
| node_52: feature_name=cg24407065  | feature_id[4522].value ><br>threshold=0.5364363789558411  |
| node_56: feature_name=cg07281938  | feature_id[249].value ><br>threshold=0.7506992518901825   |
| node_78: feature_name=cg21759907  | feature_id[1650].value ><br>threshold=0.46823520958423615 |
| node_98: feature_name=cg10886334  | feature_id[3975].value ><br>threshold=0.43698127567768097 |
| node_102: feature_name=cg09373983 | feature_id[5025].value ><br>threshold=0.5575815737247467  |
| node_106: feature_name=cg12948116 | feature_id[5360].value <=<br>threshold=0.5658791363239288 |
| node_107: feature_name=cg21906519 | feature_id[5251].value ><br>threshold=0.6089984774589539  |
| node_111: feature_name=cg17537493 | feature_id[4217].value ><br>threshold=0.5825372636318207  |
| node_117: feature_name=cg15720017 | feature_id[4443].value ><br>threshold=0.7009969055652618  |
| node_119: feature_name=cg06038180 | feature_id[3480].value ><br>threshold=0.4583848565816879  |
| node_121: feature_name=cg08619651 | feature_id[4882].value <=<br>threshold=0.2105495035648346 |
| node_122: feature_name=cg01014262 | feature_id[1911].value <=<br>threshold=0.5327437818050385 |

|                                                 |                                                           |
|-------------------------------------------------|-----------------------------------------------------------|
| node_123: feature_name=cg16863382               | feature_id[2922].value ><br>threshold=0.7200668156147003  |
| node_133: feature_name=cg06989443               | feature_id[2327].value <=<br>threshold=0.6579365730285645 |
| node_134: feature_name=cg07344990               | feature_id[2398].value ><br>threshold=0.5562876164913177  |
| node_138: feature_name=cg02966841               | feature_id[2199].value <=<br>threshold=0.7744501233100891 |
| node_139: feature_name=cg06989253               | feature_id[194].value ><br>threshold=0.7899391353130341   |
| node_171: feature_name=cg07041720               | feature_id[932].value <=<br>threshold=0.5004830807447433  |
| node_172: feature_name=cg04716580               | feature_id[1390].value <=<br>threshold=0.8913259208202362 |
| node_173: feature_name=cg12183501               | feature_id[1208].value ><br>threshold=0.1898196041584015  |
| node_175: feature_name=cg25066857               | feature_id[3535].value ><br>threshold=0.6125359833240509  |
| node_177: feature_name=cg19604110               | feature_id[2693].value <=<br>threshold=0.193588025867939  |
| Class: sclerosing epithelioid fibrosarcoma(SEF) |                                                           |
|                                                 |                                                           |
| Rules_153                                       | passed counts:1                                           |
| node_0: feature_name=cg11915444                 | feature_id[2002].value ><br>threshold=0.3402601182460785  |
| node_10: feature_name=cg26016985                | feature_id[4407].value ><br>threshold=0.6493876278400421  |
| node_16: feature_name=cg23157618                | feature_id[5511].value ><br>threshold=0.5759606957435608  |
| node_20: feature_name=cg10480329                | feature_id[1439].value ><br>threshold=0.5518321692943573  |
| node_48: feature_name=cg17843418                | feature_id[4868].value ><br>threshold=0.34969255328178406 |
| node_52: feature_name=cg24407065                | feature_id[4522].value ><br>threshold=0.5364363789558411  |
| node_56: feature_name=cg07281938                | feature_id[249].value ><br>threshold=0.7506992518901825   |
| node_78: feature_name=cg21759907                | feature_id[1650].value ><br>threshold=0.46823520958423615 |
| node_98: feature_name=cg10886334                | feature_id[3975].value ><br>threshold=0.43698127567768097 |
| node_102: feature_name=cg09373983               | feature_id[5025].value ><br>threshold=0.5575815737247467  |

|                                   |                                                           |
|-----------------------------------|-----------------------------------------------------------|
| node_106: feature_name=cg12948116 | feature_id[5360].value <=<br>threshold=0.5658791363239288 |
| node_107: feature_name=cg21906519 | feature_id[5251].value ><br>threshold=0.6089984774589539  |
| node_111: feature_name=cg17537493 | feature_id[4217].value ><br>threshold=0.5825372636318207  |
| node_117: feature_name=cg15720017 | feature_id[4443].value ><br>threshold=0.7009969055652618  |
| node_119: feature_name=cg06038180 | feature_id[3480].value ><br>threshold=0.4583848565816879  |
| node_121: feature_name=cg08619651 | feature_id[4882].value <=<br>threshold=0.2105495035648346 |
| node_122: feature_name=cg01014262 | feature_id[1911].value <=<br>threshold=0.5327437818050385 |
| node_123: feature_name=cg16863382 | feature_id[2922].value ><br>threshold=0.7200668156147003  |
| node_133: feature_name=cg06989443 | feature_id[2327].value <=<br>threshold=0.6579365730285645 |
| node_134: feature_name=cg07344990 | feature_id[2398].value ><br>threshold=0.5562876164913177  |
| node_138: feature_name=cg02966841 | feature_id[2199].value <=<br>threshold=0.7744501233100891 |
| node_139: feature_name=cg06989253 | feature_id[194].value ><br>threshold=0.7899391353130341   |
| node_171: feature_name=cg07041720 | feature_id[932].value <=<br>threshold=0.5004830807447433  |
| node_172: feature_name=cg04716580 | feature_id[1390].value <=<br>threshold=0.8913259208202362 |
| node_173: feature_name=cg12183501 | feature_id[1208].value ><br>threshold=0.1898196041584015  |
| node_175: feature_name=cg25066857 | feature_id[3535].value <=<br>threshold=0.6125359833240509 |
| Class: leiomyosarcoma (LMS)       |                                                           |
| Rules_154                         | passed counts:1                                           |
| node_0: feature_name=cg11915444   | feature_id[2002].value ><br>threshold=0.3402601182460785  |
| node_10: feature_name=cg26016985  | feature_id[4407].value ><br>threshold=0.6493876278400421  |
| node_16: feature_name=cg23157618  | feature_id[5511].value ><br>threshold=0.5759606957435608  |
| node_20: feature_name=cg10480329  | feature_id[1439].value ><br>threshold=0.5518321692943573  |



|                                   |                                                           |
|-----------------------------------|-----------------------------------------------------------|
| node_48: feature_name=cg17843418  | feature_id[4868].value ><br>threshold=0.34969255328178406 |
| node_52: feature_name=cg24407065  | feature_id[4522].value ><br>threshold=0.5364363789558411  |
| node_56: feature_name=cg07281938  | feature_id[249].value ><br>threshold=0.7506992518901825   |
| node_78: feature_name=cg21759907  | feature_id[1650].value ><br>threshold=0.46823520958423615 |
| node_98: feature_name=cg10886334  | feature_id[3975].value ><br>threshold=0.43698127567768097 |
| node_102: feature_name=cg09373983 | feature_id[5025].value ><br>threshold=0.5575815737247467  |
| node_106: feature_name=cg12948116 | feature_id[5360].value <=<br>threshold=0.5658791363239288 |
| node_107: feature_name=cg21906519 | feature_id[5251].value ><br>threshold=0.6089984774589539  |
| node_111: feature_name=cg17537493 | feature_id[4217].value ><br>threshold=0.5825372636318207  |
| node_117: feature_name=cg15720017 | feature_id[4443].value ><br>threshold=0.7009969055652618  |
| node_119: feature_name=cg06038180 | feature_id[3480].value ><br>threshold=0.4583848565816879  |
| node_121: feature_name=cg08619651 | feature_id[4882].value <=<br>threshold=0.2105495035648346 |
| node_122: feature_name=cg01014262 | feature_id[1911].value <=<br>threshold=0.5327437818050385 |
| node_123: feature_name=cg16863382 | feature_id[2922].value ><br>threshold=0.7200668156147003  |
| node_133: feature_name=cg06989443 | feature_id[2327].value <=<br>threshold=0.6579365730285645 |
| node_134: feature_name=cg07344990 | feature_id[2398].value ><br>threshold=0.5562876164913177  |
| node_138: feature_name=cg02966841 | feature_id[2199].value <=<br>threshold=0.7744501233100891 |
| node_139: feature_name=cg06989253 | feature_id[194].value ><br>threshold=0.7899391353130341   |
| node_171: feature_name=cg07041720 | feature_id[932].value <=<br>threshold=0.5004830807447433  |
| node_172: feature_name=cg04716580 | feature_id[1390].value <=<br>threshold=0.8913259208202362 |
| node_173: feature_name=cg12183501 | feature_id[1208].value <=<br>threshold=0.1898196041584015 |
| Class: angiosarcoma (AS)          |                                                           |

|                                   |                                                           |
|-----------------------------------|-----------------------------------------------------------|
| Rules_155                         | passed counts:1                                           |
| node_0: feature_name=cg11915444   | feature_id[2002].value ><br>threshold=0.3402601182460785  |
| node_10: feature_name=cg26016985  | feature_id[4407].value ><br>threshold=0.6493876278400421  |
| node_16: feature_name=cg23157618  | feature_id[5511].value ><br>threshold=0.5759606957435608  |
| node_20: feature_name=cg10480329  | feature_id[1439].value ><br>threshold=0.5518321692943573  |
| node_48: feature_name=cg17843418  | feature_id[4868].value ><br>threshold=0.34969255328178406 |
| node_52: feature_name=cg24407065  | feature_id[4522].value ><br>threshold=0.5364363789558411  |
| node_56: feature_name=cg07281938  | feature_id[249].value ><br>threshold=0.7506992518901825   |
| node_78: feature_name=cg21759907  | feature_id[1650].value ><br>threshold=0.46823520958423615 |
| node_98: feature_name=cg10886334  | feature_id[3975].value ><br>threshold=0.43698127567768097 |
| node_102: feature_name=cg09373983 | feature_id[5025].value ><br>threshold=0.5575815737247467  |
| node_106: feature_name=cg12948116 | feature_id[5360].value <=<br>threshold=0.5658791363239288 |
| node_107: feature_name=cg21906519 | feature_id[5251].value ><br>threshold=0.6089984774589539  |
| node_111: feature_name=cg17537493 | feature_id[4217].value ><br>threshold=0.5825372636318207  |
| node_117: feature_name=cg15720017 | feature_id[4443].value ><br>threshold=0.7009969055652618  |
| node_119: feature_name=cg06038180 | feature_id[3480].value ><br>threshold=0.4583848565816879  |
| node_121: feature_name=cg08619651 | feature_id[4882].value <=<br>threshold=0.2105495035648346 |
| node_122: feature_name=cg01014262 | feature_id[1911].value <=<br>threshold=0.5327437818050385 |
| node_123: feature_name=cg16863382 | feature_id[2922].value ><br>threshold=0.7200668156147003  |
| node_133: feature_name=cg06989443 | feature_id[2327].value <=<br>threshold=0.6579365730285645 |
| node_134: feature_name=cg07344990 | feature_id[2398].value ><br>threshold=0.5562876164913177  |

|                                                |                                                            |
|------------------------------------------------|------------------------------------------------------------|
| node_138: feature_name=cg02966841              | feature_id[2199].value <=<br>threshold=0.7744501233100891  |
| node_139: feature_name=cg06989253              | feature_id[194].value <=<br>threshold=0.7899391353130341   |
| node_140: feature_name=cg24617568              | feature_id[3282].value <=<br>threshold=0.26932457089424133 |
| node_141: feature_name=cg12614090              | feature_id[2765].value <=<br>threshold=0.1813211366534233  |
| node_142: feature_name=cg10917602              | feature_id[4685].value <=<br>threshold=0.5744736790657043  |
| node_143: feature_name=cg23723410              | feature_id[34].value <=<br>threshold=0.3201078921556473    |
| node_144: feature_name=cg26804423              | feature_id[1725].value ><br>threshold=0.39587317407131195  |
| node_146: feature_name=cg20080282              | feature_id[1150].value <=<br>threshold=0.856019914150238   |
| node_147: feature_name=cg08924374              | feature_id[4125].value ><br>threshold=0.07863279432058334  |
| node_149: feature_name=cg08535779              | feature_id[2187].value ><br>threshold=0.24677357077598572  |
| node_151: feature_name=cg00290626              | feature_id[4663].value ><br>threshold=0.6112961769104004   |
| node_153: feature_name=cg20829550              | feature_id[1054].value ><br>threshold=0.15552543848752975  |
| node_155: feature_name=cg25841625              | feature_id[555].value ><br>threshold=0.20218250900506973   |
| node_157: feature_name=cg11724511              | feature_id[1465].value ><br>threshold=0.548207238316536    |
| node_159: feature_name=cg12549211              | feature_id[3192].value ><br>threshold=0.6682310700416565   |
| node_161: feature_name=cg25431366              | feature_id[136].value ><br>threshold=0.5233770608901978    |
| node_163: feature_name=cg23344121              | feature_id[799].value ><br>threshold=0.7573113739490509    |
| Class: epithelioid haemangioendothelioma (EHE) |                                                            |
|                                                |                                                            |
| Rules_156                                      | passed counts:1                                            |
| node_0: feature_name=cg11915444                | feature_id[2002].value ><br>threshold=0.3402601182460785   |
| node_10: feature_name=cg26016985               | feature_id[4407].value ><br>threshold=0.6493876278400421   |
| node_16: feature_name=cg23157618               | feature_id[5511].value ><br>threshold=0.5759606957435608   |

|                                   |                                                            |
|-----------------------------------|------------------------------------------------------------|
| node_20: feature_name=cg10480329  | feature_id[1439].value ><br>threshold=0.5518321692943573   |
| node_48: feature_name=cg17843418  | feature_id[4868].value ><br>threshold=0.34969255328178406  |
| node_52: feature_name=cg24407065  | feature_id[4522].value ><br>threshold=0.5364363789558411   |
| node_56: feature_name=cg07281938  | feature_id[249].value ><br>threshold=0.7506992518901825    |
| node_78: feature_name=cg21759907  | feature_id[1650].value ><br>threshold=0.46823520958423615  |
| node_98: feature_name=cg10886334  | feature_id[3975].value ><br>threshold=0.43698127567768097  |
| node_102: feature_name=cg09373983 | feature_id[5025].value ><br>threshold=0.5575815737247467   |
| node_106: feature_name=cg12948116 | feature_id[5360].value <=<br>threshold=0.5658791363239288  |
| node_107: feature_name=cg21906519 | feature_id[5251].value ><br>threshold=0.6089984774589539   |
| node_111: feature_name=cg17537493 | feature_id[4217].value ><br>threshold=0.5825372636318207   |
| node_117: feature_name=cg15720017 | feature_id[4443].value ><br>threshold=0.7009969055652618   |
| node_119: feature_name=cg06038180 | feature_id[3480].value ><br>threshold=0.4583848565816879   |
| node_121: feature_name=cg08619651 | feature_id[4882].value <=<br>threshold=0.2105495035648346  |
| node_122: feature_name=cg01014262 | feature_id[1911].value <=<br>threshold=0.5327437818050385  |
| node_123: feature_name=cg16863382 | feature_id[2922].value ><br>threshold=0.7200668156147003   |
| node_133: feature_name=cg06989443 | feature_id[2327].value <=<br>threshold=0.6579365730285645  |
| node_134: feature_name=cg07344990 | feature_id[2398].value ><br>threshold=0.5562876164913177   |
| node_138: feature_name=cg02966841 | feature_id[2199].value <=<br>threshold=0.7744501233100891  |
| node_139: feature_name=cg06989253 | feature_id[194].value <=<br>threshold=0.7899391353130341   |
| node_140: feature_name=cg24617568 | feature_id[3282].value <=<br>threshold=0.26932457089424133 |
| node_141: feature_name=cg12614090 | feature_id[2765].value <=<br>threshold=0.1813211366534233  |
| node_142: feature_name=cg10917602 | feature_id[4685].value <=<br>threshold=0.5744736790657043  |

|                                                                         |                                                           |
|-------------------------------------------------------------------------|-----------------------------------------------------------|
| node_143: feature_name=cg23723410                                       | feature_id[34].value <=<br>threshold=0.3201078921556473   |
| node_144: feature_name=cg26804423                                       | feature_id[1725].value ><br>threshold=0.39587317407131195 |
| node_146: feature_name=cg20080282                                       | feature_id[1150].value <=<br>threshold=0.856019914150238  |
| node_147: feature_name=cg08924374                                       | feature_id[4125].value ><br>threshold=0.07863279432058334 |
| node_149: feature_name=cg08535779                                       | feature_id[2187].value ><br>threshold=0.24677357077598572 |
| node_151: feature_name=cg00290626                                       | feature_id[4663].value ><br>threshold=0.6112961769104004  |
| node_153: feature_name=cg20829550                                       | feature_id[1054].value ><br>threshold=0.15552543848752975 |
| node_155: feature_name=cg25841625                                       | feature_id[555].value ><br>threshold=0.20218250900506973  |
| node_157: feature_name=cg11724511                                       | feature_id[1465].value ><br>threshold=0.548207238316536   |
| node_159: feature_name=cg12549211                                       | feature_id[3192].value ><br>threshold=0.6682310700416565  |
| node_161: feature_name=cg25431366                                       | feature_id[136].value ><br>threshold=0.5233770608901978   |
| node_163: feature_name=cg23344121                                       | feature_id[799].value <=<br>threshold=0.7573113739490509  |
| Class: atypical fibroxanthoma<br>(AFX)/pleomorphic dermal sarcoma (PDS) |                                                           |
|                                                                         |                                                           |
| Rules_157                                                               | passed counts:1                                           |
| node_0: feature_name=cg11915444                                         | feature_id[2002].value ><br>threshold=0.3402601182460785  |
| node_10: feature_name=cg26016985                                        | feature_id[4407].value ><br>threshold=0.6493876278400421  |
| node_16: feature_name=cg23157618                                        | feature_id[5511].value ><br>threshold=0.5759606957435608  |
| node_20: feature_name=cg10480329                                        | feature_id[1439].value ><br>threshold=0.5518321692943573  |
| node_48: feature_name=cg17843418                                        | feature_id[4868].value ><br>threshold=0.34969255328178406 |
| node_52: feature_name=cg24407065                                        | feature_id[4522].value ><br>threshold=0.5364363789558411  |
| node_56: feature_name=cg07281938                                        | feature_id[249].value ><br>threshold=0.7506992518901825   |

|                                   |                                                            |
|-----------------------------------|------------------------------------------------------------|
| node_78: feature_name=cg21759907  | feature_id[1650].value ><br>threshold=0.46823520958423615  |
| node_98: feature_name=cg10886334  | feature_id[3975].value ><br>threshold=0.43698127567768097  |
| node_102: feature_name=cg09373983 | feature_id[5025].value ><br>threshold=0.5575815737247467   |
| node_106: feature_name=cg12948116 | feature_id[5360].value <=<br>threshold=0.5658791363239288  |
| node_107: feature_name=cg21906519 | feature_id[5251].value ><br>threshold=0.6089984774589539   |
| node_111: feature_name=cg17537493 | feature_id[4217].value ><br>threshold=0.5825372636318207   |
| node_117: feature_name=cg15720017 | feature_id[4443].value ><br>threshold=0.7009969055652618   |
| node_119: feature_name=cg06038180 | feature_id[3480].value ><br>threshold=0.4583848565816879   |
| node_121: feature_name=cg08619651 | feature_id[4882].value <=<br>threshold=0.2105495035648346  |
| node_122: feature_name=cg01014262 | feature_id[1911].value <=<br>threshold=0.5327437818050385  |
| node_123: feature_name=cg16863382 | feature_id[2922].value ><br>threshold=0.7200668156147003   |
| node_133: feature_name=cg06989443 | feature_id[2327].value <=<br>threshold=0.6579365730285645  |
| node_134: feature_name=cg07344990 | feature_id[2398].value ><br>threshold=0.5562876164913177   |
| node_138: feature_name=cg02966841 | feature_id[2199].value <=<br>threshold=0.7744501233100891  |
| node_139: feature_name=cg06989253 | feature_id[194].value <=<br>threshold=0.7899391353130341   |
| node_140: feature_name=cg24617568 | feature_id[3282].value <=<br>threshold=0.26932457089424133 |
| node_141: feature_name=cg12614090 | feature_id[2765].value <=<br>threshold=0.1813211366534233  |
| node_142: feature_name=cg10917602 | feature_id[4685].value <=<br>threshold=0.5744736790657043  |
| node_143: feature_name=cg23723410 | feature_id[34].value <=<br>threshold=0.3201078921556473    |
| node_144: feature_name=cg26804423 | feature_id[1725].value ><br>threshold=0.39587317407131195  |
| node_146: feature_name=cg20080282 | feature_id[1150].value <=<br>threshold=0.856019914150238   |
| node_147: feature_name=cg08924374 | feature_id[4125].value ><br>threshold=0.07863279432058334  |

|                                          |                                                           |
|------------------------------------------|-----------------------------------------------------------|
| node_149: feature_name=cg08535779        | feature_id[2187].value ><br>threshold=0.24677357077598572 |
| node_151: feature_name=cg00290626        | feature_id[4663].value ><br>threshold=0.6112961769104004  |
| node_153: feature_name=cg20829550        | feature_id[1054].value ><br>threshold=0.15552543848752975 |
| node_155: feature_name=cg25841625        | feature_id[555].value ><br>threshold=0.20218250900506973  |
| node_157: feature_name=cg11724511        | feature_id[1465].value ><br>threshold=0.548207238316536   |
| node_159: feature_name=cg12549211        | feature_id[3192].value ><br>threshold=0.6682310700416565  |
| node_161: feature_name=cg25431366        | feature_id[136].value <=<br>threshold=0.5233770608901978  |
| Class: alveolar soft part sarcoma (ASPS) |                                                           |
| Rules_158                                | passed counts:1                                           |
| node_0: feature_name=cg11915444          | feature_id[2002].value ><br>threshold=0.3402601182460785  |
| node_10: feature_name=cg26016985         | feature_id[4407].value ><br>threshold=0.6493876278400421  |
| node_16: feature_name=cg23157618         | feature_id[5511].value ><br>threshold=0.5759606957435608  |
| node_20: feature_name=cg10480329         | feature_id[1439].value ><br>threshold=0.5518321692943573  |
| node_48: feature_name=cg17843418         | feature_id[4868].value ><br>threshold=0.34969255328178406 |
| node_52: feature_name=cg24407065         | feature_id[4522].value ><br>threshold=0.5364363789558411  |
| node_56: feature_name=cg07281938         | feature_id[249].value ><br>threshold=0.7506992518901825   |
| node_78: feature_name=cg21759907         | feature_id[1650].value ><br>threshold=0.46823520958423615 |
| node_98: feature_name=cg10886334         | feature_id[3975].value ><br>threshold=0.43698127567768097 |
| node_102: feature_name=cg09373983        | feature_id[5025].value ><br>threshold=0.5575815737247467  |
| node_106: feature_name=cg12948116        | feature_id[5360].value <=<br>threshold=0.5658791363239288 |
| node_107: feature_name=cg21906519        | feature_id[5251].value ><br>threshold=0.6089984774589539  |
| node_111: feature_name=cg17537493        | feature_id[4217].value ><br>threshold=0.5825372636318207  |

|                                   |                                                            |
|-----------------------------------|------------------------------------------------------------|
| node_117: feature_name=cg15720017 | feature_id[4443].value ><br>threshold=0.7009969055652618   |
| node_119: feature_name=cg06038180 | feature_id[3480].value ><br>threshold=0.4583848565816879   |
| node_121: feature_name=cg08619651 | feature_id[4882].value <=<br>threshold=0.2105495035648346  |
| node_122: feature_name=cg01014262 | feature_id[1911].value <=<br>threshold=0.5327437818050385  |
| node_123: feature_name=cg16863382 | feature_id[2922].value ><br>threshold=0.7200668156147003   |
| node_133: feature_name=cg06989443 | feature_id[2327].value <=<br>threshold=0.6579365730285645  |
| node_134: feature_name=cg07344990 | feature_id[2398].value ><br>threshold=0.5562876164913177   |
| node_138: feature_name=cg02966841 | feature_id[2199].value <=<br>threshold=0.7744501233100891  |
| node_139: feature_name=cg06989253 | feature_id[194].value <=<br>threshold=0.7899391353130341   |
| node_140: feature_name=cg24617568 | feature_id[3282].value <=<br>threshold=0.26932457089424133 |
| node_141: feature_name=cg12614090 | feature_id[2765].value <=<br>threshold=0.1813211366534233  |
| node_142: feature_name=cg10917602 | feature_id[4685].value <=<br>threshold=0.5744736790657043  |
| node_143: feature_name=cg23723410 | feature_id[34].value <=<br>threshold=0.3201078921556473    |
| node_144: feature_name=cg26804423 | feature_id[1725].value ><br>threshold=0.39587317407131195  |
| node_146: feature_name=cg20080282 | feature_id[1150].value <=<br>threshold=0.856019914150238   |
| node_147: feature_name=cg08924374 | feature_id[4125].value ><br>threshold=0.07863279432058334  |
| node_149: feature_name=cg08535779 | feature_id[2187].value ><br>threshold=0.24677357077598572  |
| node_151: feature_name=cg00290626 | feature_id[4663].value ><br>threshold=0.6112961769104004   |
| node_153: feature_name=cg20829550 | feature_id[1054].value ><br>threshold=0.15552543848752975  |
| node_155: feature_name=cg25841625 | feature_id[555].value ><br>threshold=0.20218250900506973   |
| node_157: feature_name=cg11724511 | feature_id[1465].value ><br>threshold=0.548207238316536    |
| node_159: feature_name=cg12549211 | feature_id[3192].value <=<br>threshold=0.6682310700416565  |



|                                   |                                                           |
|-----------------------------------|-----------------------------------------------------------|
| Class: fibrous dysplasia (FDY)    |                                                           |
| Rules_159                         | passed counts:1                                           |
| node_0: feature_name=cg11915444   | feature_id[2002].value ><br>threshold=0.3402601182460785  |
| node_10: feature_name=cg26016985  | feature_id[4407].value ><br>threshold=0.6493876278400421  |
| node_16: feature_name=cg23157618  | feature_id[5511].value ><br>threshold=0.5759606957435608  |
| node_20: feature_name=cg10480329  | feature_id[1439].value ><br>threshold=0.5518321692943573  |
| node_48: feature_name=cg17843418  | feature_id[4868].value ><br>threshold=0.34969255328178406 |
| node_52: feature_name=cg24407065  | feature_id[4522].value ><br>threshold=0.5364363789558411  |
| node_56: feature_name=cg07281938  | feature_id[249].value ><br>threshold=0.7506992518901825   |
| node_78: feature_name=cg21759907  | feature_id[1650].value ><br>threshold=0.46823520958423615 |
| node_98: feature_name=cg10886334  | feature_id[3975].value ><br>threshold=0.43698127567768097 |
| node_102: feature_name=cg09373983 | feature_id[5025].value ><br>threshold=0.5575815737247467  |
| node_106: feature_name=cg12948116 | feature_id[5360].value <=<br>threshold=0.5658791363239288 |
| node_107: feature_name=cg21906519 | feature_id[5251].value ><br>threshold=0.6089984774589539  |
| node_111: feature_name=cg17537493 | feature_id[4217].value ><br>threshold=0.5825372636318207  |
| node_117: feature_name=cg15720017 | feature_id[4443].value ><br>threshold=0.7009969055652618  |
| node_119: feature_name=cg06038180 | feature_id[3480].value ><br>threshold=0.4583848565816879  |
| node_121: feature_name=cg08619651 | feature_id[4882].value <=<br>threshold=0.2105495035648346 |
| node_122: feature_name=cg01014262 | feature_id[1911].value <=<br>threshold=0.5327437818050385 |
| node_123: feature_name=cg16863382 | feature_id[2922].value ><br>threshold=0.7200668156147003  |
| node_133: feature_name=cg06989443 | feature_id[2327].value <=<br>threshold=0.6579365730285645 |
| node_134: feature_name=cg07344990 | feature_id[2398].value ><br>threshold=0.5562876164913177  |

|                                                         |                                                            |
|---------------------------------------------------------|------------------------------------------------------------|
| node_138: feature_name=cg02966841                       | feature_id[2199].value <=<br>threshold=0.7744501233100891  |
| node_139: feature_name=cg06989253                       | feature_id[194].value <=<br>threshold=0.7899391353130341   |
| node_140: feature_name=cg24617568                       | feature_id[3282].value <=<br>threshold=0.26932457089424133 |
| node_141: feature_name=cg12614090                       | feature_id[2765].value <=<br>threshold=0.1813211366534233  |
| node_142: feature_name=cg10917602                       | feature_id[4685].value <=<br>threshold=0.5744736790657043  |
| node_143: feature_name=cg23723410                       | feature_id[34].value <=<br>threshold=0.3201078921556473    |
| node_144: feature_name=cg26804423                       | feature_id[1725].value ><br>threshold=0.39587317407131195  |
| node_146: feature_name=cg20080282                       | feature_id[1150].value <=<br>threshold=0.856019914150238   |
| node_147: feature_name=cg08924374                       | feature_id[4125].value ><br>threshold=0.07863279432058334  |
| node_149: feature_name=cg08535779                       | feature_id[2187].value ><br>threshold=0.24677357077598572  |
| node_151: feature_name=cg00290626                       | feature_id[4663].value ><br>threshold=0.6112961769104004   |
| node_153: feature_name=cg20829550                       | feature_id[1054].value ><br>threshold=0.15552543848752975  |
| node_155: feature_name=cg25841625                       | feature_id[555].value ><br>threshold=0.20218250900506973   |
| node_157: feature_name=cg11724511                       | feature_id[1465].value <=<br>threshold=0.548207238316536   |
| Class: malignant peripheral nerve sheath tumour (MPNST) |                                                            |
|                                                         |                                                            |
| Rules_160                                               | passed counts:1                                            |
| node_0: feature_name=cg11915444                         | feature_id[2002].value ><br>threshold=0.3402601182460785   |
| node_10: feature_name=cg26016985                        | feature_id[4407].value ><br>threshold=0.6493876278400421   |
| node_16: feature_name=cg23157618                        | feature_id[5511].value ><br>threshold=0.5759606957435608   |
| node_20: feature_name=cg10480329                        | feature_id[1439].value ><br>threshold=0.5518321692943573   |
| node_48: feature_name=cg17843418                        | feature_id[4868].value ><br>threshold=0.34969255328178406  |

|                                   |                                                            |
|-----------------------------------|------------------------------------------------------------|
| node_52: feature_name=cg24407065  | feature_id[4522].value ><br>threshold=0.5364363789558411   |
| node_56: feature_name=cg07281938  | feature_id[249].value ><br>threshold=0.7506992518901825    |
| node_78: feature_name=cg21759907  | feature_id[1650].value ><br>threshold=0.46823520958423615  |
| node_98: feature_name=cg10886334  | feature_id[3975].value ><br>threshold=0.43698127567768097  |
| node_102: feature_name=cg09373983 | feature_id[5025].value ><br>threshold=0.5575815737247467   |
| node_106: feature_name=cg12948116 | feature_id[5360].value <=<br>threshold=0.5658791363239288  |
| node_107: feature_name=cg21906519 | feature_id[5251].value ><br>threshold=0.6089984774589539   |
| node_111: feature_name=cg17537493 | feature_id[4217].value ><br>threshold=0.5825372636318207   |
| node_117: feature_name=cg15720017 | feature_id[4443].value ><br>threshold=0.7009969055652618   |
| node_119: feature_name=cg06038180 | feature_id[3480].value ><br>threshold=0.4583848565816879   |
| node_121: feature_name=cg08619651 | feature_id[4882].value <=<br>threshold=0.2105495035648346  |
| node_122: feature_name=cg01014262 | feature_id[1911].value <=<br>threshold=0.5327437818050385  |
| node_123: feature_name=cg16863382 | feature_id[2922].value ><br>threshold=0.7200668156147003   |
| node_133: feature_name=cg06989443 | feature_id[2327].value <=<br>threshold=0.6579365730285645  |
| node_134: feature_name=cg07344990 | feature_id[2398].value ><br>threshold=0.5562876164913177   |
| node_138: feature_name=cg02966841 | feature_id[2199].value <=<br>threshold=0.7744501233100891  |
| node_139: feature_name=cg06989253 | feature_id[194].value <=<br>threshold=0.7899391353130341   |
| node_140: feature_name=cg24617568 | feature_id[3282].value <=<br>threshold=0.26932457089424133 |
| node_141: feature_name=cg12614090 | feature_id[2765].value <=<br>threshold=0.1813211366534233  |
| node_142: feature_name=cg10917602 | feature_id[4685].value <=<br>threshold=0.5744736790657043  |
| node_143: feature_name=cg23723410 | feature_id[34].value <=<br>threshold=0.3201078921556473    |
| node_144: feature_name=cg26804423 | feature_id[1725].value ><br>threshold=0.39587317407131195  |

|                                            |                                                           |
|--------------------------------------------|-----------------------------------------------------------|
| node_146: feature_name=cg20080282          | feature_id[1150].value <=<br>threshold=0.856019914150238  |
| node_147: feature_name=cg08924374          | feature_id[4125].value ><br>threshold=0.07863279432058334 |
| node_149: feature_name=cg08535779          | feature_id[2187].value ><br>threshold=0.24677357077598572 |
| node_151: feature_name=cg00290626          | feature_id[4663].value ><br>threshold=0.6112961769104004  |
| node_153: feature_name=cg20829550          | feature_id[1054].value ><br>threshold=0.15552543848752975 |
| node_155: feature_name=cg25841625          | feature_id[555].value <=<br>threshold=0.20218250900506973 |
| Class: ossifying fibromyxoid tumour (OFMT) |                                                           |
|                                            |                                                           |
| Rules_161                                  | passed counts:1                                           |
| node_0: feature_name=cg11915444            | feature_id[2002].value ><br>threshold=0.3402601182460785  |
| node_10: feature_name=cg26016985           | feature_id[4407].value ><br>threshold=0.6493876278400421  |
| node_16: feature_name=cg23157618           | feature_id[5511].value ><br>threshold=0.5759606957435608  |
| node_20: feature_name=cg10480329           | feature_id[1439].value ><br>threshold=0.5518321692943573  |
| node_48: feature_name=cg17843418           | feature_id[4868].value ><br>threshold=0.34969255328178406 |
| node_52: feature_name=cg24407065           | feature_id[4522].value ><br>threshold=0.5364363789558411  |
| node_56: feature_name=cg07281938           | feature_id[249].value ><br>threshold=0.7506992518901825   |
| node_78: feature_name=cg21759907           | feature_id[1650].value ><br>threshold=0.46823520958423615 |
| node_98: feature_name=cg10886334           | feature_id[3975].value ><br>threshold=0.43698127567768097 |
| node_102: feature_name=cg09373983          | feature_id[5025].value ><br>threshold=0.5575815737247467  |
| node_106: feature_name=cg12948116          | feature_id[5360].value <=<br>threshold=0.5658791363239288 |
| node_107: feature_name=cg21906519          | feature_id[5251].value ><br>threshold=0.6089984774589539  |
| node_111: feature_name=cg17537493          | feature_id[4217].value ><br>threshold=0.5825372636318207  |
| node_117: feature_name=cg15720017          | feature_id[4443].value ><br>threshold=0.7009969055652618  |

|                                                   |                                                            |
|---------------------------------------------------|------------------------------------------------------------|
| node_119: feature_name=cg06038180                 | feature_id[3480].value ><br>threshold=0.4583848565816879   |
| node_121: feature_name=cg08619651                 | feature_id[4882].value <=<br>threshold=0.2105495035648346  |
| node_122: feature_name=cg01014262                 | feature_id[1911].value <=<br>threshold=0.5327437818050385  |
| node_123: feature_name=cg16863382                 | feature_id[2922].value ><br>threshold=0.7200668156147003   |
| node_133: feature_name=cg06989443                 | feature_id[2327].value <=<br>threshold=0.6579365730285645  |
| node_134: feature_name=cg07344990                 | feature_id[2398].value ><br>threshold=0.5562876164913177   |
| node_138: feature_name=cg02966841                 | feature_id[2199].value <=<br>threshold=0.7744501233100891  |
| node_139: feature_name=cg06989253                 | feature_id[194].value <=<br>threshold=0.7899391353130341   |
| node_140: feature_name=cg24617568                 | feature_id[3282].value <=<br>threshold=0.26932457089424133 |
| node_141: feature_name=cg12614090                 | feature_id[2765].value <=<br>threshold=0.1813211366534233  |
| node_142: feature_name=cg10917602                 | feature_id[4685].value <=<br>threshold=0.5744736790657043  |
| node_143: feature_name=cg23723410                 | feature_id[34].value <=<br>threshold=0.3201078921556473    |
| node_144: feature_name=cg26804423                 | feature_id[1725].value ><br>threshold=0.39587317407131195  |
| node_146: feature_name=cg20080282                 | feature_id[1150].value <=<br>threshold=0.856019914150238   |
| node_147: feature_name=cg08924374                 | feature_id[4125].value ><br>threshold=0.07863279432058334  |
| node_149: feature_name=cg08535779                 | feature_id[2187].value ><br>threshold=0.24677357077598572  |
| node_151: feature_name=cg00290626                 | feature_id[4663].value ><br>threshold=0.6112961769104004   |
| node_153: feature_name=cg20829550                 | feature_id[1054].value <=<br>threshold=0.15552543848752975 |
| Class: extraskeletal myxoid chondrosarcoma (EMCS) |                                                            |
|                                                   |                                                            |
| Rules_162                                         | passed counts:1                                            |
| node_0: feature_name=cg11915444                   | feature_id[2002].value ><br>threshold=0.3402601182460785   |

|                                   |                                                            |
|-----------------------------------|------------------------------------------------------------|
| node_10: feature_name=cg26016985  | feature_id[4407].value ><br>threshold=0.6493876278400421   |
| node_16: feature_name=cg23157618  | feature_id[5511].value ><br>threshold=0.5759606957435608   |
| node_20: feature_name=cg10480329  | feature_id[1439].value ><br>threshold=0.5518321692943573   |
| node_48: feature_name=cg17843418  | feature_id[4868].value ><br>threshold=0.34969255328178406  |
| node_52: feature_name=cg24407065  | feature_id[4522].value ><br>threshold=0.5364363789558411   |
| node_56: feature_name=cg07281938  | feature_id[249].value ><br>threshold=0.7506992518901825    |
| node_78: feature_name=cg21759907  | feature_id[1650].value ><br>threshold=0.46823520958423615  |
| node_98: feature_name=cg10886334  | feature_id[3975].value ><br>threshold=0.43698127567768097  |
| node_102: feature_name=cg09373983 | feature_id[5025].value ><br>threshold=0.5575815737247467   |
| node_106: feature_name=cg12948116 | feature_id[5360].value <=<br>threshold=0.5658791363239288  |
| node_107: feature_name=cg21906519 | feature_id[5251].value ><br>threshold=0.6089984774589539   |
| node_111: feature_name=cg17537493 | feature_id[4217].value ><br>threshold=0.5825372636318207   |
| node_117: feature_name=cg15720017 | feature_id[4443].value ><br>threshold=0.7009969055652618   |
| node_119: feature_name=cg06038180 | feature_id[3480].value ><br>threshold=0.4583848565816879   |
| node_121: feature_name=cg08619651 | feature_id[4882].value <=<br>threshold=0.2105495035648346  |
| node_122: feature_name=cg01014262 | feature_id[1911].value <=<br>threshold=0.5327437818050385  |
| node_123: feature_name=cg16863382 | feature_id[2922].value ><br>threshold=0.7200668156147003   |
| node_133: feature_name=cg06989443 | feature_id[2327].value <=<br>threshold=0.6579365730285645  |
| node_134: feature_name=cg07344990 | feature_id[2398].value ><br>threshold=0.5562876164913177   |
| node_138: feature_name=cg02966841 | feature_id[2199].value <=<br>threshold=0.7744501233100891  |
| node_139: feature_name=cg06989253 | feature_id[194].value <=<br>threshold=0.7899391353130341   |
| node_140: feature_name=cg24617568 | feature_id[3282].value <=<br>threshold=0.26932457089424133 |

|                                   |                                                           |
|-----------------------------------|-----------------------------------------------------------|
| node_141: feature_name=cg12614090 | feature_id[2765].value <=<br>threshold=0.1813211366534233 |
| node_142: feature_name=cg10917602 | feature_id[4685].value <=<br>threshold=0.5744736790657043 |
| node_143: feature_name=cg23723410 | feature_id[34].value <=<br>threshold=0.3201078921556473   |
| node_144: feature_name=cg26804423 | feature_id[1725].value ><br>threshold=0.39587317407131195 |
| node_146: feature_name=cg20080282 | feature_id[1150].value <=<br>threshold=0.856019914150238  |
| node_147: feature_name=cg08924374 | feature_id[4125].value ><br>threshold=0.07863279432058334 |
| node_149: feature_name=cg08535779 | feature_id[2187].value ><br>threshold=0.24677357077598572 |
| node_151: feature_name=cg00290626 | feature_id[4663].value <=<br>threshold=0.6112961769104004 |
| Class: epithelioid sarcoma (ES)   |                                                           |
| Rules_163                         | passed counts:1                                           |
| node_0: feature_name=cg11915444   | feature_id[2002].value ><br>threshold=0.3402601182460785  |
| node_10: feature_name=cg26016985  | feature_id[4407].value ><br>threshold=0.6493876278400421  |
| node_16: feature_name=cg23157618  | feature_id[5511].value ><br>threshold=0.5759606957435608  |
| node_20: feature_name=cg10480329  | feature_id[1439].value ><br>threshold=0.5518321692943573  |
| node_48: feature_name=cg17843418  | feature_id[4868].value ><br>threshold=0.34969255328178406 |
| node_52: feature_name=cg24407065  | feature_id[4522].value ><br>threshold=0.5364363789558411  |
| node_56: feature_name=cg07281938  | feature_id[249].value ><br>threshold=0.7506992518901825   |
| node_78: feature_name=cg21759907  | feature_id[1650].value ><br>threshold=0.46823520958423615 |
| node_98: feature_name=cg10886334  | feature_id[3975].value ><br>threshold=0.43698127567768097 |
| node_102: feature_name=cg09373983 | feature_id[5025].value ><br>threshold=0.5575815737247467  |
| node_106: feature_name=cg12948116 | feature_id[5360].value <=<br>threshold=0.5658791363239288 |
| node_107: feature_name=cg21906519 | feature_id[5251].value ><br>threshold=0.6089984774589539  |

|                                   |                                                            |
|-----------------------------------|------------------------------------------------------------|
| node_111: feature_name=cg17537493 | feature_id[4217].value ><br>threshold=0.5825372636318207   |
| node_117: feature_name=cg15720017 | feature_id[4443].value ><br>threshold=0.7009969055652618   |
| node_119: feature_name=cg06038180 | feature_id[3480].value ><br>threshold=0.4583848565816879   |
| node_121: feature_name=cg08619651 | feature_id[4882].value <=<br>threshold=0.2105495035648346  |
| node_122: feature_name=cg01014262 | feature_id[1911].value <=<br>threshold=0.5327437818050385  |
| node_123: feature_name=cg16863382 | feature_id[2922].value ><br>threshold=0.7200668156147003   |
| node_133: feature_name=cg06989443 | feature_id[2327].value <=<br>threshold=0.6579365730285645  |
| node_134: feature_name=cg07344990 | feature_id[2398].value ><br>threshold=0.5562876164913177   |
| node_138: feature_name=cg02966841 | feature_id[2199].value <=<br>threshold=0.7744501233100891  |
| node_139: feature_name=cg06989253 | feature_id[194].value <=<br>threshold=0.7899391353130341   |
| node_140: feature_name=cg24617568 | feature_id[3282].value <=<br>threshold=0.26932457089424133 |
| node_141: feature_name=cg12614090 | feature_id[2765].value <=<br>threshold=0.1813211366534233  |
| node_142: feature_name=cg10917602 | feature_id[4685].value <=<br>threshold=0.5744736790657043  |
| node_143: feature_name=cg23723410 | feature_id[34].value <=<br>threshold=0.3201078921556473    |
| node_144: feature_name=cg26804423 | feature_id[1725].value ><br>threshold=0.39587317407131195  |
| node_146: feature_name=cg20080282 | feature_id[1150].value <=<br>threshold=0.856019914150238   |
| node_147: feature_name=cg08924374 | feature_id[4125].value ><br>threshold=0.07863279432058334  |
| node_149: feature_name=cg08535779 | feature_id[2187].value <=<br>threshold=0.24677357077598572 |
| Class: osteoblastoma (OB)         |                                                            |
|                                   |                                                            |
| Rules_164                         | passed counts:1                                            |
| node_0: feature_name=cg11915444   | feature_id[2002].value ><br>threshold=0.3402601182460785   |
| node_10: feature_name=cg26016985  | feature_id[4407].value ><br>threshold=0.6493876278400421   |



|                                                     |                                                            |
|-----------------------------------------------------|------------------------------------------------------------|
| node_16: feature_name=cg23157618                    | feature_id[5511].value ><br>threshold=0.5759606957435608   |
| node_20: feature_name=cg10480329                    | feature_id[1439].value ><br>threshold=0.5518321692943573   |
| node_48: feature_name=cg17843418                    | feature_id[4868].value ><br>threshold=0.34969255328178406  |
| node_52: feature_name=cg24407065                    | feature_id[4522].value ><br>threshold=0.5364363789558411   |
| node_56: feature_name=cg07281938                    | feature_id[249].value ><br>threshold=0.7506992518901825    |
| node_78: feature_name=cg21759907                    | feature_id[1650].value ><br>threshold=0.46823520958423615  |
| node_98: feature_name=cg10886334                    | feature_id[3975].value ><br>threshold=0.43698127567768097  |
| node_102: feature_name=cg09373983                   | feature_id[5025].value ><br>threshold=0.5575815737247467   |
| node_106: feature_name=cg12948116                   | feature_id[5360].value <=<br>threshold=0.5658791363239288  |
| node_107: feature_name=cg21906519                   | feature_id[5251].value ><br>threshold=0.6089984774589539   |
| node_111: feature_name=cg17537493                   | feature_id[4217].value ><br>threshold=0.5825372636318207   |
| node_117: feature_name=cg15720017                   | feature_id[4443].value ><br>threshold=0.7009969055652618   |
| node_119: feature_name=cg06038180                   | feature_id[3480].value ><br>threshold=0.4583848565816879   |
| node_121: feature_name=cg08619651                   | feature_id[4882].value <=<br>threshold=0.2105495035648346  |
| node_122: feature_name=cg01014262                   | feature_id[1911].value <=<br>threshold=0.5327437818050385  |
| node_123: feature_name=cg16863382                   | feature_id[2922].value ><br>threshold=0.7200668156147003   |
| node_133: feature_name=cg06989443                   | feature_id[2327].value <=<br>threshold=0.6579365730285645  |
| node_134: feature_name=cg07344990                   | feature_id[2398].value <=<br>threshold=0.5562876164913177  |
| node_135: feature_name=cg01329151                   | feature_id[1681].value <=<br>threshold=0.20543088763952255 |
| Class: desmoplastic small round cell tumour (DSRCT) |                                                            |
| Rules_165                                           | passed counts:1                                            |

|                                   |                                                           |
|-----------------------------------|-----------------------------------------------------------|
| node_0: feature_name=cg11915444   | feature_id[2002].value ><br>threshold=0.3402601182460785  |
| node_10: feature_name=cg26016985  | feature_id[4407].value ><br>threshold=0.6493876278400421  |
| node_16: feature_name=cg23157618  | feature_id[5511].value ><br>threshold=0.5759606957435608  |
| node_20: feature_name=cg10480329  | feature_id[1439].value ><br>threshold=0.5518321692943573  |
| node_48: feature_name=cg17843418  | feature_id[4868].value ><br>threshold=0.34969255328178406 |
| node_52: feature_name=cg24407065  | feature_id[4522].value ><br>threshold=0.5364363789558411  |
| node_56: feature_name=cg07281938  | feature_id[249].value ><br>threshold=0.7506992518901825   |
| node_78: feature_name=cg21759907  | feature_id[1650].value ><br>threshold=0.46823520958423615 |
| node_98: feature_name=cg10886334  | feature_id[3975].value ><br>threshold=0.43698127567768097 |
| node_102: feature_name=cg09373983 | feature_id[5025].value ><br>threshold=0.5575815737247467  |
| node_106: feature_name=cg12948116 | feature_id[5360].value <=<br>threshold=0.5658791363239288 |
| node_107: feature_name=cg21906519 | feature_id[5251].value ><br>threshold=0.6089984774589539  |
| node_111: feature_name=cg17537493 | feature_id[4217].value ><br>threshold=0.5825372636318207  |
| node_117: feature_name=cg15720017 | feature_id[4443].value ><br>threshold=0.7009969055652618  |
| node_119: feature_name=cg06038180 | feature_id[3480].value ><br>threshold=0.4583848565816879  |
| node_121: feature_name=cg08619651 | feature_id[4882].value <=<br>threshold=0.2105495035648346 |
| node_122: feature_name=cg01014262 | feature_id[1911].value <=<br>threshold=0.5327437818050385 |
| node_123: feature_name=cg16863382 | feature_id[2922].value <=<br>threshold=0.7200668156147003 |
| node_124: feature_name=cg11225330 | feature_id[3185].value ><br>threshold=0.7814575433731079  |
| node_126: feature_name=cg15543534 | feature_id[423].value <=<br>threshold=0.86179119348526    |
| node_127: feature_name=cg18809729 | feature_id[5184].value <=<br>threshold=0.8457489907741547 |
| node_128: feature_name=cg20000539 | feature_id[5329].value <=<br>threshold=0.7002188265323639 |

|                                                |                                                           |
|------------------------------------------------|-----------------------------------------------------------|
| Class: rhabdomyosarcoma (RMS)                  |                                                           |
|                                                |                                                           |
| Rules_166                                      | passed counts:1                                           |
| node_0: feature_name=cg11915444                | feature_id[2002].value ><br>threshold=0.3402601182460785  |
| node_10: feature_name=cg26016985               | feature_id[4407].value ><br>threshold=0.6493876278400421  |
| node_16: feature_name=cg23157618               | feature_id[5511].value ><br>threshold=0.5759606957435608  |
| node_20: feature_name=cg10480329               | feature_id[1439].value ><br>threshold=0.5518321692943573  |
| node_48: feature_name=cg17843418               | feature_id[4868].value ><br>threshold=0.34969255328178406 |
| node_52: feature_name=cg24407065               | feature_id[4522].value ><br>threshold=0.5364363789558411  |
| node_56: feature_name=cg07281938               | feature_id[249].value ><br>threshold=0.7506992518901825   |
| node_78: feature_name=cg21759907               | feature_id[1650].value ><br>threshold=0.46823520958423615 |
| node_98: feature_name=cg10886334               | feature_id[3975].value ><br>threshold=0.43698127567768097 |
| node_102: feature_name=cg09373983              | feature_id[5025].value ><br>threshold=0.5575815737247467  |
| node_106: feature_name=cg12948116              | feature_id[5360].value <=<br>threshold=0.5658791363239288 |
| node_107: feature_name=cg21906519              | feature_id[5251].value ><br>threshold=0.6089984774589539  |
| node_111: feature_name=cg17537493              | feature_id[4217].value <=<br>threshold=0.5825372636318207 |
| node_112: feature_name=cg07260789              | feature_id[1074].value ><br>threshold=0.8945248425006866  |
| node_114: feature_name=cg11251006              | feature_id[4182].value <=<br>threshold=0.7591733336448669 |
| Class: epithelioid haemangioendothelioma (EHE) |                                                           |
|                                                |                                                           |
| Rules_167                                      | passed counts:1                                           |
| node_0: feature_name=cg11915444                | feature_id[2002].value ><br>threshold=0.3402601182460785  |
| node_10: feature_name=cg26016985               | feature_id[4407].value ><br>threshold=0.6493876278400421  |
| node_16: feature_name=cg23157618               | feature_id[5511].value ><br>threshold=0.5759606957435608  |

|                                      |                                                           |
|--------------------------------------|-----------------------------------------------------------|
| node_20: feature_name=cg10480329     | feature_id[1439].value ><br>threshold=0.5518321692943573  |
| node_48: feature_name=cg17843418     | feature_id[4868].value ><br>threshold=0.34969255328178406 |
| node_52: feature_name=cg24407065     | feature_id[4522].value ><br>threshold=0.5364363789558411  |
| node_56: feature_name=cg07281938     | feature_id[249].value ><br>threshold=0.7506992518901825   |
| node_78: feature_name=cg21759907     | feature_id[1650].value ><br>threshold=0.46823520958423615 |
| node_98: feature_name=cg10886334     | feature_id[3975].value ><br>threshold=0.43698127567768097 |
| node_102: feature_name=cg09373983    | feature_id[5025].value ><br>threshold=0.5575815737247467  |
| node_106: feature_name=cg12948116    | feature_id[5360].value <=<br>threshold=0.5658791363239288 |
| node_107: feature_name=cg21906519    | feature_id[5251].value <=<br>threshold=0.6089984774589539 |
| node_108: feature_name=cg05288253    | feature_id[559].value <=<br>threshold=0.28334617614746094 |
| Class: solitary fibrous tumour (SFT) |                                                           |
|                                      |                                                           |
| Rules_168                            | passed counts:1                                           |
| node_0: feature_name=cg11915444      | feature_id[2002].value ><br>threshold=0.3402601182460785  |
| node_10: feature_name=cg26016985     | feature_id[4407].value ><br>threshold=0.6493876278400421  |
| node_16: feature_name=cg23157618     | feature_id[5511].value ><br>threshold=0.5759606957435608  |
| node_20: feature_name=cg10480329     | feature_id[1439].value ><br>threshold=0.5518321692943573  |
| node_48: feature_name=cg17843418     | feature_id[4868].value ><br>threshold=0.34969255328178406 |
| node_52: feature_name=cg24407065     | feature_id[4522].value ><br>threshold=0.5364363789558411  |
| node_56: feature_name=cg07281938     | feature_id[249].value ><br>threshold=0.7506992518901825   |
| node_78: feature_name=cg21759907     | feature_id[1650].value ><br>threshold=0.46823520958423615 |
| node_98: feature_name=cg10886334     | feature_id[3975].value ><br>threshold=0.43698127567768097 |
| node_102: feature_name=cg09373983    | feature_id[5025].value <=<br>threshold=0.5575815737247467 |

|                                         |                                                            |
|-----------------------------------------|------------------------------------------------------------|
| node_103: feature_name=cg07642499       | feature_id[3026].value <=<br>threshold=0.7077974379062653  |
| Class: myxoid liposarcoma (MLS)         |                                                            |
| Rules_169                               | passed counts:1                                            |
| node_0: feature_name=cg11915444         | feature_id[2002].value ><br>threshold=0.3402601182460785   |
| node_10: feature_name=cg26016985        | feature_id[4407].value ><br>threshold=0.6493876278400421   |
| node_16: feature_name=cg23157618        | feature_id[5511].value ><br>threshold=0.5759606957435608   |
| node_20: feature_name=cg10480329        | feature_id[1439].value ><br>threshold=0.5518321692943573   |
| node_48: feature_name=cg17843418        | feature_id[4868].value ><br>threshold=0.34969255328178406  |
| node_52: feature_name=cg24407065        | feature_id[4522].value ><br>threshold=0.5364363789558411   |
| node_56: feature_name=cg07281938        | feature_id[249].value ><br>threshold=0.7506992518901825    |
| node_78: feature_name=cg21759907        | feature_id[1650].value ><br>threshold=0.46823520958423615  |
| node_98: feature_name=cg10886334        | feature_id[3975].value <=<br>threshold=0.43698127567768097 |
| node_99: feature_name=cg08091706        | feature_id[4506].value <=<br>threshold=0.7506741881370544  |
| Class: undifferentiated sarcoma (USARC) |                                                            |
| Rules_170                               | passed counts:1                                            |
| node_0: feature_name=cg11915444         | feature_id[2002].value ><br>threshold=0.3402601182460785   |
| node_10: feature_name=cg26016985        | feature_id[4407].value ><br>threshold=0.6493876278400421   |
| node_16: feature_name=cg23157618        | feature_id[5511].value ><br>threshold=0.5759606957435608   |
| node_20: feature_name=cg10480329        | feature_id[1439].value ><br>threshold=0.5518321692943573   |
| node_48: feature_name=cg17843418        | feature_id[4868].value ><br>threshold=0.34969255328178406  |
| node_52: feature_name=cg24407065        | feature_id[4522].value ><br>threshold=0.5364363789558411   |
| node_56: feature_name=cg07281938        | feature_id[249].value ><br>threshold=0.7506992518901825    |

|                                                  |                                                            |
|--------------------------------------------------|------------------------------------------------------------|
| node_78: feature_name=cg21759907                 | feature_id[1650].value <=<br>threshold=0.46823520958423615 |
| node_79: feature_name=cg25476129                 | feature_id[2302].value ><br>threshold=0.1687404215335846   |
| node_93: feature_name=cg16318412                 | feature_id[1590].value ><br>threshold=0.9159156084060669   |
| node_95: feature_name=cg07577934                 | feature_id[3731].value ><br>threshold=0.7088948488235474   |
| Class: angioleiomyoma (ALMO)/myopericytoma (MPC) |                                                            |
|                                                  |                                                            |
| Rules_171                                        | passed counts:1                                            |
| node_0: feature_name=cg11915444                  | feature_id[2002].value ><br>threshold=0.3402601182460785   |
| node_10: feature_name=cg26016985                 | feature_id[4407].value ><br>threshold=0.6493876278400421   |
| node_16: feature_name=cg23157618                 | feature_id[5511].value ><br>threshold=0.5759606957435608   |
| node_20: feature_name=cg10480329                 | feature_id[1439].value ><br>threshold=0.5518321692943573   |
| node_48: feature_name=cg17843418                 | feature_id[4868].value ><br>threshold=0.34969255328178406  |
| node_52: feature_name=cg24407065                 | feature_id[4522].value ><br>threshold=0.5364363789558411   |
| node_56: feature_name=cg07281938                 | feature_id[249].value ><br>threshold=0.7506992518901825    |
| node_78: feature_name=cg21759907                 | feature_id[1650].value <=<br>threshold=0.46823520958423615 |
| node_79: feature_name=cg25476129                 | feature_id[2302].value ><br>threshold=0.1687404215335846   |
| node_93: feature_name=cg16318412                 | feature_id[1590].value ><br>threshold=0.9159156084060669   |
| node_95: feature_name=cg07577934                 | feature_id[3731].value <=<br>threshold=0.7088948488235474  |
| Class: undifferentiated sarcoma (USARC)          |                                                            |
|                                                  |                                                            |
| Rules_172                                        | passed counts:1                                            |
| node_0: feature_name=cg11915444                  | feature_id[2002].value ><br>threshold=0.3402601182460785   |
| node_10: feature_name=cg26016985                 | feature_id[4407].value ><br>threshold=0.6493876278400421   |
| node_16: feature_name=cg23157618                 | feature_id[5511].value ><br>threshold=0.5759606957435608   |

|                                                  |                                                            |
|--------------------------------------------------|------------------------------------------------------------|
| node_20: feature_name=cg10480329                 | feature_id[1439].value ><br>threshold=0.5518321692943573   |
| node_48: feature_name=cg17843418                 | feature_id[4868].value ><br>threshold=0.34969255328178406  |
| node_52: feature_name=cg24407065                 | feature_id[4522].value ><br>threshold=0.5364363789558411   |
| node_56: feature_name=cg07281938                 | feature_id[249].value ><br>threshold=0.7506992518901825    |
| node_78: feature_name=cg21759907                 | feature_id[1650].value <=<br>threshold=0.46823520958423615 |
| node_79: feature_name=cg25476129                 | feature_id[2302].value <=<br>threshold=0.1687404215335846  |
| node_80: feature_name=cg26362368                 | feature_id[414].value <=<br>threshold=0.834072083234787    |
| node_81: feature_name=cg15881332                 | feature_id[154].value <=<br>threshold=0.7577665150165558   |
| node_82: feature_name=cg14651518                 | feature_id[1456].value <=<br>threshold=0.7856765985488892  |
| node_83: feature_name=cg08132573                 | feature_id[40].value ><br>threshold=0.740606278181076      |
| node_85: feature_name=cg09464883                 | feature_id[3924].value ><br>threshold=0.7645087838172913   |
| node_87: feature_name=cg19509663                 | feature_id[2011].value ><br>threshold=0.4913187026977539   |
| Class: angioleiomyoma (ALMO)/myopericytoma (MPC) |                                                            |
|                                                  |                                                            |
| Rules_173                                        | passed counts:1                                            |
| node_0: feature_name=cg11915444                  | feature_id[2002].value ><br>threshold=0.3402601182460785   |
| node_10: feature_name=cg26016985                 | feature_id[4407].value ><br>threshold=0.6493876278400421   |
| node_16: feature_name=cg23157618                 | feature_id[5511].value ><br>threshold=0.5759606957435608   |
| node_20: feature_name=cg10480329                 | feature_id[1439].value ><br>threshold=0.5518321692943573   |
| node_48: feature_name=cg17843418                 | feature_id[4868].value ><br>threshold=0.34969255328178406  |
| node_52: feature_name=cg24407065                 | feature_id[4522].value ><br>threshold=0.5364363789558411   |
| node_56: feature_name=cg07281938                 | feature_id[249].value ><br>threshold=0.7506992518901825    |

|                                                         |                                                            |
|---------------------------------------------------------|------------------------------------------------------------|
| node_78: feature_name=cg21759907                        | feature_id[1650].value <=<br>threshold=0.46823520958423615 |
| node_79: feature_name=cg25476129                        | feature_id[2302].value <=<br>threshold=0.1687404215335846  |
| node_80: feature_name=cg26362368                        | feature_id[414].value <=<br>threshold=0.834072083234787    |
| node_81: feature_name=cg15881332                        | feature_id[154].value <=<br>threshold=0.7577665150165558   |
| node_82: feature_name=cg14651518                        | feature_id[1456].value <=<br>threshold=0.7856765985488892  |
| node_83: feature_name=cg08132573                        | feature_id[40].value ><br>threshold=0.740606278181076      |
| node_85: feature_name=cg09464883                        | feature_id[3924].value ><br>threshold=0.7645087838172913   |
| node_87: feature_name=cg19509663                        | feature_id[2011].value <=<br>threshold=0.4913187026977539  |
| Class: low-grade endometrial stromal sarcoma (ESS (LG)) |                                                            |
|                                                         |                                                            |
| Rules_174                                               | passed counts:1                                            |
| node_0: feature_name=cg11915444                         | feature_id[2002].value ><br>threshold=0.3402601182460785   |
| node_10: feature_name=cg26016985                        | feature_id[4407].value ><br>threshold=0.6493876278400421   |
| node_16: feature_name=cg23157618                        | feature_id[5511].value ><br>threshold=0.5759606957435608   |
| node_20: feature_name=cg10480329                        | feature_id[1439].value ><br>threshold=0.5518321692943573   |
| node_48: feature_name=cg17843418                        | feature_id[4868].value ><br>threshold=0.34969255328178406  |
| node_52: feature_name=cg24407065                        | feature_id[4522].value ><br>threshold=0.5364363789558411   |
| node_56: feature_name=cg07281938                        | feature_id[249].value ><br>threshold=0.7506992518901825    |
| node_78: feature_name=cg21759907                        | feature_id[1650].value <=<br>threshold=0.46823520958423615 |
| node_79: feature_name=cg25476129                        | feature_id[2302].value <=<br>threshold=0.1687404215335846  |
| node_80: feature_name=cg26362368                        | feature_id[414].value <=<br>threshold=0.834072083234787    |
| node_81: feature_name=cg15881332                        | feature_id[154].value <=<br>threshold=0.7577665150165558   |



|                                        |                                                            |
|----------------------------------------|------------------------------------------------------------|
| node_82: feature_name=cg14651518       | feature_id[1456].value <=<br>threshold=0.7856765985488892  |
| node_83: feature_name=cg08132573       | feature_id[40].value ><br>threshold=0.740606278181076      |
| node_85: feature_name=cg09464883       | feature_id[3924].value <=<br>threshold=0.7645087838172913  |
| Class: schwannoma (SWN)                |                                                            |
| Rules_175                              | passed counts:1                                            |
| node_0: feature_name=cg11915444        | feature_id[2002].value ><br>threshold=0.3402601182460785   |
| node_10: feature_name=cg26016985       | feature_id[4407].value ><br>threshold=0.6493876278400421   |
| node_16: feature_name=cg23157618       | feature_id[5511].value ><br>threshold=0.5759606957435608   |
| node_20: feature_name=cg10480329       | feature_id[1439].value ><br>threshold=0.5518321692943573   |
| node_48: feature_name=cg17843418       | feature_id[4868].value ><br>threshold=0.34969255328178406  |
| node_52: feature_name=cg24407065       | feature_id[4522].value ><br>threshold=0.5364363789558411   |
| node_56: feature_name=cg07281938       | feature_id[249].value ><br>threshold=0.7506992518901825    |
| node_78: feature_name=cg21759907       | feature_id[1650].value <=<br>threshold=0.46823520958423615 |
| node_79: feature_name=cg25476129       | feature_id[2302].value <=<br>threshold=0.1687404215335846  |
| node_80: feature_name=cg26362368       | feature_id[414].value <=<br>threshold=0.834072083234787    |
| node_81: feature_name=cg15881332       | feature_id[154].value <=<br>threshold=0.7577665150165558   |
| node_82: feature_name=cg14651518       | feature_id[1456].value <=<br>threshold=0.7856765985488892  |
| node_83: feature_name=cg08132573       | feature_id[40].value <=<br>threshold=0.740606278181076     |
| Class: malignant rhabdoid tumour (MRT) |                                                            |
| Rules_176                              | passed counts:1                                            |
| node_0: feature_name=cg11915444        | feature_id[2002].value ><br>threshold=0.3402601182460785   |
| node_10: feature_name=cg26016985       | feature_id[4407].value ><br>threshold=0.6493876278400421   |

|                                  |                                                           |
|----------------------------------|-----------------------------------------------------------|
| node_16: feature_name=cg23157618 | feature_id[5511].value ><br>threshold=0.5759606957435608  |
| node_20: feature_name=cg10480329 | feature_id[1439].value ><br>threshold=0.5518321692943573  |
| node_48: feature_name=cg17843418 | feature_id[4868].value ><br>threshold=0.34969255328178406 |
| node_52: feature_name=cg24407065 | feature_id[4522].value ><br>threshold=0.5364363789558411  |
| node_56: feature_name=cg07281938 | feature_id[249].value <=<br>threshold=0.7506992518901825  |
| node_57: feature_name=cg21189849 | feature_id[1261].value ><br>threshold=0.7545044124126434  |
| node_63: feature_name=cg18048309 | feature_id[2794].value ><br>threshold=0.36701037734746933 |
| node_65: feature_name=cg05851887 | feature_id[4211].value <=<br>threshold=0.7704950571060181 |
| node_66: feature_name=cg22575379 | feature_id[2711].value ><br>threshold=0.4320530295372009  |
| node_68: feature_name=cg02053092 | feature_id[3610].value ><br>threshold=0.7796373069286346  |
| node_70: feature_name=cg12129983 | feature_id[4781].value ><br>threshold=0.649698406457901   |
| node_72: feature_name=cg12011299 | feature_id[4765].value ><br>threshold=0.49161551892757416 |
| node_74: feature_name=cg04847386 | feature_id[2852].value ><br>threshold=0.8453048467636108  |
| Class: leiomyosarcoma (LMS)      |                                                           |
|                                  |                                                           |
| Rules_177                        | passed counts:1                                           |
| node_0: feature_name=cg11915444  | feature_id[2002].value ><br>threshold=0.3402601182460785  |
| node_10: feature_name=cg26016985 | feature_id[4407].value ><br>threshold=0.6493876278400421  |
| node_16: feature_name=cg23157618 | feature_id[5511].value ><br>threshold=0.5759606957435608  |
| node_20: feature_name=cg10480329 | feature_id[1439].value ><br>threshold=0.5518321692943573  |
| node_48: feature_name=cg17843418 | feature_id[4868].value ><br>threshold=0.34969255328178406 |
| node_52: feature_name=cg24407065 | feature_id[4522].value ><br>threshold=0.5364363789558411  |
| node_56: feature_name=cg07281938 | feature_id[249].value <=<br>threshold=0.7506992518901825  |

|                                               |                                                           |
|-----------------------------------------------|-----------------------------------------------------------|
| node_57: feature_name=cg21189849              | feature_id[1261].value ><br>threshold=0.7545044124126434  |
| node_63: feature_name=cg18048309              | feature_id[2794].value ><br>threshold=0.36701037734746933 |
| node_65: feature_name=cg05851887              | feature_id[4211].value <=<br>threshold=0.7704950571060181 |
| node_66: feature_name=cg22575379              | feature_id[2711].value ><br>threshold=0.4320530295372009  |
| node_68: feature_name=cg02053092              | feature_id[3610].value ><br>threshold=0.7796373069286346  |
| node_70: feature_name=cg12129983              | feature_id[4781].value ><br>threshold=0.649698406457901   |
| node_72: feature_name=cg12011299              | feature_id[4765].value ><br>threshold=0.49161551892757416 |
| node_74: feature_name=cg04847386              | feature_id[2852].value <=<br>threshold=0.8453048467636108 |
| Class: angiomatoid fibrous histiocytoma (AFH) |                                                           |
| Rules_178                                     | passed counts:1                                           |
| node_0: feature_name=cg11915444               | feature_id[2002].value ><br>threshold=0.3402601182460785  |
| node_10: feature_name=cg26016985              | feature_id[4407].value ><br>threshold=0.6493876278400421  |
| node_16: feature_name=cg23157618              | feature_id[5511].value ><br>threshold=0.5759606957435608  |
| node_20: feature_name=cg10480329              | feature_id[1439].value ><br>threshold=0.5518321692943573  |
| node_48: feature_name=cg17843418              | feature_id[4868].value ><br>threshold=0.34969255328178406 |
| node_52: feature_name=cg24407065              | feature_id[4522].value ><br>threshold=0.5364363789558411  |
| node_56: feature_name=cg07281938              | feature_id[249].value <=<br>threshold=0.7506992518901825  |
| node_57: feature_name=cg21189849              | feature_id[1261].value ><br>threshold=0.7545044124126434  |
| node_63: feature_name=cg18048309              | feature_id[2794].value ><br>threshold=0.36701037734746933 |
| node_65: feature_name=cg05851887              | feature_id[4211].value <=<br>threshold=0.7704950571060181 |
| node_66: feature_name=cg22575379              | feature_id[2711].value ><br>threshold=0.4320530295372009  |
| node_68: feature_name=cg02053092              | feature_id[3610].value ><br>threshold=0.7796373069286346  |

|                                                  |                                                            |
|--------------------------------------------------|------------------------------------------------------------|
| node_70: feature_name=cg12129983                 | feature_id[4781].value ><br>threshold=0.649698406457901    |
| node_72: feature_name=cg12011299                 | feature_id[4765].value <=<br>threshold=0.49161551892757416 |
| Class: angioleiomyoma (ALMO)/myopericytoma (MPC) |                                                            |
|                                                  |                                                            |
| Rules_179                                        | passed counts:1                                            |
| node_0: feature_name=cg11915444                  | feature_id[2002].value ><br>threshold=0.3402601182460785   |
| node_10: feature_name=cg26016985                 | feature_id[4407].value ><br>threshold=0.6493876278400421   |
| node_16: feature_name=cg23157618                 | feature_id[5511].value ><br>threshold=0.5759606957435608   |
| node_20: feature_name=cg10480329                 | feature_id[1439].value ><br>threshold=0.5518321692943573   |
| node_48: feature_name=cg17843418                 | feature_id[4868].value ><br>threshold=0.34969255328178406  |
| node_52: feature_name=cg24407065                 | feature_id[4522].value ><br>threshold=0.5364363789558411   |
| node_56: feature_name=cg07281938                 | feature_id[249].value <=<br>threshold=0.7506992518901825   |
| node_57: feature_name=cg21189849                 | feature_id[1261].value ><br>threshold=0.7545044124126434   |
| node_63: feature_name=cg18048309                 | feature_id[2794].value ><br>threshold=0.36701037734746933  |
| node_65: feature_name=cg05851887                 | feature_id[4211].value <=<br>threshold=0.7704950571060181  |
| node_66: feature_name=cg22575379                 | feature_id[2711].value ><br>threshold=0.4320530295372009   |
| node_68: feature_name=cg02053092                 | feature_id[3610].value ><br>threshold=0.7796373069286346   |
| node_70: feature_name=cg12129983                 | feature_id[4781].value <=<br>threshold=0.649698406457901   |
| Class: solitary fibrous tumour (SFT)             |                                                            |
|                                                  |                                                            |
| Rules_180                                        | passed counts:1                                            |
| node_0: feature_name=cg11915444                  | feature_id[2002].value ><br>threshold=0.3402601182460785   |
| node_10: feature_name=cg26016985                 | feature_id[4407].value ><br>threshold=0.6493876278400421   |
| node_16: feature_name=cg23157618                 | feature_id[5511].value ><br>threshold=0.5759606957435608   |

|                                  |                                                           |
|----------------------------------|-----------------------------------------------------------|
| node_20: feature_name=cg10480329 | feature_id[1439].value ><br>threshold=0.5518321692943573  |
| node_48: feature_name=cg17843418 | feature_id[4868].value ><br>threshold=0.34969255328178406 |
| node_52: feature_name=cg24407065 | feature_id[4522].value ><br>threshold=0.5364363789558411  |
| node_56: feature_name=cg07281938 | feature_id[249].value <=<br>threshold=0.7506992518901825  |
| node_57: feature_name=cg21189849 | feature_id[1261].value ><br>threshold=0.7545044124126434  |
| node_63: feature_name=cg18048309 | feature_id[2794].value ><br>threshold=0.36701037734746933 |
| node_65: feature_name=cg05851887 | feature_id[4211].value <=<br>threshold=0.7704950571060181 |
| node_66: feature_name=cg22575379 | feature_id[2711].value ><br>threshold=0.4320530295372009  |
| node_68: feature_name=cg02053092 | feature_id[3610].value <=<br>threshold=0.7796373069286346 |
| Class: chondroblastoma (CB)      |                                                           |
|                                  |                                                           |
| Rules_181                        | passed counts:1                                           |
| node_0: feature_name=cg11915444  | feature_id[2002].value ><br>threshold=0.3402601182460785  |
| node_10: feature_name=cg26016985 | feature_id[4407].value ><br>threshold=0.6493876278400421  |
| node_16: feature_name=cg23157618 | feature_id[5511].value ><br>threshold=0.5759606957435608  |
| node_20: feature_name=cg10480329 | feature_id[1439].value ><br>threshold=0.5518321692943573  |
| node_48: feature_name=cg17843418 | feature_id[4868].value ><br>threshold=0.34969255328178406 |
| node_52: feature_name=cg24407065 | feature_id[4522].value ><br>threshold=0.5364363789558411  |
| node_56: feature_name=cg07281938 | feature_id[249].value <=<br>threshold=0.7506992518901825  |
| node_57: feature_name=cg21189849 | feature_id[1261].value <=<br>threshold=0.7545044124126434 |
| node_58: feature_name=cg11960033 | feature_id[260].value <=<br>threshold=0.7065970599651337  |
| node_59: feature_name=cg18148375 | feature_id[1524].value ><br>threshold=0.6905054450035095  |
| Class: fibrous dysplasia (FDY)   |                                                           |
|                                  |                                                           |

|                                               |                                                            |
|-----------------------------------------------|------------------------------------------------------------|
| Rules_182                                     | passed counts:1                                            |
| node_0: feature_name=cg11915444               | feature_id[2002].value ><br>threshold=0.3402601182460785   |
| node_10: feature_name=cg26016985              | feature_id[4407].value ><br>threshold=0.6493876278400421   |
| node_16: feature_name=cg23157618              | feature_id[5511].value ><br>threshold=0.5759606957435608   |
| node_20: feature_name=cg10480329              | feature_id[1439].value ><br>threshold=0.5518321692943573   |
| node_48: feature_name=cg17843418              | feature_id[4868].value ><br>threshold=0.34969255328178406  |
| node_52: feature_name=cg24407065              | feature_id[4522].value <=<br>threshold=0.5364363789558411  |
| node_53: feature_name=cg27049344              | feature_id[5181].value ><br>threshold=0.9606902599334717   |
| Class: embryonal rhabdomyosarcoma (RMS (EMB)) |                                                            |
|                                               |                                                            |
| Rules_183                                     | passed counts:1                                            |
| node_0: feature_name=cg11915444               | feature_id[2002].value ><br>threshold=0.3402601182460785   |
| node_10: feature_name=cg26016985              | feature_id[4407].value ><br>threshold=0.6493876278400421   |
| node_16: feature_name=cg23157618              | feature_id[5511].value ><br>threshold=0.5759606957435608   |
| node_20: feature_name=cg10480329              | feature_id[1439].value ><br>threshold=0.5518321692943573   |
| node_48: feature_name=cg17843418              | feature_id[4868].value <=<br>threshold=0.34969255328178406 |
| node_49: feature_name=cg06551007              | feature_id[1675].value <=<br>threshold=0.44745437800884247 |
| Class: melanoma (MEL)                         |                                                            |
|                                               |                                                            |
| Rules_184                                     | passed counts:1                                            |
| node_0: feature_name=cg11915444               | feature_id[2002].value ><br>threshold=0.3402601182460785   |
| node_10: feature_name=cg26016985              | feature_id[4407].value ><br>threshold=0.6493876278400421   |
| node_16: feature_name=cg23157618              | feature_id[5511].value ><br>threshold=0.5759606957435608   |
| node_20: feature_name=cg10480329              | feature_id[1439].value <=<br>threshold=0.5518321692943573  |

|                                         |                                                           |
|-----------------------------------------|-----------------------------------------------------------|
| node_21: feature_name=cg25510609        | feature_id[149].value ><br>threshold=0.08151235431432724  |
| node_39: feature_name=cg08726900        | feature_id[250].value ><br>threshold=0.5245974063873291   |
| node_41: feature_name=cg09040552        | feature_id[1285].value ><br>threshold=0.5485720634460449  |
| node_43: feature_name=cg18888464        | feature_id[4555].value ><br>threshold=0.0659504197537899  |
| node_45: feature_name=cg16461139        | feature_id[25].value ><br>threshold=0.7099440097808838    |
| Class: giant cell tumour of bone (GCTB) |                                                           |
|                                         |                                                           |
| Rules_185                               | passed counts:1                                           |
| node_0: feature_name=cg11915444         | feature_id[2002].value ><br>threshold=0.3402601182460785  |
| node_10: feature_name=cg26016985        | feature_id[4407].value ><br>threshold=0.6493876278400421  |
| node_16: feature_name=cg23157618        | feature_id[5511].value ><br>threshold=0.5759606957435608  |
| node_20: feature_name=cg10480329        | feature_id[1439].value <=<br>threshold=0.5518321692943573 |
| node_21: feature_name=cg25510609        | feature_id[149].value ><br>threshold=0.08151235431432724  |
| node_39: feature_name=cg08726900        | feature_id[250].value ><br>threshold=0.5245974063873291   |
| node_41: feature_name=cg09040552        | feature_id[1285].value ><br>threshold=0.5485720634460449  |
| node_43: feature_name=cg18888464        | feature_id[4555].value ><br>threshold=0.0659504197537899  |
| node_45: feature_name=cg16461139        | feature_id[25].value <=<br>threshold=0.7099440097808838   |
| Class: angiosarcoma (AS)                |                                                           |
|                                         |                                                           |
| Rules_186                               | passed counts:1                                           |
| node_0: feature_name=cg11915444         | feature_id[2002].value ><br>threshold=0.3402601182460785  |
| node_10: feature_name=cg26016985        | feature_id[4407].value ><br>threshold=0.6493876278400421  |
| node_16: feature_name=cg23157618        | feature_id[5511].value ><br>threshold=0.5759606957435608  |
| node_20: feature_name=cg10480329        | feature_id[1439].value <=<br>threshold=0.5518321692943573 |

|                                         |                                                           |
|-----------------------------------------|-----------------------------------------------------------|
| node_21: feature_name=cg25510609        | feature_id[149].value ><br>threshold=0.08151235431432724  |
| node_39: feature_name=cg08726900        | feature_id[250].value ><br>threshold=0.5245974063873291   |
| node_41: feature_name=cg09040552        | feature_id[1285].value ><br>threshold=0.5485720634460449  |
| node_43: feature_name=cg18888464        | feature_id[4555].value <=<br>threshold=0.0659504197537899 |
| Class: chondrosarcoma (CSA)             |                                                           |
| Rules_187                               | passed counts:1                                           |
| node_0: feature_name=cg11915444         | feature_id[2002].value ><br>threshold=0.3402601182460785  |
| node_10: feature_name=cg26016985        | feature_id[4407].value ><br>threshold=0.6493876278400421  |
| node_16: feature_name=cg23157618        | feature_id[5511].value ><br>threshold=0.5759606957435608  |
| node_20: feature_name=cg10480329        | feature_id[1439].value <=<br>threshold=0.5518321692943573 |
| node_21: feature_name=cg25510609        | feature_id[149].value ><br>threshold=0.08151235431432724  |
| node_39: feature_name=cg08726900        | feature_id[250].value ><br>threshold=0.5245974063873291   |
| node_41: feature_name=cg09040552        | feature_id[1285].value <=<br>threshold=0.5485720634460449 |
| Class: undifferentiated sarcoma (USARC) |                                                           |
| Rules_188                               | passed counts:1                                           |
| node_0: feature_name=cg11915444         | feature_id[2002].value ><br>threshold=0.3402601182460785  |
| node_10: feature_name=cg26016985        | feature_id[4407].value ><br>threshold=0.6493876278400421  |
| node_16: feature_name=cg23157618        | feature_id[5511].value ><br>threshold=0.5759606957435608  |
| node_20: feature_name=cg10480329        | feature_id[1439].value <=<br>threshold=0.5518321692943573 |
| node_21: feature_name=cg25510609        | feature_id[149].value <=<br>threshold=0.08151235431432724 |
| node_22: feature_name=cg23850277        | feature_id[2159].value <=<br>threshold=0.5682950615882874 |
| node_23: feature_name=cg01259126        | feature_id[3146].value ><br>threshold=0.34355829656124115 |



|                                                  |                                                            |
|--------------------------------------------------|------------------------------------------------------------|
| node_25: feature_name=cg07034004                 | feature_id[3345].value <=<br>threshold=0.20594919472932816 |
| node_26: feature_name=cg12895304                 | feature_id[651].value ><br>threshold=0.9125175774097443    |
| node_28: feature_name=cg02235663                 | feature_id[785].value ><br>threshold=0.4301222711801529    |
| node_30: feature_name=cg05242371                 | feature_id[687].value ><br>threshold=0.46140024065971375   |
| node_32: feature_name=cg20668718                 | feature_id[4160].value ><br>threshold=0.3259790688753128   |
| node_34: feature_name=cg21740826                 | feature_id[2704].value ><br>threshold=0.7765077352523804   |
| Class: inflammatory myofibroblastic tumour (IMT) |                                                            |
| Rules_189                                        | passed counts:1                                            |
| node_0: feature_name=cg11915444                  | feature_id[2002].value ><br>threshold=0.3402601182460785   |
| node_10: feature_name=cg26016985                 | feature_id[4407].value ><br>threshold=0.6493876278400421   |
| node_16: feature_name=cg23157618                 | feature_id[5511].value ><br>threshold=0.5759606957435608   |
| node_20: feature_name=cg10480329                 | feature_id[1439].value <=<br>threshold=0.5518321692943573  |
| node_21: feature_name=cg25510609                 | feature_id[149].value <=<br>threshold=0.08151235431432724  |
| node_22: feature_name=cg23850277                 | feature_id[2159].value <=<br>threshold=0.5682950615882874  |
| node_23: feature_name=cg01259126                 | feature_id[3146].value ><br>threshold=0.34355829656124115  |
| node_25: feature_name=cg07034004                 | feature_id[3345].value <=<br>threshold=0.20594919472932816 |
| node_26: feature_name=cg12895304                 | feature_id[651].value ><br>threshold=0.9125175774097443    |
| node_28: feature_name=cg02235663                 | feature_id[785].value ><br>threshold=0.4301222711801529    |
| node_30: feature_name=cg05242371                 | feature_id[687].value ><br>threshold=0.46140024065971375   |
| node_32: feature_name=cg20668718                 | feature_id[4160].value ><br>threshold=0.3259790688753128   |
| node_34: feature_name=cg21740826                 | feature_id[2704].value <=<br>threshold=0.7765077352523804  |
| Class: undifferentiated sarcoma (USARC)          |                                                            |

|                                               |                                                            |
|-----------------------------------------------|------------------------------------------------------------|
|                                               |                                                            |
| Rules_190                                     | passed counts:1                                            |
| node_0: feature_name=cg11915444               | feature_id[2002].value ><br>threshold=0.3402601182460785   |
| node_10: feature_name=cg26016985              | feature_id[4407].value ><br>threshold=0.6493876278400421   |
| node_16: feature_name=cg23157618              | feature_id[5511].value ><br>threshold=0.5759606957435608   |
| node_20: feature_name=cg10480329              | feature_id[1439].value <=<br>threshold=0.5518321692943573  |
| node_21: feature_name=cg25510609              | feature_id[149].value <=<br>threshold=0.08151235431432724  |
| node_22: feature_name=cg23850277              | feature_id[2159].value <=<br>threshold=0.5682950615882874  |
| node_23: feature_name=cg01259126              | feature_id[3146].value ><br>threshold=0.34355829656124115  |
| node_25: feature_name=cg07034004              | feature_id[3345].value <=<br>threshold=0.20594919472932816 |
| node_26: feature_name=cg12895304              | feature_id[651].value ><br>threshold=0.9125175774097443    |
| node_28: feature_name=cg02235663              | feature_id[785].value ><br>threshold=0.4301222711801529    |
| node_30: feature_name=cg05242371              | feature_id[687].value ><br>threshold=0.46140024065971375   |
| node_32: feature_name=cg20668718              | feature_id[4160].value <=<br>threshold=0.3259790688753128  |
| Class: clear cell sarcoma of soft parts (CCS) |                                                            |
|                                               |                                                            |
| Rules_191                                     | passed counts:1                                            |
| node_0: feature_name=cg11915444               | feature_id[2002].value ><br>threshold=0.3402601182460785   |
| node_10: feature_name=cg26016985              | feature_id[4407].value ><br>threshold=0.6493876278400421   |
| node_16: feature_name=cg23157618              | feature_id[5511].value ><br>threshold=0.5759606957435608   |
| node_20: feature_name=cg10480329              | feature_id[1439].value <=<br>threshold=0.5518321692943573  |
| node_21: feature_name=cg25510609              | feature_id[149].value <=<br>threshold=0.08151235431432724  |
| node_22: feature_name=cg23850277              | feature_id[2159].value <=<br>threshold=0.5682950615882874  |
| node_23: feature_name=cg01259126              | feature_id[3146].value ><br>threshold=0.34355829656124115  |

|                                               |                                                            |
|-----------------------------------------------|------------------------------------------------------------|
| node_25: feature_name=cg07034004              | feature_id[3345].value <=<br>threshold=0.20594919472932816 |
| node_26: feature_name=cg12895304              | feature_id[651].value ><br>threshold=0.9125175774097443    |
| node_28: feature_name=cg02235663              | feature_id[785].value ><br>threshold=0.4301222711801529    |
| node_30: feature_name=cg05242371              | feature_id[687].value <=<br>threshold=0.46140024065971375  |
| Class: epithelioid sarcoma (ES)               |                                                            |
|                                               |                                                            |
| Rules_192                                     | passed counts:1                                            |
| node_0: feature_name=cg11915444               | feature_id[2002].value ><br>threshold=0.3402601182460785   |
| node_10: feature_name=cg26016985              | feature_id[4407].value ><br>threshold=0.6493876278400421   |
| node_16: feature_name=cg23157618              | feature_id[5511].value <=<br>threshold=0.5759606957435608  |
| node_17: feature_name=cg23477348              | feature_id[3774].value <=<br>threshold=0.19775588810443878 |
| Class: sarcoma (SARC)                         |                                                            |
|                                               |                                                            |
| Rules_193                                     | passed counts:1                                            |
| node_0: feature_name=cg11915444               | feature_id[2002].value ><br>threshold=0.3402601182460785   |
| node_10: feature_name=cg26016985              | feature_id[4407].value <=<br>threshold=0.6493876278400421  |
| node_11: feature_name=cg14769121              | feature_id[1178].value ><br>threshold=0.8216802477836609   |
| node_13: feature_name=cg01254644              | feature_id[4106].value ><br>threshold=0.5698081851005554   |
| Class: Kaposi sarcoma (KS)                    |                                                            |
|                                               |                                                            |
| Rules_194                                     | passed counts:1                                            |
| node_0: feature_name=cg11915444               | feature_id[2002].value ><br>threshold=0.3402601182460785   |
| node_10: feature_name=cg26016985              | feature_id[4407].value <=<br>threshold=0.6493876278400421  |
| node_11: feature_name=cg14769121              | feature_id[1178].value ><br>threshold=0.8216802477836609   |
| node_13: feature_name=cg01254644              | feature_id[4106].value <=<br>threshold=0.5698081851005554  |
| Class: dermatofibrosarcoma protuberans (DFSP) |                                                            |
|                                               |                                                            |

|                                     |                                                            |
|-------------------------------------|------------------------------------------------------------|
| Rules_195                           | passed counts:1                                            |
| node_0: feature_name=cg11915444     | feature_id[2002].value <=<br>threshold=0.3402601182460785  |
| node_1: feature_name=cg17156862     | feature_id[2598].value <=<br>threshold=0.6409126222133636  |
| node_2: feature_name=cg08947774     | feature_id[1302].value <=<br>threshold=0.6231959313154221  |
| node_3: feature_name=cg10370025     | feature_id[4047].value ><br>threshold=0.7934649586677551   |
| node_5: feature_name=cg18653451     | feature_id[4856].value ><br>threshold=0.18988156504929066  |
| Class: angiosarcoma (AS)            |                                                            |
|                                     |                                                            |
| Rules_196                           | passed counts:1                                            |
| node_0: feature_name=cg11915444     | feature_id[2002].value <=<br>threshold=0.3402601182460785  |
| node_1: feature_name=cg17156862     | feature_id[2598].value <=<br>threshold=0.6409126222133636  |
| node_2: feature_name=cg08947774     | feature_id[1302].value <=<br>threshold=0.6231959313154221  |
| node_3: feature_name=cg10370025     | feature_id[4047].value ><br>threshold=0.7934649586677551   |
| node_5: feature_name=cg18653451     | feature_id[4856].value <=<br>threshold=0.18988156504929066 |
| Class: chordoma (CHORD)             |                                                            |
|                                     |                                                            |
| Rules_197                           | passed counts:1                                            |
| node_0: feature_name=cg11915444     | feature_id[2002].value <=<br>threshold=0.3402601182460785  |
| node_1: feature_name=cg17156862     | feature_id[2598].value <=<br>threshold=0.6409126222133636  |
| node_2: feature_name=cg08947774     | feature_id[1302].value <=<br>threshold=0.6231959313154221  |
| node_3: feature_name=cg10370025     | feature_id[4047].value <=<br>threshold=0.7934649586677551  |
| Class: infantile fibrosarcoma (IFS) |                                                            |
