# Supplementary material for: Identification of Methylation Signatures and Rules for Sarcoma Subtypes by Machine Learning Methods
Source: Hindawi journal article supplement (doi:10.1155/2022/5297235), 2022-01-01
Supplement: f1 [file 5297235.f1.zip]

**Table S3:** Performance of IFS with different classification algorithms on three feature lists.

(1) IFS results with RF on the LASSO feature list

| Number of features | ACC   | MCC   | Macro F1 | Weighted F1 |
|--------------------|-------|-------|----------|-------------|
| 10                 | 0.802 | 0.797 | 0.830    | 0.797       |
| 20                 | 0.929 | 0.927 | 0.942    | 0.928       |
| 30                 | 0.950 | 0.948 | 0.960    | 0.949       |
| 40                 | 0.962 | 0.961 | 0.971    | 0.962       |
| 50                 | 0.961 | 0.960 | 0.969    | 0.960       |
| 60                 | 0.957 | 0.956 | 0.968    | 0.956       |
| 70                 | 0.963 | 0.962 | 0.971    | 0.962       |
| 80                 | 0.961 | 0.960 | 0.970    | 0.960       |
| 90                 | 0.969 | 0.968 | 0.977    | 0.968       |
| 100                | 0.964 | 0.963 | 0.974    | 0.963       |
| 110                | 0.971 | 0.971 | 0.980    | 0.971       |
| 120                | 0.970 | 0.969 | 0.977    | 0.969       |
| 130                | 0.974 | 0.973 | 0.980    | 0.973       |
| 140                | 0.972 | 0.971 | 0.980    | 0.971       |
| 150                | 0.971 | 0.971 | 0.980    | 0.971       |
| 160                | 0.973 | 0.972 | 0.979    | 0.972       |
| 170                | 0.978 | 0.977 | 0.986    | 0.977       |
| 180                | 0.969 | 0.968 | 0.978    | 0.968       |
| 190                | 0.973 | 0.972 | 0.979    | 0.972       |
| 200                | 0.974 | 0.973 | 0.981    | 0.973       |
| 210                | 0.971 | 0.970 | 0.981    | 0.970       |
| 220                | 0.974 | 0.973 | 0.981    | 0.973       |
| 230                | 0.973 | 0.972 | 0.980    | 0.972       |
| 240                | 0.978 | 0.977 | 0.984    | 0.977       |
| 250                | 0.978 | 0.977 | 0.983    | 0.977       |
| 260                | 0.974 | 0.973 | 0.980    | 0.974       |
| 270                | 0.976 | 0.976 | 0.982    | 0.976       |
| 280                | 0.977 | 0.976 | 0.984    | 0.976       |
| 290                | 0.978 | 0.978 | 0.985    | 0.978       |
| 300                | 0.977 | 0.976 | 0.983    | 0.977       |
| 310                | 0.977 | 0.976 | 0.983    | 0.976       |
| 320                | 0.978 | 0.978 | 0.985    | 0.978       |
| 330                | 0.977 | 0.976 | 0.984    | 0.977       |
| 340                | 0.978 | 0.977 | 0.984    | 0.977       |
| 350                | 0.980 | 0.979 | 0.987    | 0.979       |
| 360                | 0.977 | 0.976 | 0.985    | 0.977       |
| 370                | 0.976 | 0.975 | 0.984    | 0.975       |
| 380                | 0.979 | 0.978 | 0.985    | 0.979       |

|     |       |       |       |       |
|-----|-------|-------|-------|-------|
| 390 | 0.976 | 0.976 | 0.981 | 0.976 |
| 400 | 0.971 | 0.971 | 0.980 | 0.971 |
| 410 | 0.978 | 0.977 | 0.985 | 0.977 |
| 420 | 0.979 | 0.978 | 0.984 | 0.978 |
| 430 | 0.982 | 0.981 | 0.986 | 0.981 |
| 440 | 0.982 | 0.982 | 0.987 | 0.982 |
| 450 | 0.973 | 0.972 | 0.980 | 0.972 |
| 460 | 0.980 | 0.980 | 0.986 | 0.980 |
| 470 | 0.978 | 0.977 | 0.983 | 0.977 |
| 480 | 0.980 | 0.980 | 0.986 | 0.980 |
| 490 | 0.977 | 0.976 | 0.983 | 0.976 |
| 500 | 0.980 | 0.979 | 0.986 | 0.979 |
| 510 | 0.976 | 0.975 | 0.983 | 0.975 |
| 520 | 0.977 | 0.976 | 0.983 | 0.976 |
| 530 | 0.979 | 0.978 | 0.984 | 0.978 |
| 540 | 0.976 | 0.976 | 0.982 | 0.976 |
| 550 | 0.980 | 0.979 | 0.986 | 0.979 |
| 560 | 0.974 | 0.973 | 0.982 | 0.973 |
| 570 | 0.977 | 0.976 | 0.984 | 0.976 |
| 580 | 0.980 | 0.980 | 0.987 | 0.980 |
| 590 | 0.980 | 0.980 | 0.986 | 0.980 |
| 600 | 0.976 | 0.976 | 0.981 | 0.976 |
| 610 | 0.980 | 0.980 | 0.986 | 0.980 |
| 620 | 0.980 | 0.980 | 0.986 | 0.980 |
| 630 | 0.979 | 0.978 | 0.984 | 0.978 |
| 640 | 0.978 | 0.978 | 0.985 | 0.978 |
| 650 | 0.980 | 0.979 | 0.983 | 0.979 |
| 660 | 0.979 | 0.978 | 0.984 | 0.979 |
| 670 | 0.980 | 0.979 | 0.984 | 0.979 |
| 680 | 0.981 | 0.980 | 0.987 | 0.981 |
| 690 | 0.980 | 0.979 | 0.984 | 0.979 |
| 700 | 0.975 | 0.974 | 0.981 | 0.974 |
| 710 | 0.978 | 0.978 | 0.984 | 0.978 |
| 720 | 0.978 | 0.977 | 0.983 | 0.977 |
| 730 | 0.978 | 0.977 | 0.983 | 0.977 |
| 740 | 0.978 | 0.978 | 0.984 | 0.978 |
| 750 | 0.980 | 0.979 | 0.987 | 0.979 |
| 760 | 0.981 | 0.980 | 0.987 | 0.980 |
| 770 | 0.979 | 0.978 | 0.984 | 0.978 |
| 780 | 0.976 | 0.975 | 0.985 | 0.975 |
| 790 | 0.982 | 0.981 | 0.988 | 0.981 |
| 800 | 0.981 | 0.980 | 0.987 | 0.981 |
| 810 | 0.980 | 0.980 | 0.986 | 0.980 |

|      |       |       |       |       |
|------|-------|-------|-------|-------|
| 820  | 0.979 | 0.978 | 0.986 | 0.978 |
| 830  | 0.981 | 0.980 | 0.987 | 0.980 |
| 840  | 0.981 | 0.980 | 0.986 | 0.980 |
| 850  | 0.976 | 0.976 | 0.984 | 0.976 |
| 860  | 0.982 | 0.982 | 0.986 | 0.982 |
| 870  | 0.980 | 0.979 | 0.985 | 0.979 |
| 880  | 0.980 | 0.980 | 0.985 | 0.980 |
| 890  | 0.983 | 0.983 | 0.987 | 0.983 |
| 900  | 0.978 | 0.978 | 0.984 | 0.978 |
| 910  | 0.981 | 0.980 | 0.987 | 0.981 |
| 920  | 0.979 | 0.978 | 0.985 | 0.979 |
| 930  | 0.979 | 0.978 | 0.986 | 0.978 |
| 940  | 0.980 | 0.980 | 0.985 | 0.980 |
| 950  | 0.980 | 0.980 | 0.986 | 0.980 |
| 960  | 0.981 | 0.980 | 0.986 | 0.981 |
| 970  | 0.980 | 0.980 | 0.985 | 0.980 |
| 980  | 0.979 | 0.978 | 0.985 | 0.978 |
| 990  | 0.981 | 0.980 | 0.987 | 0.980 |
| 1000 | 0.980 | 0.980 | 0.986 | 0.980 |
| 1010 | 0.980 | 0.979 | 0.985 | 0.979 |
| 1020 | 0.977 | 0.976 | 0.984 | 0.976 |
| 1030 | 0.981 | 0.980 | 0.986 | 0.981 |
| 1040 | 0.979 | 0.978 | 0.984 | 0.979 |
| 1050 | 0.980 | 0.979 | 0.986 | 0.980 |
| 1060 | 0.977 | 0.976 | 0.982 | 0.976 |
| 1070 | 0.982 | 0.981 | 0.987 | 0.981 |
| 1080 | 0.978 | 0.977 | 0.985 | 0.977 |
| 1090 | 0.980 | 0.979 | 0.985 | 0.979 |
| 1100 | 0.981 | 0.980 | 0.987 | 0.981 |
| 1110 | 0.977 | 0.976 | 0.983 | 0.977 |
| 1120 | 0.979 | 0.978 | 0.985 | 0.979 |
| 1130 | 0.982 | 0.981 | 0.986 | 0.981 |
| 1140 | 0.982 | 0.982 | 0.987 | 0.982 |
| 1150 | 0.978 | 0.977 | 0.984 | 0.977 |
| 1160 | 0.978 | 0.978 | 0.984 | 0.978 |
| 1170 | 0.977 | 0.976 | 0.984 | 0.976 |
| 1180 | 0.980 | 0.979 | 0.985 | 0.979 |
| 1190 | 0.981 | 0.980 | 0.987 | 0.981 |
| 1200 | 0.979 | 0.978 | 0.985 | 0.978 |
| 1210 | 0.980 | 0.979 | 0.985 | 0.980 |
| 1220 | 0.982 | 0.981 | 0.987 | 0.981 |
| 1230 | 0.978 | 0.978 | 0.984 | 0.978 |
| 1240 | 0.978 | 0.978 | 0.985 | 0.978 |

|      |       |       |       |       |
|------|-------|-------|-------|-------|
| 1250 | 0.983 | 0.983 | 0.988 | 0.983 |
| 1260 | 0.980 | 0.979 | 0.986 | 0.979 |
| 1270 | 0.977 | 0.976 | 0.984 | 0.976 |
| 1280 | 0.981 | 0.980 | 0.986 | 0.981 |
| 1290 | 0.976 | 0.976 | 0.983 | 0.976 |
| 1300 | 0.978 | 0.977 | 0.982 | 0.977 |
| 1310 | 0.980 | 0.979 | 0.984 | 0.979 |
| 1320 | 0.980 | 0.979 | 0.986 | 0.979 |
| 1330 | 0.978 | 0.978 | 0.984 | 0.978 |
| 1340 | 0.979 | 0.978 | 0.983 | 0.978 |
| 1350 | 0.977 | 0.976 | 0.984 | 0.976 |
| 1360 | 0.976 | 0.976 | 0.983 | 0.976 |
| 1370 | 0.976 | 0.976 | 0.983 | 0.976 |
| 1380 | 0.980 | 0.979 | 0.983 | 0.980 |
| 1390 | 0.979 | 0.978 | 0.985 | 0.979 |
| 1400 | 0.978 | 0.978 | 0.984 | 0.978 |
| 1410 | 0.981 | 0.980 | 0.986 | 0.981 |
| 1420 | 0.980 | 0.980 | 0.987 | 0.980 |
| 1430 | 0.978 | 0.978 | 0.984 | 0.978 |
| 1440 | 0.977 | 0.976 | 0.983 | 0.976 |
| 1450 | 0.980 | 0.979 | 0.984 | 0.979 |
| 1460 | 0.979 | 0.978 | 0.985 | 0.979 |
| 1470 | 0.981 | 0.980 | 0.986 | 0.981 |
| 1480 | 0.978 | 0.977 | 0.984 | 0.977 |
| 1490 | 0.983 | 0.983 | 0.988 | 0.983 |
| 1500 | 0.978 | 0.977 | 0.984 | 0.977 |
| 1510 | 0.979 | 0.978 | 0.986 | 0.979 |
| 1520 | 0.980 | 0.979 | 0.985 | 0.980 |
| 1530 | 0.984 | 0.983 | 0.988 | 0.984 |
| 1540 | 0.981 | 0.980 | 0.987 | 0.981 |
| 1550 | 0.978 | 0.978 | 0.984 | 0.978 |
| 1560 | 0.982 | 0.981 | 0.987 | 0.981 |
| 1570 | 0.978 | 0.978 | 0.985 | 0.978 |
| 1580 | 0.978 | 0.977 | 0.984 | 0.977 |
| 1590 | 0.980 | 0.980 | 0.986 | 0.980 |
| 1600 | 0.976 | 0.975 | 0.982 | 0.975 |
| 1610 | 0.982 | 0.981 | 0.987 | 0.982 |
| 1620 | 0.978 | 0.978 | 0.983 | 0.978 |
| 1630 | 0.978 | 0.978 | 0.986 | 0.978 |
| 1640 | 0.980 | 0.980 | 0.986 | 0.980 |
| 1650 | 0.980 | 0.980 | 0.983 | 0.980 |
| 1660 | 0.980 | 0.979 | 0.984 | 0.979 |
| 1670 | 0.982 | 0.981 | 0.987 | 0.982 |

|      |       |       |       |       |
|------|-------|-------|-------|-------|
| 1680 | 0.977 | 0.976 | 0.983 | 0.977 |
| 1690 | 0.982 | 0.982 | 0.986 | 0.982 |
| 1700 | 0.979 | 0.978 | 0.985 | 0.979 |
| 1710 | 0.982 | 0.981 | 0.987 | 0.981 |
| 1720 | 0.979 | 0.978 | 0.986 | 0.979 |
| 1730 | 0.980 | 0.980 | 0.985 | 0.980 |
| 1740 | 0.981 | 0.980 | 0.987 | 0.981 |
| 1750 | 0.979 | 0.978 | 0.985 | 0.979 |
| 1760 | 0.982 | 0.982 | 0.988 | 0.982 |
| 1770 | 0.980 | 0.979 | 0.985 | 0.980 |
| 1780 | 0.982 | 0.981 | 0.988 | 0.981 |
| 1790 | 0.979 | 0.978 | 0.984 | 0.979 |
| 1800 | 0.984 | 0.984 | 0.988 | 0.984 |
| 1810 | 0.980 | 0.979 | 0.986 | 0.979 |
| 1820 | 0.981 | 0.980 | 0.988 | 0.981 |
| 1830 | 0.980 | 0.980 | 0.986 | 0.980 |
| 1840 | 0.980 | 0.980 | 0.987 | 0.980 |
| 1850 | 0.983 | 0.983 | 0.987 | 0.983 |
| 1860 | 0.982 | 0.981 | 0.988 | 0.981 |
| 1870 | 0.982 | 0.981 | 0.986 | 0.981 |
| 1880 | 0.982 | 0.981 | 0.987 | 0.982 |
| 1890 | 0.984 | 0.983 | 0.988 | 0.984 |
| 1900 | 0.982 | 0.982 | 0.987 | 0.982 |
| 1910 | 0.976 | 0.976 | 0.983 | 0.976 |
| 1920 | 0.982 | 0.981 | 0.988 | 0.981 |
| 1930 | 0.983 | 0.983 | 0.989 | 0.983 |
| 1940 | 0.982 | 0.982 | 0.988 | 0.982 |
| 1950 | 0.980 | 0.979 | 0.983 | 0.980 |
| 1960 | 0.980 | 0.980 | 0.986 | 0.980 |
| 1970 | 0.984 | 0.984 | 0.989 | 0.984 |
| 1980 | 0.981 | 0.980 | 0.986 | 0.981 |
| 1990 | 0.981 | 0.980 | 0.985 | 0.981 |
| 2000 | 0.982 | 0.981 | 0.987 | 0.981 |
| 2010 | 0.980 | 0.979 | 0.986 | 0.979 |
| 2020 | 0.981 | 0.980 | 0.988 | 0.981 |
| 2030 | 0.982 | 0.982 | 0.986 | 0.982 |
| 2040 | 0.982 | 0.981 | 0.987 | 0.981 |
| 2050 | 0.981 | 0.980 | 0.986 | 0.981 |
| 2060 | 0.982 | 0.981 | 0.986 | 0.981 |
| 2070 | 0.986 | 0.985 | 0.990 | 0.986 |
| 2080 | 0.980 | 0.980 | 0.987 | 0.980 |
| 2090 | 0.982 | 0.981 | 0.987 | 0.981 |
| 2100 | 0.980 | 0.979 | 0.986 | 0.979 |

|      |       |       |       |       |
|------|-------|-------|-------|-------|
| 2110 | 0.983 | 0.983 | 0.989 | 0.983 |
| 2120 | 0.978 | 0.978 | 0.985 | 0.978 |
| 2130 | 0.982 | 0.982 | 0.988 | 0.982 |
| 2140 | 0.982 | 0.982 | 0.988 | 0.982 |
| 2150 | 0.984 | 0.984 | 0.989 | 0.984 |
| 2160 | 0.983 | 0.983 | 0.987 | 0.983 |
| 2170 | 0.980 | 0.979 | 0.985 | 0.979 |
| 2180 | 0.981 | 0.980 | 0.987 | 0.981 |
| 2190 | 0.981 | 0.980 | 0.986 | 0.981 |
| 2200 | 0.984 | 0.983 | 0.987 | 0.984 |
| 2210 | 0.980 | 0.980 | 0.987 | 0.980 |
| 2220 | 0.980 | 0.979 | 0.985 | 0.979 |
| 2230 | 0.978 | 0.977 | 0.984 | 0.977 |
| 2240 | 0.980 | 0.979 | 0.986 | 0.979 |
| 2250 | 0.982 | 0.981 | 0.987 | 0.981 |
| 2260 | 0.984 | 0.983 | 0.988 | 0.984 |
| 2270 | 0.981 | 0.980 | 0.988 | 0.981 |
| 2280 | 0.982 | 0.982 | 0.987 | 0.982 |
| 2290 | 0.983 | 0.983 | 0.988 | 0.983 |
| 2300 | 0.982 | 0.982 | 0.988 | 0.982 |
| 2310 | 0.980 | 0.980 | 0.986 | 0.980 |
| 2320 | 0.982 | 0.981 | 0.988 | 0.981 |
| 2330 | 0.982 | 0.981 | 0.987 | 0.982 |
| 2340 | 0.979 | 0.978 | 0.986 | 0.979 |
| 2350 | 0.981 | 0.980 | 0.986 | 0.981 |
| 2360 | 0.980 | 0.979 | 0.986 | 0.979 |
| 2370 | 0.980 | 0.980 | 0.987 | 0.980 |
| 2380 | 0.983 | 0.983 | 0.987 | 0.983 |
| 2390 | 0.982 | 0.981 | 0.987 | 0.981 |
| 2400 | 0.983 | 0.983 | 0.988 | 0.983 |
| 2410 | 0.981 | 0.980 | 0.986 | 0.981 |
| 2420 | 0.979 | 0.978 | 0.986 | 0.979 |
| 2430 | 0.979 | 0.978 | 0.987 | 0.979 |
| 2440 | 0.984 | 0.983 | 0.989 | 0.983 |
| 2450 | 0.981 | 0.980 | 0.986 | 0.981 |
| 2460 | 0.984 | 0.983 | 0.988 | 0.984 |
| 2470 | 0.981 | 0.980 | 0.986 | 0.981 |
| 2480 | 0.980 | 0.980 | 0.986 | 0.980 |
| 2490 | 0.981 | 0.980 | 0.987 | 0.981 |
| 2500 | 0.980 | 0.980 | 0.985 | 0.980 |
| 2510 | 0.982 | 0.981 | 0.986 | 0.981 |
| 2520 | 0.980 | 0.980 | 0.986 | 0.980 |
| 2530 | 0.980 | 0.979 | 0.986 | 0.979 |

|      |       |       |       |       |
|------|-------|-------|-------|-------|
| 2540 | 0.982 | 0.982 | 0.986 | 0.982 |
| 2550 | 0.983 | 0.983 | 0.988 | 0.983 |
| 2560 | 0.980 | 0.979 | 0.985 | 0.979 |
| 2570 | 0.980 | 0.980 | 0.985 | 0.980 |
| 2580 | 0.980 | 0.979 | 0.986 | 0.979 |
| 2590 | 0.984 | 0.983 | 0.988 | 0.984 |
| 2600 | 0.981 | 0.980 | 0.987 | 0.981 |
| 2610 | 0.984 | 0.983 | 0.989 | 0.984 |
| 2620 | 0.980 | 0.979 | 0.986 | 0.979 |
| 2630 | 0.981 | 0.980 | 0.986 | 0.981 |
| 2640 | 0.985 | 0.985 | 0.989 | 0.985 |
| 2650 | 0.983 | 0.983 | 0.988 | 0.983 |
| 2660 | 0.981 | 0.980 | 0.985 | 0.981 |
| 2670 | 0.978 | 0.978 | 0.984 | 0.978 |
| 2680 | 0.982 | 0.981 | 0.987 | 0.982 |
| 2690 | 0.981 | 0.980 | 0.986 | 0.981 |
| 2700 | 0.982 | 0.981 | 0.987 | 0.982 |
| 2710 | 0.984 | 0.984 | 0.990 | 0.984 |
| 2720 | 0.981 | 0.980 | 0.988 | 0.981 |
| 2730 | 0.982 | 0.981 | 0.988 | 0.982 |
| 2740 | 0.984 | 0.984 | 0.989 | 0.984 |
| 2750 | 0.982 | 0.981 | 0.987 | 0.982 |
| 2760 | 0.981 | 0.980 | 0.986 | 0.981 |
| 2770 | 0.982 | 0.981 | 0.987 | 0.981 |
| 2780 | 0.984 | 0.983 | 0.990 | 0.984 |
| 2790 | 0.980 | 0.980 | 0.988 | 0.980 |
| 2800 | 0.980 | 0.980 | 0.984 | 0.980 |
| 2810 | 0.980 | 0.980 | 0.987 | 0.980 |
| 2820 | 0.978 | 0.977 | 0.985 | 0.977 |
| 2830 | 0.981 | 0.980 | 0.987 | 0.981 |
| 2840 | 0.981 | 0.980 | 0.986 | 0.981 |
| 2850 | 0.985 | 0.985 | 0.990 | 0.985 |
| 2860 | 0.978 | 0.977 | 0.984 | 0.977 |
| 2870 | 0.980 | 0.979 | 0.986 | 0.980 |
| 2880 | 0.978 | 0.978 | 0.985 | 0.978 |
| 2890 | 0.982 | 0.982 | 0.988 | 0.982 |
| 2900 | 0.980 | 0.980 | 0.986 | 0.980 |
| 2910 | 0.978 | 0.977 | 0.984 | 0.977 |
| 2920 | 0.984 | 0.984 | 0.989 | 0.984 |
| 2930 | 0.979 | 0.978 | 0.985 | 0.979 |
| 2940 | 0.981 | 0.980 | 0.987 | 0.981 |
| 2950 | 0.981 | 0.980 | 0.987 | 0.981 |
| 2960 | 0.979 | 0.978 | 0.985 | 0.979 |

|      |       |       |       |       |
|------|-------|-------|-------|-------|
| 2970 | 0.982 | 0.982 | 0.986 | 0.982 |
| 2980 | 0.980 | 0.980 | 0.986 | 0.980 |
| 2990 | 0.979 | 0.978 | 0.983 | 0.979 |
| 3000 | 0.981 | 0.980 | 0.985 | 0.981 |
| 3010 | 0.981 | 0.980 | 0.988 | 0.981 |
| 3020 | 0.978 | 0.977 | 0.985 | 0.977 |
| 3030 | 0.979 | 0.978 | 0.985 | 0.978 |
| 3040 | 0.980 | 0.979 | 0.985 | 0.979 |
| 3050 | 0.978 | 0.978 | 0.986 | 0.978 |
| 3060 | 0.983 | 0.983 | 0.987 | 0.983 |
| 3070 | 0.980 | 0.980 | 0.984 | 0.980 |
| 3080 | 0.982 | 0.982 | 0.986 | 0.982 |
| 3090 | 0.978 | 0.978 | 0.986 | 0.978 |
| 3100 | 0.982 | 0.982 | 0.987 | 0.982 |
| 3110 | 0.982 | 0.981 | 0.987 | 0.982 |
| 3120 | 0.980 | 0.979 | 0.986 | 0.979 |
| 3130 | 0.982 | 0.982 | 0.986 | 0.982 |
| 3140 | 0.981 | 0.980 | 0.987 | 0.981 |
| 3150 | 0.980 | 0.980 | 0.986 | 0.980 |
| 3160 | 0.978 | 0.977 | 0.984 | 0.977 |
| 3170 | 0.980 | 0.980 | 0.986 | 0.980 |
| 3180 | 0.983 | 0.983 | 0.987 | 0.983 |
| 3190 | 0.982 | 0.981 | 0.987 | 0.981 |
| 3200 | 0.980 | 0.980 | 0.986 | 0.980 |
| 3210 | 0.980 | 0.979 | 0.986 | 0.979 |
| 3220 | 0.982 | 0.981 | 0.986 | 0.982 |
| 3230 | 0.982 | 0.981 | 0.986 | 0.981 |
| 3240 | 0.981 | 0.980 | 0.986 | 0.981 |
| 3250 | 0.982 | 0.982 | 0.987 | 0.982 |
| 3260 | 0.980 | 0.980 | 0.987 | 0.980 |
| 3270 | 0.981 | 0.980 | 0.985 | 0.981 |
| 3280 | 0.984 | 0.984 | 0.989 | 0.984 |
| 3290 | 0.983 | 0.983 | 0.988 | 0.983 |
| 3300 | 0.982 | 0.981 | 0.987 | 0.982 |
| 3310 | 0.982 | 0.982 | 0.987 | 0.982 |
| 3320 | 0.981 | 0.980 | 0.986 | 0.981 |
| 3330 | 0.981 | 0.980 | 0.987 | 0.981 |
| 3340 | 0.982 | 0.982 | 0.988 | 0.982 |
| 3350 | 0.980 | 0.980 | 0.986 | 0.980 |
| 3360 | 0.980 | 0.980 | 0.985 | 0.980 |
| 3370 | 0.978 | 0.978 | 0.985 | 0.978 |
| 3380 | 0.982 | 0.981 | 0.988 | 0.981 |
| 3390 | 0.979 | 0.978 | 0.983 | 0.979 |



|      |       |       |       |       |
|------|-------|-------|-------|-------|
| 3400 | 0.981 | 0.980 | 0.986 | 0.981 |
| 3410 | 0.982 | 0.981 | 0.987 | 0.982 |
| 3420 | 0.980 | 0.979 | 0.986 | 0.979 |
| 3430 | 0.982 | 0.982 | 0.988 | 0.982 |
| 3440 | 0.985 | 0.985 | 0.989 | 0.985 |
| 3450 | 0.980 | 0.980 | 0.986 | 0.980 |
| 3460 | 0.981 | 0.980 | 0.989 | 0.981 |
| 3470 | 0.980 | 0.979 | 0.986 | 0.980 |
| 3480 | 0.981 | 0.980 | 0.987 | 0.981 |
| 3490 | 0.981 | 0.980 | 0.986 | 0.981 |
| 3500 | 0.981 | 0.980 | 0.985 | 0.981 |
| 3510 | 0.982 | 0.982 | 0.988 | 0.982 |
| 3520 | 0.980 | 0.979 | 0.985 | 0.979 |
| 3530 | 0.982 | 0.981 | 0.986 | 0.982 |
| 3540 | 0.980 | 0.980 | 0.984 | 0.980 |
| 3550 | 0.982 | 0.982 | 0.988 | 0.982 |
| 3560 | 0.980 | 0.980 | 0.986 | 0.980 |
| 3570 | 0.981 | 0.980 | 0.986 | 0.981 |
| 3580 | 0.979 | 0.978 | 0.984 | 0.979 |
| 3590 | 0.981 | 0.980 | 0.988 | 0.981 |
| 3600 | 0.980 | 0.979 | 0.986 | 0.979 |
| 3610 | 0.982 | 0.982 | 0.988 | 0.982 |
| 3620 | 0.983 | 0.983 | 0.988 | 0.983 |
| 3630 | 0.982 | 0.982 | 0.987 | 0.982 |
| 3640 | 0.983 | 0.983 | 0.988 | 0.983 |
| 3650 | 0.982 | 0.981 | 0.987 | 0.982 |
| 3660 | 0.985 | 0.985 | 0.987 | 0.985 |
| 3670 | 0.983 | 0.983 | 0.988 | 0.983 |
| 3680 | 0.982 | 0.982 | 0.986 | 0.982 |
| 3690 | 0.981 | 0.980 | 0.987 | 0.981 |
| 3700 | 0.980 | 0.980 | 0.987 | 0.980 |
| 3710 | 0.983 | 0.983 | 0.989 | 0.983 |
| 3720 | 0.980 | 0.979 | 0.986 | 0.979 |
| 3730 | 0.980 | 0.979 | 0.985 | 0.979 |
| 3740 | 0.983 | 0.983 | 0.988 | 0.983 |
| 3750 | 0.984 | 0.983 | 0.988 | 0.984 |
| 3760 | 0.982 | 0.981 | 0.988 | 0.981 |
| 3770 | 0.981 | 0.980 | 0.986 | 0.981 |
| 3780 | 0.980 | 0.979 | 0.985 | 0.979 |
| 3790 | 0.984 | 0.983 | 0.989 | 0.984 |
| 3800 | 0.982 | 0.982 | 0.987 | 0.982 |
| 3810 | 0.982 | 0.982 | 0.988 | 0.982 |
| 3820 | 0.982 | 0.982 | 0.988 | 0.982 |

|      |       |       |       |       |
|------|-------|-------|-------|-------|
| 3830 | 0.981 | 0.980 | 0.988 | 0.981 |
| 3840 | 0.981 | 0.980 | 0.986 | 0.981 |
| 3850 | 0.984 | 0.984 | 0.989 | 0.984 |
| 3860 | 0.982 | 0.981 | 0.986 | 0.981 |
| 3870 | 0.985 | 0.985 | 0.990 | 0.985 |
| 3880 | 0.982 | 0.982 | 0.989 | 0.982 |
| 3890 | 0.982 | 0.981 | 0.987 | 0.982 |
| 3900 | 0.980 | 0.980 | 0.986 | 0.980 |
| 3910 | 0.981 | 0.980 | 0.987 | 0.981 |
| 3920 | 0.982 | 0.982 | 0.987 | 0.982 |
| 3930 | 0.985 | 0.985 | 0.989 | 0.985 |
| 3940 | 0.981 | 0.980 | 0.987 | 0.981 |
| 3950 | 0.984 | 0.983 | 0.988 | 0.984 |
| 3960 | 0.981 | 0.980 | 0.988 | 0.981 |
| 3970 | 0.983 | 0.983 | 0.988 | 0.983 |
| 3980 | 0.980 | 0.979 | 0.984 | 0.979 |
| 3990 | 0.984 | 0.983 | 0.988 | 0.984 |
| 4000 | 0.979 | 0.978 | 0.986 | 0.978 |
| 4010 | 0.984 | 0.984 | 0.989 | 0.984 |
| 4020 | 0.982 | 0.982 | 0.988 | 0.982 |
| 4030 | 0.980 | 0.979 | 0.985 | 0.980 |
| 4040 | 0.982 | 0.982 | 0.986 | 0.982 |
| 4050 | 0.981 | 0.980 | 0.986 | 0.981 |
| 4060 | 0.982 | 0.982 | 0.987 | 0.982 |
| 4070 | 0.978 | 0.977 | 0.984 | 0.977 |
| 4080 | 0.985 | 0.985 | 0.989 | 0.985 |
| 4090 | 0.983 | 0.983 | 0.988 | 0.983 |
| 4100 | 0.982 | 0.982 | 0.988 | 0.982 |
| 4110 | 0.983 | 0.983 | 0.987 | 0.983 |
| 4120 | 0.982 | 0.982 | 0.986 | 0.982 |
| 4130 | 0.980 | 0.980 | 0.986 | 0.980 |
| 4140 | 0.980 | 0.980 | 0.985 | 0.980 |
| 4150 | 0.982 | 0.982 | 0.988 | 0.982 |
| 4160 | 0.982 | 0.981 | 0.987 | 0.982 |
| 4170 | 0.981 | 0.980 | 0.987 | 0.981 |
| 4180 | 0.980 | 0.979 | 0.986 | 0.979 |
| 4190 | 0.981 | 0.980 | 0.986 | 0.981 |
| 4200 | 0.984 | 0.984 | 0.988 | 0.984 |
| 4210 | 0.980 | 0.980 | 0.984 | 0.980 |
| 4220 | 0.980 | 0.980 | 0.986 | 0.980 |
| 4230 | 0.982 | 0.981 | 0.987 | 0.982 |
| 4240 | 0.983 | 0.983 | 0.988 | 0.983 |
| 4250 | 0.984 | 0.984 | 0.988 | 0.984 |

|      |       |       |       |       |
|------|-------|-------|-------|-------|
| 4260 | 0.982 | 0.982 | 0.988 | 0.982 |
| 4270 | 0.981 | 0.980 | 0.985 | 0.981 |
| 4280 | 0.981 | 0.980 | 0.986 | 0.981 |
| 4290 | 0.982 | 0.982 | 0.986 | 0.982 |
| 4300 | 0.982 | 0.981 | 0.986 | 0.982 |
| 4310 | 0.985 | 0.985 | 0.989 | 0.985 |
| 4320 | 0.983 | 0.983 | 0.986 | 0.983 |
| 4330 | 0.980 | 0.979 | 0.986 | 0.979 |
| 4340 | 0.985 | 0.985 | 0.989 | 0.985 |
| 4350 | 0.981 | 0.980 | 0.987 | 0.981 |
| 4360 | 0.982 | 0.982 | 0.988 | 0.982 |
| 4370 | 0.982 | 0.982 | 0.988 | 0.982 |
| 4380 | 0.980 | 0.980 | 0.986 | 0.980 |
| 4390 | 0.983 | 0.983 | 0.988 | 0.983 |
| 4400 | 0.984 | 0.983 | 0.988 | 0.984 |
| 4410 | 0.982 | 0.982 | 0.987 | 0.982 |
| 4420 | 0.980 | 0.980 | 0.986 | 0.980 |
| 4430 | 0.984 | 0.983 | 0.988 | 0.983 |
| 4440 | 0.983 | 0.983 | 0.987 | 0.983 |
| 4450 | 0.984 | 0.983 | 0.989 | 0.984 |
| 4460 | 0.982 | 0.982 | 0.987 | 0.982 |
| 4470 | 0.981 | 0.980 | 0.987 | 0.981 |
| 4480 | 0.980 | 0.980 | 0.986 | 0.980 |
| 4490 | 0.982 | 0.981 | 0.985 | 0.982 |
| 4500 | 0.982 | 0.981 | 0.986 | 0.982 |
| 4510 | 0.980 | 0.980 | 0.984 | 0.980 |
| 4520 | 0.987 | 0.987 | 0.992 | 0.987 |
| 4530 | 0.982 | 0.982 | 0.986 | 0.982 |
| 4540 | 0.982 | 0.981 | 0.986 | 0.981 |
| 4550 | 0.984 | 0.983 | 0.988 | 0.984 |
| 4560 | 0.984 | 0.984 | 0.990 | 0.984 |
| 4570 | 0.980 | 0.979 | 0.985 | 0.979 |
| 4580 | 0.983 | 0.983 | 0.989 | 0.983 |
| 4590 | 0.978 | 0.978 | 0.983 | 0.978 |
| 4600 | 0.981 | 0.980 | 0.986 | 0.981 |
| 4610 | 0.984 | 0.983 | 0.988 | 0.984 |
| 4620 | 0.982 | 0.981 | 0.987 | 0.982 |
| 4630 | 0.982 | 0.982 | 0.986 | 0.982 |
| 4640 | 0.982 | 0.982 | 0.987 | 0.982 |
| 4650 | 0.982 | 0.982 | 0.987 | 0.982 |
| 4660 | 0.979 | 0.978 | 0.985 | 0.979 |
| 4670 | 0.985 | 0.985 | 0.989 | 0.985 |
| 4680 | 0.982 | 0.981 | 0.987 | 0.981 |

|      |       |       |       |       |
|------|-------|-------|-------|-------|
| 4690 | 0.979 | 0.978 | 0.984 | 0.979 |
| 4700 | 0.982 | 0.982 | 0.987 | 0.982 |
| 4710 | 0.983 | 0.983 | 0.989 | 0.983 |
| 4720 | 0.983 | 0.983 | 0.988 | 0.983 |
| 4730 | 0.979 | 0.978 | 0.985 | 0.979 |
| 4740 | 0.982 | 0.982 | 0.986 | 0.982 |
| 4750 | 0.983 | 0.983 | 0.988 | 0.983 |
| 4760 | 0.982 | 0.982 | 0.987 | 0.982 |
| 4770 | 0.984 | 0.984 | 0.988 | 0.984 |
| 4780 | 0.983 | 0.983 | 0.987 | 0.983 |
| 4790 | 0.984 | 0.984 | 0.989 | 0.984 |
| 4800 | 0.980 | 0.979 | 0.985 | 0.979 |
| 4810 | 0.983 | 0.983 | 0.988 | 0.983 |
| 4820 | 0.980 | 0.980 | 0.985 | 0.980 |
| 4830 | 0.980 | 0.979 | 0.984 | 0.979 |
| 4840 | 0.980 | 0.980 | 0.987 | 0.980 |
| 4850 | 0.984 | 0.983 | 0.987 | 0.984 |
| 4860 | 0.983 | 0.983 | 0.988 | 0.983 |
| 4870 | 0.980 | 0.979 | 0.984 | 0.980 |
| 4880 | 0.978 | 0.978 | 0.984 | 0.978 |
| 4890 | 0.985 | 0.985 | 0.990 | 0.985 |
| 4900 | 0.980 | 0.980 | 0.986 | 0.980 |
| 4910 | 0.982 | 0.982 | 0.988 | 0.982 |
| 4920 | 0.983 | 0.983 | 0.988 | 0.983 |
| 4930 | 0.982 | 0.981 | 0.988 | 0.981 |
| 4940 | 0.980 | 0.980 | 0.986 | 0.980 |
| 4950 | 0.986 | 0.985 | 0.990 | 0.986 |
| 4960 | 0.982 | 0.981 | 0.987 | 0.981 |
| 4970 | 0.981 | 0.980 | 0.987 | 0.981 |
| 4980 | 0.982 | 0.981 | 0.986 | 0.982 |
| 4990 | 0.981 | 0.980 | 0.986 | 0.981 |
| 5000 | 0.980 | 0.980 | 0.985 | 0.980 |
| 5010 | 0.984 | 0.983 | 0.988 | 0.984 |
| 5020 | 0.982 | 0.982 | 0.988 | 0.982 |
| 5030 | 0.984 | 0.984 | 0.989 | 0.984 |
| 5040 | 0.980 | 0.980 | 0.984 | 0.980 |
| 5050 | 0.980 | 0.979 | 0.985 | 0.979 |
| 5060 | 0.981 | 0.980 | 0.985 | 0.981 |
| 5070 | 0.980 | 0.980 | 0.987 | 0.980 |
| 5080 | 0.982 | 0.982 | 0.988 | 0.982 |
| 5090 | 0.981 | 0.980 | 0.985 | 0.981 |
| 5100 | 0.984 | 0.984 | 0.989 | 0.984 |
| 5110 | 0.981 | 0.980 | 0.986 | 0.981 |

|      |       |       |       |       |
|------|-------|-------|-------|-------|
| 5120 | 0.983 | 0.983 | 0.988 | 0.983 |
| 5130 | 0.982 | 0.981 | 0.987 | 0.982 |
| 5140 | 0.981 | 0.980 | 0.987 | 0.981 |
| 5150 | 0.980 | 0.980 | 0.986 | 0.980 |
| 5160 | 0.985 | 0.985 | 0.990 | 0.985 |
| 5170 | 0.981 | 0.980 | 0.987 | 0.981 |
| 5180 | 0.982 | 0.982 | 0.987 | 0.982 |
| 5190 | 0.981 | 0.980 | 0.986 | 0.981 |
| 5200 | 0.984 | 0.984 | 0.989 | 0.984 |
| 5210 | 0.984 | 0.983 | 0.987 | 0.984 |
| 5220 | 0.982 | 0.981 | 0.987 | 0.982 |
| 5230 | 0.980 | 0.980 | 0.987 | 0.980 |
| 5240 | 0.983 | 0.983 | 0.987 | 0.983 |
| 5250 | 0.982 | 0.982 | 0.988 | 0.982 |
| 5260 | 0.982 | 0.982 | 0.986 | 0.982 |
| 5270 | 0.982 | 0.982 | 0.988 | 0.982 |
| 5280 | 0.982 | 0.981 | 0.987 | 0.982 |
| 5290 | 0.982 | 0.981 | 0.987 | 0.982 |
| 5300 | 0.982 | 0.981 | 0.987 | 0.982 |
| 5310 | 0.984 | 0.984 | 0.989 | 0.984 |
| 5320 | 0.982 | 0.981 | 0.987 | 0.981 |
| 5330 | 0.982 | 0.981 | 0.985 | 0.981 |
| 5340 | 0.982 | 0.981 | 0.987 | 0.982 |
| 5350 | 0.986 | 0.985 | 0.990 | 0.986 |
| 5360 | 0.981 | 0.980 | 0.985 | 0.981 |
| 5370 | 0.982 | 0.981 | 0.985 | 0.982 |
| 5380 | 0.982 | 0.981 | 0.986 | 0.982 |
| 5390 | 0.983 | 0.983 | 0.988 | 0.983 |
| 5400 | 0.984 | 0.984 | 0.989 | 0.984 |
| 5410 | 0.982 | 0.982 | 0.987 | 0.982 |
| 5420 | 0.982 | 0.982 | 0.987 | 0.982 |
| 5430 | 0.978 | 0.978 | 0.983 | 0.978 |
| 5440 | 0.983 | 0.983 | 0.987 | 0.983 |
| 5450 | 0.981 | 0.980 | 0.987 | 0.981 |
| 5460 | 0.979 | 0.978 | 0.985 | 0.979 |
| 5470 | 0.980 | 0.980 | 0.985 | 0.980 |
| 5480 | 0.978 | 0.977 | 0.983 | 0.977 |
| 5490 | 0.982 | 0.982 | 0.986 | 0.982 |
| 5500 | 0.983 | 0.983 | 0.987 | 0.983 |
| 5510 | 0.983 | 0.983 | 0.988 | 0.983 |
| 5520 | 0.983 | 0.983 | 0.988 | 0.983 |
| 5530 | 0.982 | 0.982 | 0.987 | 0.982 |
| 5540 | 0.982 | 0.981 | 0.987 | 0.982 |

|      |       |       |       |       |
|------|-------|-------|-------|-------|
| 5550 | 0.982 | 0.982 | 0.987 | 0.982 |
| 5560 | 0.982 | 0.981 | 0.986 | 0.982 |
| 5570 | 0.982 | 0.982 | 0.986 | 0.982 |
| 5580 | 0.983 | 0.983 | 0.987 | 0.983 |
| 5590 | 0.979 | 0.978 | 0.986 | 0.979 |
| 5600 | 0.979 | 0.978 | 0.984 | 0.979 |
| 5610 | 0.983 | 0.983 | 0.989 | 0.983 |
| 5620 | 0.983 | 0.983 | 0.988 | 0.983 |
| 5630 | 0.982 | 0.981 | 0.987 | 0.982 |
| 5640 | 0.978 | 0.978 | 0.984 | 0.978 |
| 5650 | 0.981 | 0.980 | 0.986 | 0.981 |
| 5660 | 0.982 | 0.982 | 0.987 | 0.982 |
| 5670 | 0.979 | 0.978 | 0.985 | 0.979 |
| 5680 | 0.983 | 0.983 | 0.988 | 0.983 |
| 5690 | 0.982 | 0.982 | 0.987 | 0.982 |
| 5700 | 0.982 | 0.981 | 0.988 | 0.982 |
| 5710 | 0.980 | 0.980 | 0.985 | 0.980 |
| 5720 | 0.979 | 0.978 | 0.985 | 0.979 |
| 5730 | 0.984 | 0.984 | 0.989 | 0.984 |
| 5740 | 0.983 | 0.983 | 0.988 | 0.983 |
| 5750 | 0.985 | 0.985 | 0.989 | 0.985 |
| 5760 | 0.980 | 0.980 | 0.986 | 0.980 |
| 5770 | 0.983 | 0.983 | 0.988 | 0.983 |
| 5780 | 0.983 | 0.983 | 0.988 | 0.983 |
| 5790 | 0.981 | 0.980 | 0.986 | 0.981 |
| 5800 | 0.982 | 0.982 | 0.988 | 0.982 |
| 5810 | 0.982 | 0.982 | 0.987 | 0.982 |
| 5820 | 0.984 | 0.983 | 0.988 | 0.984 |
| 5830 | 0.984 | 0.983 | 0.987 | 0.984 |
| 5840 | 0.984 | 0.983 | 0.988 | 0.984 |
| 5850 | 0.979 | 0.978 | 0.985 | 0.979 |
| 5860 | 0.984 | 0.984 | 0.989 | 0.984 |
| 5870 | 0.983 | 0.983 | 0.988 | 0.983 |
| 5880 | 0.978 | 0.978 | 0.983 | 0.978 |
| 5890 | 0.983 | 0.983 | 0.987 | 0.983 |
| 5900 | 0.979 | 0.978 | 0.985 | 0.979 |
| 5910 | 0.981 | 0.980 | 0.985 | 0.981 |
| 5920 | 0.983 | 0.983 | 0.986 | 0.983 |
| 5930 | 0.980 | 0.980 | 0.985 | 0.980 |
| 5940 | 0.982 | 0.981 | 0.986 | 0.981 |
| 5950 | 0.980 | 0.980 | 0.985 | 0.980 |
| 5960 | 0.980 | 0.980 | 0.986 | 0.980 |
| 5970 | 0.983 | 0.983 | 0.988 | 0.983 |

|      |       |       |       |       |
|------|-------|-------|-------|-------|
| 5980 | 0.980 | 0.980 | 0.986 | 0.980 |
| 5990 | 0.984 | 0.983 | 0.988 | 0.983 |
| 6000 | 0.982 | 0.982 | 0.986 | 0.982 |
| 6010 | 0.984 | 0.984 | 0.989 | 0.984 |
| 6020 | 0.984 | 0.984 | 0.989 | 0.984 |
| 6030 | 0.983 | 0.983 | 0.988 | 0.983 |
| 6040 | 0.980 | 0.980 | 0.986 | 0.980 |
| 6050 | 0.979 | 0.978 | 0.985 | 0.979 |
| 6060 | 0.982 | 0.982 | 0.986 | 0.982 |
| 6070 | 0.980 | 0.979 | 0.986 | 0.979 |
| 6080 | 0.980 | 0.980 | 0.985 | 0.980 |
| 6090 | 0.982 | 0.982 | 0.988 | 0.982 |
| 6100 | 0.985 | 0.985 | 0.990 | 0.985 |
| 6110 | 0.982 | 0.982 | 0.987 | 0.982 |
| 6120 | 0.980 | 0.980 | 0.985 | 0.980 |
| 6130 | 0.982 | 0.981 | 0.986 | 0.982 |
| 6140 | 0.981 | 0.980 | 0.986 | 0.981 |
| 6150 | 0.981 | 0.980 | 0.985 | 0.981 |
| 6160 | 0.982 | 0.982 | 0.987 | 0.982 |
| 6170 | 0.981 | 0.980 | 0.985 | 0.981 |
| 6180 | 0.981 | 0.980 | 0.987 | 0.981 |
| 6190 | 0.984 | 0.983 | 0.988 | 0.984 |
| 6200 | 0.981 | 0.980 | 0.987 | 0.981 |
| 6210 | 0.982 | 0.982 | 0.986 | 0.982 |
| 6220 | 0.980 | 0.979 | 0.984 | 0.980 |
| 6230 | 0.984 | 0.983 | 0.988 | 0.984 |
| 6240 | 0.982 | 0.982 | 0.987 | 0.982 |
| 6250 | 0.980 | 0.980 | 0.985 | 0.980 |
| 6260 | 0.980 | 0.980 | 0.984 | 0.980 |
| 6270 | 0.980 | 0.980 | 0.984 | 0.980 |
| 6280 | 0.980 | 0.979 | 0.985 | 0.980 |
| 6290 | 0.982 | 0.981 | 0.987 | 0.982 |
| 6300 | 0.984 | 0.984 | 0.989 | 0.984 |
| 6310 | 0.982 | 0.981 | 0.987 | 0.981 |
| 6320 | 0.980 | 0.980 | 0.985 | 0.980 |
| 6330 | 0.984 | 0.983 | 0.987 | 0.984 |
| 6340 | 0.982 | 0.982 | 0.988 | 0.982 |
| 6350 | 0.982 | 0.982 | 0.987 | 0.982 |
| 6360 | 0.981 | 0.980 | 0.986 | 0.981 |
| 6370 | 0.982 | 0.981 | 0.986 | 0.981 |
| 6380 | 0.980 | 0.980 | 0.986 | 0.980 |
| 6390 | 0.982 | 0.981 | 0.986 | 0.982 |
| 6400 | 0.984 | 0.983 | 0.989 | 0.984 |

|      |       |       |       |       |
|------|-------|-------|-------|-------|
| 6410 | 0.982 | 0.982 | 0.986 | 0.982 |
| 6420 | 0.981 | 0.980 | 0.986 | 0.981 |
| 6430 | 0.980 | 0.980 | 0.987 | 0.980 |
| 6440 | 0.982 | 0.981 | 0.987 | 0.982 |
| 6450 | 0.982 | 0.981 | 0.987 | 0.981 |
| 6460 | 0.980 | 0.979 | 0.985 | 0.980 |
| 6470 | 0.980 | 0.979 | 0.985 | 0.980 |
| 6480 | 0.982 | 0.982 | 0.989 | 0.982 |
| 6490 | 0.984 | 0.983 | 0.988 | 0.984 |
| 6500 | 0.983 | 0.983 | 0.987 | 0.983 |
| 6510 | 0.982 | 0.982 | 0.988 | 0.982 |
| 6520 | 0.978 | 0.977 | 0.984 | 0.977 |
| 6530 | 0.980 | 0.979 | 0.985 | 0.979 |
| 6540 | 0.985 | 0.985 | 0.989 | 0.985 |
| 6550 | 0.984 | 0.983 | 0.988 | 0.984 |
| 6560 | 0.984 | 0.984 | 0.989 | 0.984 |
| 6570 | 0.982 | 0.981 | 0.987 | 0.982 |
| 6580 | 0.982 | 0.982 | 0.988 | 0.982 |
| 6590 | 0.980 | 0.980 | 0.986 | 0.980 |
| 6600 | 0.984 | 0.983 | 0.988 | 0.984 |
| 6610 | 0.982 | 0.982 | 0.988 | 0.982 |
| 6620 | 0.982 | 0.982 | 0.988 | 0.982 |
| 6630 | 0.982 | 0.981 | 0.987 | 0.982 |
| 6640 | 0.985 | 0.985 | 0.990 | 0.985 |
| 6650 | 0.981 | 0.980 | 0.985 | 0.981 |
| 6660 | 0.981 | 0.980 | 0.986 | 0.981 |
| 6670 | 0.982 | 0.981 | 0.987 | 0.982 |
| 6680 | 0.982 | 0.982 | 0.987 | 0.982 |
| 6690 | 0.985 | 0.985 | 0.989 | 0.985 |
| 6700 | 0.985 | 0.985 | 0.989 | 0.985 |
| 6710 | 0.984 | 0.983 | 0.988 | 0.984 |
| 6720 | 0.982 | 0.982 | 0.987 | 0.982 |
| 6730 | 0.982 | 0.982 | 0.987 | 0.982 |
| 6740 | 0.982 | 0.981 | 0.985 | 0.982 |
| 6750 | 0.984 | 0.983 | 0.988 | 0.984 |
| 6760 | 0.983 | 0.983 | 0.986 | 0.983 |
| 6770 | 0.984 | 0.984 | 0.989 | 0.984 |
| 6780 | 0.984 | 0.984 | 0.988 | 0.984 |
| 6790 | 0.983 | 0.983 | 0.988 | 0.983 |
| 6800 | 0.982 | 0.981 | 0.987 | 0.981 |
| 6810 | 0.983 | 0.983 | 0.987 | 0.983 |
| 6820 | 0.980 | 0.980 | 0.985 | 0.980 |
| 6830 | 0.983 | 0.983 | 0.988 | 0.983 |



|      |       |       |       |       |
|------|-------|-------|-------|-------|
| 6840 | 0.983 | 0.983 | 0.987 | 0.983 |
| 6850 | 0.982 | 0.982 | 0.988 | 0.982 |
| 6860 | 0.984 | 0.983 | 0.988 | 0.984 |
| 6870 | 0.982 | 0.982 | 0.987 | 0.982 |
| 6880 | 0.982 | 0.981 | 0.987 | 0.982 |
| 6890 | 0.980 | 0.979 | 0.986 | 0.980 |
| 6900 | 0.984 | 0.983 | 0.988 | 0.984 |
| 6910 | 0.984 | 0.983 | 0.989 | 0.984 |
| 6920 | 0.982 | 0.981 | 0.988 | 0.982 |
| 6930 | 0.982 | 0.981 | 0.987 | 0.982 |
| 6940 | 0.983 | 0.983 | 0.987 | 0.983 |
| 6950 | 0.983 | 0.983 | 0.988 | 0.983 |
| 6960 | 0.981 | 0.980 | 0.987 | 0.981 |
| 6970 | 0.982 | 0.981 | 0.986 | 0.982 |
| 6980 | 0.979 | 0.978 | 0.985 | 0.979 |
| 6990 | 0.982 | 0.982 | 0.987 | 0.982 |
| 7000 | 0.983 | 0.983 | 0.988 | 0.983 |
| 7010 | 0.984 | 0.983 | 0.987 | 0.984 |
| 7020 | 0.984 | 0.983 | 0.989 | 0.983 |
| 7030 | 0.982 | 0.981 | 0.985 | 0.982 |
| 7040 | 0.983 | 0.983 | 0.988 | 0.983 |
| 7050 | 0.983 | 0.983 | 0.988 | 0.983 |
| 7060 | 0.984 | 0.983 | 0.988 | 0.984 |
| 7070 | 0.983 | 0.983 | 0.988 | 0.983 |
| 7080 | 0.982 | 0.982 | 0.987 | 0.982 |
| 7090 | 0.982 | 0.982 | 0.986 | 0.982 |
| 7100 | 0.979 | 0.978 | 0.985 | 0.979 |
| 7110 | 0.982 | 0.981 | 0.988 | 0.982 |
| 7120 | 0.982 | 0.982 | 0.988 | 0.982 |
| 7130 | 0.982 | 0.981 | 0.986 | 0.982 |
| 7140 | 0.982 | 0.982 | 0.987 | 0.982 |
| 7150 | 0.983 | 0.983 | 0.987 | 0.983 |
| 7160 | 0.983 | 0.983 | 0.987 | 0.983 |
| 7170 | 0.981 | 0.980 | 0.986 | 0.981 |
| 7180 | 0.983 | 0.983 | 0.986 | 0.983 |
| 7190 | 0.980 | 0.979 | 0.986 | 0.979 |
| 7200 | 0.984 | 0.983 | 0.989 | 0.984 |
| 7210 | 0.982 | 0.981 | 0.987 | 0.982 |
| 7220 | 0.982 | 0.981 | 0.986 | 0.982 |
| 7230 | 0.982 | 0.981 | 0.986 | 0.981 |
| 7240 | 0.983 | 0.983 | 0.989 | 0.983 |
| 7250 | 0.984 | 0.983 | 0.988 | 0.984 |
| 7260 | 0.981 | 0.980 | 0.985 | 0.981 |

|      |       |       |       |       |
|------|-------|-------|-------|-------|
| 7270 | 0.979 | 0.978 | 0.983 | 0.979 |
| 7280 | 0.982 | 0.982 | 0.988 | 0.982 |
| 7290 | 0.983 | 0.983 | 0.987 | 0.983 |
| 7300 | 0.980 | 0.980 | 0.985 | 0.980 |
| 7310 | 0.984 | 0.984 | 0.988 | 0.984 |
| 7320 | 0.984 | 0.983 | 0.988 | 0.984 |
| 7330 | 0.982 | 0.982 | 0.988 | 0.982 |
| 7340 | 0.984 | 0.983 | 0.988 | 0.984 |
| 7350 | 0.981 | 0.980 | 0.987 | 0.981 |
| 7360 | 0.980 | 0.980 | 0.986 | 0.980 |
| 7370 | 0.984 | 0.984 | 0.988 | 0.984 |
| 7380 | 0.985 | 0.985 | 0.989 | 0.985 |
| 7390 | 0.978 | 0.977 | 0.984 | 0.977 |
| 7400 | 0.982 | 0.981 | 0.986 | 0.982 |
| 7410 | 0.982 | 0.982 | 0.987 | 0.982 |
| 7420 | 0.983 | 0.983 | 0.987 | 0.983 |
| 7430 | 0.981 | 0.980 | 0.984 | 0.981 |
| 7440 | 0.984 | 0.983 | 0.987 | 0.984 |
| 7450 | 0.980 | 0.979 | 0.985 | 0.980 |
| 7460 | 0.982 | 0.982 | 0.986 | 0.982 |
| 7470 | 0.982 | 0.981 | 0.986 | 0.982 |
| 7480 | 0.982 | 0.981 | 0.987 | 0.982 |
| 7490 | 0.984 | 0.984 | 0.988 | 0.984 |
| 7500 | 0.982 | 0.982 | 0.987 | 0.982 |
| 7510 | 0.982 | 0.982 | 0.987 | 0.982 |
| 7520 | 0.982 | 0.981 | 0.988 | 0.981 |
| 7530 | 0.981 | 0.980 | 0.987 | 0.981 |
| 7540 | 0.981 | 0.980 | 0.986 | 0.981 |
| 7550 | 0.982 | 0.982 | 0.988 | 0.982 |
| 7560 | 0.981 | 0.980 | 0.986 | 0.981 |
| 7570 | 0.982 | 0.982 | 0.987 | 0.982 |
| 7580 | 0.983 | 0.983 | 0.987 | 0.983 |
| 7590 | 0.984 | 0.984 | 0.988 | 0.984 |
| 7600 | 0.982 | 0.982 | 0.988 | 0.982 |
| 7610 | 0.985 | 0.985 | 0.989 | 0.985 |
| 7620 | 0.981 | 0.980 | 0.987 | 0.981 |
| 7630 | 0.986 | 0.985 | 0.989 | 0.986 |
| 7640 | 0.982 | 0.981 | 0.987 | 0.982 |
| 7650 | 0.980 | 0.979 | 0.987 | 0.979 |
| 7660 | 0.981 | 0.980 | 0.987 | 0.981 |
| 7670 | 0.982 | 0.982 | 0.988 | 0.982 |
| 7680 | 0.982 | 0.981 | 0.987 | 0.982 |
| 7690 | 0.983 | 0.983 | 0.987 | 0.983 |

|      |       |       |       |       |
|------|-------|-------|-------|-------|
| 7700 | 0.981 | 0.980 | 0.986 | 0.981 |
| 7710 | 0.983 | 0.983 | 0.988 | 0.983 |
| 7720 | 0.984 | 0.983 | 0.989 | 0.984 |
| 7730 | 0.978 | 0.978 | 0.984 | 0.978 |
| 7740 | 0.982 | 0.982 | 0.988 | 0.982 |
| 7750 | 0.984 | 0.984 | 0.989 | 0.984 |
| 7760 | 0.979 | 0.978 | 0.985 | 0.979 |
| 7770 | 0.981 | 0.980 | 0.986 | 0.981 |
| 7780 | 0.981 | 0.980 | 0.985 | 0.981 |
| 7790 | 0.983 | 0.983 | 0.988 | 0.983 |
| 7800 | 0.983 | 0.983 | 0.987 | 0.983 |
| 7810 | 0.983 | 0.983 | 0.988 | 0.983 |
| 7820 | 0.982 | 0.981 | 0.987 | 0.982 |
| 7830 | 0.983 | 0.983 | 0.988 | 0.983 |
| 7840 | 0.984 | 0.983 | 0.987 | 0.984 |
| 7850 | 0.982 | 0.981 | 0.987 | 0.982 |
| 7860 | 0.983 | 0.983 | 0.989 | 0.983 |
| 7870 | 0.984 | 0.983 | 0.988 | 0.984 |
| 7880 | 0.982 | 0.982 | 0.987 | 0.982 |
| 7890 | 0.981 | 0.980 | 0.986 | 0.981 |
| 7900 | 0.984 | 0.984 | 0.989 | 0.984 |
| 7910 | 0.982 | 0.982 | 0.988 | 0.982 |
| 7920 | 0.981 | 0.980 | 0.987 | 0.981 |
| 7930 | 0.981 | 0.980 | 0.986 | 0.981 |
| 7940 | 0.980 | 0.980 | 0.987 | 0.980 |
| 7950 | 0.982 | 0.982 | 0.987 | 0.982 |
| 7960 | 0.981 | 0.980 | 0.985 | 0.981 |
| 7970 | 0.981 | 0.980 | 0.987 | 0.981 |
| 7980 | 0.980 | 0.980 | 0.985 | 0.980 |
| 7990 | 0.980 | 0.980 | 0.987 | 0.980 |
| 8000 | 0.980 | 0.980 | 0.984 | 0.980 |
| 8010 | 0.983 | 0.983 | 0.987 | 0.983 |
| 8020 | 0.981 | 0.980 | 0.986 | 0.981 |
| 8030 | 0.980 | 0.980 | 0.985 | 0.980 |
| 8040 | 0.982 | 0.981 | 0.985 | 0.982 |
| 8050 | 0.984 | 0.984 | 0.988 | 0.984 |
| 8060 | 0.983 | 0.983 | 0.988 | 0.983 |
| 8070 | 0.982 | 0.982 | 0.987 | 0.982 |
| 8080 | 0.980 | 0.980 | 0.986 | 0.980 |
| 8090 | 0.982 | 0.982 | 0.987 | 0.982 |
| 8100 | 0.984 | 0.984 | 0.989 | 0.984 |
| 8110 | 0.982 | 0.982 | 0.987 | 0.982 |
| 8120 | 0.982 | 0.982 | 0.986 | 0.982 |

|      |       |       |       |       |
|------|-------|-------|-------|-------|
| 8130 | 0.982 | 0.981 | 0.986 | 0.982 |
| 8140 | 0.986 | 0.985 | 0.989 | 0.986 |
| 8150 | 0.982 | 0.982 | 0.987 | 0.982 |
| 8160 | 0.982 | 0.982 | 0.988 | 0.982 |
| 8170 | 0.980 | 0.980 | 0.985 | 0.980 |
| 8180 | 0.982 | 0.982 | 0.988 | 0.982 |
| 8190 | 0.983 | 0.983 | 0.986 | 0.983 |
| 8200 | 0.982 | 0.982 | 0.988 | 0.982 |
| 8210 | 0.980 | 0.980 | 0.985 | 0.980 |
| 8220 | 0.982 | 0.981 | 0.987 | 0.982 |
| 8230 | 0.978 | 0.978 | 0.984 | 0.978 |
| 8240 | 0.981 | 0.980 | 0.987 | 0.981 |
| 8250 | 0.983 | 0.983 | 0.987 | 0.983 |
| 8260 | 0.981 | 0.980 | 0.985 | 0.981 |
| 8270 | 0.982 | 0.981 | 0.986 | 0.982 |
| 8280 | 0.982 | 0.981 | 0.988 | 0.982 |
| 8290 | 0.982 | 0.982 | 0.986 | 0.982 |
| 8300 | 0.983 | 0.983 | 0.988 | 0.983 |
| 8310 | 0.978 | 0.977 | 0.984 | 0.977 |
| 8320 | 0.981 | 0.980 | 0.986 | 0.981 |
| 8330 | 0.986 | 0.985 | 0.990 | 0.986 |
| 8340 | 0.984 | 0.984 | 0.989 | 0.984 |
| 8350 | 0.985 | 0.985 | 0.989 | 0.985 |
| 8360 | 0.982 | 0.981 | 0.986 | 0.982 |
| 8370 | 0.982 | 0.982 | 0.987 | 0.982 |
| 8380 | 0.981 | 0.980 | 0.985 | 0.981 |
| 8390 | 0.981 | 0.980 | 0.985 | 0.981 |
| 8400 | 0.982 | 0.981 | 0.985 | 0.982 |
| 8410 | 0.982 | 0.981 | 0.986 | 0.982 |
| 8420 | 0.980 | 0.979 | 0.984 | 0.980 |
| 8430 | 0.982 | 0.982 | 0.987 | 0.982 |
| 8440 | 0.982 | 0.981 | 0.987 | 0.982 |
| 8450 | 0.980 | 0.980 | 0.986 | 0.980 |
| 8460 | 0.980 | 0.980 | 0.986 | 0.980 |
| 8470 | 0.984 | 0.983 | 0.986 | 0.984 |
| 8480 | 0.984 | 0.983 | 0.987 | 0.984 |
| 8490 | 0.982 | 0.981 | 0.986 | 0.982 |
| 8500 | 0.981 | 0.980 | 0.986 | 0.981 |
| 8510 | 0.982 | 0.982 | 0.988 | 0.982 |
| 8520 | 0.984 | 0.983 | 0.988 | 0.984 |
| 8530 | 0.978 | 0.978 | 0.984 | 0.978 |
| 8540 | 0.983 | 0.983 | 0.987 | 0.983 |
| 8550 | 0.980 | 0.979 | 0.985 | 0.980 |

|      |       |       |       |       |
|------|-------|-------|-------|-------|
| 8560 | 0.985 | 0.985 | 0.989 | 0.985 |
| 8570 | 0.986 | 0.985 | 0.989 | 0.986 |
| 8580 | 0.981 | 0.980 | 0.984 | 0.981 |
| 8590 | 0.984 | 0.984 | 0.988 | 0.984 |
| 8600 | 0.986 | 0.985 | 0.990 | 0.986 |
| 8610 | 0.985 | 0.985 | 0.989 | 0.985 |
| 8620 | 0.982 | 0.982 | 0.986 | 0.982 |
| 8630 | 0.982 | 0.981 | 0.984 | 0.982 |
| 8640 | 0.982 | 0.982 | 0.987 | 0.982 |
| 8650 | 0.982 | 0.982 | 0.987 | 0.982 |
| 8660 | 0.981 | 0.980 | 0.987 | 0.981 |
| 8670 | 0.982 | 0.981 | 0.985 | 0.982 |
| 8680 | 0.982 | 0.981 | 0.987 | 0.981 |
| 8690 | 0.979 | 0.978 | 0.983 | 0.979 |
| 8700 | 0.981 | 0.980 | 0.987 | 0.981 |
| 8710 | 0.980 | 0.980 | 0.986 | 0.980 |
| 8720 | 0.985 | 0.985 | 0.990 | 0.985 |
| 8730 | 0.980 | 0.980 | 0.987 | 0.980 |
| 8740 | 0.983 | 0.983 | 0.988 | 0.983 |
| 8750 | 0.980 | 0.980 | 0.984 | 0.980 |
| 8760 | 0.986 | 0.985 | 0.989 | 0.986 |
| 8770 | 0.981 | 0.980 | 0.986 | 0.981 |
| 8780 | 0.982 | 0.982 | 0.987 | 0.982 |
| 8790 | 0.986 | 0.985 | 0.989 | 0.986 |
| 8800 | 0.980 | 0.979 | 0.984 | 0.980 |
| 8810 | 0.982 | 0.982 | 0.988 | 0.982 |
| 8820 | 0.983 | 0.983 | 0.988 | 0.983 |
| 8830 | 0.983 | 0.983 | 0.986 | 0.983 |
| 8840 | 0.982 | 0.982 | 0.986 | 0.982 |
| 8850 | 0.987 | 0.987 | 0.990 | 0.987 |
| 8860 | 0.984 | 0.984 | 0.989 | 0.984 |
| 8870 | 0.980 | 0.980 | 0.983 | 0.980 |
| 8880 | 0.982 | 0.982 | 0.987 | 0.982 |
| 8890 | 0.984 | 0.984 | 0.988 | 0.984 |
| 8900 | 0.986 | 0.986 | 0.990 | 0.986 |
| 8910 | 0.983 | 0.983 | 0.988 | 0.983 |
| 8920 | 0.986 | 0.986 | 0.990 | 0.986 |
| 8930 | 0.982 | 0.982 | 0.987 | 0.982 |
| 8940 | 0.982 | 0.981 | 0.987 | 0.981 |
| 8950 | 0.984 | 0.983 | 0.988 | 0.984 |

(2) IFS results with DT on the LASSO feature list

| Number of features | ACC | MCC | Macro F1 | Weighted F1 |
|--------------------|-----|-----|----------|-------------|
|--------------------|-----|-----|----------|-------------|

|     |       |       |       |       |
|-----|-------|-------|-------|-------|
| 10  | 0.606 | 0.596 | 0.651 | 0.603 |
| 20  | 0.705 | 0.697 | 0.709 | 0.700 |
| 30  | 0.743 | 0.737 | 0.747 | 0.743 |
| 40  | 0.747 | 0.740 | 0.752 | 0.748 |
| 50  | 0.735 | 0.728 | 0.738 | 0.734 |
| 60  | 0.747 | 0.740 | 0.755 | 0.744 |
| 70  | 0.769 | 0.763 | 0.765 | 0.771 |
| 80  | 0.755 | 0.748 | 0.749 | 0.756 |
| 90  | 0.764 | 0.758 | 0.767 | 0.763 |
| 100 | 0.767 | 0.761 | 0.757 | 0.767 |
| 110 | 0.772 | 0.766 | 0.775 | 0.774 |
| 120 | 0.756 | 0.749 | 0.756 | 0.756 |
| 130 | 0.771 | 0.765 | 0.772 | 0.770 |
| 140 | 0.762 | 0.756 | 0.763 | 0.763 |
| 150 | 0.766 | 0.759 | 0.758 | 0.766 |
| 160 | 0.788 | 0.782 | 0.789 | 0.790 |
| 170 | 0.762 | 0.756 | 0.768 | 0.763 |
| 180 | 0.763 | 0.757 | 0.756 | 0.764 |
| 190 | 0.788 | 0.782 | 0.793 | 0.788 |
| 200 | 0.776 | 0.770 | 0.782 | 0.776 |
| 210 | 0.777 | 0.771 | 0.784 | 0.774 |
| 220 | 0.778 | 0.772 | 0.780 | 0.779 |
| 230 | 0.785 | 0.780 | 0.788 | 0.784 |
| 240 | 0.778 | 0.772 | 0.784 | 0.776 |
| 250 | 0.783 | 0.778 | 0.782 | 0.784 |
| 260 | 0.790 | 0.784 | 0.788 | 0.790 |
| 270 | 0.800 | 0.794 | 0.795 | 0.799 |
| 280 | 0.792 | 0.787 | 0.788 | 0.792 |
| 290 | 0.806 | 0.801 | 0.799 | 0.806 |
| 300 | 0.793 | 0.787 | 0.788 | 0.793 |
| 310 | 0.778 | 0.772 | 0.778 | 0.778 |
| 320 | 0.800 | 0.794 | 0.798 | 0.800 |
| 330 | 0.794 | 0.788 | 0.789 | 0.795 |
| 340 | 0.804 | 0.799 | 0.797 | 0.805 |
| 350 | 0.830 | 0.826 | 0.829 | 0.830 |
| 360 | 0.798 | 0.793 | 0.793 | 0.799 |
| 370 | 0.809 | 0.803 | 0.802 | 0.809 |
| 380 | 0.802 | 0.797 | 0.806 | 0.801 |
| 390 | 0.810 | 0.805 | 0.803 | 0.811 |
| 400 | 0.813 | 0.808 | 0.809 | 0.814 |
| 410 | 0.795 | 0.790 | 0.790 | 0.794 |
| 420 | 0.812 | 0.807 | 0.801 | 0.813 |
| 430 | 0.810 | 0.805 | 0.802 | 0.811 |

|     |       |       |       |       |
|-----|-------|-------|-------|-------|
| 440 | 0.810 | 0.805 | 0.808 | 0.811 |
| 450 | 0.818 | 0.813 | 0.815 | 0.817 |
| 460 | 0.815 | 0.810 | 0.808 | 0.815 |
| 470 | 0.802 | 0.796 | 0.797 | 0.804 |
| 480 | 0.815 | 0.811 | 0.805 | 0.815 |
| 490 | 0.794 | 0.788 | 0.787 | 0.793 |
| 500 | 0.802 | 0.796 | 0.785 | 0.803 |
| 510 | 0.807 | 0.802 | 0.804 | 0.807 |
| 520 | 0.815 | 0.810 | 0.808 | 0.815 |
| 530 | 0.821 | 0.816 | 0.815 | 0.822 |
| 540 | 0.785 | 0.779 | 0.772 | 0.785 |
| 550 | 0.802 | 0.797 | 0.792 | 0.804 |
| 560 | 0.816 | 0.811 | 0.807 | 0.816 |
| 570 | 0.804 | 0.799 | 0.801 | 0.803 |
| 580 | 0.809 | 0.803 | 0.805 | 0.810 |
| 590 | 0.806 | 0.801 | 0.799 | 0.805 |
| 600 | 0.823 | 0.818 | 0.818 | 0.825 |
| 610 | 0.819 | 0.815 | 0.811 | 0.819 |
| 620 | 0.832 | 0.827 | 0.832 | 0.831 |
| 630 | 0.802 | 0.797 | 0.796 | 0.802 |
| 640 | 0.804 | 0.798 | 0.802 | 0.804 |
| 650 | 0.817 | 0.812 | 0.816 | 0.817 |
| 660 | 0.807 | 0.802 | 0.801 | 0.807 |
| 670 | 0.809 | 0.803 | 0.812 | 0.809 |
| 680 | 0.811 | 0.805 | 0.807 | 0.810 |
| 690 | 0.814 | 0.809 | 0.801 | 0.815 |
| 700 | 0.804 | 0.799 | 0.796 | 0.804 |
| 710 | 0.807 | 0.802 | 0.797 | 0.808 |
| 720 | 0.805 | 0.800 | 0.799 | 0.806 |
| 730 | 0.809 | 0.804 | 0.810 | 0.808 |
| 740 | 0.802 | 0.796 | 0.807 | 0.802 |
| 750 | 0.811 | 0.805 | 0.813 | 0.811 |
| 760 | 0.815 | 0.810 | 0.817 | 0.814 |
| 770 | 0.817 | 0.812 | 0.815 | 0.816 |
| 780 | 0.821 | 0.816 | 0.822 | 0.821 |
| 790 | 0.808 | 0.803 | 0.809 | 0.809 |
| 800 | 0.823 | 0.818 | 0.829 | 0.822 |
| 810 | 0.821 | 0.817 | 0.823 | 0.823 |
| 820 | 0.813 | 0.808 | 0.812 | 0.812 |
| 830 | 0.798 | 0.792 | 0.802 | 0.799 |
| 840 | 0.813 | 0.808 | 0.809 | 0.812 |
| 850 | 0.819 | 0.814 | 0.818 | 0.820 |
| 860 | 0.821 | 0.817 | 0.820 | 0.822 |

|      |       |       |       |       |
|------|-------|-------|-------|-------|
| 870  | 0.820 | 0.815 | 0.818 | 0.821 |
| 880  | 0.816 | 0.811 | 0.813 | 0.815 |
| 890  | 0.817 | 0.812 | 0.814 | 0.818 |
| 900  | 0.828 | 0.823 | 0.835 | 0.828 |
| 910  | 0.822 | 0.817 | 0.820 | 0.822 |
| 920  | 0.822 | 0.817 | 0.824 | 0.822 |
| 930  | 0.811 | 0.805 | 0.814 | 0.812 |
| 940  | 0.817 | 0.812 | 0.810 | 0.817 |
| 950  | 0.807 | 0.801 | 0.800 | 0.807 |
| 960  | 0.827 | 0.822 | 0.828 | 0.825 |
| 970  | 0.829 | 0.824 | 0.823 | 0.829 |
| 980  | 0.813 | 0.808 | 0.807 | 0.814 |
| 990  | 0.819 | 0.815 | 0.820 | 0.818 |
| 1000 | 0.817 | 0.812 | 0.814 | 0.817 |
| 1010 | 0.805 | 0.800 | 0.800 | 0.807 |
| 1020 | 0.798 | 0.792 | 0.806 | 0.796 |
| 1030 | 0.815 | 0.810 | 0.817 | 0.816 |
| 1040 | 0.828 | 0.824 | 0.831 | 0.828 |
| 1050 | 0.822 | 0.817 | 0.825 | 0.821 |
| 1060 | 0.815 | 0.810 | 0.810 | 0.814 |
| 1070 | 0.818 | 0.813 | 0.817 | 0.819 |
| 1080 | 0.807 | 0.802 | 0.805 | 0.808 |
| 1090 | 0.836 | 0.832 | 0.835 | 0.834 |
| 1100 | 0.816 | 0.811 | 0.819 | 0.818 |
| 1110 | 0.835 | 0.831 | 0.831 | 0.835 |
| 1120 | 0.832 | 0.827 | 0.826 | 0.834 |
| 1130 | 0.830 | 0.826 | 0.823 | 0.833 |
| 1140 | 0.828 | 0.823 | 0.825 | 0.828 |
| 1150 | 0.826 | 0.821 | 0.820 | 0.824 |
| 1160 | 0.826 | 0.821 | 0.827 | 0.827 |
| 1170 | 0.814 | 0.809 | 0.803 | 0.813 |
| 1180 | 0.819 | 0.815 | 0.813 | 0.822 |
| 1190 | 0.826 | 0.821 | 0.837 | 0.826 |
| 1200 | 0.819 | 0.814 | 0.824 | 0.819 |
| 1210 | 0.827 | 0.822 | 0.818 | 0.826 |
| 1220 | 0.813 | 0.808 | 0.807 | 0.814 |
| 1230 | 0.823 | 0.818 | 0.826 | 0.822 |
| 1240 | 0.825 | 0.820 | 0.827 | 0.826 |
| 1250 | 0.830 | 0.826 | 0.827 | 0.830 |
| 1260 | 0.822 | 0.817 | 0.821 | 0.823 |
| 1270 | 0.822 | 0.817 | 0.822 | 0.822 |
| 1280 | 0.834 | 0.829 | 0.834 | 0.833 |
| 1290 | 0.813 | 0.808 | 0.797 | 0.815 |



|      |       |       |       |       |
|------|-------|-------|-------|-------|
| 1300 | 0.822 | 0.817 | 0.814 | 0.822 |
| 1310 | 0.830 | 0.826 | 0.826 | 0.833 |
| 1320 | 0.809 | 0.804 | 0.806 | 0.810 |
| 1330 | 0.821 | 0.817 | 0.824 | 0.821 |
| 1340 | 0.824 | 0.819 | 0.817 | 0.824 |
| 1350 | 0.822 | 0.817 | 0.829 | 0.823 |
| 1360 | 0.834 | 0.829 | 0.827 | 0.835 |
| 1370 | 0.816 | 0.811 | 0.812 | 0.817 |
| 1380 | 0.813 | 0.808 | 0.816 | 0.814 |
| 1390 | 0.825 | 0.820 | 0.829 | 0.823 |
| 1400 | 0.829 | 0.824 | 0.822 | 0.829 |
| 1410 | 0.802 | 0.797 | 0.788 | 0.803 |
| 1420 | 0.833 | 0.828 | 0.836 | 0.832 |
| 1430 | 0.825 | 0.820 | 0.828 | 0.824 |
| 1440 | 0.827 | 0.822 | 0.817 | 0.827 |
| 1450 | 0.834 | 0.829 | 0.829 | 0.833 |
| 1460 | 0.828 | 0.823 | 0.828 | 0.828 |
| 1470 | 0.827 | 0.822 | 0.823 | 0.826 |
| 1480 | 0.828 | 0.823 | 0.817 | 0.828 |
| 1490 | 0.841 | 0.837 | 0.836 | 0.842 |
| 1500 | 0.824 | 0.819 | 0.817 | 0.824 |
| 1510 | 0.823 | 0.818 | 0.816 | 0.823 |
| 1520 | 0.830 | 0.825 | 0.816 | 0.829 |
| 1530 | 0.840 | 0.836 | 0.837 | 0.841 |
| 1540 | 0.815 | 0.810 | 0.811 | 0.814 |
| 1550 | 0.824 | 0.819 | 0.821 | 0.826 |
| 1560 | 0.821 | 0.816 | 0.810 | 0.822 |
| 1570 | 0.830 | 0.825 | 0.820 | 0.829 |
| 1580 | 0.823 | 0.819 | 0.817 | 0.823 |
| 1590 | 0.838 | 0.833 | 0.830 | 0.837 |
| 1600 | 0.811 | 0.805 | 0.803 | 0.812 |
| 1610 | 0.833 | 0.828 | 0.825 | 0.834 |
| 1620 | 0.828 | 0.823 | 0.828 | 0.828 |
| 1630 | 0.843 | 0.839 | 0.843 | 0.843 |
| 1640 | 0.827 | 0.822 | 0.823 | 0.828 |
| 1650 | 0.832 | 0.828 | 0.834 | 0.832 |
| 1660 | 0.835 | 0.831 | 0.819 | 0.835 |
| 1670 | 0.822 | 0.817 | 0.814 | 0.822 |
| 1680 | 0.838 | 0.833 | 0.834 | 0.837 |
| 1690 | 0.830 | 0.826 | 0.822 | 0.832 |
| 1700 | 0.819 | 0.815 | 0.811 | 0.820 |
| 1710 | 0.829 | 0.824 | 0.822 | 0.829 |
| 1720 | 0.817 | 0.812 | 0.815 | 0.817 |

|      |       |       |       |       |
|------|-------|-------|-------|-------|
| 1730 | 0.835 | 0.831 | 0.828 | 0.836 |
| 1740 | 0.820 | 0.815 | 0.815 | 0.821 |
| 1750 | 0.832 | 0.827 | 0.835 | 0.833 |
| 1760 | 0.830 | 0.826 | 0.822 | 0.831 |
| 1770 | 0.849 | 0.845 | 0.845 | 0.849 |
| 1780 | 0.812 | 0.807 | 0.806 | 0.813 |
| 1790 | 0.834 | 0.829 | 0.827 | 0.834 |
| 1800 | 0.833 | 0.829 | 0.831 | 0.833 |
| 1810 | 0.826 | 0.822 | 0.825 | 0.827 |
| 1820 | 0.825 | 0.820 | 0.822 | 0.823 |
| 1830 | 0.823 | 0.819 | 0.815 | 0.825 |
| 1840 | 0.821 | 0.816 | 0.809 | 0.821 |
| 1850 | 0.814 | 0.809 | 0.815 | 0.811 |
| 1860 | 0.819 | 0.814 | 0.809 | 0.819 |
| 1870 | 0.817 | 0.812 | 0.807 | 0.818 |
| 1880 | 0.821 | 0.816 | 0.822 | 0.821 |
| 1890 | 0.816 | 0.811 | 0.812 | 0.815 |
| 1900 | 0.829 | 0.824 | 0.820 | 0.829 |
| 1910 | 0.819 | 0.815 | 0.813 | 0.818 |
| 1920 | 0.828 | 0.823 | 0.829 | 0.828 |
| 1930 | 0.821 | 0.817 | 0.821 | 0.821 |
| 1940 | 0.811 | 0.805 | 0.812 | 0.811 |
| 1950 | 0.836 | 0.832 | 0.827 | 0.836 |
| 1960 | 0.817 | 0.812 | 0.819 | 0.817 |
| 1970 | 0.819 | 0.815 | 0.812 | 0.821 |
| 1980 | 0.823 | 0.818 | 0.816 | 0.824 |
| 1990 | 0.822 | 0.817 | 0.833 | 0.822 |
| 2000 | 0.833 | 0.829 | 0.831 | 0.834 |
| 2010 | 0.838 | 0.834 | 0.832 | 0.838 |
| 2020 | 0.837 | 0.833 | 0.834 | 0.836 |
| 2030 | 0.828 | 0.823 | 0.824 | 0.827 |
| 2040 | 0.830 | 0.825 | 0.831 | 0.830 |
| 2050 | 0.826 | 0.822 | 0.821 | 0.827 |
| 2060 | 0.823 | 0.818 | 0.816 | 0.823 |
| 2070 | 0.832 | 0.827 | 0.825 | 0.831 |
| 2080 | 0.817 | 0.812 | 0.809 | 0.816 |
| 2090 | 0.834 | 0.830 | 0.825 | 0.834 |
| 2100 | 0.823 | 0.819 | 0.820 | 0.822 |
| 2110 | 0.826 | 0.821 | 0.826 | 0.827 |
| 2120 | 0.817 | 0.812 | 0.822 | 0.818 |
| 2130 | 0.813 | 0.808 | 0.807 | 0.813 |
| 2140 | 0.819 | 0.814 | 0.807 | 0.819 |
| 2150 | 0.840 | 0.836 | 0.827 | 0.839 |

|      |       |       |       |       |
|------|-------|-------|-------|-------|
| 2160 | 0.836 | 0.831 | 0.834 | 0.836 |
| 2170 | 0.832 | 0.827 | 0.833 | 0.830 |
| 2180 | 0.825 | 0.820 | 0.814 | 0.825 |
| 2190 | 0.815 | 0.810 | 0.803 | 0.816 |
| 2200 | 0.837 | 0.833 | 0.825 | 0.837 |
| 2210 | 0.826 | 0.822 | 0.824 | 0.826 |
| 2220 | 0.828 | 0.824 | 0.818 | 0.828 |
| 2230 | 0.811 | 0.805 | 0.798 | 0.811 |
| 2240 | 0.821 | 0.816 | 0.820 | 0.820 |
| 2250 | 0.820 | 0.815 | 0.817 | 0.820 |
| 2260 | 0.821 | 0.816 | 0.814 | 0.822 |
| 2270 | 0.813 | 0.808 | 0.809 | 0.813 |
| 2280 | 0.823 | 0.818 | 0.820 | 0.822 |
| 2290 | 0.844 | 0.840 | 0.838 | 0.843 |
| 2300 | 0.835 | 0.831 | 0.833 | 0.835 |
| 2310 | 0.834 | 0.829 | 0.836 | 0.833 |
| 2320 | 0.811 | 0.806 | 0.798 | 0.812 |
| 2330 | 0.823 | 0.818 | 0.822 | 0.823 |
| 2340 | 0.827 | 0.822 | 0.829 | 0.828 |
| 2350 | 0.823 | 0.819 | 0.812 | 0.824 |
| 2360 | 0.812 | 0.807 | 0.808 | 0.811 |
| 2370 | 0.822 | 0.817 | 0.821 | 0.823 |
| 2380 | 0.818 | 0.813 | 0.824 | 0.818 |
| 2390 | 0.815 | 0.810 | 0.814 | 0.814 |
| 2400 | 0.834 | 0.829 | 0.821 | 0.832 |
| 2410 | 0.826 | 0.822 | 0.828 | 0.825 |
| 2420 | 0.829 | 0.824 | 0.827 | 0.829 |
| 2430 | 0.840 | 0.835 | 0.826 | 0.840 |
| 2440 | 0.814 | 0.809 | 0.820 | 0.813 |
| 2450 | 0.807 | 0.801 | 0.807 | 0.806 |
| 2460 | 0.822 | 0.817 | 0.818 | 0.821 |
| 2470 | 0.823 | 0.818 | 0.811 | 0.822 |
| 2480 | 0.842 | 0.838 | 0.840 | 0.842 |
| 2490 | 0.836 | 0.831 | 0.839 | 0.836 |
| 2500 | 0.819 | 0.815 | 0.821 | 0.817 |
| 2510 | 0.823 | 0.819 | 0.819 | 0.821 |
| 2520 | 0.816 | 0.811 | 0.810 | 0.817 |
| 2530 | 0.832 | 0.827 | 0.826 | 0.832 |
| 2540 | 0.819 | 0.814 | 0.825 | 0.819 |
| 2550 | 0.812 | 0.807 | 0.805 | 0.810 |
| 2560 | 0.830 | 0.826 | 0.829 | 0.830 |
| 2570 | 0.827 | 0.822 | 0.811 | 0.826 |
| 2580 | 0.830 | 0.826 | 0.829 | 0.829 |

|      |       |       |       |       |
|------|-------|-------|-------|-------|
| 2590 | 0.819 | 0.814 | 0.811 | 0.818 |
| 2600 | 0.830 | 0.826 | 0.825 | 0.829 |
| 2610 | 0.828 | 0.824 | 0.825 | 0.828 |
| 2620 | 0.823 | 0.818 | 0.818 | 0.822 |
| 2630 | 0.824 | 0.819 | 0.822 | 0.825 |
| 2640 | 0.823 | 0.818 | 0.809 | 0.823 |
| 2650 | 0.824 | 0.819 | 0.813 | 0.825 |
| 2660 | 0.830 | 0.826 | 0.817 | 0.830 |
| 2670 | 0.829 | 0.824 | 0.827 | 0.829 |
| 2680 | 0.825 | 0.820 | 0.818 | 0.827 |
| 2690 | 0.828 | 0.823 | 0.827 | 0.828 |
| 2700 | 0.828 | 0.824 | 0.834 | 0.829 |
| 2710 | 0.832 | 0.828 | 0.828 | 0.833 |
| 2720 | 0.825 | 0.820 | 0.823 | 0.825 |
| 2730 | 0.829 | 0.824 | 0.828 | 0.829 |
| 2740 | 0.843 | 0.839 | 0.838 | 0.842 |
| 2750 | 0.827 | 0.822 | 0.822 | 0.828 |
| 2760 | 0.813 | 0.808 | 0.808 | 0.815 |
| 2770 | 0.821 | 0.816 | 0.813 | 0.820 |
| 2780 | 0.817 | 0.812 | 0.820 | 0.818 |
| 2790 | 0.828 | 0.823 | 0.822 | 0.828 |
| 2800 | 0.818 | 0.813 | 0.817 | 0.818 |
| 2810 | 0.822 | 0.817 | 0.825 | 0.822 |
| 2820 | 0.834 | 0.829 | 0.825 | 0.834 |
| 2830 | 0.838 | 0.834 | 0.825 | 0.838 |
| 2840 | 0.833 | 0.828 | 0.833 | 0.832 |
| 2850 | 0.831 | 0.826 | 0.828 | 0.832 |
| 2860 | 0.826 | 0.821 | 0.825 | 0.827 |
| 2870 | 0.826 | 0.821 | 0.822 | 0.824 |
| 2880 | 0.828 | 0.823 | 0.831 | 0.827 |
| 2890 | 0.829 | 0.824 | 0.828 | 0.829 |
| 2900 | 0.831 | 0.826 | 0.823 | 0.831 |
| 2910 | 0.821 | 0.817 | 0.818 | 0.821 |
| 2920 | 0.840 | 0.835 | 0.838 | 0.840 |
| 2930 | 0.829 | 0.824 | 0.819 | 0.830 |
| 2940 | 0.821 | 0.817 | 0.828 | 0.819 |
| 2950 | 0.817 | 0.812 | 0.825 | 0.817 |
| 2960 | 0.825 | 0.820 | 0.831 | 0.825 |
| 2970 | 0.827 | 0.822 | 0.830 | 0.826 |
| 2980 | 0.840 | 0.835 | 0.845 | 0.840 |
| 2990 | 0.826 | 0.821 | 0.816 | 0.826 |
| 3000 | 0.823 | 0.819 | 0.807 | 0.824 |
| 3010 | 0.824 | 0.819 | 0.826 | 0.824 |

|      |       |       |       |       |
|------|-------|-------|-------|-------|
| 3020 | 0.838 | 0.833 | 0.834 | 0.837 |
| 3030 | 0.819 | 0.814 | 0.812 | 0.818 |
| 3040 | 0.820 | 0.815 | 0.816 | 0.819 |
| 3050 | 0.824 | 0.819 | 0.829 | 0.824 |
| 3060 | 0.826 | 0.821 | 0.821 | 0.826 |
| 3070 | 0.834 | 0.829 | 0.833 | 0.834 |
| 3080 | 0.831 | 0.826 | 0.841 | 0.830 |
| 3090 | 0.826 | 0.821 | 0.814 | 0.825 |
| 3100 | 0.812 | 0.807 | 0.812 | 0.812 |
| 3110 | 0.833 | 0.829 | 0.831 | 0.832 |
| 3120 | 0.836 | 0.832 | 0.830 | 0.834 |
| 3130 | 0.813 | 0.808 | 0.808 | 0.813 |
| 3140 | 0.840 | 0.836 | 0.838 | 0.841 |
| 3150 | 0.827 | 0.822 | 0.811 | 0.828 |
| 3160 | 0.838 | 0.834 | 0.840 | 0.839 |
| 3170 | 0.819 | 0.814 | 0.825 | 0.819 |
| 3180 | 0.822 | 0.817 | 0.820 | 0.823 |
| 3190 | 0.836 | 0.832 | 0.842 | 0.836 |
| 3200 | 0.825 | 0.820 | 0.820 | 0.825 |
| 3210 | 0.830 | 0.826 | 0.824 | 0.830 |
| 3220 | 0.833 | 0.829 | 0.818 | 0.833 |
| 3230 | 0.825 | 0.820 | 0.829 | 0.825 |
| 3240 | 0.840 | 0.836 | 0.841 | 0.840 |
| 3250 | 0.840 | 0.836 | 0.838 | 0.841 |
| 3260 | 0.831 | 0.826 | 0.829 | 0.832 |
| 3270 | 0.832 | 0.827 | 0.833 | 0.831 |
| 3280 | 0.816 | 0.811 | 0.817 | 0.815 |
| 3290 | 0.828 | 0.824 | 0.832 | 0.827 |
| 3300 | 0.820 | 0.815 | 0.823 | 0.819 |
| 3310 | 0.831 | 0.826 | 0.821 | 0.832 |
| 3320 | 0.838 | 0.834 | 0.832 | 0.840 |
| 3330 | 0.813 | 0.808 | 0.822 | 0.813 |
| 3340 | 0.826 | 0.821 | 0.813 | 0.827 |
| 3350 | 0.823 | 0.818 | 0.813 | 0.822 |
| 3360 | 0.819 | 0.814 | 0.823 | 0.820 |
| 3370 | 0.836 | 0.831 | 0.828 | 0.836 |
| 3380 | 0.838 | 0.833 | 0.829 | 0.839 |
| 3390 | 0.815 | 0.810 | 0.809 | 0.815 |
| 3400 | 0.836 | 0.831 | 0.835 | 0.837 |
| 3410 | 0.836 | 0.832 | 0.833 | 0.838 |
| 3420 | 0.842 | 0.838 | 0.840 | 0.841 |
| 3430 | 0.837 | 0.833 | 0.836 | 0.838 |
| 3440 | 0.834 | 0.829 | 0.835 | 0.835 |

|      |       |       |       |       |
|------|-------|-------|-------|-------|
| 3450 | 0.826 | 0.822 | 0.828 | 0.826 |
| 3460 | 0.819 | 0.814 | 0.814 | 0.819 |
| 3470 | 0.831 | 0.826 | 0.829 | 0.830 |
| 3480 | 0.813 | 0.808 | 0.809 | 0.814 |
| 3490 | 0.826 | 0.821 | 0.820 | 0.825 |
| 3500 | 0.824 | 0.819 | 0.815 | 0.823 |
| 3510 | 0.816 | 0.811 | 0.818 | 0.816 |
| 3520 | 0.817 | 0.812 | 0.813 | 0.817 |
| 3530 | 0.812 | 0.807 | 0.805 | 0.811 |
| 3540 | 0.821 | 0.816 | 0.825 | 0.821 |
| 3550 | 0.838 | 0.834 | 0.833 | 0.838 |
| 3560 | 0.835 | 0.830 | 0.831 | 0.834 |
| 3570 | 0.851 | 0.846 | 0.851 | 0.850 |
| 3580 | 0.809 | 0.803 | 0.809 | 0.808 |
| 3590 | 0.828 | 0.823 | 0.836 | 0.828 |
| 3600 | 0.834 | 0.829 | 0.839 | 0.834 |
| 3610 | 0.826 | 0.821 | 0.818 | 0.826 |
| 3620 | 0.831 | 0.826 | 0.829 | 0.829 |
| 3630 | 0.824 | 0.819 | 0.819 | 0.823 |
| 3640 | 0.819 | 0.814 | 0.816 | 0.819 |
| 3650 | 0.821 | 0.817 | 0.811 | 0.823 |
| 3660 | 0.835 | 0.831 | 0.839 | 0.835 |
| 3670 | 0.823 | 0.819 | 0.823 | 0.823 |
| 3680 | 0.828 | 0.823 | 0.823 | 0.827 |
| 3690 | 0.830 | 0.825 | 0.825 | 0.831 |
| 3700 | 0.838 | 0.834 | 0.834 | 0.838 |
| 3710 | 0.839 | 0.835 | 0.848 | 0.840 |
| 3720 | 0.822 | 0.817 | 0.819 | 0.823 |
| 3730 | 0.811 | 0.805 | 0.803 | 0.810 |
| 3740 | 0.840 | 0.836 | 0.834 | 0.841 |
| 3750 | 0.827 | 0.822 | 0.836 | 0.827 |
| 3760 | 0.838 | 0.833 | 0.830 | 0.838 |
| 3770 | 0.822 | 0.817 | 0.823 | 0.820 |
| 3780 | 0.831 | 0.826 | 0.825 | 0.829 |
| 3790 | 0.838 | 0.834 | 0.841 | 0.837 |
| 3800 | 0.828 | 0.823 | 0.827 | 0.828 |
| 3810 | 0.828 | 0.823 | 0.834 | 0.827 |
| 3820 | 0.824 | 0.819 | 0.826 | 0.822 |
| 3830 | 0.845 | 0.840 | 0.846 | 0.846 |
| 3840 | 0.815 | 0.810 | 0.800 | 0.818 |
| 3850 | 0.834 | 0.829 | 0.826 | 0.834 |
| 3860 | 0.811 | 0.805 | 0.815 | 0.811 |
| 3870 | 0.832 | 0.827 | 0.831 | 0.833 |

|      |       |       |       |       |
|------|-------|-------|-------|-------|
| 3880 | 0.836 | 0.831 | 0.829 | 0.835 |
| 3890 | 0.832 | 0.827 | 0.827 | 0.832 |
| 3900 | 0.844 | 0.840 | 0.836 | 0.843 |
| 3910 | 0.835 | 0.831 | 0.831 | 0.834 |
| 3920 | 0.831 | 0.827 | 0.831 | 0.830 |
| 3930 | 0.834 | 0.829 | 0.840 | 0.833 |
| 3940 | 0.826 | 0.821 | 0.826 | 0.827 |
| 3950 | 0.818 | 0.813 | 0.809 | 0.819 |
| 3960 | 0.825 | 0.820 | 0.815 | 0.824 |
| 3970 | 0.837 | 0.833 | 0.836 | 0.837 |
| 3980 | 0.835 | 0.830 | 0.830 | 0.835 |
| 3990 | 0.823 | 0.818 | 0.816 | 0.824 |
| 4000 | 0.834 | 0.830 | 0.833 | 0.836 |
| 4010 | 0.820 | 0.815 | 0.823 | 0.820 |
| 4020 | 0.836 | 0.832 | 0.825 | 0.838 |
| 4030 | 0.830 | 0.825 | 0.820 | 0.831 |
| 4040 | 0.817 | 0.813 | 0.814 | 0.818 |
| 4050 | 0.821 | 0.816 | 0.809 | 0.822 |
| 4060 | 0.832 | 0.828 | 0.832 | 0.832 |
| 4070 | 0.834 | 0.830 | 0.825 | 0.833 |
| 4080 | 0.829 | 0.824 | 0.814 | 0.829 |
| 4090 | 0.836 | 0.831 | 0.835 | 0.834 |
| 4100 | 0.818 | 0.813 | 0.805 | 0.818 |
| 4110 | 0.823 | 0.819 | 0.826 | 0.825 |
| 4120 | 0.832 | 0.828 | 0.825 | 0.832 |
| 4130 | 0.814 | 0.809 | 0.815 | 0.814 |
| 4140 | 0.827 | 0.822 | 0.816 | 0.828 |
| 4150 | 0.840 | 0.836 | 0.834 | 0.838 |
| 4160 | 0.830 | 0.825 | 0.829 | 0.829 |
| 4170 | 0.825 | 0.820 | 0.814 | 0.825 |
| 4180 | 0.813 | 0.808 | 0.805 | 0.813 |
| 4190 | 0.832 | 0.827 | 0.831 | 0.833 |
| 4200 | 0.822 | 0.817 | 0.810 | 0.823 |
| 4210 | 0.831 | 0.826 | 0.830 | 0.832 |
| 4220 | 0.838 | 0.833 | 0.827 | 0.837 |
| 4230 | 0.833 | 0.828 | 0.834 | 0.834 |
| 4240 | 0.813 | 0.808 | 0.806 | 0.813 |
| 4250 | 0.835 | 0.831 | 0.836 | 0.835 |
| 4260 | 0.823 | 0.819 | 0.821 | 0.824 |
| 4270 | 0.823 | 0.819 | 0.815 | 0.825 |
| 4280 | 0.839 | 0.835 | 0.839 | 0.838 |
| 4290 | 0.823 | 0.818 | 0.814 | 0.823 |
| 4300 | 0.831 | 0.826 | 0.833 | 0.831 |

|      |       |       |       |       |
|------|-------|-------|-------|-------|
| 4310 | 0.832 | 0.828 | 0.830 | 0.832 |
| 4320 | 0.826 | 0.822 | 0.818 | 0.826 |
| 4330 | 0.837 | 0.833 | 0.830 | 0.837 |
| 4340 | 0.840 | 0.835 | 0.836 | 0.839 |
| 4350 | 0.835 | 0.831 | 0.836 | 0.835 |
| 4360 | 0.835 | 0.831 | 0.830 | 0.835 |
| 4370 | 0.832 | 0.827 | 0.829 | 0.832 |
| 4380 | 0.827 | 0.822 | 0.828 | 0.828 |
| 4390 | 0.824 | 0.820 | 0.818 | 0.825 |
| 4400 | 0.849 | 0.844 | 0.843 | 0.850 |
| 4410 | 0.835 | 0.831 | 0.836 | 0.835 |
| 4420 | 0.828 | 0.823 | 0.819 | 0.829 |
| 4430 | 0.834 | 0.829 | 0.824 | 0.834 |
| 4440 | 0.820 | 0.815 | 0.812 | 0.819 |
| 4450 | 0.834 | 0.830 | 0.832 | 0.834 |
| 4460 | 0.842 | 0.838 | 0.840 | 0.842 |
| 4470 | 0.828 | 0.824 | 0.829 | 0.828 |
| 4480 | 0.840 | 0.836 | 0.831 | 0.841 |
| 4490 | 0.826 | 0.822 | 0.821 | 0.825 |
| 4500 | 0.836 | 0.831 | 0.832 | 0.837 |
| 4510 | 0.828 | 0.823 | 0.821 | 0.829 |
| 4520 | 0.823 | 0.819 | 0.824 | 0.824 |
| 4530 | 0.832 | 0.827 | 0.835 | 0.832 |
| 4540 | 0.828 | 0.824 | 0.833 | 0.830 |
| 4550 | 0.838 | 0.834 | 0.849 | 0.837 |
| 4560 | 0.847 | 0.842 | 0.838 | 0.846 |
| 4570 | 0.836 | 0.832 | 0.828 | 0.836 |
| 4580 | 0.842 | 0.838 | 0.841 | 0.842 |
| 4590 | 0.840 | 0.836 | 0.837 | 0.841 |
| 4600 | 0.828 | 0.823 | 0.826 | 0.829 |
| 4610 | 0.832 | 0.828 | 0.833 | 0.833 |
| 4620 | 0.831 | 0.826 | 0.817 | 0.831 |
| 4630 | 0.822 | 0.817 | 0.819 | 0.821 |
| 4640 | 0.825 | 0.820 | 0.815 | 0.827 |
| 4650 | 0.823 | 0.818 | 0.821 | 0.824 |
| 4660 | 0.834 | 0.829 | 0.821 | 0.835 |
| 4670 | 0.824 | 0.819 | 0.820 | 0.825 |
| 4680 | 0.819 | 0.814 | 0.822 | 0.819 |
| 4690 | 0.835 | 0.830 | 0.826 | 0.835 |
| 4700 | 0.833 | 0.829 | 0.823 | 0.834 |
| 4710 | 0.839 | 0.835 | 0.823 | 0.841 |
| 4720 | 0.822 | 0.817 | 0.819 | 0.823 |
| 4730 | 0.830 | 0.826 | 0.831 | 0.829 |



|      |       |       |       |       |
|------|-------|-------|-------|-------|
| 4740 | 0.846 | 0.842 | 0.848 | 0.845 |
| 4750 | 0.830 | 0.826 | 0.819 | 0.830 |
| 4760 | 0.826 | 0.821 | 0.819 | 0.827 |
| 4770 | 0.832 | 0.827 | 0.820 | 0.833 |
| 4780 | 0.830 | 0.825 | 0.818 | 0.830 |
| 4790 | 0.825 | 0.820 | 0.816 | 0.825 |
| 4800 | 0.840 | 0.835 | 0.829 | 0.839 |
| 4810 | 0.834 | 0.829 | 0.836 | 0.834 |
| 4820 | 0.839 | 0.835 | 0.841 | 0.841 |
| 4830 | 0.823 | 0.819 | 0.816 | 0.824 |
| 4840 | 0.823 | 0.819 | 0.805 | 0.823 |
| 4850 | 0.834 | 0.829 | 0.836 | 0.834 |
| 4860 | 0.807 | 0.802 | 0.802 | 0.808 |
| 4870 | 0.838 | 0.833 | 0.829 | 0.839 |
| 4880 | 0.828 | 0.824 | 0.829 | 0.828 |
| 4890 | 0.824 | 0.819 | 0.816 | 0.825 |
| 4900 | 0.848 | 0.844 | 0.839 | 0.848 |
| 4910 | 0.838 | 0.833 | 0.823 | 0.838 |
| 4920 | 0.832 | 0.827 | 0.828 | 0.831 |
| 4930 | 0.834 | 0.830 | 0.832 | 0.835 |
| 4940 | 0.830 | 0.825 | 0.819 | 0.831 |
| 4950 | 0.822 | 0.817 | 0.814 | 0.823 |
| 4960 | 0.830 | 0.825 | 0.823 | 0.830 |
| 4970 | 0.834 | 0.829 | 0.828 | 0.833 |
| 4980 | 0.826 | 0.821 | 0.822 | 0.827 |
| 4990 | 0.830 | 0.825 | 0.828 | 0.831 |
| 5000 | 0.833 | 0.828 | 0.822 | 0.832 |
| 5010 | 0.831 | 0.826 | 0.825 | 0.831 |
| 5020 | 0.849 | 0.844 | 0.835 | 0.849 |
| 5030 | 0.845 | 0.840 | 0.838 | 0.844 |
| 5040 | 0.829 | 0.824 | 0.817 | 0.830 |
| 5050 | 0.832 | 0.828 | 0.827 | 0.832 |
| 5060 | 0.838 | 0.833 | 0.832 | 0.837 |
| 5070 | 0.827 | 0.822 | 0.822 | 0.826 |
| 5080 | 0.836 | 0.832 | 0.841 | 0.836 |
| 5090 | 0.831 | 0.826 | 0.828 | 0.830 |
| 5100 | 0.836 | 0.832 | 0.829 | 0.836 |
| 5110 | 0.822 | 0.817 | 0.820 | 0.823 |
| 5120 | 0.853 | 0.849 | 0.852 | 0.852 |
| 5130 | 0.832 | 0.827 | 0.824 | 0.832 |
| 5140 | 0.850 | 0.846 | 0.841 | 0.851 |
| 5150 | 0.834 | 0.829 | 0.821 | 0.836 |
| 5160 | 0.823 | 0.819 | 0.813 | 0.824 |

|      |       |       |       |       |
|------|-------|-------|-------|-------|
| 5170 | 0.855 | 0.851 | 0.854 | 0.856 |
| 5180 | 0.829 | 0.824 | 0.832 | 0.830 |
| 5190 | 0.848 | 0.844 | 0.838 | 0.848 |
| 5200 | 0.853 | 0.849 | 0.843 | 0.853 |
| 5210 | 0.847 | 0.842 | 0.841 | 0.847 |
| 5220 | 0.834 | 0.830 | 0.831 | 0.834 |
| 5230 | 0.838 | 0.834 | 0.835 | 0.838 |
| 5240 | 0.826 | 0.821 | 0.824 | 0.824 |
| 5250 | 0.838 | 0.834 | 0.839 | 0.836 |
| 5260 | 0.823 | 0.818 | 0.811 | 0.825 |
| 5270 | 0.842 | 0.837 | 0.841 | 0.843 |
| 5280 | 0.830 | 0.825 | 0.821 | 0.830 |
| 5290 | 0.845 | 0.841 | 0.840 | 0.845 |
| 5300 | 0.833 | 0.828 | 0.838 | 0.834 |
| 5310 | 0.821 | 0.817 | 0.818 | 0.820 |
| 5320 | 0.838 | 0.834 | 0.832 | 0.840 |
| 5330 | 0.824 | 0.820 | 0.826 | 0.824 |
| 5340 | 0.846 | 0.842 | 0.842 | 0.846 |
| 5350 | 0.828 | 0.824 | 0.822 | 0.827 |
| 5360 | 0.845 | 0.841 | 0.842 | 0.845 |
| 5370 | 0.842 | 0.838 | 0.839 | 0.842 |
| 5380 | 0.837 | 0.833 | 0.830 | 0.836 |
| 5390 | 0.859 | 0.856 | 0.862 | 0.859 |
| 5400 | 0.838 | 0.833 | 0.835 | 0.838 |
| 5410 | 0.834 | 0.830 | 0.827 | 0.834 |
| 5420 | 0.844 | 0.840 | 0.844 | 0.843 |
| 5430 | 0.837 | 0.833 | 0.829 | 0.837 |
| 5440 | 0.833 | 0.828 | 0.826 | 0.833 |
| 5450 | 0.831 | 0.826 | 0.821 | 0.832 |
| 5460 | 0.819 | 0.815 | 0.810 | 0.819 |
| 5470 | 0.828 | 0.824 | 0.818 | 0.828 |
| 5480 | 0.834 | 0.829 | 0.825 | 0.835 |
| 5490 | 0.843 | 0.839 | 0.833 | 0.841 |
| 5500 | 0.828 | 0.824 | 0.826 | 0.830 |
| 5510 | 0.847 | 0.843 | 0.841 | 0.847 |
| 5520 | 0.836 | 0.832 | 0.826 | 0.838 |
| 5530 | 0.834 | 0.829 | 0.825 | 0.832 |
| 5540 | 0.839 | 0.835 | 0.832 | 0.839 |
| 5550 | 0.832 | 0.827 | 0.825 | 0.833 |
| 5560 | 0.849 | 0.845 | 0.848 | 0.850 |
| 5570 | 0.836 | 0.831 | 0.828 | 0.836 |
| 5580 | 0.840 | 0.836 | 0.834 | 0.841 |
| 5590 | 0.853 | 0.849 | 0.852 | 0.854 |

|      |       |       |       |       |
|------|-------|-------|-------|-------|
| 5600 | 0.833 | 0.828 | 0.824 | 0.835 |
| 5610 | 0.840 | 0.835 | 0.829 | 0.839 |
| 5620 | 0.835 | 0.831 | 0.825 | 0.837 |
| 5630 | 0.842 | 0.838 | 0.838 | 0.844 |
| 5640 | 0.827 | 0.822 | 0.822 | 0.827 |
| 5650 | 0.834 | 0.830 | 0.832 | 0.834 |
| 5660 | 0.847 | 0.843 | 0.847 | 0.849 |
| 5670 | 0.836 | 0.831 | 0.821 | 0.837 |
| 5680 | 0.832 | 0.828 | 0.829 | 0.833 |
| 5690 | 0.836 | 0.832 | 0.826 | 0.838 |
| 5700 | 0.830 | 0.825 | 0.833 | 0.830 |
| 5710 | 0.828 | 0.823 | 0.826 | 0.828 |
| 5720 | 0.835 | 0.830 | 0.832 | 0.835 |
| 5730 | 0.842 | 0.838 | 0.837 | 0.843 |
| 5740 | 0.848 | 0.844 | 0.838 | 0.847 |
| 5750 | 0.838 | 0.834 | 0.825 | 0.837 |
| 5760 | 0.836 | 0.832 | 0.826 | 0.835 |
| 5770 | 0.846 | 0.842 | 0.838 | 0.846 |
| 5780 | 0.832 | 0.828 | 0.823 | 0.834 |
| 5790 | 0.855 | 0.851 | 0.849 | 0.856 |
| 5800 | 0.845 | 0.840 | 0.841 | 0.844 |
| 5810 | 0.838 | 0.833 | 0.831 | 0.838 |
| 5820 | 0.823 | 0.818 | 0.820 | 0.822 |
| 5830 | 0.837 | 0.833 | 0.828 | 0.837 |
| 5840 | 0.845 | 0.840 | 0.839 | 0.845 |
| 5850 | 0.821 | 0.816 | 0.820 | 0.822 |
| 5860 | 0.832 | 0.828 | 0.827 | 0.834 |
| 5870 | 0.840 | 0.836 | 0.837 | 0.840 |
| 5880 | 0.832 | 0.828 | 0.828 | 0.831 |
| 5890 | 0.837 | 0.833 | 0.840 | 0.837 |
| 5900 | 0.850 | 0.846 | 0.839 | 0.852 |
| 5910 | 0.835 | 0.831 | 0.826 | 0.835 |
| 5920 | 0.837 | 0.833 | 0.844 | 0.837 |
| 5930 | 0.837 | 0.833 | 0.829 | 0.838 |
| 5940 | 0.828 | 0.824 | 0.816 | 0.828 |
| 5950 | 0.847 | 0.843 | 0.848 | 0.849 |
| 5960 | 0.842 | 0.837 | 0.841 | 0.842 |
| 5970 | 0.834 | 0.830 | 0.831 | 0.835 |
| 5980 | 0.835 | 0.831 | 0.830 | 0.836 |
| 5990 | 0.848 | 0.844 | 0.841 | 0.846 |
| 6000 | 0.840 | 0.836 | 0.830 | 0.839 |
| 6010 | 0.834 | 0.829 | 0.829 | 0.835 |
| 6020 | 0.825 | 0.820 | 0.812 | 0.825 |

|      |       |       |       |       |
|------|-------|-------|-------|-------|
| 6030 | 0.829 | 0.824 | 0.824 | 0.830 |
| 6040 | 0.835 | 0.831 | 0.831 | 0.835 |
| 6050 | 0.827 | 0.822 | 0.820 | 0.827 |
| 6060 | 0.842 | 0.838 | 0.841 | 0.844 |
| 6070 | 0.840 | 0.835 | 0.834 | 0.841 |
| 6080 | 0.834 | 0.829 | 0.832 | 0.834 |
| 6090 | 0.835 | 0.831 | 0.827 | 0.834 |
| 6100 | 0.852 | 0.848 | 0.844 | 0.853 |
| 6110 | 0.839 | 0.835 | 0.839 | 0.838 |
| 6120 | 0.849 | 0.844 | 0.842 | 0.849 |
| 6130 | 0.847 | 0.842 | 0.837 | 0.847 |
| 6140 | 0.821 | 0.816 | 0.820 | 0.821 |
| 6150 | 0.858 | 0.854 | 0.853 | 0.859 |
| 6160 | 0.836 | 0.832 | 0.831 | 0.837 |
| 6170 | 0.829 | 0.824 | 0.825 | 0.830 |
| 6180 | 0.818 | 0.813 | 0.810 | 0.818 |
| 6190 | 0.831 | 0.826 | 0.827 | 0.832 |
| 6200 | 0.830 | 0.826 | 0.830 | 0.830 |
| 6210 | 0.832 | 0.827 | 0.830 | 0.832 |
| 6220 | 0.851 | 0.847 | 0.846 | 0.850 |
| 6230 | 0.834 | 0.829 | 0.825 | 0.835 |
| 6240 | 0.845 | 0.840 | 0.844 | 0.845 |
| 6250 | 0.819 | 0.814 | 0.805 | 0.820 |
| 6260 | 0.841 | 0.837 | 0.833 | 0.841 |
| 6270 | 0.838 | 0.833 | 0.832 | 0.838 |
| 6280 | 0.845 | 0.841 | 0.835 | 0.845 |
| 6290 | 0.840 | 0.835 | 0.843 | 0.841 |
| 6300 | 0.832 | 0.827 | 0.827 | 0.831 |
| 6310 | 0.830 | 0.825 | 0.817 | 0.830 |
| 6320 | 0.830 | 0.826 | 0.816 | 0.832 |
| 6330 | 0.821 | 0.816 | 0.818 | 0.820 |
| 6340 | 0.831 | 0.826 | 0.826 | 0.832 |
| 6350 | 0.843 | 0.839 | 0.844 | 0.843 |
| 6360 | 0.831 | 0.826 | 0.828 | 0.830 |
| 6370 | 0.838 | 0.834 | 0.833 | 0.840 |
| 6380 | 0.842 | 0.837 | 0.846 | 0.843 |
| 6390 | 0.840 | 0.836 | 0.828 | 0.841 |
| 6400 | 0.822 | 0.817 | 0.819 | 0.823 |
| 6410 | 0.828 | 0.823 | 0.819 | 0.827 |
| 6420 | 0.817 | 0.812 | 0.820 | 0.817 |
| 6430 | 0.833 | 0.829 | 0.835 | 0.832 |
| 6440 | 0.840 | 0.836 | 0.826 | 0.842 |
| 6450 | 0.820 | 0.815 | 0.813 | 0.820 |

|      |       |       |       |       |
|------|-------|-------|-------|-------|
| 6460 | 0.847 | 0.842 | 0.837 | 0.848 |
| 6470 | 0.835 | 0.831 | 0.829 | 0.834 |
| 6480 | 0.841 | 0.837 | 0.838 | 0.841 |
| 6490 | 0.849 | 0.845 | 0.846 | 0.850 |
| 6500 | 0.839 | 0.835 | 0.830 | 0.840 |
| 6510 | 0.845 | 0.840 | 0.843 | 0.844 |
| 6520 | 0.825 | 0.820 | 0.828 | 0.825 |
| 6530 | 0.833 | 0.829 | 0.827 | 0.833 |
| 6540 | 0.826 | 0.821 | 0.818 | 0.827 |
| 6550 | 0.832 | 0.827 | 0.828 | 0.832 |
| 6560 | 0.835 | 0.831 | 0.832 | 0.834 |
| 6570 | 0.829 | 0.824 | 0.822 | 0.830 |
| 6580 | 0.823 | 0.818 | 0.824 | 0.823 |
| 6590 | 0.830 | 0.826 | 0.825 | 0.831 |
| 6600 | 0.845 | 0.841 | 0.842 | 0.845 |
| 6610 | 0.826 | 0.822 | 0.817 | 0.826 |
| 6620 | 0.842 | 0.838 | 0.831 | 0.843 |
| 6630 | 0.838 | 0.833 | 0.833 | 0.840 |
| 6640 | 0.838 | 0.834 | 0.842 | 0.838 |
| 6650 | 0.847 | 0.842 | 0.837 | 0.847 |
| 6660 | 0.838 | 0.834 | 0.825 | 0.840 |
| 6670 | 0.840 | 0.836 | 0.830 | 0.841 |
| 6680 | 0.838 | 0.833 | 0.833 | 0.838 |
| 6690 | 0.853 | 0.849 | 0.852 | 0.852 |
| 6700 | 0.840 | 0.836 | 0.837 | 0.840 |
| 6710 | 0.850 | 0.846 | 0.850 | 0.850 |
| 6720 | 0.839 | 0.835 | 0.837 | 0.840 |
| 6730 | 0.842 | 0.838 | 0.839 | 0.840 |
| 6740 | 0.840 | 0.836 | 0.833 | 0.840 |
| 6750 | 0.829 | 0.824 | 0.825 | 0.830 |
| 6760 | 0.841 | 0.837 | 0.840 | 0.841 |
| 6770 | 0.836 | 0.831 | 0.835 | 0.835 |
| 6780 | 0.828 | 0.823 | 0.828 | 0.827 |
| 6790 | 0.843 | 0.839 | 0.841 | 0.842 |
| 6800 | 0.836 | 0.831 | 0.835 | 0.837 |
| 6810 | 0.838 | 0.834 | 0.830 | 0.838 |
| 6820 | 0.835 | 0.831 | 0.836 | 0.833 |
| 6830 | 0.836 | 0.832 | 0.828 | 0.837 |
| 6840 | 0.838 | 0.834 | 0.834 | 0.839 |
| 6850 | 0.844 | 0.840 | 0.837 | 0.845 |
| 6860 | 0.836 | 0.831 | 0.837 | 0.836 |
| 6870 | 0.841 | 0.837 | 0.825 | 0.843 |
| 6880 | 0.836 | 0.831 | 0.835 | 0.837 |

|      |       |       |       |       |
|------|-------|-------|-------|-------|
| 6890 | 0.822 | 0.817 | 0.824 | 0.823 |
| 6900 | 0.840 | 0.835 | 0.831 | 0.840 |
| 6910 | 0.812 | 0.807 | 0.808 | 0.813 |
| 6920 | 0.840 | 0.835 | 0.837 | 0.841 |
| 6930 | 0.819 | 0.814 | 0.813 | 0.820 |
| 6940 | 0.837 | 0.833 | 0.830 | 0.838 |
| 6950 | 0.838 | 0.834 | 0.829 | 0.839 |
| 6960 | 0.838 | 0.833 | 0.838 | 0.837 |
| 6970 | 0.830 | 0.826 | 0.823 | 0.831 |
| 6980 | 0.831 | 0.826 | 0.823 | 0.832 |
| 6990 | 0.839 | 0.835 | 0.835 | 0.840 |
| 7000 | 0.845 | 0.840 | 0.841 | 0.847 |
| 7010 | 0.833 | 0.828 | 0.824 | 0.834 |
| 7020 | 0.838 | 0.834 | 0.835 | 0.840 |
| 7030 | 0.842 | 0.838 | 0.835 | 0.843 |
| 7040 | 0.840 | 0.835 | 0.827 | 0.840 |
| 7050 | 0.838 | 0.834 | 0.830 | 0.838 |
| 7060 | 0.835 | 0.830 | 0.838 | 0.834 |
| 7070 | 0.832 | 0.828 | 0.821 | 0.831 |
| 7080 | 0.832 | 0.828 | 0.825 | 0.833 |
| 7090 | 0.840 | 0.835 | 0.839 | 0.838 |
| 7100 | 0.828 | 0.823 | 0.820 | 0.829 |
| 7110 | 0.836 | 0.832 | 0.836 | 0.836 |
| 7120 | 0.843 | 0.839 | 0.842 | 0.844 |
| 7130 | 0.837 | 0.833 | 0.830 | 0.837 |
| 7140 | 0.824 | 0.820 | 0.812 | 0.825 |
| 7150 | 0.840 | 0.835 | 0.835 | 0.840 |
| 7160 | 0.839 | 0.835 | 0.831 | 0.840 |
| 7170 | 0.845 | 0.840 | 0.839 | 0.845 |
| 7180 | 0.834 | 0.829 | 0.836 | 0.835 |
| 7190 | 0.832 | 0.828 | 0.822 | 0.833 |
| 7200 | 0.852 | 0.848 | 0.847 | 0.853 |
| 7210 | 0.821 | 0.816 | 0.817 | 0.821 |
| 7220 | 0.843 | 0.839 | 0.830 | 0.843 |
| 7230 | 0.833 | 0.829 | 0.831 | 0.833 |
| 7240 | 0.833 | 0.828 | 0.823 | 0.834 |
| 7250 | 0.843 | 0.839 | 0.843 | 0.843 |
| 7260 | 0.837 | 0.833 | 0.834 | 0.837 |
| 7270 | 0.828 | 0.824 | 0.825 | 0.830 |
| 7280 | 0.842 | 0.838 | 0.838 | 0.843 |
| 7290 | 0.831 | 0.826 | 0.825 | 0.832 |
| 7300 | 0.832 | 0.828 | 0.825 | 0.833 |
| 7310 | 0.839 | 0.835 | 0.827 | 0.839 |

|      |       |       |       |       |
|------|-------|-------|-------|-------|
| 7320 | 0.823 | 0.818 | 0.816 | 0.825 |
| 7330 | 0.834 | 0.829 | 0.842 | 0.834 |
| 7340 | 0.832 | 0.828 | 0.827 | 0.834 |
| 7350 | 0.832 | 0.828 | 0.825 | 0.832 |
| 7360 | 0.828 | 0.823 | 0.818 | 0.830 |
| 7370 | 0.825 | 0.820 | 0.817 | 0.826 |
| 7380 | 0.847 | 0.843 | 0.845 | 0.847 |
| 7390 | 0.830 | 0.826 | 0.825 | 0.831 |
| 7400 | 0.834 | 0.830 | 0.831 | 0.835 |
| 7410 | 0.830 | 0.826 | 0.823 | 0.831 |
| 7420 | 0.824 | 0.819 | 0.826 | 0.825 |
| 7430 | 0.836 | 0.832 | 0.826 | 0.837 |
| 7440 | 0.834 | 0.829 | 0.832 | 0.835 |
| 7450 | 0.841 | 0.837 | 0.846 | 0.840 |
| 7460 | 0.831 | 0.826 | 0.826 | 0.832 |
| 7470 | 0.829 | 0.824 | 0.829 | 0.829 |
| 7480 | 0.829 | 0.824 | 0.819 | 0.829 |
| 7490 | 0.867 | 0.863 | 0.863 | 0.867 |
| 7500 | 0.843 | 0.839 | 0.841 | 0.845 |
| 7510 | 0.834 | 0.830 | 0.831 | 0.835 |
| 7520 | 0.839 | 0.835 | 0.838 | 0.840 |
| 7530 | 0.838 | 0.833 | 0.833 | 0.839 |
| 7540 | 0.841 | 0.837 | 0.826 | 0.842 |
| 7550 | 0.844 | 0.840 | 0.837 | 0.845 |
| 7560 | 0.843 | 0.839 | 0.843 | 0.843 |
| 7570 | 0.823 | 0.818 | 0.817 | 0.822 |
| 7580 | 0.816 | 0.811 | 0.809 | 0.816 |
| 7590 | 0.830 | 0.825 | 0.827 | 0.829 |
| 7600 | 0.839 | 0.835 | 0.833 | 0.839 |
| 7610 | 0.836 | 0.831 | 0.823 | 0.834 |
| 7620 | 0.828 | 0.823 | 0.816 | 0.828 |
| 7630 | 0.836 | 0.831 | 0.824 | 0.836 |
| 7640 | 0.826 | 0.822 | 0.820 | 0.827 |
| 7650 | 0.830 | 0.825 | 0.825 | 0.829 |
| 7660 | 0.834 | 0.830 | 0.835 | 0.835 |
| 7670 | 0.831 | 0.826 | 0.819 | 0.832 |
| 7680 | 0.825 | 0.820 | 0.811 | 0.826 |
| 7690 | 0.836 | 0.831 | 0.823 | 0.837 |
| 7700 | 0.850 | 0.846 | 0.840 | 0.851 |
| 7710 | 0.834 | 0.829 | 0.833 | 0.835 |
| 7720 | 0.834 | 0.829 | 0.827 | 0.834 |
| 7730 | 0.828 | 0.823 | 0.824 | 0.827 |
| 7740 | 0.826 | 0.821 | 0.825 | 0.827 |

|      |       |       |       |       |
|------|-------|-------|-------|-------|
| 7750 | 0.839 | 0.835 | 0.843 | 0.838 |
| 7760 | 0.835 | 0.830 | 0.836 | 0.836 |
| 7770 | 0.832 | 0.828 | 0.819 | 0.833 |
| 7780 | 0.832 | 0.828 | 0.833 | 0.834 |
| 7790 | 0.828 | 0.824 | 0.825 | 0.829 |
| 7800 | 0.831 | 0.826 | 0.827 | 0.832 |
| 7810 | 0.832 | 0.827 | 0.829 | 0.831 |
| 7820 | 0.836 | 0.832 | 0.830 | 0.838 |
| 7830 | 0.842 | 0.838 | 0.841 | 0.842 |
| 7840 | 0.836 | 0.832 | 0.835 | 0.837 |
| 7850 | 0.819 | 0.815 | 0.807 | 0.819 |
| 7860 | 0.836 | 0.831 | 0.832 | 0.837 |
| 7870 | 0.830 | 0.825 | 0.821 | 0.829 |
| 7880 | 0.842 | 0.838 | 0.837 | 0.842 |
| 7890 | 0.834 | 0.830 | 0.826 | 0.834 |
| 7900 | 0.845 | 0.841 | 0.837 | 0.845 |
| 7910 | 0.825 | 0.820 | 0.819 | 0.825 |
| 7920 | 0.833 | 0.828 | 0.826 | 0.832 |
| 7930 | 0.839 | 0.835 | 0.830 | 0.841 |
| 7940 | 0.828 | 0.823 | 0.825 | 0.827 |
| 7950 | 0.841 | 0.837 | 0.838 | 0.840 |
| 7960 | 0.832 | 0.828 | 0.828 | 0.832 |
| 7970 | 0.832 | 0.828 | 0.838 | 0.832 |
| 7980 | 0.832 | 0.827 | 0.823 | 0.831 |
| 7990 | 0.840 | 0.835 | 0.848 | 0.839 |
| 8000 | 0.843 | 0.839 | 0.844 | 0.844 |
| 8010 | 0.824 | 0.819 | 0.816 | 0.823 |
| 8020 | 0.834 | 0.829 | 0.833 | 0.834 |
| 8030 | 0.811 | 0.806 | 0.794 | 0.812 |
| 8040 | 0.839 | 0.835 | 0.836 | 0.839 |
| 8050 | 0.831 | 0.826 | 0.833 | 0.830 |
| 8060 | 0.829 | 0.824 | 0.819 | 0.830 |
| 8070 | 0.847 | 0.843 | 0.840 | 0.847 |
| 8080 | 0.850 | 0.846 | 0.839 | 0.851 |
| 8090 | 0.840 | 0.836 | 0.831 | 0.841 |
| 8100 | 0.819 | 0.815 | 0.820 | 0.818 |
| 8110 | 0.833 | 0.828 | 0.830 | 0.833 |
| 8120 | 0.850 | 0.846 | 0.843 | 0.850 |
| 8130 | 0.853 | 0.849 | 0.845 | 0.854 |
| 8140 | 0.830 | 0.825 | 0.820 | 0.829 |
| 8150 | 0.824 | 0.819 | 0.812 | 0.826 |
| 8160 | 0.842 | 0.837 | 0.837 | 0.842 |
| 8170 | 0.834 | 0.830 | 0.823 | 0.836 |



|      |       |       |       |       |
|------|-------|-------|-------|-------|
| 8180 | 0.838 | 0.834 | 0.828 | 0.840 |
| 8190 | 0.849 | 0.845 | 0.843 | 0.850 |
| 8200 | 0.842 | 0.837 | 0.839 | 0.843 |
| 8210 | 0.826 | 0.822 | 0.821 | 0.827 |
| 8220 | 0.837 | 0.833 | 0.834 | 0.837 |
| 8230 | 0.847 | 0.843 | 0.840 | 0.847 |
| 8240 | 0.847 | 0.843 | 0.838 | 0.849 |
| 8250 | 0.826 | 0.822 | 0.819 | 0.827 |
| 8260 | 0.850 | 0.846 | 0.848 | 0.850 |
| 8270 | 0.846 | 0.842 | 0.840 | 0.847 |
| 8280 | 0.837 | 0.833 | 0.830 | 0.838 |
| 8290 | 0.830 | 0.826 | 0.829 | 0.830 |
| 8300 | 0.833 | 0.829 | 0.827 | 0.832 |
| 8310 | 0.831 | 0.826 | 0.829 | 0.830 |
| 8320 | 0.845 | 0.841 | 0.831 | 0.846 |
| 8330 | 0.838 | 0.833 | 0.831 | 0.837 |
| 8340 | 0.849 | 0.844 | 0.847 | 0.849 |
| 8350 | 0.862 | 0.858 | 0.855 | 0.861 |
| 8360 | 0.840 | 0.836 | 0.843 | 0.841 |
| 8370 | 0.849 | 0.845 | 0.848 | 0.848 |
| 8380 | 0.833 | 0.829 | 0.828 | 0.833 |
| 8390 | 0.848 | 0.844 | 0.843 | 0.848 |
| 8400 | 0.838 | 0.834 | 0.831 | 0.839 |
| 8410 | 0.845 | 0.841 | 0.844 | 0.845 |
| 8420 | 0.832 | 0.828 | 0.825 | 0.834 |
| 8430 | 0.834 | 0.829 | 0.835 | 0.833 |
| 8440 | 0.843 | 0.839 | 0.838 | 0.844 |
| 8450 | 0.828 | 0.824 | 0.825 | 0.829 |
| 8460 | 0.827 | 0.822 | 0.824 | 0.827 |
| 8470 | 0.853 | 0.849 | 0.849 | 0.855 |
| 8480 | 0.838 | 0.834 | 0.835 | 0.839 |
| 8490 | 0.827 | 0.822 | 0.827 | 0.828 |
| 8500 | 0.834 | 0.830 | 0.827 | 0.835 |
| 8510 | 0.823 | 0.819 | 0.818 | 0.825 |
| 8520 | 0.852 | 0.848 | 0.849 | 0.851 |
| 8530 | 0.834 | 0.830 | 0.830 | 0.834 |
| 8540 | 0.851 | 0.847 | 0.851 | 0.851 |
| 8550 | 0.836 | 0.832 | 0.839 | 0.837 |
| 8560 | 0.837 | 0.833 | 0.834 | 0.839 |
| 8570 | 0.837 | 0.833 | 0.836 | 0.838 |
| 8580 | 0.836 | 0.832 | 0.831 | 0.837 |
| 8590 | 0.817 | 0.812 | 0.808 | 0.818 |
| 8600 | 0.836 | 0.832 | 0.831 | 0.838 |

|      |       |       |       |       |
|------|-------|-------|-------|-------|
| 8610 | 0.820 | 0.815 | 0.818 | 0.821 |
| 8620 | 0.823 | 0.819 | 0.829 | 0.823 |
| 8630 | 0.845 | 0.841 | 0.841 | 0.845 |
| 8640 | 0.827 | 0.822 | 0.820 | 0.827 |
| 8650 | 0.821 | 0.817 | 0.811 | 0.823 |
| 8660 | 0.853 | 0.849 | 0.848 | 0.853 |
| 8670 | 0.835 | 0.831 | 0.837 | 0.836 |
| 8680 | 0.844 | 0.839 | 0.843 | 0.844 |
| 8690 | 0.845 | 0.841 | 0.841 | 0.844 |
| 8700 | 0.828 | 0.823 | 0.824 | 0.828 |
| 8710 | 0.828 | 0.824 | 0.822 | 0.828 |
| 8720 | 0.839 | 0.835 | 0.829 | 0.841 |
| 8730 | 0.843 | 0.839 | 0.834 | 0.843 |
| 8740 | 0.834 | 0.829 | 0.825 | 0.835 |
| 8750 | 0.843 | 0.839 | 0.844 | 0.843 |
| 8760 | 0.819 | 0.815 | 0.817 | 0.820 |
| 8770 | 0.848 | 0.844 | 0.847 | 0.848 |
| 8780 | 0.830 | 0.826 | 0.824 | 0.832 |
| 8790 | 0.829 | 0.824 | 0.828 | 0.831 |
| 8800 | 0.845 | 0.840 | 0.843 | 0.844 |
| 8810 | 0.838 | 0.834 | 0.831 | 0.837 |
| 8820 | 0.848 | 0.844 | 0.850 | 0.848 |
| 8830 | 0.847 | 0.842 | 0.842 | 0.846 |
| 8840 | 0.843 | 0.839 | 0.835 | 0.843 |
| 8850 | 0.850 | 0.846 | 0.844 | 0.850 |
| 8860 | 0.845 | 0.840 | 0.835 | 0.845 |
| 8870 | 0.836 | 0.832 | 0.829 | 0.837 |
| 8880 | 0.837 | 0.833 | 0.829 | 0.838 |
| 8890 | 0.847 | 0.843 | 0.841 | 0.846 |
| 8900 | 0.853 | 0.849 | 0.844 | 0.854 |
| 8910 | 0.847 | 0.842 | 0.837 | 0.848 |
| 8920 | 0.846 | 0.842 | 0.842 | 0.846 |
| 8930 | 0.847 | 0.843 | 0.847 | 0.849 |
| 8940 | 0.838 | 0.833 | 0.826 | 0.839 |
| 8950 | 0.834 | 0.830 | 0.832 | 0.835 |

(3) IFS results with RF on the LightGBM feature list

| Number of features | ACC   | MCC   | Macro F1 | Weighted F1 |
|--------------------|-------|-------|----------|-------------|
| 10                 | 0.788 | 0.783 | 0.816    | 0.778       |
| 20                 | 0.911 | 0.909 | 0.926    | 0.909       |
| 30                 | 0.940 | 0.939 | 0.948    | 0.940       |
| 40                 | 0.946 | 0.945 | 0.952    | 0.946       |
| 50                 | 0.954 | 0.953 | 0.958    | 0.954       |

|     |       |       |       |       |
|-----|-------|-------|-------|-------|
| 60  | 0.962 | 0.961 | 0.968 | 0.962 |
| 70  | 0.957 | 0.956 | 0.966 | 0.957 |
| 80  | 0.967 | 0.966 | 0.972 | 0.967 |
| 90  | 0.965 | 0.964 | 0.970 | 0.965 |
| 100 | 0.964 | 0.963 | 0.970 | 0.964 |
| 110 | 0.973 | 0.972 | 0.979 | 0.973 |
| 120 | 0.971 | 0.970 | 0.975 | 0.971 |
| 130 | 0.971 | 0.970 | 0.976 | 0.971 |
| 140 | 0.973 | 0.972 | 0.978 | 0.972 |
| 150 | 0.975 | 0.974 | 0.979 | 0.975 |
| 160 | 0.967 | 0.966 | 0.972 | 0.967 |
| 170 | 0.970 | 0.969 | 0.974 | 0.970 |
| 180 | 0.976 | 0.975 | 0.979 | 0.975 |
| 190 | 0.977 | 0.976 | 0.981 | 0.977 |
| 200 | 0.979 | 0.978 | 0.983 | 0.979 |
| 210 | 0.974 | 0.973 | 0.979 | 0.973 |
| 220 | 0.977 | 0.976 | 0.983 | 0.977 |
| 230 | 0.976 | 0.976 | 0.982 | 0.976 |
| 240 | 0.972 | 0.971 | 0.977 | 0.972 |
| 250 | 0.977 | 0.976 | 0.982 | 0.977 |
| 260 | 0.977 | 0.976 | 0.983 | 0.977 |
| 270 | 0.975 | 0.974 | 0.982 | 0.975 |
| 280 | 0.978 | 0.978 | 0.984 | 0.978 |
| 290 | 0.978 | 0.978 | 0.982 | 0.978 |
| 300 | 0.978 | 0.978 | 0.985 | 0.978 |
| 310 | 0.981 | 0.980 | 0.986 | 0.981 |
| 320 | 0.979 | 0.978 | 0.983 | 0.979 |
| 330 | 0.977 | 0.976 | 0.982 | 0.977 |
| 340 | 0.976 | 0.975 | 0.982 | 0.975 |
| 350 | 0.981 | 0.980 | 0.985 | 0.981 |
| 360 | 0.982 | 0.982 | 0.985 | 0.982 |
| 370 | 0.982 | 0.981 | 0.984 | 0.982 |
| 380 | 0.982 | 0.981 | 0.988 | 0.982 |
| 390 | 0.980 | 0.979 | 0.984 | 0.980 |
| 400 | 0.977 | 0.976 | 0.982 | 0.977 |
| 410 | 0.982 | 0.981 | 0.985 | 0.982 |
| 420 | 0.982 | 0.982 | 0.987 | 0.982 |
| 430 | 0.982 | 0.982 | 0.986 | 0.982 |
| 440 | 0.979 | 0.978 | 0.984 | 0.979 |
| 450 | 0.982 | 0.981 | 0.985 | 0.982 |
| 460 | 0.985 | 0.985 | 0.988 | 0.985 |
| 470 | 0.986 | 0.985 | 0.990 | 0.986 |
| 480 | 0.982 | 0.982 | 0.986 | 0.982 |

|     |       |       |       |       |
|-----|-------|-------|-------|-------|
| 490 | 0.980 | 0.979 | 0.983 | 0.979 |
| 500 | 0.984 | 0.983 | 0.987 | 0.984 |
| 510 | 0.982 | 0.982 | 0.987 | 0.982 |
| 520 | 0.981 | 0.980 | 0.985 | 0.981 |
| 530 | 0.983 | 0.983 | 0.986 | 0.983 |
| 540 | 0.984 | 0.983 | 0.988 | 0.984 |
| 550 | 0.984 | 0.983 | 0.988 | 0.984 |
| 560 | 0.986 | 0.985 | 0.990 | 0.986 |
| 570 | 0.983 | 0.983 | 0.986 | 0.983 |
| 580 | 0.984 | 0.984 | 0.987 | 0.984 |
| 590 | 0.984 | 0.984 | 0.989 | 0.984 |
| 600 | 0.982 | 0.981 | 0.986 | 0.981 |
| 610 | 0.982 | 0.981 | 0.986 | 0.982 |
| 620 | 0.982 | 0.982 | 0.987 | 0.982 |
| 630 | 0.984 | 0.984 | 0.987 | 0.984 |
| 640 | 0.982 | 0.981 | 0.985 | 0.982 |
| 650 | 0.982 | 0.982 | 0.987 | 0.982 |
| 660 | 0.984 | 0.984 | 0.988 | 0.984 |
| 670 | 0.986 | 0.985 | 0.990 | 0.986 |
| 680 | 0.985 | 0.985 | 0.990 | 0.985 |
| 690 | 0.982 | 0.982 | 0.986 | 0.982 |
| 700 | 0.982 | 0.981 | 0.987 | 0.981 |
| 710 | 0.982 | 0.982 | 0.989 | 0.982 |
| 720 | 0.983 | 0.983 | 0.987 | 0.983 |
| 730 | 0.985 | 0.985 | 0.987 | 0.985 |
| 740 | 0.982 | 0.982 | 0.986 | 0.982 |
| 750 | 0.986 | 0.986 | 0.991 | 0.986 |
| 760 | 0.983 | 0.983 | 0.987 | 0.983 |
| 770 | 0.984 | 0.984 | 0.989 | 0.984 |
| 780 | 0.984 | 0.984 | 0.988 | 0.984 |
| 790 | 0.983 | 0.983 | 0.988 | 0.983 |
| 800 | 0.986 | 0.986 | 0.992 | 0.986 |
| 810 | 0.984 | 0.983 | 0.988 | 0.984 |
| 820 | 0.986 | 0.985 | 0.990 | 0.986 |
| 830 | 0.982 | 0.982 | 0.987 | 0.982 |
| 840 | 0.983 | 0.983 | 0.988 | 0.983 |
| 850 | 0.984 | 0.983 | 0.988 | 0.984 |
| 860 | 0.983 | 0.983 | 0.987 | 0.983 |
| 870 | 0.985 | 0.985 | 0.988 | 0.985 |
| 880 | 0.984 | 0.983 | 0.987 | 0.984 |
| 890 | 0.984 | 0.983 | 0.988 | 0.984 |
| 900 | 0.982 | 0.981 | 0.985 | 0.981 |
| 910 | 0.982 | 0.982 | 0.987 | 0.982 |

|      |       |       |       |       |
|------|-------|-------|-------|-------|
| 920  | 0.984 | 0.983 | 0.988 | 0.983 |
| 930  | 0.981 | 0.980 | 0.987 | 0.981 |
| 940  | 0.984 | 0.984 | 0.988 | 0.984 |
| 950  | 0.985 | 0.985 | 0.989 | 0.985 |
| 960  | 0.981 | 0.980 | 0.987 | 0.981 |
| 970  | 0.984 | 0.984 | 0.988 | 0.984 |
| 980  | 0.983 | 0.983 | 0.988 | 0.983 |
| 990  | 0.983 | 0.983 | 0.987 | 0.983 |
| 1000 | 0.983 | 0.983 | 0.988 | 0.983 |
| 1010 | 0.982 | 0.982 | 0.989 | 0.982 |
| 1020 | 0.984 | 0.983 | 0.987 | 0.984 |
| 1030 | 0.984 | 0.984 | 0.987 | 0.984 |
| 1040 | 0.983 | 0.983 | 0.988 | 0.983 |
| 1050 | 0.982 | 0.982 | 0.987 | 0.982 |
| 1060 | 0.986 | 0.985 | 0.989 | 0.986 |
| 1070 | 0.982 | 0.981 | 0.987 | 0.982 |
| 1080 | 0.983 | 0.983 | 0.988 | 0.983 |
| 1090 | 0.984 | 0.984 | 0.989 | 0.984 |
| 1100 | 0.986 | 0.986 | 0.990 | 0.986 |
| 1110 | 0.984 | 0.983 | 0.988 | 0.983 |
| 1120 | 0.983 | 0.983 | 0.989 | 0.983 |
| 1130 | 0.984 | 0.983 | 0.988 | 0.984 |
| 1140 | 0.984 | 0.984 | 0.987 | 0.984 |
| 1150 | 0.984 | 0.983 | 0.988 | 0.983 |
| 1160 | 0.984 | 0.983 | 0.988 | 0.983 |
| 1170 | 0.986 | 0.985 | 0.990 | 0.986 |
| 1180 | 0.982 | 0.982 | 0.987 | 0.982 |
| 1190 | 0.987 | 0.987 | 0.990 | 0.987 |
| 1200 | 0.986 | 0.985 | 0.988 | 0.986 |
| 1210 | 0.984 | 0.984 | 0.988 | 0.984 |
| 1220 | 0.984 | 0.983 | 0.988 | 0.984 |
| 1230 | 0.984 | 0.984 | 0.988 | 0.984 |
| 1240 | 0.986 | 0.985 | 0.990 | 0.986 |
| 1250 | 0.984 | 0.984 | 0.990 | 0.984 |
| 1260 | 0.986 | 0.986 | 0.991 | 0.986 |
| 1270 | 0.984 | 0.984 | 0.989 | 0.984 |
| 1280 | 0.984 | 0.983 | 0.989 | 0.984 |
| 1290 | 0.984 | 0.984 | 0.989 | 0.984 |
| 1300 | 0.986 | 0.985 | 0.991 | 0.986 |
| 1310 | 0.984 | 0.984 | 0.987 | 0.984 |
| 1320 | 0.985 | 0.985 | 0.990 | 0.985 |
| 1330 | 0.986 | 0.985 | 0.989 | 0.986 |
| 1340 | 0.984 | 0.983 | 0.987 | 0.984 |

|      |       |       |       |       |
|------|-------|-------|-------|-------|
| 1350 | 0.986 | 0.986 | 0.989 | 0.987 |
| 1360 | 0.986 | 0.986 | 0.989 | 0.986 |
| 1370 | 0.985 | 0.985 | 0.989 | 0.985 |
| 1380 | 0.986 | 0.985 | 0.988 | 0.986 |
| 1390 | 0.986 | 0.986 | 0.990 | 0.986 |
| 1400 | 0.987 | 0.987 | 0.990 | 0.987 |
| 1410 | 0.982 | 0.981 | 0.986 | 0.981 |
| 1420 | 0.985 | 0.985 | 0.989 | 0.985 |
| 1430 | 0.987 | 0.987 | 0.990 | 0.987 |
| 1440 | 0.987 | 0.987 | 0.990 | 0.987 |
| 1450 | 0.985 | 0.985 | 0.989 | 0.985 |
| 1460 | 0.986 | 0.986 | 0.991 | 0.986 |
| 1470 | 0.988 | 0.988 | 0.991 | 0.988 |
| 1480 | 0.987 | 0.987 | 0.991 | 0.987 |
| 1490 | 0.984 | 0.983 | 0.988 | 0.984 |
| 1500 | 0.986 | 0.985 | 0.990 | 0.986 |
| 1510 | 0.984 | 0.984 | 0.988 | 0.984 |
| 1520 | 0.988 | 0.987 | 0.991 | 0.988 |
| 1530 | 0.986 | 0.985 | 0.988 | 0.986 |
| 1540 | 0.986 | 0.985 | 0.990 | 0.986 |
| 1550 | 0.984 | 0.984 | 0.987 | 0.984 |
| 1560 | 0.985 | 0.985 | 0.988 | 0.985 |
| 1570 | 0.984 | 0.983 | 0.988 | 0.984 |
| 1580 | 0.984 | 0.983 | 0.988 | 0.984 |
| 1590 | 0.988 | 0.987 | 0.991 | 0.988 |
| 1600 | 0.987 | 0.987 | 0.990 | 0.987 |
| 1610 | 0.983 | 0.983 | 0.988 | 0.983 |
| 1620 | 0.986 | 0.985 | 0.990 | 0.986 |
| 1630 | 0.986 | 0.986 | 0.991 | 0.986 |
| 1640 | 0.990 | 0.990 | 0.992 | 0.990 |
| 1650 | 0.986 | 0.986 | 0.990 | 0.986 |
| 1660 | 0.986 | 0.985 | 0.989 | 0.986 |
| 1670 | 0.989 | 0.989 | 0.991 | 0.989 |
| 1680 | 0.984 | 0.983 | 0.987 | 0.983 |
| 1690 | 0.986 | 0.985 | 0.988 | 0.986 |
| 1700 | 0.984 | 0.983 | 0.988 | 0.984 |
| 1710 | 0.982 | 0.982 | 0.986 | 0.982 |
| 1720 | 0.984 | 0.984 | 0.989 | 0.984 |
| 1730 | 0.986 | 0.985 | 0.990 | 0.986 |
| 1740 | 0.986 | 0.985 | 0.990 | 0.985 |
| 1750 | 0.986 | 0.985 | 0.988 | 0.986 |
| 1760 | 0.988 | 0.987 | 0.991 | 0.988 |
| 1770 | 0.986 | 0.985 | 0.990 | 0.986 |

|      |       |       |       |       |
|------|-------|-------|-------|-------|
| 1780 | 0.984 | 0.983 | 0.987 | 0.984 |
| 1790 | 0.984 | 0.984 | 0.989 | 0.984 |
| 1800 | 0.983 | 0.983 | 0.988 | 0.983 |
| 1810 | 0.986 | 0.986 | 0.991 | 0.986 |
| 1820 | 0.988 | 0.987 | 0.990 | 0.988 |
| 1830 | 0.989 | 0.989 | 0.992 | 0.989 |
| 1840 | 0.986 | 0.986 | 0.990 | 0.986 |
| 1850 | 0.984 | 0.984 | 0.988 | 0.984 |
| 1860 | 0.986 | 0.986 | 0.989 | 0.986 |
| 1870 | 0.984 | 0.983 | 0.988 | 0.984 |
| 1880 | 0.986 | 0.985 | 0.989 | 0.986 |
| 1890 | 0.984 | 0.983 | 0.989 | 0.984 |
| 1900 | 0.987 | 0.987 | 0.991 | 0.987 |
| 1910 | 0.986 | 0.985 | 0.989 | 0.985 |
| 1920 | 0.982 | 0.981 | 0.986 | 0.982 |
| 1930 | 0.986 | 0.986 | 0.990 | 0.986 |
| 1940 | 0.987 | 0.987 | 0.990 | 0.987 |
| 1950 | 0.986 | 0.986 | 0.990 | 0.986 |
| 1960 | 0.987 | 0.987 | 0.991 | 0.987 |
| 1970 | 0.990 | 0.990 | 0.993 | 0.990 |
| 1980 | 0.988 | 0.987 | 0.991 | 0.988 |
| 1990 | 0.987 | 0.987 | 0.991 | 0.987 |
| 2000 | 0.984 | 0.983 | 0.988 | 0.983 |
| 2010 | 0.988 | 0.988 | 0.991 | 0.988 |
| 2020 | 0.984 | 0.983 | 0.987 | 0.984 |
| 2030 | 0.985 | 0.985 | 0.989 | 0.985 |
| 2040 | 0.987 | 0.987 | 0.990 | 0.987 |
| 2050 | 0.984 | 0.983 | 0.989 | 0.983 |
| 2060 | 0.988 | 0.987 | 0.990 | 0.988 |
| 2070 | 0.987 | 0.987 | 0.989 | 0.987 |
| 2080 | 0.987 | 0.987 | 0.992 | 0.987 |
| 2090 | 0.986 | 0.986 | 0.990 | 0.986 |
| 2100 | 0.985 | 0.985 | 0.990 | 0.985 |
| 2110 | 0.986 | 0.986 | 0.990 | 0.986 |
| 2120 | 0.983 | 0.983 | 0.988 | 0.983 |
| 2130 | 0.988 | 0.987 | 0.992 | 0.988 |
| 2140 | 0.988 | 0.988 | 0.991 | 0.988 |
| 2150 | 0.987 | 0.987 | 0.991 | 0.987 |
| 2160 | 0.986 | 0.985 | 0.989 | 0.986 |
| 2170 | 0.988 | 0.987 | 0.990 | 0.988 |
| 2180 | 0.988 | 0.987 | 0.991 | 0.988 |
| 2190 | 0.984 | 0.983 | 0.988 | 0.984 |
| 2200 | 0.986 | 0.985 | 0.989 | 0.986 |

|      |       |       |       |       |
|------|-------|-------|-------|-------|
| 2210 | 0.986 | 0.986 | 0.989 | 0.986 |
| 2220 | 0.988 | 0.987 | 0.991 | 0.988 |
| 2230 | 0.987 | 0.987 | 0.991 | 0.987 |
| 2240 | 0.988 | 0.987 | 0.990 | 0.988 |
| 2250 | 0.990 | 0.990 | 0.993 | 0.990 |
| 2260 | 0.986 | 0.986 | 0.989 | 0.986 |
| 2270 | 0.986 | 0.985 | 0.989 | 0.986 |
| 2280 | 0.987 | 0.987 | 0.991 | 0.987 |
| 2290 | 0.987 | 0.987 | 0.989 | 0.987 |
| 2300 | 0.988 | 0.987 | 0.992 | 0.988 |
| 2310 | 0.990 | 0.990 | 0.993 | 0.990 |
| 2320 | 0.986 | 0.986 | 0.990 | 0.986 |
| 2330 | 0.985 | 0.985 | 0.989 | 0.985 |
| 2340 | 0.987 | 0.987 | 0.990 | 0.987 |
| 2350 | 0.985 | 0.985 | 0.990 | 0.985 |
| 2360 | 0.989 | 0.989 | 0.991 | 0.989 |
| 2370 | 0.988 | 0.988 | 0.991 | 0.988 |
| 2380 | 0.988 | 0.987 | 0.991 | 0.988 |
| 2390 | 0.985 | 0.985 | 0.988 | 0.985 |
| 2400 | 0.986 | 0.986 | 0.990 | 0.986 |
| 2410 | 0.984 | 0.984 | 0.988 | 0.984 |
| 2420 | 0.984 | 0.984 | 0.989 | 0.984 |
| 2430 | 0.984 | 0.983 | 0.989 | 0.983 |
| 2440 | 0.984 | 0.984 | 0.988 | 0.984 |
| 2450 | 0.981 | 0.980 | 0.985 | 0.981 |
| 2460 | 0.986 | 0.986 | 0.990 | 0.986 |
| 2470 | 0.988 | 0.987 | 0.990 | 0.988 |
| 2480 | 0.988 | 0.987 | 0.991 | 0.988 |
| 2490 | 0.986 | 0.985 | 0.989 | 0.986 |
| 2500 | 0.985 | 0.985 | 0.988 | 0.985 |
| 2510 | 0.985 | 0.985 | 0.987 | 0.985 |
| 2520 | 0.984 | 0.983 | 0.988 | 0.983 |
| 2530 | 0.984 | 0.984 | 0.988 | 0.984 |
| 2540 | 0.985 | 0.985 | 0.989 | 0.985 |
| 2550 | 0.982 | 0.981 | 0.987 | 0.981 |
| 2560 | 0.985 | 0.985 | 0.989 | 0.985 |
| 2570 | 0.988 | 0.987 | 0.990 | 0.988 |
| 2580 | 0.982 | 0.981 | 0.988 | 0.982 |
| 2590 | 0.986 | 0.986 | 0.991 | 0.986 |
| 2600 | 0.987 | 0.987 | 0.989 | 0.987 |
| 2610 | 0.989 | 0.989 | 0.991 | 0.989 |
| 2620 | 0.988 | 0.988 | 0.991 | 0.988 |
| 2630 | 0.985 | 0.985 | 0.988 | 0.985 |



|      |       |       |       |       |
|------|-------|-------|-------|-------|
| 2640 | 0.988 | 0.988 | 0.992 | 0.988 |
| 2650 | 0.986 | 0.985 | 0.988 | 0.986 |
| 2660 | 0.985 | 0.985 | 0.989 | 0.985 |
| 2670 | 0.986 | 0.986 | 0.989 | 0.986 |
| 2680 | 0.988 | 0.987 | 0.992 | 0.988 |
| 2690 | 0.988 | 0.988 | 0.992 | 0.988 |
| 2700 | 0.986 | 0.985 | 0.989 | 0.986 |
| 2710 | 0.986 | 0.986 | 0.989 | 0.986 |
| 2720 | 0.989 | 0.989 | 0.993 | 0.989 |
| 2730 | 0.982 | 0.981 | 0.985 | 0.981 |
| 2740 | 0.986 | 0.986 | 0.990 | 0.986 |
| 2750 | 0.988 | 0.988 | 0.992 | 0.988 |
| 2760 | 0.984 | 0.984 | 0.989 | 0.984 |
| 2770 | 0.988 | 0.988 | 0.992 | 0.988 |
| 2780 | 0.988 | 0.987 | 0.991 | 0.988 |
| 2790 | 0.982 | 0.982 | 0.987 | 0.982 |
| 2800 | 0.986 | 0.985 | 0.988 | 0.986 |
| 2810 | 0.987 | 0.987 | 0.990 | 0.987 |
| 2820 | 0.986 | 0.986 | 0.991 | 0.986 |
| 2830 | 0.986 | 0.985 | 0.988 | 0.986 |
| 2840 | 0.985 | 0.985 | 0.988 | 0.985 |
| 2850 | 0.985 | 0.985 | 0.989 | 0.985 |
| 2860 | 0.986 | 0.986 | 0.990 | 0.986 |
| 2870 | 0.988 | 0.987 | 0.991 | 0.988 |
| 2880 | 0.985 | 0.985 | 0.988 | 0.985 |
| 2890 | 0.988 | 0.988 | 0.991 | 0.988 |
| 2900 | 0.982 | 0.982 | 0.987 | 0.982 |
| 2910 | 0.986 | 0.985 | 0.990 | 0.986 |
| 2920 | 0.985 | 0.985 | 0.988 | 0.985 |
| 2930 | 0.984 | 0.984 | 0.989 | 0.984 |
| 2940 | 0.981 | 0.980 | 0.986 | 0.981 |
| 2950 | 0.982 | 0.981 | 0.987 | 0.981 |
| 2960 | 0.982 | 0.981 | 0.987 | 0.981 |
| 2970 | 0.982 | 0.982 | 0.987 | 0.982 |
| 2980 | 0.986 | 0.986 | 0.990 | 0.986 |
| 2990 | 0.986 | 0.985 | 0.990 | 0.986 |
| 3000 | 0.984 | 0.984 | 0.988 | 0.984 |
| 3010 | 0.986 | 0.986 | 0.989 | 0.986 |
| 3020 | 0.986 | 0.985 | 0.990 | 0.986 |
| 3030 | 0.988 | 0.987 | 0.991 | 0.988 |
| 3040 | 0.983 | 0.983 | 0.987 | 0.983 |
| 3050 | 0.985 | 0.985 | 0.987 | 0.985 |
| 3060 | 0.984 | 0.984 | 0.989 | 0.984 |

|      |       |       |       |       |
|------|-------|-------|-------|-------|
| 3070 | 0.982 | 0.982 | 0.988 | 0.982 |
| 3080 | 0.986 | 0.986 | 0.989 | 0.986 |
| 3090 | 0.988 | 0.987 | 0.991 | 0.988 |
| 3100 | 0.986 | 0.986 | 0.990 | 0.986 |
| 3110 | 0.986 | 0.985 | 0.989 | 0.986 |
| 3120 | 0.984 | 0.984 | 0.990 | 0.984 |
| 3130 | 0.986 | 0.985 | 0.990 | 0.986 |
| 3140 | 0.986 | 0.986 | 0.989 | 0.986 |
| 3150 | 0.984 | 0.983 | 0.986 | 0.984 |
| 3160 | 0.984 | 0.984 | 0.988 | 0.984 |
| 3170 | 0.984 | 0.983 | 0.988 | 0.984 |
| 3180 | 0.986 | 0.986 | 0.989 | 0.986 |
| 3190 | 0.984 | 0.984 | 0.989 | 0.984 |
| 3200 | 0.986 | 0.985 | 0.990 | 0.986 |
| 3210 | 0.985 | 0.985 | 0.989 | 0.985 |
| 3220 | 0.987 | 0.987 | 0.991 | 0.987 |
| 3230 | 0.987 | 0.987 | 0.991 | 0.987 |
| 3240 | 0.985 | 0.985 | 0.990 | 0.985 |
| 3250 | 0.986 | 0.986 | 0.991 | 0.986 |
| 3260 | 0.986 | 0.986 | 0.991 | 0.986 |
| 3270 | 0.980 | 0.979 | 0.982 | 0.979 |
| 3280 | 0.980 | 0.980 | 0.985 | 0.980 |
| 3290 | 0.985 | 0.985 | 0.989 | 0.985 |
| 3300 | 0.984 | 0.984 | 0.988 | 0.984 |
| 3310 | 0.986 | 0.985 | 0.990 | 0.986 |
| 3320 | 0.988 | 0.988 | 0.992 | 0.988 |
| 3330 | 0.986 | 0.985 | 0.989 | 0.986 |
| 3340 | 0.984 | 0.984 | 0.989 | 0.984 |
| 3350 | 0.987 | 0.987 | 0.990 | 0.987 |
| 3360 | 0.984 | 0.983 | 0.987 | 0.983 |
| 3370 | 0.983 | 0.983 | 0.989 | 0.983 |
| 3380 | 0.986 | 0.986 | 0.991 | 0.986 |
| 3390 | 0.986 | 0.986 | 0.990 | 0.986 |
| 3400 | 0.982 | 0.981 | 0.986 | 0.982 |
| 3410 | 0.985 | 0.985 | 0.988 | 0.985 |
| 3420 | 0.985 | 0.985 | 0.988 | 0.985 |
| 3430 | 0.988 | 0.987 | 0.991 | 0.988 |
| 3440 | 0.989 | 0.989 | 0.992 | 0.989 |
| 3450 | 0.984 | 0.983 | 0.987 | 0.984 |
| 3460 | 0.984 | 0.983 | 0.988 | 0.984 |
| 3470 | 0.984 | 0.984 | 0.989 | 0.984 |
| 3480 | 0.984 | 0.984 | 0.988 | 0.984 |
| 3490 | 0.981 | 0.980 | 0.986 | 0.981 |

|      |       |       |       |       |
|------|-------|-------|-------|-------|
| 3500 | 0.984 | 0.984 | 0.988 | 0.984 |
| 3510 | 0.982 | 0.982 | 0.988 | 0.982 |
| 3520 | 0.986 | 0.986 | 0.990 | 0.986 |
| 3530 | 0.985 | 0.985 | 0.988 | 0.985 |
| 3540 | 0.986 | 0.985 | 0.988 | 0.986 |
| 3550 | 0.986 | 0.986 | 0.990 | 0.986 |
| 3560 | 0.987 | 0.987 | 0.991 | 0.987 |
| 3570 | 0.984 | 0.984 | 0.988 | 0.984 |
| 3580 | 0.984 | 0.983 | 0.987 | 0.984 |
| 3590 | 0.982 | 0.981 | 0.985 | 0.981 |
| 3600 | 0.988 | 0.987 | 0.991 | 0.988 |
| 3610 | 0.984 | 0.984 | 0.989 | 0.984 |
| 3620 | 0.984 | 0.983 | 0.986 | 0.984 |
| 3630 | 0.985 | 0.985 | 0.991 | 0.985 |
| 3640 | 0.984 | 0.984 | 0.989 | 0.984 |
| 3650 | 0.987 | 0.987 | 0.990 | 0.987 |
| 3660 | 0.985 | 0.985 | 0.989 | 0.985 |
| 3670 | 0.986 | 0.985 | 0.989 | 0.986 |
| 3680 | 0.983 | 0.983 | 0.989 | 0.983 |
| 3690 | 0.980 | 0.979 | 0.985 | 0.979 |
| 3700 | 0.985 | 0.985 | 0.989 | 0.985 |
| 3710 | 0.985 | 0.985 | 0.988 | 0.985 |
| 3720 | 0.981 | 0.980 | 0.985 | 0.981 |
| 3730 | 0.984 | 0.983 | 0.989 | 0.984 |
| 3740 | 0.984 | 0.984 | 0.988 | 0.984 |
| 3750 | 0.983 | 0.983 | 0.988 | 0.983 |
| 3760 | 0.986 | 0.985 | 0.988 | 0.986 |
| 3770 | 0.985 | 0.985 | 0.988 | 0.985 |
| 3780 | 0.988 | 0.987 | 0.991 | 0.988 |
| 3790 | 0.985 | 0.985 | 0.989 | 0.985 |
| 3800 | 0.983 | 0.983 | 0.988 | 0.983 |
| 3810 | 0.984 | 0.984 | 0.988 | 0.984 |
| 3820 | 0.986 | 0.985 | 0.991 | 0.986 |
| 3830 | 0.984 | 0.984 | 0.988 | 0.984 |
| 3840 | 0.986 | 0.985 | 0.990 | 0.986 |
| 3850 | 0.982 | 0.981 | 0.985 | 0.981 |
| 3860 | 0.986 | 0.986 | 0.990 | 0.986 |
| 3870 | 0.988 | 0.987 | 0.991 | 0.988 |
| 3880 | 0.985 | 0.985 | 0.989 | 0.985 |
| 3890 | 0.985 | 0.985 | 0.988 | 0.985 |
| 3900 | 0.984 | 0.984 | 0.988 | 0.984 |
| 3910 | 0.984 | 0.984 | 0.988 | 0.984 |
| 3920 | 0.985 | 0.985 | 0.987 | 0.985 |

|      |       |       |       |       |
|------|-------|-------|-------|-------|
| 3930 | 0.984 | 0.983 | 0.987 | 0.984 |
| 3940 | 0.987 | 0.987 | 0.989 | 0.987 |
| 3950 | 0.984 | 0.984 | 0.989 | 0.984 |
| 3960 | 0.984 | 0.983 | 0.988 | 0.984 |
| 3970 | 0.984 | 0.983 | 0.988 | 0.984 |
| 3980 | 0.986 | 0.985 | 0.989 | 0.986 |
| 3990 | 0.984 | 0.984 | 0.988 | 0.984 |
| 4000 | 0.984 | 0.984 | 0.988 | 0.984 |
| 4010 | 0.985 | 0.985 | 0.990 | 0.985 |
| 4020 | 0.982 | 0.982 | 0.987 | 0.982 |
| 4030 | 0.987 | 0.987 | 0.989 | 0.987 |
| 4040 | 0.984 | 0.984 | 0.989 | 0.984 |
| 4050 | 0.982 | 0.981 | 0.988 | 0.981 |
| 4060 | 0.986 | 0.985 | 0.989 | 0.986 |
| 4070 | 0.986 | 0.985 | 0.989 | 0.986 |
| 4080 | 0.982 | 0.982 | 0.987 | 0.982 |
| 4090 | 0.986 | 0.985 | 0.990 | 0.986 |
| 4100 | 0.984 | 0.983 | 0.989 | 0.983 |
| 4110 | 0.982 | 0.982 | 0.986 | 0.982 |
| 4120 | 0.985 | 0.985 | 0.989 | 0.985 |
| 4130 | 0.984 | 0.983 | 0.987 | 0.984 |
| 4140 | 0.984 | 0.983 | 0.989 | 0.984 |
| 4150 | 0.988 | 0.987 | 0.990 | 0.988 |
| 4160 | 0.986 | 0.986 | 0.990 | 0.986 |
| 4170 | 0.982 | 0.982 | 0.987 | 0.982 |
| 4180 | 0.984 | 0.984 | 0.987 | 0.984 |
| 4190 | 0.986 | 0.985 | 0.987 | 0.986 |
| 4200 | 0.984 | 0.984 | 0.988 | 0.984 |
| 4210 | 0.986 | 0.985 | 0.989 | 0.986 |
| 4220 | 0.986 | 0.986 | 0.989 | 0.986 |
| 4230 | 0.986 | 0.986 | 0.990 | 0.986 |
| 4240 | 0.986 | 0.986 | 0.991 | 0.986 |
| 4250 | 0.988 | 0.987 | 0.991 | 0.988 |
| 4260 | 0.986 | 0.986 | 0.989 | 0.986 |
| 4270 | 0.985 | 0.985 | 0.988 | 0.985 |
| 4280 | 0.984 | 0.984 | 0.989 | 0.984 |
| 4290 | 0.984 | 0.984 | 0.987 | 0.984 |
| 4300 | 0.986 | 0.986 | 0.989 | 0.986 |
| 4310 | 0.984 | 0.984 | 0.988 | 0.984 |
| 4320 | 0.986 | 0.986 | 0.989 | 0.986 |
| 4330 | 0.984 | 0.984 | 0.988 | 0.984 |
| 4340 | 0.985 | 0.985 | 0.988 | 0.985 |
| 4350 | 0.984 | 0.984 | 0.988 | 0.984 |

|      |       |       |       |       |
|------|-------|-------|-------|-------|
| 4360 | 0.981 | 0.980 | 0.984 | 0.981 |
| 4370 | 0.984 | 0.983 | 0.987 | 0.983 |
| 4380 | 0.985 | 0.985 | 0.988 | 0.985 |
| 4390 | 0.984 | 0.984 | 0.989 | 0.984 |
| 4400 | 0.986 | 0.986 | 0.989 | 0.987 |
| 4410 | 0.984 | 0.983 | 0.986 | 0.984 |
| 4420 | 0.986 | 0.985 | 0.988 | 0.986 |
| 4430 | 0.986 | 0.986 | 0.989 | 0.986 |
| 4440 | 0.985 | 0.985 | 0.989 | 0.985 |
| 4450 | 0.985 | 0.985 | 0.988 | 0.985 |
| 4460 | 0.982 | 0.982 | 0.987 | 0.982 |
| 4470 | 0.987 | 0.987 | 0.991 | 0.987 |
| 4480 | 0.986 | 0.986 | 0.989 | 0.986 |
| 4490 | 0.986 | 0.985 | 0.988 | 0.986 |
| 4500 | 0.983 | 0.983 | 0.986 | 0.983 |
| 4510 | 0.984 | 0.984 | 0.988 | 0.984 |
| 4520 | 0.990 | 0.990 | 0.993 | 0.991 |
| 4530 | 0.983 | 0.983 | 0.988 | 0.983 |
| 4540 | 0.985 | 0.985 | 0.987 | 0.985 |
| 4550 | 0.983 | 0.983 | 0.986 | 0.983 |
| 4560 | 0.985 | 0.985 | 0.988 | 0.985 |
| 4570 | 0.984 | 0.983 | 0.987 | 0.984 |
| 4580 | 0.984 | 0.983 | 0.988 | 0.983 |
| 4590 | 0.986 | 0.986 | 0.989 | 0.986 |
| 4600 | 0.985 | 0.985 | 0.988 | 0.985 |
| 4610 | 0.986 | 0.985 | 0.989 | 0.986 |
| 4620 | 0.987 | 0.987 | 0.992 | 0.987 |
| 4630 | 0.986 | 0.986 | 0.989 | 0.986 |
| 4640 | 0.984 | 0.983 | 0.988 | 0.983 |
| 4650 | 0.986 | 0.986 | 0.989 | 0.986 |
| 4660 | 0.986 | 0.986 | 0.989 | 0.986 |
| 4670 | 0.988 | 0.987 | 0.991 | 0.988 |
| 4680 | 0.990 | 0.990 | 0.993 | 0.990 |
| 4690 | 0.986 | 0.986 | 0.990 | 0.986 |
| 4700 | 0.986 | 0.985 | 0.989 | 0.986 |
| 4710 | 0.984 | 0.983 | 0.989 | 0.984 |
| 4720 | 0.987 | 0.987 | 0.991 | 0.987 |
| 4730 | 0.983 | 0.983 | 0.988 | 0.983 |
| 4740 | 0.983 | 0.983 | 0.986 | 0.983 |
| 4750 | 0.984 | 0.984 | 0.987 | 0.984 |
| 4760 | 0.986 | 0.985 | 0.989 | 0.986 |
| 4770 | 0.988 | 0.988 | 0.992 | 0.988 |
| 4780 | 0.984 | 0.983 | 0.988 | 0.984 |

|      |       |       |       |       |
|------|-------|-------|-------|-------|
| 4790 | 0.986 | 0.985 | 0.988 | 0.986 |
| 4800 | 0.986 | 0.986 | 0.990 | 0.986 |
| 4810 | 0.984 | 0.983 | 0.989 | 0.984 |
| 4820 | 0.986 | 0.985 | 0.988 | 0.986 |
| 4830 | 0.983 | 0.983 | 0.988 | 0.983 |
| 4840 | 0.984 | 0.984 | 0.987 | 0.984 |
| 4850 | 0.984 | 0.984 | 0.988 | 0.984 |
| 4860 | 0.984 | 0.984 | 0.988 | 0.984 |
| 4870 | 0.986 | 0.986 | 0.988 | 0.986 |
| 4880 | 0.986 | 0.985 | 0.989 | 0.986 |
| 4890 | 0.986 | 0.986 | 0.989 | 0.986 |
| 4900 | 0.984 | 0.983 | 0.989 | 0.983 |
| 4910 | 0.987 | 0.987 | 0.990 | 0.987 |
| 4920 | 0.983 | 0.983 | 0.986 | 0.983 |
| 4930 | 0.986 | 0.986 | 0.989 | 0.986 |
| 4940 | 0.984 | 0.984 | 0.988 | 0.984 |
| 4950 | 0.987 | 0.987 | 0.989 | 0.987 |
| 4960 | 0.984 | 0.984 | 0.988 | 0.984 |
| 4970 | 0.987 | 0.987 | 0.991 | 0.987 |
| 4980 | 0.986 | 0.986 | 0.990 | 0.986 |
| 4990 | 0.984 | 0.984 | 0.988 | 0.984 |
| 5000 | 0.982 | 0.982 | 0.987 | 0.982 |
| 5010 | 0.986 | 0.986 | 0.990 | 0.986 |
| 5020 | 0.985 | 0.985 | 0.988 | 0.985 |
| 5030 | 0.986 | 0.985 | 0.990 | 0.986 |
| 5040 | 0.986 | 0.985 | 0.988 | 0.986 |
| 5050 | 0.987 | 0.987 | 0.991 | 0.987 |
| 5060 | 0.986 | 0.986 | 0.990 | 0.986 |
| 5070 | 0.987 | 0.987 | 0.990 | 0.987 |
| 5080 | 0.982 | 0.982 | 0.987 | 0.982 |
| 5090 | 0.985 | 0.985 | 0.989 | 0.985 |
| 5100 | 0.986 | 0.986 | 0.990 | 0.986 |
| 5110 | 0.985 | 0.985 | 0.989 | 0.985 |
| 5120 | 0.985 | 0.985 | 0.988 | 0.985 |
| 5130 | 0.984 | 0.983 | 0.988 | 0.984 |
| 5140 | 0.985 | 0.985 | 0.989 | 0.985 |
| 5150 | 0.984 | 0.984 | 0.989 | 0.984 |
| 5160 | 0.986 | 0.986 | 0.989 | 0.986 |
| 5170 | 0.987 | 0.987 | 0.990 | 0.987 |
| 5180 | 0.984 | 0.984 | 0.988 | 0.984 |
| 5190 | 0.988 | 0.988 | 0.991 | 0.988 |
| 5200 | 0.985 | 0.985 | 0.987 | 0.985 |
| 5210 | 0.986 | 0.985 | 0.989 | 0.986 |

|      |       |       |       |       |
|------|-------|-------|-------|-------|
| 5220 | 0.986 | 0.985 | 0.990 | 0.986 |
| 5230 | 0.985 | 0.985 | 0.988 | 0.985 |
| 5240 | 0.984 | 0.984 | 0.988 | 0.984 |
| 5250 | 0.986 | 0.985 | 0.989 | 0.986 |
| 5260 | 0.985 | 0.985 | 0.989 | 0.985 |
| 5270 | 0.984 | 0.983 | 0.988 | 0.983 |
| 5280 | 0.986 | 0.986 | 0.991 | 0.986 |
| 5290 | 0.984 | 0.983 | 0.989 | 0.983 |
| 5300 | 0.982 | 0.982 | 0.987 | 0.982 |
| 5310 | 0.988 | 0.987 | 0.991 | 0.988 |
| 5320 | 0.984 | 0.984 | 0.988 | 0.984 |
| 5330 | 0.984 | 0.984 | 0.988 | 0.984 |
| 5340 | 0.987 | 0.987 | 0.989 | 0.987 |
| 5350 | 0.986 | 0.986 | 0.989 | 0.986 |
| 5360 | 0.986 | 0.986 | 0.990 | 0.986 |
| 5370 | 0.985 | 0.985 | 0.989 | 0.985 |
| 5380 | 0.984 | 0.984 | 0.988 | 0.984 |
| 5390 | 0.986 | 0.986 | 0.989 | 0.986 |
| 5400 | 0.984 | 0.984 | 0.987 | 0.984 |
| 5410 | 0.986 | 0.985 | 0.989 | 0.986 |
| 5420 | 0.986 | 0.985 | 0.988 | 0.986 |
| 5430 | 0.983 | 0.983 | 0.985 | 0.983 |
| 5440 | 0.983 | 0.983 | 0.987 | 0.983 |
| 5450 | 0.984 | 0.984 | 0.987 | 0.984 |
| 5460 | 0.986 | 0.985 | 0.988 | 0.986 |
| 5470 | 0.982 | 0.982 | 0.987 | 0.982 |
| 5480 | 0.985 | 0.985 | 0.988 | 0.985 |
| 5490 | 0.983 | 0.983 | 0.988 | 0.983 |
| 5500 | 0.984 | 0.984 | 0.989 | 0.984 |
| 5510 | 0.986 | 0.986 | 0.988 | 0.986 |
| 5520 | 0.986 | 0.986 | 0.989 | 0.986 |
| 5530 | 0.988 | 0.987 | 0.991 | 0.988 |
| 5540 | 0.985 | 0.985 | 0.990 | 0.985 |
| 5550 | 0.986 | 0.985 | 0.989 | 0.986 |
| 5560 | 0.985 | 0.985 | 0.989 | 0.985 |
| 5570 | 0.985 | 0.985 | 0.988 | 0.985 |
| 5580 | 0.983 | 0.983 | 0.988 | 0.983 |
| 5590 | 0.984 | 0.984 | 0.988 | 0.984 |
| 5600 | 0.985 | 0.985 | 0.987 | 0.985 |
| 5610 | 0.984 | 0.984 | 0.987 | 0.984 |
| 5620 | 0.985 | 0.985 | 0.988 | 0.985 |
| 5630 | 0.984 | 0.984 | 0.988 | 0.984 |
| 5640 | 0.986 | 0.985 | 0.989 | 0.986 |

|      |       |       |       |       |
|------|-------|-------|-------|-------|
| 5650 | 0.986 | 0.985 | 0.988 | 0.986 |
| 5660 | 0.985 | 0.985 | 0.989 | 0.985 |
| 5670 | 0.985 | 0.985 | 0.989 | 0.985 |
| 5680 | 0.984 | 0.983 | 0.988 | 0.984 |
| 5690 | 0.988 | 0.987 | 0.991 | 0.988 |
| 5700 | 0.986 | 0.985 | 0.988 | 0.986 |
| 5710 | 0.986 | 0.986 | 0.989 | 0.986 |
| 5720 | 0.984 | 0.983 | 0.989 | 0.983 |
| 5730 | 0.984 | 0.984 | 0.988 | 0.984 |
| 5740 | 0.986 | 0.985 | 0.988 | 0.986 |
| 5750 | 0.987 | 0.987 | 0.990 | 0.987 |
| 5760 | 0.984 | 0.983 | 0.988 | 0.984 |
| 5770 | 0.984 | 0.983 | 0.987 | 0.983 |
| 5780 | 0.984 | 0.984 | 0.988 | 0.984 |
| 5790 | 0.984 | 0.983 | 0.988 | 0.983 |
| 5800 | 0.982 | 0.981 | 0.985 | 0.981 |
| 5810 | 0.986 | 0.986 | 0.989 | 0.986 |
| 5820 | 0.984 | 0.983 | 0.987 | 0.984 |
| 5830 | 0.985 | 0.985 | 0.988 | 0.985 |
| 5840 | 0.986 | 0.985 | 0.989 | 0.985 |
| 5850 | 0.984 | 0.984 | 0.988 | 0.984 |
| 5860 | 0.982 | 0.981 | 0.985 | 0.981 |
| 5870 | 0.984 | 0.984 | 0.989 | 0.984 |
| 5880 | 0.986 | 0.985 | 0.988 | 0.986 |
| 5890 | 0.982 | 0.982 | 0.986 | 0.982 |
| 5900 | 0.986 | 0.986 | 0.990 | 0.986 |
| 5910 | 0.984 | 0.984 | 0.988 | 0.984 |
| 5920 | 0.982 | 0.982 | 0.988 | 0.982 |
| 5930 | 0.986 | 0.985 | 0.988 | 0.986 |
| 5940 | 0.988 | 0.987 | 0.990 | 0.988 |
| 5950 | 0.984 | 0.983 | 0.989 | 0.984 |
| 5960 | 0.982 | 0.982 | 0.987 | 0.982 |
| 5970 | 0.983 | 0.983 | 0.987 | 0.983 |
| 5980 | 0.987 | 0.987 | 0.991 | 0.987 |
| 5990 | 0.984 | 0.984 | 0.988 | 0.984 |
| 6000 | 0.981 | 0.980 | 0.985 | 0.981 |
| 6010 | 0.985 | 0.985 | 0.988 | 0.985 |
| 6020 | 0.985 | 0.985 | 0.988 | 0.985 |
| 6030 | 0.984 | 0.984 | 0.987 | 0.984 |
| 6040 | 0.988 | 0.987 | 0.991 | 0.988 |
| 6050 | 0.984 | 0.983 | 0.988 | 0.984 |
| 6060 | 0.984 | 0.984 | 0.988 | 0.984 |
| 6070 | 0.983 | 0.983 | 0.988 | 0.983 |



|      |       |       |       |       |
|------|-------|-------|-------|-------|
| 6080 | 0.984 | 0.984 | 0.989 | 0.984 |
| 6090 | 0.984 | 0.983 | 0.989 | 0.984 |
| 6100 | 0.981 | 0.980 | 0.984 | 0.981 |
| 6110 | 0.985 | 0.985 | 0.988 | 0.985 |
| 6120 | 0.986 | 0.986 | 0.990 | 0.986 |
| 6130 | 0.981 | 0.980 | 0.985 | 0.981 |
| 6140 | 0.987 | 0.987 | 0.990 | 0.987 |
| 6150 | 0.986 | 0.986 | 0.990 | 0.986 |
| 6160 | 0.984 | 0.984 | 0.989 | 0.984 |
| 6170 | 0.983 | 0.983 | 0.987 | 0.983 |
| 6180 | 0.984 | 0.984 | 0.988 | 0.984 |
| 6190 | 0.984 | 0.983 | 0.988 | 0.983 |
| 6200 | 0.986 | 0.986 | 0.991 | 0.986 |
| 6210 | 0.982 | 0.982 | 0.988 | 0.982 |
| 6220 | 0.985 | 0.985 | 0.988 | 0.985 |
| 6230 | 0.986 | 0.985 | 0.987 | 0.986 |
| 6240 | 0.984 | 0.983 | 0.989 | 0.984 |
| 6250 | 0.986 | 0.985 | 0.990 | 0.986 |
| 6260 | 0.986 | 0.985 | 0.990 | 0.986 |
| 6270 | 0.982 | 0.981 | 0.987 | 0.981 |
| 6280 | 0.984 | 0.984 | 0.988 | 0.984 |
| 6290 | 0.984 | 0.983 | 0.989 | 0.983 |
| 6300 | 0.986 | 0.986 | 0.991 | 0.986 |
| 6310 | 0.986 | 0.985 | 0.989 | 0.986 |
| 6320 | 0.985 | 0.985 | 0.989 | 0.985 |
| 6330 | 0.984 | 0.983 | 0.988 | 0.984 |
| 6340 | 0.984 | 0.983 | 0.988 | 0.984 |
| 6350 | 0.984 | 0.983 | 0.988 | 0.984 |
| 6360 | 0.984 | 0.983 | 0.988 | 0.983 |
| 6370 | 0.984 | 0.983 | 0.988 | 0.984 |
| 6380 | 0.982 | 0.982 | 0.986 | 0.982 |
| 6390 | 0.984 | 0.983 | 0.987 | 0.984 |
| 6400 | 0.983 | 0.983 | 0.987 | 0.983 |
| 6410 | 0.984 | 0.984 | 0.988 | 0.984 |
| 6420 | 0.983 | 0.983 | 0.987 | 0.983 |
| 6430 | 0.988 | 0.987 | 0.992 | 0.988 |
| 6440 | 0.985 | 0.985 | 0.988 | 0.985 |
| 6450 | 0.982 | 0.981 | 0.987 | 0.981 |
| 6460 | 0.983 | 0.983 | 0.987 | 0.983 |
| 6470 | 0.983 | 0.983 | 0.987 | 0.983 |
| 6480 | 0.984 | 0.984 | 0.988 | 0.984 |
| 6490 | 0.985 | 0.985 | 0.988 | 0.985 |
| 6500 | 0.984 | 0.984 | 0.987 | 0.984 |

|      |       |       |       |       |
|------|-------|-------|-------|-------|
| 6510 | 0.984 | 0.983 | 0.989 | 0.983 |
| 6520 | 0.983 | 0.983 | 0.986 | 0.983 |
| 6530 | 0.986 | 0.985 | 0.988 | 0.986 |
| 6540 | 0.984 | 0.983 | 0.987 | 0.984 |
| 6550 | 0.984 | 0.983 | 0.987 | 0.984 |
| 6560 | 0.986 | 0.985 | 0.990 | 0.986 |
| 6570 | 0.984 | 0.984 | 0.988 | 0.984 |
| 6580 | 0.984 | 0.983 | 0.988 | 0.984 |
| 6590 | 0.985 | 0.985 | 0.989 | 0.985 |
| 6600 | 0.985 | 0.985 | 0.989 | 0.985 |
| 6610 | 0.980 | 0.980 | 0.986 | 0.980 |
| 6620 | 0.982 | 0.981 | 0.987 | 0.981 |
| 6630 | 0.984 | 0.983 | 0.988 | 0.984 |
| 6640 | 0.985 | 0.985 | 0.988 | 0.985 |
| 6650 | 0.982 | 0.981 | 0.986 | 0.982 |
| 6660 | 0.982 | 0.982 | 0.987 | 0.982 |
| 6670 | 0.987 | 0.987 | 0.990 | 0.987 |
| 6680 | 0.983 | 0.983 | 0.988 | 0.983 |
| 6690 | 0.985 | 0.985 | 0.988 | 0.985 |
| 6700 | 0.982 | 0.982 | 0.987 | 0.982 |
| 6710 | 0.984 | 0.984 | 0.988 | 0.984 |
| 6720 | 0.986 | 0.985 | 0.988 | 0.986 |
| 6730 | 0.982 | 0.981 | 0.985 | 0.982 |
| 6740 | 0.984 | 0.983 | 0.989 | 0.984 |
| 6750 | 0.982 | 0.982 | 0.986 | 0.982 |
| 6760 | 0.984 | 0.983 | 0.988 | 0.984 |
| 6770 | 0.983 | 0.983 | 0.987 | 0.983 |
| 6780 | 0.980 | 0.980 | 0.983 | 0.980 |
| 6790 | 0.986 | 0.985 | 0.990 | 0.986 |
| 6800 | 0.984 | 0.984 | 0.989 | 0.984 |
| 6810 | 0.981 | 0.980 | 0.985 | 0.981 |
| 6820 | 0.984 | 0.983 | 0.988 | 0.984 |
| 6830 | 0.984 | 0.984 | 0.989 | 0.984 |
| 6840 | 0.988 | 0.987 | 0.991 | 0.988 |
| 6850 | 0.985 | 0.985 | 0.988 | 0.985 |
| 6860 | 0.985 | 0.985 | 0.989 | 0.985 |
| 6870 | 0.984 | 0.983 | 0.989 | 0.984 |
| 6880 | 0.983 | 0.983 | 0.987 | 0.983 |
| 6890 | 0.984 | 0.983 | 0.987 | 0.984 |
| 6900 | 0.987 | 0.987 | 0.990 | 0.987 |
| 6910 | 0.986 | 0.986 | 0.989 | 0.986 |
| 6920 | 0.985 | 0.985 | 0.988 | 0.985 |
| 6930 | 0.984 | 0.984 | 0.988 | 0.984 |

|      |       |       |       |       |
|------|-------|-------|-------|-------|
| 6940 | 0.982 | 0.982 | 0.987 | 0.982 |
| 6950 | 0.982 | 0.982 | 0.987 | 0.982 |
| 6960 | 0.982 | 0.982 | 0.986 | 0.982 |
| 6970 | 0.986 | 0.985 | 0.989 | 0.986 |
| 6980 | 0.986 | 0.985 | 0.990 | 0.986 |
| 6990 | 0.982 | 0.981 | 0.987 | 0.981 |
| 7000 | 0.983 | 0.983 | 0.988 | 0.983 |
| 7010 | 0.985 | 0.985 | 0.989 | 0.985 |
| 7020 | 0.984 | 0.984 | 0.987 | 0.984 |
| 7030 | 0.984 | 0.983 | 0.987 | 0.984 |
| 7040 | 0.982 | 0.982 | 0.987 | 0.982 |
| 7050 | 0.983 | 0.983 | 0.986 | 0.983 |
| 7060 | 0.986 | 0.986 | 0.990 | 0.986 |
| 7070 | 0.986 | 0.986 | 0.990 | 0.986 |
| 7080 | 0.984 | 0.983 | 0.987 | 0.984 |
| 7090 | 0.984 | 0.983 | 0.989 | 0.984 |
| 7100 | 0.984 | 0.983 | 0.988 | 0.983 |
| 7110 | 0.984 | 0.984 | 0.988 | 0.984 |
| 7120 | 0.986 | 0.986 | 0.989 | 0.986 |
| 7130 | 0.984 | 0.984 | 0.988 | 0.984 |
| 7140 | 0.983 | 0.983 | 0.987 | 0.983 |
| 7150 | 0.984 | 0.983 | 0.989 | 0.983 |
| 7160 | 0.987 | 0.987 | 0.992 | 0.987 |
| 7170 | 0.985 | 0.985 | 0.990 | 0.985 |
| 7180 | 0.980 | 0.980 | 0.986 | 0.980 |
| 7190 | 0.984 | 0.984 | 0.987 | 0.984 |
| 7200 | 0.982 | 0.982 | 0.986 | 0.982 |
| 7210 | 0.984 | 0.983 | 0.988 | 0.984 |
| 7220 | 0.981 | 0.980 | 0.985 | 0.981 |
| 7230 | 0.982 | 0.982 | 0.985 | 0.982 |
| 7240 | 0.984 | 0.983 | 0.989 | 0.983 |
| 7250 | 0.984 | 0.984 | 0.988 | 0.984 |
| 7260 | 0.985 | 0.985 | 0.989 | 0.985 |
| 7270 | 0.982 | 0.982 | 0.988 | 0.982 |
| 7280 | 0.982 | 0.982 | 0.988 | 0.982 |
| 7290 | 0.982 | 0.982 | 0.987 | 0.982 |
| 7300 | 0.982 | 0.982 | 0.988 | 0.982 |
| 7310 | 0.982 | 0.982 | 0.987 | 0.982 |
| 7320 | 0.984 | 0.984 | 0.988 | 0.984 |
| 7330 | 0.983 | 0.983 | 0.987 | 0.983 |
| 7340 | 0.984 | 0.983 | 0.988 | 0.983 |
| 7350 | 0.983 | 0.983 | 0.989 | 0.983 |
| 7360 | 0.986 | 0.986 | 0.990 | 0.986 |

|      |       |       |       |       |
|------|-------|-------|-------|-------|
| 7370 | 0.985 | 0.985 | 0.989 | 0.985 |
| 7380 | 0.978 | 0.977 | 0.982 | 0.977 |
| 7390 | 0.986 | 0.985 | 0.989 | 0.986 |
| 7400 | 0.986 | 0.985 | 0.988 | 0.986 |
| 7410 | 0.986 | 0.986 | 0.990 | 0.986 |
| 7420 | 0.986 | 0.985 | 0.990 | 0.986 |
| 7430 | 0.984 | 0.983 | 0.988 | 0.984 |
| 7440 | 0.984 | 0.984 | 0.988 | 0.984 |
| 7450 | 0.982 | 0.981 | 0.986 | 0.982 |
| 7460 | 0.984 | 0.984 | 0.988 | 0.984 |
| 7470 | 0.987 | 0.987 | 0.990 | 0.987 |
| 7480 | 0.982 | 0.981 | 0.986 | 0.981 |
| 7490 | 0.982 | 0.982 | 0.986 | 0.982 |
| 7500 | 0.984 | 0.983 | 0.987 | 0.983 |
| 7510 | 0.984 | 0.984 | 0.988 | 0.984 |
| 7520 | 0.984 | 0.984 | 0.988 | 0.984 |
| 7530 | 0.984 | 0.983 | 0.989 | 0.984 |
| 7540 | 0.986 | 0.985 | 0.989 | 0.986 |
| 7550 | 0.985 | 0.985 | 0.987 | 0.985 |
| 7560 | 0.986 | 0.986 | 0.990 | 0.986 |
| 7570 | 0.986 | 0.985 | 0.989 | 0.986 |
| 7580 | 0.988 | 0.988 | 0.992 | 0.988 |
| 7590 | 0.986 | 0.985 | 0.991 | 0.986 |
| 7600 | 0.984 | 0.983 | 0.986 | 0.984 |
| 7610 | 0.984 | 0.983 | 0.986 | 0.984 |
| 7620 | 0.982 | 0.982 | 0.986 | 0.982 |
| 7630 | 0.981 | 0.980 | 0.985 | 0.981 |
| 7640 | 0.981 | 0.980 | 0.987 | 0.981 |
| 7650 | 0.986 | 0.985 | 0.990 | 0.986 |
| 7660 | 0.984 | 0.983 | 0.988 | 0.984 |
| 7670 | 0.987 | 0.987 | 0.990 | 0.987 |
| 7680 | 0.987 | 0.987 | 0.990 | 0.987 |
| 7690 | 0.984 | 0.983 | 0.987 | 0.984 |
| 7700 | 0.986 | 0.986 | 0.989 | 0.986 |
| 7710 | 0.982 | 0.982 | 0.986 | 0.982 |
| 7720 | 0.984 | 0.984 | 0.988 | 0.984 |
| 7730 | 0.982 | 0.982 | 0.987 | 0.982 |
| 7740 | 0.982 | 0.981 | 0.986 | 0.982 |
| 7750 | 0.986 | 0.986 | 0.990 | 0.986 |
| 7760 | 0.983 | 0.983 | 0.986 | 0.983 |
| 7770 | 0.986 | 0.985 | 0.989 | 0.986 |
| 7780 | 0.984 | 0.984 | 0.988 | 0.984 |
| 7790 | 0.984 | 0.983 | 0.987 | 0.984 |

|      |       |       |       |       |
|------|-------|-------|-------|-------|
| 7800 | 0.984 | 0.984 | 0.988 | 0.984 |
| 7810 | 0.983 | 0.983 | 0.988 | 0.983 |
| 7820 | 0.986 | 0.985 | 0.990 | 0.986 |
| 7830 | 0.985 | 0.985 | 0.989 | 0.985 |
| 7840 | 0.984 | 0.983 | 0.988 | 0.984 |
| 7850 | 0.984 | 0.984 | 0.988 | 0.984 |
| 7860 | 0.982 | 0.981 | 0.985 | 0.982 |
| 7870 | 0.984 | 0.983 | 0.988 | 0.984 |
| 7880 | 0.984 | 0.984 | 0.989 | 0.984 |
| 7890 | 0.985 | 0.985 | 0.988 | 0.985 |
| 7900 | 0.986 | 0.986 | 0.990 | 0.986 |
| 7910 | 0.983 | 0.983 | 0.987 | 0.983 |
| 7920 | 0.983 | 0.983 | 0.987 | 0.983 |
| 7930 | 0.985 | 0.985 | 0.989 | 0.985 |
| 7940 | 0.982 | 0.981 | 0.987 | 0.981 |
| 7950 | 0.983 | 0.983 | 0.988 | 0.983 |
| 7960 | 0.982 | 0.982 | 0.987 | 0.982 |
| 7970 | 0.984 | 0.983 | 0.988 | 0.984 |
| 7980 | 0.984 | 0.984 | 0.988 | 0.984 |
| 7990 | 0.988 | 0.988 | 0.991 | 0.988 |
| 8000 | 0.984 | 0.984 | 0.988 | 0.984 |
| 8010 | 0.982 | 0.982 | 0.986 | 0.982 |
| 8020 | 0.984 | 0.984 | 0.989 | 0.984 |
| 8030 | 0.985 | 0.985 | 0.988 | 0.985 |
| 8040 | 0.983 | 0.983 | 0.988 | 0.983 |
| 8050 | 0.982 | 0.981 | 0.986 | 0.982 |
| 8060 | 0.985 | 0.985 | 0.988 | 0.985 |
| 8070 | 0.982 | 0.982 | 0.988 | 0.982 |
| 8080 | 0.980 | 0.980 | 0.984 | 0.980 |
| 8090 | 0.986 | 0.985 | 0.991 | 0.986 |
| 8100 | 0.984 | 0.984 | 0.989 | 0.984 |
| 8110 | 0.985 | 0.985 | 0.987 | 0.985 |
| 8120 | 0.985 | 0.985 | 0.989 | 0.985 |
| 8130 | 0.986 | 0.985 | 0.988 | 0.986 |
| 8140 | 0.982 | 0.981 | 0.984 | 0.982 |
| 8150 | 0.984 | 0.984 | 0.988 | 0.984 |
| 8160 | 0.984 | 0.983 | 0.988 | 0.984 |
| 8170 | 0.983 | 0.983 | 0.988 | 0.983 |
| 8180 | 0.984 | 0.984 | 0.988 | 0.984 |
| 8190 | 0.982 | 0.981 | 0.987 | 0.981 |
| 8200 | 0.983 | 0.983 | 0.986 | 0.983 |
| 8210 | 0.986 | 0.986 | 0.989 | 0.986 |
| 8220 | 0.984 | 0.984 | 0.989 | 0.984 |

|      |       |       |       |       |
|------|-------|-------|-------|-------|
| 8230 | 0.984 | 0.983 | 0.988 | 0.984 |
| 8240 | 0.982 | 0.981 | 0.987 | 0.982 |
| 8250 | 0.984 | 0.984 | 0.987 | 0.984 |
| 8260 | 0.984 | 0.983 | 0.987 | 0.984 |
| 8270 | 0.983 | 0.983 | 0.989 | 0.983 |
| 8280 | 0.982 | 0.981 | 0.986 | 0.981 |
| 8290 | 0.981 | 0.980 | 0.987 | 0.981 |
| 8300 | 0.982 | 0.981 | 0.987 | 0.981 |
| 8310 | 0.984 | 0.984 | 0.987 | 0.984 |
| 8320 | 0.983 | 0.983 | 0.988 | 0.983 |
| 8330 | 0.984 | 0.983 | 0.987 | 0.984 |
| 8340 | 0.982 | 0.981 | 0.986 | 0.982 |
| 8350 | 0.982 | 0.981 | 0.987 | 0.982 |
| 8360 | 0.982 | 0.982 | 0.987 | 0.982 |
| 8370 | 0.985 | 0.985 | 0.988 | 0.985 |
| 8380 | 0.987 | 0.987 | 0.990 | 0.987 |
| 8390 | 0.984 | 0.984 | 0.988 | 0.984 |
| 8400 | 0.985 | 0.985 | 0.988 | 0.985 |
| 8410 | 0.982 | 0.981 | 0.986 | 0.982 |
| 8420 | 0.982 | 0.981 | 0.986 | 0.982 |
| 8430 | 0.986 | 0.985 | 0.989 | 0.986 |
| 8440 | 0.984 | 0.984 | 0.989 | 0.984 |
| 8450 | 0.982 | 0.982 | 0.988 | 0.982 |
| 8460 | 0.984 | 0.984 | 0.988 | 0.984 |
| 8470 | 0.983 | 0.983 | 0.988 | 0.983 |
| 8480 | 0.982 | 0.982 | 0.987 | 0.982 |
| 8490 | 0.984 | 0.983 | 0.988 | 0.984 |
| 8500 | 0.983 | 0.983 | 0.986 | 0.983 |
| 8510 | 0.984 | 0.983 | 0.988 | 0.984 |
| 8520 | 0.984 | 0.983 | 0.987 | 0.984 |
| 8530 | 0.982 | 0.982 | 0.987 | 0.982 |
| 8540 | 0.985 | 0.985 | 0.988 | 0.985 |
| 8550 | 0.985 | 0.985 | 0.988 | 0.985 |
| 8560 | 0.983 | 0.983 | 0.987 | 0.983 |
| 8570 | 0.984 | 0.984 | 0.989 | 0.984 |
| 8580 | 0.984 | 0.984 | 0.988 | 0.984 |
| 8590 | 0.987 | 0.987 | 0.991 | 0.987 |
| 8600 | 0.980 | 0.980 | 0.986 | 0.980 |
| 8610 | 0.982 | 0.982 | 0.987 | 0.982 |
| 8620 | 0.985 | 0.985 | 0.989 | 0.985 |
| 8630 | 0.982 | 0.982 | 0.987 | 0.982 |
| 8640 | 0.982 | 0.982 | 0.987 | 0.982 |
| 8650 | 0.983 | 0.983 | 0.987 | 0.983 |

|      |       |       |       |       |
|------|-------|-------|-------|-------|
| 8660 | 0.985 | 0.985 | 0.989 | 0.985 |
| 8670 | 0.982 | 0.982 | 0.987 | 0.982 |
| 8680 | 0.982 | 0.982 | 0.986 | 0.982 |
| 8690 | 0.986 | 0.985 | 0.989 | 0.986 |
| 8700 | 0.983 | 0.983 | 0.988 | 0.983 |
| 8710 | 0.980 | 0.980 | 0.986 | 0.980 |
| 8720 | 0.986 | 0.985 | 0.990 | 0.986 |
| 8730 | 0.982 | 0.981 | 0.987 | 0.982 |
| 8740 | 0.983 | 0.983 | 0.987 | 0.983 |
| 8750 | 0.983 | 0.983 | 0.987 | 0.983 |
| 8760 | 0.984 | 0.984 | 0.988 | 0.984 |
| 8770 | 0.982 | 0.982 | 0.988 | 0.982 |
| 8780 | 0.984 | 0.983 | 0.988 | 0.984 |
| 8790 | 0.982 | 0.982 | 0.986 | 0.982 |
| 8800 | 0.984 | 0.984 | 0.989 | 0.984 |
| 8810 | 0.985 | 0.985 | 0.989 | 0.985 |
| 8820 | 0.983 | 0.983 | 0.989 | 0.983 |
| 8830 | 0.984 | 0.983 | 0.987 | 0.984 |
| 8840 | 0.982 | 0.981 | 0.986 | 0.982 |
| 8850 | 0.983 | 0.983 | 0.987 | 0.983 |
| 8860 | 0.982 | 0.982 | 0.988 | 0.982 |
| 8870 | 0.985 | 0.985 | 0.989 | 0.985 |
| 8880 | 0.982 | 0.981 | 0.986 | 0.981 |
| 8890 | 0.984 | 0.984 | 0.990 | 0.984 |
| 8900 | 0.983 | 0.983 | 0.988 | 0.983 |
| 8910 | 0.984 | 0.983 | 0.987 | 0.984 |
| 8920 | 0.980 | 0.980 | 0.985 | 0.980 |
| 8930 | 0.985 | 0.985 | 0.990 | 0.985 |
| 8940 | 0.984 | 0.983 | 0.988 | 0.984 |
| 8950 | 0.980 | 0.980 | 0.985 | 0.980 |

(4) IFS results with DT on the LightGBM feature list

| Number of features | ACC   | MCC   | Macro_F1 | Weighted_F1 |
|--------------------|-------|-------|----------|-------------|
| 10                 | 0.580 | 0.570 | 0.613    | 0.575       |
| 20                 | 0.695 | 0.687 | 0.711    | 0.697       |
| 30                 | 0.740 | 0.733 | 0.746    | 0.740       |
| 40                 | 0.749 | 0.743 | 0.760    | 0.751       |
| 50                 | 0.766 | 0.760 | 0.778    | 0.765       |
| 60                 | 0.750 | 0.744 | 0.767    | 0.747       |
| 70                 | 0.770 | 0.764 | 0.777    | 0.769       |
| 80                 | 0.773 | 0.767 | 0.789    | 0.773       |
| 90                 | 0.794 | 0.788 | 0.796    | 0.795       |
| 100                | 0.783 | 0.777 | 0.795    | 0.782       |

|     |       |       |       |       |
|-----|-------|-------|-------|-------|
| 110 | 0.791 | 0.786 | 0.799 | 0.790 |
| 120 | 0.784 | 0.778 | 0.783 | 0.784 |
| 130 | 0.807 | 0.802 | 0.806 | 0.806 |
| 140 | 0.798 | 0.793 | 0.804 | 0.798 |
| 150 | 0.797 | 0.791 | 0.812 | 0.796 |
| 160 | 0.796 | 0.791 | 0.810 | 0.796 |
| 170 | 0.791 | 0.785 | 0.798 | 0.790 |
| 180 | 0.809 | 0.804 | 0.815 | 0.809 |
| 190 | 0.796 | 0.790 | 0.804 | 0.796 |
| 200 | 0.811 | 0.806 | 0.822 | 0.811 |
| 210 | 0.816 | 0.811 | 0.817 | 0.816 |
| 220 | 0.805 | 0.800 | 0.810 | 0.806 |
| 230 | 0.795 | 0.790 | 0.802 | 0.794 |
| 240 | 0.824 | 0.819 | 0.836 | 0.825 |
| 250 | 0.827 | 0.822 | 0.839 | 0.827 |
| 260 | 0.818 | 0.813 | 0.829 | 0.818 |
| 270 | 0.813 | 0.808 | 0.828 | 0.813 |
| 280 | 0.822 | 0.817 | 0.828 | 0.823 |
| 290 | 0.818 | 0.813 | 0.824 | 0.819 |
| 300 | 0.817 | 0.812 | 0.817 | 0.818 |
| 310 | 0.832 | 0.828 | 0.841 | 0.830 |
| 320 | 0.832 | 0.827 | 0.836 | 0.831 |
| 330 | 0.819 | 0.814 | 0.821 | 0.818 |
| 340 | 0.824 | 0.820 | 0.833 | 0.824 |
| 350 | 0.816 | 0.811 | 0.813 | 0.816 |
| 360 | 0.813 | 0.808 | 0.821 | 0.814 |
| 370 | 0.836 | 0.831 | 0.841 | 0.837 |
| 380 | 0.823 | 0.818 | 0.822 | 0.824 |
| 390 | 0.817 | 0.813 | 0.822 | 0.817 |
| 400 | 0.836 | 0.831 | 0.841 | 0.837 |
| 410 | 0.834 | 0.830 | 0.829 | 0.834 |
| 420 | 0.823 | 0.819 | 0.824 | 0.824 |
| 430 | 0.829 | 0.824 | 0.822 | 0.830 |
| 440 | 0.832 | 0.827 | 0.822 | 0.832 |
| 450 | 0.833 | 0.828 | 0.841 | 0.834 |
| 460 | 0.833 | 0.828 | 0.830 | 0.834 |
| 470 | 0.839 | 0.835 | 0.835 | 0.838 |
| 480 | 0.826 | 0.821 | 0.825 | 0.826 |
| 490 | 0.822 | 0.817 | 0.821 | 0.821 |
| 500 | 0.845 | 0.841 | 0.842 | 0.846 |
| 510 | 0.827 | 0.822 | 0.839 | 0.827 |
| 520 | 0.830 | 0.825 | 0.840 | 0.831 |
| 530 | 0.834 | 0.829 | 0.838 | 0.835 |



|     |       |       |       |       |
|-----|-------|-------|-------|-------|
| 540 | 0.828 | 0.823 | 0.834 | 0.828 |
| 550 | 0.832 | 0.828 | 0.836 | 0.833 |
| 560 | 0.823 | 0.819 | 0.823 | 0.824 |
| 570 | 0.819 | 0.814 | 0.826 | 0.819 |
| 580 | 0.828 | 0.823 | 0.838 | 0.827 |
| 590 | 0.820 | 0.815 | 0.832 | 0.821 |
| 600 | 0.832 | 0.828 | 0.830 | 0.834 |
| 610 | 0.833 | 0.828 | 0.835 | 0.833 |
| 620 | 0.840 | 0.836 | 0.833 | 0.841 |
| 630 | 0.821 | 0.817 | 0.826 | 0.822 |
| 640 | 0.825 | 0.820 | 0.826 | 0.826 |
| 650 | 0.842 | 0.838 | 0.839 | 0.843 |
| 660 | 0.849 | 0.845 | 0.857 | 0.851 |
| 670 | 0.847 | 0.842 | 0.849 | 0.848 |
| 680 | 0.840 | 0.836 | 0.833 | 0.842 |
| 690 | 0.821 | 0.816 | 0.818 | 0.821 |
| 700 | 0.826 | 0.821 | 0.827 | 0.825 |
| 710 | 0.853 | 0.849 | 0.849 | 0.853 |
| 720 | 0.836 | 0.832 | 0.831 | 0.838 |
| 730 | 0.829 | 0.824 | 0.818 | 0.828 |
| 740 | 0.831 | 0.826 | 0.827 | 0.830 |
| 750 | 0.846 | 0.842 | 0.847 | 0.848 |
| 760 | 0.837 | 0.833 | 0.830 | 0.837 |
| 770 | 0.844 | 0.840 | 0.838 | 0.845 |
| 780 | 0.853 | 0.849 | 0.864 | 0.852 |
| 790 | 0.858 | 0.854 | 0.856 | 0.857 |
| 800 | 0.861 | 0.857 | 0.857 | 0.861 |
| 810 | 0.834 | 0.830 | 0.828 | 0.836 |
| 820 | 0.840 | 0.835 | 0.835 | 0.840 |
| 830 | 0.848 | 0.844 | 0.848 | 0.848 |
| 840 | 0.842 | 0.837 | 0.833 | 0.841 |
| 850 | 0.845 | 0.841 | 0.835 | 0.844 |
| 860 | 0.852 | 0.848 | 0.861 | 0.853 |
| 870 | 0.853 | 0.849 | 0.851 | 0.854 |
| 880 | 0.826 | 0.821 | 0.821 | 0.825 |
| 890 | 0.843 | 0.839 | 0.829 | 0.843 |
| 900 | 0.847 | 0.843 | 0.846 | 0.847 |
| 910 | 0.836 | 0.831 | 0.827 | 0.836 |
| 920 | 0.849 | 0.845 | 0.846 | 0.850 |
| 930 | 0.846 | 0.842 | 0.843 | 0.847 |
| 940 | 0.836 | 0.832 | 0.830 | 0.837 |
| 950 | 0.842 | 0.837 | 0.833 | 0.841 |
| 960 | 0.840 | 0.835 | 0.843 | 0.839 |

|      |       |       |       |       |
|------|-------|-------|-------|-------|
| 970  | 0.830 | 0.826 | 0.829 | 0.829 |
| 980  | 0.836 | 0.831 | 0.831 | 0.838 |
| 990  | 0.837 | 0.833 | 0.834 | 0.837 |
| 1000 | 0.846 | 0.842 | 0.844 | 0.846 |
| 1010 | 0.849 | 0.845 | 0.849 | 0.849 |
| 1020 | 0.859 | 0.856 | 0.856 | 0.859 |
| 1030 | 0.855 | 0.851 | 0.864 | 0.855 |
| 1040 | 0.851 | 0.847 | 0.841 | 0.852 |
| 1050 | 0.858 | 0.854 | 0.856 | 0.858 |
| 1060 | 0.836 | 0.832 | 0.832 | 0.837 |
| 1070 | 0.850 | 0.846 | 0.853 | 0.849 |
| 1080 | 0.830 | 0.825 | 0.831 | 0.832 |
| 1090 | 0.850 | 0.846 | 0.853 | 0.851 |
| 1100 | 0.844 | 0.840 | 0.837 | 0.845 |
| 1110 | 0.833 | 0.828 | 0.833 | 0.833 |
| 1120 | 0.844 | 0.840 | 0.842 | 0.845 |
| 1130 | 0.845 | 0.841 | 0.847 | 0.845 |
| 1140 | 0.846 | 0.842 | 0.836 | 0.848 |
| 1150 | 0.845 | 0.840 | 0.835 | 0.846 |
| 1160 | 0.842 | 0.838 | 0.845 | 0.842 |
| 1170 | 0.853 | 0.849 | 0.851 | 0.851 |
| 1180 | 0.849 | 0.844 | 0.850 | 0.847 |
| 1190 | 0.836 | 0.832 | 0.834 | 0.837 |
| 1200 | 0.843 | 0.839 | 0.832 | 0.844 |
| 1210 | 0.854 | 0.850 | 0.857 | 0.853 |
| 1220 | 0.868 | 0.864 | 0.868 | 0.868 |
| 1230 | 0.847 | 0.843 | 0.840 | 0.847 |
| 1240 | 0.849 | 0.844 | 0.848 | 0.848 |
| 1250 | 0.850 | 0.846 | 0.844 | 0.850 |
| 1260 | 0.832 | 0.828 | 0.836 | 0.833 |
| 1270 | 0.824 | 0.819 | 0.826 | 0.824 |
| 1280 | 0.847 | 0.842 | 0.852 | 0.848 |
| 1290 | 0.848 | 0.844 | 0.840 | 0.847 |
| 1300 | 0.842 | 0.838 | 0.835 | 0.843 |
| 1310 | 0.841 | 0.837 | 0.840 | 0.841 |
| 1320 | 0.845 | 0.841 | 0.837 | 0.846 |
| 1330 | 0.855 | 0.851 | 0.850 | 0.856 |
| 1340 | 0.839 | 0.835 | 0.840 | 0.839 |
| 1350 | 0.838 | 0.834 | 0.834 | 0.840 |
| 1360 | 0.843 | 0.839 | 0.839 | 0.844 |
| 1370 | 0.834 | 0.830 | 0.832 | 0.834 |
| 1380 | 0.841 | 0.837 | 0.847 | 0.842 |
| 1390 | 0.853 | 0.849 | 0.853 | 0.854 |

|      |       |       |       |       |
|------|-------|-------|-------|-------|
| 1400 | 0.837 | 0.833 | 0.839 | 0.837 |
| 1410 | 0.846 | 0.842 | 0.852 | 0.845 |
| 1420 | 0.846 | 0.842 | 0.843 | 0.847 |
| 1430 | 0.834 | 0.829 | 0.830 | 0.834 |
| 1440 | 0.842 | 0.838 | 0.843 | 0.841 |
| 1450 | 0.851 | 0.847 | 0.852 | 0.852 |
| 1460 | 0.845 | 0.840 | 0.832 | 0.846 |
| 1470 | 0.843 | 0.839 | 0.840 | 0.844 |
| 1480 | 0.855 | 0.851 | 0.847 | 0.855 |
| 1490 | 0.847 | 0.843 | 0.851 | 0.849 |
| 1500 | 0.847 | 0.842 | 0.842 | 0.847 |
| 1510 | 0.830 | 0.825 | 0.826 | 0.832 |
| 1520 | 0.849 | 0.845 | 0.848 | 0.850 |
| 1530 | 0.831 | 0.826 | 0.824 | 0.832 |
| 1540 | 0.838 | 0.833 | 0.825 | 0.839 |
| 1550 | 0.850 | 0.846 | 0.840 | 0.849 |
| 1560 | 0.832 | 0.828 | 0.826 | 0.832 |
| 1570 | 0.837 | 0.833 | 0.826 | 0.838 |
| 1580 | 0.846 | 0.842 | 0.842 | 0.845 |
| 1590 | 0.849 | 0.844 | 0.850 | 0.850 |
| 1600 | 0.841 | 0.837 | 0.834 | 0.843 |
| 1610 | 0.843 | 0.839 | 0.837 | 0.844 |
| 1620 | 0.849 | 0.844 | 0.848 | 0.847 |
| 1630 | 0.841 | 0.837 | 0.840 | 0.841 |
| 1640 | 0.838 | 0.834 | 0.833 | 0.838 |
| 1650 | 0.846 | 0.842 | 0.849 | 0.847 |
| 1660 | 0.846 | 0.842 | 0.848 | 0.847 |
| 1670 | 0.842 | 0.838 | 0.834 | 0.843 |
| 1680 | 0.853 | 0.849 | 0.852 | 0.853 |
| 1690 | 0.851 | 0.846 | 0.848 | 0.851 |
| 1700 | 0.842 | 0.838 | 0.844 | 0.844 |
| 1710 | 0.840 | 0.836 | 0.836 | 0.842 |
| 1720 | 0.856 | 0.852 | 0.858 | 0.858 |
| 1730 | 0.848 | 0.844 | 0.848 | 0.846 |
| 1740 | 0.855 | 0.851 | 0.853 | 0.855 |
| 1750 | 0.849 | 0.845 | 0.858 | 0.849 |
| 1760 | 0.858 | 0.854 | 0.848 | 0.860 |
| 1770 | 0.855 | 0.851 | 0.858 | 0.855 |
| 1780 | 0.848 | 0.844 | 0.847 | 0.847 |
| 1790 | 0.859 | 0.855 | 0.853 | 0.858 |
| 1800 | 0.853 | 0.849 | 0.840 | 0.854 |
| 1810 | 0.838 | 0.834 | 0.833 | 0.840 |
| 1820 | 0.824 | 0.819 | 0.818 | 0.822 |

|      |       |       |       |       |
|------|-------|-------|-------|-------|
| 1830 | 0.830 | 0.826 | 0.828 | 0.830 |
| 1840 | 0.843 | 0.839 | 0.837 | 0.844 |
| 1850 | 0.860 | 0.856 | 0.856 | 0.859 |
| 1860 | 0.847 | 0.843 | 0.842 | 0.846 |
| 1870 | 0.845 | 0.840 | 0.841 | 0.844 |
| 1880 | 0.852 | 0.848 | 0.845 | 0.853 |
| 1890 | 0.832 | 0.828 | 0.837 | 0.833 |
| 1900 | 0.845 | 0.841 | 0.844 | 0.844 |
| 1910 | 0.856 | 0.852 | 0.846 | 0.857 |
| 1920 | 0.847 | 0.842 | 0.835 | 0.848 |
| 1930 | 0.849 | 0.844 | 0.844 | 0.848 |
| 1940 | 0.844 | 0.840 | 0.844 | 0.844 |
| 1950 | 0.841 | 0.837 | 0.836 | 0.841 |
| 1960 | 0.840 | 0.835 | 0.833 | 0.841 |
| 1970 | 0.855 | 0.852 | 0.842 | 0.856 |
| 1980 | 0.860 | 0.856 | 0.853 | 0.860 |
| 1990 | 0.845 | 0.840 | 0.832 | 0.845 |
| 2000 | 0.855 | 0.851 | 0.850 | 0.855 |
| 2010 | 0.842 | 0.837 | 0.840 | 0.842 |
| 2020 | 0.839 | 0.835 | 0.836 | 0.841 |
| 2030 | 0.838 | 0.833 | 0.840 | 0.838 |
| 2040 | 0.851 | 0.847 | 0.839 | 0.850 |
| 2050 | 0.838 | 0.833 | 0.827 | 0.838 |
| 2060 | 0.842 | 0.838 | 0.838 | 0.843 |
| 2070 | 0.851 | 0.847 | 0.849 | 0.852 |
| 2080 | 0.840 | 0.836 | 0.823 | 0.841 |
| 2090 | 0.836 | 0.832 | 0.826 | 0.837 |
| 2100 | 0.849 | 0.844 | 0.855 | 0.849 |
| 2110 | 0.856 | 0.852 | 0.855 | 0.858 |
| 2120 | 0.844 | 0.840 | 0.835 | 0.844 |
| 2130 | 0.856 | 0.852 | 0.855 | 0.856 |
| 2140 | 0.853 | 0.849 | 0.846 | 0.853 |
| 2150 | 0.848 | 0.844 | 0.843 | 0.849 |
| 2160 | 0.828 | 0.823 | 0.820 | 0.828 |
| 2170 | 0.836 | 0.832 | 0.829 | 0.836 |
| 2180 | 0.848 | 0.844 | 0.838 | 0.849 |
| 2190 | 0.853 | 0.849 | 0.848 | 0.853 |
| 2200 | 0.837 | 0.832 | 0.839 | 0.838 |
| 2210 | 0.855 | 0.851 | 0.851 | 0.857 |
| 2220 | 0.842 | 0.838 | 0.843 | 0.840 |
| 2230 | 0.843 | 0.839 | 0.844 | 0.843 |
| 2240 | 0.858 | 0.854 | 0.857 | 0.858 |
| 2250 | 0.842 | 0.838 | 0.836 | 0.843 |

|      |       |       |       |       |
|------|-------|-------|-------|-------|
| 2260 | 0.849 | 0.844 | 0.844 | 0.848 |
| 2270 | 0.850 | 0.846 | 0.845 | 0.850 |
| 2280 | 0.852 | 0.848 | 0.845 | 0.853 |
| 2290 | 0.845 | 0.840 | 0.829 | 0.844 |
| 2300 | 0.842 | 0.837 | 0.837 | 0.843 |
| 2310 | 0.848 | 0.844 | 0.849 | 0.849 |
| 2320 | 0.845 | 0.840 | 0.837 | 0.845 |
| 2330 | 0.842 | 0.837 | 0.835 | 0.843 |
| 2340 | 0.851 | 0.847 | 0.840 | 0.853 |
| 2350 | 0.847 | 0.843 | 0.835 | 0.848 |
| 2360 | 0.849 | 0.845 | 0.835 | 0.849 |
| 2370 | 0.847 | 0.842 | 0.835 | 0.848 |
| 2380 | 0.851 | 0.847 | 0.847 | 0.850 |
| 2390 | 0.849 | 0.845 | 0.842 | 0.850 |
| 2400 | 0.849 | 0.845 | 0.843 | 0.851 |
| 2410 | 0.848 | 0.844 | 0.843 | 0.847 |
| 2420 | 0.845 | 0.840 | 0.837 | 0.845 |
| 2430 | 0.847 | 0.843 | 0.846 | 0.848 |
| 2440 | 0.857 | 0.853 | 0.857 | 0.858 |
| 2450 | 0.856 | 0.852 | 0.854 | 0.855 |
| 2460 | 0.845 | 0.840 | 0.834 | 0.846 |
| 2470 | 0.846 | 0.842 | 0.847 | 0.846 |
| 2480 | 0.853 | 0.849 | 0.850 | 0.852 |
| 2490 | 0.843 | 0.839 | 0.831 | 0.842 |
| 2500 | 0.861 | 0.857 | 0.853 | 0.862 |
| 2510 | 0.840 | 0.836 | 0.829 | 0.841 |
| 2520 | 0.837 | 0.833 | 0.830 | 0.839 |
| 2530 | 0.839 | 0.835 | 0.829 | 0.839 |
| 2540 | 0.847 | 0.843 | 0.829 | 0.847 |
| 2550 | 0.847 | 0.843 | 0.842 | 0.847 |
| 2560 | 0.864 | 0.860 | 0.859 | 0.863 |
| 2570 | 0.847 | 0.842 | 0.845 | 0.847 |
| 2580 | 0.848 | 0.844 | 0.840 | 0.849 |
| 2590 | 0.849 | 0.845 | 0.838 | 0.849 |
| 2600 | 0.857 | 0.853 | 0.849 | 0.857 |
| 2610 | 0.859 | 0.855 | 0.843 | 0.861 |
| 2620 | 0.858 | 0.854 | 0.856 | 0.858 |
| 2630 | 0.852 | 0.848 | 0.846 | 0.851 |
| 2640 | 0.847 | 0.843 | 0.839 | 0.849 |
| 2650 | 0.842 | 0.838 | 0.836 | 0.842 |
| 2660 | 0.834 | 0.829 | 0.828 | 0.833 |
| 2670 | 0.850 | 0.846 | 0.852 | 0.851 |
| 2680 | 0.853 | 0.849 | 0.849 | 0.854 |

|      |       |       |       |       |
|------|-------|-------|-------|-------|
| 2690 | 0.852 | 0.848 | 0.849 | 0.853 |
| 2700 | 0.846 | 0.842 | 0.845 | 0.846 |
| 2710 | 0.851 | 0.847 | 0.846 | 0.852 |
| 2720 | 0.857 | 0.853 | 0.859 | 0.858 |
| 2730 | 0.845 | 0.840 | 0.830 | 0.845 |
| 2740 | 0.845 | 0.841 | 0.837 | 0.844 |
| 2750 | 0.848 | 0.844 | 0.841 | 0.847 |
| 2760 | 0.849 | 0.845 | 0.843 | 0.848 |
| 2770 | 0.856 | 0.852 | 0.847 | 0.855 |
| 2780 | 0.842 | 0.838 | 0.834 | 0.844 |
| 2790 | 0.836 | 0.831 | 0.827 | 0.836 |
| 2800 | 0.845 | 0.840 | 0.834 | 0.845 |
| 2810 | 0.836 | 0.831 | 0.832 | 0.838 |
| 2820 | 0.834 | 0.829 | 0.822 | 0.834 |
| 2830 | 0.845 | 0.841 | 0.848 | 0.846 |
| 2840 | 0.856 | 0.852 | 0.841 | 0.857 |
| 2850 | 0.840 | 0.835 | 0.831 | 0.839 |
| 2860 | 0.841 | 0.837 | 0.826 | 0.842 |
| 2870 | 0.850 | 0.846 | 0.843 | 0.852 |
| 2880 | 0.845 | 0.841 | 0.835 | 0.846 |
| 2890 | 0.840 | 0.836 | 0.844 | 0.840 |
| 2900 | 0.833 | 0.828 | 0.827 | 0.833 |
| 2910 | 0.841 | 0.837 | 0.831 | 0.841 |
| 2920 | 0.855 | 0.851 | 0.842 | 0.856 |
| 2930 | 0.844 | 0.840 | 0.831 | 0.844 |
| 2940 | 0.855 | 0.851 | 0.842 | 0.856 |
| 2950 | 0.849 | 0.845 | 0.844 | 0.850 |
| 2960 | 0.857 | 0.853 | 0.849 | 0.858 |
| 2970 | 0.842 | 0.837 | 0.832 | 0.841 |
| 2980 | 0.839 | 0.835 | 0.828 | 0.839 |
| 2990 | 0.844 | 0.840 | 0.838 | 0.844 |
| 3000 | 0.826 | 0.821 | 0.819 | 0.826 |
| 3010 | 0.839 | 0.835 | 0.837 | 0.839 |
| 3020 | 0.849 | 0.845 | 0.846 | 0.850 |
| 3030 | 0.834 | 0.829 | 0.832 | 0.834 |
| 3040 | 0.850 | 0.846 | 0.845 | 0.851 |
| 3050 | 0.859 | 0.856 | 0.855 | 0.861 |
| 3060 | 0.839 | 0.835 | 0.836 | 0.840 |
| 3070 | 0.851 | 0.847 | 0.847 | 0.851 |
| 3080 | 0.852 | 0.848 | 0.838 | 0.853 |
| 3090 | 0.849 | 0.845 | 0.832 | 0.849 |
| 3100 | 0.830 | 0.826 | 0.825 | 0.831 |
| 3110 | 0.842 | 0.838 | 0.834 | 0.843 |

|      |       |       |       |       |
|------|-------|-------|-------|-------|
| 3120 | 0.832 | 0.828 | 0.826 | 0.832 |
| 3130 | 0.840 | 0.835 | 0.828 | 0.840 |
| 3140 | 0.846 | 0.842 | 0.838 | 0.846 |
| 3150 | 0.845 | 0.841 | 0.844 | 0.846 |
| 3160 | 0.831 | 0.826 | 0.819 | 0.832 |
| 3170 | 0.849 | 0.845 | 0.840 | 0.849 |
| 3180 | 0.840 | 0.835 | 0.838 | 0.840 |
| 3190 | 0.857 | 0.853 | 0.855 | 0.858 |
| 3200 | 0.847 | 0.842 | 0.843 | 0.847 |
| 3210 | 0.835 | 0.830 | 0.826 | 0.835 |
| 3220 | 0.835 | 0.830 | 0.836 | 0.834 |
| 3230 | 0.844 | 0.840 | 0.836 | 0.843 |
| 3240 | 0.840 | 0.836 | 0.834 | 0.841 |
| 3250 | 0.847 | 0.843 | 0.846 | 0.846 |
| 3260 | 0.851 | 0.847 | 0.841 | 0.850 |
| 3270 | 0.847 | 0.842 | 0.840 | 0.845 |
| 3280 | 0.860 | 0.856 | 0.861 | 0.860 |
| 3290 | 0.845 | 0.840 | 0.828 | 0.846 |
| 3300 | 0.846 | 0.842 | 0.847 | 0.845 |
| 3310 | 0.845 | 0.841 | 0.841 | 0.846 |
| 3320 | 0.844 | 0.840 | 0.838 | 0.844 |
| 3330 | 0.851 | 0.846 | 0.840 | 0.850 |
| 3340 | 0.843 | 0.839 | 0.833 | 0.845 |
| 3350 | 0.834 | 0.829 | 0.826 | 0.836 |
| 3360 | 0.844 | 0.840 | 0.839 | 0.845 |
| 3370 | 0.850 | 0.846 | 0.846 | 0.851 |
| 3380 | 0.856 | 0.852 | 0.841 | 0.857 |
| 3390 | 0.840 | 0.835 | 0.823 | 0.840 |
| 3400 | 0.838 | 0.834 | 0.836 | 0.839 |
| 3410 | 0.848 | 0.844 | 0.841 | 0.848 |
| 3420 | 0.839 | 0.835 | 0.842 | 0.841 |
| 3430 | 0.824 | 0.820 | 0.811 | 0.824 |
| 3440 | 0.851 | 0.847 | 0.835 | 0.852 |
| 3450 | 0.838 | 0.833 | 0.822 | 0.838 |
| 3460 | 0.847 | 0.842 | 0.840 | 0.846 |
| 3470 | 0.859 | 0.855 | 0.856 | 0.860 |
| 3480 | 0.849 | 0.844 | 0.848 | 0.849 |
| 3490 | 0.841 | 0.837 | 0.823 | 0.842 |
| 3500 | 0.851 | 0.847 | 0.834 | 0.852 |
| 3510 | 0.831 | 0.826 | 0.830 | 0.833 |
| 3520 | 0.837 | 0.833 | 0.829 | 0.836 |
| 3530 | 0.842 | 0.838 | 0.837 | 0.841 |
| 3540 | 0.851 | 0.847 | 0.849 | 0.852 |

|      |       |       |       |       |
|------|-------|-------|-------|-------|
| 3550 | 0.836 | 0.831 | 0.830 | 0.836 |
| 3560 | 0.840 | 0.836 | 0.840 | 0.843 |
| 3570 | 0.823 | 0.819 | 0.822 | 0.824 |
| 3580 | 0.848 | 0.844 | 0.848 | 0.848 |
| 3590 | 0.851 | 0.847 | 0.842 | 0.852 |
| 3600 | 0.843 | 0.839 | 0.826 | 0.844 |
| 3610 | 0.859 | 0.855 | 0.851 | 0.860 |
| 3620 | 0.840 | 0.836 | 0.832 | 0.841 |
| 3630 | 0.851 | 0.847 | 0.843 | 0.852 |
| 3640 | 0.851 | 0.847 | 0.850 | 0.851 |
| 3650 | 0.846 | 0.842 | 0.835 | 0.846 |
| 3660 | 0.848 | 0.844 | 0.849 | 0.846 |
| 3670 | 0.860 | 0.856 | 0.857 | 0.861 |
| 3680 | 0.853 | 0.849 | 0.848 | 0.854 |
| 3690 | 0.847 | 0.843 | 0.844 | 0.848 |
| 3700 | 0.838 | 0.833 | 0.838 | 0.838 |
| 3710 | 0.852 | 0.848 | 0.850 | 0.852 |
| 3720 | 0.856 | 0.852 | 0.855 | 0.857 |
| 3730 | 0.823 | 0.819 | 0.816 | 0.824 |
| 3740 | 0.836 | 0.832 | 0.836 | 0.837 |
| 3750 | 0.850 | 0.846 | 0.848 | 0.848 |
| 3760 | 0.844 | 0.840 | 0.840 | 0.843 |
| 3770 | 0.853 | 0.849 | 0.845 | 0.853 |
| 3780 | 0.844 | 0.840 | 0.834 | 0.845 |
| 3790 | 0.840 | 0.836 | 0.831 | 0.841 |
| 3800 | 0.838 | 0.834 | 0.827 | 0.839 |
| 3810 | 0.843 | 0.839 | 0.838 | 0.845 |
| 3820 | 0.834 | 0.829 | 0.819 | 0.834 |
| 3830 | 0.842 | 0.838 | 0.838 | 0.842 |
| 3840 | 0.838 | 0.833 | 0.834 | 0.837 |
| 3850 | 0.836 | 0.831 | 0.826 | 0.837 |
| 3860 | 0.847 | 0.842 | 0.837 | 0.848 |
| 3870 | 0.837 | 0.832 | 0.832 | 0.839 |
| 3880 | 0.840 | 0.836 | 0.836 | 0.842 |
| 3890 | 0.841 | 0.837 | 0.837 | 0.840 |
| 3900 | 0.868 | 0.864 | 0.861 | 0.868 |
| 3910 | 0.830 | 0.826 | 0.819 | 0.831 |
| 3920 | 0.836 | 0.832 | 0.828 | 0.838 |
| 3930 | 0.838 | 0.834 | 0.822 | 0.838 |
| 3940 | 0.842 | 0.838 | 0.837 | 0.842 |
| 3950 | 0.840 | 0.835 | 0.835 | 0.840 |
| 3960 | 0.846 | 0.842 | 0.841 | 0.846 |
| 3970 | 0.840 | 0.836 | 0.841 | 0.840 |



|      |       |       |       |       |
|------|-------|-------|-------|-------|
| 3980 | 0.849 | 0.845 | 0.841 | 0.850 |
| 3990 | 0.833 | 0.828 | 0.826 | 0.833 |
| 4000 | 0.851 | 0.847 | 0.843 | 0.850 |
| 4010 | 0.851 | 0.847 | 0.849 | 0.852 |
| 4020 | 0.840 | 0.835 | 0.832 | 0.841 |
| 4030 | 0.848 | 0.844 | 0.860 | 0.847 |
| 4040 | 0.860 | 0.856 | 0.845 | 0.861 |
| 4050 | 0.836 | 0.832 | 0.835 | 0.838 |
| 4060 | 0.846 | 0.842 | 0.829 | 0.846 |
| 4070 | 0.851 | 0.847 | 0.839 | 0.853 |
| 4080 | 0.839 | 0.835 | 0.827 | 0.840 |
| 4090 | 0.855 | 0.851 | 0.846 | 0.854 |
| 4100 | 0.847 | 0.842 | 0.851 | 0.847 |
| 4110 | 0.845 | 0.841 | 0.832 | 0.846 |
| 4120 | 0.830 | 0.825 | 0.829 | 0.831 |
| 4130 | 0.833 | 0.829 | 0.831 | 0.834 |
| 4140 | 0.849 | 0.844 | 0.843 | 0.848 |
| 4150 | 0.834 | 0.830 | 0.824 | 0.835 |
| 4160 | 0.843 | 0.839 | 0.838 | 0.844 |
| 4170 | 0.843 | 0.839 | 0.834 | 0.843 |
| 4180 | 0.839 | 0.835 | 0.834 | 0.840 |
| 4190 | 0.827 | 0.822 | 0.831 | 0.827 |
| 4200 | 0.851 | 0.847 | 0.846 | 0.850 |
| 4210 | 0.847 | 0.843 | 0.846 | 0.848 |
| 4220 | 0.844 | 0.840 | 0.832 | 0.844 |
| 4230 | 0.836 | 0.831 | 0.830 | 0.837 |
| 4240 | 0.844 | 0.840 | 0.841 | 0.844 |
| 4250 | 0.839 | 0.835 | 0.833 | 0.838 |
| 4260 | 0.838 | 0.834 | 0.833 | 0.839 |
| 4270 | 0.841 | 0.837 | 0.831 | 0.840 |
| 4280 | 0.844 | 0.840 | 0.839 | 0.844 |
| 4290 | 0.841 | 0.837 | 0.838 | 0.842 |
| 4300 | 0.840 | 0.836 | 0.841 | 0.842 |
| 4310 | 0.845 | 0.841 | 0.842 | 0.846 |
| 4320 | 0.843 | 0.839 | 0.833 | 0.844 |
| 4330 | 0.828 | 0.823 | 0.810 | 0.829 |
| 4340 | 0.838 | 0.834 | 0.834 | 0.838 |
| 4350 | 0.832 | 0.827 | 0.826 | 0.831 |
| 4360 | 0.845 | 0.840 | 0.838 | 0.845 |
| 4370 | 0.847 | 0.842 | 0.845 | 0.845 |
| 4380 | 0.842 | 0.838 | 0.834 | 0.841 |
| 4390 | 0.853 | 0.849 | 0.844 | 0.853 |
| 4400 | 0.862 | 0.858 | 0.856 | 0.863 |

|      |       |       |       |       |
|------|-------|-------|-------|-------|
| 4410 | 0.850 | 0.846 | 0.849 | 0.850 |
| 4420 | 0.840 | 0.836 | 0.839 | 0.842 |
| 4430 | 0.836 | 0.831 | 0.828 | 0.836 |
| 4440 | 0.850 | 0.846 | 0.851 | 0.849 |
| 4450 | 0.839 | 0.835 | 0.842 | 0.840 |
| 4460 | 0.846 | 0.842 | 0.846 | 0.845 |
| 4470 | 0.838 | 0.833 | 0.841 | 0.839 |
| 4480 | 0.842 | 0.838 | 0.837 | 0.841 |
| 4490 | 0.832 | 0.828 | 0.825 | 0.835 |
| 4500 | 0.834 | 0.829 | 0.823 | 0.835 |
| 4510 | 0.851 | 0.847 | 0.843 | 0.853 |
| 4520 | 0.848 | 0.844 | 0.843 | 0.847 |
| 4530 | 0.844 | 0.840 | 0.841 | 0.844 |
| 4540 | 0.847 | 0.843 | 0.846 | 0.847 |
| 4550 | 0.836 | 0.831 | 0.832 | 0.834 |
| 4560 | 0.841 | 0.837 | 0.841 | 0.841 |
| 4570 | 0.828 | 0.823 | 0.824 | 0.828 |
| 4580 | 0.841 | 0.837 | 0.835 | 0.841 |
| 4590 | 0.821 | 0.816 | 0.816 | 0.820 |
| 4600 | 0.839 | 0.835 | 0.841 | 0.840 |
| 4610 | 0.847 | 0.843 | 0.844 | 0.848 |
| 4620 | 0.845 | 0.841 | 0.848 | 0.846 |
| 4630 | 0.845 | 0.841 | 0.841 | 0.847 |
| 4640 | 0.840 | 0.836 | 0.836 | 0.841 |
| 4650 | 0.838 | 0.833 | 0.828 | 0.839 |
| 4660 | 0.832 | 0.828 | 0.823 | 0.833 |
| 4670 | 0.845 | 0.840 | 0.839 | 0.846 |
| 4680 | 0.848 | 0.844 | 0.841 | 0.849 |
| 4690 | 0.836 | 0.832 | 0.824 | 0.837 |
| 4700 | 0.839 | 0.835 | 0.825 | 0.840 |
| 4710 | 0.840 | 0.836 | 0.830 | 0.843 |
| 4720 | 0.842 | 0.837 | 0.841 | 0.841 |
| 4730 | 0.837 | 0.833 | 0.835 | 0.839 |
| 4740 | 0.841 | 0.837 | 0.845 | 0.841 |
| 4750 | 0.838 | 0.834 | 0.840 | 0.838 |
| 4760 | 0.832 | 0.827 | 0.831 | 0.830 |
| 4770 | 0.828 | 0.823 | 0.827 | 0.829 |
| 4780 | 0.838 | 0.834 | 0.829 | 0.840 |
| 4790 | 0.836 | 0.832 | 0.825 | 0.837 |
| 4800 | 0.840 | 0.836 | 0.831 | 0.841 |
| 4810 | 0.834 | 0.830 | 0.827 | 0.834 |
| 4820 | 0.842 | 0.838 | 0.834 | 0.843 |
| 4830 | 0.837 | 0.833 | 0.826 | 0.837 |

|      |       |       |       |       |
|------|-------|-------|-------|-------|
| 4840 | 0.831 | 0.826 | 0.822 | 0.831 |
| 4850 | 0.842 | 0.838 | 0.839 | 0.842 |
| 4860 | 0.828 | 0.823 | 0.829 | 0.828 |
| 4870 | 0.836 | 0.831 | 0.841 | 0.834 |
| 4880 | 0.831 | 0.826 | 0.818 | 0.833 |
| 4890 | 0.846 | 0.842 | 0.844 | 0.845 |
| 4900 | 0.850 | 0.846 | 0.843 | 0.850 |
| 4910 | 0.844 | 0.840 | 0.840 | 0.844 |
| 4920 | 0.859 | 0.855 | 0.857 | 0.858 |
| 4930 | 0.841 | 0.837 | 0.829 | 0.842 |
| 4940 | 0.847 | 0.843 | 0.846 | 0.849 |
| 4950 | 0.841 | 0.837 | 0.836 | 0.842 |
| 4960 | 0.843 | 0.839 | 0.841 | 0.844 |
| 4970 | 0.845 | 0.840 | 0.840 | 0.845 |
| 4980 | 0.837 | 0.833 | 0.826 | 0.838 |
| 4990 | 0.815 | 0.810 | 0.808 | 0.815 |
| 5000 | 0.841 | 0.837 | 0.837 | 0.841 |
| 5010 | 0.830 | 0.826 | 0.823 | 0.831 |
| 5020 | 0.830 | 0.826 | 0.822 | 0.832 |
| 5030 | 0.836 | 0.831 | 0.830 | 0.836 |
| 5040 | 0.838 | 0.833 | 0.823 | 0.840 |
| 5050 | 0.836 | 0.832 | 0.832 | 0.837 |
| 5060 | 0.836 | 0.831 | 0.828 | 0.837 |
| 5070 | 0.851 | 0.847 | 0.844 | 0.852 |
| 5080 | 0.835 | 0.830 | 0.833 | 0.834 |
| 5090 | 0.845 | 0.840 | 0.843 | 0.846 |
| 5100 | 0.849 | 0.844 | 0.844 | 0.849 |
| 5110 | 0.856 | 0.852 | 0.854 | 0.856 |
| 5120 | 0.845 | 0.841 | 0.834 | 0.846 |
| 5130 | 0.844 | 0.840 | 0.840 | 0.844 |
| 5140 | 0.830 | 0.826 | 0.824 | 0.832 |
| 5150 | 0.842 | 0.838 | 0.829 | 0.843 |
| 5160 | 0.836 | 0.832 | 0.817 | 0.838 |
| 5170 | 0.837 | 0.833 | 0.837 | 0.837 |
| 5180 | 0.845 | 0.840 | 0.843 | 0.845 |
| 5190 | 0.866 | 0.862 | 0.865 | 0.865 |
| 5200 | 0.841 | 0.837 | 0.851 | 0.841 |
| 5210 | 0.838 | 0.834 | 0.831 | 0.837 |
| 5220 | 0.847 | 0.842 | 0.844 | 0.847 |
| 5230 | 0.841 | 0.837 | 0.833 | 0.842 |
| 5240 | 0.846 | 0.842 | 0.842 | 0.845 |
| 5250 | 0.845 | 0.840 | 0.836 | 0.844 |
| 5260 | 0.841 | 0.837 | 0.834 | 0.841 |

|      |       |       |       |       |
|------|-------|-------|-------|-------|
| 5270 | 0.837 | 0.833 | 0.827 | 0.840 |
| 5280 | 0.838 | 0.834 | 0.837 | 0.839 |
| 5290 | 0.841 | 0.837 | 0.841 | 0.840 |
| 5300 | 0.834 | 0.830 | 0.827 | 0.836 |
| 5310 | 0.843 | 0.839 | 0.835 | 0.843 |
| 5320 | 0.840 | 0.836 | 0.831 | 0.840 |
| 5330 | 0.856 | 0.852 | 0.850 | 0.858 |
| 5340 | 0.844 | 0.840 | 0.838 | 0.844 |
| 5350 | 0.841 | 0.837 | 0.840 | 0.840 |
| 5360 | 0.832 | 0.828 | 0.828 | 0.832 |
| 5370 | 0.835 | 0.831 | 0.825 | 0.835 |
| 5380 | 0.843 | 0.839 | 0.836 | 0.845 |
| 5390 | 0.857 | 0.853 | 0.848 | 0.857 |
| 5400 | 0.838 | 0.834 | 0.829 | 0.838 |
| 5410 | 0.847 | 0.842 | 0.841 | 0.847 |
| 5420 | 0.842 | 0.838 | 0.829 | 0.843 |
| 5430 | 0.830 | 0.826 | 0.828 | 0.831 |
| 5440 | 0.844 | 0.839 | 0.840 | 0.843 |
| 5450 | 0.854 | 0.850 | 0.851 | 0.855 |
| 5460 | 0.836 | 0.831 | 0.833 | 0.838 |
| 5470 | 0.830 | 0.826 | 0.818 | 0.830 |
| 5480 | 0.857 | 0.853 | 0.854 | 0.855 |
| 5490 | 0.836 | 0.831 | 0.828 | 0.837 |
| 5500 | 0.842 | 0.838 | 0.846 | 0.842 |
| 5510 | 0.837 | 0.833 | 0.823 | 0.838 |
| 5520 | 0.835 | 0.830 | 0.835 | 0.836 |
| 5530 | 0.843 | 0.839 | 0.836 | 0.844 |
| 5540 | 0.842 | 0.838 | 0.837 | 0.842 |
| 5550 | 0.845 | 0.840 | 0.843 | 0.846 |
| 5560 | 0.831 | 0.826 | 0.819 | 0.832 |
| 5570 | 0.853 | 0.849 | 0.851 | 0.853 |
| 5580 | 0.854 | 0.850 | 0.854 | 0.854 |
| 5590 | 0.856 | 0.852 | 0.854 | 0.857 |
| 5600 | 0.831 | 0.826 | 0.822 | 0.832 |
| 5610 | 0.845 | 0.840 | 0.835 | 0.845 |
| 5620 | 0.851 | 0.847 | 0.841 | 0.852 |
| 5630 | 0.841 | 0.837 | 0.838 | 0.841 |
| 5640 | 0.843 | 0.839 | 0.836 | 0.843 |
| 5650 | 0.823 | 0.819 | 0.816 | 0.825 |
| 5660 | 0.842 | 0.838 | 0.838 | 0.844 |
| 5670 | 0.853 | 0.849 | 0.848 | 0.853 |
| 5680 | 0.832 | 0.828 | 0.833 | 0.833 |
| 5690 | 0.842 | 0.838 | 0.832 | 0.842 |

|      |       |       |       |       |
|------|-------|-------|-------|-------|
| 5700 | 0.833 | 0.829 | 0.826 | 0.835 |
| 5710 | 0.850 | 0.846 | 0.842 | 0.850 |
| 5720 | 0.838 | 0.834 | 0.829 | 0.839 |
| 5730 | 0.853 | 0.849 | 0.839 | 0.853 |
| 5740 | 0.842 | 0.837 | 0.844 | 0.842 |
| 5750 | 0.847 | 0.843 | 0.834 | 0.847 |
| 5760 | 0.837 | 0.833 | 0.838 | 0.838 |
| 5770 | 0.845 | 0.841 | 0.838 | 0.846 |
| 5780 | 0.845 | 0.841 | 0.836 | 0.845 |
| 5790 | 0.828 | 0.824 | 0.826 | 0.830 |
| 5800 | 0.848 | 0.844 | 0.836 | 0.849 |
| 5810 | 0.845 | 0.840 | 0.843 | 0.845 |
| 5820 | 0.832 | 0.827 | 0.820 | 0.832 |
| 5830 | 0.836 | 0.832 | 0.834 | 0.838 |
| 5840 | 0.840 | 0.836 | 0.839 | 0.840 |
| 5850 | 0.840 | 0.836 | 0.834 | 0.841 |
| 5860 | 0.845 | 0.840 | 0.835 | 0.845 |
| 5870 | 0.847 | 0.843 | 0.841 | 0.847 |
| 5880 | 0.840 | 0.835 | 0.831 | 0.840 |
| 5890 | 0.841 | 0.837 | 0.839 | 0.842 |
| 5900 | 0.845 | 0.841 | 0.846 | 0.847 |
| 5910 | 0.842 | 0.838 | 0.841 | 0.843 |
| 5920 | 0.825 | 0.820 | 0.814 | 0.825 |
| 5930 | 0.845 | 0.840 | 0.837 | 0.845 |
| 5940 | 0.834 | 0.830 | 0.830 | 0.835 |
| 5950 | 0.844 | 0.840 | 0.836 | 0.842 |
| 5960 | 0.840 | 0.835 | 0.839 | 0.839 |
| 5970 | 0.837 | 0.833 | 0.833 | 0.837 |
| 5980 | 0.854 | 0.850 | 0.846 | 0.854 |
| 5990 | 0.839 | 0.835 | 0.840 | 0.839 |
| 6000 | 0.844 | 0.840 | 0.840 | 0.845 |
| 6010 | 0.857 | 0.853 | 0.840 | 0.857 |
| 6020 | 0.832 | 0.828 | 0.824 | 0.832 |
| 6030 | 0.830 | 0.826 | 0.823 | 0.831 |
| 6040 | 0.834 | 0.829 | 0.829 | 0.834 |
| 6050 | 0.840 | 0.835 | 0.829 | 0.841 |
| 6060 | 0.837 | 0.833 | 0.837 | 0.837 |
| 6070 | 0.851 | 0.847 | 0.849 | 0.851 |
| 6080 | 0.842 | 0.838 | 0.836 | 0.841 |
| 6090 | 0.837 | 0.833 | 0.834 | 0.838 |
| 6100 | 0.847 | 0.842 | 0.835 | 0.848 |
| 6110 | 0.838 | 0.834 | 0.832 | 0.838 |
| 6120 | 0.840 | 0.836 | 0.836 | 0.841 |

|      |       |       |       |       |
|------|-------|-------|-------|-------|
| 6130 | 0.847 | 0.842 | 0.842 | 0.848 |
| 6140 | 0.838 | 0.834 | 0.838 | 0.839 |
| 6150 | 0.855 | 0.851 | 0.850 | 0.855 |
| 6160 | 0.838 | 0.833 | 0.839 | 0.837 |
| 6170 | 0.847 | 0.842 | 0.845 | 0.847 |
| 6180 | 0.835 | 0.831 | 0.829 | 0.836 |
| 6190 | 0.847 | 0.842 | 0.849 | 0.849 |
| 6200 | 0.838 | 0.833 | 0.836 | 0.838 |
| 6210 | 0.834 | 0.829 | 0.832 | 0.836 |
| 6220 | 0.840 | 0.836 | 0.830 | 0.841 |
| 6230 | 0.833 | 0.828 | 0.829 | 0.832 |
| 6240 | 0.834 | 0.830 | 0.833 | 0.834 |
| 6250 | 0.827 | 0.822 | 0.824 | 0.827 |
| 6260 | 0.849 | 0.844 | 0.849 | 0.849 |
| 6270 | 0.853 | 0.849 | 0.847 | 0.853 |
| 6280 | 0.844 | 0.840 | 0.837 | 0.844 |
| 6290 | 0.855 | 0.851 | 0.850 | 0.856 |
| 6300 | 0.834 | 0.830 | 0.835 | 0.835 |
| 6310 | 0.844 | 0.840 | 0.842 | 0.845 |
| 6320 | 0.851 | 0.847 | 0.846 | 0.851 |
| 6330 | 0.835 | 0.831 | 0.847 | 0.836 |
| 6340 | 0.840 | 0.836 | 0.840 | 0.841 |
| 6350 | 0.839 | 0.835 | 0.830 | 0.840 |
| 6360 | 0.837 | 0.833 | 0.827 | 0.837 |
| 6370 | 0.840 | 0.835 | 0.831 | 0.841 |
| 6380 | 0.831 | 0.826 | 0.834 | 0.832 |
| 6390 | 0.847 | 0.842 | 0.829 | 0.848 |
| 6400 | 0.819 | 0.815 | 0.820 | 0.822 |
| 6410 | 0.835 | 0.830 | 0.827 | 0.837 |
| 6420 | 0.830 | 0.826 | 0.827 | 0.832 |
| 6430 | 0.853 | 0.849 | 0.847 | 0.854 |
| 6440 | 0.848 | 0.844 | 0.847 | 0.847 |
| 6450 | 0.846 | 0.842 | 0.843 | 0.846 |
| 6460 | 0.847 | 0.843 | 0.843 | 0.848 |
| 6470 | 0.845 | 0.840 | 0.843 | 0.844 |
| 6480 | 0.842 | 0.837 | 0.839 | 0.842 |
| 6490 | 0.847 | 0.843 | 0.843 | 0.847 |
| 6500 | 0.849 | 0.845 | 0.849 | 0.848 |
| 6510 | 0.849 | 0.844 | 0.836 | 0.849 |
| 6520 | 0.836 | 0.832 | 0.821 | 0.836 |
| 6530 | 0.847 | 0.843 | 0.835 | 0.847 |
| 6540 | 0.851 | 0.847 | 0.848 | 0.851 |
| 6550 | 0.851 | 0.847 | 0.850 | 0.851 |

|      |       |       |       |       |
|------|-------|-------|-------|-------|
| 6560 | 0.841 | 0.837 | 0.832 | 0.841 |
| 6570 | 0.849 | 0.844 | 0.847 | 0.850 |
| 6580 | 0.858 | 0.854 | 0.855 | 0.858 |
| 6590 | 0.844 | 0.840 | 0.841 | 0.844 |
| 6600 | 0.847 | 0.843 | 0.837 | 0.848 |
| 6610 | 0.848 | 0.844 | 0.851 | 0.849 |
| 6620 | 0.830 | 0.825 | 0.834 | 0.830 |
| 6630 | 0.840 | 0.836 | 0.837 | 0.841 |
| 6640 | 0.839 | 0.835 | 0.841 | 0.840 |
| 6650 | 0.830 | 0.826 | 0.824 | 0.831 |
| 6660 | 0.849 | 0.845 | 0.851 | 0.849 |
| 6670 | 0.829 | 0.824 | 0.811 | 0.830 |
| 6680 | 0.832 | 0.827 | 0.829 | 0.830 |
| 6690 | 0.839 | 0.835 | 0.833 | 0.839 |
| 6700 | 0.838 | 0.833 | 0.832 | 0.838 |
| 6710 | 0.836 | 0.831 | 0.827 | 0.836 |
| 6720 | 0.837 | 0.833 | 0.834 | 0.837 |
| 6730 | 0.834 | 0.829 | 0.833 | 0.834 |
| 6740 | 0.836 | 0.832 | 0.836 | 0.838 |
| 6750 | 0.841 | 0.837 | 0.835 | 0.841 |
| 6760 | 0.855 | 0.851 | 0.862 | 0.855 |
| 6770 | 0.849 | 0.845 | 0.836 | 0.850 |
| 6780 | 0.823 | 0.819 | 0.816 | 0.825 |
| 6790 | 0.833 | 0.829 | 0.831 | 0.833 |
| 6800 | 0.838 | 0.833 | 0.830 | 0.839 |
| 6810 | 0.838 | 0.834 | 0.836 | 0.839 |
| 6820 | 0.836 | 0.831 | 0.829 | 0.836 |
| 6830 | 0.826 | 0.821 | 0.828 | 0.826 |
| 6840 | 0.834 | 0.829 | 0.831 | 0.834 |
| 6850 | 0.840 | 0.835 | 0.835 | 0.839 |
| 6860 | 0.828 | 0.824 | 0.825 | 0.828 |
| 6870 | 0.837 | 0.833 | 0.829 | 0.838 |
| 6880 | 0.832 | 0.828 | 0.830 | 0.833 |
| 6890 | 0.840 | 0.836 | 0.839 | 0.840 |
| 6900 | 0.841 | 0.837 | 0.837 | 0.841 |
| 6910 | 0.849 | 0.845 | 0.840 | 0.850 |
| 6920 | 0.840 | 0.835 | 0.836 | 0.840 |
| 6930 | 0.842 | 0.838 | 0.844 | 0.842 |
| 6940 | 0.836 | 0.832 | 0.827 | 0.836 |
| 6950 | 0.833 | 0.829 | 0.830 | 0.835 |
| 6960 | 0.830 | 0.825 | 0.835 | 0.830 |
| 6970 | 0.832 | 0.828 | 0.826 | 0.833 |
| 6980 | 0.844 | 0.840 | 0.836 | 0.844 |

|      |       |       |       |       |
|------|-------|-------|-------|-------|
| 6990 | 0.837 | 0.833 | 0.840 | 0.836 |
| 7000 | 0.838 | 0.833 | 0.825 | 0.839 |
| 7010 | 0.836 | 0.832 | 0.834 | 0.837 |
| 7020 | 0.837 | 0.833 | 0.832 | 0.837 |
| 7030 | 0.841 | 0.837 | 0.832 | 0.844 |
| 7040 | 0.849 | 0.845 | 0.840 | 0.849 |
| 7050 | 0.849 | 0.845 | 0.840 | 0.850 |
| 7060 | 0.842 | 0.838 | 0.842 | 0.842 |
| 7070 | 0.846 | 0.842 | 0.848 | 0.845 |
| 7080 | 0.854 | 0.850 | 0.852 | 0.856 |
| 7090 | 0.836 | 0.831 | 0.825 | 0.837 |
| 7100 | 0.833 | 0.828 | 0.832 | 0.833 |
| 7110 | 0.846 | 0.842 | 0.838 | 0.847 |
| 7120 | 0.848 | 0.844 | 0.841 | 0.849 |
| 7130 | 0.836 | 0.831 | 0.828 | 0.835 |
| 7140 | 0.849 | 0.845 | 0.844 | 0.851 |
| 7150 | 0.834 | 0.829 | 0.831 | 0.835 |
| 7160 | 0.857 | 0.853 | 0.863 | 0.857 |
| 7170 | 0.847 | 0.843 | 0.850 | 0.847 |
| 7180 | 0.837 | 0.833 | 0.837 | 0.838 |
| 7190 | 0.836 | 0.832 | 0.828 | 0.837 |
| 7200 | 0.837 | 0.833 | 0.833 | 0.838 |
| 7210 | 0.831 | 0.826 | 0.829 | 0.831 |
| 7220 | 0.847 | 0.843 | 0.843 | 0.848 |
| 7230 | 0.846 | 0.842 | 0.839 | 0.847 |
| 7240 | 0.838 | 0.834 | 0.837 | 0.839 |
| 7250 | 0.842 | 0.838 | 0.826 | 0.844 |
| 7260 | 0.844 | 0.840 | 0.837 | 0.844 |
| 7270 | 0.850 | 0.846 | 0.849 | 0.850 |
| 7280 | 0.834 | 0.829 | 0.821 | 0.835 |
| 7290 | 0.834 | 0.829 | 0.832 | 0.835 |
| 7300 | 0.834 | 0.829 | 0.826 | 0.835 |
| 7310 | 0.842 | 0.838 | 0.833 | 0.844 |
| 7320 | 0.837 | 0.833 | 0.832 | 0.837 |
| 7330 | 0.838 | 0.833 | 0.832 | 0.840 |
| 7340 | 0.851 | 0.847 | 0.846 | 0.851 |
| 7350 | 0.836 | 0.832 | 0.834 | 0.836 |
| 7360 | 0.854 | 0.850 | 0.851 | 0.855 |
| 7370 | 0.838 | 0.834 | 0.831 | 0.841 |
| 7380 | 0.845 | 0.840 | 0.839 | 0.846 |
| 7390 | 0.846 | 0.842 | 0.848 | 0.846 |
| 7400 | 0.838 | 0.834 | 0.832 | 0.839 |
| 7410 | 0.845 | 0.841 | 0.848 | 0.846 |



|      |       |       |       |       |
|------|-------|-------|-------|-------|
| 7420 | 0.823 | 0.818 | 0.815 | 0.826 |
| 7430 | 0.844 | 0.840 | 0.837 | 0.845 |
| 7440 | 0.844 | 0.840 | 0.840 | 0.845 |
| 7450 | 0.828 | 0.824 | 0.827 | 0.827 |
| 7460 | 0.845 | 0.841 | 0.847 | 0.845 |
| 7470 | 0.839 | 0.835 | 0.843 | 0.839 |
| 7480 | 0.827 | 0.822 | 0.819 | 0.827 |
| 7490 | 0.841 | 0.837 | 0.834 | 0.842 |
| 7500 | 0.849 | 0.845 | 0.842 | 0.850 |
| 7510 | 0.831 | 0.826 | 0.819 | 0.831 |
| 7520 | 0.836 | 0.831 | 0.826 | 0.836 |
| 7530 | 0.834 | 0.830 | 0.836 | 0.835 |
| 7540 | 0.845 | 0.841 | 0.835 | 0.845 |
| 7550 | 0.833 | 0.829 | 0.825 | 0.833 |
| 7560 | 0.836 | 0.832 | 0.832 | 0.838 |
| 7570 | 0.853 | 0.849 | 0.843 | 0.853 |
| 7580 | 0.833 | 0.829 | 0.826 | 0.835 |
| 7590 | 0.847 | 0.842 | 0.842 | 0.848 |
| 7600 | 0.834 | 0.830 | 0.826 | 0.835 |
| 7610 | 0.855 | 0.852 | 0.852 | 0.855 |
| 7620 | 0.835 | 0.831 | 0.831 | 0.837 |
| 7630 | 0.856 | 0.852 | 0.861 | 0.855 |
| 7640 | 0.836 | 0.832 | 0.835 | 0.836 |
| 7650 | 0.845 | 0.841 | 0.844 | 0.844 |
| 7660 | 0.840 | 0.835 | 0.838 | 0.841 |
| 7670 | 0.835 | 0.831 | 0.825 | 0.836 |
| 7680 | 0.837 | 0.833 | 0.831 | 0.837 |
| 7690 | 0.845 | 0.841 | 0.834 | 0.846 |
| 7700 | 0.834 | 0.829 | 0.832 | 0.835 |
| 7710 | 0.828 | 0.823 | 0.825 | 0.829 |
| 7720 | 0.840 | 0.835 | 0.825 | 0.841 |
| 7730 | 0.843 | 0.839 | 0.841 | 0.844 |
| 7740 | 0.823 | 0.818 | 0.827 | 0.822 |
| 7750 | 0.838 | 0.834 | 0.837 | 0.840 |
| 7760 | 0.833 | 0.828 | 0.829 | 0.833 |
| 7770 | 0.830 | 0.825 | 0.821 | 0.830 |
| 7780 | 0.823 | 0.818 | 0.814 | 0.825 |
| 7790 | 0.837 | 0.833 | 0.829 | 0.837 |
| 7800 | 0.843 | 0.839 | 0.844 | 0.844 |
| 7810 | 0.841 | 0.837 | 0.827 | 0.841 |
| 7820 | 0.839 | 0.835 | 0.826 | 0.841 |
| 7830 | 0.842 | 0.838 | 0.839 | 0.843 |
| 7840 | 0.849 | 0.844 | 0.844 | 0.848 |

|      |       |       |       |       |
|------|-------|-------|-------|-------|
| 7850 | 0.840 | 0.836 | 0.828 | 0.842 |
| 7860 | 0.841 | 0.837 | 0.832 | 0.840 |
| 7870 | 0.842 | 0.838 | 0.833 | 0.844 |
| 7880 | 0.834 | 0.830 | 0.825 | 0.835 |
| 7890 | 0.836 | 0.831 | 0.837 | 0.836 |
| 7900 | 0.834 | 0.830 | 0.831 | 0.836 |
| 7910 | 0.835 | 0.831 | 0.836 | 0.834 |
| 7920 | 0.838 | 0.834 | 0.834 | 0.838 |
| 7930 | 0.832 | 0.827 | 0.815 | 0.832 |
| 7940 | 0.842 | 0.838 | 0.831 | 0.843 |
| 7950 | 0.840 | 0.836 | 0.838 | 0.841 |
| 7960 | 0.840 | 0.836 | 0.840 | 0.840 |
| 7970 | 0.842 | 0.838 | 0.835 | 0.843 |
| 7980 | 0.846 | 0.842 | 0.846 | 0.845 |
| 7990 | 0.838 | 0.833 | 0.835 | 0.841 |
| 8000 | 0.840 | 0.836 | 0.832 | 0.841 |
| 8010 | 0.845 | 0.841 | 0.842 | 0.846 |
| 8020 | 0.843 | 0.839 | 0.836 | 0.843 |
| 8030 | 0.834 | 0.829 | 0.818 | 0.834 |
| 8040 | 0.845 | 0.840 | 0.833 | 0.845 |
| 8050 | 0.836 | 0.831 | 0.831 | 0.835 |
| 8060 | 0.827 | 0.822 | 0.826 | 0.829 |
| 8070 | 0.845 | 0.840 | 0.853 | 0.845 |
| 8080 | 0.847 | 0.842 | 0.842 | 0.849 |
| 8090 | 0.847 | 0.843 | 0.834 | 0.847 |
| 8100 | 0.842 | 0.838 | 0.832 | 0.844 |
| 8110 | 0.836 | 0.832 | 0.833 | 0.837 |
| 8120 | 0.827 | 0.822 | 0.821 | 0.829 |
| 8130 | 0.836 | 0.831 | 0.824 | 0.837 |
| 8140 | 0.838 | 0.833 | 0.836 | 0.839 |
| 8150 | 0.845 | 0.841 | 0.840 | 0.846 |
| 8160 | 0.834 | 0.829 | 0.820 | 0.832 |
| 8170 | 0.850 | 0.846 | 0.851 | 0.851 |
| 8180 | 0.838 | 0.833 | 0.839 | 0.839 |
| 8190 | 0.853 | 0.849 | 0.839 | 0.853 |
| 8200 | 0.845 | 0.840 | 0.841 | 0.845 |
| 8210 | 0.849 | 0.845 | 0.848 | 0.848 |
| 8220 | 0.837 | 0.833 | 0.831 | 0.838 |
| 8230 | 0.839 | 0.835 | 0.829 | 0.840 |
| 8240 | 0.834 | 0.829 | 0.831 | 0.834 |
| 8250 | 0.860 | 0.856 | 0.848 | 0.859 |
| 8260 | 0.846 | 0.842 | 0.836 | 0.847 |
| 8270 | 0.840 | 0.835 | 0.836 | 0.842 |

|      |       |       |       |       |
|------|-------|-------|-------|-------|
| 8280 | 0.847 | 0.843 | 0.835 | 0.847 |
| 8290 | 0.848 | 0.844 | 0.845 | 0.849 |
| 8300 | 0.829 | 0.824 | 0.833 | 0.830 |
| 8310 | 0.845 | 0.841 | 0.839 | 0.847 |
| 8320 | 0.838 | 0.834 | 0.833 | 0.838 |
| 8330 | 0.848 | 0.844 | 0.840 | 0.848 |
| 8340 | 0.833 | 0.828 | 0.832 | 0.834 |
| 8350 | 0.848 | 0.844 | 0.840 | 0.848 |
| 8360 | 0.847 | 0.842 | 0.842 | 0.846 |
| 8370 | 0.845 | 0.841 | 0.842 | 0.846 |
| 8380 | 0.838 | 0.834 | 0.830 | 0.840 |
| 8390 | 0.835 | 0.831 | 0.823 | 0.835 |
| 8400 | 0.833 | 0.829 | 0.824 | 0.834 |
| 8410 | 0.830 | 0.826 | 0.825 | 0.830 |
| 8420 | 0.840 | 0.835 | 0.832 | 0.841 |
| 8430 | 0.849 | 0.845 | 0.850 | 0.850 |
| 8440 | 0.833 | 0.828 | 0.823 | 0.833 |
| 8450 | 0.841 | 0.837 | 0.841 | 0.841 |
| 8460 | 0.836 | 0.832 | 0.836 | 0.836 |
| 8470 | 0.841 | 0.837 | 0.840 | 0.842 |
| 8480 | 0.842 | 0.838 | 0.841 | 0.842 |
| 8490 | 0.853 | 0.849 | 0.842 | 0.854 |
| 8500 | 0.843 | 0.839 | 0.840 | 0.844 |
| 8510 | 0.844 | 0.839 | 0.847 | 0.845 |
| 8520 | 0.849 | 0.844 | 0.831 | 0.849 |
| 8530 | 0.842 | 0.838 | 0.838 | 0.843 |
| 8540 | 0.840 | 0.835 | 0.833 | 0.841 |
| 8550 | 0.841 | 0.837 | 0.839 | 0.842 |
| 8560 | 0.842 | 0.838 | 0.842 | 0.840 |
| 8570 | 0.828 | 0.823 | 0.821 | 0.827 |
| 8580 | 0.832 | 0.827 | 0.823 | 0.832 |
| 8590 | 0.829 | 0.824 | 0.825 | 0.829 |
| 8600 | 0.836 | 0.831 | 0.827 | 0.835 |
| 8610 | 0.843 | 0.839 | 0.839 | 0.843 |
| 8620 | 0.840 | 0.835 | 0.838 | 0.841 |
| 8630 | 0.836 | 0.831 | 0.837 | 0.836 |
| 8640 | 0.847 | 0.842 | 0.840 | 0.847 |
| 8650 | 0.834 | 0.830 | 0.828 | 0.835 |
| 8660 | 0.828 | 0.824 | 0.812 | 0.829 |
| 8670 | 0.847 | 0.843 | 0.852 | 0.848 |
| 8680 | 0.848 | 0.844 | 0.847 | 0.847 |
| 8690 | 0.836 | 0.831 | 0.826 | 0.837 |
| 8700 | 0.838 | 0.833 | 0.831 | 0.838 |

|      |       |       |       |       |
|------|-------|-------|-------|-------|
| 8710 | 0.847 | 0.843 | 0.834 | 0.849 |
| 8720 | 0.845 | 0.841 | 0.838 | 0.845 |
| 8730 | 0.822 | 0.817 | 0.827 | 0.823 |
| 8740 | 0.824 | 0.820 | 0.821 | 0.825 |
| 8750 | 0.833 | 0.828 | 0.833 | 0.832 |
| 8760 | 0.834 | 0.830 | 0.829 | 0.836 |
| 8770 | 0.845 | 0.840 | 0.841 | 0.845 |
| 8780 | 0.839 | 0.835 | 0.837 | 0.839 |
| 8790 | 0.845 | 0.841 | 0.841 | 0.845 |
| 8800 | 0.839 | 0.835 | 0.833 | 0.839 |
| 8810 | 0.847 | 0.842 | 0.836 | 0.848 |
| 8820 | 0.840 | 0.836 | 0.837 | 0.842 |
| 8830 | 0.833 | 0.828 | 0.833 | 0.834 |
| 8840 | 0.832 | 0.828 | 0.822 | 0.834 |
| 8850 | 0.846 | 0.842 | 0.832 | 0.847 |
| 8860 | 0.846 | 0.842 | 0.848 | 0.847 |
| 8870 | 0.846 | 0.842 | 0.839 | 0.846 |
| 8880 | 0.828 | 0.824 | 0.818 | 0.829 |
| 8890 | 0.862 | 0.858 | 0.851 | 0.863 |
| 8900 | 0.854 | 0.850 | 0.855 | 0.854 |
| 8910 | 0.847 | 0.842 | 0.841 | 0.847 |
| 8920 | 0.830 | 0.826 | 0.834 | 0.832 |
| 8930 | 0.850 | 0.846 | 0.845 | 0.851 |
| 8940 | 0.845 | 0.841 | 0.845 | 0.846 |
| 8950 | 0.842 | 0.838 | 0.843 | 0.844 |

(5) IFS results with RF on the MCFS feature list

| Number of features | ACC   | MCC   | Macro F1 | Weighted F1 |
|--------------------|-------|-------|----------|-------------|
| 10                 | 0.884 | 0.881 | 0.902    | 0.883       |
| 20                 | 0.954 | 0.953 | 0.959    | 0.954       |
| 30                 | 0.971 | 0.971 | 0.977    | 0.971       |
| 40                 | 0.970 | 0.969 | 0.975    | 0.970       |
| 50                 | 0.975 | 0.974 | 0.981    | 0.974       |
| 60                 | 0.972 | 0.971 | 0.978    | 0.972       |
| 70                 | 0.974 | 0.973 | 0.976    | 0.973       |
| 80                 | 0.971 | 0.971 | 0.976    | 0.971       |
| 90                 | 0.975 | 0.974 | 0.979    | 0.975       |
| 100                | 0.973 | 0.972 | 0.976    | 0.973       |
| 110                | 0.976 | 0.975 | 0.979    | 0.975       |
| 120                | 0.976 | 0.975 | 0.979    | 0.975       |
| 130                | 0.974 | 0.973 | 0.978    | 0.973       |
| 140                | 0.977 | 0.976 | 0.979    | 0.977       |
| 150                | 0.978 | 0.978 | 0.982    | 0.978       |

|     |       |       |       |       |
|-----|-------|-------|-------|-------|
| 160 | 0.974 | 0.973 | 0.979 | 0.974 |
| 170 | 0.976 | 0.975 | 0.978 | 0.976 |
| 180 | 0.978 | 0.977 | 0.983 | 0.977 |
| 190 | 0.974 | 0.973 | 0.978 | 0.973 |
| 200 | 0.974 | 0.973 | 0.976 | 0.973 |
| 210 | 0.974 | 0.973 | 0.978 | 0.974 |
| 220 | 0.977 | 0.976 | 0.980 | 0.977 |
| 230 | 0.978 | 0.977 | 0.981 | 0.977 |
| 240 | 0.979 | 0.978 | 0.984 | 0.979 |
| 250 | 0.978 | 0.978 | 0.982 | 0.978 |
| 260 | 0.982 | 0.981 | 0.985 | 0.982 |
| 270 | 0.976 | 0.976 | 0.980 | 0.976 |
| 280 | 0.980 | 0.979 | 0.984 | 0.980 |
| 290 | 0.978 | 0.977 | 0.980 | 0.977 |
| 300 | 0.976 | 0.975 | 0.980 | 0.975 |
| 310 | 0.978 | 0.978 | 0.982 | 0.978 |
| 320 | 0.978 | 0.977 | 0.982 | 0.977 |
| 330 | 0.980 | 0.979 | 0.983 | 0.980 |
| 340 | 0.976 | 0.976 | 0.980 | 0.976 |
| 350 | 0.976 | 0.975 | 0.982 | 0.975 |
| 360 | 0.978 | 0.977 | 0.982 | 0.977 |
| 370 | 0.976 | 0.976 | 0.981 | 0.976 |
| 380 | 0.981 | 0.980 | 0.986 | 0.981 |
| 390 | 0.980 | 0.979 | 0.983 | 0.980 |
| 400 | 0.982 | 0.982 | 0.987 | 0.982 |
| 410 | 0.978 | 0.978 | 0.983 | 0.978 |
| 420 | 0.978 | 0.978 | 0.982 | 0.978 |
| 430 | 0.978 | 0.978 | 0.985 | 0.978 |
| 440 | 0.978 | 0.978 | 0.982 | 0.978 |
| 450 | 0.978 | 0.977 | 0.979 | 0.977 |
| 460 | 0.978 | 0.977 | 0.982 | 0.977 |
| 470 | 0.979 | 0.978 | 0.985 | 0.979 |
| 480 | 0.979 | 0.978 | 0.982 | 0.979 |
| 490 | 0.980 | 0.980 | 0.985 | 0.980 |
| 500 | 0.976 | 0.976 | 0.982 | 0.976 |
| 510 | 0.978 | 0.977 | 0.982 | 0.978 |
| 520 | 0.978 | 0.977 | 0.982 | 0.978 |
| 530 | 0.976 | 0.975 | 0.982 | 0.975 |
| 540 | 0.980 | 0.979 | 0.983 | 0.979 |
| 550 | 0.973 | 0.972 | 0.978 | 0.972 |
| 560 | 0.976 | 0.976 | 0.982 | 0.976 |
| 570 | 0.977 | 0.976 | 0.982 | 0.977 |
| 580 | 0.976 | 0.976 | 0.981 | 0.976 |

|      |       |       |       |       |
|------|-------|-------|-------|-------|
| 590  | 0.976 | 0.975 | 0.981 | 0.975 |
| 600  | 0.974 | 0.973 | 0.979 | 0.974 |
| 610  | 0.978 | 0.977 | 0.981 | 0.978 |
| 620  | 0.976 | 0.975 | 0.981 | 0.975 |
| 630  | 0.979 | 0.978 | 0.983 | 0.979 |
| 640  | 0.978 | 0.977 | 0.981 | 0.978 |
| 650  | 0.977 | 0.976 | 0.983 | 0.977 |
| 660  | 0.976 | 0.976 | 0.981 | 0.976 |
| 670  | 0.977 | 0.976 | 0.982 | 0.977 |
| 680  | 0.974 | 0.973 | 0.979 | 0.974 |
| 690  | 0.978 | 0.978 | 0.984 | 0.978 |
| 700  | 0.979 | 0.978 | 0.985 | 0.979 |
| 710  | 0.978 | 0.977 | 0.981 | 0.977 |
| 720  | 0.977 | 0.976 | 0.980 | 0.977 |
| 730  | 0.978 | 0.978 | 0.984 | 0.978 |
| 740  | 0.977 | 0.976 | 0.982 | 0.977 |
| 750  | 0.977 | 0.976 | 0.982 | 0.977 |
| 760  | 0.976 | 0.976 | 0.979 | 0.976 |
| 770  | 0.978 | 0.978 | 0.981 | 0.978 |
| 780  | 0.978 | 0.978 | 0.983 | 0.978 |
| 790  | 0.977 | 0.976 | 0.980 | 0.977 |
| 800  | 0.978 | 0.978 | 0.983 | 0.978 |
| 810  | 0.976 | 0.976 | 0.982 | 0.976 |
| 820  | 0.976 | 0.976 | 0.981 | 0.976 |
| 830  | 0.978 | 0.978 | 0.983 | 0.978 |
| 840  | 0.978 | 0.978 | 0.982 | 0.978 |
| 850  | 0.975 | 0.974 | 0.982 | 0.975 |
| 860  | 0.978 | 0.977 | 0.982 | 0.977 |
| 870  | 0.975 | 0.974 | 0.980 | 0.975 |
| 880  | 0.982 | 0.981 | 0.985 | 0.982 |
| 890  | 0.976 | 0.975 | 0.981 | 0.975 |
| 900  | 0.977 | 0.976 | 0.982 | 0.977 |
| 910  | 0.976 | 0.976 | 0.980 | 0.976 |
| 920  | 0.976 | 0.975 | 0.982 | 0.975 |
| 930  | 0.977 | 0.976 | 0.982 | 0.977 |
| 940  | 0.976 | 0.976 | 0.982 | 0.976 |
| 950  | 0.978 | 0.977 | 0.982 | 0.978 |
| 960  | 0.980 | 0.979 | 0.984 | 0.980 |
| 970  | 0.978 | 0.978 | 0.982 | 0.978 |
| 980  | 0.978 | 0.978 | 0.983 | 0.978 |
| 990  | 0.977 | 0.976 | 0.982 | 0.977 |
| 1000 | 0.976 | 0.975 | 0.980 | 0.975 |
| 1010 | 0.976 | 0.975 | 0.981 | 0.976 |

|      |       |       |       |       |
|------|-------|-------|-------|-------|
| 1020 | 0.980 | 0.980 | 0.986 | 0.980 |
| 1030 | 0.978 | 0.977 | 0.983 | 0.977 |
| 1040 | 0.980 | 0.980 | 0.985 | 0.980 |
| 1050 | 0.979 | 0.978 | 0.983 | 0.979 |
| 1060 | 0.982 | 0.982 | 0.986 | 0.982 |
| 1070 | 0.980 | 0.980 | 0.985 | 0.980 |
| 1080 | 0.980 | 0.979 | 0.984 | 0.979 |
| 1090 | 0.982 | 0.982 | 0.986 | 0.982 |
| 1100 | 0.976 | 0.976 | 0.981 | 0.976 |
| 1110 | 0.980 | 0.979 | 0.984 | 0.979 |
| 1120 | 0.982 | 0.981 | 0.986 | 0.982 |
| 1130 | 0.982 | 0.981 | 0.985 | 0.982 |
| 1140 | 0.980 | 0.979 | 0.982 | 0.980 |
| 1150 | 0.980 | 0.979 | 0.983 | 0.980 |
| 1160 | 0.980 | 0.979 | 0.984 | 0.979 |
| 1170 | 0.978 | 0.978 | 0.983 | 0.978 |
| 1180 | 0.978 | 0.978 | 0.982 | 0.978 |
| 1190 | 0.981 | 0.980 | 0.987 | 0.981 |
| 1200 | 0.980 | 0.979 | 0.985 | 0.980 |
| 1210 | 0.981 | 0.980 | 0.986 | 0.981 |
| 1220 | 0.978 | 0.978 | 0.982 | 0.978 |
| 1230 | 0.981 | 0.980 | 0.984 | 0.981 |
| 1240 | 0.976 | 0.976 | 0.980 | 0.976 |
| 1250 | 0.979 | 0.978 | 0.983 | 0.979 |
| 1260 | 0.984 | 0.983 | 0.987 | 0.984 |
| 1270 | 0.978 | 0.978 | 0.983 | 0.978 |
| 1280 | 0.982 | 0.982 | 0.988 | 0.982 |
| 1290 | 0.982 | 0.982 | 0.987 | 0.982 |
| 1300 | 0.976 | 0.976 | 0.982 | 0.976 |
| 1310 | 0.980 | 0.980 | 0.983 | 0.980 |
| 1320 | 0.976 | 0.976 | 0.981 | 0.976 |
| 1330 | 0.976 | 0.976 | 0.981 | 0.976 |
| 1340 | 0.980 | 0.980 | 0.984 | 0.980 |
| 1350 | 0.981 | 0.980 | 0.985 | 0.981 |
| 1360 | 0.980 | 0.980 | 0.985 | 0.980 |
| 1370 | 0.982 | 0.981 | 0.985 | 0.982 |
| 1380 | 0.980 | 0.979 | 0.983 | 0.979 |
| 1390 | 0.978 | 0.978 | 0.982 | 0.978 |
| 1400 | 0.982 | 0.981 | 0.985 | 0.982 |
| 1410 | 0.981 | 0.980 | 0.984 | 0.981 |
| 1420 | 0.982 | 0.981 | 0.985 | 0.981 |
| 1430 | 0.979 | 0.978 | 0.983 | 0.979 |
| 1440 | 0.980 | 0.979 | 0.984 | 0.980 |

|      |       |       |       |       |
|------|-------|-------|-------|-------|
| 1450 | 0.981 | 0.980 | 0.984 | 0.981 |
| 1460 | 0.981 | 0.980 | 0.985 | 0.981 |
| 1470 | 0.980 | 0.980 | 0.984 | 0.980 |
| 1480 | 0.982 | 0.982 | 0.986 | 0.982 |
| 1490 | 0.978 | 0.978 | 0.981 | 0.978 |
| 1500 | 0.979 | 0.978 | 0.984 | 0.979 |
| 1510 | 0.980 | 0.980 | 0.985 | 0.980 |
| 1520 | 0.982 | 0.981 | 0.986 | 0.982 |
| 1530 | 0.979 | 0.978 | 0.983 | 0.979 |
| 1540 | 0.980 | 0.980 | 0.983 | 0.980 |
| 1550 | 0.980 | 0.980 | 0.983 | 0.980 |
| 1560 | 0.980 | 0.979 | 0.985 | 0.979 |
| 1570 | 0.982 | 0.981 | 0.986 | 0.982 |
| 1580 | 0.980 | 0.979 | 0.983 | 0.980 |
| 1590 | 0.982 | 0.981 | 0.986 | 0.982 |
| 1600 | 0.980 | 0.979 | 0.983 | 0.979 |
| 1610 | 0.983 | 0.983 | 0.985 | 0.983 |
| 1620 | 0.980 | 0.980 | 0.984 | 0.980 |
| 1630 | 0.982 | 0.982 | 0.985 | 0.982 |
| 1640 | 0.979 | 0.978 | 0.982 | 0.979 |
| 1650 | 0.981 | 0.980 | 0.985 | 0.981 |
| 1660 | 0.982 | 0.981 | 0.985 | 0.981 |
| 1670 | 0.982 | 0.981 | 0.986 | 0.981 |
| 1680 | 0.982 | 0.982 | 0.986 | 0.982 |
| 1690 | 0.978 | 0.978 | 0.983 | 0.978 |
| 1700 | 0.981 | 0.980 | 0.985 | 0.981 |
| 1710 | 0.979 | 0.978 | 0.984 | 0.979 |
| 1720 | 0.981 | 0.980 | 0.986 | 0.981 |
| 1730 | 0.982 | 0.982 | 0.986 | 0.982 |
| 1740 | 0.980 | 0.979 | 0.983 | 0.980 |
| 1750 | 0.980 | 0.980 | 0.984 | 0.980 |
| 1760 | 0.982 | 0.981 | 0.986 | 0.982 |
| 1770 | 0.980 | 0.980 | 0.984 | 0.980 |
| 1780 | 0.978 | 0.978 | 0.985 | 0.978 |
| 1790 | 0.985 | 0.985 | 0.988 | 0.985 |
| 1800 | 0.980 | 0.979 | 0.982 | 0.980 |
| 1810 | 0.981 | 0.980 | 0.985 | 0.981 |
| 1820 | 0.982 | 0.982 | 0.985 | 0.982 |
| 1830 | 0.980 | 0.980 | 0.984 | 0.980 |
| 1840 | 0.981 | 0.980 | 0.985 | 0.981 |
| 1850 | 0.982 | 0.981 | 0.985 | 0.982 |
| 1860 | 0.982 | 0.982 | 0.986 | 0.982 |
| 1870 | 0.982 | 0.981 | 0.986 | 0.981 |



|      |       |       |       |       |
|------|-------|-------|-------|-------|
| 1880 | 0.982 | 0.982 | 0.987 | 0.982 |
| 1890 | 0.982 | 0.981 | 0.986 | 0.982 |
| 1900 | 0.982 | 0.981 | 0.984 | 0.982 |
| 1910 | 0.982 | 0.982 | 0.986 | 0.982 |
| 1920 | 0.983 | 0.983 | 0.986 | 0.983 |
| 1930 | 0.981 | 0.980 | 0.986 | 0.981 |
| 1940 | 0.984 | 0.984 | 0.987 | 0.984 |
| 1950 | 0.982 | 0.981 | 0.986 | 0.982 |
| 1960 | 0.982 | 0.982 | 0.986 | 0.982 |
| 1970 | 0.981 | 0.980 | 0.986 | 0.981 |
| 1980 | 0.980 | 0.980 | 0.985 | 0.980 |
| 1990 | 0.980 | 0.979 | 0.982 | 0.980 |
| 2000 | 0.980 | 0.979 | 0.982 | 0.980 |
| 2010 | 0.982 | 0.981 | 0.987 | 0.982 |
| 2020 | 0.980 | 0.980 | 0.982 | 0.980 |
| 2030 | 0.981 | 0.980 | 0.984 | 0.981 |
| 2040 | 0.981 | 0.980 | 0.984 | 0.981 |
| 2050 | 0.980 | 0.980 | 0.984 | 0.980 |
| 2060 | 0.984 | 0.983 | 0.987 | 0.984 |
| 2070 | 0.979 | 0.978 | 0.984 | 0.979 |
| 2080 | 0.982 | 0.981 | 0.984 | 0.981 |
| 2090 | 0.981 | 0.980 | 0.984 | 0.981 |
| 2100 | 0.982 | 0.982 | 0.986 | 0.982 |
| 2110 | 0.984 | 0.983 | 0.987 | 0.984 |
| 2120 | 0.980 | 0.980 | 0.985 | 0.980 |
| 2130 | 0.984 | 0.983 | 0.987 | 0.984 |
| 2140 | 0.981 | 0.980 | 0.985 | 0.981 |
| 2150 | 0.982 | 0.981 | 0.984 | 0.982 |
| 2160 | 0.985 | 0.985 | 0.988 | 0.985 |
| 2170 | 0.981 | 0.980 | 0.985 | 0.981 |
| 2180 | 0.983 | 0.983 | 0.987 | 0.983 |
| 2190 | 0.983 | 0.983 | 0.987 | 0.983 |
| 2200 | 0.982 | 0.982 | 0.985 | 0.982 |
| 2210 | 0.981 | 0.980 | 0.985 | 0.981 |
| 2220 | 0.983 | 0.983 | 0.987 | 0.983 |
| 2230 | 0.982 | 0.982 | 0.986 | 0.982 |
| 2240 | 0.979 | 0.978 | 0.985 | 0.979 |
| 2250 | 0.982 | 0.982 | 0.986 | 0.982 |
| 2260 | 0.980 | 0.979 | 0.983 | 0.980 |
| 2270 | 0.978 | 0.977 | 0.982 | 0.977 |
| 2280 | 0.980 | 0.979 | 0.984 | 0.980 |
| 2290 | 0.981 | 0.980 | 0.985 | 0.981 |
| 2300 | 0.982 | 0.981 | 0.985 | 0.982 |

|      |       |       |       |       |
|------|-------|-------|-------|-------|
| 2310 | 0.981 | 0.980 | 0.987 | 0.981 |
| 2320 | 0.981 | 0.980 | 0.985 | 0.981 |
| 2330 | 0.981 | 0.980 | 0.985 | 0.981 |
| 2340 | 0.979 | 0.978 | 0.982 | 0.979 |
| 2350 | 0.980 | 0.979 | 0.983 | 0.979 |
| 2360 | 0.979 | 0.978 | 0.983 | 0.979 |
| 2370 | 0.977 | 0.976 | 0.981 | 0.977 |
| 2380 | 0.976 | 0.976 | 0.982 | 0.976 |
| 2390 | 0.980 | 0.980 | 0.984 | 0.980 |
| 2400 | 0.981 | 0.980 | 0.985 | 0.981 |
| 2410 | 0.982 | 0.981 | 0.985 | 0.982 |
| 2420 | 0.982 | 0.982 | 0.985 | 0.982 |
| 2430 | 0.982 | 0.982 | 0.988 | 0.982 |
| 2440 | 0.978 | 0.978 | 0.983 | 0.978 |
| 2450 | 0.983 | 0.983 | 0.988 | 0.983 |
| 2460 | 0.982 | 0.981 | 0.985 | 0.982 |
| 2470 | 0.980 | 0.980 | 0.983 | 0.980 |
| 2480 | 0.980 | 0.980 | 0.985 | 0.980 |
| 2490 | 0.982 | 0.981 | 0.984 | 0.982 |
| 2500 | 0.983 | 0.983 | 0.986 | 0.983 |
| 2510 | 0.980 | 0.980 | 0.984 | 0.980 |
| 2520 | 0.982 | 0.982 | 0.986 | 0.982 |
| 2530 | 0.982 | 0.982 | 0.987 | 0.982 |
| 2540 | 0.981 | 0.980 | 0.983 | 0.981 |
| 2550 | 0.978 | 0.978 | 0.983 | 0.978 |
| 2560 | 0.981 | 0.980 | 0.984 | 0.981 |
| 2570 | 0.981 | 0.980 | 0.985 | 0.981 |
| 2580 | 0.980 | 0.979 | 0.985 | 0.980 |
| 2590 | 0.982 | 0.982 | 0.985 | 0.982 |
| 2600 | 0.980 | 0.979 | 0.984 | 0.979 |
| 2610 | 0.979 | 0.978 | 0.984 | 0.979 |
| 2620 | 0.977 | 0.976 | 0.983 | 0.977 |
| 2630 | 0.981 | 0.980 | 0.984 | 0.981 |
| 2640 | 0.981 | 0.980 | 0.986 | 0.981 |
| 2650 | 0.980 | 0.980 | 0.983 | 0.980 |
| 2660 | 0.978 | 0.977 | 0.984 | 0.977 |
| 2670 | 0.978 | 0.978 | 0.983 | 0.978 |
| 2680 | 0.983 | 0.983 | 0.987 | 0.983 |
| 2690 | 0.982 | 0.982 | 0.986 | 0.982 |
| 2700 | 0.979 | 0.978 | 0.982 | 0.979 |
| 2710 | 0.982 | 0.981 | 0.986 | 0.982 |
| 2720 | 0.982 | 0.981 | 0.986 | 0.982 |
| 2730 | 0.983 | 0.983 | 0.987 | 0.983 |

|      |       |       |       |       |
|------|-------|-------|-------|-------|
| 2740 | 0.980 | 0.979 | 0.985 | 0.979 |
| 2750 | 0.979 | 0.978 | 0.985 | 0.979 |
| 2760 | 0.983 | 0.983 | 0.986 | 0.983 |
| 2770 | 0.982 | 0.981 | 0.986 | 0.982 |
| 2780 | 0.983 | 0.983 | 0.987 | 0.983 |
| 2790 | 0.982 | 0.981 | 0.985 | 0.981 |
| 2800 | 0.980 | 0.980 | 0.984 | 0.980 |
| 2810 | 0.984 | 0.983 | 0.988 | 0.984 |
| 2820 | 0.977 | 0.976 | 0.982 | 0.977 |
| 2830 | 0.981 | 0.980 | 0.985 | 0.981 |
| 2840 | 0.980 | 0.980 | 0.984 | 0.980 |
| 2850 | 0.978 | 0.978 | 0.983 | 0.978 |
| 2860 | 0.982 | 0.981 | 0.984 | 0.981 |
| 2870 | 0.980 | 0.979 | 0.985 | 0.979 |
| 2880 | 0.982 | 0.981 | 0.986 | 0.982 |
| 2890 | 0.985 | 0.985 | 0.989 | 0.985 |
| 2900 | 0.981 | 0.980 | 0.985 | 0.981 |
| 2910 | 0.982 | 0.981 | 0.985 | 0.982 |
| 2920 | 0.982 | 0.982 | 0.986 | 0.982 |
| 2930 | 0.980 | 0.980 | 0.984 | 0.980 |
| 2940 | 0.979 | 0.978 | 0.985 | 0.979 |
| 2950 | 0.980 | 0.980 | 0.983 | 0.980 |
| 2960 | 0.981 | 0.980 | 0.985 | 0.981 |
| 2970 | 0.980 | 0.980 | 0.985 | 0.980 |
| 2980 | 0.983 | 0.983 | 0.988 | 0.983 |
| 2990 | 0.982 | 0.981 | 0.985 | 0.982 |
| 3000 | 0.980 | 0.979 | 0.983 | 0.980 |
| 3010 | 0.980 | 0.980 | 0.984 | 0.980 |
| 3020 | 0.976 | 0.976 | 0.981 | 0.976 |
| 3030 | 0.981 | 0.980 | 0.986 | 0.981 |
| 3040 | 0.978 | 0.978 | 0.982 | 0.978 |
| 3050 | 0.981 | 0.980 | 0.986 | 0.981 |
| 3060 | 0.981 | 0.980 | 0.986 | 0.981 |
| 3070 | 0.983 | 0.983 | 0.986 | 0.983 |
| 3080 | 0.980 | 0.980 | 0.983 | 0.980 |
| 3090 | 0.980 | 0.980 | 0.984 | 0.980 |
| 3100 | 0.982 | 0.982 | 0.986 | 0.982 |
| 3110 | 0.980 | 0.980 | 0.984 | 0.980 |
| 3120 | 0.978 | 0.978 | 0.982 | 0.978 |
| 3130 | 0.980 | 0.980 | 0.983 | 0.980 |
| 3140 | 0.983 | 0.983 | 0.986 | 0.983 |
| 3150 | 0.982 | 0.981 | 0.985 | 0.981 |
| 3160 | 0.980 | 0.980 | 0.985 | 0.980 |

|      |       |       |       |       |
|------|-------|-------|-------|-------|
| 3170 | 0.982 | 0.982 | 0.986 | 0.982 |
| 3180 | 0.980 | 0.980 | 0.984 | 0.980 |
| 3190 | 0.982 | 0.982 | 0.986 | 0.982 |
| 3200 | 0.981 | 0.980 | 0.985 | 0.981 |
| 3210 | 0.979 | 0.978 | 0.984 | 0.979 |
| 3220 | 0.982 | 0.981 | 0.986 | 0.982 |
| 3230 | 0.982 | 0.981 | 0.985 | 0.982 |
| 3240 | 0.982 | 0.981 | 0.986 | 0.982 |
| 3250 | 0.982 | 0.982 | 0.987 | 0.982 |
| 3260 | 0.982 | 0.981 | 0.986 | 0.982 |
| 3270 | 0.979 | 0.978 | 0.983 | 0.979 |
| 3280 | 0.982 | 0.981 | 0.986 | 0.982 |
| 3290 | 0.980 | 0.979 | 0.984 | 0.979 |
| 3300 | 0.984 | 0.983 | 0.988 | 0.984 |
| 3310 | 0.980 | 0.980 | 0.984 | 0.980 |
| 3320 | 0.982 | 0.981 | 0.986 | 0.982 |
| 3330 | 0.978 | 0.977 | 0.982 | 0.977 |
| 3340 | 0.980 | 0.979 | 0.984 | 0.980 |
| 3350 | 0.982 | 0.981 | 0.986 | 0.982 |
| 3360 | 0.978 | 0.978 | 0.984 | 0.978 |
| 3370 | 0.981 | 0.980 | 0.986 | 0.981 |
| 3380 | 0.980 | 0.979 | 0.983 | 0.980 |
| 3390 | 0.982 | 0.981 | 0.985 | 0.982 |
| 3400 | 0.979 | 0.978 | 0.983 | 0.979 |
| 3410 | 0.982 | 0.981 | 0.985 | 0.982 |
| 3420 | 0.982 | 0.981 | 0.986 | 0.982 |
| 3430 | 0.980 | 0.980 | 0.984 | 0.980 |
| 3440 | 0.980 | 0.979 | 0.985 | 0.979 |
| 3450 | 0.982 | 0.981 | 0.986 | 0.982 |
| 3460 | 0.984 | 0.983 | 0.988 | 0.984 |
| 3470 | 0.978 | 0.977 | 0.982 | 0.977 |
| 3480 | 0.980 | 0.980 | 0.985 | 0.980 |
| 3490 | 0.984 | 0.983 | 0.987 | 0.984 |
| 3500 | 0.981 | 0.980 | 0.985 | 0.981 |
| 3510 | 0.982 | 0.982 | 0.987 | 0.982 |
| 3520 | 0.985 | 0.985 | 0.989 | 0.985 |
| 3530 | 0.983 | 0.983 | 0.988 | 0.983 |
| 3540 | 0.979 | 0.978 | 0.983 | 0.979 |
| 3550 | 0.982 | 0.982 | 0.987 | 0.982 |
| 3560 | 0.981 | 0.980 | 0.985 | 0.981 |
| 3570 | 0.984 | 0.983 | 0.987 | 0.984 |
| 3580 | 0.984 | 0.983 | 0.987 | 0.984 |
| 3590 | 0.982 | 0.982 | 0.986 | 0.982 |

|      |       |       |       |       |
|------|-------|-------|-------|-------|
| 3600 | 0.980 | 0.980 | 0.985 | 0.980 |
| 3610 | 0.982 | 0.981 | 0.985 | 0.982 |
| 3620 | 0.980 | 0.979 | 0.983 | 0.980 |
| 3630 | 0.981 | 0.980 | 0.986 | 0.981 |
| 3640 | 0.980 | 0.980 | 0.984 | 0.980 |
| 3650 | 0.980 | 0.980 | 0.986 | 0.980 |
| 3660 | 0.982 | 0.982 | 0.986 | 0.982 |
| 3670 | 0.982 | 0.981 | 0.987 | 0.982 |
| 3680 | 0.981 | 0.980 | 0.986 | 0.981 |
| 3690 | 0.982 | 0.982 | 0.987 | 0.982 |
| 3700 | 0.979 | 0.978 | 0.983 | 0.979 |
| 3710 | 0.980 | 0.980 | 0.984 | 0.980 |
| 3720 | 0.982 | 0.981 | 0.986 | 0.982 |
| 3730 | 0.982 | 0.982 | 0.985 | 0.982 |
| 3740 | 0.981 | 0.980 | 0.986 | 0.981 |
| 3750 | 0.981 | 0.980 | 0.985 | 0.981 |
| 3760 | 0.983 | 0.983 | 0.987 | 0.983 |
| 3770 | 0.979 | 0.978 | 0.983 | 0.979 |
| 3780 | 0.978 | 0.978 | 0.985 | 0.978 |
| 3790 | 0.980 | 0.979 | 0.983 | 0.980 |
| 3800 | 0.980 | 0.979 | 0.985 | 0.980 |
| 3810 | 0.979 | 0.978 | 0.984 | 0.979 |
| 3820 | 0.982 | 0.982 | 0.986 | 0.982 |
| 3830 | 0.981 | 0.980 | 0.985 | 0.981 |
| 3840 | 0.982 | 0.981 | 0.987 | 0.982 |
| 3850 | 0.980 | 0.980 | 0.985 | 0.980 |
| 3860 | 0.982 | 0.982 | 0.987 | 0.982 |
| 3870 | 0.982 | 0.981 | 0.985 | 0.982 |
| 3880 | 0.984 | 0.983 | 0.989 | 0.984 |
| 3890 | 0.984 | 0.983 | 0.988 | 0.984 |
| 3900 | 0.983 | 0.983 | 0.986 | 0.983 |
| 3910 | 0.982 | 0.982 | 0.986 | 0.982 |
| 3920 | 0.984 | 0.983 | 0.988 | 0.984 |
| 3930 | 0.980 | 0.980 | 0.985 | 0.980 |
| 3940 | 0.982 | 0.982 | 0.986 | 0.982 |
| 3950 | 0.981 | 0.980 | 0.987 | 0.981 |
| 3960 | 0.982 | 0.982 | 0.986 | 0.982 |
| 3970 | 0.978 | 0.978 | 0.982 | 0.978 |
| 3980 | 0.982 | 0.981 | 0.987 | 0.982 |
| 3990 | 0.982 | 0.981 | 0.986 | 0.982 |
| 4000 | 0.983 | 0.983 | 0.988 | 0.983 |
| 4010 | 0.982 | 0.982 | 0.988 | 0.982 |
| 4020 | 0.978 | 0.977 | 0.983 | 0.977 |

|      |       |       |       |       |
|------|-------|-------|-------|-------|
| 4030 | 0.983 | 0.983 | 0.987 | 0.983 |
| 4040 | 0.979 | 0.978 | 0.984 | 0.979 |
| 4050 | 0.980 | 0.979 | 0.986 | 0.979 |
| 4060 | 0.983 | 0.983 | 0.987 | 0.983 |
| 4070 | 0.981 | 0.980 | 0.986 | 0.981 |
| 4080 | 0.981 | 0.980 | 0.985 | 0.981 |
| 4090 | 0.982 | 0.981 | 0.986 | 0.982 |
| 4100 | 0.982 | 0.982 | 0.986 | 0.982 |
| 4110 | 0.979 | 0.978 | 0.984 | 0.979 |
| 4120 | 0.978 | 0.977 | 0.982 | 0.977 |
| 4130 | 0.984 | 0.983 | 0.987 | 0.984 |
| 4140 | 0.979 | 0.978 | 0.983 | 0.979 |
| 4150 | 0.983 | 0.983 | 0.987 | 0.983 |
| 4160 | 0.982 | 0.982 | 0.987 | 0.982 |
| 4170 | 0.981 | 0.980 | 0.986 | 0.981 |
| 4180 | 0.981 | 0.980 | 0.985 | 0.981 |
| 4190 | 0.982 | 0.981 | 0.986 | 0.982 |
| 4200 | 0.981 | 0.980 | 0.986 | 0.981 |
| 4210 | 0.981 | 0.980 | 0.986 | 0.981 |
| 4220 | 0.980 | 0.980 | 0.986 | 0.980 |
| 4230 | 0.984 | 0.983 | 0.988 | 0.984 |
| 4240 | 0.980 | 0.979 | 0.985 | 0.980 |
| 4250 | 0.981 | 0.980 | 0.986 | 0.981 |
| 4260 | 0.981 | 0.980 | 0.986 | 0.981 |
| 4270 | 0.980 | 0.980 | 0.986 | 0.980 |
| 4280 | 0.981 | 0.980 | 0.986 | 0.981 |
| 4290 | 0.982 | 0.982 | 0.987 | 0.982 |
| 4300 | 0.982 | 0.982 | 0.985 | 0.982 |
| 4310 | 0.981 | 0.980 | 0.986 | 0.981 |
| 4320 | 0.982 | 0.982 | 0.987 | 0.982 |
| 4330 | 0.981 | 0.980 | 0.986 | 0.981 |
| 4340 | 0.984 | 0.983 | 0.987 | 0.984 |
| 4350 | 0.980 | 0.979 | 0.985 | 0.979 |
| 4360 | 0.978 | 0.977 | 0.982 | 0.978 |
| 4370 | 0.982 | 0.981 | 0.986 | 0.982 |
| 4380 | 0.982 | 0.981 | 0.985 | 0.982 |
| 4390 | 0.980 | 0.979 | 0.985 | 0.979 |
| 4400 | 0.984 | 0.983 | 0.988 | 0.984 |
| 4410 | 0.980 | 0.980 | 0.983 | 0.980 |
| 4420 | 0.982 | 0.982 | 0.985 | 0.982 |
| 4430 | 0.980 | 0.980 | 0.985 | 0.980 |
| 4440 | 0.979 | 0.978 | 0.982 | 0.979 |
| 4450 | 0.982 | 0.982 | 0.987 | 0.982 |

|      |       |       |       |       |
|------|-------|-------|-------|-------|
| 4460 | 0.980 | 0.979 | 0.983 | 0.979 |
| 4470 | 0.977 | 0.976 | 0.982 | 0.977 |
| 4480 | 0.982 | 0.982 | 0.987 | 0.982 |
| 4490 | 0.980 | 0.979 | 0.986 | 0.979 |
| 4500 | 0.978 | 0.977 | 0.983 | 0.977 |
| 4510 | 0.980 | 0.980 | 0.985 | 0.980 |
| 4520 | 0.983 | 0.983 | 0.987 | 0.983 |
| 4530 | 0.982 | 0.981 | 0.986 | 0.981 |
| 4540 | 0.980 | 0.980 | 0.986 | 0.980 |
| 4550 | 0.981 | 0.980 | 0.985 | 0.981 |
| 4560 | 0.980 | 0.979 | 0.986 | 0.979 |
| 4570 | 0.979 | 0.978 | 0.984 | 0.979 |
| 4580 | 0.981 | 0.980 | 0.985 | 0.981 |
| 4590 | 0.978 | 0.978 | 0.984 | 0.978 |
| 4600 | 0.980 | 0.980 | 0.985 | 0.980 |
| 4610 | 0.980 | 0.979 | 0.984 | 0.979 |
| 4620 | 0.980 | 0.980 | 0.984 | 0.980 |
| 4630 | 0.981 | 0.980 | 0.986 | 0.981 |
| 4640 | 0.984 | 0.983 | 0.988 | 0.984 |
| 4650 | 0.980 | 0.980 | 0.986 | 0.980 |
| 4660 | 0.980 | 0.980 | 0.985 | 0.980 |
| 4670 | 0.983 | 0.983 | 0.987 | 0.983 |
| 4680 | 0.984 | 0.984 | 0.989 | 0.984 |
| 4690 | 0.982 | 0.982 | 0.986 | 0.982 |
| 4700 | 0.981 | 0.980 | 0.986 | 0.981 |
| 4710 | 0.984 | 0.983 | 0.988 | 0.984 |
| 4720 | 0.984 | 0.983 | 0.987 | 0.984 |
| 4730 | 0.983 | 0.983 | 0.988 | 0.983 |
| 4740 | 0.983 | 0.983 | 0.987 | 0.983 |
| 4750 | 0.983 | 0.983 | 0.988 | 0.983 |
| 4760 | 0.980 | 0.979 | 0.984 | 0.980 |
| 4770 | 0.979 | 0.978 | 0.985 | 0.979 |
| 4780 | 0.978 | 0.978 | 0.984 | 0.978 |
| 4790 | 0.980 | 0.980 | 0.986 | 0.980 |
| 4800 | 0.983 | 0.983 | 0.988 | 0.983 |
| 4810 | 0.980 | 0.980 | 0.985 | 0.980 |
| 4820 | 0.979 | 0.978 | 0.984 | 0.979 |
| 4830 | 0.985 | 0.985 | 0.988 | 0.985 |
| 4840 | 0.982 | 0.981 | 0.986 | 0.982 |
| 4850 | 0.982 | 0.982 | 0.986 | 0.982 |
| 4860 | 0.984 | 0.984 | 0.989 | 0.984 |
| 4870 | 0.980 | 0.980 | 0.984 | 0.980 |
| 4880 | 0.984 | 0.983 | 0.988 | 0.984 |

|      |       |       |       |       |
|------|-------|-------|-------|-------|
| 4890 | 0.984 | 0.984 | 0.989 | 0.984 |
| 4900 | 0.986 | 0.985 | 0.990 | 0.986 |
| 4910 | 0.982 | 0.982 | 0.986 | 0.982 |
| 4920 | 0.984 | 0.984 | 0.988 | 0.984 |
| 4930 | 0.981 | 0.980 | 0.985 | 0.981 |
| 4940 | 0.982 | 0.982 | 0.987 | 0.982 |
| 4950 | 0.983 | 0.983 | 0.987 | 0.983 |
| 4960 | 0.984 | 0.984 | 0.988 | 0.984 |
| 4970 | 0.980 | 0.979 | 0.983 | 0.980 |
| 4980 | 0.981 | 0.980 | 0.985 | 0.981 |
| 4990 | 0.985 | 0.985 | 0.988 | 0.985 |
| 5000 | 0.984 | 0.984 | 0.988 | 0.984 |
| 5010 | 0.985 | 0.985 | 0.989 | 0.985 |
| 5020 | 0.982 | 0.981 | 0.986 | 0.982 |
| 5030 | 0.984 | 0.984 | 0.989 | 0.984 |
| 5040 | 0.981 | 0.980 | 0.984 | 0.981 |
| 5050 | 0.982 | 0.982 | 0.986 | 0.982 |
| 5060 | 0.983 | 0.983 | 0.988 | 0.983 |
| 5070 | 0.983 | 0.983 | 0.987 | 0.983 |
| 5080 | 0.982 | 0.981 | 0.985 | 0.982 |
| 5090 | 0.985 | 0.985 | 0.989 | 0.985 |
| 5100 | 0.982 | 0.981 | 0.985 | 0.982 |
| 5110 | 0.979 | 0.978 | 0.982 | 0.979 |
| 5120 | 0.979 | 0.978 | 0.986 | 0.979 |
| 5130 | 0.983 | 0.983 | 0.986 | 0.983 |
| 5140 | 0.979 | 0.978 | 0.985 | 0.979 |
| 5150 | 0.984 | 0.984 | 0.989 | 0.984 |
| 5160 | 0.985 | 0.985 | 0.989 | 0.985 |
| 5170 | 0.982 | 0.982 | 0.986 | 0.982 |
| 5180 | 0.982 | 0.982 | 0.987 | 0.982 |
| 5190 | 0.984 | 0.984 | 0.987 | 0.984 |
| 5200 | 0.982 | 0.981 | 0.986 | 0.982 |
| 5210 | 0.982 | 0.982 | 0.985 | 0.982 |
| 5220 | 0.985 | 0.985 | 0.988 | 0.985 |
| 5230 | 0.982 | 0.981 | 0.985 | 0.981 |
| 5240 | 0.985 | 0.985 | 0.989 | 0.985 |
| 5250 | 0.984 | 0.983 | 0.988 | 0.984 |
| 5260 | 0.984 | 0.983 | 0.988 | 0.984 |
| 5270 | 0.984 | 0.983 | 0.988 | 0.983 |
| 5280 | 0.984 | 0.984 | 0.988 | 0.984 |
| 5290 | 0.980 | 0.980 | 0.986 | 0.980 |
| 5300 | 0.980 | 0.979 | 0.983 | 0.979 |
| 5310 | 0.981 | 0.980 | 0.984 | 0.981 |



|      |       |       |       |       |
|------|-------|-------|-------|-------|
| 5320 | 0.984 | 0.984 | 0.989 | 0.984 |
| 5330 | 0.984 | 0.983 | 0.987 | 0.984 |
| 5340 | 0.983 | 0.983 | 0.987 | 0.983 |
| 5350 | 0.981 | 0.980 | 0.985 | 0.981 |
| 5360 | 0.987 | 0.987 | 0.991 | 0.987 |
| 5370 | 0.983 | 0.983 | 0.987 | 0.983 |
| 5380 | 0.984 | 0.983 | 0.988 | 0.984 |
| 5390 | 0.984 | 0.983 | 0.989 | 0.984 |
| 5400 | 0.982 | 0.981 | 0.985 | 0.982 |
| 5410 | 0.980 | 0.979 | 0.985 | 0.979 |
| 5420 | 0.982 | 0.982 | 0.986 | 0.982 |
| 5430 | 0.981 | 0.980 | 0.984 | 0.981 |
| 5440 | 0.982 | 0.981 | 0.987 | 0.981 |
| 5450 | 0.984 | 0.983 | 0.989 | 0.983 |
| 5460 | 0.982 | 0.981 | 0.986 | 0.982 |
| 5470 | 0.984 | 0.984 | 0.988 | 0.984 |
| 5480 | 0.983 | 0.983 | 0.988 | 0.983 |
| 5490 | 0.981 | 0.980 | 0.985 | 0.981 |
| 5500 | 0.984 | 0.984 | 0.989 | 0.984 |
| 5510 | 0.979 | 0.978 | 0.983 | 0.979 |
| 5520 | 0.983 | 0.983 | 0.988 | 0.983 |
| 5530 | 0.984 | 0.984 | 0.987 | 0.984 |
| 5540 | 0.984 | 0.984 | 0.988 | 0.984 |
| 5550 | 0.982 | 0.981 | 0.985 | 0.982 |
| 5560 | 0.984 | 0.984 | 0.989 | 0.984 |
| 5570 | 0.983 | 0.983 | 0.986 | 0.983 |
| 5580 | 0.985 | 0.985 | 0.989 | 0.985 |
| 5590 | 0.983 | 0.983 | 0.985 | 0.983 |
| 5600 | 0.980 | 0.979 | 0.984 | 0.979 |
| 5610 | 0.984 | 0.983 | 0.987 | 0.984 |
| 5620 | 0.983 | 0.983 | 0.986 | 0.983 |
| 5630 | 0.984 | 0.983 | 0.988 | 0.984 |
| 5640 | 0.984 | 0.984 | 0.987 | 0.984 |
| 5650 | 0.982 | 0.982 | 0.986 | 0.982 |
| 5660 | 0.980 | 0.980 | 0.985 | 0.980 |
| 5670 | 0.982 | 0.982 | 0.987 | 0.982 |
| 5680 | 0.984 | 0.984 | 0.988 | 0.984 |
| 5690 | 0.981 | 0.980 | 0.986 | 0.981 |
| 5700 | 0.983 | 0.983 | 0.986 | 0.983 |
| 5710 | 0.984 | 0.983 | 0.988 | 0.984 |
| 5720 | 0.984 | 0.984 | 0.989 | 0.984 |
| 5730 | 0.982 | 0.982 | 0.986 | 0.982 |
| 5740 | 0.985 | 0.985 | 0.989 | 0.985 |

|      |       |       |       |       |
|------|-------|-------|-------|-------|
| 5750 | 0.983 | 0.983 | 0.985 | 0.983 |
| 5760 | 0.980 | 0.980 | 0.986 | 0.980 |
| 5770 | 0.982 | 0.981 | 0.987 | 0.982 |
| 5780 | 0.982 | 0.982 | 0.986 | 0.982 |
| 5790 | 0.982 | 0.982 | 0.988 | 0.982 |
| 5800 | 0.980 | 0.980 | 0.985 | 0.980 |
| 5810 | 0.982 | 0.981 | 0.985 | 0.981 |
| 5820 | 0.984 | 0.983 | 0.987 | 0.984 |
| 5830 | 0.984 | 0.983 | 0.986 | 0.984 |
| 5840 | 0.982 | 0.981 | 0.985 | 0.982 |
| 5850 | 0.985 | 0.985 | 0.988 | 0.985 |
| 5860 | 0.983 | 0.983 | 0.986 | 0.983 |
| 5870 | 0.982 | 0.981 | 0.986 | 0.982 |
| 5880 | 0.982 | 0.981 | 0.987 | 0.981 |
| 5890 | 0.981 | 0.980 | 0.986 | 0.981 |
| 5900 | 0.984 | 0.984 | 0.988 | 0.984 |
| 5910 | 0.981 | 0.980 | 0.986 | 0.981 |
| 5920 | 0.983 | 0.983 | 0.987 | 0.983 |
| 5930 | 0.984 | 0.984 | 0.987 | 0.984 |
| 5940 | 0.982 | 0.982 | 0.986 | 0.982 |
| 5950 | 0.984 | 0.984 | 0.988 | 0.984 |
| 5960 | 0.984 | 0.983 | 0.986 | 0.984 |
| 5970 | 0.984 | 0.984 | 0.990 | 0.984 |
| 5980 | 0.983 | 0.983 | 0.988 | 0.983 |
| 5990 | 0.983 | 0.983 | 0.986 | 0.983 |
| 6000 | 0.982 | 0.982 | 0.986 | 0.982 |
| 6010 | 0.984 | 0.983 | 0.988 | 0.984 |
| 6020 | 0.982 | 0.982 | 0.986 | 0.982 |
| 6030 | 0.981 | 0.980 | 0.987 | 0.981 |
| 6040 | 0.984 | 0.983 | 0.987 | 0.984 |
| 6050 | 0.984 | 0.983 | 0.987 | 0.984 |
| 6060 | 0.982 | 0.982 | 0.986 | 0.982 |
| 6070 | 0.982 | 0.982 | 0.987 | 0.982 |
| 6080 | 0.984 | 0.984 | 0.987 | 0.984 |
| 6090 | 0.983 | 0.983 | 0.986 | 0.983 |
| 6100 | 0.982 | 0.981 | 0.985 | 0.982 |
| 6110 | 0.982 | 0.982 | 0.986 | 0.982 |
| 6120 | 0.982 | 0.982 | 0.986 | 0.982 |
| 6130 | 0.983 | 0.983 | 0.986 | 0.983 |
| 6140 | 0.984 | 0.983 | 0.988 | 0.983 |
| 6150 | 0.982 | 0.982 | 0.987 | 0.982 |
| 6160 | 0.982 | 0.982 | 0.987 | 0.982 |
| 6170 | 0.981 | 0.980 | 0.986 | 0.981 |

|      |       |       |       |       |
|------|-------|-------|-------|-------|
| 6180 | 0.982 | 0.982 | 0.987 | 0.982 |
| 6190 | 0.983 | 0.983 | 0.986 | 0.983 |
| 6200 | 0.982 | 0.982 | 0.986 | 0.982 |
| 6210 | 0.982 | 0.981 | 0.984 | 0.982 |
| 6220 | 0.980 | 0.980 | 0.985 | 0.980 |
| 6230 | 0.981 | 0.980 | 0.986 | 0.981 |
| 6240 | 0.984 | 0.984 | 0.987 | 0.984 |
| 6250 | 0.984 | 0.983 | 0.987 | 0.983 |
| 6260 | 0.984 | 0.983 | 0.987 | 0.984 |
| 6270 | 0.980 | 0.979 | 0.985 | 0.979 |
| 6280 | 0.981 | 0.980 | 0.986 | 0.981 |
| 6290 | 0.983 | 0.983 | 0.987 | 0.983 |
| 6300 | 0.982 | 0.981 | 0.986 | 0.982 |
| 6310 | 0.980 | 0.980 | 0.985 | 0.980 |
| 6320 | 0.986 | 0.985 | 0.990 | 0.986 |
| 6330 | 0.984 | 0.983 | 0.989 | 0.983 |
| 6340 | 0.983 | 0.983 | 0.987 | 0.983 |
| 6350 | 0.985 | 0.985 | 0.989 | 0.985 |
| 6360 | 0.984 | 0.983 | 0.988 | 0.984 |
| 6370 | 0.982 | 0.982 | 0.988 | 0.982 |
| 6380 | 0.983 | 0.983 | 0.988 | 0.983 |
| 6390 | 0.982 | 0.982 | 0.987 | 0.982 |
| 6400 | 0.985 | 0.985 | 0.990 | 0.985 |
| 6410 | 0.986 | 0.985 | 0.989 | 0.986 |
| 6420 | 0.982 | 0.981 | 0.986 | 0.982 |
| 6430 | 0.983 | 0.983 | 0.986 | 0.983 |
| 6440 | 0.979 | 0.978 | 0.983 | 0.979 |
| 6450 | 0.981 | 0.980 | 0.987 | 0.981 |
| 6460 | 0.982 | 0.982 | 0.986 | 0.982 |
| 6470 | 0.982 | 0.981 | 0.985 | 0.981 |
| 6480 | 0.982 | 0.982 | 0.986 | 0.982 |
| 6490 | 0.980 | 0.980 | 0.985 | 0.980 |
| 6500 | 0.980 | 0.980 | 0.984 | 0.980 |
| 6510 | 0.984 | 0.983 | 0.987 | 0.984 |
| 6520 | 0.982 | 0.981 | 0.986 | 0.982 |
| 6530 | 0.981 | 0.980 | 0.985 | 0.981 |
| 6540 | 0.984 | 0.983 | 0.988 | 0.984 |
| 6550 | 0.981 | 0.980 | 0.987 | 0.981 |
| 6560 | 0.981 | 0.980 | 0.986 | 0.981 |
| 6570 | 0.982 | 0.982 | 0.987 | 0.982 |
| 6580 | 0.981 | 0.980 | 0.985 | 0.981 |
| 6590 | 0.982 | 0.982 | 0.987 | 0.982 |
| 6600 | 0.983 | 0.983 | 0.987 | 0.983 |

|      |       |       |       |       |
|------|-------|-------|-------|-------|
| 6610 | 0.983 | 0.983 | 0.987 | 0.983 |
| 6620 | 0.982 | 0.982 | 0.987 | 0.982 |
| 6630 | 0.982 | 0.981 | 0.986 | 0.981 |
| 6640 | 0.984 | 0.983 | 0.987 | 0.984 |
| 6650 | 0.980 | 0.980 | 0.985 | 0.980 |
| 6660 | 0.982 | 0.981 | 0.986 | 0.982 |
| 6670 | 0.981 | 0.980 | 0.986 | 0.981 |
| 6680 | 0.982 | 0.981 | 0.985 | 0.982 |
| 6690 | 0.982 | 0.982 | 0.987 | 0.982 |
| 6700 | 0.985 | 0.985 | 0.989 | 0.985 |
| 6710 | 0.986 | 0.985 | 0.989 | 0.986 |
| 6720 | 0.979 | 0.978 | 0.984 | 0.979 |
| 6730 | 0.982 | 0.982 | 0.987 | 0.982 |
| 6740 | 0.982 | 0.981 | 0.986 | 0.982 |
| 6750 | 0.981 | 0.980 | 0.985 | 0.981 |
| 6760 | 0.984 | 0.983 | 0.987 | 0.984 |
| 6770 | 0.982 | 0.982 | 0.987 | 0.982 |
| 6780 | 0.984 | 0.984 | 0.987 | 0.984 |
| 6790 | 0.982 | 0.982 | 0.986 | 0.982 |
| 6800 | 0.980 | 0.980 | 0.985 | 0.980 |
| 6810 | 0.985 | 0.985 | 0.989 | 0.985 |
| 6820 | 0.985 | 0.985 | 0.988 | 0.985 |
| 6830 | 0.984 | 0.984 | 0.988 | 0.984 |
| 6840 | 0.986 | 0.985 | 0.989 | 0.986 |
| 6850 | 0.979 | 0.978 | 0.984 | 0.979 |
| 6860 | 0.983 | 0.983 | 0.987 | 0.983 |
| 6870 | 0.982 | 0.981 | 0.987 | 0.981 |
| 6880 | 0.982 | 0.982 | 0.987 | 0.982 |
| 6890 | 0.981 | 0.980 | 0.985 | 0.981 |
| 6900 | 0.981 | 0.980 | 0.986 | 0.981 |
| 6910 | 0.983 | 0.983 | 0.987 | 0.983 |
| 6920 | 0.986 | 0.985 | 0.988 | 0.986 |
| 6930 | 0.979 | 0.978 | 0.983 | 0.979 |
| 6940 | 0.984 | 0.983 | 0.987 | 0.984 |
| 6950 | 0.984 | 0.983 | 0.987 | 0.984 |
| 6960 | 0.984 | 0.983 | 0.987 | 0.984 |
| 6970 | 0.980 | 0.980 | 0.986 | 0.980 |
| 6980 | 0.982 | 0.982 | 0.987 | 0.982 |
| 6990 | 0.980 | 0.980 | 0.984 | 0.980 |
| 7000 | 0.984 | 0.983 | 0.989 | 0.984 |
| 7010 | 0.983 | 0.983 | 0.987 | 0.983 |
| 7020 | 0.987 | 0.987 | 0.991 | 0.987 |
| 7030 | 0.978 | 0.978 | 0.983 | 0.978 |

|      |       |       |       |       |
|------|-------|-------|-------|-------|
| 7040 | 0.982 | 0.981 | 0.986 | 0.981 |
| 7050 | 0.983 | 0.983 | 0.986 | 0.983 |
| 7060 | 0.984 | 0.983 | 0.987 | 0.984 |
| 7070 | 0.985 | 0.985 | 0.989 | 0.985 |
| 7080 | 0.982 | 0.982 | 0.986 | 0.982 |
| 7090 | 0.984 | 0.984 | 0.988 | 0.984 |
| 7100 | 0.979 | 0.978 | 0.984 | 0.979 |
| 7110 | 0.984 | 0.983 | 0.989 | 0.984 |
| 7120 | 0.985 | 0.985 | 0.987 | 0.985 |
| 7130 | 0.982 | 0.981 | 0.986 | 0.981 |
| 7140 | 0.983 | 0.983 | 0.986 | 0.983 |
| 7150 | 0.983 | 0.983 | 0.986 | 0.983 |
| 7160 | 0.984 | 0.984 | 0.988 | 0.984 |
| 7170 | 0.983 | 0.983 | 0.986 | 0.983 |
| 7180 | 0.983 | 0.983 | 0.988 | 0.983 |
| 7190 | 0.983 | 0.983 | 0.986 | 0.983 |
| 7200 | 0.980 | 0.979 | 0.985 | 0.979 |
| 7210 | 0.981 | 0.980 | 0.986 | 0.981 |
| 7220 | 0.984 | 0.983 | 0.987 | 0.984 |
| 7230 | 0.982 | 0.982 | 0.988 | 0.982 |
| 7240 | 0.986 | 0.985 | 0.989 | 0.986 |
| 7250 | 0.982 | 0.982 | 0.986 | 0.982 |
| 7260 | 0.981 | 0.980 | 0.986 | 0.981 |
| 7270 | 0.981 | 0.980 | 0.986 | 0.981 |
| 7280 | 0.982 | 0.981 | 0.987 | 0.982 |
| 7290 | 0.982 | 0.982 | 0.986 | 0.982 |
| 7300 | 0.984 | 0.983 | 0.989 | 0.984 |
| 7310 | 0.982 | 0.982 | 0.987 | 0.982 |
| 7320 | 0.980 | 0.980 | 0.985 | 0.980 |
| 7330 | 0.984 | 0.983 | 0.988 | 0.983 |
| 7340 | 0.984 | 0.984 | 0.986 | 0.984 |
| 7350 | 0.981 | 0.980 | 0.986 | 0.981 |
| 7360 | 0.982 | 0.981 | 0.986 | 0.981 |
| 7370 | 0.982 | 0.982 | 0.988 | 0.982 |
| 7380 | 0.982 | 0.982 | 0.986 | 0.982 |
| 7390 | 0.981 | 0.980 | 0.985 | 0.981 |
| 7400 | 0.981 | 0.980 | 0.985 | 0.981 |
| 7410 | 0.986 | 0.986 | 0.990 | 0.986 |
| 7420 | 0.984 | 0.983 | 0.988 | 0.983 |
| 7430 | 0.982 | 0.981 | 0.987 | 0.982 |
| 7440 | 0.982 | 0.982 | 0.986 | 0.982 |
| 7450 | 0.984 | 0.984 | 0.989 | 0.984 |
| 7460 | 0.980 | 0.980 | 0.986 | 0.980 |

|      |       |       |       |       |
|------|-------|-------|-------|-------|
| 7470 | 0.983 | 0.983 | 0.987 | 0.983 |
| 7480 | 0.984 | 0.983 | 0.988 | 0.984 |
| 7490 | 0.986 | 0.985 | 0.989 | 0.986 |
| 7500 | 0.984 | 0.983 | 0.988 | 0.984 |
| 7510 | 0.984 | 0.983 | 0.989 | 0.984 |
| 7520 | 0.981 | 0.980 | 0.986 | 0.981 |
| 7530 | 0.984 | 0.983 | 0.987 | 0.984 |
| 7540 | 0.984 | 0.983 | 0.989 | 0.984 |
| 7550 | 0.984 | 0.983 | 0.988 | 0.984 |
| 7560 | 0.984 | 0.983 | 0.988 | 0.984 |
| 7570 | 0.979 | 0.978 | 0.985 | 0.979 |
| 7580 | 0.982 | 0.982 | 0.988 | 0.982 |
| 7590 | 0.984 | 0.984 | 0.989 | 0.984 |
| 7600 | 0.986 | 0.986 | 0.989 | 0.986 |
| 7610 | 0.982 | 0.981 | 0.986 | 0.982 |
| 7620 | 0.982 | 0.982 | 0.987 | 0.982 |
| 7630 | 0.982 | 0.982 | 0.986 | 0.982 |
| 7640 | 0.985 | 0.985 | 0.990 | 0.985 |
| 7650 | 0.981 | 0.980 | 0.985 | 0.981 |
| 7660 | 0.981 | 0.980 | 0.986 | 0.981 |
| 7670 | 0.985 | 0.985 | 0.988 | 0.985 |
| 7680 | 0.984 | 0.984 | 0.988 | 0.984 |
| 7690 | 0.978 | 0.978 | 0.984 | 0.978 |
| 7700 | 0.982 | 0.981 | 0.986 | 0.982 |
| 7710 | 0.984 | 0.984 | 0.988 | 0.984 |
| 7720 | 0.983 | 0.983 | 0.988 | 0.983 |
| 7730 | 0.984 | 0.984 | 0.988 | 0.984 |
| 7740 | 0.982 | 0.981 | 0.986 | 0.982 |
| 7750 | 0.985 | 0.985 | 0.989 | 0.985 |
| 7760 | 0.981 | 0.980 | 0.987 | 0.981 |
| 7770 | 0.986 | 0.985 | 0.989 | 0.986 |
| 7780 | 0.984 | 0.983 | 0.988 | 0.984 |
| 7790 | 0.984 | 0.983 | 0.989 | 0.983 |
| 7800 | 0.983 | 0.983 | 0.988 | 0.983 |
| 7810 | 0.985 | 0.985 | 0.989 | 0.985 |
| 7820 | 0.987 | 0.987 | 0.991 | 0.987 |
| 7830 | 0.982 | 0.981 | 0.987 | 0.981 |
| 7840 | 0.980 | 0.980 | 0.984 | 0.980 |
| 7850 | 0.986 | 0.985 | 0.990 | 0.986 |
| 7860 | 0.982 | 0.981 | 0.986 | 0.981 |
| 7870 | 0.982 | 0.982 | 0.987 | 0.982 |
| 7880 | 0.982 | 0.981 | 0.986 | 0.982 |
| 7890 | 0.984 | 0.983 | 0.988 | 0.984 |

|      |       |       |       |       |
|------|-------|-------|-------|-------|
| 7900 | 0.984 | 0.983 | 0.988 | 0.984 |
| 7910 | 0.981 | 0.980 | 0.985 | 0.981 |
| 7920 | 0.980 | 0.980 | 0.985 | 0.980 |
| 7930 | 0.982 | 0.982 | 0.987 | 0.982 |
| 7940 | 0.982 | 0.982 | 0.986 | 0.982 |
| 7950 | 0.984 | 0.983 | 0.988 | 0.984 |
| 7960 | 0.981 | 0.980 | 0.985 | 0.981 |
| 7970 | 0.984 | 0.983 | 0.988 | 0.984 |
| 7980 | 0.978 | 0.978 | 0.985 | 0.978 |
| 7990 | 0.982 | 0.981 | 0.986 | 0.982 |
| 8000 | 0.984 | 0.983 | 0.987 | 0.984 |
| 8010 | 0.982 | 0.981 | 0.986 | 0.982 |
| 8020 | 0.983 | 0.983 | 0.987 | 0.983 |
| 8030 | 0.984 | 0.984 | 0.990 | 0.984 |
| 8040 | 0.981 | 0.980 | 0.986 | 0.981 |
| 8050 | 0.981 | 0.980 | 0.986 | 0.981 |
| 8060 | 0.983 | 0.983 | 0.988 | 0.983 |
| 8070 | 0.982 | 0.982 | 0.987 | 0.982 |
| 8080 | 0.982 | 0.981 | 0.987 | 0.981 |
| 8090 | 0.982 | 0.982 | 0.987 | 0.982 |
| 8100 | 0.984 | 0.984 | 0.988 | 0.984 |
| 8110 | 0.980 | 0.980 | 0.986 | 0.980 |
| 8120 | 0.982 | 0.982 | 0.986 | 0.982 |
| 8130 | 0.982 | 0.981 | 0.986 | 0.982 |
| 8140 | 0.983 | 0.983 | 0.986 | 0.983 |
| 8150 | 0.984 | 0.984 | 0.987 | 0.984 |
| 8160 | 0.980 | 0.979 | 0.985 | 0.979 |
| 8170 | 0.984 | 0.983 | 0.988 | 0.984 |
| 8180 | 0.985 | 0.985 | 0.989 | 0.985 |
| 8190 | 0.981 | 0.980 | 0.986 | 0.981 |
| 8200 | 0.982 | 0.982 | 0.986 | 0.982 |
| 8210 | 0.981 | 0.980 | 0.985 | 0.981 |
| 8220 | 0.982 | 0.981 | 0.986 | 0.981 |
| 8230 | 0.984 | 0.984 | 0.988 | 0.984 |
| 8240 | 0.982 | 0.982 | 0.986 | 0.982 |
| 8250 | 0.985 | 0.985 | 0.988 | 0.985 |
| 8260 | 0.982 | 0.982 | 0.987 | 0.982 |
| 8270 | 0.981 | 0.980 | 0.984 | 0.981 |
| 8280 | 0.980 | 0.980 | 0.986 | 0.980 |
| 8290 | 0.982 | 0.981 | 0.987 | 0.981 |
| 8300 | 0.982 | 0.982 | 0.986 | 0.982 |
| 8310 | 0.985 | 0.985 | 0.989 | 0.985 |
| 8320 | 0.981 | 0.980 | 0.986 | 0.981 |

|      |       |       |       |       |
|------|-------|-------|-------|-------|
| 8330 | 0.983 | 0.983 | 0.986 | 0.983 |
| 8340 | 0.984 | 0.983 | 0.987 | 0.984 |
| 8350 | 0.984 | 0.984 | 0.989 | 0.984 |
| 8360 | 0.980 | 0.980 | 0.984 | 0.980 |
| 8370 | 0.982 | 0.982 | 0.987 | 0.982 |
| 8380 | 0.982 | 0.982 | 0.986 | 0.982 |
| 8390 | 0.980 | 0.979 | 0.986 | 0.980 |
| 8400 | 0.984 | 0.984 | 0.989 | 0.984 |
| 8410 | 0.984 | 0.983 | 0.988 | 0.984 |
| 8420 | 0.986 | 0.985 | 0.991 | 0.986 |
| 8430 | 0.982 | 0.981 | 0.987 | 0.982 |
| 8440 | 0.982 | 0.982 | 0.987 | 0.982 |
| 8450 | 0.985 | 0.985 | 0.988 | 0.985 |
| 8460 | 0.984 | 0.984 | 0.989 | 0.984 |
| 8470 | 0.982 | 0.981 | 0.986 | 0.982 |
| 8480 | 0.984 | 0.984 | 0.989 | 0.984 |
| 8490 | 0.983 | 0.983 | 0.985 | 0.983 |
| 8500 | 0.985 | 0.985 | 0.989 | 0.985 |
| 8510 | 0.985 | 0.985 | 0.990 | 0.985 |
| 8520 | 0.983 | 0.983 | 0.987 | 0.983 |
| 8530 | 0.982 | 0.982 | 0.986 | 0.982 |
| 8540 | 0.984 | 0.984 | 0.987 | 0.984 |
| 8550 | 0.983 | 0.983 | 0.986 | 0.983 |
| 8560 | 0.985 | 0.985 | 0.989 | 0.985 |
| 8570 | 0.982 | 0.982 | 0.987 | 0.982 |
| 8580 | 0.984 | 0.984 | 0.989 | 0.984 |
| 8590 | 0.986 | 0.985 | 0.990 | 0.986 |
| 8600 | 0.983 | 0.983 | 0.988 | 0.983 |
| 8610 | 0.983 | 0.983 | 0.987 | 0.983 |
| 8620 | 0.986 | 0.986 | 0.990 | 0.986 |
| 8630 | 0.984 | 0.983 | 0.987 | 0.984 |
| 8640 | 0.981 | 0.980 | 0.986 | 0.981 |
| 8650 | 0.984 | 0.983 | 0.988 | 0.984 |
| 8660 | 0.986 | 0.985 | 0.990 | 0.986 |
| 8670 | 0.984 | 0.983 | 0.988 | 0.984 |
| 8680 | 0.983 | 0.983 | 0.987 | 0.983 |
| 8690 | 0.984 | 0.983 | 0.988 | 0.984 |
| 8700 | 0.984 | 0.983 | 0.987 | 0.984 |
| 8710 | 0.984 | 0.984 | 0.987 | 0.984 |
| 8720 | 0.983 | 0.983 | 0.988 | 0.983 |
| 8730 | 0.983 | 0.983 | 0.988 | 0.983 |
| 8740 | 0.981 | 0.980 | 0.986 | 0.981 |
| 8750 | 0.985 | 0.985 | 0.988 | 0.985 |



|      |       |       |       |       |
|------|-------|-------|-------|-------|
| 8760 | 0.983 | 0.983 | 0.987 | 0.983 |
| 8770 | 0.982 | 0.981 | 0.986 | 0.981 |
| 8780 | 0.983 | 0.983 | 0.987 | 0.983 |
| 8790 | 0.984 | 0.983 | 0.988 | 0.984 |
| 8800 | 0.983 | 0.983 | 0.987 | 0.983 |
| 8810 | 0.983 | 0.983 | 0.987 | 0.983 |
| 8820 | 0.986 | 0.985 | 0.989 | 0.986 |
| 8830 | 0.982 | 0.981 | 0.986 | 0.982 |
| 8840 | 0.984 | 0.983 | 0.987 | 0.984 |
| 8850 | 0.984 | 0.983 | 0.988 | 0.984 |
| 8860 | 0.984 | 0.983 | 0.988 | 0.984 |
| 8870 | 0.982 | 0.982 | 0.987 | 0.982 |
| 8880 | 0.983 | 0.983 | 0.988 | 0.983 |
| 8890 | 0.983 | 0.983 | 0.986 | 0.983 |
| 8900 | 0.984 | 0.984 | 0.989 | 0.984 |
| 8910 | 0.986 | 0.986 | 0.990 | 0.986 |
| 8920 | 0.983 | 0.983 | 0.986 | 0.983 |
| 8930 | 0.984 | 0.984 | 0.988 | 0.984 |
| 8940 | 0.981 | 0.980 | 0.985 | 0.981 |
| 8950 | 0.984 | 0.983 | 0.987 | 0.984 |

(6) IFS results with DT on the MCFS feature list

| Number of features | ACC   | MCC   | Macro F1 | Weighted F1 |
|--------------------|-------|-------|----------|-------------|
| 10                 | 0.724 | 0.717 | 0.735    | 0.722       |
| 20                 | 0.800 | 0.794 | 0.789    | 0.801       |
| 30                 | 0.822 | 0.817 | 0.817    | 0.823       |
| 40                 | 0.831 | 0.826 | 0.830    | 0.831       |
| 50                 | 0.814 | 0.809 | 0.815    | 0.815       |
| 60                 | 0.834 | 0.830 | 0.839    | 0.834       |
| 70                 | 0.821 | 0.816 | 0.825    | 0.819       |
| 80                 | 0.836 | 0.831 | 0.837    | 0.836       |
| 90                 | 0.827 | 0.822 | 0.833    | 0.825       |
| 100                | 0.837 | 0.833 | 0.826    | 0.841       |
| 110                | 0.825 | 0.820 | 0.828    | 0.826       |
| 120                | 0.836 | 0.832 | 0.838    | 0.837       |
| 130                | 0.832 | 0.827 | 0.827    | 0.831       |
| 140                | 0.824 | 0.820 | 0.829    | 0.825       |
| 150                | 0.826 | 0.822 | 0.822    | 0.827       |
| 160                | 0.823 | 0.818 | 0.823    | 0.824       |
| 170                | 0.832 | 0.828 | 0.837    | 0.833       |
| 180                | 0.839 | 0.835 | 0.840    | 0.840       |
| 190                | 0.832 | 0.827 | 0.836    | 0.832       |
| 200                | 0.842 | 0.838 | 0.847    | 0.842       |

|     |       |       |       |       |
|-----|-------|-------|-------|-------|
| 210 | 0.847 | 0.842 | 0.845 | 0.847 |
| 220 | 0.840 | 0.835 | 0.836 | 0.841 |
| 230 | 0.823 | 0.818 | 0.817 | 0.824 |
| 240 | 0.839 | 0.835 | 0.842 | 0.842 |
| 250 | 0.844 | 0.840 | 0.843 | 0.843 |
| 260 | 0.841 | 0.837 | 0.839 | 0.841 |
| 270 | 0.847 | 0.842 | 0.847 | 0.846 |
| 280 | 0.831 | 0.826 | 0.834 | 0.831 |
| 290 | 0.831 | 0.826 | 0.838 | 0.831 |
| 300 | 0.832 | 0.827 | 0.829 | 0.832 |
| 310 | 0.851 | 0.847 | 0.847 | 0.852 |
| 320 | 0.851 | 0.847 | 0.856 | 0.852 |
| 330 | 0.834 | 0.829 | 0.828 | 0.835 |
| 340 | 0.849 | 0.844 | 0.850 | 0.849 |
| 350 | 0.836 | 0.832 | 0.838 | 0.837 |
| 360 | 0.826 | 0.821 | 0.830 | 0.827 |
| 370 | 0.835 | 0.830 | 0.835 | 0.834 |
| 380 | 0.823 | 0.818 | 0.827 | 0.825 |
| 390 | 0.838 | 0.833 | 0.834 | 0.838 |
| 400 | 0.832 | 0.827 | 0.839 | 0.833 |
| 410 | 0.834 | 0.829 | 0.831 | 0.834 |
| 420 | 0.823 | 0.819 | 0.826 | 0.825 |
| 430 | 0.828 | 0.823 | 0.829 | 0.828 |
| 440 | 0.834 | 0.829 | 0.831 | 0.833 |
| 450 | 0.847 | 0.843 | 0.850 | 0.848 |
| 460 | 0.826 | 0.822 | 0.831 | 0.827 |
| 470 | 0.819 | 0.814 | 0.821 | 0.820 |
| 480 | 0.838 | 0.834 | 0.838 | 0.839 |
| 490 | 0.851 | 0.847 | 0.855 | 0.851 |
| 500 | 0.819 | 0.814 | 0.819 | 0.819 |
| 510 | 0.839 | 0.835 | 0.838 | 0.839 |
| 520 | 0.835 | 0.831 | 0.826 | 0.835 |
| 530 | 0.842 | 0.838 | 0.832 | 0.844 |
| 540 | 0.832 | 0.828 | 0.831 | 0.833 |
| 550 | 0.841 | 0.837 | 0.837 | 0.841 |
| 560 | 0.838 | 0.833 | 0.833 | 0.838 |
| 570 | 0.823 | 0.819 | 0.822 | 0.824 |
| 580 | 0.840 | 0.836 | 0.841 | 0.841 |
| 590 | 0.831 | 0.826 | 0.830 | 0.831 |
| 600 | 0.830 | 0.825 | 0.833 | 0.830 |
| 610 | 0.841 | 0.837 | 0.833 | 0.841 |
| 620 | 0.843 | 0.839 | 0.841 | 0.843 |
| 630 | 0.838 | 0.834 | 0.833 | 0.839 |

|      |       |       |       |       |
|------|-------|-------|-------|-------|
| 640  | 0.830 | 0.826 | 0.828 | 0.831 |
| 650  | 0.843 | 0.839 | 0.847 | 0.843 |
| 660  | 0.861 | 0.857 | 0.854 | 0.861 |
| 670  | 0.825 | 0.820 | 0.825 | 0.825 |
| 680  | 0.835 | 0.831 | 0.843 | 0.835 |
| 690  | 0.840 | 0.836 | 0.838 | 0.842 |
| 700  | 0.823 | 0.819 | 0.837 | 0.823 |
| 710  | 0.827 | 0.822 | 0.814 | 0.827 |
| 720  | 0.829 | 0.824 | 0.828 | 0.827 |
| 730  | 0.848 | 0.844 | 0.847 | 0.849 |
| 740  | 0.836 | 0.831 | 0.841 | 0.836 |
| 750  | 0.845 | 0.840 | 0.838 | 0.845 |
| 760  | 0.846 | 0.842 | 0.842 | 0.847 |
| 770  | 0.838 | 0.834 | 0.839 | 0.839 |
| 780  | 0.840 | 0.835 | 0.835 | 0.838 |
| 790  | 0.831 | 0.826 | 0.823 | 0.831 |
| 800  | 0.841 | 0.837 | 0.845 | 0.841 |
| 810  | 0.841 | 0.837 | 0.845 | 0.841 |
| 820  | 0.849 | 0.844 | 0.849 | 0.848 |
| 830  | 0.840 | 0.835 | 0.845 | 0.841 |
| 840  | 0.831 | 0.826 | 0.830 | 0.830 |
| 850  | 0.843 | 0.839 | 0.841 | 0.842 |
| 860  | 0.849 | 0.845 | 0.851 | 0.849 |
| 870  | 0.832 | 0.828 | 0.830 | 0.833 |
| 880  | 0.828 | 0.823 | 0.836 | 0.826 |
| 890  | 0.838 | 0.833 | 0.825 | 0.837 |
| 900  | 0.838 | 0.833 | 0.840 | 0.838 |
| 910  | 0.844 | 0.840 | 0.847 | 0.842 |
| 920  | 0.840 | 0.836 | 0.826 | 0.841 |
| 930  | 0.849 | 0.844 | 0.857 | 0.850 |
| 940  | 0.848 | 0.844 | 0.846 | 0.849 |
| 950  | 0.846 | 0.842 | 0.847 | 0.847 |
| 960  | 0.845 | 0.841 | 0.841 | 0.847 |
| 970  | 0.851 | 0.847 | 0.854 | 0.853 |
| 980  | 0.836 | 0.832 | 0.834 | 0.837 |
| 990  | 0.836 | 0.831 | 0.838 | 0.837 |
| 1000 | 0.838 | 0.834 | 0.846 | 0.838 |
| 1010 | 0.837 | 0.833 | 0.847 | 0.837 |
| 1020 | 0.843 | 0.839 | 0.839 | 0.844 |
| 1030 | 0.851 | 0.847 | 0.850 | 0.852 |
| 1040 | 0.847 | 0.843 | 0.840 | 0.846 |
| 1050 | 0.837 | 0.833 | 0.833 | 0.837 |
| 1060 | 0.840 | 0.835 | 0.845 | 0.839 |

|      |       |       |       |       |
|------|-------|-------|-------|-------|
| 1070 | 0.829 | 0.824 | 0.827 | 0.829 |
| 1080 | 0.849 | 0.845 | 0.852 | 0.850 |
| 1090 | 0.838 | 0.834 | 0.844 | 0.838 |
| 1100 | 0.819 | 0.814 | 0.821 | 0.819 |
| 1110 | 0.849 | 0.844 | 0.848 | 0.849 |
| 1120 | 0.852 | 0.848 | 0.858 | 0.852 |
| 1130 | 0.845 | 0.841 | 0.850 | 0.846 |
| 1140 | 0.856 | 0.852 | 0.853 | 0.857 |
| 1150 | 0.850 | 0.846 | 0.851 | 0.850 |
| 1160 | 0.851 | 0.847 | 0.844 | 0.851 |
| 1170 | 0.846 | 0.842 | 0.853 | 0.848 |
| 1180 | 0.826 | 0.821 | 0.829 | 0.826 |
| 1190 | 0.855 | 0.851 | 0.858 | 0.856 |
| 1200 | 0.851 | 0.846 | 0.854 | 0.850 |
| 1210 | 0.834 | 0.830 | 0.837 | 0.836 |
| 1220 | 0.846 | 0.842 | 0.846 | 0.845 |
| 1230 | 0.847 | 0.843 | 0.853 | 0.848 |
| 1240 | 0.856 | 0.852 | 0.855 | 0.855 |
| 1250 | 0.849 | 0.844 | 0.848 | 0.848 |
| 1260 | 0.855 | 0.851 | 0.859 | 0.853 |
| 1270 | 0.854 | 0.850 | 0.852 | 0.853 |
| 1280 | 0.841 | 0.837 | 0.835 | 0.842 |
| 1290 | 0.841 | 0.837 | 0.845 | 0.843 |
| 1300 | 0.859 | 0.855 | 0.859 | 0.858 |
| 1310 | 0.847 | 0.843 | 0.846 | 0.849 |
| 1320 | 0.840 | 0.835 | 0.839 | 0.839 |
| 1330 | 0.862 | 0.858 | 0.856 | 0.864 |
| 1340 | 0.842 | 0.838 | 0.843 | 0.842 |
| 1350 | 0.851 | 0.847 | 0.856 | 0.852 |
| 1360 | 0.853 | 0.849 | 0.848 | 0.855 |
| 1370 | 0.836 | 0.832 | 0.832 | 0.838 |
| 1380 | 0.854 | 0.850 | 0.854 | 0.854 |
| 1390 | 0.851 | 0.847 | 0.841 | 0.853 |
| 1400 | 0.837 | 0.833 | 0.833 | 0.838 |
| 1410 | 0.849 | 0.845 | 0.847 | 0.849 |
| 1420 | 0.832 | 0.828 | 0.826 | 0.832 |
| 1430 | 0.840 | 0.836 | 0.840 | 0.840 |
| 1440 | 0.836 | 0.831 | 0.828 | 0.835 |
| 1450 | 0.834 | 0.830 | 0.831 | 0.835 |
| 1460 | 0.834 | 0.829 | 0.826 | 0.835 |
| 1470 | 0.834 | 0.829 | 0.831 | 0.835 |
| 1480 | 0.830 | 0.826 | 0.823 | 0.831 |
| 1490 | 0.840 | 0.835 | 0.836 | 0.841 |

|      |       |       |       |       |
|------|-------|-------|-------|-------|
| 1500 | 0.851 | 0.847 | 0.850 | 0.852 |
| 1510 | 0.832 | 0.828 | 0.831 | 0.834 |
| 1520 | 0.831 | 0.826 | 0.826 | 0.830 |
| 1530 | 0.849 | 0.845 | 0.850 | 0.847 |
| 1540 | 0.836 | 0.831 | 0.828 | 0.837 |
| 1550 | 0.834 | 0.829 | 0.829 | 0.835 |
| 1560 | 0.836 | 0.832 | 0.831 | 0.838 |
| 1570 | 0.834 | 0.830 | 0.827 | 0.833 |
| 1580 | 0.842 | 0.837 | 0.836 | 0.843 |
| 1590 | 0.832 | 0.828 | 0.830 | 0.832 |
| 1600 | 0.849 | 0.845 | 0.850 | 0.851 |
| 1610 | 0.836 | 0.831 | 0.826 | 0.835 |
| 1620 | 0.834 | 0.830 | 0.835 | 0.836 |
| 1630 | 0.843 | 0.839 | 0.840 | 0.843 |
| 1640 | 0.851 | 0.847 | 0.845 | 0.848 |
| 1650 | 0.825 | 0.820 | 0.823 | 0.825 |
| 1660 | 0.826 | 0.822 | 0.821 | 0.825 |
| 1670 | 0.832 | 0.828 | 0.835 | 0.833 |
| 1680 | 0.842 | 0.838 | 0.839 | 0.843 |
| 1690 | 0.837 | 0.833 | 0.831 | 0.836 |
| 1700 | 0.836 | 0.832 | 0.832 | 0.837 |
| 1710 | 0.837 | 0.833 | 0.838 | 0.837 |
| 1720 | 0.848 | 0.844 | 0.838 | 0.848 |
| 1730 | 0.838 | 0.834 | 0.837 | 0.840 |
| 1740 | 0.837 | 0.833 | 0.834 | 0.837 |
| 1750 | 0.832 | 0.828 | 0.829 | 0.833 |
| 1760 | 0.848 | 0.844 | 0.842 | 0.849 |
| 1770 | 0.840 | 0.836 | 0.836 | 0.840 |
| 1780 | 0.826 | 0.821 | 0.834 | 0.826 |
| 1790 | 0.832 | 0.828 | 0.827 | 0.832 |
| 1800 | 0.838 | 0.834 | 0.830 | 0.838 |
| 1810 | 0.843 | 0.839 | 0.831 | 0.843 |
| 1820 | 0.839 | 0.835 | 0.839 | 0.840 |
| 1830 | 0.838 | 0.833 | 0.841 | 0.838 |
| 1840 | 0.839 | 0.835 | 0.838 | 0.840 |
| 1850 | 0.833 | 0.828 | 0.830 | 0.833 |
| 1860 | 0.840 | 0.836 | 0.832 | 0.842 |
| 1870 | 0.837 | 0.833 | 0.839 | 0.838 |
| 1880 | 0.838 | 0.834 | 0.836 | 0.838 |
| 1890 | 0.842 | 0.838 | 0.848 | 0.843 |
| 1900 | 0.855 | 0.851 | 0.858 | 0.854 |
| 1910 | 0.830 | 0.825 | 0.829 | 0.830 |
| 1920 | 0.835 | 0.830 | 0.845 | 0.835 |

|      |       |       |       |       |
|------|-------|-------|-------|-------|
| 1930 | 0.851 | 0.847 | 0.847 | 0.852 |
| 1940 | 0.831 | 0.826 | 0.834 | 0.832 |
| 1950 | 0.843 | 0.839 | 0.844 | 0.843 |
| 1960 | 0.845 | 0.840 | 0.846 | 0.845 |
| 1970 | 0.828 | 0.823 | 0.826 | 0.830 |
| 1980 | 0.836 | 0.832 | 0.831 | 0.836 |
| 1990 | 0.847 | 0.843 | 0.848 | 0.847 |
| 2000 | 0.850 | 0.846 | 0.853 | 0.849 |
| 2010 | 0.822 | 0.817 | 0.819 | 0.822 |
| 2020 | 0.834 | 0.830 | 0.847 | 0.835 |
| 2030 | 0.840 | 0.835 | 0.841 | 0.838 |
| 2040 | 0.851 | 0.847 | 0.858 | 0.852 |
| 2050 | 0.842 | 0.838 | 0.842 | 0.842 |
| 2060 | 0.828 | 0.823 | 0.830 | 0.828 |
| 2070 | 0.845 | 0.841 | 0.842 | 0.846 |
| 2080 | 0.834 | 0.830 | 0.834 | 0.835 |
| 2090 | 0.842 | 0.838 | 0.830 | 0.844 |
| 2100 | 0.834 | 0.829 | 0.832 | 0.833 |
| 2110 | 0.851 | 0.847 | 0.857 | 0.851 |
| 2120 | 0.838 | 0.833 | 0.839 | 0.836 |
| 2130 | 0.836 | 0.831 | 0.831 | 0.836 |
| 2140 | 0.843 | 0.839 | 0.846 | 0.843 |
| 2150 | 0.831 | 0.826 | 0.826 | 0.831 |
| 2160 | 0.842 | 0.837 | 0.849 | 0.842 |
| 2170 | 0.832 | 0.828 | 0.837 | 0.833 |
| 2180 | 0.835 | 0.831 | 0.837 | 0.836 |
| 2190 | 0.841 | 0.837 | 0.846 | 0.842 |
| 2200 | 0.833 | 0.828 | 0.831 | 0.832 |
| 2210 | 0.835 | 0.831 | 0.832 | 0.836 |
| 2220 | 0.827 | 0.822 | 0.829 | 0.827 |
| 2230 | 0.837 | 0.833 | 0.832 | 0.837 |
| 2240 | 0.851 | 0.847 | 0.856 | 0.852 |
| 2250 | 0.854 | 0.850 | 0.848 | 0.854 |
| 2260 | 0.826 | 0.821 | 0.835 | 0.826 |
| 2270 | 0.832 | 0.827 | 0.836 | 0.831 |
| 2280 | 0.836 | 0.831 | 0.840 | 0.836 |
| 2290 | 0.844 | 0.840 | 0.843 | 0.843 |
| 2300 | 0.831 | 0.826 | 0.830 | 0.831 |
| 2310 | 0.851 | 0.847 | 0.852 | 0.851 |
| 2320 | 0.840 | 0.836 | 0.839 | 0.839 |
| 2330 | 0.846 | 0.842 | 0.839 | 0.846 |
| 2340 | 0.835 | 0.831 | 0.832 | 0.834 |
| 2350 | 0.834 | 0.829 | 0.832 | 0.834 |

|      |       |       |       |       |
|------|-------|-------|-------|-------|
| 2360 | 0.833 | 0.828 | 0.832 | 0.833 |
| 2370 | 0.843 | 0.839 | 0.838 | 0.844 |
| 2380 | 0.831 | 0.826 | 0.819 | 0.830 |
| 2390 | 0.853 | 0.849 | 0.850 | 0.852 |
| 2400 | 0.838 | 0.834 | 0.835 | 0.836 |
| 2410 | 0.841 | 0.837 | 0.835 | 0.841 |
| 2420 | 0.847 | 0.842 | 0.843 | 0.848 |
| 2430 | 0.832 | 0.828 | 0.835 | 0.831 |
| 2440 | 0.821 | 0.817 | 0.822 | 0.820 |
| 2450 | 0.849 | 0.845 | 0.850 | 0.848 |
| 2460 | 0.856 | 0.852 | 0.854 | 0.858 |
| 2470 | 0.842 | 0.838 | 0.848 | 0.843 |
| 2480 | 0.837 | 0.833 | 0.843 | 0.836 |
| 2490 | 0.847 | 0.843 | 0.851 | 0.847 |
| 2500 | 0.854 | 0.850 | 0.857 | 0.854 |
| 2510 | 0.828 | 0.824 | 0.827 | 0.828 |
| 2520 | 0.853 | 0.849 | 0.851 | 0.852 |
| 2530 | 0.839 | 0.835 | 0.843 | 0.840 |
| 2540 | 0.838 | 0.833 | 0.840 | 0.837 |
| 2550 | 0.842 | 0.838 | 0.849 | 0.843 |
| 2560 | 0.839 | 0.835 | 0.837 | 0.839 |
| 2570 | 0.850 | 0.846 | 0.855 | 0.849 |
| 2580 | 0.851 | 0.847 | 0.853 | 0.850 |
| 2590 | 0.828 | 0.823 | 0.836 | 0.827 |
| 2600 | 0.834 | 0.829 | 0.835 | 0.833 |
| 2610 | 0.836 | 0.831 | 0.837 | 0.835 |
| 2620 | 0.838 | 0.834 | 0.838 | 0.839 |
| 2630 | 0.832 | 0.827 | 0.828 | 0.831 |
| 2640 | 0.845 | 0.841 | 0.846 | 0.845 |
| 2650 | 0.829 | 0.824 | 0.833 | 0.829 |
| 2660 | 0.835 | 0.831 | 0.843 | 0.834 |
| 2670 | 0.833 | 0.829 | 0.839 | 0.833 |
| 2680 | 0.845 | 0.841 | 0.845 | 0.845 |
| 2690 | 0.847 | 0.842 | 0.849 | 0.847 |
| 2700 | 0.849 | 0.845 | 0.849 | 0.850 |
| 2710 | 0.828 | 0.824 | 0.829 | 0.829 |
| 2720 | 0.851 | 0.847 | 0.851 | 0.851 |
| 2730 | 0.838 | 0.834 | 0.841 | 0.837 |
| 2740 | 0.844 | 0.840 | 0.845 | 0.844 |
| 2750 | 0.840 | 0.835 | 0.841 | 0.839 |
| 2760 | 0.839 | 0.835 | 0.844 | 0.838 |
| 2770 | 0.845 | 0.841 | 0.844 | 0.845 |
| 2780 | 0.850 | 0.846 | 0.858 | 0.849 |

|      |       |       |       |       |
|------|-------|-------|-------|-------|
| 2790 | 0.842 | 0.838 | 0.842 | 0.843 |
| 2800 | 0.856 | 0.852 | 0.858 | 0.855 |
| 2810 | 0.851 | 0.847 | 0.855 | 0.849 |
| 2820 | 0.849 | 0.845 | 0.857 | 0.849 |
| 2830 | 0.843 | 0.839 | 0.850 | 0.841 |
| 2840 | 0.835 | 0.830 | 0.834 | 0.835 |
| 2850 | 0.837 | 0.833 | 0.841 | 0.837 |
| 2860 | 0.830 | 0.825 | 0.827 | 0.829 |
| 2870 | 0.834 | 0.829 | 0.836 | 0.833 |
| 2880 | 0.850 | 0.846 | 0.847 | 0.850 |
| 2890 | 0.840 | 0.836 | 0.840 | 0.839 |
| 2900 | 0.847 | 0.843 | 0.841 | 0.846 |
| 2910 | 0.845 | 0.840 | 0.843 | 0.844 |
| 2920 | 0.836 | 0.831 | 0.826 | 0.836 |
| 2930 | 0.836 | 0.831 | 0.844 | 0.835 |
| 2940 | 0.842 | 0.838 | 0.843 | 0.842 |
| 2950 | 0.829 | 0.824 | 0.831 | 0.826 |
| 2960 | 0.852 | 0.848 | 0.848 | 0.852 |
| 2970 | 0.844 | 0.840 | 0.840 | 0.845 |
| 2980 | 0.833 | 0.828 | 0.836 | 0.832 |
| 2990 | 0.857 | 0.854 | 0.861 | 0.856 |
| 3000 | 0.837 | 0.833 | 0.836 | 0.835 |
| 3010 | 0.838 | 0.834 | 0.831 | 0.839 |
| 3020 | 0.818 | 0.813 | 0.819 | 0.820 |
| 3030 | 0.842 | 0.838 | 0.841 | 0.842 |
| 3040 | 0.830 | 0.825 | 0.828 | 0.829 |
| 3050 | 0.848 | 0.844 | 0.853 | 0.846 |
| 3060 | 0.837 | 0.833 | 0.840 | 0.837 |
| 3070 | 0.835 | 0.831 | 0.834 | 0.834 |
| 3080 | 0.837 | 0.833 | 0.840 | 0.835 |
| 3090 | 0.840 | 0.836 | 0.839 | 0.840 |
| 3100 | 0.854 | 0.850 | 0.852 | 0.854 |
| 3110 | 0.845 | 0.840 | 0.843 | 0.844 |
| 3120 | 0.838 | 0.834 | 0.841 | 0.839 |
| 3130 | 0.838 | 0.833 | 0.844 | 0.837 |
| 3140 | 0.840 | 0.836 | 0.836 | 0.841 |
| 3150 | 0.838 | 0.834 | 0.832 | 0.838 |
| 3160 | 0.832 | 0.828 | 0.830 | 0.832 |
| 3170 | 0.840 | 0.835 | 0.839 | 0.840 |
| 3180 | 0.822 | 0.817 | 0.819 | 0.823 |
| 3190 | 0.830 | 0.826 | 0.825 | 0.830 |
| 3200 | 0.853 | 0.849 | 0.851 | 0.852 |
| 3210 | 0.832 | 0.828 | 0.824 | 0.832 |



|      |       |       |       |       |
|------|-------|-------|-------|-------|
| 3220 | 0.838 | 0.833 | 0.839 | 0.836 |
| 3230 | 0.840 | 0.836 | 0.841 | 0.839 |
| 3240 | 0.832 | 0.827 | 0.829 | 0.830 |
| 3250 | 0.852 | 0.848 | 0.852 | 0.852 |
| 3260 | 0.834 | 0.829 | 0.827 | 0.832 |
| 3270 | 0.840 | 0.836 | 0.844 | 0.840 |
| 3280 | 0.826 | 0.821 | 0.823 | 0.827 |
| 3290 | 0.830 | 0.825 | 0.829 | 0.830 |
| 3300 | 0.845 | 0.841 | 0.851 | 0.844 |
| 3310 | 0.842 | 0.838 | 0.845 | 0.842 |
| 3320 | 0.848 | 0.844 | 0.851 | 0.848 |
| 3330 | 0.845 | 0.841 | 0.849 | 0.844 |
| 3340 | 0.840 | 0.835 | 0.835 | 0.840 |
| 3350 | 0.851 | 0.847 | 0.850 | 0.850 |
| 3360 | 0.839 | 0.835 | 0.831 | 0.842 |
| 3370 | 0.849 | 0.845 | 0.853 | 0.847 |
| 3380 | 0.845 | 0.840 | 0.839 | 0.845 |
| 3390 | 0.840 | 0.836 | 0.846 | 0.839 |
| 3400 | 0.853 | 0.849 | 0.851 | 0.852 |
| 3410 | 0.851 | 0.847 | 0.856 | 0.851 |
| 3420 | 0.836 | 0.832 | 0.833 | 0.836 |
| 3430 | 0.841 | 0.837 | 0.839 | 0.840 |
| 3440 | 0.859 | 0.856 | 0.860 | 0.860 |
| 3450 | 0.860 | 0.856 | 0.854 | 0.860 |
| 3460 | 0.828 | 0.824 | 0.834 | 0.829 |
| 3470 | 0.850 | 0.846 | 0.855 | 0.849 |
| 3480 | 0.845 | 0.840 | 0.842 | 0.844 |
| 3490 | 0.836 | 0.832 | 0.830 | 0.836 |
| 3500 | 0.845 | 0.840 | 0.844 | 0.845 |
| 3510 | 0.855 | 0.851 | 0.859 | 0.853 |
| 3520 | 0.829 | 0.824 | 0.835 | 0.827 |
| 3530 | 0.839 | 0.835 | 0.836 | 0.839 |
| 3540 | 0.838 | 0.834 | 0.842 | 0.839 |
| 3550 | 0.834 | 0.830 | 0.835 | 0.833 |
| 3560 | 0.828 | 0.824 | 0.830 | 0.827 |
| 3570 | 0.839 | 0.835 | 0.837 | 0.839 |
| 3580 | 0.841 | 0.837 | 0.835 | 0.839 |
| 3590 | 0.828 | 0.823 | 0.826 | 0.829 |
| 3600 | 0.840 | 0.836 | 0.839 | 0.839 |
| 3610 | 0.853 | 0.849 | 0.857 | 0.853 |
| 3620 | 0.835 | 0.830 | 0.835 | 0.836 |
| 3630 | 0.825 | 0.820 | 0.821 | 0.824 |
| 3640 | 0.840 | 0.836 | 0.845 | 0.840 |

|      |       |       |       |       |
|------|-------|-------|-------|-------|
| 3650 | 0.855 | 0.851 | 0.856 | 0.855 |
| 3660 | 0.839 | 0.835 | 0.831 | 0.838 |
| 3670 | 0.850 | 0.846 | 0.848 | 0.849 |
| 3680 | 0.840 | 0.836 | 0.834 | 0.840 |
| 3690 | 0.847 | 0.843 | 0.841 | 0.848 |
| 3700 | 0.828 | 0.823 | 0.821 | 0.827 |
| 3710 | 0.843 | 0.839 | 0.841 | 0.843 |
| 3720 | 0.826 | 0.822 | 0.828 | 0.826 |
| 3730 | 0.836 | 0.831 | 0.835 | 0.836 |
| 3740 | 0.856 | 0.852 | 0.858 | 0.853 |
| 3750 | 0.851 | 0.847 | 0.842 | 0.851 |
| 3760 | 0.845 | 0.840 | 0.844 | 0.845 |
| 3770 | 0.832 | 0.827 | 0.829 | 0.832 |
| 3780 | 0.856 | 0.852 | 0.857 | 0.856 |
| 3790 | 0.844 | 0.840 | 0.844 | 0.842 |
| 3800 | 0.835 | 0.831 | 0.827 | 0.835 |
| 3810 | 0.835 | 0.831 | 0.829 | 0.832 |
| 3820 | 0.846 | 0.842 | 0.843 | 0.845 |
| 3830 | 0.855 | 0.851 | 0.850 | 0.857 |
| 3840 | 0.834 | 0.830 | 0.828 | 0.835 |
| 3850 | 0.829 | 0.824 | 0.823 | 0.830 |
| 3860 | 0.853 | 0.849 | 0.844 | 0.854 |
| 3870 | 0.845 | 0.841 | 0.842 | 0.845 |
| 3880 | 0.842 | 0.837 | 0.838 | 0.840 |
| 3890 | 0.843 | 0.839 | 0.842 | 0.842 |
| 3900 | 0.853 | 0.849 | 0.853 | 0.852 |
| 3910 | 0.851 | 0.847 | 0.848 | 0.850 |
| 3920 | 0.834 | 0.830 | 0.836 | 0.833 |
| 3930 | 0.838 | 0.833 | 0.835 | 0.837 |
| 3940 | 0.857 | 0.853 | 0.853 | 0.857 |
| 3950 | 0.850 | 0.846 | 0.845 | 0.851 |
| 3960 | 0.840 | 0.835 | 0.832 | 0.841 |
| 3970 | 0.825 | 0.820 | 0.819 | 0.825 |
| 3980 | 0.839 | 0.835 | 0.838 | 0.837 |
| 3990 | 0.827 | 0.822 | 0.825 | 0.827 |
| 4000 | 0.843 | 0.839 | 0.849 | 0.843 |
| 4010 | 0.840 | 0.836 | 0.843 | 0.839 |
| 4020 | 0.840 | 0.836 | 0.837 | 0.839 |
| 4030 | 0.830 | 0.826 | 0.822 | 0.830 |
| 4040 | 0.857 | 0.853 | 0.856 | 0.858 |
| 4050 | 0.847 | 0.843 | 0.850 | 0.848 |
| 4060 | 0.852 | 0.848 | 0.858 | 0.851 |
| 4070 | 0.839 | 0.835 | 0.836 | 0.841 |

|      |       |       |       |       |
|------|-------|-------|-------|-------|
| 4080 | 0.840 | 0.836 | 0.839 | 0.839 |
| 4090 | 0.855 | 0.851 | 0.853 | 0.853 |
| 4100 | 0.834 | 0.830 | 0.834 | 0.834 |
| 4110 | 0.838 | 0.834 | 0.844 | 0.838 |
| 4120 | 0.844 | 0.840 | 0.836 | 0.843 |
| 4130 | 0.856 | 0.852 | 0.851 | 0.855 |
| 4140 | 0.845 | 0.840 | 0.848 | 0.846 |
| 4150 | 0.847 | 0.843 | 0.843 | 0.845 |
| 4160 | 0.853 | 0.849 | 0.851 | 0.853 |
| 4170 | 0.836 | 0.831 | 0.828 | 0.836 |
| 4180 | 0.846 | 0.842 | 0.849 | 0.845 |
| 4190 | 0.860 | 0.856 | 0.860 | 0.860 |
| 4200 | 0.856 | 0.852 | 0.862 | 0.856 |
| 4210 | 0.838 | 0.833 | 0.835 | 0.836 |
| 4220 | 0.840 | 0.836 | 0.835 | 0.840 |
| 4230 | 0.842 | 0.838 | 0.844 | 0.842 |
| 4240 | 0.842 | 0.837 | 0.841 | 0.843 |
| 4250 | 0.843 | 0.839 | 0.845 | 0.843 |
| 4260 | 0.840 | 0.836 | 0.835 | 0.840 |
| 4270 | 0.846 | 0.842 | 0.846 | 0.846 |
| 4280 | 0.842 | 0.838 | 0.840 | 0.843 |
| 4290 | 0.848 | 0.844 | 0.841 | 0.848 |
| 4300 | 0.847 | 0.843 | 0.852 | 0.848 |
| 4310 | 0.835 | 0.831 | 0.838 | 0.836 |
| 4320 | 0.854 | 0.850 | 0.847 | 0.856 |
| 4330 | 0.834 | 0.830 | 0.836 | 0.832 |
| 4340 | 0.828 | 0.824 | 0.830 | 0.828 |
| 4350 | 0.847 | 0.842 | 0.844 | 0.847 |
| 4360 | 0.857 | 0.854 | 0.848 | 0.858 |
| 4370 | 0.839 | 0.835 | 0.847 | 0.840 |
| 4380 | 0.840 | 0.835 | 0.835 | 0.839 |
| 4390 | 0.847 | 0.843 | 0.850 | 0.846 |
| 4400 | 0.844 | 0.840 | 0.855 | 0.845 |
| 4410 | 0.841 | 0.837 | 0.836 | 0.841 |
| 4420 | 0.847 | 0.842 | 0.842 | 0.846 |
| 4430 | 0.835 | 0.831 | 0.835 | 0.834 |
| 4440 | 0.821 | 0.817 | 0.826 | 0.821 |
| 4450 | 0.843 | 0.839 | 0.839 | 0.844 |
| 4460 | 0.836 | 0.832 | 0.838 | 0.837 |
| 4470 | 0.838 | 0.834 | 0.826 | 0.839 |
| 4480 | 0.841 | 0.837 | 0.835 | 0.842 |
| 4490 | 0.852 | 0.848 | 0.849 | 0.852 |
| 4500 | 0.831 | 0.826 | 0.825 | 0.832 |

|      |       |       |       |       |
|------|-------|-------|-------|-------|
| 4510 | 0.856 | 0.852 | 0.856 | 0.857 |
| 4520 | 0.835 | 0.831 | 0.843 | 0.835 |
| 4530 | 0.851 | 0.847 | 0.853 | 0.851 |
| 4540 | 0.855 | 0.851 | 0.856 | 0.855 |
| 4550 | 0.847 | 0.843 | 0.844 | 0.847 |
| 4560 | 0.838 | 0.834 | 0.833 | 0.837 |
| 4570 | 0.855 | 0.851 | 0.851 | 0.855 |
| 4580 | 0.849 | 0.845 | 0.850 | 0.850 |
| 4590 | 0.851 | 0.847 | 0.848 | 0.851 |
| 4600 | 0.855 | 0.851 | 0.855 | 0.854 |
| 4610 | 0.839 | 0.835 | 0.841 | 0.840 |
| 4620 | 0.858 | 0.854 | 0.856 | 0.858 |
| 4630 | 0.845 | 0.840 | 0.838 | 0.845 |
| 4640 | 0.843 | 0.839 | 0.837 | 0.844 |
| 4650 | 0.850 | 0.846 | 0.846 | 0.849 |
| 4660 | 0.849 | 0.844 | 0.841 | 0.848 |
| 4670 | 0.859 | 0.855 | 0.864 | 0.859 |
| 4680 | 0.840 | 0.835 | 0.840 | 0.839 |
| 4690 | 0.840 | 0.836 | 0.845 | 0.841 |
| 4700 | 0.826 | 0.822 | 0.816 | 0.828 |
| 4710 | 0.847 | 0.842 | 0.853 | 0.846 |
| 4720 | 0.852 | 0.848 | 0.850 | 0.853 |
| 4730 | 0.845 | 0.840 | 0.841 | 0.844 |
| 4740 | 0.844 | 0.840 | 0.841 | 0.843 |
| 4750 | 0.855 | 0.851 | 0.857 | 0.856 |
| 4760 | 0.841 | 0.837 | 0.849 | 0.842 |
| 4770 | 0.836 | 0.831 | 0.843 | 0.836 |
| 4780 | 0.845 | 0.840 | 0.836 | 0.847 |
| 4790 | 0.835 | 0.830 | 0.827 | 0.835 |
| 4800 | 0.840 | 0.835 | 0.845 | 0.840 |
| 4810 | 0.853 | 0.849 | 0.851 | 0.854 |
| 4820 | 0.853 | 0.849 | 0.857 | 0.853 |
| 4830 | 0.840 | 0.835 | 0.827 | 0.840 |
| 4840 | 0.832 | 0.828 | 0.829 | 0.832 |
| 4850 | 0.840 | 0.836 | 0.842 | 0.840 |
| 4860 | 0.845 | 0.840 | 0.848 | 0.845 |
| 4870 | 0.853 | 0.849 | 0.861 | 0.853 |
| 4880 | 0.839 | 0.835 | 0.844 | 0.838 |
| 4890 | 0.848 | 0.844 | 0.846 | 0.848 |
| 4900 | 0.826 | 0.821 | 0.831 | 0.826 |
| 4910 | 0.842 | 0.838 | 0.845 | 0.843 |
| 4920 | 0.842 | 0.837 | 0.836 | 0.842 |
| 4930 | 0.838 | 0.833 | 0.837 | 0.838 |

|      |       |       |       |       |
|------|-------|-------|-------|-------|
| 4940 | 0.859 | 0.855 | 0.864 | 0.858 |
| 4950 | 0.828 | 0.823 | 0.823 | 0.826 |
| 4960 | 0.832 | 0.827 | 0.839 | 0.832 |
| 4970 | 0.846 | 0.842 | 0.843 | 0.847 |
| 4980 | 0.851 | 0.847 | 0.848 | 0.851 |
| 4990 | 0.849 | 0.845 | 0.847 | 0.850 |
| 5000 | 0.836 | 0.831 | 0.832 | 0.836 |
| 5010 | 0.843 | 0.839 | 0.843 | 0.843 |
| 5020 | 0.831 | 0.826 | 0.822 | 0.831 |
| 5030 | 0.834 | 0.829 | 0.838 | 0.834 |
| 5040 | 0.837 | 0.833 | 0.835 | 0.837 |
| 5050 | 0.836 | 0.831 | 0.832 | 0.835 |
| 5060 | 0.846 | 0.842 | 0.845 | 0.845 |
| 5070 | 0.845 | 0.840 | 0.835 | 0.844 |
| 5080 | 0.849 | 0.845 | 0.847 | 0.849 |
| 5090 | 0.829 | 0.824 | 0.820 | 0.829 |
| 5100 | 0.848 | 0.844 | 0.849 | 0.848 |
| 5110 | 0.842 | 0.838 | 0.835 | 0.844 |
| 5120 | 0.847 | 0.843 | 0.856 | 0.847 |
| 5130 | 0.861 | 0.857 | 0.857 | 0.860 |
| 5140 | 0.855 | 0.851 | 0.868 | 0.855 |
| 5150 | 0.836 | 0.831 | 0.837 | 0.836 |
| 5160 | 0.836 | 0.831 | 0.838 | 0.836 |
| 5170 | 0.837 | 0.833 | 0.828 | 0.839 |
| 5180 | 0.838 | 0.834 | 0.842 | 0.839 |
| 5190 | 0.842 | 0.838 | 0.841 | 0.842 |
| 5200 | 0.853 | 0.849 | 0.852 | 0.853 |
| 5210 | 0.842 | 0.838 | 0.839 | 0.842 |
| 5220 | 0.848 | 0.844 | 0.841 | 0.849 |
| 5230 | 0.837 | 0.833 | 0.836 | 0.838 |
| 5240 | 0.849 | 0.844 | 0.851 | 0.848 |
| 5250 | 0.840 | 0.836 | 0.845 | 0.841 |
| 5260 | 0.838 | 0.834 | 0.844 | 0.839 |
| 5270 | 0.850 | 0.846 | 0.837 | 0.852 |
| 5280 | 0.845 | 0.840 | 0.835 | 0.846 |
| 5290 | 0.850 | 0.846 | 0.847 | 0.852 |
| 5300 | 0.844 | 0.840 | 0.841 | 0.844 |
| 5310 | 0.836 | 0.831 | 0.834 | 0.835 |
| 5320 | 0.846 | 0.842 | 0.853 | 0.844 |
| 5330 | 0.849 | 0.844 | 0.849 | 0.850 |
| 5340 | 0.832 | 0.828 | 0.835 | 0.832 |
| 5350 | 0.851 | 0.847 | 0.857 | 0.851 |
| 5360 | 0.840 | 0.835 | 0.836 | 0.840 |

|      |       |       |       |       |
|------|-------|-------|-------|-------|
| 5370 | 0.838 | 0.833 | 0.832 | 0.838 |
| 5380 | 0.828 | 0.823 | 0.820 | 0.828 |
| 5390 | 0.850 | 0.846 | 0.847 | 0.851 |
| 5400 | 0.851 | 0.847 | 0.857 | 0.852 |
| 5410 | 0.836 | 0.832 | 0.838 | 0.838 |
| 5420 | 0.839 | 0.835 | 0.843 | 0.838 |
| 5430 | 0.845 | 0.841 | 0.839 | 0.846 |
| 5440 | 0.854 | 0.850 | 0.858 | 0.853 |
| 5450 | 0.830 | 0.826 | 0.836 | 0.830 |
| 5460 | 0.846 | 0.842 | 0.842 | 0.845 |
| 5470 | 0.842 | 0.837 | 0.842 | 0.842 |
| 5480 | 0.841 | 0.837 | 0.839 | 0.842 |
| 5490 | 0.847 | 0.843 | 0.840 | 0.848 |
| 5500 | 0.855 | 0.851 | 0.850 | 0.856 |
| 5510 | 0.856 | 0.852 | 0.855 | 0.855 |
| 5520 | 0.866 | 0.863 | 0.860 | 0.868 |
| 5530 | 0.826 | 0.821 | 0.820 | 0.826 |
| 5540 | 0.831 | 0.826 | 0.826 | 0.832 |
| 5550 | 0.841 | 0.837 | 0.844 | 0.840 |
| 5560 | 0.840 | 0.835 | 0.844 | 0.839 |
| 5570 | 0.848 | 0.844 | 0.846 | 0.849 |
| 5580 | 0.857 | 0.853 | 0.858 | 0.856 |
| 5590 | 0.849 | 0.845 | 0.844 | 0.849 |
| 5600 | 0.840 | 0.835 | 0.831 | 0.840 |
| 5610 | 0.855 | 0.851 | 0.848 | 0.856 |
| 5620 | 0.842 | 0.838 | 0.838 | 0.841 |
| 5630 | 0.840 | 0.835 | 0.847 | 0.839 |
| 5640 | 0.838 | 0.834 | 0.831 | 0.839 |
| 5650 | 0.833 | 0.828 | 0.821 | 0.834 |
| 5660 | 0.840 | 0.836 | 0.832 | 0.842 |
| 5670 | 0.845 | 0.841 | 0.849 | 0.845 |
| 5680 | 0.840 | 0.835 | 0.835 | 0.841 |
| 5690 | 0.856 | 0.852 | 0.849 | 0.855 |
| 5700 | 0.847 | 0.842 | 0.849 | 0.847 |
| 5710 | 0.847 | 0.842 | 0.850 | 0.847 |
| 5720 | 0.845 | 0.841 | 0.841 | 0.845 |
| 5730 | 0.833 | 0.828 | 0.832 | 0.834 |
| 5740 | 0.847 | 0.843 | 0.839 | 0.847 |
| 5750 | 0.853 | 0.849 | 0.856 | 0.854 |
| 5760 | 0.836 | 0.831 | 0.837 | 0.837 |
| 5770 | 0.832 | 0.827 | 0.825 | 0.832 |
| 5780 | 0.849 | 0.845 | 0.851 | 0.848 |
| 5790 | 0.840 | 0.835 | 0.831 | 0.840 |

|      |       |       |       |       |
|------|-------|-------|-------|-------|
| 5800 | 0.844 | 0.840 | 0.847 | 0.844 |
| 5810 | 0.847 | 0.843 | 0.846 | 0.847 |
| 5820 | 0.840 | 0.836 | 0.835 | 0.841 |
| 5830 | 0.845 | 0.841 | 0.846 | 0.844 |
| 5840 | 0.841 | 0.837 | 0.839 | 0.841 |
| 5850 | 0.838 | 0.834 | 0.842 | 0.839 |
| 5860 | 0.843 | 0.839 | 0.836 | 0.844 |
| 5870 | 0.837 | 0.833 | 0.840 | 0.837 |
| 5880 | 0.827 | 0.822 | 0.819 | 0.827 |
| 5890 | 0.853 | 0.849 | 0.844 | 0.854 |
| 5900 | 0.841 | 0.837 | 0.837 | 0.841 |
| 5910 | 0.834 | 0.830 | 0.842 | 0.833 |
| 5920 | 0.842 | 0.838 | 0.841 | 0.845 |
| 5930 | 0.839 | 0.835 | 0.837 | 0.839 |
| 5940 | 0.838 | 0.833 | 0.835 | 0.838 |
| 5950 | 0.851 | 0.847 | 0.849 | 0.851 |
| 5960 | 0.845 | 0.841 | 0.846 | 0.848 |
| 5970 | 0.834 | 0.830 | 0.832 | 0.834 |
| 5980 | 0.830 | 0.826 | 0.832 | 0.830 |
| 5990 | 0.829 | 0.824 | 0.835 | 0.828 |
| 6000 | 0.841 | 0.837 | 0.843 | 0.839 |
| 6010 | 0.850 | 0.846 | 0.856 | 0.850 |
| 6020 | 0.842 | 0.838 | 0.843 | 0.842 |
| 6030 | 0.851 | 0.847 | 0.851 | 0.852 |
| 6040 | 0.847 | 0.843 | 0.840 | 0.848 |
| 6050 | 0.831 | 0.826 | 0.835 | 0.832 |
| 6060 | 0.844 | 0.840 | 0.836 | 0.845 |
| 6070 | 0.840 | 0.835 | 0.839 | 0.841 |
| 6080 | 0.842 | 0.838 | 0.839 | 0.843 |
| 6090 | 0.835 | 0.831 | 0.822 | 0.836 |
| 6100 | 0.849 | 0.844 | 0.846 | 0.848 |
| 6110 | 0.826 | 0.822 | 0.819 | 0.827 |
| 6120 | 0.849 | 0.845 | 0.847 | 0.848 |
| 6130 | 0.840 | 0.836 | 0.842 | 0.838 |
| 6140 | 0.849 | 0.845 | 0.845 | 0.850 |
| 6150 | 0.835 | 0.831 | 0.832 | 0.835 |
| 6160 | 0.842 | 0.838 | 0.837 | 0.842 |
| 6170 | 0.839 | 0.835 | 0.831 | 0.839 |
| 6180 | 0.846 | 0.842 | 0.840 | 0.847 |
| 6190 | 0.835 | 0.831 | 0.833 | 0.836 |
| 6200 | 0.845 | 0.841 | 0.846 | 0.845 |
| 6210 | 0.831 | 0.826 | 0.824 | 0.831 |
| 6220 | 0.839 | 0.835 | 0.827 | 0.839 |

|      |       |       |       |       |
|------|-------|-------|-------|-------|
| 6230 | 0.829 | 0.824 | 0.821 | 0.829 |
| 6240 | 0.840 | 0.835 | 0.836 | 0.842 |
| 6250 | 0.853 | 0.849 | 0.852 | 0.854 |
| 6260 | 0.842 | 0.838 | 0.838 | 0.844 |
| 6270 | 0.838 | 0.834 | 0.834 | 0.838 |
| 6280 | 0.848 | 0.844 | 0.846 | 0.850 |
| 6290 | 0.847 | 0.843 | 0.843 | 0.848 |
| 6300 | 0.832 | 0.827 | 0.825 | 0.834 |
| 6310 | 0.844 | 0.840 | 0.847 | 0.844 |
| 6320 | 0.841 | 0.837 | 0.840 | 0.840 |
| 6330 | 0.837 | 0.833 | 0.833 | 0.836 |
| 6340 | 0.842 | 0.838 | 0.842 | 0.843 |
| 6350 | 0.836 | 0.832 | 0.833 | 0.836 |
| 6360 | 0.845 | 0.841 | 0.841 | 0.846 |
| 6370 | 0.847 | 0.843 | 0.848 | 0.846 |
| 6380 | 0.845 | 0.840 | 0.846 | 0.844 |
| 6390 | 0.839 | 0.835 | 0.835 | 0.840 |
| 6400 | 0.848 | 0.844 | 0.853 | 0.848 |
| 6410 | 0.843 | 0.839 | 0.846 | 0.844 |
| 6420 | 0.842 | 0.838 | 0.836 | 0.843 |
| 6430 | 0.850 | 0.846 | 0.848 | 0.849 |
| 6440 | 0.812 | 0.807 | 0.813 | 0.812 |
| 6450 | 0.838 | 0.833 | 0.833 | 0.839 |
| 6460 | 0.842 | 0.838 | 0.839 | 0.842 |
| 6470 | 0.853 | 0.849 | 0.843 | 0.853 |
| 6480 | 0.850 | 0.846 | 0.837 | 0.851 |
| 6490 | 0.842 | 0.838 | 0.837 | 0.843 |
| 6500 | 0.840 | 0.836 | 0.838 | 0.841 |
| 6510 | 0.838 | 0.833 | 0.825 | 0.840 |
| 6520 | 0.824 | 0.820 | 0.817 | 0.826 |
| 6530 | 0.838 | 0.834 | 0.833 | 0.837 |
| 6540 | 0.832 | 0.827 | 0.825 | 0.832 |
| 6550 | 0.826 | 0.821 | 0.816 | 0.828 |
| 6560 | 0.837 | 0.833 | 0.837 | 0.837 |
| 6570 | 0.842 | 0.838 | 0.838 | 0.843 |
| 6580 | 0.834 | 0.830 | 0.836 | 0.834 |
| 6590 | 0.827 | 0.822 | 0.818 | 0.827 |
| 6600 | 0.848 | 0.844 | 0.846 | 0.849 |
| 6610 | 0.839 | 0.835 | 0.834 | 0.839 |
| 6620 | 0.861 | 0.857 | 0.855 | 0.863 |
| 6630 | 0.836 | 0.832 | 0.831 | 0.837 |
| 6640 | 0.834 | 0.830 | 0.835 | 0.834 |
| 6650 | 0.838 | 0.834 | 0.835 | 0.839 |



|      |       |       |       |       |
|------|-------|-------|-------|-------|
| 6660 | 0.840 | 0.836 | 0.843 | 0.841 |
| 6670 | 0.815 | 0.810 | 0.820 | 0.814 |
| 6680 | 0.829 | 0.824 | 0.825 | 0.830 |
| 6690 | 0.845 | 0.840 | 0.836 | 0.845 |
| 6700 | 0.838 | 0.834 | 0.826 | 0.840 |
| 6710 | 0.843 | 0.839 | 0.839 | 0.844 |
| 6720 | 0.838 | 0.834 | 0.834 | 0.839 |
| 6730 | 0.858 | 0.854 | 0.853 | 0.858 |
| 6740 | 0.837 | 0.833 | 0.827 | 0.837 |
| 6750 | 0.847 | 0.842 | 0.841 | 0.846 |
| 6760 | 0.842 | 0.838 | 0.836 | 0.841 |
| 6770 | 0.838 | 0.834 | 0.836 | 0.838 |
| 6780 | 0.849 | 0.845 | 0.838 | 0.850 |
| 6790 | 0.837 | 0.833 | 0.829 | 0.836 |
| 6800 | 0.851 | 0.847 | 0.843 | 0.851 |
| 6810 | 0.835 | 0.831 | 0.832 | 0.834 |
| 6820 | 0.835 | 0.831 | 0.830 | 0.836 |
| 6830 | 0.829 | 0.824 | 0.826 | 0.827 |
| 6840 | 0.847 | 0.842 | 0.855 | 0.847 |
| 6850 | 0.849 | 0.845 | 0.847 | 0.847 |
| 6860 | 0.845 | 0.841 | 0.846 | 0.845 |
| 6870 | 0.843 | 0.839 | 0.844 | 0.844 |
| 6880 | 0.827 | 0.822 | 0.812 | 0.828 |
| 6890 | 0.839 | 0.835 | 0.826 | 0.839 |
| 6900 | 0.847 | 0.842 | 0.842 | 0.847 |
| 6910 | 0.849 | 0.845 | 0.840 | 0.851 |
| 6920 | 0.830 | 0.825 | 0.827 | 0.831 |
| 6930 | 0.858 | 0.854 | 0.860 | 0.858 |
| 6940 | 0.837 | 0.833 | 0.833 | 0.837 |
| 6950 | 0.845 | 0.840 | 0.833 | 0.846 |
| 6960 | 0.845 | 0.841 | 0.837 | 0.844 |
| 6970 | 0.830 | 0.825 | 0.835 | 0.830 |
| 6980 | 0.837 | 0.833 | 0.838 | 0.836 |
| 6990 | 0.838 | 0.834 | 0.841 | 0.837 |
| 7000 | 0.847 | 0.842 | 0.848 | 0.846 |
| 7010 | 0.838 | 0.833 | 0.846 | 0.837 |
| 7020 | 0.845 | 0.840 | 0.842 | 0.843 |
| 7030 | 0.861 | 0.857 | 0.864 | 0.860 |
| 7040 | 0.845 | 0.840 | 0.848 | 0.845 |
| 7050 | 0.849 | 0.844 | 0.840 | 0.850 |
| 7060 | 0.826 | 0.821 | 0.820 | 0.825 |
| 7070 | 0.845 | 0.841 | 0.844 | 0.846 |
| 7080 | 0.832 | 0.828 | 0.829 | 0.832 |

|      |       |       |       |       |
|------|-------|-------|-------|-------|
| 7090 | 0.842 | 0.838 | 0.837 | 0.843 |
| 7100 | 0.838 | 0.834 | 0.840 | 0.838 |
| 7110 | 0.834 | 0.830 | 0.836 | 0.835 |
| 7120 | 0.837 | 0.833 | 0.832 | 0.837 |
| 7130 | 0.855 | 0.851 | 0.854 | 0.855 |
| 7140 | 0.845 | 0.840 | 0.844 | 0.845 |
| 7150 | 0.853 | 0.849 | 0.848 | 0.853 |
| 7160 | 0.849 | 0.845 | 0.846 | 0.849 |
| 7170 | 0.838 | 0.833 | 0.834 | 0.838 |
| 7180 | 0.831 | 0.826 | 0.821 | 0.833 |
| 7190 | 0.826 | 0.822 | 0.827 | 0.827 |
| 7200 | 0.839 | 0.835 | 0.836 | 0.839 |
| 7210 | 0.834 | 0.829 | 0.830 | 0.833 |
| 7220 | 0.850 | 0.846 | 0.845 | 0.850 |
| 7230 | 0.835 | 0.830 | 0.830 | 0.836 |
| 7240 | 0.849 | 0.845 | 0.837 | 0.850 |
| 7250 | 0.846 | 0.842 | 0.843 | 0.846 |
| 7260 | 0.859 | 0.855 | 0.855 | 0.858 |
| 7270 | 0.830 | 0.825 | 0.821 | 0.829 |
| 7280 | 0.849 | 0.845 | 0.842 | 0.851 |
| 7290 | 0.830 | 0.825 | 0.822 | 0.828 |
| 7300 | 0.850 | 0.846 | 0.844 | 0.851 |
| 7310 | 0.843 | 0.839 | 0.828 | 0.844 |
| 7320 | 0.857 | 0.853 | 0.866 | 0.856 |
| 7330 | 0.841 | 0.837 | 0.832 | 0.840 |
| 7340 | 0.846 | 0.842 | 0.843 | 0.847 |
| 7350 | 0.847 | 0.843 | 0.848 | 0.848 |
| 7360 | 0.834 | 0.829 | 0.822 | 0.835 |
| 7370 | 0.830 | 0.826 | 0.824 | 0.831 |
| 7380 | 0.843 | 0.839 | 0.840 | 0.844 |
| 7390 | 0.835 | 0.831 | 0.830 | 0.836 |
| 7400 | 0.845 | 0.840 | 0.850 | 0.843 |
| 7410 | 0.847 | 0.843 | 0.847 | 0.848 |
| 7420 | 0.838 | 0.834 | 0.828 | 0.838 |
| 7430 | 0.850 | 0.846 | 0.846 | 0.850 |
| 7440 | 0.834 | 0.830 | 0.829 | 0.835 |
| 7450 | 0.848 | 0.844 | 0.844 | 0.848 |
| 7460 | 0.846 | 0.842 | 0.835 | 0.846 |
| 7470 | 0.842 | 0.838 | 0.847 | 0.843 |
| 7480 | 0.846 | 0.842 | 0.837 | 0.847 |
| 7490 | 0.841 | 0.837 | 0.838 | 0.841 |
| 7500 | 0.836 | 0.832 | 0.840 | 0.837 |
| 7510 | 0.840 | 0.836 | 0.840 | 0.840 |

|      |       |       |       |       |
|------|-------|-------|-------|-------|
| 7520 | 0.840 | 0.836 | 0.831 | 0.842 |
| 7530 | 0.831 | 0.826 | 0.827 | 0.831 |
| 7540 | 0.835 | 0.831 | 0.832 | 0.836 |
| 7550 | 0.842 | 0.838 | 0.841 | 0.843 |
| 7560 | 0.832 | 0.828 | 0.833 | 0.834 |
| 7570 | 0.844 | 0.840 | 0.843 | 0.843 |
| 7580 | 0.836 | 0.832 | 0.836 | 0.837 |
| 7590 | 0.835 | 0.831 | 0.825 | 0.836 |
| 7600 | 0.835 | 0.831 | 0.829 | 0.834 |
| 7610 | 0.840 | 0.836 | 0.833 | 0.841 |
| 7620 | 0.840 | 0.835 | 0.831 | 0.839 |
| 7630 | 0.845 | 0.840 | 0.833 | 0.844 |
| 7640 | 0.842 | 0.838 | 0.834 | 0.844 |
| 7650 | 0.848 | 0.844 | 0.842 | 0.848 |
| 7660 | 0.844 | 0.840 | 0.848 | 0.844 |
| 7670 | 0.835 | 0.831 | 0.828 | 0.835 |
| 7680 | 0.838 | 0.834 | 0.834 | 0.838 |
| 7690 | 0.842 | 0.838 | 0.839 | 0.842 |
| 7700 | 0.841 | 0.837 | 0.843 | 0.842 |
| 7710 | 0.849 | 0.845 | 0.840 | 0.850 |
| 7720 | 0.845 | 0.841 | 0.835 | 0.847 |
| 7730 | 0.837 | 0.833 | 0.837 | 0.838 |
| 7740 | 0.823 | 0.818 | 0.812 | 0.824 |
| 7750 | 0.842 | 0.837 | 0.839 | 0.842 |
| 7760 | 0.849 | 0.845 | 0.840 | 0.849 |
| 7770 | 0.855 | 0.851 | 0.853 | 0.856 |
| 7780 | 0.848 | 0.844 | 0.846 | 0.847 |
| 7790 | 0.845 | 0.840 | 0.829 | 0.843 |
| 7800 | 0.843 | 0.839 | 0.839 | 0.844 |
| 7810 | 0.834 | 0.830 | 0.833 | 0.835 |
| 7820 | 0.844 | 0.840 | 0.839 | 0.846 |
| 7830 | 0.838 | 0.833 | 0.842 | 0.837 |
| 7840 | 0.843 | 0.839 | 0.845 | 0.844 |
| 7850 | 0.832 | 0.827 | 0.824 | 0.831 |
| 7860 | 0.846 | 0.842 | 0.847 | 0.845 |
| 7870 | 0.826 | 0.821 | 0.820 | 0.824 |
| 7880 | 0.845 | 0.841 | 0.845 | 0.845 |
| 7890 | 0.856 | 0.852 | 0.852 | 0.857 |
| 7900 | 0.836 | 0.831 | 0.840 | 0.835 |
| 7910 | 0.818 | 0.813 | 0.807 | 0.820 |
| 7920 | 0.838 | 0.834 | 0.841 | 0.839 |
| 7930 | 0.834 | 0.830 | 0.833 | 0.834 |
| 7940 | 0.828 | 0.823 | 0.825 | 0.829 |

|      |       |       |       |       |
|------|-------|-------|-------|-------|
| 7950 | 0.840 | 0.835 | 0.831 | 0.840 |
| 7960 | 0.845 | 0.841 | 0.844 | 0.845 |
| 7970 | 0.845 | 0.840 | 0.840 | 0.845 |
| 7980 | 0.828 | 0.824 | 0.817 | 0.830 |
| 7990 | 0.843 | 0.839 | 0.839 | 0.844 |
| 8000 | 0.836 | 0.831 | 0.823 | 0.837 |
| 8010 | 0.845 | 0.840 | 0.840 | 0.845 |
| 8020 | 0.837 | 0.833 | 0.833 | 0.838 |
| 8030 | 0.821 | 0.817 | 0.828 | 0.822 |
| 8040 | 0.839 | 0.835 | 0.835 | 0.838 |
| 8050 | 0.856 | 0.852 | 0.844 | 0.858 |
| 8060 | 0.837 | 0.833 | 0.831 | 0.837 |
| 8070 | 0.829 | 0.824 | 0.825 | 0.830 |
| 8080 | 0.850 | 0.846 | 0.848 | 0.851 |
| 8090 | 0.844 | 0.840 | 0.834 | 0.845 |
| 8100 | 0.836 | 0.832 | 0.827 | 0.838 |
| 8110 | 0.840 | 0.836 | 0.835 | 0.840 |
| 8120 | 0.847 | 0.843 | 0.842 | 0.849 |
| 8130 | 0.836 | 0.831 | 0.828 | 0.838 |
| 8140 | 0.837 | 0.833 | 0.831 | 0.839 |
| 8150 | 0.840 | 0.836 | 0.829 | 0.840 |
| 8160 | 0.855 | 0.851 | 0.851 | 0.854 |
| 8170 | 0.830 | 0.825 | 0.829 | 0.830 |
| 8180 | 0.849 | 0.845 | 0.844 | 0.849 |
| 8190 | 0.832 | 0.827 | 0.825 | 0.833 |
| 8200 | 0.857 | 0.853 | 0.863 | 0.856 |
| 8210 | 0.836 | 0.832 | 0.838 | 0.837 |
| 8220 | 0.847 | 0.843 | 0.839 | 0.849 |
| 8230 | 0.851 | 0.847 | 0.851 | 0.851 |
| 8240 | 0.841 | 0.837 | 0.826 | 0.842 |
| 8250 | 0.837 | 0.833 | 0.834 | 0.837 |
| 8260 | 0.849 | 0.845 | 0.835 | 0.850 |
| 8270 | 0.844 | 0.840 | 0.841 | 0.844 |
| 8280 | 0.837 | 0.833 | 0.826 | 0.837 |
| 8290 | 0.840 | 0.836 | 0.839 | 0.840 |
| 8300 | 0.824 | 0.820 | 0.816 | 0.826 |
| 8310 | 0.838 | 0.833 | 0.830 | 0.840 |
| 8320 | 0.840 | 0.835 | 0.837 | 0.841 |
| 8330 | 0.832 | 0.828 | 0.827 | 0.834 |
| 8340 | 0.857 | 0.853 | 0.849 | 0.857 |
| 8350 | 0.845 | 0.841 | 0.842 | 0.845 |
| 8360 | 0.842 | 0.837 | 0.837 | 0.842 |
| 8370 | 0.849 | 0.844 | 0.842 | 0.849 |

|      |       |       |       |       |
|------|-------|-------|-------|-------|
| 8380 | 0.834 | 0.830 | 0.835 | 0.833 |
| 8390 | 0.836 | 0.832 | 0.829 | 0.837 |
| 8400 | 0.847 | 0.842 | 0.851 | 0.847 |
| 8410 | 0.836 | 0.832 | 0.833 | 0.837 |
| 8420 | 0.835 | 0.831 | 0.830 | 0.837 |
| 8430 | 0.828 | 0.823 | 0.817 | 0.829 |
| 8440 | 0.823 | 0.818 | 0.817 | 0.823 |
| 8450 | 0.842 | 0.837 | 0.840 | 0.842 |
| 8460 | 0.841 | 0.837 | 0.836 | 0.842 |
| 8470 | 0.844 | 0.840 | 0.843 | 0.846 |
| 8480 | 0.847 | 0.842 | 0.844 | 0.847 |
| 8490 | 0.849 | 0.845 | 0.845 | 0.849 |
| 8500 | 0.844 | 0.840 | 0.838 | 0.845 |
| 8510 | 0.848 | 0.844 | 0.851 | 0.848 |
| 8520 | 0.835 | 0.831 | 0.830 | 0.837 |
| 8530 | 0.842 | 0.837 | 0.836 | 0.843 |
| 8540 | 0.841 | 0.837 | 0.842 | 0.840 |
| 8550 | 0.830 | 0.825 | 0.825 | 0.830 |
| 8560 | 0.831 | 0.826 | 0.825 | 0.832 |
| 8570 | 0.847 | 0.842 | 0.840 | 0.847 |
| 8580 | 0.845 | 0.840 | 0.843 | 0.845 |
| 8590 | 0.839 | 0.835 | 0.833 | 0.840 |
| 8600 | 0.844 | 0.839 | 0.844 | 0.845 |
| 8610 | 0.849 | 0.845 | 0.841 | 0.850 |
| 8620 | 0.833 | 0.828 | 0.831 | 0.833 |
| 8630 | 0.839 | 0.835 | 0.824 | 0.839 |
| 8640 | 0.856 | 0.852 | 0.852 | 0.856 |
| 8650 | 0.844 | 0.840 | 0.845 | 0.843 |
| 8660 | 0.853 | 0.849 | 0.855 | 0.854 |
| 8670 | 0.852 | 0.848 | 0.844 | 0.852 |
| 8680 | 0.842 | 0.838 | 0.826 | 0.843 |
| 8690 | 0.833 | 0.828 | 0.829 | 0.835 |
| 8700 | 0.819 | 0.815 | 0.814 | 0.820 |
| 8710 | 0.844 | 0.840 | 0.838 | 0.845 |
| 8720 | 0.842 | 0.838 | 0.842 | 0.844 |
| 8730 | 0.832 | 0.827 | 0.826 | 0.834 |
| 8740 | 0.841 | 0.837 | 0.840 | 0.842 |
| 8750 | 0.834 | 0.829 | 0.827 | 0.835 |
| 8760 | 0.830 | 0.825 | 0.823 | 0.830 |
| 8770 | 0.837 | 0.833 | 0.831 | 0.837 |
| 8780 | 0.834 | 0.829 | 0.831 | 0.834 |
| 8790 | 0.842 | 0.837 | 0.838 | 0.843 |
| 8800 | 0.857 | 0.854 | 0.843 | 0.858 |

|      |       |       |       |       |
|------|-------|-------|-------|-------|
| 8810 | 0.843 | 0.839 | 0.840 | 0.845 |
| 8820 | 0.834 | 0.830 | 0.829 | 0.836 |
| 8830 | 0.838 | 0.833 | 0.839 | 0.839 |
| 8840 | 0.853 | 0.849 | 0.838 | 0.854 |
| 8850 | 0.834 | 0.829 | 0.828 | 0.832 |
| 8860 | 0.834 | 0.829 | 0.829 | 0.835 |
| 8870 | 0.851 | 0.847 | 0.841 | 0.851 |
| 8880 | 0.841 | 0.837 | 0.838 | 0.843 |
| 8890 | 0.840 | 0.836 | 0.841 | 0.841 |
| 8900 | 0.850 | 0.846 | 0.847 | 0.851 |
| 8910 | 0.840 | 0.835 | 0.829 | 0.840 |
| 8920 | 0.834 | 0.829 | 0.830 | 0.833 |
| 8930 | 0.840 | 0.836 | 0.831 | 0.843 |
| 8940 | 0.825 | 0.820 | 0.821 | 0.826 |
| 8950 | 0.845 | 0.841 | 0.845 | 0.847 |
