# Supplementary material for: Identification of Methylation Signatures and Rules for Sarcoma Subtypes by Machine Learning Methods
Source: Hindawi journal article supplement (doi:10.1155/2022/5297235), 2022-01-01
Supplement: f1 [file 5297235.f1.zip]

**Table S1:** Fifty-nine sarcoma subtypes and their sample sizes.

#

| Index | Class name (Abbreviation)                                   | Sample size |
|-------|-------------------------------------------------------------|-------------|
| 1     | angiomatoid fibrous histiocyte (AFH)                        | 12          |
| 2     | atypical fibroxanthoma (AFX)/pleomorphic dermal sarcoma PDS | 15          |
| 3     | angioleiomyoma (ALMO)/myopericytoma (MPC)                   | 16          |
| 4     | angiosarcoma (AS)                                           | 44          |
| 5     | alveolar soft part sarcoma (ASPS)                           | 27          |
| 6     | chondroblastoma (CB)                                        | 10          |
| 7     | clear cell sarcoma of soft parts (CCS)                      | 12          |
| 8     | clear cell sarcoma of the kidney (CCSK)                     | 12          |
| 9     | chordoma (CHORD)                                            | 74          |
| 10    | chondrosarcoma (CSA)                                        | 69          |
| 11    | clear cell chondrosarcoma (CSA (CC))                        | 8           |
| 12    | mesenchymal chondrosarcoma (CSA (MES))                      | 11          |
| 13    | control (CTRL)                                              | 10          |
| 14    | dermatofibrosarcoma protuberans (DFSP)                      | 39          |
| 15    | desmoplastic small round cell tumour (DSRCT)                | 42          |
| 16    | desmoid-type fibromatosis (DTFM)                            | 13          |
| 17    | epithelioid haemangioendothelioma (EHE)                     | 10          |
| 18    | extraskeletal myxoid chondrosarcoma (EMCS)                  | 10          |
| 19    | epithelioid sarcoma (ES)                                    | 32          |
| 20    | high-grade endometrial stromal sarcoma (ESS (HG))           | 11          |
| 21    | low-grade endometrial stromal sarcoma (ESS (LG))            | 18          |
| 22    | Ewing sarcoma (EWING)                                       | 77          |
| 23    | fibrous dysplasia (FDY)                                     | 14          |
| 24    | giant cell tumour of bone (GCTB)                            | 14          |
| 25    | gastrointestinal stromal tumour (GIST)                      | 52          |
| 26    | infantile fibrosarcoma (IFS)                                | 14          |
| 27    | inflammatory myofibroblastic tumour (IMT)                   | 13          |
| 28    | Kaposi sarcoma (KS)                                         | 8           |
| 29    | Langerhans cell histiocytosis (LCH)                         | 12          |
| 30    | low-grade fibromyxoid sarcoma (LGFMS)                       | 8           |
| 31    | lipoma (LIPO)                                               | 10          |
| 32    | leiomyoma (LMO)                                             | 7           |
| 33    | leiomyosarcoma (LMS)                                        | 69          |
| 34    | melanoma (MEL)                                              | 12          |
| 35    | myxoid liposarcoma (MLS)                                    | 38          |
| 36    | myositis ossificans (MO)                                    | 8           |
| 37    | myositis proliferans (MP)                                   | 8           |
| 38    | malignant peripheral nerve sheath tumour (MPNST)            | 39          |
| 39    | malignant rhabdoid tumour (MRT)                             | 24          |

|    |                                                                               |    |
|----|-------------------------------------------------------------------------------|----|
| 40 | muscle tissue (MUS)                                                           | 8  |
| 41 | nodular fasciitis(NFA)                                                        | 10 |
| 42 | neurofibroma (NFB)                                                            | 9  |
| 43 | plexiform neurofibroma (NFB (PLEX))                                           | 7  |
| 44 | osteoblastoma (OB)                                                            | 8  |
| 45 | ossifying fibromyxoid tumour (OFMT)                                           | 13 |
| 46 | high-grade conventional osteosarcoma (OS (HG))                                | 86 |
| 47 | reactive tissue (REA)                                                         | 10 |
| 48 | rhabdomyosarcoma (RMS)                                                        | 10 |
| 49 | alveolar rhabdomyosarcoma (RMS (ALV))                                         | 67 |
| 50 | embryonal rhabdomyosarcoma (RMS (EMB))                                        | 49 |
| 51 | sarcoma (SARC)                                                                | 19 |
| 52 | small blue round cell tumour (SBRCT)                                          | 23 |
| 53 | cutaneous squamous cell carcinoma (SCC (CUT))                                 | 10 |
| 54 | sclerosing epithelioid fibrosarcoma(SEF)                                      | 10 |
| 55 | solitary fibrous tumour (SFT)                                                 | 31 |
| 56 | schwannoma (SWN)                                                              | 30 |
| 57 | synovial sarcoma (SYSA)                                                       | 59 |
| 58 | undifferentiated sarcoma (USARC)                                              | 55 |
| 59 | well differentiated liposarcoma (WDLS)/dedifferentiated<br>liposarcoma (DDLs) | 37 |

#
