# Supplementary material for: Identification of Methylation Signatures and Rules for Sarcoma Subtypes by Machine Learning Methods
Source: Hindawi journal article supplement (doi:10.1155/2022/5297235), 2022-01-01
Supplement: f1 [file 5297235.f1.zip]

**Table S4:** Gene symbols obtained by annotating the most essential methylation sites derived from the LASSO, LightGBM, and MCFS feature lists.

(1) Genes extracted from the LASSO feature list

| <b>Index</b> | <b>Gene symbol</b> |
|--------------|--------------------|
| 1            | ITSN1              |
| 2            | LOC100133985       |
| 3            | PPP3CC             |
| 4            | ABLIM1             |
| 5            | CHD1               |
| 6            | WWP2               |
| 7            | NOTCH3             |
| 8            | NAT8L              |
| 9            | RAB40B             |
| 10           | MSI2               |
| 11           | ABR                |
| 12           | TPM1               |
| 13           | ADARB2             |
| 14           | BANF2              |
| 15           | DSTYK              |
| 16           | NFATC1             |
| 17           | EEPD1              |
| 18           | LDLR               |
| 19           | ZBTB47             |
| 20           | STK39              |
| 21           | ADAMTSL2           |
| 22           | RARA               |
| 23           | LOC728743          |
| 24           | ABHD6              |
| 25           | CCND1              |
| 26           | CIT                |
| 27           | FAM83A             |
| 28           | NET1               |
| 29           | PTPN21             |
| 30           | DDX17              |
| 31           | SNX29              |
| 32           | EI24               |
| 33           | ATP6V0A1           |
| 34           | ARHGEF4            |
| 35           | RBM24              |
| 36           | TBX15              |
| 37           | TNRC18             |
| 38           | SEPT9              |

|    |          |
|----|----------|
| 39 | EBF3     |
| 40 | PRKAR1B  |
| 41 | IL13     |
| 42 | WASF2    |
| 43 | RELL1    |
| 44 | FITM1    |
| 45 | DBNDD1   |
| 46 | BTBD11   |
| 47 | LRP3     |
| 48 | KLHL29   |
| 49 | MAP7D1   |
| 50 | MYO18B   |
| 51 | POLRMT   |
| 52 | TCF7L2   |
| 53 | CANX     |
| 54 | CDGAP    |
| 55 | KIAA0174 |
| 56 | ANO1     |
| 57 | STXBP5   |
| 58 | PDE8A    |
| 59 | NPFFR2   |
| 60 | FLNB     |
| 61 | CD109    |
| 62 | LITAF    |
| 63 | ETV6     |
| 64 | MCC      |
| 65 | ITSN2    |
| 66 | PPARGC1A |
| 67 | MAMSTR   |
| 68 | TK2      |
| 69 | CUGBP2   |
| 70 | NOS1     |
| 71 | OSBPL1A  |
| 72 | CBFA2T3  |
| 73 | ZNF788   |
| 74 | APOL3    |
| 75 | KIF19    |
| 76 | MYT1L    |
| 77 | DHRS7    |
| 78 | JAK1     |
| 79 | ARNT2    |
| 80 | HEXDC    |
| 81 | CHD9     |

|    |       |
|----|-------|
| 82 | FBXW8 |
| 83 | USP39 |

(2) Genes extracted from the LightGBM feature list

| <b>Index</b> | <b>Gene symbol</b> |
|--------------|--------------------|
| 1            | ANXA11             |
| 2            | SCAP               |
| 3            | TBX4               |
| 4            | USP3               |
| 5            | PAPOLA             |
| 6            | PCCA               |
| 7            | TUBB1              |
| 8            | RBPM5              |
| 9            | FAM178B            |
| 10           | C15orf61           |
| 11           | PCGF3              |
| 12           | MGMT               |
| 13           | HLTF               |
| 14           | TIAM2              |
| 15           | LDLR               |
| 16           | BBS9               |
| 17           | ESPNP              |
| 18           | NCOR2              |
| 19           | ENO3               |
| 20           | LTBP3              |
| 21           | NFIC               |
| 22           | ZC3H3              |
| 23           | BAHCC1             |
| 24           | MCC                |
| 25           | C1orf83            |
| 26           | ANKRD11            |
| 27           | LIPC               |
| 28           | IL13               |
| 29           | FLJ43663           |
| 30           | VRK3               |
| 31           | NFATC1             |
| 32           | AUTS2              |
| 33           | CDK10              |
| 34           | CFLAR              |
| 35           | MAFK               |
| 36           | PDS5A              |
| 37           | LONRF1             |
| 38           | FBXL7              |

|    |            |
|----|------------|
| 39 | CTDSPL     |
| 40 | C6orf129   |
| 41 | ADAR       |
| 42 | TRIM26     |
| 43 | TENC1      |
| 44 | C16orf45   |
| 45 | SEMA3B     |
| 46 | TSPAN5     |
| 47 | GPR137B    |
| 48 | ZMYND10    |
| 49 | S100A5     |
| 50 | PCOLCE     |
| 51 | PBX2       |
| 52 | LGALS8     |
| 53 | ZMAT3      |
| 54 | WDR27      |
| 55 | MACROD1    |
| 56 | SP140L     |
| 57 | REPS1      |
| 58 | PITRM1     |
| 59 | MAD1L1     |
| 60 | WDR60      |
| 61 | NSMCE2     |
| 62 | ACACA      |
| 63 | MSRA       |
| 64 | NCRNA00171 |
| 65 | SNX33      |
| 66 | LRP5       |
| 67 | ANO2       |
| 68 | NUDT16P    |
| 69 | SND1       |
| 70 | SH3RF3     |
| 71 | PARD3B     |
| 72 | CLUAP1     |
| 73 | CLPTM1L    |
| 74 | GRB2       |
| 75 | KRT18      |
| 76 | SFRS8      |
| 77 | PRKAR1B    |
| 78 | TLE2       |
| 79 | ASXL3      |
| 80 | LCK        |
| 81 | INPP5A     |

|     |            |
|-----|------------|
| 82  | ST6GALNAC4 |
| 83  | GLG1       |
| 84  | CTBP2      |
| 85  | LRRC27     |
| 86  | RALB       |
| 87  | PIGZ       |
| 88  | RAD51L1    |
| 89  | ECSCR      |
| 90  | HIRA       |
| 91  | CCDC12     |
| 92  | MEF2D      |
| 93  | CDYL       |
| 94  | KIF25      |
| 95  | DYSF       |
| 96  | AGPAT3     |
| 97  | SRBD1      |
| 98  | IER2       |
| 99  | ROPN1L     |
| 100 | CD109      |
| 101 | SIN3B      |
| 102 | RGS5       |
| 103 | TPO        |
| 104 | RPTOR      |
| 105 | ARTN       |
| 106 | NELL2      |
| 107 | TBC1D4     |
| 108 | ZNFX1      |
| 109 | 13-Sep     |
| 110 | CUL3       |
| 111 | MMP11      |
| 112 | RAB11FIP3  |
| 113 | MXI1       |
| 114 | ASAP2      |
| 115 | CCND1      |
| 116 | CCNY       |
| 117 | LETM1      |
| 118 | PPP1R9B    |
| 119 | NOS1       |
| 120 | PACS2      |
| 121 | ZMIZ1      |
| 122 | PHOSPHO1   |
| 123 | XPR1       |
| 124 | HAPLN2     |

|     |              |
|-----|--------------|
| 125 | C9orf3       |
| 126 | SLC37A3      |
| 127 | RGS3         |
| 128 | RHOU         |
| 129 | ABLIM1       |
| 130 | LYST         |
| 131 | LBX2         |
| 132 | PPP2R5E      |
| 133 | CHFR         |
| 134 | N4BP1        |
| 135 | C5orf52      |
| 136 | ITGA6        |
| 137 | SLC39A11     |
| 138 | ZBTB20       |
| 139 | NCRNA00162   |
| 140 | IRS2         |
| 141 | MYO18B       |
| 142 | COL1A1       |
| 143 | UST          |
| 144 | APLP2        |
| 145 | SHANK1       |
| 146 | RDH16        |
| 147 | SORCS2       |
| 148 | HES6         |
| 149 | NPFFR2       |
| 150 | CUX1         |
| 151 | FNBP1L       |
| 152 | BRE          |
| 153 | MAPKAP1      |
| 154 | ST3GAL3      |
| 155 | FGFRL1       |
| 156 | RARA         |
| 157 | C7orf50      |
| 158 | WDFY2        |
| 159 | SNX29        |
| 160 | RBM5         |
| 161 | MNT          |
| 162 | APOL1        |
| 163 | HK1          |
| 164 | NOS1AP       |
| 165 | ZNRF3        |
| 166 | LOC100129637 |
| 167 | DOCK1        |

|     |          |
|-----|----------|
| 168 | MEOX1    |
| 169 | VGLL4    |
| 170 | SLC17A3  |
| 171 | RBP2     |
| 172 | SYNCRIP  |
| 173 | RCBTB2   |
| 174 | OSBPL5   |
| 175 | KIF19    |
| 176 | RIPK4    |
| 177 | CBX2     |
| 178 | TSPAN14  |
| 179 | TBCD     |
| 180 | SH3PXD2B |
| 181 | GLI3     |
| 182 | TBX15    |
| 183 | ALDOA    |
| 184 | PCSK7    |
| 185 | FIS1     |
| 186 | TNRC18   |

(3) Genes extracted from the MCFS feature list

| <b>Index</b> | <b>Gene symbol</b> |
|--------------|--------------------|
| 1            | INPP5A             |
| 2            | PKP4               |
| 3            | GLI3               |
| 4            | TXNRD2             |
| 5            | NHEJ1              |
| 6            | TBC1D16            |
| 7            | ASAP2              |
| 8            | RAB2A              |
| 9            | PHOSPHO1           |
| 10           | WWP2               |
| 11           | LOC728264          |
| 12           | CTBP2              |
| 13           | OTUD7B             |
| 14           | PMVK               |
| 15           | C7orf50            |
| 16           | ADAM10             |
| 17           | PRKAR1B            |
| 18           | SEC14L1            |
