# Supplementary material for: Identification of Methylation Signatures and Rules for Sarcoma Subtypes by Machine Learning Methods
Source: Hindawi journal article supplement (doi:10.1155/2022/5297235), 2022-01-01
Supplement: f1 [file 5297235.f1.zip]

**Table S5:** Intersection of three gene sets annotated by most essential methylation sites extracted from the LASSO, LightGBM, and MCFS feature lists. The genes that appear in the 3, 2, and 1 gene subsets are shown.

| Genes in three sets | Genes in two sets | Genes in one set |
|---------------------|-------------------|------------------|
| PRKAR1B             | INPP5A            | PKP4             |
|                     | CTBP2             | TXNRD2           |
|                     | ASAP2             | NHEJ1            |
|                     | PHOSPHO1          | TBC1D16          |
|                     | C7orf50           | RAB2A            |
|                     | GLI3              | LOC728264        |
|                     | WWP2              | OTUD7B           |
|                     | ABLIM1            | PMVK             |
|                     | NFATC1            | ADAM10           |
|                     | LDLR              | SEC14L1          |
|                     | RARA              | ANXA11           |
|                     | CCND1             | SCAP             |
|                     | SNX29             | TBX4             |
|                     | TBX15             | USP3             |
|                     | TNRC18            | PAPOLA           |
|                     | IL13              | PCCA             |
|                     | MYO18B            | TUBB1            |
|                     | NPFFR2            | RBPM5            |
|                     | CD109             | FAM178B          |
|                     | MCC               | C15orf61         |
|                     | NOS1              | PCGF3            |
|                     | KIF19             | MGMT             |
|                     |                   | HLTF             |
|                     |                   | TIAM2            |
|                     |                   | BBS9             |
|                     |                   | ESPNP            |
|                     |                   | NCOR2            |
|                     |                   | ENO3             |
|                     |                   | LTBP3            |
|                     |                   | NFIC             |
|                     |                   | ZC3H3            |
|                     |                   | BAHCC1           |
|                     |                   | C1orf83          |
|                     |                   | ANKRD11          |
|                     |                   | LIPC             |
|                     |                   | FLJ43663         |
|                     |                   | VRK3             |
|                     |                   | AUTS2            |

|  |  |            |
|--|--|------------|
|  |  | CDK10      |
|  |  | CFLAR      |
|  |  | MAFK       |
|  |  | PDS5A      |
|  |  | LONRF1     |
|  |  | FBXL7      |
|  |  | CTDSPL     |
|  |  | C6orf129   |
|  |  | ADAR       |
|  |  | TRIM26     |
|  |  | TENC1      |
|  |  | C16orf45   |
|  |  | SEMA3B     |
|  |  | TSPAN5     |
|  |  | GPR137B    |
|  |  | ZMYND10    |
|  |  | S100A5     |
|  |  | PCOLCE     |
|  |  | PBX2       |
|  |  | LGALS8     |
|  |  | ZMAT3      |
|  |  | WDR27      |
|  |  | MACROD1    |
|  |  | SP140L     |
|  |  | REPS1      |
|  |  | PITRM1     |
|  |  | MAD1L1     |
|  |  | WDR60      |
|  |  | NSMCE2     |
|  |  | ACACA      |
|  |  | MSRA       |
|  |  | NCRNA00171 |
|  |  | SNX33      |
|  |  | LRP5       |
|  |  | ANO2       |
|  |  | NUDT16P    |
|  |  | SND1       |
|  |  | SH3RF3     |
|  |  | PARD3B     |
|  |  | CLUAP1     |
|  |  | CLPTM1L    |
|  |  | GRB2       |
|  |  | KRT18      |

|  |  |            |
|--|--|------------|
|  |  | SFRS8      |
|  |  | TLE2       |
|  |  | ASXL3      |
|  |  | LCK        |
|  |  | ST6GALNAC4 |
|  |  | GLG1       |
|  |  | LRRC27     |
|  |  | RALB       |
|  |  | PIGZ       |
|  |  | RAD51L1    |
|  |  | ECSCR      |
|  |  | HIRA       |
|  |  | CCDC12     |
|  |  | MEF2D      |
|  |  | CDYL       |
|  |  | KIF25      |
|  |  | DYSF       |
|  |  | AGPAT3     |
|  |  | SRBD1      |
|  |  | IER2       |
|  |  | ROPN1L     |
|  |  | SIN3B      |
|  |  | RGS5       |
|  |  | TPO        |
|  |  | RPTOR      |
|  |  | ARTN       |
|  |  | NELL2      |
|  |  | TBC1D4     |
|  |  | ZNFX1      |
|  |  | SEPT13     |
|  |  | CUL3       |
|  |  | MMP11      |
|  |  | RAB11FIP3  |
|  |  | MXI1       |
|  |  | CCNY       |
|  |  | LETM1      |
|  |  | PPP1R9B    |
|  |  | PACS2      |
|  |  | ZMIZ1      |
|  |  | XPR1       |
|  |  | HAPLN2     |
|  |  | C9orf3     |
|  |  | SLC37A3    |

|  |  |              |
|--|--|--------------|
|  |  | RGS3         |
|  |  | RHOU         |
|  |  | LYST         |
|  |  | LBX2         |
|  |  | PPP2R5E      |
|  |  | CHFR         |
|  |  | N4BP1        |
|  |  | C5orf52      |
|  |  | ITGA6        |
|  |  | SLC39A11     |
|  |  | ZBTB20       |
|  |  | NCRNA00162   |
|  |  | IRS2         |
|  |  | COL1A1       |
|  |  | UST          |
|  |  | APLP2        |
|  |  | SHANK1       |
|  |  | RDH16        |
|  |  | SORCS2       |
|  |  | HES6         |
|  |  | CUX1         |
|  |  | FNBP1L       |
|  |  | BRE          |
|  |  | MAPKAP1      |
|  |  | ST3GAL3      |
|  |  | FGFRL1       |
|  |  | WDFY2        |
|  |  | RBM5         |
|  |  | MNT          |
|  |  | APOL1        |
|  |  | HK1          |
|  |  | NOS1AP       |
|  |  | ZNRF3        |
|  |  | LOC100129637 |
|  |  | DOCK1        |
|  |  | MEOX1        |
|  |  | VGLL4        |
|  |  | SLC17A3      |
|  |  | RBP2         |
|  |  | SYNCRIP      |
|  |  | RCBTB2       |
|  |  | OSBPL5       |
|  |  | RIPK4        |

|  |  |              |
|--|--|--------------|
|  |  | CBX2         |
|  |  | TSPAN14      |
|  |  | TBCD         |
|  |  | SH3PXD2B     |
|  |  | ALDOA        |
|  |  | PCSK7        |
|  |  | FIS1         |
|  |  | ITSN1        |
|  |  | LOC100133985 |
|  |  | PPP3CC       |
|  |  | CHD1         |
|  |  | NOTCH3       |
|  |  | NAT8L        |
|  |  | RAB40B       |
|  |  | MSI2         |
|  |  | ABR          |
|  |  | TPM1         |
|  |  | ADARB2       |
|  |  | BANF2        |
|  |  | DSTYK        |
|  |  | EEPD1        |
|  |  | ZBTB47       |
|  |  | STK39        |
|  |  | ADAMTSL2     |
|  |  | LOC728743    |
|  |  | ABHD6        |
|  |  | CIT          |
|  |  | FAM83A       |
|  |  | NET1         |
|  |  | PTPN21       |
|  |  | DDX17        |
|  |  | EI24         |
|  |  | ATP6V0A1     |
|  |  | ARHGEF4      |
|  |  | RBM24        |
|  |  | SEPT9        |
|  |  | EBF3         |
|  |  | WASF2        |
|  |  | RELL1        |
|  |  | FITM1        |
|  |  | DBNDD1       |
|  |  | BTBD11       |
|  |  | LRP3         |

|  |  |          |
|--|--|----------|
|  |  | KLHL29   |
|  |  | MAP7D1   |
|  |  | POLRMT   |
|  |  | TCF7L2   |
|  |  | CANX     |
|  |  | CDGAP    |
|  |  | KIAA0174 |
|  |  | ANO1     |
|  |  | STXBP5   |
|  |  | PDE8A    |
|  |  | FLNB     |
|  |  | LITAF    |
|  |  | ETV6     |
|  |  | ITSN2    |
|  |  | PPARGC1A |
|  |  | MAMSTR   |
|  |  | TK2      |
|  |  | CUGBP2   |
|  |  | OSBPL1A  |
|  |  | CBFA2T3  |
|  |  | ZNF788   |
|  |  | APOL3    |
|  |  | MYT1L    |
|  |  | DHRS7    |
|  |  | JAK1     |
|  |  | ARNT2    |
|  |  | HEXDC    |
|  |  | CHD9     |
|  |  | FBXW8    |
|  |  | USP39    |
